# Supplementary material for: Genome-Wide Association Study of Suicide Attempts in Mood Disorder Patients
Source: Atypon-hosted journal article supplement (doi:10.1176/appi.ajp.2010.10040541), 2010-11-02
Supplement: ajp_167_12_1499_06.pdf [file ajp_167_12_1499_06.pdf]

| CHR | SNP        | POS       | GENE      | DISTANCE               | BAND   | A1/A2 | A1     | OR    | P        |
|-----|------------|-----------|-----------|------------------------|--------|-------|--------|-------|----------|
| 3   | rs1466846  | 178815700 | TBL1XR1   | 417958 base downstream | q26.32 | AG    | 0.285  | 0.738 | 1.98E-06 |
| 5   | rs924134   | 2521375   | IRX2      | 278504 base upstream   | p15.33 | AC    | 0.3736 | 0.776 | 6.12E-06 |
| 5   | rs6555113  | 2525928   | IRX2      | 273951 base upstream   | p15.33 | AT    | 0.639  | 1.296 | 6.32E-06 |
| 5   | rs3104229  | 2526843   | IRX2      | 273036 base upstream   | p15.33 | CG    | 0.6177 | 1.279 | 7.23E-06 |
| 5   | rs6880842  | 2522415   | IRX2      | 277464 base upstream   | p15.33 | AG    | 0.6181 | 1.277 | 7.36E-06 |
| 2   | rs6548036  | 30860228  | CAPN13    | intron 21              | p23.1  | CG    | 0.3395 | 1.303 | 7.37E-06 |
| 5   | rs3112426  | 2534088   | IRX2      | 265791 base upstream   | p15.33 | AC    | 0.6161 | 1.282 | 8.03E-06 |
| 8   | rs1457463  | 135168960 | ZNF406    | 390253 base upstream   | q24.22 | AG    | 0.5398 | 0.793 | 8.45E-06 |
| 5   | rs1992827  | 2541341   | IRX2      | 258538 base upstream   | p15.33 | CT    | 0.3844 | 0.781 | 8.70E-06 |
| 3   | rs9825151  | 178817943 | TBL1XR1   | 420201 base downstream | q26.32 | CT    | 0.6024 | 1.266 | 9.37E-06 |
| 3   | rs11130703 | 59333230  | FLJ42117  | 322475 base downstream | p14.2  | CT    | 0.3125 | 1.281 | 9.37E-06 |
| 2   | rs1568403  | 30854671  | CAPN13    | intron 21              | p23.1  | AG    | 0.3284 | 1.277 | 9.64E-06 |
| 2   | rs17010264 | 30855109  | CAPN13    | intron 21              | p23.1  | CG    | 0.6703 | 0.784 | 9.70E-06 |
| 2   | rs4952181  | 30855725  | CAPN13    | intron 21              | p23.1  | AT    | 0.6702 | 0.784 | 9.82E-06 |
| 13  | rs17067344 | 45344451  | LOC283514 | 20604 base downstream  | q14.12 | CT    | 0.044  | 0.553 | 1.01E-05 |
| 9   | rs4877830  | 86066135  | SLC28A3   | 16776 base upstream    | q21.32 | GT    | 0.0879 | 1.486 | 1.09E-05 |
| 13  | rs17067329 | 45341521  | LOC283514 | 17674 base downstream  | q14.12 | AT    | 0.0443 | 0.553 | 1.09E-05 |
| 13  | rs7982931  | 45343013  | LOC283514 | 19166 base downstream  | q14.12 | CT    | 0.9564 | 1.794 | 1.09E-05 |
| 13  | rs4942456  | 45339590  | LOC283514 | 15743 base downstream  | q14.12 | AG    | 0.0444 | 0.552 | 1.09E-05 |
| 13  | rs7998666  | 45341888  | LOC283514 | 18041 base downstream  | q14.12 | GT    | 0.9561 | 1.8   | 1.09E-05 |
| 13  | rs4941534  | 45339540  | LOC283514 | 15693 base downstream  | q14.12 | AT    | 0.0445 | 0.552 | 1.09E-05 |
| 2   | rs2030385  | 30858633  | CAPN13    | intron 21              | p23.1  | CT    | 0.3294 | 1.273 | 1.17E-05 |
| 2   | rs6710242  | 30859637  | CAPN13    | intron 21              | p23.1  | CT    | 0.6688 | 0.779 | 1.18E-05 |
| 6   | rs1338341  | 94830027  | EPHA7     | 644034 base downstream | q16.1  | AG    | 0.6732 | 0.785 | 1.18E-05 |
| 6   | rs1538283  | 94824189  | EPHA7     | 638196 base downstream | q16.1  | AG    | 0.6732 | 0.785 | 1.18E-05 |
| 13  | rs7983269  | 45343085  | LOC283514 | 19238 base downstream  | q14.12 | AG    | 0.0436 | 0.559 | 1.19E-05 |
| 6   | rs9354082  | 94830432  | EPHA7     | 644439 base downstream | q16.1  | CT    | 0.6732 | 0.786 | 1.21E-05 |
| 3   | rs9880740  | 178817999 | TBL1XR1   | 420257 base downstream | q26.32 | AG    | 0.6092 | 1.262 | 1.23E-05 |
| 2   | rs6548035  | 30859375  | CAPN13    | intron 21              | p23.1  | AG    | 0.3299 | 1.275 | 1.24E-05 |
| 6   | rs9445199  | 94830956  | EPHA7     | 644963 base downstream | q16.1  | AG    | 0.6732 | 0.786 | 1.24E-05 |
| 2   | rs2030386  | 30858916  | CAPN13    | intron 21              | p23.1  | AG    | 0.6708 | 0.787 | 1.26E-05 |
| 6   | rs2787944  | 94821751  | EPHA7     | 635758 base downstream | q16.1  | CT    | 0.3274 | 1.272 | 1.28E-05 |
| 6   | rs9351405  | 94834038  | EPHA7     | 648045 base downstream | q16.1  | AG    | 0.6732 | 0.786 | 1.32E-05 |
| 6   | rs1416058  | 94825178  | EPHA7     | 639185 base downstream | q16.1  | AT    | 0.3265 | 1.27  | 1.43E-05 |
| 6   | rs9354083  | 94830671  | EPHA7     | 644678 base downstream | q16.1  | CT    | 0.6734 | 0.787 | 1.48E-05 |
| 3   | rs1875102  | 178825162 | TBL1XR1   | 427420 base downstream | q26.32 | CT    | 0.609  | 1.258 | 1.55E-05 |

|    |            |           |          |                        |        |    |        |       |          |
|----|------------|-----------|----------|------------------------|--------|----|--------|-------|----------|
| 6  | rs9482753  | 99029526  | POU3F2   | 359774 base upstream   | q16.2  | AG | 0.9535 | 1.925 | 1.59E-05 |
| 6  | rs1488307  | 94772045  | EPHA7    | 586052 base downstream | q16.1  | CT | 0.3493 | 1.28  | 1.67E-05 |
| 9  | rs17427184 | 86103553  | SLC28A3  | intron 12              | q21.33 | AG | 0.0806 | 1.515 | 1.71E-05 |
| 6  | rs669021   | 94855791  | EPHA7    | 669798 base downstream | q16.1  | CT | 0.3255 | 1.27  | 1.92E-05 |
| 3  | rs11716881 | 178804169 | TBL1XR1  | 406427 base downstream | q26.32 | AG | 0.599  | 1.262 | 2.11E-05 |
| 3  | rs4241484  | 178798779 | TBL1XR1  | 401037 base downstream | q26.32 | AC | 0.599  | 1.263 | 2.12E-05 |
| 3  | rs6766914  | 178805561 | TBL1XR1  | 407819 base downstream | q26.32 | CT | 0.599  | 1.258 | 2.13E-05 |
| 6  | rs582835   | 94785340  | EPHA7    | 599347 base downstream | q16.1  | CT | 0.662  | 0.792 | 2.19E-05 |
| 7  | rs706568   | 136935020 | DGKI     | intron 23              | q33    | AT | 0.0538 | 1.671 | 2.26E-05 |
| 3  | rs4857716  | 178795570 | TBL1XR1  | 397828 base downstream | q26.32 | CT | 0.4009 | 0.79  | 2.31E-05 |
| 6  | rs1586510  | 94789896  | EPHA7    | 603903 base downstream | q16.1  | CT | 0.338  | 1.261 | 2.33E-05 |
| 7  | rs6949094  | 136934899 | DGKI     | intron 23              | q33    | CT | 0.048  | 1.681 | 2.38E-05 |
| 2  | rs2030383  | 30858582  | CAPN13   | intron 21              | p23.1  | GT | 0.6891 | 0.787 | 2.40E-05 |
| 2  | rs2030384  | 30858583  | CAPN13   | intron 21              | p23.1  | GT | 0.6892 | 0.787 | 2.50E-05 |
| 6  | rs667243   | 94818482  | EPHA7    | 632489 base downstream | q16.1  | AG | 0.3357 | 1.261 | 2.56E-05 |
| 6  | rs679881   | 94799746  | EPHA7    | 613753 base downstream | q16.1  | AG | 0.338  | 1.259 | 2.66E-05 |
| 6  | rs1463678  | 94800718  | EPHA7    | 614725 base downstream | q16.1  | AG | 0.338  | 1.259 | 2.68E-05 |
| 2  | rs12474717 | 55796721  | PNPT1    | 22258 base downstream  | p16.1  | GT | 0.887  | 0.686 | 2.98E-05 |
| 6  | rs2875662  | 94807741  | EPHA7    | 621748 base downstream | q16.1  | CT | 0.6621 | 0.796 | 3.02E-05 |
| 2  | rs2377685  | 106754304 | ST6GAL2  | 35235 base upstream    | q12.3  | GT | 0.2968 | 0.784 | 3.02E-05 |
| 10 | rs10887132 | 124083263 | C10orf87 | intron 13              | q26.13 | CT | 0.2681 | 0.766 | 3.10E-05 |
| 2  | rs1349065  | 106754740 | ST6GAL2  | 34799 base upstream    | q12.3  | CG | 0.7032 | 1.275 | 3.11E-05 |
| 6  | rs6919516  | 94816613  | EPHA7    | 630620 base downstream | q16.1  | AG | 0.3376 | 1.257 | 3.12E-05 |
| 10 | rs10887131 | 124083189 | C10orf87 | intron 13              | q26.13 | CG | 0.2681 | 0.766 | 3.12E-05 |
| 2  | rs17010236 | 30846223  | CAPN13   | intron 18              | p23.1  | GT | 0.325  | 1.256 | 3.15E-05 |
| 2  | rs17324843 | 30846381  | CAPN13   | intron 18              | p23.1  | AG | 0.6751 | 0.796 | 3.16E-05 |
| 5  | rs151152   | 13541800  | DNAH5    | 201636 base upstream   | p15.2  | CT | 0.853  | 0.722 | 3.17E-05 |
| 2  | rs11894298 | 106754935 | ST6GAL2  | 34604 base upstream    | q12.3  | CT | 0.2968 | 0.785 | 3.20E-05 |
| 6  | rs678036   | 94814119  | EPHA7    | 628126 base downstream | q16.1  | CG | 0.6621 | 0.796 | 3.24E-05 |
| 5  | rs3853117  | 13541819  | DNAH5    | 201617 base upstream   | p15.2  | CT | 0.853  | 0.723 | 3.26E-05 |
| 2  | rs11894451 | 106755254 | ST6GAL2  | 34285 base upstream    | q12.3  | CT | 0.2969 | 0.785 | 3.29E-05 |
| 2  | rs11887836 | 106755321 | ST6GAL2  | 34218 base upstream    | q12.3  | CG | 0.7031 | 1.273 | 3.39E-05 |
| 2  | rs11888992 | 106755485 | ST6GAL2  | 34054 base upstream    | q12.3  | CG | 0.703  | 1.273 | 3.44E-05 |
| 2  | rs6747891  | 106756383 | ST6GAL2  | 33156 base upstream    | q12.3  | AG | 0.297  | 0.786 | 3.46E-05 |
| 6  | rs9491646  | 99034084  | POU3F2   | 355216 base upstream   | q16.2  | AG | 0.0424 | 0.531 | 3.47E-05 |
| 6  | rs9491645  | 99032544  | POU3F2   | 356756 base upstream   | q16.2  | CT | 0.9577 | 1.881 | 3.48E-05 |
| 6  | rs9491644  | 99032521  | POU3F2   | 356779 base upstream   | q16.2  | AG | 0.9577 | 1.881 | 3.49E-05 |

|    |            |           |          |                        |        |    |        |       |          |
|----|------------|-----------|----------|------------------------|--------|----|--------|-------|----------|
| 2  | rs1448103  | 106757512 | ST6GAL2  | 32027 base upstream    | q12.3  | AG | 0.2971 | 0.786 | 3.52E-05 |
| 6  | rs11154359 | 99031598  | POU3F2   | 357702 base upstream   | q16.2  | AG | 0.0422 | 0.533 | 3.54E-05 |
| 2  | rs16830280 | 134733887 | MGAT5    | intron 1               | q21.2  | AT | 0.9361 | 0.631 | 3.57E-05 |
| 15 | rs10518706 | 51240801  | WDR72    | 352428 base upstream   | q21.3  | CT | 0.8207 | 0.752 | 3.59E-05 |
| 15 | rs11070957 | 51238288  | WDR72    | 354941 base upstream   | q21.3  | GT | 0.8207 | 0.752 | 3.60E-05 |
| 6  | rs9482751  | 99028026  | POU3F2   | 361274 base upstream   | q16.2  | CT | 0.958  | 1.868 | 3.65E-05 |
| 6  | rs1494770  | 99026958  | POU3F2   | 362342 base upstream   | q16.2  | CT | 0.042  | 0.536 | 3.65E-05 |
| 6  | rs9482752  | 99028948  | POU3F2   | 360352 base upstream   | q16.2  | AC | 0.042  | 0.535 | 3.66E-05 |
| 6  | rs9491640  | 99025985  | POU3F2   | 363315 base upstream   | q16.2  | AC | 0.042  | 0.536 | 3.66E-05 |
| 8  | rs7817295  | 14915797  | SGCZ     | intron 7               | p22    | AT | 0.516  | 0.805 | 3.70E-05 |
| 6  | rs9885878  | 99023244  | POU3F2   | 366056 base upstream   | q16.2  | AC | 0.0419 | 0.537 | 3.71E-05 |
| 6  | rs9491637  | 99024090  | POU3F2   | 365210 base upstream   | q16.2  | AG | 0.9581 | 1.863 | 3.71E-05 |
| 6  | rs9482747  | 99023189  | POU3F2   | 366111 base upstream   | q16.2  | CT | 0.9582 | 1.86  | 3.75E-05 |
| 2  | rs17033251 | 106759973 | ST6GAL2  | 29566 base upstream    | q12.3  | CT | 0.2984 | 0.784 | 3.78E-05 |
| 6  | rs1908399  | 99021767  | POU3F2   | 367533 base upstream   | q16.2  | AG | 0.9583 | 1.854 | 3.83E-05 |
| 2  | rs1448105  | 106761667 | ST6GAL2  | 27872 base upstream    | q12.3  | AT | 0.2989 | 0.783 | 3.86E-05 |
| 12 | rs11060565 | 128857653 | TMEM132D | intron 8               | q24.33 | CT | 0.1757 | 1.326 | 3.87E-05 |
| 3  | rs1984870  | 24690139  | THRB     | 178822 base downstream | p24.2  | GT | 0.5299 | 1.241 | 3.87E-05 |
| 6  | rs9491633  | 99021401  | POU3F2   | 367899 base upstream   | q16.2  | AC | 0.0416 | 0.54  | 3.90E-05 |
| 3  | rs1984874  | 24690109  | THRB     | 178792 base downstream | p24.2  | CT | 0.5297 | 1.241 | 3.91E-05 |
| 6  | rs9388491  | 99020082  | POU3F2   | 369218 base upstream   | q16.2  | AC | 0.9585 | 1.848 | 3.92E-05 |
| 6  | rs9491631  | 99021192  | POU3F2   | 368108 base upstream   | q16.2  | CT | 0.9584 | 1.849 | 3.93E-05 |
| 6  | rs9401880  | 99020505  | POU3F2   | 368795 base upstream   | q16.2  | CG | 0.9584 | 1.848 | 3.94E-05 |
| 6  | rs9491632  | 99021290  | POU3F2   | 368010 base upstream   | q16.2  | AT | 0.0416 | 0.541 | 3.94E-05 |
| 6  | rs9491625  | 99016428  | POU3F2   | 372872 base upstream   | q16.2  | AG | 0.0415 | 0.542 | 3.95E-05 |
| 6  | rs9482746  | 99021203  | POU3F2   | 368097 base upstream   | q16.2  | CT | 0.0416 | 0.541 | 3.95E-05 |
| 6  | rs12213284 | 99015010  | POU3F2   | 374290 base upstream   | q16.2  | GT | 0.0414 | 0.543 | 3.97E-05 |
| 15 | rs17545312 | 51214304  | ONECUT1  | 344803 base downstream | q21.3  | AG | 0.8215 | 0.755 | 4.22E-05 |
| 15 | rs17627721 | 51214080  | ONECUT1  | 344579 base downstream | q21.3  | GT | 0.8215 | 0.755 | 4.23E-05 |
| 2  | rs13010864 | 210430270 | C2orf21  | 60754 base downstream  | q34    | AG | 0.8693 | 0.718 | 4.24E-05 |
| 2  | rs17014915 | 78148150  | LRRTM4   | 545140 base downstream | p12    | CT | 0.2444 | 1.278 | 4.25E-05 |
| 2  | rs17014922 | 78149582  | LRRTM4   | 546572 base downstream | p12    | CT | 0.2444 | 1.278 | 4.28E-05 |
| 2  | rs10188275 | 71088630  | TEX261   | 13121 base downstream  | p13.3  | CT | 0.0543 | 0.58  | 4.32E-05 |
| 2  | rs10196871 | 71088542  | TEX261   | 13033 base downstream  | p13.3  | AG | 0.9457 | 1.726 | 4.32E-05 |
| 2  | rs10189222 | 71089555  | TEX261   | 14046 base downstream  | p13.3  | CT | 0.0543 | 0.577 | 4.45E-05 |
| 2  | rs10179209 | 71089580  | TEX261   | 14071 base downstream  | p13.3  | AG | 0.0544 | 0.575 | 4.51E-05 |
| 2  | rs728241   | 106764565 | ST6GAL2  | 24974 base upstream    | q12.3  | AG | 0.3041 | 0.776 | 4.84E-05 |

|    |            |           |           |                        |        |    |        |       |          |
|----|------------|-----------|-----------|------------------------|--------|----|--------|-------|----------|
| 3  | rs2362756  | 24691768  | THRB      | 180451 base downstream | p24.2  | GT | 0.5305 | 1.241 | 4.87E-05 |
| 21 | rs2837220  | 40082808  | LOC150084 | intron 6               | q22.2  | CT | 0.3851 | 1.24  | 4.88E-05 |
| 2  | rs728239   | 106764687 | ST6GAL2   | 24852 base upstream    | q12.3  | CT | 0.3043 | 0.776 | 4.88E-05 |
| 5  | rs2453814  | 2546280   | IRX2      | 253599 base upstream   | p15.33 | AC | 0.5845 | 1.24  | 4.92E-05 |
| 8  | rs16918988 | 54353550  | OPRK1     | 26803 base downstream  | q11.23 | CT | 0.8823 | 1.453 | 5.00E-05 |
| 2  | rs728240   | 106764888 | ST6GAL2   | 24651 base upstream    | q12.3  | GT | 0.6947 | 1.291 | 5.23E-05 |
| 20 | rs6019695  | 47271275  | DDX27     | intron 1               | q13.13 | AG | 0.0611 | 1.544 | 5.31E-05 |
| 2  | rs10194322 | 210423419 | C2orf21   | 53903 base downstream  | q34    | AG | 0.1212 | 1.391 | 5.40E-05 |
| 2  | rs7593426  | 210442080 | C2orf21   | 72564 base downstream  | q34    | AG | 0.1216 | 1.382 | 5.40E-05 |
| 2  | rs10194333 | 210423552 | C2orf21   | 54036 base downstream  | q34    | AC | 0.1212 | 1.39  | 5.43E-05 |
| 20 | rs6012627  | 47306203  | ZNF1      | intron 6               | q13.13 | AG | 0.9388 | 0.65  | 5.57E-05 |
| 2  | rs13013030 | 210425175 | C2orf21   | 55659 base downstream  | q34    | CG | 0.8784 | 0.721 | 5.58E-05 |
| 2  | rs7584039  | 210425771 | C2orf21   | 56255 base downstream  | q34    | CT | 0.1216 | 1.387 | 5.60E-05 |
| 2  | rs2191909  | 210427017 | C2orf21   | 57501 base downstream  | q34    | CG | 0.8783 | 0.721 | 5.64E-05 |
| 2  | rs7566741  | 210442197 | C2orf21   | 72681 base downstream  | q34    | AG | 0.8786 | 0.723 | 5.67E-05 |
| 2  | rs2159747  | 210427142 | C2orf21   | 57626 base downstream  | q34    | CT | 0.1219 | 1.384 | 5.75E-05 |
| 8  | rs2376420  | 54356965  | OPRK1     | 30218 base downstream  | q11.23 | AT | 0.1062 | 0.693 | 5.75E-05 |
| 8  | rs2376419  | 54357042  | OPRK1     | 30295 base downstream  | q11.23 | AG | 0.1062 | 0.693 | 5.75E-05 |
| 8  | rs4565474  | 54357197  | OPRK1     | 30450 base downstream  | q11.23 | AG | 0.894  | 1.445 | 5.77E-05 |
| 8  | rs2376418  | 54357083  | OPRK1     | 30336 base downstream  | q11.23 | AT | 0.894  | 1.445 | 5.77E-05 |
| 8  | rs2059547  | 54355648  | OPRK1     | 28901 base downstream  | q11.23 | CT | 0.1064 | 0.693 | 5.77E-05 |
| 8  | rs2376422  | 54356785  | OPRK1     | 30038 base downstream  | q11.23 | AG | 0.8936 | 1.442 | 5.78E-05 |
| 2  | rs10490027 | 210442707 | C2orf21   | 73191 base downstream  | q34    | AT | 0.1213 | 1.383 | 5.80E-05 |
| 8  | rs9792384  | 54352922  | OPRK1     | 26175 base downstream  | q11.23 | AG | 0.1068 | 0.695 | 5.82E-05 |
| 8  | rs9792266  | 54352873  | OPRK1     | 26126 base downstream  | q11.23 | AT | 0.1068 | 0.695 | 5.84E-05 |
| 8  | rs9792157  | 54348944  | OPRK1     | 22197 base downstream  | q11.23 | AC | 0.1068 | 0.696 | 5.87E-05 |
| 2  | rs7579121  | 210429691 | C2orf21   | 60175 base downstream  | q34    | CT | 0.1221 | 1.382 | 5.87E-05 |
| 15 | rs7168646  | 51305758  | WDR72     | 287471 base upstream   | q21.3  | AG | 0.8081 | 0.759 | 5.93E-05 |
| 8  | rs2162181  | 54346783  | OPRK1     | 20036 base downstream  | q11.23 | CT | 0.893  | 1.435 | 5.96E-05 |
| 9  | rs10868141 | 86111098  | SLC28A3   | intron 15              | q21.33 | CT | 0.9065 | 0.697 | 6.12E-05 |
| 2  | rs9631001  | 210433939 | C2orf21   | 64423 base downstream  | q34    | CT | 0.8776 | 0.725 | 6.13E-05 |
| 6  | rs9471557  | 41399757  | NCR2      | 11748 base upstream    | p21.1  | CT | 0.4283 | 1.238 | 6.14E-05 |
| 6  | rs9471560  | 41399986  | NCR2      | 11519 base upstream    | p21.1  | AG | 0.5717 | 0.807 | 6.14E-05 |
| 6  | rs10807260 | 41400115  | NCR2      | 11390 base upstream    | p21.1  | CT | 0.5717 | 0.808 | 6.16E-05 |
| 6  | rs12198812 | 41401304  | NCR2      | 10201 base upstream    | p21.1  | CT | 0.5718 | 0.808 | 6.16E-05 |
| 6  | rs10807261 | 41400213  | NCR2      | 11292 base upstream    | p21.1  | AC | 0.5718 | 0.808 | 6.16E-05 |
| 6  | rs9462699  | 41402041  | NCR2      | 9464 base upstream     | p21.1  | AG | 0.4282 | 1.238 | 6.18E-05 |

|    |            |           |          |                        |        |    |        |       |          |
|----|------------|-----------|----------|------------------------|--------|----|--------|-------|----------|
| 12 | rs1376797  | 128850548 | TMEM132D | intron 8               | q24.33 | CT | 0.1787 | 1.316 | 6.20E-05 |
| 6  | rs13219519 | 41402893  | NCR2     | 8612 base upstream     | p21.1  | AT | 0.5719 | 0.808 | 6.22E-05 |
| 6  | rs13203392 | 41402924  | NCR2     | 8581 base upstream     | p21.1  | CT | 0.4281 | 1.238 | 6.23E-05 |
| 2  | rs10178431 | 210413152 | C2orf21  | 43636 base downstream  | q34    | GT | 0.8784 | 0.711 | 6.24E-05 |
| 6  | rs2395773  | 41403590  | NCR2     | 7915 base upstream     | p21.1  | CT | 0.4281 | 1.238 | 6.24E-05 |
| 15 | rs16965587 | 51225655  | ONECUT1  | 356154 base downstream | q21.3  | GT | 0.8314 | 0.748 | 6.25E-05 |
| 6  | rs4605877  | 41403756  | NCR2     | 7749 base upstream     | p21.1  | GT | 0.572  | 0.808 | 6.27E-05 |
| 6  | rs2395774  | 41403603  | NCR2     | 7902 base upstream     | p21.1  | AG | 0.428  | 1.238 | 6.27E-05 |
| 2  | rs12328328 | 210443088 | C2orf21  | 73572 base downstream  | q34    | CT | 0.8789 | 0.724 | 6.29E-05 |
| 6  | rs9261043  | 30074705  | HCG9     | 20557 base downstream  | p21.33 | CT | 0.9386 | 0.639 | 6.30E-05 |
| 2  | rs9973787  | 210437244 | C2orf21  | 67728 base downstream  | q34    | AG | 0.8774 | 0.727 | 6.30E-05 |
| 6  | rs9471568  | 41404359  | NCR2     | 7146 base upstream     | p21.1  | CT | 0.4279 | 1.237 | 6.31E-05 |
| 6  | rs13208294 | 41404430  | NCR2     | 7075 base upstream     | p21.1  | AG | 0.4279 | 1.237 | 6.32E-05 |
| 2  | rs12329111 | 210443100 | C2orf21  | 73584 base downstream  | q34    | AC | 0.8789 | 0.724 | 6.34E-05 |
| 16 | rs12925611 | 26198350  | HS3ST4   | 141841 base downstream | p12.1  | CT | 0.7251 | 0.775 | 6.34E-05 |
| 6  | rs13208406 | 41404488  | NCR2     | 7017 base upstream     | p21.1  | AC | 0.4279 | 1.237 | 6.35E-05 |
| 6  | rs12525710 | 41404657  | NCR2     | 6848 base upstream     | p21.1  | CT | 0.4279 | 1.237 | 6.35E-05 |
| 2  | rs12328346 | 210443331 | C2orf21  | 73815 base downstream  | q34    | AG | 0.1211 | 1.381 | 6.40E-05 |
| 2  | rs7595063  | 210437762 | C2orf21  | 68246 base downstream  | q34    | AC | 0.1228 | 1.374 | 6.45E-05 |
| 2  | rs7598071  | 210437956 | C2orf21  | 68440 base downstream  | q34    | CG | 0.1228 | 1.374 | 6.51E-05 |
| 2  | rs10490028 | 210443405 | C2orf21  | 73889 base downstream  | q34    | CT | 0.8789 | 0.725 | 6.55E-05 |
| 2  | rs9973848  | 210438805 | C2orf21  | 69289 base downstream  | q34    | AG | 0.8772 | 0.728 | 6.58E-05 |
| 2  | rs12328869 | 210444413 | C2orf21  | 74897 base downstream  | q34    | AT | 0.1211 | 1.38  | 6.61E-05 |
| 2  | rs12328884 | 210444633 | C2orf21  | 75117 base downstream  | q34    | CT | 0.1211 | 1.38  | 6.62E-05 |
| 2  | rs9973317  | 210439257 | C2orf21  | 69741 base downstream  | q34    | CT | 0.8772 | 0.728 | 6.63E-05 |
| 2  | rs12329303 | 210444857 | C2orf21  | 75341 base downstream  | q34    | AG | 0.879  | 0.725 | 6.64E-05 |
| 3  | rs8177203  | 134952715 | TF       | intron 2               | q22.1  | AG | 0.9525 | 0.627 | 6.66E-05 |
| 2  | rs7581628  | 210446076 | C2orf21  | 76560 base downstream  | q34    | AG | 0.879  | 0.725 | 6.72E-05 |
| 6  | rs1905568  | 41405925  | NCR2     | 5580 base upstream     | p21.1  | CT | 0.4274 | 1.239 | 6.76E-05 |
| 2  | rs7581974  | 210446334 | C2orf21  | 76818 base downstream  | q34    | AG | 0.879  | 0.725 | 6.78E-05 |
| 6  | rs12208867 | 30134215  | ZNRD1    | 2799 base upstream     | p21.33 | AG | 0.0618 | 1.558 | 6.83E-05 |
| 2  | rs17748674 | 210447096 | C2orf21  | 77580 base downstream  | q34    | CT | 0.121  | 1.379 | 6.84E-05 |
| 2  | rs4952179  | 30848531  | CAPN13   | intron 19              | p23.1  | CT | 0.7132 | 0.797 | 6.86E-05 |
| 8  | rs7830450  | 135176557 | ZNF406   | 382656 base upstream   | q24.22 | CT | 0.5706 | 0.811 | 6.87E-05 |
| 6  | rs12208539 | 99010182  | POU3F2   | 379118 base upstream   | q16.2  | GT | 0.9607 | 1.805 | 6.87E-05 |
| 2  | rs17748692 | 210447119 | C2orf21  | 77603 base downstream  | q34    | CT | 0.121  | 1.379 | 6.93E-05 |
| 6  | rs2395775  | 41405993  | NCR2     | 5512 base upstream     | p21.1  | CG | 0.4272 | 1.24  | 6.99E-05 |

|    |            |           |               |                         |        |    |        |       |          |
|----|------------|-----------|---------------|-------------------------|--------|----|--------|-------|----------|
| 2  | rs1558474  | 210447598 | C2orf21       | 78082 base downstream   | q34    | CT | 0.879  | 0.726 | 7.00E-05 |
| 8  | rs9792306  | 54353314  | OPRK1         | 26567 base downstream   | q11.23 | CT | 0.1204 | 0.701 | 7.00E-05 |
| 2  | rs16843893 | 210449837 | C2orf21       | 80321 base downstream   | q34    | CT | 0.879  | 0.726 | 7.09E-05 |
| 2  | rs11682914 | 210450278 | C2orf21       | 80762 base downstream   | q34    | AG | 0.1209 | 1.378 | 7.12E-05 |
| 8  | rs16918960 | 54337603  | OPRK1         | 10856 base downstream   | q11.23 | AT | 0.1078 | 0.705 | 7.16E-05 |
| 2  | rs2109970  | 210450498 | C2orf21       | 80982 base downstream   | q34    | AG | 0.8791 | 0.726 | 7.17E-05 |
| 3  | rs4532136  | 134949575 | TF            | intron 1                | q22.1  | AG | 0.0485 | 1.589 | 7.25E-05 |
| 7  | rs1689304  | 52979122  | DKFZp564N247: | 91720 base upstream     | p12.1  | AC | 0.2106 | 1.29  | 7.35E-05 |
| 2  | rs17748818 | 210454100 | C2orf21       | 84584 base downstream   | q34    | CT | 0.8791 | 0.726 | 7.35E-05 |
| 7  | rs1689306  | 52979766  | DKFZp564N247: | 91076 base upstream     | p12.1  | AG | 0.2106 | 1.289 | 7.39E-05 |
| 11 | rs427875   | 115309136 | CADM1         | 428685 base downstream  | q23.2  | AC | 0.2656 | 1.273 | 7.42E-05 |
| 11 | rs4243917  | 10804775  | EIF4G2        | 17617 base downstream   | p15.3  | CT | 0.0861 | 0.678 | 7.51E-05 |
| 2  | rs17028360 | 64129701  | VPS54         | 29983 base downstream   | p14    | AG | 0.9461 | 0.64  | 7.57E-05 |
| 6  | rs10755717 | 41406187  | NCR2          | 5318 base upstream      | p21.1  | AG | 0.4266 | 1.243 | 7.60E-05 |
| 4  | rs2570071  | 58784187  | IGFBP7        | 1112891 base downstream | q12    | GT | 0.7147 | 1.262 | 7.62E-05 |
| 3  | rs8177186  | 134947891 | TF            | 33 base upstream        | q22.1  | GT | 0.9512 | 0.631 | 7.66E-05 |
| 6  | rs7771870  | 41406742  | NCR2          | 4763 base upstream      | p21.1  | AT | 0.4265 | 1.244 | 7.74E-05 |
| 8  | rs7819906  | 54411642  | OPRK1         | 84895 base downstream   | q11.23 | CT | 0.89   | 1.415 | 7.75E-05 |
| 20 | rs761498   | 47349857  | ZNFX1         | 21694 base downstream   | q13.13 | CT | 0.9391 | 0.654 | 7.78E-05 |
| 3  | rs8177185  | 134947308 | TF            | 616 base upstream       | q22.1  | AG | 0.0489 | 1.582 | 7.91E-05 |
| 4  | rs2570089  | 58794368  | IGFBP7        | 1123072 base downstream | q12    | CT | 0.7147 | 1.261 | 8.00E-05 |
| 1  | rs903050   | 110900289 | KCNA10        | 36969 base downstream   | p13.3  | CT | 0.1002 | 1.451 | 8.01E-05 |
| 4  | rs4460073  | 71142292  | CSN3          | 629 base upstream       | q13.3  | CT | 0.1173 | 0.723 | 8.01E-05 |
| 6  | rs12200527 | 99009252  | POU3F2        | 380048 base upstream    | q16.2  | AT | 0.9611 | 1.794 | 8.03E-05 |
| 21 | rs2837202  | 40065876  | LOC150084     | intron 4                | q22.2  | AT | 0.5532 | 0.807 | 8.08E-05 |
| 6  | rs9482736  | 99007342  | POU3F2        | 381958 base upstream    | q16.2  | CT | 0.9611 | 1.793 | 8.09E-05 |
| 8  | rs11995645 | 54427066  | OPRK1         | 100319 base downstream  | q11.23 | CT | 0.89   | 1.413 | 8.15E-05 |
| 6  | rs6941388  | 99031254  | POU3F2        | 358046 base upstream    | q16.2  | AT | 0.0469 | 0.571 | 8.16E-05 |
| 8  | rs11985025 | 54427119  | OPRK1         | 100372 base downstream  | q11.23 | AT | 0.89   | 1.413 | 8.22E-05 |
| 7  | rs706567   | 136933752 | DGKI          | intron 23               | q33    | CT | 0.0514 | 1.661 | 8.22E-05 |
| 7  | rs706562   | 136927210 | DGKI          | intron 22               | q33    | CG | 0.0517 | 1.665 | 8.45E-05 |
| 19 | rs870379   | 40235596  | HPN           | intron 5                | q13.11 | AG | 0.6439 | 0.806 | 8.47E-05 |
| 10 | rs1360550  | 30527766  | PAPD1         | 113998 base upstream    | p11.23 | AG | 0.6449 | 0.808 | 8.49E-05 |
| 4  | rs11133552 | 58818055  | IGFBP7        | 1146759 base downstream | q12    | AG | 0.7147 | 1.259 | 8.52E-05 |
| 6  | rs3125579  | 99015679  | POU3F2        | 373621 base upstream    | q16.2  | AG | 0.9538 | 1.729 | 8.62E-05 |
| 4  | rs2412885  | 58821899  | IGFBP7        | 1150603 base downstream | q12    | CT | 0.2853 | 0.794 | 8.62E-05 |
| 2  | rs11688226 | 210478772 | RPE           | 96824 base upstream     | q34    | CT | 0.8793 | 0.727 | 8.68E-05 |

|    |            |           |          |                         |        |    |        |       |           |
|----|------------|-----------|----------|-------------------------|--------|----|--------|-------|-----------|
| 4  | rs2244536  | 58824709  | IGFBP7   | 1153413 base downstream | q12    | AC | 0.7147 | 1.259 | 8.69E-05  |
| 4  | rs1368608  | 58828880  | IGFBP7   | 1157584 base downstream | q12    | AG | 0.2853 | 0.795 | 8.79E-05  |
| 8  | rs7465082  | 54386635  | OPRK1    | 59888 base downstream   | q11.23 | GT | 0.89   | 1.411 | 8.81E-05  |
| 20 | rs11907908 | 47357021  | ZNF406   | 28858 base downstream   | q13.13 | CT | 0.9392 | 0.655 | 8.91E-05  |
| 6  | rs9491610  | 99006740  | POU3F2   | 382560 base upstream    | q16.2  | AG | 0.9606 | 1.806 | 8.91E-05  |
| 8  | rs765847   | 135205190 | ZNF406   | 354023 base upstream    | q24.22 | AG | 0.4854 | 1.224 | 8.94E-05  |
| 8  | rs7011020  | 135210399 | ZNF406   | 348814 base upstream    | q24.22 | AG | 0.5146 | 0.817 | 8.98E-05  |
| 6  | rs3104078  | 99010723  | POU3F2   | 378577 base upstream    | q16.2  | AT | 0.0454 | 0.578 | 8.98E-05  |
| 4  | rs2553297  | 58833846  | IGFBP7   | 1162550 base downstream | q12    | CT | 0.2853 | 0.795 | 9.04E-05  |
| 10 | rs2462021  | 30530710  | PAPD1    | 111054 base upstream    | p11.23 | CT | 0.3552 | 1.237 | 9.06E-05  |
| 8  | rs1124525  | 135192071 | ZNF406   | 367142 base upstream    | q24.22 | AG | 0.5147 | 0.817 | 9.09E-05  |
| 2  | rs4848185  | 123110875 | TSN      | 868979 base downstream  | q14.3  | AG | 0.652  | 1.257 | 9.12E-05  |
| 5  | rs266581   | 64346595  | SDCCAG10 | intron 13               | q12.3  | AT | 0.8249 | 0.754 | 9.14E-05  |
| 8  | rs1446995  | 135211030 | ZNF406   | 348183 base upstream    | q24.22 | GT | 0.4854 | 1.223 | 9.14E-05  |
| 2  | rs11694132 | 210480528 | RPE      | 95068 base upstream     | q34    | AG | 0.8794 | 0.727 | 9.15E-05  |
| 2  | rs6739769  | 210481545 | RPE      | 94051 base upstream     | q34    | CT | 0.8794 | 0.727 | 9.23E-05  |
| 8  | rs4897681  | 135212703 | ZNF406   | 346510 base upstream    | q24.22 | CT | 0.4854 | 1.223 | 9.25E-05  |
| 8  | rs11995818 | 54378028  | OPRK1    | 51281 base downstream   | q11.23 | AT | 0.89   | 1.409 | 9.26E-05  |
| 2  | rs17039782 | 123110041 | TSN      | 868145 base downstream  | q14.3  | CT | 0.3485 | 0.797 | 9.31E-05  |
| 4  | rs1038151  | 136732205 | PABPC4L  | 1389852 base downstream | q28.3  | GT | 0.489  | 1.225 | 9.34E-05  |
| 8  | rs6994801  | 135214566 | ZNF406   | 344647 base upstream    | q24.22 | CG | 0.5146 | 0.818 | 9.37E-05  |
| 2  | rs987707   | 123108773 | TSN      | 866877 base downstream  | q14.3  | CT | 0.6511 | 1.253 | 9.50E-05  |
| 4  | rs2035293  | 136730586 | PABPC4L  | 1388233 base downstream | q28.3  | AG | 0.511  | 0.816 | 9.61E-05  |
| 8  | rs992526   | 135216479 | ZNF406   | 342734 base upstream    | q24.22 | CT | 0.5147 | 0.818 | 9.68E-05  |
| 4  | rs2086327  | 136730007 | PABPC4L  | 1387654 base downstream | q28.3  | AC | 0.511  | 0.817 | 9.93E-05  |
| 22 | rs5999742  | 33870423  | RAXLX    | 57045 base downstream   | q12.3  | AG | 0.7176 | 1.265 | 0.000101  |
| 5  | rs3112414  | 2561221   | IRX2     | 238658 base upstream    | p15.33 | CG | 0.5862 | 1.232 | 0.0001011 |
| 17 | rs9915451  | 51788210  | ANKFN1   | intron 5                | q22    | AG | 0.2536 | 1.268 | 0.0001019 |
| 2  | rs1371489  | 123098289 | TSN      | 856393 base downstream  | q14.3  | CT | 0.3428 | 0.802 | 0.0001028 |
| 6  | rs9491608  | 99005624  | POU3F2   | 383676 base upstream    | q16.2  | AG | 0.0402 | 0.548 | 0.0001031 |
| 2  | rs11897702 | 123106179 | TSN      | 864283 base downstream  | q14.3  | CT | 0.6492 | 1.243 | 0.0001032 |
| 17 | rs1547966  | 51779870  | ANKFN1   | intron 3                | q22    | CT | 0.2585 | 1.273 | 0.0001046 |
| 2  | rs1918273  | 123091471 | TSN      | 849575 base downstream  | q14.3  | GT | 0.3424 | 0.803 | 0.0001051 |
| 6  | rs1488324  | 94792276  | EPHA7    | 606283 base downstream  | q16.1  | AG | 0.3256 | 1.239 | 0.0001052 |
| 16 | rs17146172 | 7343080   | A2BP1    | intron 4                | p13.2  | CT | 0.1066 | 1.383 | 0.0001073 |
| 16 | rs9933137  | 7342542   | A2BP1    | intron 4                | p13.2  | GT | 0.1066 | 1.382 | 0.0001074 |
| 15 | rs690535   | 51194001  | ONECUT1  | 324500 base downstream  | q21.3  | GT | 0.1901 | 1.302 | 0.0001075 |

|    |            |           |           |                        |        |    |        |       |           |
|----|------------|-----------|-----------|------------------------|--------|----|--------|-------|-----------|
| 12 | rs825959   | 89248606  | C12orf12  | 621517 base upstream   | q21.33 | CT | 0.6379 | 1.242 | 0.00011   |
| 16 | rs17842417 | 7340883   | A2BP1     | intron 4               | p13.2  | CT | 0.1066 | 1.38  | 0.0001101 |
| 6  | rs6910965  | 25280013  | LRRRC16   | 107613 base upstream   | p22.2  | CG | 0.1856 | 0.764 | 0.0001104 |
| 17 | rs8082579  | 51771638  | ANKFN1    | intron 3               | q22    | GT | 0.7409 | 0.786 | 0.0001106 |
| 22 | rs5750066  | 33870522  | RAXLX     | 57144 base downstream  | q12.3  | GT | 0.7087 | 1.265 | 0.0001107 |
| 11 | rs836123   | 34519515  | ELF5      | 27609 base downstream  | p13    | CT | 0.9311 | 0.654 | 0.0001123 |
| 21 | rs11088495 | 40081547  | LOC150084 | intron 5               | q22.2  | CT | 0.6049 | 0.815 | 0.000113  |
| 10 | rs2482824  | 30517781  | PAPD1     | 123983 base upstream   | p11.23 | CT | 0.644  | 0.812 | 0.000114  |
| 16 | rs17143484 | 7339253   | A2BP1     | intron 4               | p13.2  | CT | 0.1067 | 1.377 | 0.0001143 |
| 16 | rs9924010  | 7338996   | A2BP1     | intron 4               | p13.2  | AG | 0.1067 | 1.377 | 0.0001148 |
| 6  | rs9471573  | 41405361  | NCR2      | 6144 base upstream     | p21.1  | AG | 0.5624 | 0.812 | 0.0001149 |
| 15 | rs11858823 | 51190404  | ONECUT1   | 320903 base downstream | q21.3  | AG | 0.1947 | 1.297 | 0.0001153 |
| 6  | rs9384246  | 155209126 | RBM16     | 12242 base downstream  | q25.2  | CT | 0.0374 | 0.548 | 0.0001156 |
| 10 | rs2505112  | 30517210  | PAPD1     | 124554 base upstream   | p11.23 | CT | 0.3561 | 1.231 | 0.0001176 |
| 2  | rs1439724  | 209684516 | MAP2      | 312499 base upstream   | q34    | AG | 0.1488 | 1.332 | 0.0001179 |
| 3  | rs820464   | 124839752 | MYLK      | intron 6               | q21.1  | CG | 0.0542 | 1.553 | 0.0001187 |
| 3  | rs820460   | 124837883 | MYLK      | intron 5               | q21.1  | CT | 0.0542 | 1.554 | 0.0001187 |
| 3  | rs1254401  | 124836431 | MYLK      | intron 5               | q21.1  | CG | 0.0542 | 1.554 | 0.0001188 |
| 3  | rs820463   | 124839727 | MYLK      | EXON 6                 | q21.1  | AG | 0.9458 | 0.644 | 0.0001188 |
| 3  | rs1254397  | 124833978 | MYLK      | intron 5               | q21.1  | CT | 0.9458 | 0.644 | 0.0001189 |
| 11 | rs7103202  | 10779614  | EIF4G2    | intron 8               | p15.3  | AG | 0.0758 | 0.681 | 0.0001189 |
| 3  | rs1254403  | 124840968 | MYLK      | intron 6               | q21.1  | AC | 0.9458 | 0.644 | 0.000119  |
| 11 | rs4909953  | 10776960  | EIF4G2    | intron 1               | p15.3  | AC | 0.0758 | 0.681 | 0.000119  |
| 3  | rs820470   | 124845546 | MYLK      | intron 7               | q21.1  | CT | 0.0542 | 1.553 | 0.0001192 |
| 11 | rs10743150 | 10781116  | EIF4G2    | intron 11              | p15.3  | AG | 0.9242 | 1.468 | 0.0001197 |
| 3  | rs820472   | 124847003 | MYLK      | intron 7               | q21.1  | CT | 0.0542 | 1.553 | 0.0001201 |
| 11 | rs7932171  | 10783496  | EIF4G2    | intron 18              | p15.3  | CT | 0.9242 | 1.468 | 0.0001208 |
| 3  | rs820446   | 124831466 | MYLK      | intron 5               | q21.1  | CT | 0.0542 | 1.553 | 0.0001214 |
| 4  | rs6811079  | 175703538 | HPGD      | 23352 base downstream  | q34.1  | AG | 0.0917 | 0.688 | 0.0001221 |
| 3  | rs820455   | 124823568 | MYLK      | intron 3               | q21.1  | AG | 0.9458 | 0.644 | 0.0001232 |
| 3  | rs820459   | 124820628 | MYLK      | intron 2               | q21.1  | AG | 0.9458 | 0.644 | 0.0001233 |
| 3  | rs848145   | 124819672 | MYLK      | intron 1               | q21.1  | AG | 0.0542 | 1.552 | 0.0001234 |
| 2  | rs10490026 | 210441690 | C2orf21   | 72174 base downstream  | q34    | AG | 0.1214 | 1.359 | 0.0001268 |
| 2  | rs10490025 | 210441645 | C2orf21   | 72129 base downstream  | q34    | AT | 0.8786 | 0.736 | 0.0001268 |
| 6  | rs9357353  | 41385833  | TREM1     | 23398 base downstream  | p21.1  | CT | 0.4184 | 1.234 | 0.0001278 |
| 3  | rs1254389  | 124852418 | MYLK      | intron 10              | q21.1  | AT | 0.0539 | 1.549 | 0.0001285 |
| 15 | rs10518710 | 51245627  | WDR72     | 347602 base upstream   | q21.3  | CG | 0.1871 | 1.294 | 0.0001304 |



|    |            |           |               |                         |        |    |        |       |           |
|----|------------|-----------|---------------|-------------------------|--------|----|--------|-------|-----------|
| 2  | rs1439736  | 209659240 | MAP2          | 337775 base upstream    | q34    | GT | 0.8516 | 0.752 | 0.0001306 |
| 4  | rs16895934 | 9892151   | KIAA1729      | 158450 base upstream    | p16.1  | GT | 0.006  | 3.933 | 0.0001325 |
| 3  | rs2362754  | 24675281  | THRB          | 163964 base downstream  | p24.2  | CG | 0.4793 | 0.819 | 0.0001358 |
| 4  | rs2553316  | 58802595  | IGFBP7        | 1131299 base downstream | q12    | CG | 0.6927 | 1.253 | 0.0001365 |
| 10 | rs2488010  | 30531413  | PAPD1         | 110351 base upstream    | p11.23 | AG | 0.356  | 1.23  | 0.0001372 |
| 8  | rs7842645  | 135163085 | ZNF406        | 396128 base upstream    | q24.22 | AG | 0.4783 | 1.219 | 0.000138  |
| 3  | rs4452272  | 24666213  | THRB          | 154896 base downstream  | p24.2  | CT | 0.479  | 0.819 | 0.0001387 |
| 1  | rs942837   | 214165817 | USH2A         | intron 34               | q41    | CT | 0.8333 | 1.319 | 0.0001393 |
| 2  | rs13414802 | 210440931 | C2orf21       | 71415 base downstream   | q34    | AG | 0.8644 | 0.739 | 0.0001405 |
| 1  | rs513746   | 214169419 | USH2A         | intron 34               | q41    | CT | 0.8336 | 1.318 | 0.0001411 |
| 1  | rs517577   | 214169893 | USH2A         | intron 34               | q41    | AG | 0.1664 | 0.759 | 0.0001414 |
| 7  | rs1919945  | 52978744  | DKFZp564N247z | 92098 base upstream     | p12.1  | CT | 0.8061 | 0.766 | 0.0001418 |
| 1  | rs662355   | 214170400 | USH2A         | intron 34               | q41    | CG | 0.8339 | 1.318 | 0.000143  |
| 17 | rs7222776  | 787555    | NXN           | intron 7                | p13.3  | GT | 0.6938 | 0.806 | 0.0001433 |
| 1  | rs647908   | 214171349 | USH2A         | intron 34               | q41    | AC | 0.1659 | 0.759 | 0.0001449 |
| 1  | rs646576   | 214171639 | USH2A         | intron 34               | q41    | AG | 0.1658 | 0.759 | 0.0001454 |
| 5  | rs13156277 | 2517988   | IRX2          | 281891 base upstream    | p15.33 | CT | 0.6093 | 1.252 | 0.000146  |
| 10 | rs503598   | 30536131  | PAPD1         | 105633 base upstream    | p11.23 | AG | 0.6439 | 0.814 | 0.0001469 |
| 10 | rs4918918  | 97112231  | SORBS1        | intron 11               | q23.33 | CT | 0.6364 | 0.814 | 0.000149  |
| 15 | rs17628504 | 51322236  | WDR72         | 270993 base upstream    | q21.3  | AG | 0.8454 | 0.754 | 0.000149  |
| 11 | rs369845   | 115308412 | CADM1         | 427961 base downstream  | q23.2  | CT | 0.2816 | 1.249 | 0.0001497 |
| 1  | rs1660383  | 212355520 | PROX1         | 79137 base downstream   | q41    | AG | 0.0334 | 1.777 | 0.0001509 |
| 5  | rs13175490 | 2517882   | IRX2          | 281997 base upstream    | p15.33 | AG | 0.6094 | 1.251 | 0.0001512 |
| 1  | rs492474   | 214178831 | USH2A         | intron 35               | q41    | GT | 0.1653 | 0.76  | 0.0001514 |
| 4  | rs16895848 | 9887927   | WDR1          | 160256 base downstream  | p16.1  | AT | 0.006  | 3.923 | 0.0001524 |
| 18 | rs2004027  | 64693088  | CCDC102B      | intron 7                | q22.1  | AT | 0.2745 | 1.244 | 0.000153  |
| 2  | rs11684281 | 123098501 | TSN           | 856605 base downstream  | q14.3  | GT | 0.3593 | 0.811 | 0.0001538 |
| 18 | rs2051301  | 64691203  | CCDC102B      | intron 6                | q22.1  | CT | 0.2747 | 1.244 | 0.0001538 |
| 18 | rs2051303  | 64690810  | CCDC102B      | intron 6                | q22.1  | AT | 0.2748 | 1.244 | 0.0001541 |
| 12 | rs6488934  | 123620722 | NCOR2         | 34620 base downstream   | q24.31 | AT | 0.053  | 1.559 | 0.0001544 |
| 18 | rs4797242  | 6397483   | L3MBTL4       | intron 19               | p11.31 | AC | 0.2891 | 0.799 | 0.0001545 |
| 8  | rs1158934  | 135101424 | ST3GAL1       | 448080 base downstream  | q24.22 | AG | 0.439  | 0.819 | 0.0001555 |
| 2  | rs2418570  | 123069387 | TSN           | 827491 base downstream  | q14.3  | AG | 0.3387 | 0.808 | 0.0001585 |
| 4  | rs13105776 | 58828037  | IGFBP7        | 1156741 base downstream | q12    | CT | 0.7761 | 1.284 | 0.0001593 |
| 6  | rs3123337  | 99005968  | POU3F2        | 383332 base upstream    | q16.2  | CT | 0.0454 | 0.571 | 0.0001627 |
| 5  | rs1309534  | 64338340  | SDCCAG10      | intron 13               | q12.3  | AG | 0.1766 | 1.311 | 0.000164  |
| 22 | rs9610223  | 33870650  | RAXLX         | 57272 base downstream   | q12.3  | CT | 0.2621 | 0.796 | 0.0001643 |

|    |            |           |           |                        |        |    |        |       |           |
|----|------------|-----------|-----------|------------------------|--------|----|--------|-------|-----------|
| 2  | rs10171928 | 123068787 | TSN       | 826891 base downstream | q14.3  | CT | 0.3382 | 0.808 | 0.0001655 |
| 21 | rs2823722  | 16557827  | C21orf34  | intron 4               | q21.1  | CT | 0.609  | 0.802 | 0.0001656 |
| 2  | rs1595755  | 123087692 | TSN       | 845796 base downstream | q14.3  | CT | 0.6408 | 1.23  | 0.0001673 |
| 21 | rs238946   | 16544957  | C21orf34  | intron 4               | q21.1  | AG | 0.605  | 0.806 | 0.0001675 |
| 2  | rs2043940  | 123083369 | TSN       | 841473 base downstream | q14.3  | CT | 0.6408 | 1.23  | 0.0001676 |
| 10 | rs2488003  | 30507811  | KIAA1462  | 131005 base downstream | p11.23 | AG | 0.6411 | 0.816 | 0.0001683 |
| 2  | rs6753885  | 123075396 | TSN       | 833500 base downstream | q14.3  | AT | 0.6408 | 1.23  | 0.0001683 |
| 20 | rs6066696  | 46386093  | PREX1     | 288106 base upstream   | q13.13 | AT | 0.3237 | 0.803 | 0.0001686 |
| 6  | rs12663706 | 25256945  | LRRC16    | 130681 base upstream   | p22.2  | CG | 0.7816 | 1.295 | 0.0001699 |
| 8  | rs13272401 | 12770433  | C8orf79   | 77120 base upstream    | p22    | GT | 0.0196 | 2.135 | 0.0001715 |
| 3  | rs11928551 | 24678903  | THRB      | 167586 base downstream | p24.2  | GT | 0.52   | 1.218 | 0.0001728 |
| 3  | rs9812637  | 24680225  | THRB      | 168908 base downstream | p24.2  | AG | 0.48   | 0.821 | 0.0001736 |
| 3  | rs6794974  | 106404720 | ALCAM     | 163682 base upstream   | q13.11 | AG | 0.1946 | 0.777 | 0.0001744 |
| 1  | rs4951084  | 202873597 | LRRN5     | intron 1               | q32.1  | CG | 0.2748 | 1.27  | 0.0001748 |
| 21 | rs2823717  | 16555717  | C21orf34  | intron 4               | q21.1  | AT | 0.6041 | 0.818 | 0.0001755 |
| 1  | rs772713   | 214179910 | USH2A     | intron 35              | q41    | AC | 0.8344 | 1.314 | 0.0001757 |
| 16 | rs8054432  | 6838730   | A2BP1     | intron 3               | p13.2  | CT | 0.692  | 1.244 | 0.0001758 |
| 3  | rs9843745  | 24661552  | THRB      | 150235 base downstream | p24.2  | AG | 0.4786 | 0.821 | 0.0001766 |
| 2  | rs2698029  | 51633763  | NRXN1     | 520585 base downstream | p16.3  | GT | 0.5489 | 0.821 | 0.0001767 |
| 16 | rs8054809  | 6838963   | A2BP1     | intron 3               | p13.2  | CG | 0.692  | 1.245 | 0.0001771 |
| 3  | rs9817530  | 24656887  | THRB      | 145570 base downstream | p24.2  | AG | 0.4785 | 0.821 | 0.0001773 |
| 11 | rs11042997 | 10857160  | EIF4G2    | 70002 base downstream  | p15.3  | AC | 0.1366 | 0.728 | 0.0001773 |
| 21 | rs2823721  | 16557703  | C21orf34  | intron 4               | q21.1  | AG | 0.3938 | 1.232 | 0.0001774 |
| 21 | rs2823716  | 16555664  | C21orf34  | intron 4               | q21.1  | AG | 0.6042 | 0.818 | 0.0001782 |
| 2  | rs2715079  | 51634538  | NRXN1     | 521360 base downstream | p16.3  | AG | 0.451  | 1.217 | 0.0001784 |
| 3  | rs1568420  | 106400088 | ALCAM     | 168314 base upstream   | q13.11 | CT | 0.1946 | 0.777 | 0.0001789 |
| 8  | rs7462232  | 54386673  | OPRK1     | 59926 base downstream  | q11.23 | AG | 0.8842 | 1.388 | 0.00018   |
| 21 | rs238964   | 16557408  | C21orf34  | intron 4               | q21.1  | CG | 0.605  | 0.815 | 0.000182  |
| 21 | rs1492957  | 16555965  | C21orf34  | intron 4               | q21.1  | CT | 0.3959 | 1.223 | 0.0001822 |
| 21 | rs4337554  | 40078450  | LOC150084 | intron 5               | q22.2  | AG | 0.665  | 0.81  | 0.0001825 |
| 21 | rs2823718  | 16556290  | C21orf34  | intron 4               | q21.1  | AG | 0.3952 | 1.223 | 0.0001834 |
| 21 | rs6517695  | 16557390  | C21orf34  | intron 4               | q21.1  | GT | 0.3953 | 1.225 | 0.0001843 |
| 2  | rs11124131 | 106716044 | ST6GAL2   | 73495 base upstream    | q12.3  | AC | 0.6886 | 1.244 | 0.000185  |
| 21 | rs2823720  | 16556577  | C21orf34  | intron 4               | q21.1  | AC | 0.6043 | 0.817 | 0.0001857 |
| 5  | rs7730020  | 40693709  | PTGER4    | 22079 base upstream    | p13.1  | CT | 0.6573 | 1.232 | 0.0001859 |
| 4  | rs11248073 | 1707300   | TACC3     | EXON 8                 | p16.3  | CT | 0.6523 | 0.799 | 0.0001864 |
| 2  | rs13393451 | 106707725 | ST6GAL2   | 81814 base upstream    | q12.3  | AG | 0.3114 | 0.803 | 0.0001874 |

|    |            |           |          |                        |        |    |        |       |           |
|----|------------|-----------|----------|------------------------|--------|----|--------|-------|-----------|
| 2  | rs13391600 | 106709532 | ST6GAL2  | 80007 base upstream    | q12.3  | CT | 0.3114 | 0.803 | 0.0001874 |
| 4  | rs17148361 | 71114351  | APIN     | 9470 base downstream   | q13.3  | CT | 0.869  | 1.335 | 0.0001875 |
| 2  | rs898457   | 106705890 | ST6GAL2  | 83649 base upstream    | q12.3  | AG | 0.6886 | 1.245 | 0.0001877 |
| 2  | rs898456   | 106706061 | ST6GAL2  | 83478 base upstream    | q12.3  | AG | 0.3114 | 0.803 | 0.0001877 |
| 4  | rs1530588  | 1712577   | TACC3    | intron 13              | p16.3  | AG | 0.3494 | 1.258 | 0.0001882 |
| 21 | rs4465860  | 16555455  | C21orf34 | intron 4               | q21.1  | CT | 0.6042 | 0.818 | 0.0001885 |
| 5  | rs11739531 | 40665104  | PTGER4   | 50684 base upstream    | p13.1  | CT | 0.3425 | 0.812 | 0.0001901 |
| 5  | rs16869212 | 16935090  | MYO10    | intron 40              | p15.1  | AG | 0.0667 | 1.455 | 0.0001901 |
| 2  | rs1006472  | 106695948 | ST6GAL2  | 93591 base upstream    | q12.2  | AC | 0.6886 | 1.245 | 0.0001902 |
| 2  | rs2698028  | 51635357  | NRXN1    | 522179 base downstream | p16.3  | CT | 0.549  | 0.822 | 0.0001902 |
| 18 | rs12961587 | 6394347   | L3MBTL4  | intron 19              | p11.31 | AG | 0.545  | 1.23  | 0.0001904 |
| 5  | rs7716982  | 40682317  | PTGER4   | 33471 base upstream    | p13.1  | GT | 0.3426 | 0.812 | 0.0001906 |
| 3  | rs2918217  | 117029070 | LSAMP    | intron 1               | q13.31 | CT | 0.8657 | 0.755 | 0.0001916 |
| 11 | rs11042998 | 10857488  | EIF4G2   | 70330 base downstream  | p15.3  | GT | 0.1372 | 0.732 | 0.0001923 |
| 21 | rs2251006  | 16555396  | C21orf34 | intron 4               | q21.1  | CT | 0.3957 | 1.222 | 0.0001925 |
| 2  | rs13001767 | 51625919  | NRXN1    | 512741 base downstream | p16.3  | GT | 0.5323 | 0.821 | 0.0001927 |
| 1  | rs1660382  | 212355741 | PROX1    | 79358 base downstream  | q41    | AG | 0.0322 | 1.726 | 0.000193  |
| 11 | rs745231   | 11073168  | GALNTL4  | 175833 base upstream   | p15.3  | CT | 0.5474 | 1.219 | 0.0001948 |
| 2  | rs1304771  | 123061530 | TSN      | 819634 base downstream | q14.3  | AG | 0.6635 | 1.233 | 0.0001965 |
| 1  | rs7512894  | 55469135  | USP24    | 15785 base downstream  | p32.3  | AG | 0.7906 | 0.782 | 0.0001969 |
| 2  | rs10864879 | 123058863 | TSN      | 816967 base downstream | q14.3  | CG | 0.6635 | 1.233 | 0.0001971 |
| 4  | rs798761   | 1700924   | TACC3    | intron 4               | p16.3  | AG | 0.3433 | 1.238 | 0.0001976 |
| 12 | rs7136505  | 82308633  | TMTC2    | 256439 base downstream | q21.31 | AG | 0.9678 | 0.566 | 0.000198  |
| 2  | rs984521   | 133209220 | NAP5     | intron 4               | q21.2  | AG | 0.3357 | 0.81  | 0.0001984 |
| 1  | rs11264432 | 154309539 | MEX3A    | EXON 1                 | q22    | AG | 0.5681 | 0.813 | 0.0001992 |
| 6  | rs6457109  | 30041240  | HCG9     | 9630 base upstream     | p21.33 | CT | 0.0635 | 1.522 | 0.0001995 |
| 4  | rs2306445  | 71098553  | APIN     | intron 4               | q13.3  | AG | 0.1309 | 0.75  | 0.0001999 |
| 5  | rs1309540  | 64329326  | SDCCAG10 | intron 13              | q12.3  | AG | 0.177  | 1.305 | 0.0002001 |
| 21 | rs2823713  | 16555037  | C21orf34 | intron 4               | q21.1  | AT | 0.3957 | 1.221 | 0.0002008 |
| 4  | rs2854917  | 1690348   | TMEM129  | intron 2               | p16.3  | CT | 0.3416 | 1.235 | 0.0002013 |
| 6  | rs9362322  | 87197144  | HTR1E    | 506984 base upstream   | q14.3  | AT | 0.1776 | 1.295 | 0.0002021 |
| 2  | rs1439838  | 123052210 | TSN      | 810314 base downstream | q14.3  | AT | 0.3369 | 0.811 | 0.0002022 |
| 4  | rs6824942  | 21227268  | KCNIP4   | intron 7               | p15.31 | CT | 0.4933 | 0.821 | 0.0002024 |
| 1  | rs241215   | 4503964   | AJAP1    | 111000 base upstream   | p36.32 | AT | 0.609  | 1.225 | 0.0002024 |
| 4  | rs6848248  | 21227279  | KCNIP4   | intron 7               | p15.31 | AG | 0.4933 | 0.821 | 0.0002027 |
| 11 | rs2403431  | 10858797  | EIF4G2   | 71639 base downstream  | p15.3  | AC | 0.1376 | 0.735 | 0.0002028 |
| 4  | rs2854916  | 1691146   | TMEM129  | intron 2               | p16.3  | AG | 0.3416 | 1.235 | 0.0002035 |

|    |            |           |          |                         |        |    |        |       |           |
|----|------------|-----------|----------|-------------------------|--------|----|--------|-------|-----------|
| 4  | rs13117892 | 21227551  | KCNIP4   | intron 7                | p15.31 | AT | 0.4932 | 0.821 | 0.0002035 |
| 3  | rs10933810 | 106415848 | ALCAM    | 152554 base upstream    | q13.11 | CT | 0.7986 | 1.284 | 0.0002035 |
| 4  | rs10000010 | 21227772  | KCNIP4   | intron 7                | p15.31 | CT | 0.4932 | 0.821 | 0.0002037 |
| 1  | rs694935   | 4503184   | AJAP1    | 111780 base upstream    | p36.32 | AT | 0.609  | 1.225 | 0.0002042 |
| 2  | rs2272315  | 123050723 | TSN      | 808827 base downstream  | q14.3  | AG | 0.3371 | 0.811 | 0.0002044 |
| 10 | rs7900095  | 97109039  | SORBS1   | intron 11               | q23.33 | CT | 0.6196 | 0.819 | 0.0002046 |
| 10 | rs7079293  | 97109583  | SORBS1   | intron 11               | q23.33 | CT | 0.6196 | 0.819 | 0.000205  |
| 10 | rs2798920  | 30515649  | PAPD1    | 126115 base upstream    | p11.23 | AG | 0.3598 | 1.221 | 0.0002052 |
| 20 | rs6116726  | 5209399   | PROKR2   | 21287 base upstream     | p12.3  | CT | 0.609  | 1.229 | 0.0002056 |
| 21 | rs2823712  | 16554963  | C21orf34 | intron 4                | q21.1  | AG | 0.3957 | 1.221 | 0.0002063 |
| 12 | rs10506083 | 32214624  | BICD1    | intron 1                | p11.21 | AG | 0.5852 | 1.239 | 0.0002072 |
| 10 | rs2795863  | 30540273  | PAPD1    | 101491 base upstream    | p11.23 | AG | 0.6443 | 0.817 | 0.0002076 |
| 4  | rs743569   | 1689418   | TMEM129  | intron 1                | p16.3  | GT | 0.3414 | 1.234 | 0.0002077 |
| 10 | rs2798906  | 30514592  | PAPD1    | 127172 base upstream    | p11.23 | AG | 0.3596 | 1.222 | 0.0002097 |
| 4  | rs17148330 | 71093585  | APIN     | 3247 base upstream      | q13.3  | AG | 0.1309 | 0.751 | 0.0002097 |
| 1  | rs1660381  | 212356390 | PROX1    | 80007 base downstream   | q41    | CT | 0.0318 | 1.711 | 0.0002102 |
| 10 | rs2795859  | 30514493  | PAPD1    | 127271 base upstream    | p11.23 | CT | 0.6405 | 0.819 | 0.0002107 |
| 9  | rs1467773  | 77922888  | PCSK5    | intron 9                | q21.13 | AG | 0.8623 | 1.359 | 0.0002115 |
| 4  | rs17148328 | 71088800  | APIN     | 8032 base upstream      | q13.3  | CT | 0.1309 | 0.751 | 0.0002146 |
| 17 | rs4793818  | 51868565  | ANKFN1   | intron 7                | q22    | GT | 0.2388 | 1.256 | 0.0002149 |
| 2  | rs1405604  | 123070752 | TSN      | 828856 base downstream  | q14.3  | AG | 0.3576 | 0.815 | 0.000215  |
| 5  | rs325538   | 104081546 | NUDT12   | 1155157 base downstream | q21.2  | AG | 0.8233 | 0.772 | 0.0002152 |
| 14 | rs7160795  | 82451964  | SEL1L    | 1382078 base downstream | q31.1  | CT | 0.7323 | 0.796 | 0.0002155 |
| 3  | rs11129156 | 24635868  | THRB     | 124551 base downstream  | p24.2  | AG | 0.7023 | 1.251 | 0.0002172 |
| 11 | rs771377   | 10824525  | EIF4G2   | 37367 base downstream   | p15.3  | CG | 0.9253 | 1.452 | 0.0002175 |
| 12 | rs17010837 | 82371672  | TMTC2    | 319478 base downstream  | q21.31 | AG | 0.032  | 1.76  | 0.000218  |
| 2  | rs16844213 | 210787411 | ACADL    | intron 7                | q34    | CT | 0.102  | 1.366 | 0.0002184 |
| 2  | rs13415601 | 210788369 | ACADL    | intron 7                | q34    | AT | 0.102  | 1.366 | 0.0002186 |
| 2  | rs13009758 | 210810084 | ACADL    | 11692 base downstream   | q34    | CT | 0.102  | 1.366 | 0.0002193 |
| 2  | rs1554006  | 111320584 | ACOXL    | intron 10               | q13    | AG | 0.3063 | 1.239 | 0.0002196 |
| 11 | rs2687489  | 10826485  | EIF4G2   | 39327 base downstream   | p15.3  | AG | 0.9253 | 1.451 | 0.0002199 |
| 2  | rs10210955 | 111315753 | ACOXL    | intron 10               | q13    | CG | 0.4815 | 0.824 | 0.00022   |
| 15 | rs12442241 | 51195790  | ONECUT1  | 326289 base downstream  | q21.3  | AT | 0.8322 | 0.762 | 0.0002203 |
| 2  | rs1509571  | 210781793 | ACADL    | intron 6                | q34    | CT | 0.102  | 1.366 | 0.0002214 |
| 5  | rs9312996  | 2527518   | IRX2     | 272361 base upstream    | p15.33 | CG | 0.6846 | 1.251 | 0.0002223 |
| 2  | rs1509572  | 210781582 | ACADL    | intron 6                | q34    | AT | 0.102  | 1.365 | 0.0002226 |
| 4  | rs1825033  | 71136589  | C4orf7   | 1034 base downstream    | q13.3  | AG | 0.1309 | 0.752 | 0.0002227 |

|    |            |           |          |                        |        |    |        |       |           |
|----|------------|-----------|----------|------------------------|--------|----|--------|-------|-----------|
| 2  | rs263666   | 210816047 | ACADL    | 17655 base downstream  | q34    | AG | 0.8981 | 0.732 | 0.0002231 |
| 2  | rs11563162 | 51632112  | NRXN1    | 518934 base downstream | p16.3  | AG | 0.4933 | 1.225 | 0.0002233 |
| 2  | rs1509568  | 210777256 | ACADL    | intron 4               | q34    | CT | 0.898  | 0.732 | 0.0002235 |
| 2  | rs6760874  | 210826755 | ACADL    | 28363 base downstream  | q34    | CT | 0.8981 | 0.732 | 0.0002237 |
| 11 | rs7925687  | 10829758  | EIF4G2   | 42600 base downstream  | p15.3  | CT | 0.0747 | 0.689 | 0.0002241 |
| 3  | rs4075988  | 24755270  | THRB     | 243953 base downstream | p24.2  | AG | 0.8474 | 1.328 | 0.0002245 |
| 21 | rs2823692  | 16548642  | C21orf34 | intron 4               | q21.1  | AC | 0.609  | 0.814 | 0.0002252 |
| 4  | rs3775747  | 71147532  | CSN3     | intron 2               | q13.3  | CT | 0.1301 | 0.744 | 0.0002252 |
| 17 | rs4794639  | 51825310  | ANKFN1   | intron 7               | q22    | AG | 0.7525 | 0.797 | 0.0002263 |
| 1  | rs1660380  | 212356402 | PROX1    | 80019 base downstream  | q41    | AG | 0.9686 | 0.59  | 0.0002265 |
| 1  | rs1660378  | 212356865 | PROX1    | 80482 base downstream  | q41    | CT | 0.0313 | 1.696 | 0.0002268 |
| 4  | rs1817460  | 71136840  | C4orf7   | 1285 base downstream   | q13.3  | AT | 0.1309 | 0.752 | 0.000227  |
| 2  | rs263680   | 210775646 | ACADL    | intron 3               | q34    | AG | 0.102  | 1.365 | 0.0002271 |
| 21 | rs2823710  | 16554494  | C21orf34 | intron 4               | q21.1  | AG | 0.6044 | 0.82  | 0.0002279 |
| 2  | rs263681   | 210771597 | ACADL    | intron 3               | q34    | CG | 0.102  | 1.365 | 0.0002279 |
| 2  | rs2405635  | 128353695 | MGC4268  | intron 6               | q14.3  | AG | 0.5892 | 0.822 | 0.0002282 |
| 20 | rs6116721  | 5203078   | PROKR2   | 27608 base upstream    | p12.3  | GT | 0.3915 | 0.815 | 0.0002285 |
| 16 | rs13330100 | 7338030   | A2BP1    | intron 4               | p13.2  | CT | 0.8864 | 0.747 | 0.0002297 |
| 7  | rs11979834 | 52115801  | COBL     | 763811 base downstream | p12.1  | AG | 0.2274 | 0.794 | 0.0002298 |
| 2  | rs2715081  | 51629318  | NRXN1    | 516140 base downstream | p16.3  | CT | 0.531  | 0.824 | 0.0002302 |
| 7  | rs6965611  | 52134879  | COBL     | 782889 base downstream | p12.1  | GT | 0.2309 | 0.779 | 0.0002306 |
| 5  | rs13178969 | 64299723  | SDCCAG10 | intron 11              | q12.3  | CT | 0.1774 | 1.3   | 0.0002309 |
| 1  | rs1440619  | 212357674 | PROX1    | 81291 base downstream  | q41    | AG | 0.0297 | 1.736 | 0.0002312 |
| 11 | rs2232928  | 10831170  | EIF4G2   | 44012 base downstream  | p15.3  | AG | 0.9253 | 1.45  | 0.0002313 |
| 1  | rs1660377  | 212356924 | PROX1    | 80541 base downstream  | q41    | AT | 0.0313 | 1.694 | 0.000232  |
| 2  | rs7566163  | 128352457 | MGC4268  | intron 6               | q14.3  | AG | 0.4107 | 1.216 | 0.0002324 |
| 1  | rs1795037  | 212357165 | PROX1    | 80782 base downstream  | q41    | AG | 0.0313 | 1.694 | 0.0002324 |
| 2  | rs6716836  | 210826582 | ACADL    | 28190 base downstream  | q34    | AG | 0.108  | 1.366 | 0.0002329 |
| 7  | rs2953422  | 52131614  | COBL     | 779624 base downstream | p12.1  | AG | 0.514  | 0.82  | 0.0002344 |
| 1  | rs2556     | 206126982 | CD34     | EXON 1                 | q32.2  | AG | 0.0804 | 0.701 | 0.0002354 |
| 9  | rs2185227  | 77923214  | PCSK5    | intron 9               | q21.13 | AG | 0.8631 | 1.352 | 0.0002357 |
| 2  | rs6548032  | 30841879  | CAPN13   | intron 18              | p23.1  | AG | 0.3163 | 1.231 | 0.0002359 |
| 2  | rs1155845  | 210762844 | ACADL    | intron 1               | q34    | CT | 0.1019 | 1.364 | 0.000236  |
| 1  | rs542688   | 4500481   | AJAP1    | 114483 base upstream   | p36.32 | CG | 0.3915 | 0.817 | 0.000237  |
| 10 | rs2798907  | 30512779  | PAPD1    | 128985 base upstream   | p11.23 | AG | 0.64   | 0.819 | 0.0002375 |
| 2  | rs4558528  | 210842791 | MYL1     | 20322 base upstream    | q34    | AT | 0.1018 | 1.367 | 0.0002378 |
| 17 | rs7220133  | 51873068  | ANKFN1   | intron 8               | q22    | CT | 0.2384 | 1.253 | 0.000238  |

|    |            |           |          |                         |        |    |        |       |           |
|----|------------|-----------|----------|-------------------------|--------|----|--------|-------|-----------|
| 1  | rs498911   | 214171603 | USH2A    | intron 34               | q41    | AC | 0.1585 | 0.76  | 0.0002382 |
| 2  | rs1396830  | 210844857 | MYL1     | 18256 base upstream     | q34    | AG | 0.8982 | 0.732 | 0.0002384 |
| 21 | rs2823709  | 16554235  | C21orf34 | intron 4                | q21.1  | AG | 0.3955 | 1.218 | 0.0002385 |
| 21 | rs2823725  | 16558862  | C21orf34 | intron 4                | q21.1  | AT | 0.384  | 1.247 | 0.0002388 |
| 1  | rs12568811 | 212358567 | PROX1    | 82184 base downstream   | q41    | AG | 0.9706 | 0.575 | 0.0002395 |
| 2  | rs10445851 | 123052783 | TSN      | 810887 base downstream  | q14.3  | GT | 0.6435 | 1.225 | 0.0002413 |
| 1  | rs592726   | 4499103   | AJAP1    | 115861 base upstream    | p36.32 | CT | 0.3916 | 0.817 | 0.0002413 |
| 22 | rs4821368  | 33864933  | RAXLX    | 51555 base downstream   | q12.3  | CG | 0.7462 | 1.264 | 0.000243  |
| 15 | rs4887337  | 86294466  | NTRK3    | intron 6                | q25.3  | AC | 0.1054 | 1.369 | 0.0002435 |
| 10 | rs2482828  | 30500212  | KIAA1462 | 123406 base downstream  | p11.23 | AG | 0.3581 | 1.225 | 0.0002437 |
| 21 | rs9982468  | 32336948  | HUNK     | 38701 base downstream   | q22.11 | CT | 0.8505 | 1.324 | 0.0002437 |
| 2  | rs1396831  | 210844923 | MYL1     | 18190 base upstream     | q34    | AT | 0.1017 | 1.367 | 0.0002439 |
| 13 | rs7325881  | 89560729  | GPC5     | 1288158 base upstream   | q31.3  | CT | 0.1993 | 0.772 | 0.0002447 |
| 2  | rs11563043 | 51630745  | NRXN1    | 517567 base downstream  | p16.3  | CG | 0.5453 | 0.825 | 0.0002451 |
| 4  | rs4583737  | 154181234 | KIAA1727 | 60936 base downstream   | q31.3  | AC | 0.319  | 1.224 | 0.0002453 |
| 21 | rs4381854  | 16553692  | C21orf34 | intron 4                | q21.1  | CT | 0.6045 | 0.821 | 0.0002455 |
| 18 | rs9948116  | 64676889  | CCDC102B | intron 6                | q22.1  | AG | 0.7248 | 0.809 | 0.0002457 |
| 7  | rs6944484  | 157012904 | PTPRN2   | 11611 base upstream     | q36.3  | AC | 0.8832 | 1.364 | 0.0002464 |
| 2  | rs2715084  | 51632158  | NRXN1    | 518980 base downstream  | p16.3  | CT | 0.4546 | 1.212 | 0.0002471 |
| 8  | rs1457473  | 135194786 | ZNF406   | 364427 base upstream    | q24.22 | AG | 0.4644 | 1.211 | 0.0002475 |
| 5  | rs17065434 | 164985118 | MAT2B    | 2106215 base downstream | q34    | CT | 0.7715 | 0.793 | 0.0002479 |
| 2  | rs999492   | 123048824 | TSN      | 806928 base downstream  | q14.3  | AC | 0.3572 | 0.817 | 0.0002482 |
| 4  | rs2406144  | 154185069 | KIAA1727 | 64771 base downstream   | q31.3  | CT | 0.319  | 1.224 | 0.0002486 |
| 18 | rs12969887 | 6392671   | L3MBTL4  | intron 19               | p11.31 | AC | 0.5391 | 1.224 | 0.0002486 |
| 2  | rs6752217  | 210419671 | C2orf21  | 50155 base downstream   | q34    | GT | 0.8891 | 0.734 | 0.0002489 |
| 4  | rs908535   | 154187592 | KIAA1727 | 67294 base downstream   | q31.3  | AG | 0.6812 | 0.817 | 0.0002489 |
| 11 | rs2232919  | 10832929  | EIF4G2   | 45771 base downstream   | p15.3  | CT | 0.0748 | 0.69  | 0.0002494 |
| 13 | rs9588875  | 89566249  | GPC5     | 1282638 base upstream   | q31.3  | AT | 0.1992 | 0.772 | 0.0002501 |
| 11 | rs2232918  | 10833019  | EIF4G2   | 45861 base downstream   | p15.3  | AG | 0.0748 | 0.69  | 0.0002507 |
| 13 | rs9805500  | 89566889  | GPC5     | 1281998 base upstream   | q31.3  | CT | 0.8008 | 1.295 | 0.0002512 |
| 21 | rs9974134  | 32329234  | HUNK     | 30987 base downstream   | q22.11 | AC | 0.1494 | 0.756 | 0.0002512 |
| 2  | rs1527253  | 123048317 | TSN      | 806421 base downstream  | q14.3  | CT | 0.6426 | 1.224 | 0.0002514 |
| 2  | rs2715086  | 51632225  | NRXN1    | 519047 base downstream  | p16.3  | AT | 0.4544 | 1.212 | 0.0002517 |
| 2  | rs7574002  | 172832429 | DLX2     | 156705 base downstream  | q31.1  | CT | 0.3525 | 1.221 | 0.000252  |
| 2  | rs10195812 | 123046194 | TSN      | 804298 base downstream  | q14.3  | CT | 0.3574 | 0.817 | 0.0002526 |
| 2  | rs13425998 | 123045361 | TSN      | 803465 base downstream  | q14.3  | CT | 0.6425 | 1.224 | 0.0002535 |
| 11 | rs2291840  | 9123690   | RAB6IP1  | intron 6                | p15.4  | AC | 0.1693 | 1.28  | 0.0002539 |

|    |            |           |          |                         |        |    |        |       |           |
|----|------------|-----------|----------|-------------------------|--------|----|--------|-------|-----------|
| 21 | rs1389071  | 16553672  | C21orf34 | intron 4                | q21.1  | AT | 0.3955 | 1.217 | 0.0002542 |
| 3  | rs6770162  | 24686017  | THRB     | 174700 base downstream  | p24.2  | AG | 0.5023 | 0.824 | 0.0002543 |
| 8  | rs16905053 | 135108870 | ZNF406   | 450343 base upstream    | q24.22 | AT | 0.137  | 0.751 | 0.0002546 |
| 8  | rs16905054 | 135109347 | ZNF406   | 449866 base upstream    | q24.22 | AG | 0.863  | 1.331 | 0.0002549 |
| 4  | rs17029545 | 154191355 | KIAA1727 | 71057 base downstream   | q31.3  | CT | 0.3185 | 1.223 | 0.000255  |
| 17 | rs980080   | 51864068  | ANKFN1   | intron 7                | q22    | CT | 0.7615 | 0.799 | 0.0002566 |
| 2  | rs2715088  | 51632332  | NRXN1    | 519154 base downstream  | p16.3  | CT | 0.4542 | 1.212 | 0.0002574 |
| 4  | rs2412887  | 58862866  | IGFBP7   | 1191570 base downstream | q12    | AG | 0.7211 | 1.237 | 0.0002577 |
| 2  | rs1568213  | 98798495  | MGC42367 | intron 3                | q11.2  | AT | 0.3719 | 1.24  | 0.0002577 |
| 2  | rs2715089  | 51632624  | NRXN1    | 519446 base downstream  | p16.3  | AC | 0.4541 | 1.212 | 0.0002578 |
| 3  | rs2972491  | 116985171 | LSAMP    | 26668 base upstream     | q13.31 | AG | 0.8687 | 0.738 | 0.000258  |
| 5  | rs11134531 | 168144746 | SLIT3    | intron 24               | q35.1  | AG | 0.5645 | 0.809 | 0.0002581 |
| 17 | rs10852984 | 51864305  | ANKFN1   | intron 7                | q22    | AG | 0.2384 | 1.252 | 0.0002583 |
| 6  | rs2844833  | 29810185  | HLA-F    | 7903 base downstream    | p22.1  | CG | 0.8571 | 0.758 | 0.0002589 |
| 10 | rs11015025 | 26606462  | GAD2     | intron 11               | p12.1  | CT | 0.9003 | 1.381 | 0.0002589 |
| 1  | rs608492   | 4497861   | AJAP1    | 117103 base upstream    | p36.32 | CG | 0.6082 | 1.223 | 0.0002592 |
| 1  | rs4654974  | 21826881  | RAP1GA1  | intron 23               | p36.12 | CT | 0.3787 | 0.813 | 0.0002593 |
| 5  | rs3099592  | 2563027   | IRX2     | 236852 base upstream    | p15.33 | AG | 0.5632 | 1.224 | 0.0002594 |
| 2  | rs9288414  | 210412445 | C2orf21  | 42929 base downstream   | q34    | AC | 0.1089 | 1.368 | 0.0002596 |
| 2  | rs7574225  | 172832483 | DLX2     | 156759 base downstream  | q31.1  | AG | 0.6478 | 0.818 | 0.0002605 |
| 1  | rs9426770  | 21828331  | RAP1GA1  | intron 23               | p36.12 | CG | 0.3787 | 0.813 | 0.0002605 |
| 2  | rs6754923  | 30855634  | CAPN13   | intron 21               | p23.1  | CG | 0.3978 | 1.215 | 0.0002609 |
| 2  | rs13028068 | 210418651 | C2orf21  | 49135 base downstream   | q34    | GT | 0.1107 | 1.36  | 0.0002614 |
| 5  | rs10055939 | 2530430   | IRX2     | 269449 base upstream    | p15.33 | GT | 0.6923 | 1.245 | 0.0002615 |
| 4  | rs2140072  | 58863520  | IGFBP7   | 1192224 base downstream | q12    | AG | 0.7211 | 1.236 | 0.0002623 |
| 3  | rs4131483  | 24666496  | THRB     | 155179 base downstream  | p24.2  | AT | 0.5275 | 1.213 | 0.0002624 |
| 7  | rs221238   | 157015643 | PTPRN2   | 8872 base upstream      | q36.3  | CT | 0.1165 | 0.735 | 0.0002627 |
| 2  | rs6759289  | 123043417 | TSN      | 801521 base downstream  | q14.3  | AC | 0.3393 | 0.815 | 0.0002629 |
| 1  | rs11588634 | 150047310 | RORC     | intron 1                | q21.3  | AT | 0.1325 | 0.724 | 0.0002635 |
| 7  | rs9690478  | 52133795  | COBL     | 781805 base downstream  | p12.1  | CG | 0.2224 | 0.78  | 0.0002636 |
| 4  | rs13148519 | 58861907  | IGFBP7   | 1190611 base downstream | q12    | AG | 0.2789 | 0.809 | 0.0002637 |
| 2  | rs10178425 | 210413138 | C2orf21  | 43622 base downstream   | q34    | GT | 0.8906 | 0.733 | 0.0002641 |
| 2  | rs12386218 | 210418038 | C2orf21  | 48522 base downstream   | q34    | CG | 0.8893 | 0.735 | 0.0002648 |
| 21 | rs1389073  | 16553507  | C21orf34 | intron 4                | q21.1  | GT | 0.6046 | 0.822 | 0.0002651 |
| 2  | rs7581875  | 123038464 | TSN      | 796568 base downstream  | q14.3  | CT | 0.3393 | 0.815 | 0.0002652 |
| 2  | rs1527255  | 123038857 | TSN      | 796961 base downstream  | q14.3  | AC | 0.6607 | 1.227 | 0.0002652 |
| 2  | rs766757   | 123037185 | TSN      | 795289 base downstream  | q14.3  | CT | 0.3393 | 0.815 | 0.0002652 |

|    |            |           |          |                         |        |    |        |       |           |
|----|------------|-----------|----------|-------------------------|--------|----|--------|-------|-----------|
| 2  | rs6541834  | 123041003 | TSN      | 799107 base downstream  | q14.3  | GT | 0.3393 | 0.815 | 0.0002653 |
| 2  | rs11122916 | 123042613 | TSN      | 800717 base downstream  | q14.3  | CT | 0.3393 | 0.815 | 0.0002653 |
| 4  | rs11933359 | 58866156  | IGFBP7   | 1194860 base downstream | q12    | CT | 0.2789 | 0.809 | 0.0002657 |
| 17 | rs7213627  | 51862430  | ANKFN1   | intron 7                | q22    | GT | 0.7619 | 0.799 | 0.0002659 |
| 1  | rs11588258 | 150047352 | RORC     | intron 1                | q21.3  | AT | 0.8676 | 1.381 | 0.0002659 |
| 2  | rs4953986  | 133199169 | NAP5     | intron 1                | q21.2  | CT | 0.6655 | 1.228 | 0.000266  |
| 6  | rs12181054 | 30192566  | TRIM31   | 3720 base downstream    | p21.33 | GT | 0.0533 | 1.537 | 0.0002662 |
| 21 | rs1389074  | 16553299  | C21orf34 | intron 4                | q21.1  | CT | 0.6046 | 0.822 | 0.0002667 |
| 4  | rs7690084  | 58860984  | IGFBP7   | 1189688 base downstream | q12    | AG | 0.2789 | 0.809 | 0.0002669 |
| 2  | rs2715077  | 51635788  | NRXN1    | 522610 base downstream  | p16.3  | AC | 0.4498 | 1.211 | 0.000267  |
| 1  | rs1795036  | 212358932 | PROX1    | 82549 base downstream   | q41    | AG | 0.0289 | 1.741 | 0.0002673 |
| 2  | rs17041560 | 30856523  | CAPN13   | intron 21               | p23.1  | AG | 0.6024 | 0.823 | 0.0002679 |
| 6  | rs7748376  | 6092415   | F13A1    | intron 1                | p25.1  | CG | 0.8373 | 0.772 | 0.0002682 |
| 11 | rs6484557  | 32220627  | RCN1     | 136974 base downstream  | p13    | AC | 0.3238 | 0.813 | 0.0002684 |
| 1  | rs9426674  | 21829826  | RAP1GA1  | intron 23               | p36.12 | CG | 0.3791 | 0.814 | 0.0002685 |
| 11 | rs2418587  | 32220968  | RCN1     | 137315 base downstream  | p13    | CT | 0.3238 | 0.813 | 0.0002691 |
| 3  | rs12639365 | 106423032 | ALCAM    | 145370 base upstream    | q13.11 | AT | 0.8191 | 1.312 | 0.0002694 |
| 2  | rs2698026  | 51636011  | NRXN1    | 522833 base downstream  | p16.3  | AG | 0.4498 | 1.211 | 0.0002698 |
| 22 | rs5755606  | 33869717  | RAXLX    | 56339 base downstream   | q12.3  | CT | 0.2557 | 0.803 | 0.0002699 |
| 4  | rs11945898 | 58866253  | IGFBP7   | 1194957 base downstream | q12    | CT | 0.7211 | 1.236 | 0.0002706 |
| 11 | rs1033627  | 32223435  | RCN1     | 139782 base downstream  | p13    | AG | 0.3238 | 0.813 | 0.0002709 |
| 1  | rs1795035  | 212358976 | PROX1    | 82593 base downstream   | q41    | CT | 0.9712 | 0.574 | 0.0002718 |
| 7  | rs221242   | 157017352 | PTPRN2   | 7163 base upstream      | q36.3  | AC | 0.1163 | 0.736 | 0.0002722 |
| 11 | rs1589596  | 10861334  | EIF4G2   | 74176 base downstream   | p15.3  | GT | 0.1397 | 0.75  | 0.0002724 |
| 2  | rs9308638  | 123036498 | TSN      | 794602 base downstream  | q14.3  | GT | 0.6607 | 1.226 | 0.0002729 |
| 10 | rs2488035  | 30497139  | KIAA1462 | 120333 base downstream  | p11.23 | AC | 0.358  | 1.225 | 0.0002739 |
| 5  | rs10058639 | 2532184   | IRX2     | 267695 base upstream    | p15.33 | AG | 0.3078 | 0.804 | 0.0002742 |
| 4  | rs2247341  | 1671115   | SLBP     | EXON 4                  | p16.3  | AG | 0.3404 | 1.225 | 0.0002747 |
| 2  | rs263675   | 210745449 | FLJ23861 | 1153 base downstream    | q34    | AG | 0.8984 | 0.734 | 0.0002753 |
| 2  | rs17021776 | 107791059 | SLC5A7   | 178367 base upstream    | q12.3  | CT | 0.0601 | 0.651 | 0.0002753 |
| 5  | rs10075636 | 2532446   | IRX2     | 267433 base upstream    | p15.33 | CT | 0.6921 | 1.244 | 0.0002758 |
| 2  | rs11692408 | 133201434 | NAP5     | intron 2                | q21.2  | AG | 0.3344 | 0.815 | 0.000276  |
| 1  | rs1795034  | 212359212 | PROX1    | 82829 base downstream   | q41    | CT | 0.0288 | 1.74  | 0.0002762 |
| 2  | rs10183605 | 128358837 | MGC4268  | EXON 8                  | q14.3  | CG | 0.575  | 0.815 | 0.0002765 |
| 2  | rs16843780 | 210417278 | C2orf21  | 47762 base downstream   | q34    | CG | 0.1105 | 1.357 | 0.0002766 |
| 7  | rs221250   | 157023027 | PTPRN2   | 1488 base upstream      | q36.3  | AG | 0.8836 | 1.359 | 0.0002768 |
| 5  | rs16869822 | 2532515   | IRX2     | 267364 base upstream    | p15.33 | AG | 0.6921 | 1.244 | 0.0002768 |



|    |            |           |          |                         |        |    |        |       |           |
|----|------------|-----------|----------|-------------------------|--------|----|--------|-------|-----------|
| 17 | rs2215759  | 51856204  | ANKFN1   | intron 7                | q22    | AG | 0.2387 | 1.251 | 0.0002773 |
| 11 | rs4396289  | 9273306   | TMEM41B  | intron 5                | p15.4  | CT | 0.1662 | 1.311 | 0.0002773 |
| 11 | rs1115704  | 32219434  | RCN1     | 135781 base downstream  | p13    | CT | 0.6761 | 1.229 | 0.0002775 |
| 2  | rs10188289 | 210416012 | C2orf21  | 46496 base downstream   | q34    | AG | 0.1105 | 1.357 | 0.0002781 |
| 2  | rs7573865  | 123035921 | TSN      | 794025 base downstream  | q14.3  | CG | 0.6607 | 1.226 | 0.0002782 |
| 6  | rs10947055 | 30201343  | TRIM40   | 11145 base upstream     | p21.33 | CT | 0.0531 | 1.534 | 0.0002793 |
| 11 | rs10835876 | 32218732  | RCN1     | 135079 base downstream  | p13    | AT | 0.324  | 0.814 | 0.0002797 |
| 2  | rs10490024 | 210415606 | C2orf21  | 46090 base downstream   | q34    | AG | 0.1105 | 1.357 | 0.0002798 |
| 2  | rs6754455  | 30861183  | CAPN13   | intron 21               | p23.1  | CT | 0.4    | 1.237 | 0.00028   |
| 2  | rs10178675 | 210413593 | C2orf21  | 44077 base downstream   | q34    | CG | 0.8895 | 0.737 | 0.0002805 |
| 2  | rs2090734  | 30860893  | CAPN13   | intron 21               | p23.1  | AT | 0.3996 | 1.234 | 0.0002809 |
| 8  | rs6586642  | 17655354  | MTUS1    | intron 13               | p22    | CT | 0.1839 | 0.767 | 0.000281  |
| 4  | rs3958122  | 1663729   | SLBP     | 595 base upstream       | p16.3  | CT | 0.6596 | 0.816 | 0.0002815 |
| 17 | rs7218500  | 51884770  | ANKFN1   | intron 10               | q22    | CT | 0.7463 | 0.804 | 0.0002815 |
| 9  | rs4258076  | 19654081  | SLC24A2  | intron 9                | p22.1  | GT | 0.6704 | 1.223 | 0.0002822 |
| 4  | rs3733552  | 82333327  | PRKG2    | intron 17               | q21.21 | CG | 0.947  | 0.642 | 0.0002829 |
| 2  | rs1561552  | 123035471 | TSN      | 793575 base downstream  | q14.3  | GT | 0.6606 | 1.226 | 0.0002839 |
| 2  | rs2950942  | 51639121  | NRXN1    | 525943 base downstream  | p16.3  | CT | 0.5502 | 0.826 | 0.0002846 |
| 11 | rs2207820  | 32217307  | RCN1     | 133654 base downstream  | p13    | AC | 0.676  | 1.229 | 0.0002849 |
| 5  | rs2240785  | 149561777 | SLC6A7   | intron 6                | q33.1  | CT | 0.027  | 1.711 | 0.0002858 |
| 2  | rs4973009  | 232169359 | MGC35154 | 2123 base downstream    | q37.1  | AG | 0.0895 | 1.413 | 0.0002862 |
| 2  | rs11675229 | 30859743  | CAPN13   | intron 21               | p23.1  | CT | 0.3983 | 1.223 | 0.000287  |
| 2  | rs17010271 | 30860140  | CAPN13   | intron 21               | p23.1  | CT | 0.3985 | 1.224 | 0.0002872 |
| 21 | rs9977744  | 32322781  | HUNK     | 24534 base downstream   | q22.11 | CT | 0.149  | 0.758 | 0.0002872 |
| 4  | rs17603347 | 58850166  | IGFBP7   | 1178870 base downstream | q12    | CT | 0.7376 | 1.255 | 0.0002875 |
| 10 | rs1977583  | 30512398  | PAPD1    | 129366 base upstream    | p11.23 | AG | 0.3591 | 1.218 | 0.0002881 |
| 2  | rs4597573  | 30858680  | CAPN13   | intron 21               | p23.1  | CT | 0.6029 | 0.824 | 0.0002881 |
| 3  | rs7644196  | 24682368  | THRB     | 171051 base downstream  | p24.2  | CG | 0.4966 | 1.21  | 0.0002883 |
| 13 | rs285669   | 76023588  | KCTD12   | 328716 base upstream    | q22.3  | AG | 0.6869 | 0.803 | 0.0002885 |
| 3  | rs9876727  | 30335858  | TGFBR2   | 287139 base upstream    | p24.1  | AC | 0.4024 | 0.823 | 0.0002885 |
| 3  | rs9876671  | 30335640  | TGFBR2   | 287357 base upstream    | p24.1  | AG | 0.4024 | 0.823 | 0.0002887 |
| 11 | rs11043009 | 10881592  | EIF4G2   | 94434 base downstream   | p15.3  | CT | 0.8634 | 1.355 | 0.0002887 |
| 12 | rs12366571 | 94738697  | NTN4     | 30030 base downstream   | q22    | AC | 0.7292 | 0.81  | 0.0002892 |
| 21 | rs2823705  | 16553084  | C21orf34 | intron 4                | q21.1  | AG | 0.6047 | 0.823 | 0.0002902 |
| 3  | rs17787397 | 24683078  | THRB     | 171761 base downstream  | p24.2  | CT | 0.4966 | 1.21  | 0.0002904 |
| 14 | rs7152314  | 55245765  | KTN1     | 24718 base downstream   | q22.3  | CT | 0.8976 | 0.727 | 0.0002909 |
| 2  | rs4597574  | 30858801  | CAPN13   | intron 21               | p23.1  | CT | 0.6029 | 0.824 | 0.000291  |

|    |            |           |          |                        |        |    |        |       |           |
|----|------------|-----------|----------|------------------------|--------|----|--------|-------|-----------|
| 11 | rs7109202  | 32216841  | RCN1     | 133188 base downstream | p13    | CT | 0.676  | 1.228 | 0.0002911 |
| 5  | rs16902590 | 13526523  | DNAH5    | 216913 base upstream   | p15.2  | CT | 0.9206 | 0.695 | 0.0002915 |
| 10 | rs2795858  | 30512209  | PAPD1    | 129555 base upstream   | p11.23 | AG | 0.641  | 0.821 | 0.0002926 |
| 11 | rs1884382  | 32216421  | RCN1     | 132768 base downstream | p13    | AG | 0.6759 | 1.228 | 0.0002935 |
| 3  | rs6781057  | 30330791  | TGFBR2   | 292206 base upstream   | p24.1  | GT | 0.4023 | 0.824 | 0.0002944 |
| 14 | rs8015301  | 55246211  | KTN1     | 25164 base downstream  | q22.3  | CT | 0.8978 | 0.728 | 0.0002946 |
| 3  | rs6780847  | 30330534  | TGFBR2   | 292463 base upstream   | p24.1  | CT | 0.4023 | 0.824 | 0.0002948 |
| 2  | rs6548034  | 30858988  | CAPN13   | intron 21              | p23.1  | AG | 0.3971 | 1.214 | 0.0002953 |
| 4  | rs8051     | 1664607   | SLBP     | EXON 1                 | p16.3  | CT | 0.3306 | 1.23  | 0.0002965 |
| 1  | rs241220   | 4508064   | AJAP1    | 106900 base upstream   | p36.32 | AG | 0.6199 | 1.217 | 0.0002966 |
| 21 | rs2823704  | 16553023  | C21orf34 | intron 4               | q21.1  | CT | 0.3953 | 1.215 | 0.0002973 |
| 5  | rs2240787  | 149561988 | SLC6A7   | intron 6               | q33.1  | CT | 0.9731 | 0.583 | 0.0002983 |
| 1  | rs4916005  | 65081975  | JAK1     | intron 8               | p31.3  | CT | 0.126  | 0.744 | 0.0002984 |
| 4  | rs2030549  | 171427766 | AADAT    | 179819 base downstream | q33    | AT | 0.9756 | 0.547 | 0.0002992 |
| 17 | rs9913702  | 51893701  | ANKFN1   | intron 13              | q22    | CT | 0.7458 | 0.805 | 0.0002996 |
| 2  | rs7588418  | 172835915 | DLX2     | 160191 base downstream | q31.1  | CT | 0.3511 | 1.225 | 0.0002999 |
| 7  | rs4473990  | 52130574  | COBL     | 778584 base downstream | p12.1  | AG | 0.2237 | 0.783 | 0.0003    |
| 1  | rs12093269 | 65104374  | JAK1     | intron 18              | p31.3  | CT | 0.8575 | 1.355 | 0.0003    |
| 3  | rs6767967  | 24683878  | THRB     | 172561 base downstream | p24.2  | AG | 0.4966 | 1.21  | 0.0003    |
| 2  | rs12619351 | 46197239  | PRKCE    | intron 11              | p21    | GT | 0.2335 | 0.79  | 0.0003006 |
| 17 | rs1548809  | 51894034  | ANKFN1   | intron 13              | q22    | CT | 0.2542 | 1.242 | 0.000301  |
| 2  | rs1533295  | 111314462 | ACOXL    | intron 9               | q13    | AG | 0.6698 | 0.816 | 0.0003025 |
| 3  | rs11129397 | 30329364  | TGFBR2   | 293633 base upstream   | p24.1  | CT | 0.5976 | 1.214 | 0.0003033 |
| 6  | rs10947056 | 30203582  | TRIM40   | 8906 base upstream     | p21.33 | CG | 0.9472 | 0.654 | 0.0003049 |
| 5  | rs2240791  | 149562853 | SLC6A7   | intron 8               | q33.1  | AG | 0.0268 | 1.719 | 0.0003062 |
| 14 | rs2880396  | 55246612  | KTN1     | 25565 base downstream  | q22.3  | AC | 0.1013 | 1.367 | 0.0003063 |
| 12 | rs1492348  | 87460779  | KITLG    | intron 8               | q21.32 | AG | 0.9489 | 0.645 | 0.000307  |
| 6  | rs9401370  | 121495669 | C6orf170 | intron 8               | q22.31 | AT | 0.8094 | 0.789 | 0.0003073 |
| 3  | rs7641936  | 63489216  | SYNPR    | intron 2               | p14.2  | CT | 0.807  | 1.277 | 0.0003076 |
| 6  | rs9375002  | 121498592 | C6orf170 | intron 8               | q22.31 | AC | 0.1906 | 1.267 | 0.0003077 |
| 2  | rs1528816  | 51628765  | NRXN1    | 515587 base downstream | p16.3  | AG | 0.4752 | 1.208 | 0.0003078 |
| 2  | rs4953987  | 133207895 | NAP5     | intron 4               | q21.2  | AG | 0.3341 | 0.816 | 0.000308  |
| 20 | rs2038410  | 5197302   | PROKR2   | 33384 base upstream    | p12.3  | CT | 0.559  | 1.219 | 0.0003082 |
| 2  | rs1528815  | 51628777  | NRXN1    | 515599 base downstream | p16.3  | CG | 0.4752 | 1.208 | 0.0003084 |
| 4  | rs17520678 | 71146872  | CSN3     | intron 2               | q13.3  | AC | 0.8738 | 1.335 | 0.0003085 |
| 21 | rs2823703  | 16552797  | C21orf34 | intron 4               | q21.1  | CG | 0.6047 | 0.824 | 0.0003086 |
| 3  | rs6809482  | 30328416  | TGFBR2   | 294581 base upstream   | p24.1  | AG | 0.4024 | 0.824 | 0.0003087 |

|    |            |           |          |                         |        |    |        |       |           |
|----|------------|-----------|----------|-------------------------|--------|----|--------|-------|-----------|
| 22 | rs1473816  | 33862734  | RAXLX    | 49356 base downstream   | q12.3  | AG | 0.7479 | 1.264 | 0.0003089 |
| 2  | rs1358580  | 51626532  | NRXN1    | 513354 base downstream  | p16.3  | AG | 0.5243 | 0.828 | 0.0003089 |
| 5  | rs275829   | 64017230  | P18SRP   | 32505 base upstream     | q12.3  | AT | 0.5241 | 0.816 | 0.0003094 |
| 15 | rs17545973 | 51288845  | WDR72    | 304384 base upstream    | q21.3  | CT | 0.8311 | 0.772 | 0.00031   |
| 4  | rs1402960  | 58871935  | IGFBP7   | 1200639 base downstream | q12    | AG | 0.2791 | 0.811 | 0.0003101 |
| 17 | rs12945850 | 51900513  | ANKFN1   | intron 14               | q22    | CT | 0.2543 | 1.242 | 0.0003101 |
| 2  | rs2698031  | 51626312  | NRXN1    | 513134 base downstream  | p16.3  | AG | 0.5242 | 0.828 | 0.0003105 |
| 10 | rs3814160  | 47991283  | ZNF488   | EXON 2                  | q11.22 | CT | 0.864  | 0.743 | 0.0003121 |
| 3  | rs9848074  | 63489025  | SYNPR    | intron 2                | p14.2  | CG | 0.807  | 1.277 | 0.0003134 |
| 21 | rs239010   | 16551998  | C21orf34 | intron 4                | q21.1  | AG | 0.3953 | 1.214 | 0.0003145 |
| 2  | rs9308637  | 123031511 | TSN      | 789615 base downstream  | q14.3  | CT | 0.3394 | 0.817 | 0.0003148 |
| 18 | rs9962491  | 64661900  | CCDC102B | intron 5                | q22.1  | CT | 0.7177 | 0.807 | 0.0003149 |
| 4  | rs4149     | 82337376  | PRKG2    | intron 17               | q21.21 | CT | 0.9472 | 0.642 | 0.0003152 |
| 3  | rs11921529 | 63488625  | SYNPR    | intron 2                | p14.2  | AG | 0.193  | 0.783 | 0.0003171 |
| 7  | rs4498494  | 52130379  | COBL     | 778389 base downstream  | p12.1  | AG | 0.776  | 1.275 | 0.0003172 |
| 2  | rs3791259  | 134734535 | MGAT5    | intron 1                | q21.2  | CT | 0.957  | 0.624 | 0.0003176 |
| 2  | rs7592480  | 30844445  | CAPN13   | intron 18               | p23.1  | AG | 0.3086 | 1.224 | 0.0003178 |
| 4  | rs1849717  | 71146110  | CSN3     | intron 2                | q13.3  | CT | 0.8686 | 1.32  | 0.0003182 |
| 2  | rs1080548  | 123024644 | TSN      | 782748 base downstream  | q14.3  | CT | 0.3395 | 0.817 | 0.0003183 |
| 5  | rs275828   | 64018562  | P18SRP   | 31173 base upstream     | q12.3  | AG | 0.5325 | 0.821 | 0.0003199 |
| 2  | rs13003439 | 30843832  | CAPN13   | intron 18               | p23.1  | GT | 0.3086 | 1.223 | 0.0003207 |
| 1  | rs10789166 | 65085401  | JAK1     | intron 12               | p31.3  | AG | 0.8738 | 1.342 | 0.0003212 |
| 2  | rs1528817  | 51625061  | NRXN1    | 511883 base downstream  | p16.3  | AG | 0.5236 | 0.829 | 0.0003213 |
| 8  | rs10888095 | 14906785  | SGCZ     | intron 7                | p22    | AC | 0.5213 | 1.208 | 0.0003216 |
| 5  | rs325571   | 104090005 | NUDT12   | 1163616 base downstream | q21.2  | AG | 0.1787 | 1.289 | 0.0003223 |
| 2  | rs1919434  | 51624921  | NRXN1    | 511743 base downstream  | p16.3  | CT | 0.4764 | 1.207 | 0.0003224 |
| 3  | rs6793060  | 24671288  | THRB     | 159971 base downstream  | p24.2  | AG | 0.5157 | 1.208 | 0.0003224 |
| 14 | rs12432019 | 55248459  | KTN1     | 27412 base downstream   | q22.3  | CG | 0.1006 | 1.361 | 0.0003226 |
| 2  | rs10201094 | 123022799 | TSN      | 780903 base downstream  | q14.3  | CG | 0.3392 | 0.816 | 0.0003226 |
| 14 | rs12431962 | 55248246  | KTN1     | 27199 base downstream   | q22.3  | AG | 0.1006 | 1.361 | 0.0003227 |
| 14 | rs11621130 | 55251053  | KTN1     | 30006 base downstream   | q22.3  | CT | 0.8995 | 0.735 | 0.0003239 |
| 21 | rs2823702  | 16551609  | C21orf34 | intron 4                | q21.1  | AG | 0.6048 | 0.824 | 0.0003245 |
| 4  | rs17089214 | 58848803  | IGFBP7   | 1177507 base downstream | q12    | CT | 0.2791 | 0.812 | 0.000325  |
| 3  | rs6770081  | 63488445  | SYNPR    | intron 2                | p14.2  | AG | 0.807  | 1.276 | 0.0003258 |
| 5  | rs11952402 | 13544938  | DNAH5    | 198498 base upstream    | p15.2  | CT | 0.0863 | 1.407 | 0.0003268 |
| 3  | rs6549981  | 30323764  | TGFBR2   | 299233 base upstream    | p24.1  | CT | 0.5976 | 1.213 | 0.0003268 |
| 5  | rs6877519  | 2516858   | IRX2     | 283021 base upstream    | p15.33 | AG | 0.6143 | 1.233 | 0.0003273 |

|    |            |           |          |                        |        |    |        |       |           |
|----|------------|-----------|----------|------------------------|--------|----|--------|-------|-----------|
| 10 | rs6584994  | 112308514 | CSPG6    | 8924 base upstream     | q25.2  | CG | 0.6995 | 0.81  | 0.0003278 |
| 21 | rs2823700  | 16550664  | C21orf34 | intron 4               | q21.1  | CG | 0.3952 | 1.213 | 0.0003286 |
| 8  | rs1125265  | 14907805  | SGCZ     | intron 7               | p22    | CT | 0.4786 | 0.828 | 0.000329  |
| 17 | rs2110200  | 51775701  | ANKFN1   | intron 3               | q22    | GT | 0.2915 | 1.235 | 0.0003302 |
| 2  | rs2091427  | 123023527 | TSN      | 781631 base downstream | q14.3  | CG | 0.3393 | 0.818 | 0.0003302 |
| 4  | rs1517547  | 82312214  | PRKG2    | intron 16              | q21.21 | CT | 0.9358 | 0.683 | 0.0003308 |
| 4  | rs1546651  | 82313069  | PRKG2    | intron 16              | q21.21 | CT | 0.9357 | 0.683 | 0.0003311 |
| 2  | rs10171434 | 64133110  | VPS54    | 33392 base downstream  | p14    | CT | 0.93   | 0.703 | 0.0003314 |
| 4  | rs1972127  | 82313093  | PRKG2    | intron 16              | q21.21 | AG | 0.0643 | 1.464 | 0.0003314 |
| 4  | rs11933194 | 82313570  | PRKG2    | intron 16              | q21.21 | CT | 0.9357 | 0.683 | 0.0003315 |
| 21 | rs239009   | 16549874  | C21orf34 | intron 4               | q21.1  | AG | 0.3991 | 1.218 | 0.0003316 |
| 1  | rs7555006  | 51252846  | CDKN2C   | 39951 base downstream  | p33    | AG | 0.5919 | 1.217 | 0.0003316 |
| 11 | rs16908503 | 10869437  | EIF4G2   | 82279 base downstream  | p15.3  | AG | 0.8591 | 1.316 | 0.0003319 |
| 15 | rs1836592  | 86265806  | NTRK3    | intron 3               | q25.3  | AT | 0.1895 | 0.78  | 0.0003323 |
| 1  | rs2615060  | 223940235 | ENAH     | 32767 base downstream  | q42.12 | AC | 0.2361 | 1.244 | 0.0003332 |
| 5  | rs2279170  | 40303687  | PTGER4   | 412101 base upstream   | p13.1  | CT | 0.3584 | 1.217 | 0.0003333 |
| 4  | rs3943629  | 82314024  | PRKG2    | intron 16              | q21.21 | AT | 0.9357 | 0.683 | 0.0003334 |
| 2  | rs3769450  | 200960600 | LOC26010 | intron 2               | q33.1  | AG | 0.6156 | 1.237 | 0.0003339 |
| 5  | rs182149   | 64028945  | P18SRP   | 20790 base upstream    | q12.3  | CT | 0.4663 | 1.207 | 0.0003343 |
| 3  | rs11928896 | 63487802  | SYNPR    | intron 2               | p14.2  | AG | 0.807  | 1.275 | 0.0003344 |
| 19 | rs7248564  | 17338318  | PLVAP    | intron 5               | p13.11 | CT | 0.5478 | 1.213 | 0.0003346 |
| 10 | rs10763789 | 19333212  | ARL5B    | 326266 base downstream | p12.33 | CG | 0.8328 | 1.288 | 0.0003351 |
| 3  | rs6807571  | 144997632 | SLC9A9   | intron 13              | q24    | AG | 0.1698 | 1.296 | 0.0003368 |
| 2  | rs10180446 | 111318413 | ACOXL    | intron 10              | q13    | CG | 0.3259 | 1.22  | 0.0003369 |
| 11 | rs10840506 | 10865614  | EIF4G2   | 78456 base downstream  | p15.3  | CT | 0.1412 | 0.76  | 0.0003371 |
| 10 | rs2488034  | 30494239  | KIAA1462 | 117433 base downstream | p11.23 | AG | 0.3578 | 1.223 | 0.0003381 |
| 17 | rs9899359  | 51850895  | ANKFN1   | intron 7               | q22    | CG | 0.2384 | 1.247 | 0.0003381 |
| 3  | rs7643926  | 24682097  | THRB     | 170780 base downstream | p24.2  | CT | 0.5712 | 1.211 | 0.0003384 |
| 10 | rs2779068  | 30543585  | PAPD1    | 98179 base upstream    | p11.23 | GT | 0.3596 | 1.217 | 0.0003389 |
| 10 | rs17457528 | 48000055  | RBP3     | 1439 base upstream     | q11.22 | AG | 0.8641 | 0.747 | 0.0003396 |
| 10 | rs2505109  | 30508511  | KIAA1462 | 131705 base downstream | p11.23 | CT | 0.642  | 0.824 | 0.0003399 |
| 20 | rs363012   | 10167799  | SNAP25   | intron 1               | p12.2  | AG | 0.6695 | 0.818 | 0.0003403 |
| 3  | rs1495579  | 30322358  | TGFBR2   | 300639 base upstream   | p24.1  | GT | 0.5975 | 1.212 | 0.0003411 |
| 2  | rs13019266 | 111321113 | ACOXL    | intron 10              | q13    | CT | 0.6746 | 0.82  | 0.0003412 |
| 12 | rs17581242 | 115328821 | FLJ42957 | 126788 base upstream   | q24.22 | GT | 0.1495 | 1.307 | 0.0003413 |
| 21 | rs2823699  | 16550560  | C21orf34 | intron 4               | q21.1  | CT | 0.6048 | 0.825 | 0.0003414 |
| 3  | rs11706302 | 144996927 | SLC9A9   | intron 13              | q24    | AG | 0.8303 | 0.773 | 0.0003416 |

|    |            |           |          |                        |        |    |        |       |           |
|----|------------|-----------|----------|------------------------|--------|----|--------|-------|-----------|
| 2  | rs3791266  | 134735206 | MGAT5    | intron 1               | q21.2  | CG | 0.957  | 0.626 | 0.0003419 |
| 2  | rs2698022  | 51641486  | NRXN1    | 528308 base downstream | p16.3  | AC | 0.4496 | 1.207 | 0.0003422 |
| 5  | rs283612   | 73286248  | RGNEF    | 42964 base downstream  | q13.2  | CT | 0.3823 | 0.825 | 0.0003426 |
| 4  | rs1545287  | 82314170  | PRKG2    | intron 16              | q21.21 | AG | 0.0642 | 1.465 | 0.0003428 |
| 5  | rs275832   | 64029942  | P18SRP   | 19793 base upstream    | q12.3  | AG | 0.4662 | 1.206 | 0.0003432 |
| 10 | rs2689216  | 30543961  | PAPD1    | 97803 base upstream    | p11.23 | AG | 0.6404 | 0.822 | 0.0003443 |
| 13 | rs9533862  | 43932814  | TSC22D1  | intron 2               | q14.11 | CG | 0.0266 | 0.511 | 0.0003455 |
| 1  | rs12407862 | 110903737 | KCNA10   | 40417 base downstream  | p13.3  | CT | 0.8143 | 0.785 | 0.000346  |
| 12 | rs10777108 | 87284400  | KITLG    | 126299 base upstream   | q21.32 | AC | 0.035  | 1.688 | 0.0003464 |
| 4  | rs11722020 | 82302241  | PRKG2    | intron 13              | q21.21 | CT | 0.0639 | 1.463 | 0.0003466 |
| 3  | rs6766087  | 63490780  | SYNPR    | intron 2               | p14.2  | CT | 0.1929 | 0.786 | 0.0003474 |
| 3  | rs7617487  | 63487061  | SYNPR    | intron 2               | p14.2  | GT | 0.193  | 0.785 | 0.0003486 |
| 4  | rs6828114  | 82301012  | PRKG2    | intron 13              | q21.21 | CT | 0.0639 | 1.462 | 0.000349  |
| 10 | rs17104653 | 124863434 | HMX3     | 22122 base upstream    | q26.13 | CG | 0.9563 | 1.692 | 0.0003491 |
| 5  | rs283615   | 73286880  | RGNEF    | 43596 base downstream  | q13.2  | AT | 0.3824 | 0.825 | 0.0003494 |
| 2  | rs9917154  | 111323062 | ACOXL    | intron 10              | q13    | CG | 0.6753 | 0.82  | 0.0003499 |
| 21 | rs9808741  | 16550380  | C21orf34 | intron 4               | q21.1  | GT | 0.3952 | 1.212 | 0.0003501 |
| 16 | rs7205094  | 47661065  | CBLN1    | 209136 base upstream   | q12.1  | GT | 0.4524 | 0.821 | 0.0003501 |
| 3  | rs6777474  | 63490926  | SYNPR    | intron 2               | p14.2  | AG | 0.8069 | 1.273 | 0.0003506 |
| 3  | rs6800578  | 144995427 | SLC9A9   | intron 12              | q24    | CT | 0.8306 | 0.774 | 0.0003506 |
| 5  | rs283616   | 73287077  | RGNEF    | 43793 base downstream  | q13.2  | CG | 0.3824 | 0.825 | 0.0003509 |
| 11 | rs1884379  | 32216036  | RCN1     | 132383 base downstream | p13    | GT | 0.3244 | 0.816 | 0.0003514 |
| 6  | rs2129857  | 94775217  | EPHA7    | 589224 base downstream | q16.1  | CT | 0.4326 | 1.214 | 0.0003514 |
| 4  | rs3733550  | 82292319  | PRKG2    | intron 12              | q21.21 | CT | 0.9361 | 0.684 | 0.0003515 |
| 20 | rs1847326  | 47379153  | KCNB1    | 42758 base upstream    | q13.13 | AC | 0.0742 | 1.455 | 0.0003516 |
| 2  | rs3828175  | 134735267 | MGAT5    | intron 1               | q21.2  | AG | 0.957  | 0.626 | 0.0003517 |
| 5  | rs283618   | 73287272  | RGNEF    | 43988 base downstream  | q13.2  | AT | 0.3824 | 0.825 | 0.0003542 |
| 2  | rs11695611 | 123031238 | TSN      | 789342 base downstream | q14.3  | CT | 0.3592 | 0.822 | 0.0003544 |
| 6  | rs9462696  | 41399102  | NCR2     | 12403 base upstream    | p21.1  | AT | 0.4472 | 0.822 | 0.0003548 |
| 6  | rs9471555  | 41398747  | NCR2     | 12758 base upstream    | p21.1  | CT | 0.4472 | 0.822 | 0.0003553 |
| 21 | rs2823696  | 16549688  | C21orf34 | intron 4               | q21.1  | AT | 0.3945 | 1.215 | 0.0003568 |
| 21 | rs2823697  | 16550037  | C21orf34 | intron 4               | q21.1  | CT | 0.3946 | 1.215 | 0.0003569 |
| 15 | rs1381112  | 86366855  | NTRK3    | intron 6               | q25.3  | AG | 0.875  | 0.755 | 0.0003569 |
| 2  | rs7576541  | 111323872 | ACOXL    | intron 10              | q13    | CT | 0.324  | 1.22  | 0.0003573 |
| 6  | rs9401367  | 121445811 | C6orf170 | intron 1               | q22.31 | CT | 0.8054 | 0.791 | 0.0003577 |
| 3  | rs2121775  | 144994842 | SLC9A9   | intron 12              | q24    | AG | 0.8308 | 0.775 | 0.0003578 |
| 5  | rs6874889  | 13551578  | DNAH5    | 191858 base upstream   | p15.2  | AG | 0.0863 | 1.401 | 0.0003585 |

|    |            |           |           |                        |        |    |        |       |           |
|----|------------|-----------|-----------|------------------------|--------|----|--------|-------|-----------|
| 5  | rs4867939  | 168156259 | SLIT3     | intron 27              | q35.1  | CT | 0.5417 | 1.213 | 0.0003597 |
| 11 | rs10767925 | 32215762  | RCN1      | 132109 base downstream | p13    | AG | 0.6756 | 1.224 | 0.0003614 |
| 10 | rs955760   | 97113875  | SORBS1    | intron 11              | q23.33 | AG | 0.5661 | 0.827 | 0.0003626 |
| 3  | rs10935083 | 134936517 | TF        | 11407 base upstream    | q22.1  | CT | 0.0472 | 1.527 | 0.0003629 |
| 3  | rs1495578  | 30322459  | TGFBR2    | 300538 base upstream   | p24.1  | AG | 0.4107 | 0.824 | 0.0003642 |
| 2  | rs1528814  | 51629015  | NRXN1     | 515837 base downstream | p16.3  | CT | 0.4817 | 1.208 | 0.0003652 |
| 3  | rs16854336 | 144993002 | SLC9A9    | intron 12              | q24    | CT | 0.8304 | 0.774 | 0.0003659 |
| 4  | rs10516650 | 82315844  | PRKG2     | intron 17              | q21.21 | AC | 0.064  | 1.466 | 0.0003659 |
| 13 | rs9506821  | 21759295  | FGF9      | 585111 base downstream | q12.11 | AG | 0.5909 | 0.822 | 0.0003665 |
| 18 | rs12961437 | 48360097  | DCC       | intron 1               | q21.2  | GT | 0.1554 | 0.766 | 0.0003684 |
| 2  | rs3828176  | 134738798 | MGAT5     | intron 1               | q21.2  | AT | 0.9568 | 0.627 | 0.0003691 |
| 18 | rs11665228 | 48349538  | DCC       | intron 1               | q21.2  | CT | 0.1554 | 0.767 | 0.0003695 |
| 6  | rs12202131 | 30221529  | TRIM40    | intron 1               | p21.33 | AT | 0.0512 | 1.521 | 0.0003701 |
| 4  | rs10025532 | 174752942 | MORF4     | 20720 base upstream    | q34.1  | AG | 0.6865 | 0.807 | 0.0003707 |
| 7  | rs17143423 | 20862587  | SP8       | 69557 base downstream  | p15.3  | AG | 0.83   | 0.769 | 0.0003718 |
| 18 | rs9965853  | 6392126   | L3MBTL4   | intron 19              | p11.31 | CT | 0.5403 | 1.22  | 0.0003726 |
| 6  | rs6913743  | 157077339 | ARID1B    | 63438 base upstream    | q25.3  | AG | 0.948  | 0.662 | 0.0003729 |
| 3  | rs17068905 | 63485884  | SYNPR     | intron 2               | p14.2  | CT | 0.807  | 1.272 | 0.0003735 |
| 18 | rs12964400 | 48306360  | DCC       | intron 1               | q21.2  | AG | 0.8431 | 1.307 | 0.0003747 |
| 12 | rs10847348 | 126490295 | SLC15A4   | 1353420 base upstream  | q24.32 | CT | 0.7422 | 1.24  | 0.0003751 |
| 3  | rs4392438  | 22537241  | UBE2E2    | 682570 base upstream   | p24.3  | CT | 0.7317 | 0.795 | 0.0003757 |
| 14 | rs12587803 | 55252880  | KTN1      | 31833 base downstream  | q22.3  | AG | 0.0999 | 1.359 | 0.0003763 |
| 8  | rs11136431 | 1778840   | ARHGEF10  | intron 1               | p23.3  | CT | 0.4378 | 1.213 | 0.0003777 |
| 5  | rs183917   | 64047836  | P18SRP    | 1899 base upstream     | q12.3  | CT | 0.5342 | 0.831 | 0.0003783 |
| 2  | rs1919432  | 51644950  | NRXN1     | 531772 base downstream | p16.3  | CT | 0.5505 | 0.83  | 0.0003796 |
| 6  | rs9351097  | 87194834  | HTR1E     | 509294 base upstream   | q14.3  | GT | 0.8413 | 0.776 | 0.0003806 |
| 10 | rs7901527  | 112303893 | CSPG6     | 13545 base upstream    | q25.2  | AG | 0.6983 | 0.816 | 0.0003807 |
| 3  | rs2944404  | 117034860 | LSAMP     | intron 1               | q13.31 | AG | 0.0718 | 1.434 | 0.000382  |
| 11 | rs12287573 | 32214720  | RCN1      | 131067 base downstream | p13    | CT | 0.6755 | 1.223 | 0.0003825 |
| 1  | rs7515605  | 81202644  | LPN2      | 836025 base upstream   | p31.1  | AG | 0.1668 | 0.766 | 0.0003828 |
| 10 | rs17104648 | 124859893 | HMX3      | 25663 base upstream    | q26.13 | CG | 0.9564 | 1.659 | 0.000383  |
| 2  | rs6711988  | 105447178 | FHL2      | 25786 base downstream  | q12.2  | CT | 0.0735 | 1.47  | 0.0003836 |
| 4  | rs10516651 | 82316475  | PRKG2     | intron 17              | q21.21 | CT | 0.9361 | 0.682 | 0.0003839 |
| 3  | rs16840751 | 134933123 | TF        | 14801 base upstream    | q22.1  | AG | 0.0477 | 1.517 | 0.0003843 |
| 3  | rs12233446 | 144993820 | SLC9A9    | intron 12              | q24    | CT | 0.8315 | 0.779 | 0.0003844 |
| 21 | rs2205205  | 40071834  | LOC150084 | intron 4               | q22.2  | AG | 0.3174 | 1.219 | 0.000387  |
| 8  | rs10888094 | 14906737  | SGCZ      | intron 7               | p22    | AG | 0.5226 | 1.205 | 0.0003871 |

|    |            |           |           |                        |        |    |        |       |           |
|----|------------|-----------|-----------|------------------------|--------|----|--------|-------|-----------|
| 1  | rs9426771  | 21831326  | RAP1GA1   | intron 23              | p36.12 | GT | 0.5861 | 1.221 | 0.0003872 |
| 4  | rs2073503  | 3505974   | LRPAP1    | 2032 base downstream   | p16.2  | CG | 0.6918 | 1.222 | 0.0003875 |
| 5  | rs10061059 | 175193656 | CPLX2     | intron 2               | q35.2  | AG | 0.2175 | 0.796 | 0.0003886 |
| 2  | rs13385109 | 105446439 | FHL2      | 25047 base downstream  | q12.2  | AT | 0.9264 | 0.677 | 0.0003889 |
| 1  | rs1660375  | 212361177 | PROX1     | 84794 base downstream  | q41    | AG | 0.0278 | 1.721 | 0.000389  |
| 2  | rs1045832  | 128337564 | MGC4268   | EXON 1                 | q14.3  | AG | 0.59   | 0.827 | 0.0003893 |
| 2  | rs3791270  | 134738836 | MGAT5     | intron 1               | q21.2  | AG | 0.9567 | 0.629 | 0.0003897 |
| 2  | rs9989768  | 105447653 | FHL2      | 26261 base downstream  | q12.2  | CT | 0.0731 | 1.47  | 0.0003897 |
| 11 | rs1155855  | 32214418  | RCN1      | 130765 base downstream | p13    | AG | 0.3245 | 0.818 | 0.0003907 |
| 2  | rs1356424  | 98792270  | MGC42367  | intron 3               | q11.2  | CT | 0.6266 | 0.812 | 0.0003913 |
| 4  | rs6552548  | 183404530 | ODZ3      | 77600 base upstream    | q35.1  | AC | 0.6697 | 1.228 | 0.0003914 |
| 2  | rs3791271  | 134738884 | MGAT5     | intron 1               | q21.2  | CT | 0.0433 | 1.59  | 0.0003925 |
| 6  | rs13190874 | 15935221  | DTNBP1    | 163971 base downstream | p22.3  | CT | 0.131  | 1.316 | 0.0003932 |
| 3  | rs11715340 | 134917507 | TF        | 30417 base upstream    | q22.1  | AT | 0.0484 | 1.516 | 0.0003942 |
| 1  | rs6671533  | 55443484  | USP24     | intron 64              | p32.3  | CG | 0.2111 | 1.271 | 0.0003943 |
| 3  | rs6775133  | 63485004  | SYNPR     | intron 2               | p14.2  | AG | 0.807  | 1.271 | 0.0003953 |
| 10 | rs2795857  | 30512070  | PAPD1     | 129694 base upstream   | p11.23 | CG | 0.3579 | 1.212 | 0.0003968 |
| 13 | rs9533877  | 43970674  | TSC22D1   | intron 2               | q14.11 | AG | 0.0268 | 0.515 | 0.000398  |
| 17 | rs1442831  | 51907580  | ANKFN1    | intron 14              | q22    | AT | 0.2532 | 1.237 | 0.0003984 |
| 17 | rs8070836  | 51908311  | ANKFN1    | intron 14              | q22    | CT | 0.7468 | 0.809 | 0.0003988 |
| 17 | rs11653462 | 51911802  | ANKFN1    | intron 15              | q22    | GT | 0.7468 | 0.809 | 0.0003998 |
| 3  | rs1390298  | 30319780  | RBMS3     | 298157 base downstream | p24.1  | CT | 0.5973 | 1.21  | 0.0003999 |
| 9  | rs497510   | 91833463  | GADD45G   | 422176 base downstream | q22.2  | GT | 0.5306 | 1.204 | 0.0004003 |
| 12 | rs4761007  | 126490843 | SLC15A4   | 1352872 base upstream  | q24.32 | CT | 0.2676 | 0.802 | 0.0004014 |
| 6  | rs2523386  | 29819726  | HLA-F     | 17444 base downstream  | p22.1  | AG | 0.1634 | 1.281 | 0.0004033 |
| 16 | rs1345408  | 47680675  | CBLN1     | 189526 base upstream   | q12.1  | CG | 0.4633 | 0.829 | 0.000404  |
| 2  | rs2937600  | 155411014 | KCNJ3     | intron 2               | q24.1  | AG | 0.7094 | 1.227 | 0.0004041 |
| 11 | rs1155856  | 32214070  | RCN1      | 130417 base downstream | p13    | AG | 0.6754 | 1.222 | 0.0004048 |
| 21 | rs7278733  | 40073319  | LOC150084 | intron 5               | q22.2  | AG | 0.6826 | 0.821 | 0.0004048 |
| 2  | rs1900132  | 155411314 | KCNJ3     | intron 2               | q24.1  | AG | 0.7094 | 1.227 | 0.0004049 |
| 1  | rs17123324 | 62513884  | ANKRD38   | intron 8               | p31.3  | AG | 0.0175 | 2.165 | 0.0004072 |
| 1  | rs898386   | 202846320 | LRRN5     | 6607 base upstream     | q32.1  | AG | 0.308  | 1.224 | 0.0004072 |
| 3  | rs13067087 | 63483291  | SYNPR     | intron 2               | p14.2  | AT | 0.8072 | 1.278 | 0.0004076 |
| 1  | rs898387   | 202845996 | LRRN5     | 6931 base upstream     | q32.1  | AG | 0.6919 | 0.817 | 0.0004084 |
| 2  | rs4851165  | 98851853  | MGC42367  | intron 9               | q11.2  | CT | 0.94   | 0.672 | 0.0004086 |
| 2  | rs13025854 | 232149419 | MGC35154  | 16436 base upstream    | q37.1  | AC | 0.9163 | 0.717 | 0.0004089 |
| 3  | rs2202492  | 63482702  | SYNPR     | intron 2               | p14.2  | CT | 0.1928 | 0.782 | 0.0004091 |

|    |            |           |           |                         |        |    |        |       |           |
|----|------------|-----------|-----------|-------------------------|--------|----|--------|-------|-----------|
| 2  | rs6735741  | 134739376 | MGAT5     | intron 1                | q21.2  | AG | 0.9566 | 0.63  | 0.0004092 |
| 8  | rs16893344 | 134275461 | WISP1     | intron 1                | q24.22 | CT | 0.646  | 1.214 | 0.0004097 |
| 10 | rs2505110  | 30510906  | PAPD1     | 130858 base upstream    | p11.23 | AG | 0.3578 | 1.211 | 0.00041   |
| 6  | rs4712261  | 15943835  | DTNBP1    | 172585 base downstream  | p22.3  | CT | 0.8687 | 0.762 | 0.0004102 |
| 3  | rs2221476  | 63482584  | SYNPR     | intron 2                | p14.2  | AG | 0.8072 | 1.28  | 0.0004107 |
| 6  | rs730858   | 29818607  | HLA-F     | 16325 base downstream   | p22.1  | AG | 0.1634 | 1.281 | 0.0004116 |
| 1  | rs7537835  | 81205753  | LPHN2     | 832916 base upstream    | p31.1  | AG | 0.6262 | 1.216 | 0.0004116 |
| 6  | rs13218971 | 15938880  | DTNBP1    | 167630 base downstream  | p22.3  | CT | 0.8687 | 0.762 | 0.0004119 |
| 2  | rs1609361  | 51645727  | NRXN1     | 532549 base downstream  | p16.3  | AG | 0.5505 | 0.831 | 0.0004123 |
| 1  | rs2184484  | 116602943 | ATP1A1    | 114415 base upstream    | p13.1  | AG | 0.6625 | 0.821 | 0.0004126 |
| 6  | rs4712260  | 15935963  | DTNBP1    | 164713 base downstream  | p22.3  | AG | 0.1313 | 1.313 | 0.0004135 |
| 13 | rs2038711  | 21757408  | FGF9      | 583224 base downstream  | q12.11 | CT | 0.6109 | 0.827 | 0.000414  |
| 5  | rs10475154 | 2532789   | IRX2      | 267090 base upstream    | p15.33 | GT | 0.3222 | 0.814 | 0.0004142 |
| 2  | rs3791276  | 134741186 | MGAT5     | intron 1                | q21.2  | AC | 0.9565 | 0.63  | 0.0004147 |
| 13 | rs9533885  | 43987160  | TSC22D1   | intron 2                | q14.11 | AG | 0.9731 | 1.937 | 0.0004147 |
| 5  | rs6859797  | 104016997 | NUDT12    | 1090608 base downstream | q21.2  | AC | 0.1646 | 1.287 | 0.0004148 |
| 12 | rs10751692 | 130809881 | SFRS8     | intron 11               | q24.33 | CT | 0.3825 | 0.829 | 0.0004153 |
| 12 | rs3741526  | 130806294 | SFRS8     | intron 10               | q24.33 | CT | 0.6178 | 1.207 | 0.0004157 |
| 6  | rs2517938  | 29817819  | HLA-F     | 15537 base downstream   | p22.1  | CT | 0.1634 | 1.281 | 0.000416  |
| 2  | rs3791275  | 134741150 | MGAT5     | intron 1                | q21.2  | AG | 0.9565 | 0.631 | 0.0004163 |
| 2  | rs10182727 | 232148981 | MGC35154  | 16874 base upstream     | q37.1  | AT | 0.0839 | 1.391 | 0.0004171 |
| 14 | rs6571636  | 33759807  | C14orf147 | 212088 base upstream    | q13.1  | AG | 0.6052 | 1.211 | 0.0004173 |
| 6  | rs9468692  | 30227869  | TRIM10    | EXON 1                  | p21.33 | GT | 0.9492 | 0.66  | 0.0004183 |
| 3  | rs3844271  | 146903072 | PLOD2     | 366845 base upstream    | q24    | AG | 0.5353 | 0.816 | 0.000419  |
| 2  | rs3791273  | 134740952 | MGAT5     | intron 1                | q21.2  | CG | 0.0435 | 1.585 | 0.00042   |
| 2  | rs333238   | 107970060 | SLC5A7    | intron 1                | q12.3  | AG | 0.1965 | 0.781 | 0.0004201 |
| 10 | rs1571957  | 30509940  | PAPD1     | 131824 base upstream    | p11.23 | CT | 0.3577 | 1.21  | 0.000422  |
| 5  | rs10075967 | 64055597  | P18SRP    | EXON 1                  | q12.3  | CT | 0.4704 | 1.203 | 0.0004221 |
| 5  | rs1863931  | 175189132 | CPLX2     | intron 2                | q35.2  | AG | 0.2164 | 0.795 | 0.000423  |
| 6  | rs2743950  | 29817265  | HLA-F     | 14983 base downstream   | p22.1  | CT | 0.8366 | 0.781 | 0.0004231 |
| 2  | rs333236   | 107970399 | SLC5A7    | intron 1                | q12.3  | AG | 0.8035 | 1.28  | 0.0004235 |
| 21 | rs11701807 | 17230025  | C21orf34  | 328612 base downstream  | q21.1  | CT | 0.2592 | 1.24  | 0.0004237 |
| 3  | rs7614676  | 63482284  | SYNPR     | intron 2                | p14.2  | AG | 0.8074 | 1.287 | 0.000425  |
| 2  | rs1528812  | 51646842  | NRXN1     | 533664 base downstream  | p16.3  | CG | 0.4493 | 1.203 | 0.0004269 |
| 2  | rs6736839  | 133195447 | NAP5      | intron 1                | q21.2  | CT | 0.5591 | 1.205 | 0.0004277 |
| 6  | rs9468693  | 30228616  | TRIM10    | EXON 1                  | p21.33 | CT | 0.0507 | 1.515 | 0.0004281 |
| 3  | rs7629687  | 30361546  | TGFBR2    | 261451 base upstream    | p24.1  | AT | 0.3903 | 0.823 | 0.0004283 |



|    |            |           |          |                        |        |    |        |       |           |
|----|------------|-----------|----------|------------------------|--------|----|--------|-------|-----------|
| 4  | rs10003341 | 82316801  | PRKG2    | intron 17              | q21.21 | AC | 0.9364 | 0.681 | 0.0004296 |
| 10 | rs17103522 | 124167869 | PLEKHA1  | intron 8               | q26.13 | CT | 0.1307 | 0.741 | 0.0004321 |
| 13 | rs9583775  | 89501299  | GPC5     | 1347588 base upstream  | q31.3  | AG | 0.1887 | 0.789 | 0.0004344 |
| 1  | rs309543   | 23097909  | EPHB2    | intron 9               | p36.12 | AG | 0.3566 | 1.208 | 0.000435  |
| 8  | rs7012406  | 135219115 | ZNF406   | 340098 base upstream   | q24.22 | AT | 0.5239 | 0.834 | 0.0004351 |
| 15 | rs17545046 | 51189302  | ONECUT1  | 319801 base downstream | q21.3  | AG | 0.1714 | 1.297 | 0.0004355 |
| 15 | rs10438404 | 36725309  | FLJ35695 | 50781 base upstream    | q14    | GT | 0.4019 | 0.831 | 0.0004365 |
| 6  | rs13211010 | 15945269  | DTNBP1   | 174019 base downstream | p22.3  | CT | 0.1313 | 1.311 | 0.0004367 |
| 9  | rs12237890 | 119033609 | ASTN2    | intron 20              | q33.1  | AT | 0.0572 | 1.501 | 0.0004369 |
| 11 | rs11031664 | 32223969  | RCN1     | 140316 base downstream | p13    | CT | 0.6829 | 1.241 | 0.0004376 |
| 6  | rs2517941  | 29816396  | HLA-F    | 14114 base downstream  | p22.1  | CG | 0.8366 | 0.782 | 0.0004385 |
| 10 | rs4565845  | 124149040 | PLEKHA1  | intron 3               | q26.13 | AC | 0.8688 | 1.347 | 0.0004404 |
| 17 | rs759107   | 51764470  | ANKFN1   | intron 3               | q22    | AG | 0.2953 | 1.227 | 0.0004425 |
| 15 | rs3923022  | 36725830  | FLJ35695 | 50260 base upstream    | q14    | AG | 0.5982 | 1.203 | 0.0004439 |
| 9  | rs1335405  | 119032843 | ASTN2    | intron 20              | q33.1  | CT | 0.9428 | 0.666 | 0.0004444 |
| 2  | rs10498258 | 232145603 | MGC35154 | 20252 base upstream    | q37.1  | AG | 0.0843 | 1.383 | 0.000445  |
| 7  | rs10256394 | 52086483  | COBL     | 734493 base downstream | p12.1  | CT | 0.2252 | 0.802 | 0.0004455 |
| 2  | rs6727830  | 232144608 | MGC35154 | 21247 base upstream    | q37.1  | AG | 0.9158 | 0.723 | 0.000446  |
| 10 | rs17103488 | 124144159 | PLEKHA1  | intron 2               | q26.13 | CT | 0.1315 | 0.743 | 0.000446  |
| 11 | rs355220   | 41020808  | LRR4C    | 748568 base downstream | p12    | CT | 0.9644 | 1.752 | 0.0004461 |
| 15 | rs879131   | 86273174  | NTRK3    | intron 3               | q25.3  | AG | 0.8014 | 1.277 | 0.0004465 |
| 2  | rs333235   | 107973532 | SLC5A7   | intron 2               | q12.3  | CT | 0.1969 | 0.781 | 0.0004469 |
| 14 | rs10483393 | 31530235  | ARHGAP5  | 86010 base upstream    | q12    | CT | 0.786  | 0.787 | 0.0004484 |
| 21 | rs1475897  | 19398897  | PRSS7    | 701053 base downstream | q21.1  | AG | 0.3396 | 1.238 | 0.0004486 |
| 2  | rs1581667  | 51648256  | NRXN1    | 535078 base downstream | p16.3  | CT | 0.5514 | 0.831 | 0.0004489 |
| 3  | rs12493961 | 11219825  | HRH1     | intron 1               | p25.3  | AG | 0.9645 | 1.806 | 0.000449  |
| 2  | rs2698014  | 51649426  | NRXN1    | 536248 base downstream | p16.3  | GT | 0.4485 | 1.203 | 0.0004522 |
| 2  | rs2715062  | 51639646  | NRXN1    | 526468 base downstream | p16.3  | AG | 0.4523 | 1.203 | 0.0004525 |
| 3  | rs2972481  | 117048396 | LSAMP    | intron 3               | q13.31 | AG | 0.0724 | 1.43  | 0.0004531 |
| 10 | rs7895653  | 61813354  | ANK3     | intron 43              | q21.2  | CT | 0.7763 | 0.799 | 0.0004533 |
| 21 | rs2824149  | 17229575  | C21orf34 | 328162 base downstream | q21.1  | CT | 0.7221 | 0.817 | 0.0004534 |
| 1  | rs17514217 | 167156031 | ATP1B1   | 186539 base upstream   | q24.2  | AT | 0.1034 | 0.736 | 0.0004538 |
| 4  | rs10005912 | 82316860  | PRKG2    | intron 17              | q21.21 | GT | 0.0635 | 1.469 | 0.0004546 |
| 7  | rs6959643  | 5295742   | SLC29A4  | intron 2               | p22.1  | AT | 0.4131 | 1.208 | 0.000456  |
| 3  | rs9847885  | 134921034 | TF       | 26890 base upstream    | q22.1  | CT | 0.9512 | 0.671 | 0.0004578 |
| 3  | rs604132   | 54723274  | CACNA2D3 | intron 11              | p14.3  | AT | 0.41   | 0.82  | 0.0004583 |
| 2  | rs3915321  | 51618222  | NRXN1    | 505044 base downstream | p16.3  | CT | 0.581  | 0.821 | 0.0004584 |

|    |            |           |               |                         |        |    |        |       |           |
|----|------------|-----------|---------------|-------------------------|--------|----|--------|-------|-----------|
| 9  | rs10869020 | 70346371  | C9orf71       | 768 base downstream     | q13    | AG | 0.8557 | 1.305 | 0.0004585 |
| 13 | rs1491005  | 89487776  | GPC5          | 1361111 base upstream   | q31.3  | CT | 0.8113 | 1.267 | 0.0004589 |
| 15 | rs1122891  | 36725969  | FLJ35695      | 50121 base upstream     | q14    | CG | 0.4016 | 0.832 | 0.0004599 |
| 2  | rs3791261  | 134734676 | MGAT5         | intron 1                | q21.2  | GT | 0.0499 | 1.581 | 0.0004601 |
| 4  | rs2570073  | 58782188  | IGFBP7        | 1110892 base downstream | q12    | AC | 0.7227 | 1.232 | 0.0004605 |
| 3  | rs11717407 | 134920954 | TF            | 26970 base upstream     | q22.1  | AG | 0.9511 | 0.671 | 0.0004611 |
| 1  | rs6656346  | 110905211 | KCNA10        | 41891 base downstream   | p13.3  | AG | 0.2633 | 1.229 | 0.0004613 |
| 2  | rs3915322  | 51618512  | NRXN1         | 505334 base downstream  | p16.3  | AG | 0.419  | 1.217 | 0.0004619 |
| 6  | rs12194995 | 51918458  | PKHD1         | intron 31               | p12.2  | CT | 0.2001 | 0.793 | 0.0004622 |
| 10 | rs17700389 | 110680293 | XPNPEP1       | 934220 base upstream    | q25.1  | GT | 0.8191 | 1.273 | 0.0004624 |
| 9  | rs10746875 | 70346769  | C9orf71       | 1166 base downstream    | q13    | AT | 0.1443 | 0.766 | 0.0004626 |
| 19 | rs8182538  | 13277170  | CACNA1A       | intron 32               | p13.13 | AG | 0.4076 | 1.202 | 0.000463  |
| 10 | rs17700354 | 110679319 | XPNPEP1       | 935194 base upstream    | q25.1  | CT | 0.8191 | 1.273 | 0.0004631 |
| 2  | rs10460338 | 232142905 | MGC35154      | 22950 base upstream     | q37.1  | CT | 0.0836 | 1.386 | 0.0004634 |
| 3  | rs4582061  | 134920716 | TF            | 27208 base upstream     | q22.1  | AG | 0.0489 | 1.489 | 0.0004641 |
| 12 | rs6580809  | 49895867  | POU6F1        | intron 10               | q13.13 | CT | 0.3455 | 0.818 | 0.0004653 |
| 2  | rs2697239  | 197749763 | ANKRD44       | intron 24               | q33.1  | CT | 0.0342 | 0.582 | 0.0004656 |
| 6  | rs1900554  | 25265596  | LRRC16        | 122030 base upstream    | p22.2  | CT | 0.1879 | 0.794 | 0.0004656 |
| 9  | rs10811225 | 19652307  | SLC24A2       | intron 9                | p22.1  | AG | 0.3901 | 0.829 | 0.0004657 |
| 2  | rs2450280  | 107974450 | SLC5A7        | intron 2                | q12.3  | CT | 0.8031 | 1.281 | 0.0004665 |
| 19 | rs4433935  | 13277280  | CACNA1A       | intron 32               | p13.13 | CT | 0.5924 | 0.832 | 0.0004669 |
| 12 | rs935537   | 9923537   | CLEC2B        | 9812 base downstream    | p13.31 | CG | 0.7193 | 0.817 | 0.0004671 |
| 2  | rs2354378  | 51618920  | NRXN1         | 505742 base downstream  | p16.3  | CT | 0.5812 | 0.822 | 0.0004672 |
| 2  | rs7579884  | 229854835 | PID1          | 10534 base downstream   | q36.3  | AG | 0.9278 | 0.704 | 0.0004675 |
| 7  | rs1689299  | 52977371  | DKFZp564N247z | 93471 base upstream     | p12.1  | AT | 0.8501 | 0.775 | 0.000468  |
| 10 | rs11591352 | 110514731 | XPNPEP1       | 1099782 base upstream   | q25.1  | GT | 0.8073 | 1.281 | 0.000469  |
| 3  | rs16840699 | 134920291 | TF            | 27633 base upstream     | q22.1  | CT | 0.9511 | 0.672 | 0.0004692 |
| 2  | rs2175824  | 111308878 | ACOXL         | intron 9                | q13    | GT | 0.6206 | 1.234 | 0.0004704 |
| 10 | rs3934875  | 110674541 | XPNPEP1       | 939972 base upstream    | q25.1  | AG | 0.8189 | 1.273 | 0.0004717 |
| 2  | rs13417566 | 111309077 | ACOXL         | intron 9                | q13    | AC | 0.3795 | 0.811 | 0.0004718 |
| 19 | rs4499352  | 13277350  | CACNA1A       | intron 32               | p13.13 | GT | 0.4076 | 1.202 | 0.0004725 |
| 11 | rs1384641  | 18845442  | MRGPRX1       | 66493 base upstream     | p15.1  | CG | 0.8914 | 0.746 | 0.0004734 |
| 11 | rs1384642  | 18846017  | MRGPRX1       | 65918 base upstream     | p15.1  | AG | 0.1086 | 1.34  | 0.0004743 |
| 13 | rs2038712  | 21757616  | FGF9          | 583432 base downstream  | q12.11 | CT | 0.5874 | 0.826 | 0.0004761 |
| 3  | rs11130939 | 63493103  | SYNPR         | intron 2                | p14.2  | GT | 0.8105 | 1.278 | 0.0004767 |
| 20 | rs6019750  | 47380876  | KCNB1         | 41035 base upstream     | q13.13 | CG | 0.9258 | 0.695 | 0.0004767 |
| 13 | rs17083114 | 67594394  | PCDH9         | 891930 base downstream  | q21.33 | CT | 0.974  | 1.814 | 0.0004767 |

|    |            |           |          |                        |        |    |        |       |           |
|----|------------|-----------|----------|------------------------|--------|----|--------|-------|-----------|
| 12 | rs576601   | 9937319   | CLEC2B   | 23594 base downstream  | p13.31 | AC | 0.7262 | 0.817 | 0.0004771 |
| 13 | rs17083120 | 67598341  | PCDH9    | 895877 base downstream | q21.33 | CT | 0.974  | 1.813 | 0.0004771 |
| 13 | rs17083124 | 67599095  | PCDH9    | 896631 base downstream | q21.33 | AT | 0.974  | 1.813 | 0.0004774 |
| 14 | rs10143992 | 31528650  | ARHGAP5  | 87595 base upstream    | q12    | CG | 0.2142 | 1.268 | 0.0004775 |
| 4  | rs17055545 | 171439939 | AADAT    | 191992 base downstream | q33    | GT | 0.0241 | 1.786 | 0.0004778 |
| 21 | rs2824148  | 17228121  | C21orf34 | 326708 base downstream | q21.1  | AG | 0.2779 | 1.224 | 0.0004779 |
| 6  | rs2844845  | 29820738  | HLA-F    | 18456 base downstream  | p22.1  | AT | 0.1651 | 1.276 | 0.0004781 |
| 12 | rs2936206  | 17411380  | FLJ22655 | 713689 base upstream   | p12.3  | AG | 0.5405 | 1.2   | 0.0004782 |
| 2  | rs1226946  | 229856782 | PID1     | 12481 base downstream  | q36.3  | CT | 0.0721 | 1.419 | 0.0004786 |
| 18 | rs1349930  | 48306727  | DCC      | intron 1               | q21.2  | CG | 0.8447 | 1.297 | 0.0004802 |
| 9  | rs7860486  | 70347279  | C9orf71  | 1676 base downstream   | q13    | AC | 0.1443 | 0.767 | 0.0004807 |
| 12 | rs10751693 | 130839269 | SFRS8    | intron 15              | q24.33 | AG | 0.3851 | 0.83  | 0.0004808 |
| 1  | rs915180   | 154345707 | LMNA     | 5377 base upstream     | q22    | CT | 0.6107 | 0.82  | 0.000482  |
| 13 | rs2325107  | 67611790  | PCDH9    | 909326 base downstream | q21.33 | AG | 0.026  | 0.552 | 0.0004827 |
| 13 | rs11840273 | 67606518  | PCDH9    | 904054 base downstream | q21.33 | AG | 0.026  | 0.552 | 0.0004828 |
| 4  | rs4434285  | 65093689  | SRD5A2L2 | 135916 base downstream | q13.1  | AT | 0.8118 | 0.787 | 0.0004832 |
| 13 | rs17083164 | 67660291  | PCDH9    | 957827 base downstream | q21.33 | CT | 0.974  | 1.812 | 0.0004833 |
| 20 | rs6019751  | 47381122  | KCNB1    | 40789 base upstream    | q13.13 | CT | 0.9258 | 0.696 | 0.0004843 |
| 3  | rs539967   | 178788491 | TBL1XR1  | 390749 base downstream | q26.32 | AC | 0.5946 | 1.214 | 0.0004847 |
| 2  | rs2698024  | 51640024  | NRXN1    | 526846 base downstream | p16.3  | AG | 0.4523 | 1.201 | 0.0004862 |
| 8  | rs10097898 | 14884772  | SGCZ     | intron 7               | p22    | AG | 0.4142 | 1.223 | 0.0004863 |
| 6  | rs12196767 | 51884494  | PKHD1    | intron 28              | p12.2  | CT | 0.1897 | 0.785 | 0.0004865 |
| 14 | rs1952969  | 31527434  | ARHGAP5  | 88811 base upstream    | q12    | GT | 0.7857 | 0.789 | 0.0004865 |
| 1  | rs17514245 | 167156181 | ATP1B1   | 186389 base upstream   | q24.2  | AG | 0.8966 | 1.357 | 0.0004871 |
| 2  | rs2715057  | 51649455  | NRXN1    | 536277 base downstream | p16.3  | CT | 0.5524 | 0.831 | 0.0004873 |
| 12 | rs11059127 | 126488790 | SLC15A4  | 1354925 base upstream  | q24.32 | GT | 0.7388 | 1.238 | 0.0004875 |
| 1  | rs7530207  | 167157044 | ATP1B1   | 185526 base upstream   | q24.2  | CG | 0.1035 | 0.736 | 0.0004882 |
| 14 | rs8017647  | 31526109  | ARHGAP5  | 90136 base upstream    | q12    | CT | 0.2143 | 1.266 | 0.0004885 |
| 12 | rs6598153  | 130815441 | SFRS8    | intron 12              | q24.33 | CT | 0.3821 | 0.831 | 0.0004885 |
| 8  | rs10099567 | 1780249   | ARHGEF10 | intron 2               | p23.3  | AG | 0.5677 | 0.829 | 0.0004886 |
| 17 | rs8076116  | 47289896  | CA10     | intron 6               | q21.33 | GT | 0.0405 | 1.565 | 0.0004893 |
| 21 | rs7282020  | 17225906  | C21orf34 | 324493 base downstream | q21.1  | AC | 0.2725 | 1.229 | 0.0004896 |
| 10 | rs12258030 | 110686488 | XPNPEP1  | 928025 base upstream   | q25.1  | AG | 0.819  | 1.272 | 0.000491  |
| 11 | rs12795402 | 32212512  | RCN1     | 128859 base downstream | p13    | CT | 0.6751 | 1.218 | 0.0004917 |
| 4  | rs2358469  | 149810031 | NR3C2    | 226938 base downstream | q31.23 | AG | 0.587  | 0.818 | 0.0004919 |
| 2  | rs11680441 | 51620902  | NRXN1    | 507724 base downstream | p16.3  | AG | 0.4183 | 1.213 | 0.0004924 |
| 12 | rs12424558 | 88790264  | ATP2B1   | 216289 base downstream | q21.33 | CG | 0.9017 | 0.725 | 0.0004944 |

|    |            |           |               |                         |        |    |        |       |           |
|----|------------|-----------|---------------|-------------------------|--------|----|--------|-------|-----------|
| 13 | rs17083147 | 67631961  | PCDH9         | 929497 base downstream  | q21.33 | CT | 0.0261 | 0.553 | 0.0004947 |
| 13 | rs9510084  | 21757893  | FGF9          | 583709 base downstream  | q12.11 | AC | 0.4128 | 1.21  | 0.0004957 |
| 2  | rs1528811  | 51649652  | NRXN1         | 536474 base downstream  | p16.3  | CT | 0.5526 | 0.832 | 0.0004971 |
| 2  | rs1226936  | 229863370 | PID1          | 19069 base downstream   | q36.3  | GT | 0.928  | 0.706 | 0.000499  |
| 9  | rs1335406  | 119035785 | ASTN2         | intron 20               | q33.1  | AT | 0.9419 | 0.668 | 0.0004992 |
| 16 | rs7202219  | 7375184   | A2BP1         | intron 4                | p13.2  | AT | 0.9086 | 0.732 | 0.0004997 |
| 2  | rs1528810  | 51649771  | NRXN1         | 536593 base downstream  | p16.3  | CT | 0.5527 | 0.832 | 0.0005008 |
| 16 | rs7202208  | 7375166   | A2BP1         | intron 4                | p13.2  | AG | 0.9085 | 0.732 | 0.0005012 |
| 2  | rs1528809  | 51649917  | NRXN1         | 536739 base downstream  | p16.3  | AG | 0.4472 | 1.203 | 0.0005015 |
| 16 | rs7202052  | 7375151   | A2BP1         | intron 4                | p13.2  | AG | 0.9085 | 0.732 | 0.0005033 |
| 2  | rs4340504  | 232140542 | MGC35154      | 25313 base upstream     | q37.1  | AC | 0.0828 | 1.386 | 0.0005041 |
| 7  | rs11769082 | 52974032  | DKFZp564N247z | 96810 base upstream     | p12.1  | CT | 0.1532 | 1.289 | 0.0005043 |
| 1  | rs11583110 | 116595268 | C1orf161      | 115884 base downstream  | p13.1  | AC | 0.3325 | 1.217 | 0.0005043 |
| 4  | rs931771   | 109392362 | LEF1          | 83335 base downstream   | q25    | CT | 0.734  | 1.247 | 0.0005089 |
| 2  | rs2698011  | 51651289  | NRXN1         | 538111 base downstream  | p16.3  | GT | 0.553  | 0.832 | 0.0005135 |
| 16 | rs1424241  | 70636408  | HP            | 9600 base upstream      | q22.3  | AG | 0.1816 | 0.786 | 0.0005142 |
| 11 | rs360118   | 9802854   | SBF2          | intron 12               | p15.4  | CG | 0.3518 | 1.22  | 0.0005144 |
| 3  | rs16849682 | 141211649 | CLSTN2        | intron 1                | q23    | CT | 0.9409 | 0.672 | 0.0005145 |
| 12 | rs11059124 | 126488548 | SLC15A4       | 1355167 base upstream   | q24.32 | AG | 0.7381 | 1.238 | 0.0005146 |
| 1  | rs284172   | 91987439  | TGFBR3        | intron 13               | p22.2  | AT | 0.1544 | 0.761 | 0.000516  |
| 11 | rs924111   | 10721194  | CTR9          | 8192 base upstream      | p15.3  | AG | 0.592  | 1.207 | 0.0005163 |
| 4  | rs10518071 | 71148222  | CSN3          | intron 3                | q13.3  | CT | 0.1328 | 0.766 | 0.0005164 |
| 4  | rs6811318  | 71149965  | CSN3          | intron 4                | q13.3  | CT | 0.8672 | 1.306 | 0.0005171 |
| 2  | rs6732415  | 44191376  | PPM1B         | 58127 base upstream     | p21    | AG | 0.0209 | 1.927 | 0.0005175 |
| 7  | rs1208998  | 91252060  | MTERF         | 87896 base upstream     | q21.2  | CT | 0.9431 | 0.669 | 0.0005176 |
| 4  | rs3775739  | 71149649  | CSN3          | EXON 4                  | q13.3  | AG | 0.1328 | 0.766 | 0.0005177 |
| 16 | rs7184072  | 7375088   | A2BP1         | intron 4                | p13.2  | CT | 0.0918 | 1.366 | 0.0005181 |
| 10 | rs3847404  | 30429219  | KIAA1462      | 52413 base downstream   | p11.23 | CT | 0.6388 | 0.828 | 0.0005183 |
| 15 | rs11852644 | 90026124  | SLCO3A1       | 171825 base upstream    | q26.1  | AT | 0.0843 | 1.39  | 0.0005187 |
| 4  | rs6811366  | 71150032  | CSN3          | intron 4                | q13.3  | CT | 0.8672 | 1.306 | 0.0005189 |
| 10 | rs6584909  | 110687591 | XPNPEP1       | 926922 base upstream    | q25.1  | AG | 0.819  | 1.27  | 0.0005189 |
| 11 | rs10742274 | 32212217  | RCN1          | 128564 base downstream  | p13    | CT | 0.325  | 0.822 | 0.0005213 |
| 6  | rs11752102 | 25262375  | LRRC16        | 125251 base upstream    | p22.2  | AG | 0.8065 | 1.282 | 0.0005216 |
| 8  | rs1379440  | 135092624 | ST3GAL1       | 439280 base downstream  | q24.22 | CT | 0.5707 | 1.202 | 0.0005232 |
| 6  | rs2517830  | 29937545  | HLA-G         | 30667 base downstream   | p21.33 | GT | 0.0545 | 1.531 | 0.0005238 |
| 5  | rs4700651  | 64063348  | P18SRP        | intron 2                | q12.3  | AT | 0.5345 | 0.835 | 0.000524  |
| 14 | rs162637   | 82831246  | SEL1L         | 1761360 base downstream | q31.2  | CT | 0.8043 | 0.79  | 0.0005241 |

|    |            |           |               |                         |        |    |        |       |           |
|----|------------|-----------|---------------|-------------------------|--------|----|--------|-------|-----------|
| 21 | rs8129059  | 19396021  | PRSS7         | 698177 base downstream  | q21.1  | CT | 0.6696 | 0.808 | 0.0005253 |
| 4  | rs11099460 | 82319684  | PRKG2         | intron 17               | q21.21 | AC | 0.0631 | 1.471 | 0.0005287 |
| 2  | rs10200921 | 210508108 | RPE           | 67488 base upstream     | q34    | AG | 0.1474 | 1.319 | 0.0005288 |
| 10 | rs473195   | 30510832  | PAPD1         | 130932 base upstream    | p11.23 | CT | 0.7163 | 0.819 | 0.0005303 |
| 2  | rs2715076  | 51652775  | NRXN1         | 539597 base downstream  | p16.3  | AC | 0.4466 | 1.202 | 0.0005304 |
| 11 | rs4757732  | 18858429  | MRGPRX1       | 53506 base upstream     | p15.1  | CT | 0.8912 | 0.748 | 0.0005317 |
| 10 | rs11595032 | 110687958 | XPNPEP1       | 926555 base upstream    | q25.1  | AT | 0.1811 | 0.788 | 0.0005317 |
| 4  | rs11737486 | 136740556 | PABPC4L       | 1398203 base downstream | q28.3  | AG | 0.1319 | 1.331 | 0.0005318 |
| 13 | rs1570309  | 28458146  | KIAA0774      | 38601 base upstream     | q12.3  | AG | 0.8985 | 0.734 | 0.0005338 |
| 6  | rs9397709  | 154732717 | PIP3-E        | 13125 base downstream   | q25.2  | CT | 0.9475 | 1.546 | 0.000534  |
| 2  | rs4449121  | 232078303 | MGC43122      | 3077 base upstream      | q37.1  | AC | 0.9163 | 0.705 | 0.0005343 |
| 6  | rs4960167  | 6095762   | F13A1         | intron 1                | p25.1  | CT | 0.8313 | 0.787 | 0.0005346 |
| 4  | rs2270269  | 8631852   | GPR78         | 1338 base upstream      | p16.1  | CT | 0.5652 | 1.199 | 0.0005356 |
| 6  | rs2517897  | 29908080  | HLA-G         | 1202 base downstream    | p21.33 | AC | 0.1509 | 0.768 | 0.0005359 |
| 11 | rs10742273 | 32212187  | RCN1          | 128534 base downstream  | p13    | CG | 0.6749 | 1.217 | 0.0005368 |
| 4  | rs2270270  | 8631775   | GPR78         | 1415 base upstream      | p16.1  | CG | 0.5652 | 1.199 | 0.0005383 |
| 6  | rs9362321  | 87192966  | HTR1E         | 511162 base upstream    | q14.3  | CT | 0.8437 | 0.783 | 0.0005398 |
| 1  | rs589176   | 4560412   | AJAP1         | 54552 base upstream     | p36.32 | AG | 0.4638 | 0.827 | 0.0005409 |
| 2  | rs7572242  | 128341634 | MGC4268       | intron 2                | q14.3  | CT | 0.5889 | 0.829 | 0.000542  |
| 5  | rs4463179  | 13558432  | DNAH5         | 185004 base upstream    | p15.2  | AG | 0.0936 | 1.35  | 0.0005427 |
| 10 | rs7091393  | 110512008 | XPNPEP1       | 1102505 base upstream   | q25.1  | CT | 0.821  | 1.286 | 0.0005442 |
| 6  | rs9384205  | 154734121 | PIP3-E        | 14529 base downstream   | q25.2  | CT | 0.0527 | 0.649 | 0.0005446 |
| 3  | rs9852024  | 22446750  | ZNF659        | 678930 base downstream  | p24.3  | AT | 0.1627 | 1.296 | 0.0005447 |
| 11 | rs7124928  | 32211971  | RCN1          | 128318 base downstream  | p13    | CT | 0.3251 | 0.822 | 0.0005448 |
| 18 | rs1031062  | 48292120  | DCC           | intron 1                | q21.2  | GT | 0.1523 | 0.771 | 0.0005456 |
| 6  | rs2129859  | 94798859  | EPHA7         | 612866 base downstream  | q16.1  | AC | 0.4233 | 1.199 | 0.0005466 |
| 6  | rs9397710  | 154734212 | PIP3-E        | 14620 base downstream   | q25.2  | AC | 0.0527 | 0.649 | 0.0005467 |
| 7  | rs10250470 | 52238030  | DKFZp564N2472 | 832812 base upstream    | p12.1  | AG | 0.6725 | 0.821 | 0.0005488 |
| 6  | rs9371793  | 154734269 | PIP3-E        | 14677 base downstream   | q25.2  | CT | 0.9472 | 1.54  | 0.0005489 |
| 6  | rs1318638  | 30235852  | TRIM10        | intron 6                | p21.33 | CT | 0.9504 | 0.665 | 0.0005503 |
| 2  | rs10469900 | 38220587  | CYP1B1        | 63791 base downstream   | p22.2  | CT | 0.2062 | 1.247 | 0.0005506 |
| 3  | rs2362755  | 24691672  | THRB          | 180355 base downstream  | p24.2  | GT | 0.5623 | 1.201 | 0.0005506 |
| 20 | rs6099650  | 55492405  | HMG1L1        | 4450 base upstream      | q13.31 | CT | 0.4528 | 0.835 | 0.0005523 |
| 6  | rs2171518  | 94798998  | EPHA7         | 613005 base downstream  | q16.1  | CT | 0.5767 | 0.834 | 0.0005535 |
| 12 | rs10859960 | 94742289  | NTN4          | 33622 base downstream   | q22    | AG | 0.2611 | 1.225 | 0.0005535 |
| 6  | rs12212092 | 30236421  | TRIM10        | EXON 7                  | p21.33 | CT | 0.9505 | 0.665 | 0.0005537 |
| 11 | rs4325289  | 18844035  | MRGPRX1       | 67900 base upstream     | p15.1  | CG | 0.1081 | 1.336 | 0.0005543 |

|    |            |           |               |                        |        |    |        |       |           |
|----|------------|-----------|---------------|------------------------|--------|----|--------|-------|-----------|
| 20 | rs2182970  | 55505059  | CTCFL         | 570 base upstream      | q13.31 | GT | 0.5702 | 0.834 | 0.0005549 |
| 10 | rs7073756  | 85953055  | PCDH21        | intron 8               | q23.1  | CT | 0.2404 | 0.804 | 0.0005556 |
| 12 | rs10777742 | 94741290  | NTN4          | 32623 base downstream  | q22    | CT | 0.7389 | 0.816 | 0.0005565 |
| 2  | rs12463442 | 111311960 | ACOXL         | intron 9               | q13    | AG | 0.6188 | 1.225 | 0.0005566 |
| 11 | rs926968   | 32207354  | RCN1          | 123701 base downstream | p13    | CT | 0.6748 | 1.216 | 0.0005568 |
| 12 | rs10859959 | 94740811  | NTN4          | 32144 base downstream  | q22    | CT | 0.2611 | 1.225 | 0.0005574 |
| 6  | rs6941417  | 25260653  | LRRC16        | 126973 base upstream   | p22.2  | AG | 0.1943 | 0.781 | 0.0005585 |
| 6  | rs9383704  | 154735267 | PIP3-E        | 15675 base downstream  | q25.2  | AG | 0.9471 | 1.536 | 0.0005596 |
| 10 | rs7070406  | 110697815 | XPNPEP1       | 916698 base upstream   | q25.1  | AT | 0.8188 | 1.268 | 0.0005598 |
| 12 | rs7134181  | 94738331  | NTN4          | 29664 base downstream  | q22    | CT | 0.7389 | 0.816 | 0.0005606 |
| 12 | rs7955502  | 93474128  | TMCC3         | 12051 base upstream    | q22    | AC | 0.1052 | 1.341 | 0.0005609 |
| 10 | rs6583995  | 97100869  | SORBS1        | intron 8               | q23.33 | CT | 0.2961 | 1.219 | 0.0005617 |
| 10 | rs12780390 | 30332480  | KIAA1462      | 10909 base upstream    | p11.23 | CT | 0.5583 | 0.827 | 0.0005623 |
| 13 | rs9510085  | 21757961  | FGF9          | 583777 base downstream | q12.11 | GT | 0.583  | 0.827 | 0.0005625 |
| 10 | rs12779954 | 30332299  | KIAA1462      | 11090 base upstream    | p11.23 | AT | 0.5584 | 0.827 | 0.0005627 |
| 6  | rs9461270  | 26652089  | HMGNA4        | intron 1               | p22.1  | AG | 0.5732 | 0.826 | 0.0005649 |
| 1  | rs17111725 | 55459204  | USP24         | 5854 base downstream   | p32.3  | AG | 0.7537 | 0.809 | 0.0005653 |
| 6  | rs590701   | 94819838  | EPHA7         | 633845 base downstream | q16.1  | GT | 0.4258 | 1.2   | 0.0005654 |
| 8  | rs16904845 | 134268958 | WISP1         | 3535 base upstream     | q24.22 | CT | 0.3404 | 0.812 | 0.0005659 |
| 12 | rs7307769  | 94730019  | NTN4          | 21352 base downstream  | q22    | AG | 0.261  | 1.225 | 0.0005661 |
| 12 | rs10859956 | 94729110  | NTN4          | 20443 base downstream  | q22    | CT | 0.261  | 1.225 | 0.0005678 |
| 2  | rs1919433  | 51644884  | NRXN1         | 531706 base downstream | p16.3  | CG | 0.4522 | 1.199 | 0.000569  |
| 2  | rs17744093 | 29148258  | FLJ34931      | EXON 2                 | p23.2  | CG | 0.2342 | 1.245 | 0.0005691 |
| 6  | rs9371795  | 154735852 | PIP3-E        | 16260 base downstream  | q25.2  | CT | 0.947  | 1.533 | 0.0005694 |
| 1  | rs1105101  | 110906436 | KCNA2         | 40862 base upstream    | p13.3  | CG | 0.7411 | 0.815 | 0.0005698 |
| 12 | rs12582105 | 94722758  | NTN4          | 14091 base downstream  | q22    | AG | 0.261  | 1.225 | 0.0005705 |
| 11 | rs926967   | 32207798  | RCN1          | 124145 base downstream | p13    | AG | 0.3252 | 0.823 | 0.0005706 |
| 6  | rs10944713 | 94818161  | EPHA7         | 632168 base downstream | q16.1  | AT | 0.4262 | 1.2   | 0.0005708 |
| 6  | rs2535660  | 94838264  | EPHA7         | 652271 base downstream | q16.1  | CT | 0.5832 | 0.834 | 0.0005708 |
| 10 | rs11596345 | 110692416 | XPNPEP1       | 922097 base upstream   | q25.1  | AG | 0.8188 | 1.267 | 0.0005713 |
| 2  | rs4849147  | 113545707 | IL1F10        | intron 1               | q13    | AT | 0.2933 | 1.234 | 0.000572  |
| 1  | rs284170   | 91987216  | TGFBR3        | intron 13              | p22.2  | CT | 0.8459 | 1.319 | 0.0005723 |
| 13 | rs9550833  | 21758087  | FGF9          | 583903 base downstream | q12.11 | AC | 0.5829 | 0.828 | 0.0005724 |
| 6  | rs9384206  | 154735871 | PIP3-E        | 16279 base downstream  | q25.2  | CT | 0.9469 | 1.532 | 0.0005733 |
| 7  | rs11238186 | 52237378  | DKFZp564N247z | 833464 base upstream   | p12.1  | AC | 0.3284 | 1.217 | 0.0005735 |
| 1  | rs6537671  | 110908053 | KCNA2         | 39245 base upstream    | p13.3  | CT | 0.2589 | 1.226 | 0.0005741 |
| 10 | rs6481661  | 30520525  | PAPD1         | 121239 base upstream   | p11.23 | CT | 0.7237 | 0.819 | 0.0005746 |

|    |            |           |           |                         |        |    |        |       |           |
|----|------------|-----------|-----------|-------------------------|--------|----|--------|-------|-----------|
| 5  | rs6449751  | 64072297  | P18SRP    | intron 2                | q12.3  | CG | 0.4653 | 1.196 | 0.0005746 |
| 4  | rs11133559 | 58909359  | IGFBP7    | 1238063 base downstream | q12    | AC | 0.2759 | 0.812 | 0.0005749 |
| 9  | rs10120859 | 70346115  | C9orf71   | 512 base downstream     | q13    | CT | 0.1512 | 0.77  | 0.0005752 |
| 4  | rs12511263 | 58908862  | IGFBP7    | 1237566 base downstream | q12    | AG | 0.2759 | 0.812 | 0.0005762 |
| 2  | rs11126291 | 70819307  | ADD2      | intron 15               | p13.3  | GT | 0.0512 | 0.661 | 0.0005767 |
| 3  | rs517729   | 54683416  | CACNA2D3  | intron 11               | p14.3  | AG | 0.5107 | 0.832 | 0.0005768 |
| 2  | rs1997326  | 51622700  | NRXN1     | 509522 base downstream  | p16.3  | GT | 0.5802 | 0.829 | 0.0005768 |
| 8  | rs7465458  | 54439800  | OPRK1     | 113053 base downstream  | q11.23 | AG | 0.8362 | 1.283 | 0.0005778 |
| 11 | rs11601578 | 103266219 | PDGFD     | 16905 base upstream     | q22.3  | CT | 0.6882 | 1.231 | 0.0005781 |
| 1  | rs241221   | 4508910   | AJAP1     | 106054 base upstream    | p36.32 | CT | 0.6104 | 1.208 | 0.0005787 |
| 21 | rs2837183  | 40057208  | LOC150084 | intron 2                | q22.2  | CT | 0.3627 | 1.216 | 0.0005791 |
| 2  | rs11676521 | 229863870 | PID1      | 19569 base downstream   | q36.3  | GT | 0.9284 | 0.71  | 0.0005803 |
| 2  | rs17198619 | 181898803 | ITGA4     | 131060 base upstream    | q31.3  | GT | 0.9023 | 0.733 | 0.0005806 |
| 2  | rs10185903 | 229840402 | PID1      | intron 3                | q36.3  | CT | 0.145  | 1.284 | 0.0005807 |
| 13 | rs9506819  | 21758269  | FGF9      | 584085 base downstream  | q12.11 | GT | 0.5829 | 0.828 | 0.0005807 |
| 13 | rs4770264  | 21758866  | FGF9      | 584682 base downstream  | q12.11 | AG | 0.4135 | 1.207 | 0.0005808 |
| 2  | rs3755352  | 70823291  | ADD2      | intron 15               | p13.3  | AT | 0.9488 | 1.513 | 0.0005812 |
| 1  | rs504274   | 4548433   | AJAP1     | 66531 base upstream     | p36.32 | CT | 0.0733 | 0.706 | 0.0005827 |
| 6  | rs1018846  | 30245628  | TRIM15    | intron 4                | p21.33 | AG | 0.0492 | 1.505 | 0.0005831 |
| 4  | rs4865328  | 58908498  | IGFBP7    | 1237202 base downstream | q12    | CT | 0.7238 | 1.231 | 0.0005831 |
| 16 | rs3924628  | 8571064   | C16orf68  | 51963 base upstream     | p13.2  | AG | 0.3747 | 1.202 | 0.0005843 |
| 4  | rs10517438 | 58908183  | IGFBP7    | 1236887 base downstream | q12    | AT | 0.7238 | 1.231 | 0.0005847 |
| 6  | rs4707818  | 94778822  | EPHA7     | 592829 base downstream  | q16.1  | CG | 0.5713 | 0.834 | 0.0005854 |
| 22 | rs5992433  | 17962066  | CLDN5     | 69206 base downstream   | q11.21 | CT | 0.4587 | 1.199 | 0.0005857 |
| 4  | rs17029520 | 154177648 | KIAA1727  | 57350 base downstream   | q31.3  | CT | 0.6908 | 0.827 | 0.0005859 |
| 10 | rs11592721 | 110687487 | XPNPEP1   | 927026 base upstream    | q25.1  | AG | 0.1598 | 0.767 | 0.0005865 |
| 3  | rs9861611  | 22448096  | ZNF659    | 680276 base downstream  | p24.3  | CT | 0.1719 | 1.277 | 0.000587  |
| 21 | rs2837232  | 40101083  | LOC150084 | 5190 base downstream    | q22.2  | AG | 0.3168 | 1.211 | 0.0005875 |
| 4  | rs7656126  | 183403974 | ODZ3      | 78156 base upstream     | q35.1  | GT | 0.7159 | 1.226 | 0.0005878 |
| 8  | rs11998140 | 135092194 | ST3GAL1   | 438850 base downstream  | q24.22 | AC | 0.4293 | 0.834 | 0.0005879 |
| 11 | rs2418584  | 32208659  | RCN1      | 125006 base downstream  | p13    | CT | 0.6748 | 1.215 | 0.0005883 |
| 21 | rs12626544 | 40059369  | LOC150084 | EXON 3                  | q22.2  | AG | 0.6375 | 0.823 | 0.0005913 |
| 5  | rs106451   | 104076769 | NUDT12    | 1150380 base downstream | q21.2  | AC | 0.1654 | 1.272 | 0.0005916 |
| 8  | rs13261120 | 14876643  | SGCZ      | intron 7                | p22    | CT | 0.4425 | 1.217 | 0.0005917 |
| 2  | rs13429819 | 64137490  | PELI1     | 36009 base upstream     | p14    | AG | 0.9327 | 0.704 | 0.0005918 |
| 2  | rs1446521  | 113543867 | IL1F10    | intron 1                | q13    | AG | 0.7086 | 0.812 | 0.0005927 |
| 5  | rs325529   | 104077128 | NUDT12    | 1150739 base downstream | q21.2  | CT | 0.1654 | 1.272 | 0.0005929 |

|    |            |           |           |                         |        |    |        |       |           |
|----|------------|-----------|-----------|-------------------------|--------|----|--------|-------|-----------|
| 5  | rs325527   | 104076454 | NUDT12    | 1150065 base downstream | q21.2  | CT | 0.8346 | 0.786 | 0.0005929 |
| 3  | rs11716879 | 22448847  | ZNF659    | 681027 base downstream  | p24.3  | AT | 0.1723 | 1.277 | 0.0005931 |
| 10 | rs17778715 | 110707237 | XPNPEP1   | 907276 base upstream    | q25.1  | CT | 0.1812 | 0.79  | 0.0005932 |
| 17 | rs4575596  | 68389374  | SLC39A11  | intron 5                | q24.3  | CT | 0.3942 | 1.199 | 0.0005943 |
| 10 | rs11007929 | 30526790  | PAPD1     | 114974 base upstream    | p11.23 | CT | 0.7235 | 0.82  | 0.0005946 |
| 2  | rs12463526 | 111312209 | ACOXL     | intron 9                | q13    | AG | 0.6185 | 1.219 | 0.0005946 |
| 5  | rs325530   | 104077349 | NUDT12    | 1150960 base downstream | q21.2  | GT | 0.8345 | 0.786 | 0.0005947 |
| 6  | rs583000   | 94846081  | EPHA7     | 660088 base downstream  | q16.1  | CT | 0.4168 | 1.198 | 0.0005951 |
| 2  | rs7560803  | 64135002  | VPS54     | 35284 base downstream   | p14    | AG | 0.0673 | 1.419 | 0.0005955 |
| 10 | rs11596046 | 110734026 | XPNPEP1   | 880487 base upstream    | q25.1  | AG | 0.1808 | 0.79  | 0.000596  |
| 16 | rs2967303  | 47659380  | CBLN1     | 210821 base upstream    | q12.1  | CG | 0.4709 | 0.827 | 0.0005961 |
| 5  | rs325526   | 104074988 | NUDT12    | 1148599 base downstream | q21.2  | AG | 0.8347 | 0.786 | 0.0005963 |
| 2  | rs6754229  | 229839689 | PID1      | intron 3                | q36.3  | CT | 0.145  | 1.283 | 0.0005967 |
| 22 | rs5993715  | 17961946  | CLDN5     | 69086 base downstream   | q11.21 | GT | 0.4587 | 1.199 | 0.0005967 |
| 8  | rs1519150  | 12893231  | C8orf79   | intron 2                | p22    | AT | 0.265  | 0.814 | 0.0005968 |
| 2  | rs6724667  | 113506112 | IL1F8     | intron 5                | q13    | AG | 0.6942 | 0.817 | 0.0005969 |
| 6  | rs16890179 | 25277765  | LRRC16    | 109861 base upstream    | p22.2  | CT | 0.1891 | 0.793 | 0.0005972 |
| 5  | rs325531   | 104077611 | NUDT12    | 1151222 base downstream | q21.2  | AG | 0.8345 | 0.786 | 0.0005973 |
| 1  | rs915179   | 154344873 | LMNA      | 6211 base upstream      | q22    | AG | 0.6103 | 0.827 | 0.0005974 |
| 15 | rs1435399  | 86281541  | NTRK3     | intron 5                | q25.3  | AT | 0.1816 | 0.78  | 0.0005976 |
| 4  | rs10012544 | 154177907 | KIAA1727  | 57609 base downstream   | q31.3  | AT | 0.3092 | 1.209 | 0.0005979 |
| 22 | rs5993714  | 17961830  | CLDN5     | 68970 base downstream   | q11.21 | AG | 0.4587 | 1.199 | 0.0005984 |
| 2  | rs2118204  | 128340581 | MGC4268   | intron 1                | q14.3  | CT | 0.4046 | 1.203 | 0.0005991 |
| 10 | rs17701356 | 110734457 | XPNPEP1   | 880056 base upstream    | q25.1  | AG | 0.1808 | 0.79  | 0.0005993 |
| 21 | rs2837178  | 40054313  | LOC150084 | intron 2                | q22.2  | AG | 0.3631 | 1.216 | 0.0005993 |
| 11 | rs1998003  | 32209862  | RCN1      | 126209 base downstream  | p13    | AC | 0.6748 | 1.214 | 0.0005995 |
| 5  | rs895658   | 2547273   | IRX2      | 252606 base upstream    | p15.33 | CT | 0.6315 | 1.206 | 0.0005996 |
| 5  | rs325532   | 104077750 | NUDT12    | 1151361 base downstream | q21.2  | CT | 0.1655 | 1.272 | 0.0005997 |
| 10 | rs10509885 | 110729755 | XPNPEP1   | 884758 base upstream    | q25.1  | CT | 0.8193 | 1.266 | 0.0006003 |
| 2  | rs17744052 | 29142915  | FLJ34931  | intron 1                | p23.2  | AG | 0.7694 | 0.81  | 0.0006006 |
| 16 | rs8057663  | 7371378   | A2BP1     | intron 4                | p13.2  | AG | 0.907  | 0.735 | 0.0006012 |
| 10 | rs17779611 | 110734927 | XPNPEP1   | 879586 base upstream    | q25.1  | CT | 0.1808 | 0.79  | 0.0006014 |
| 6  | rs1235830  | 95082112  | EPHA7     | 896119 base downstream  | q16.1  | CT | 0.8463 | 1.287 | 0.0006016 |
| 10 | rs12258219 | 110503646 | XPNPEP1   | 1110867 base upstream   | q25.1  | GT | 0.8297 | 1.291 | 0.0006023 |
| 10 | rs4314990  | 110724687 | XPNPEP1   | 889826 base upstream    | q25.1  | CT | 0.1807 | 0.79  | 0.0006027 |
| 21 | rs2837226  | 40088875  | LOC150084 | intron 8                | q22.2  | AC | 0.3167 | 1.21  | 0.0006032 |
| 10 | rs17779320 | 110723326 | XPNPEP1   | 891187 base upstream    | q25.1  | AG | 0.8193 | 1.266 | 0.0006033 |



|    |            |           |           |                         |        |    |        |       |           |
|----|------------|-----------|-----------|-------------------------|--------|----|--------|-------|-----------|
| 12 | rs3191064  | 13260841  | EMP1      | EXON 5                  | p13.1  | AG | 0.9281 | 1.47  | 0.0006044 |
| 8  | rs1870126  | 135162883 | ZNF406    | 396330 base upstream    | q24.22 | CT | 0.5062 | 0.837 | 0.0006045 |
| 1  | rs7529366  | 55457932  | USP24     | 4582 base downstream    | p32.3  | AG | 0.2445 | 1.236 | 0.0006045 |
| 8  | rs2896732  | 135087435 | ST3GAL1   | 434091 base downstream  | q24.22 | AC | 0.5708 | 1.199 | 0.0006045 |
| 10 | rs11596823 | 110722721 | XPNPEP1   | 891792 base upstream    | q25.1  | AG | 0.8193 | 1.266 | 0.0006048 |
| 2  | rs3791278  | 134742338 | MGAT5     | intron 1                | q21.2  | AG | 0.04   | 1.639 | 0.0006051 |
| 8  | rs1379435  | 135087684 | ST3GAL1   | 434340 base downstream  | q24.22 | CT | 0.5708 | 1.199 | 0.0006051 |
| 21 | rs2837229  | 40095584  | LOC150084 | EXON 9                  | q22.2  | CT | 0.6833 | 0.826 | 0.0006051 |
| 5  | rs325522   | 104073206 | NUDT12    | 1146817 base downstream | q21.2  | CG | 0.1653 | 1.271 | 0.0006061 |
| 20 | rs6025590  | 55503911  | CTCFL     | 1718 base upstream      | q13.31 | AG | 0.3854 | 1.2   | 0.0006063 |
| 12 | rs12423171 | 94615189  | NTN4      | intron 5                | q22    | AG | 0.7696 | 0.805 | 0.0006065 |
| 2  | rs4953309  | 46176270  | PRKCE     | intron 11               | p21    | CG | 0.2159 | 0.796 | 0.0006067 |
| 5  | rs275820   | 64076579  | P18SRP    | intron 3                | q12.3  | GT | 0.5348 | 0.836 | 0.0006069 |
| 15 | rs689991   | 51195489  | ONECUT1   | 325988 base downstream  | q21.3  | AG | 0.7787 | 0.803 | 0.000607  |
| 10 | rs17779136 | 110717700 | XPNPEP1   | 896813 base upstream    | q25.1  | CT | 0.1807 | 0.79  | 0.0006075 |
| 4  | rs11133558 | 58908044  | IGFBP7    | 1236748 base downstream | q12    | AG | 0.7231 | 1.228 | 0.0006079 |
| 1  | rs6703366  | 55446008  | USP24     | intron 64               | p32.3  | GT | 0.2015 | 1.258 | 0.0006079 |
| 12 | rs7966096  | 13268178  | EMP1      | 7204 base downstream    | p13.1  | CT | 0.0662 | 0.662 | 0.0006082 |
| 10 | rs7076888  | 97106209  | SORBS1    | intron 10               | q23.33 | CT | 0.4516 | 1.199 | 0.0006083 |
| 17 | rs4476236  | 68391508  | SLC39A11  | intron 5                | q24.3  | AG | 0.3942 | 1.199 | 0.0006084 |
| 2  | rs10432476 | 151933334 | TNFAIP6   | intron 3                | q23.3  | CT | 0.496  | 1.21  | 0.0006085 |
| 17 | rs4969119  | 68392999  | SLC39A11  | intron 5                | q24.3  | CT | 0.6058 | 0.834 | 0.0006088 |
| 12 | rs17286390 | 94615484  | NTN4      | intron 5                | q22    | AT | 0.7695 | 0.805 | 0.0006089 |
| 2  | rs12993888 | 232134007 | NMUR1     | 30560 base downstream   | q37.1  | AG | 0.0818 | 1.382 | 0.0006091 |
| 4  | rs2090901  | 58906382  | IGFBP7    | 1235086 base downstream | q12    | CT | 0.7231 | 1.228 | 0.0006091 |
| 12 | rs7962943  | 13267994  | EMP1      | 7020 base downstream    | p13.1  | AG | 0.9338 | 1.509 | 0.0006094 |
| 15 | rs584758   | 51195545  | ONECUT1   | 326044 base downstream  | q21.3  | AG | 0.7787 | 0.803 | 0.0006094 |
| 17 | rs4494615  | 68392507  | SLC39A11  | intron 5                | q24.3  | CT | 0.6058 | 0.834 | 0.0006096 |
| 5  | rs325533   | 104080504 | NUDT12    | 1154115 base downstream | q21.2  | AG | 0.1656 | 1.272 | 0.0006099 |
| 10 | rs11597293 | 110736026 | XPNPEP1   | 878487 base upstream    | q25.1  | AC | 0.1807 | 0.79  | 0.0006112 |
| 1  | rs6661281  | 154341469 | LMNA      | 9615 base upstream      | q22    | CT | 0.3898 | 1.209 | 0.0006116 |
| 13 | rs754325   | 46486944  | HTR2A     | 118768 base downstream  | q14.2  | CT | 0.4226 | 0.818 | 0.0006118 |
| 3  | rs884477   | 106367794 | ALCAM     | 200608 base upstream    | q13.11 | AG | 0.1733 | 0.775 | 0.0006121 |
| 5  | rs275823   | 64088118  | P18SRP    | intron 4                | q12.3  | CT | 0.4633 | 1.199 | 0.0006126 |
| 17 | rs4969120  | 68393030  | SLC39A11  | intron 5                | q24.3  | CT | 0.6057 | 0.833 | 0.0006127 |
| 12 | rs2269828  | 45757706  | AMIGO2    | EXON 1                  | q13.11 | AG | 0.3359 | 0.811 | 0.0006132 |
| 5  | rs7715910  | 64084924  | P18SRP    | intron 3                | q12.3  | CT | 0.5364 | 0.835 | 0.0006133 |

|    |            |           |           |                         |        |    |        |       |           |
|----|------------|-----------|-----------|-------------------------|--------|----|--------|-------|-----------|
| 12 | rs2069086  | 13259589  | EMP1      | EXON 5                  | p13.1  | GT | 0.0722 | 0.682 | 0.0006134 |
| 5  | rs1684851  | 73293142  | RGNEF     | 49858 base downstream   | q13.2  | AC | 0.7229 | 1.22  | 0.0006136 |
| 17 | rs4969122  | 68393833  | SLC39A11  | intron 5                | q24.3  | AC | 0.6056 | 0.833 | 0.0006153 |
| 3  | rs12054371 | 63499138  | SYNPR     | intron 2                | p14.2  | CT | 0.8255 | 1.286 | 0.0006157 |
| 5  | rs12514766 | 104072799 | NUDT12    | 1146410 base downstream | q21.2  | AT | 0.1653 | 1.27  | 0.0006159 |
| 17 | rs4969123  | 68393953  | SLC39A11  | intron 5                | q24.3  | AG | 0.6056 | 0.833 | 0.000616  |
| 2  | rs2222779  | 51633654  | NRXN1     | 520476 base downstream  | p16.3  | AG | 0.5723 | 0.834 | 0.0006162 |
| 6  | rs7744573  | 154739604 | PIP3-E    | 20012 base downstream   | q25.2  | CT | 0.0536 | 0.658 | 0.0006164 |
| 7  | rs757393   | 26498670  | SNX10     | 118208 base downstream  | p15.2  | CT | 0.6469 | 0.826 | 0.0006167 |
| 2  | rs3771895  | 151932585 | TNFAIP6   | intron 3                | q23.3  | AG | 0.4959 | 1.209 | 0.0006174 |
| 10 | rs17700585 | 110707994 | XPNPEP1   | 906519 base upstream    | q25.1  | CT | 0.8189 | 1.266 | 0.0006176 |
| 5  | rs325563   | 104086941 | NUDT12    | 1160552 base downstream | q21.2  | AG | 0.1657 | 1.272 | 0.0006177 |
| 17 | rs4969124  | 68393965  | SLC39A11  | intron 5                | q24.3  | CT | 0.3944 | 1.2   | 0.0006183 |
| 17 | rs4570929  | 68394861  | SLC39A11  | intron 5                | q24.3  | AC | 0.3945 | 1.2   | 0.0006188 |
| 17 | rs8078564  | 68394559  | SLC39A11  | intron 5                | q24.3  | CG | 0.6055 | 0.833 | 0.000619  |
| 17 | rs8078727  | 68394639  | SLC39A11  | intron 5                | q24.3  | CT | 0.6055 | 0.833 | 0.0006191 |
| 8  | rs9650382  | 14879068  | SGCZ      | intron 7                | p22    | AG | 0.4391 | 1.219 | 0.0006201 |
| 4  | rs6840036  | 183400923 | ODZ3      | 81207 base upstream     | q35.1  | CT | 0.7351 | 1.232 | 0.0006206 |
| 20 | rs2209885  | 55508313  | CTCFL     | intron 1                | q13.31 | CG | 0.386  | 1.201 | 0.0006209 |
| 17 | rs4503863  | 68395088  | SLC39A11  | intron 5                | q24.3  | CT | 0.6055 | 0.833 | 0.0006211 |
| 8  | rs4876434  | 120078754 | TNFRSF11B | 45190 base downstream   | q24.12 | CT | 0.052  | 1.491 | 0.0006215 |
| 21 | rs2837227  | 40094036  | LOC150084 | intron 8                | q22.2  | CT | 0.6834 | 0.827 | 0.0006216 |
| 2  | rs11678426 | 229865352 | PID1      | 21051 base downstream   | q36.3  | AG | 0.0715 | 1.405 | 0.0006225 |
| 17 | rs7223107  | 68395153  | SLC39A11  | intron 5                | q24.3  | CT | 0.6055 | 0.833 | 0.000623  |
| 2  | rs1922458  | 229868175 | PID1      | 23874 base downstream   | q36.3  | AG | 0.9285 | 0.712 | 0.0006233 |
| 8  | rs13282289 | 27642120  | CCDC25    | 4631 base upstream      | p21.1  | AG | 0.7678 | 1.248 | 0.0006235 |
| 5  | rs6882769  | 40683520  | PTGER4    | 32268 base upstream     | p13.1  | CT | 0.3308 | 0.824 | 0.000624  |
| 6  | rs4716002  | 15947234  | DTNBP1    | 175984 base downstream  | p22.3  | GT | 0.8689 | 0.768 | 0.0006244 |
| 5  | rs325564   | 104087577 | NUDT12    | 1161188 base downstream | q21.2  | CG | 0.8342 | 0.786 | 0.0006245 |
| 6  | rs2503674  | 48336297  | LOC442213 | 191913 base downstream  | p12.3  | CT | 0.8925 | 0.746 | 0.0006245 |
| 8  | rs12335174 | 120041852 | TNFRSF11B | 8288 base downstream    | q24.12 | GT | 0.9462 | 0.688 | 0.0006257 |
| 10 | rs17574901 | 115729399 | ADRB1     | 64396 base upstream     | q25.3  | CT | 0.9407 | 0.686 | 0.000626  |
| 17 | rs6501572  | 68395857  | SLC39A11  | intron 5                | q24.3  | GT | 0.3946 | 1.2   | 0.000626  |
| 5  | rs17416034 | 104064571 | NUDT12    | 1138182 base downstream | q21.2  | CT | 0.8346 | 0.787 | 0.0006264 |
| 5  | rs188027   | 64077497  | P18SRP    | intron 3                | q12.3  | CT | 0.4652 | 1.195 | 0.0006265 |
| 5  | rs325565   | 104087924 | NUDT12    | 1161535 base downstream | q21.2  | GT | 0.1658 | 1.272 | 0.0006267 |
| 1  | rs591545   | 98737106  | SNX7      | 162694 base upstream    | p21.3  | CT | 0.072  | 0.686 | 0.0006267 |

|    |            |           |           |                         |        |    |        |       |           |
|----|------------|-----------|-----------|-------------------------|--------|----|--------|-------|-----------|
| 10 | rs17653278 | 115728492 | ADRB1     | 65303 base upstream     | q25.3  | CG | 0.9399 | 0.684 | 0.0006268 |
| 4  | rs2090900  | 58906337  | IGFBP7    | 1235041 base downstream | q12    | AC | 0.2775 | 0.815 | 0.0006271 |
| 2  | rs17864534 | 51617864  | NRXN1     | 504686 base downstream  | p16.3  | CT | 0.4397 | 1.209 | 0.0006271 |
| 17 | rs8069336  | 68396477  | SLC39A11  | intron 5                | q24.3  | AG | 0.3946 | 1.201 | 0.0006272 |
| 8  | rs4876873  | 120039201 | TNFRSF11B | 5637 base downstream    | q24.12 | AC | 0.0538 | 1.453 | 0.000628  |
| 16 | rs3924627  | 8571128   | C16orf68  | 51899 base upstream     | p13.2  | AG | 0.6257 | 0.831 | 0.0006283 |
| 2  | rs1419948  | 229868406 | PID1      | 24105 base downstream   | q36.3  | AC | 0.9285 | 0.712 | 0.0006286 |
| 6  | rs2535672  | 94846661  | EPHA7     | 660668 base downstream  | q16.1  | AG | 0.5844 | 0.835 | 0.0006287 |
| 7  | rs473816   | 125570670 | GRM8      | 295222 base upstream    | q31.33 | AG | 0.1216 | 0.758 | 0.0006289 |
| 8  | rs10109779 | 14884317  | SGCZ      | intron 7                | p22    | AG | 0.5812 | 0.821 | 0.0006298 |
| 3  | rs1505595  | 63505317  | SYNPR     | intron 2                | p14.2  | CT | 0.7981 | 1.271 | 0.0006302 |
| 5  | rs12518236 | 104120449 | NUDT12    | 1194060 base downstream | q21.2  | AG | 0.1285 | 1.318 | 0.0006308 |
| 8  | rs4876872  | 120038338 | TNFRSF11B | 4774 base downstream    | q24.12 | AG | 0.9461 | 0.688 | 0.000631  |
| 20 | rs2426130  | 47147339  | CSE1L     | 448 base downstream     | q13.13 | CT | 0.0773 | 1.404 | 0.000631  |
| 14 | rs8013167  | 32679948  | NPAS3     | intron 1                | q13.1  | AG | 0.2801 | 1.219 | 0.0006324 |
| 2  | rs1419947  | 229868477 | PID1      | 24176 base downstream   | q36.3  | AG | 0.9286 | 0.712 | 0.0006368 |
| 8  | rs12386956 | 120037209 | TNFRSF11B | 3645 base downstream    | q24.12 | AG | 0.0539 | 1.452 | 0.0006379 |
| 5  | rs325567   | 104088490 | NUDT12    | 1162101 base downstream | q21.2  | CT | 0.8341 | 0.786 | 0.0006381 |
| 8  | rs17758011 | 120042745 | TNFRSF11B | 9181 base downstream    | q24.12 | GT | 0.0538 | 1.452 | 0.0006387 |
| 12 | rs12824729 | 94627360  | NTN4      | intron 5                | q22    | AG | 0.2308 | 1.236 | 0.0006389 |
| 21 | rs2837176  | 40054216  | LOC150084 | intron 2                | q22.2  | CG | 0.3635 | 1.215 | 0.00064   |
| 10 | rs17653713 | 115736409 | ADRB1     | 57386 base upstream     | q25.3  | CT | 0.9429 | 0.691 | 0.0006401 |
| 5  | rs17097481 | 141067873 | CENTD3    | 25889 base downstream   | q31.3  | CT | 0.125  | 1.322 | 0.0006401 |
| 10 | rs11593900 | 110740500 | XPNPEP1   | 874013 base upstream    | q25.1  | CT | 0.181  | 0.791 | 0.0006401 |
| 12 | rs11108202 | 94624381  | NTN4      | intron 5                | q22    | AG | 0.2308 | 1.237 | 0.0006403 |
| 7  | rs618766   | 125569040 | GRM8      | 296852 base upstream    | q31.33 | GT | 0.1215 | 0.758 | 0.0006405 |
| 2  | rs4849121  | 111316177 | ACOXL     | intron 10               | q13    | AG | 0.4705 | 0.837 | 0.0006408 |
| 3  | rs1027764  | 63504654  | SYNPR     | intron 2                | p14.2  | GT | 0.2019 | 0.788 | 0.0006416 |
| 8  | rs3134073  | 120035902 | TNFRSF11B | 2338 base downstream    | q24.12 | AG | 0.9461 | 0.689 | 0.0006417 |
| 5  | rs325569   | 104089373 | NUDT12    | 1162984 base downstream | q21.2  | AT | 0.8341 | 0.786 | 0.0006422 |
| 7  | rs492757   | 125567593 | GRM8      | 298299 base upstream    | q31.33 | AT | 0.8785 | 1.319 | 0.0006428 |
| 2  | rs4849143  | 113503827 | IL1F8     | intron 3                | q13    | CG | 0.6875 | 0.824 | 0.0006441 |
| 10 | rs10508745 | 30470812  | KIAA1462  | 94006 base downstream   | p11.23 | CT | 0.2475 | 1.226 | 0.0006442 |
| 10 | rs7896890  | 30470483  | KIAA1462  | 93677 base downstream   | p11.23 | CT | 0.7525 | 0.816 | 0.0006452 |
| 2  | rs3795980  | 38204318  | CYP1B1    | 47522 base downstream   | p22.2  | GT | 0.8762 | 0.767 | 0.0006453 |
| 7  | rs653569   | 125565214 | GRM8      | 300678 base upstream    | q31.33 | AG | 0.1215 | 0.758 | 0.0006463 |
| 21 | rs9983659  | 40054047  | LOC150084 | intron 2                | q22.2  | CT | 0.3635 | 1.215 | 0.0006464 |

|    |            |           |           |                         |        |    |        |       |           |
|----|------------|-----------|-----------|-------------------------|--------|----|--------|-------|-----------|
| 11 | rs2418583  | 32207093  | RCN1      | 123440 base downstream  | p13    | CT | 0.6749 | 1.213 | 0.0006466 |
| 6  | rs658208   | 94849976  | EPHA7     | 663983 base downstream  | q16.1  | AG | 0.4153 | 1.197 | 0.0006467 |
| 11 | rs374729   | 115297985 | CADM1     | 417534 base downstream  | q23.2  | AG | 0.2878 | 1.221 | 0.0006471 |
| 5  | rs12520736 | 104090901 | NUDT12    | 1164512 base downstream | q21.2  | CT | 0.166  | 1.272 | 0.0006476 |
| 6  | rs2787950  | 94859869  | EPHA7     | 673876 base downstream  | q16.1  | AC | 0.5601 | 0.831 | 0.0006483 |
| 10 | rs11007912 | 30461295  | KIAA1462  | 84489 base downstream   | p11.23 | CG | 0.2477 | 1.227 | 0.0006488 |
| 10 | rs11007913 | 30463891  | KIAA1462  | 87085 base downstream   | p11.23 | AG | 0.2477 | 1.227 | 0.0006489 |
| 8  | rs4585701  | 82125199  | PAG1      | intron 7                | q21.13 | CT | 0.9431 | 1.474 | 0.0006491 |
| 4  | rs4132377  | 166318168 | KLHL2     | 30072 base upstream     | q32.3  | CG | 0.9418 | 0.687 | 0.0006492 |
| 4  | rs12648092 | 58905977  | IGFBP7    | 1234681 base downstream | q12    | AG | 0.2781 | 0.816 | 0.0006497 |
| 7  | rs648172   | 125571034 | GRM8      | 294858 base upstream    | q31.33 | AT | 0.1217 | 0.759 | 0.0006497 |
| 8  | rs3134072  | 120034718 | TNFRSF11B | 1154 base downstream    | q24.12 | CT | 0.9461 | 0.689 | 0.0006499 |
| 10 | rs11194258 | 110501214 | XPNPEP1   | 1113299 base upstream   | q25.1  | AG | 0.8175 | 1.269 | 0.0006502 |
| 5  | rs161456   | 104090924 | NUDT12    | 1164535 base downstream | q21.2  | CT | 0.834  | 0.786 | 0.0006505 |
| 10 | rs11007851 | 30332603  | KIAA1462  | 10786 base upstream     | p11.23 | CT | 0.5537 | 0.831 | 0.0006506 |
| 10 | rs11599609 | 110714483 | XPNPEP1   | 900030 base upstream    | q25.1  | CT | 0.8192 | 1.264 | 0.0006508 |
| 4  | rs12648067 | 58905886  | IGFBP7    | 1234590 base downstream | q12    | AG | 0.2781 | 0.817 | 0.0006517 |
| 5  | rs11950581 | 40304970  | PTGER4    | 410818 base upstream    | p13.1  | AG | 0.6639 | 0.825 | 0.0006519 |
| 10 | rs11593939 | 110740736 | XPNPEP1   | 873777 base upstream    | q25.1  | CT | 0.1812 | 0.791 | 0.0006519 |
| 5  | rs161782   | 104091358 | NUDT12    | 1164969 base downstream | q21.2  | AG | 0.166  | 1.272 | 0.000652  |
| 21 | rs2837175  | 40053815  | LOC150084 | intron 2                | q22.2  | CT | 0.3636 | 1.215 | 0.0006521 |
| 5  | rs161457   | 104090937 | NUDT12    | 1164548 base downstream | q21.2  | CT | 0.166  | 1.272 | 0.0006522 |
| 6  | rs2523407  | 29829284  | HLA-F     | 27002 base downstream   | p22.1  | CG | 0.8284 | 0.786 | 0.0006523 |
| 6  | rs546100   | 94860527  | EPHA7     | 674534 base downstream  | q16.1  | AC | 0.4316 | 1.201 | 0.0006525 |
| 3  | rs11130944 | 63503954  | SYNPR     | intron 2                | p14.2  | CT | 0.202  | 0.79  | 0.0006528 |
| 3  | rs1268623  | 124794918 | PTPLB     | 8304 base downstream    | q21.1  | GT | 0.1993 | 1.261 | 0.0006536 |
| 6  | rs606061   | 94852999  | EPHA7     | 667006 base downstream  | q16.1  | AG | 0.4153 | 1.197 | 0.0006539 |
| 21 | rs4816652  | 40052396  | LOC150084 | intron 2                | q22.2  | CT | 0.6468 | 0.821 | 0.0006541 |
| 6  | rs591551   | 94854912  | EPHA7     | 668919 base downstream  | q16.1  | CT | 0.4153 | 1.197 | 0.0006543 |
| 6  | rs694170   | 94854362  | EPHA7     | 668369 base downstream  | q16.1  | AG | 0.4153 | 1.197 | 0.0006545 |
| 2  | rs6733018  | 232133520 | NMUR1     | 30073 base downstream   | q37.1  | AG | 0.0815 | 1.38  | 0.0006547 |
| 8  | rs3102725  | 120020186 | TNFRSF11B | intron 4                | q24.12 | AG | 0.054  | 1.45  | 0.0006547 |
| 10 | rs12256452 | 110503291 | XPNPEP1   | 1111222 base upstream   | q25.1  | CG | 0.8175 | 1.268 | 0.0006547 |
| 2  | rs11886047 | 43704094  | PLEKHH2   | 13856 base upstream     | p21    | CT | 0.2492 | 0.796 | 0.0006548 |
| 2  | rs1528813  | 51646400  | NRXN1     | 533222 base downstream  | p16.3  | AT | 0.548  | 0.836 | 0.0006553 |
| 19 | rs1864132  | 38737515  | PEPD      | 32874 base downstream   | q13.11 | AG | 0.1179 | 0.757 | 0.0006553 |
| 8  | rs11990927 | 135092082 | ST3GAL1   | 438738 base downstream  | q24.22 | AG | 0.5715 | 1.196 | 0.0006556 |

|    |            |           |           |                         |        |    |        |       |           |
|----|------------|-----------|-----------|-------------------------|--------|----|--------|-------|-----------|
| 6  | rs16877105 | 15948412  | DTNBP1    | 177162 base downstream  | p22.3  | AG | 0.131  | 1.3   | 0.0006556 |
| 8  | rs3134070  | 120034205 | TNFRSF11B | 641 base downstream     | q24.12 | CT | 0.9461 | 0.689 | 0.0006557 |
| 8  | rs2127938  | 82122134  | PAG1      | intron 7                | q21.13 | CT | 0.0569 | 0.677 | 0.000656  |
| 6  | rs3873283  | 30040979  | HCG9      | 9891 base upstream      | p21.33 | AG | 0.8635 | 1.311 | 0.0006562 |
| 7  | rs654111   | 125571959 | GRM8      | 293933 base upstream    | q31.33 | CT | 0.1217 | 0.759 | 0.0006564 |
| 8  | rs3134069  | 120034169 | TNFRSF11B | 605 base downstream     | q24.12 | AC | 0.9461 | 0.689 | 0.0006565 |
| 5  | rs161783   | 104091863 | NUDT12    | 1165474 base downstream | q21.2  | CT | 0.834  | 0.786 | 0.0006566 |
| 6  | rs9363138  | 94814379  | EPHA7     | 628386 base downstream  | q16.1  | GT | 0.4232 | 1.196 | 0.0006568 |
| 10 | rs10509877 | 110503533 | XPNPEP1   | 1110980 base upstream   | q25.1  | AG | 0.8175 | 1.268 | 0.0006568 |
| 11 | rs12285496 | 2794317   | KCNQ1     | intron 15               | p15.5  | CG | 0.2015 | 1.254 | 0.0006569 |
| 7  | rs651763   | 125565195 | GRM8      | 300697 base upstream    | q31.33 | AC | 0.1215 | 0.758 | 0.0006573 |
| 6  | rs16877108 | 15948658  | DTNBP1    | 177408 base downstream  | p22.3  | AG | 0.869  | 0.769 | 0.0006576 |
| 8  | rs11998159 | 135092098 | ST3GAL1   | 438754 base downstream  | q24.22 | AG | 0.4285 | 0.836 | 0.0006583 |
| 16 | rs2908915  | 47674551  | CBLN1     | 195650 base upstream    | q12.1  | CT | 0.4622 | 0.834 | 0.0006585 |
| 7  | rs674616   | 125572333 | GRM8      | 293559 base upstream    | q31.33 | CT | 0.1217 | 0.759 | 0.0006585 |
| 5  | rs161785   | 104092841 | NUDT12    | 1166452 base downstream | q21.2  | AC | 0.834  | 0.786 | 0.0006591 |
| 6  | rs546226   | 94860568  | EPHA7     | 674575 base downstream  | q16.1  | AG | 0.5683 | 0.833 | 0.0006608 |
| 5  | rs416286   | 73297869  | RGNEF     | 54585 base downstream   | q13.2  | AG | 0.7228 | 1.219 | 0.0006609 |
| 15 | rs1159895  | 84618315  | FLJ32310  | intron 14               | q25.3  | AG | 0.3296 | 1.215 | 0.000661  |
| 11 | rs2200174  | 18877606  | MRGPRX1   | 34329 base upstream     | p15.1  | AG | 0.1071 | 1.339 | 0.0006611 |
| 10 | rs4751138  | 131545202 | EBF3      | intron 6                | q26.3  | CT | 0.7292 | 1.232 | 0.0006619 |
| 6  | rs9320803  | 121666786 | C6orf170  | intron 24               | q22.31 | CT | 0.8241 | 0.795 | 0.0006621 |
| 5  | rs161786   | 104093239 | NUDT12    | 1166850 base downstream | q21.2  | CT | 0.1661 | 1.272 | 0.0006622 |
| 6  | rs16877113 | 15948891  | DTNBP1    | 177641 base downstream  | p22.3  | AC | 0.131  | 1.3   | 0.0006626 |
| 6  | rs9260734  | 30040645  | HCG9      | 10225 base upstream     | p21.33 | AG | 0.1366 | 0.763 | 0.0006636 |
| 4  | rs984924   | 82339936  | PRKG2     | intron 17               | q21.21 | AG | 0.9374 | 0.679 | 0.000664  |
| 5  | rs161787   | 104093326 | NUDT12    | 1166937 base downstream | q21.2  | CT | 0.8339 | 0.786 | 0.0006656 |
| 2  | rs7568264  | 46182056  | PRKCE     | intron 11               | p21    | AG | 0.2371 | 0.801 | 0.0006657 |
| 8  | rs3102734  | 120033197 | TNFRSF11B | intron 4                | q24.12 | AG | 0.0539 | 1.45  | 0.0006662 |
| 9  | rs11138705 | 82311365  | TLE4      | 779888 base downstream  | q21.31 | CG | 0.7633 | 0.801 | 0.0006665 |
| 4  | rs11725852 | 109416443 | LEF1      | 107416 base downstream  | q25    | CT | 0.7318 | 1.23  | 0.000667  |
| 4  | rs12641535 | 58905741  | IGFBP7    | 1234445 base downstream | q12    | CT | 0.7216 | 1.223 | 0.000667  |
| 5  | rs161788   | 104095776 | NUDT12    | 1169387 base downstream | q21.2  | CT | 0.1661 | 1.272 | 0.0006674 |
| 8  | rs1052873  | 27723712  | PBK       | EXON 1                  | p21.1  | CT | 0.7969 | 1.26  | 0.0006677 |
| 11 | rs2418582  | 32207041  | RCN1      | 123388 base downstream  | p13    | AG | 0.675  | 1.214 | 0.0006678 |
| 7  | rs920802   | 121757354 | CADPS2    | intron 2                | q31.32 | AG | 0.4113 | 0.827 | 0.0006687 |
| 8  | rs3134068  | 120031840 | TNFRSF11B | intron 4                | q24.12 | CT | 0.0539 | 1.45  | 0.0006695 |

|    |            |           |           |                         |        |    |        |       |           |
|----|------------|-----------|-----------|-------------------------|--------|----|--------|-------|-----------|
| 8  | rs11986666 | 82124010  | PAG1      | intron 7                | q21.13 | AC | 0.9429 | 1.468 | 0.0006709 |
| 20 | rs2426133  | 47156669  | STAU1     | 6615 base upstream      | q13.13 | CT | 0.0606 | 1.477 | 0.0006718 |
| 1  | rs6668777  | 55456395  | USP24     | 3045 base downstream    | p32.3  | AC | 0.7566 | 0.811 | 0.0006719 |
| 10 | rs11593385 | 110709762 | XPNPEP1   | 904751 base upstream    | q25.1  | CT | 0.181  | 0.791 | 0.0006722 |
| 2  | rs918804   | 38226868  | CYP1B1    | 70072 base downstream   | p22.2  | AT | 0.8595 | 0.778 | 0.0006724 |
| 8  | rs16918909 | 54312587  | OPRK1     | intron 2                | q11.23 | AG | 0.9018 | 1.366 | 0.0006732 |
| 7  | rs642710   | 125565143 | GRM8      | 300749 base upstream    | q31.33 | CT | 0.8786 | 1.319 | 0.0006753 |
| 8  | rs3102733  | 120031301 | TNFRSF11B | intron 4                | q24.12 | CT | 0.0539 | 1.449 | 0.0006757 |
| 21 | rs4816653  | 40052413  | LOC150084 | intron 2                | q22.2  | CT | 0.6362 | 0.823 | 0.0006761 |
| 6  | rs471348   | 94855506  | EPHA7     | 669513 base downstream  | q16.1  | AG | 0.5845 | 0.835 | 0.0006763 |
| 10 | rs7915293  | 30434183  | KIAA1462  | 57377 base downstream   | p11.23 | AG | 0.6743 | 0.828 | 0.0006769 |
| 10 | rs17779016 | 110714051 | XPNPEP1   | 900462 base upstream    | q25.1  | AG | 0.8191 | 1.263 | 0.0006772 |
| 8  | rs3134067  | 120030619 | TNFRSF11B | intron 4                | q24.12 | CT | 0.9461 | 0.69  | 0.0006777 |
| 6  | rs1927587  | 15953087  | DTNBP1    | 181837 base downstream  | p22.3  | CT | 0.8689 | 0.77  | 0.0006779 |
| 2  | rs12712969 | 46185673  | PRKCE     | intron 11               | p21    | CT | 0.2441 | 0.803 | 0.000678  |
| 16 | rs2967260  | 47660593  | CBLN1     | 209608 base upstream    | q12.1  | AT | 0.5376 | 1.203 | 0.0006782 |
| 5  | rs7723455  | 164229034 | MAT2B     | 1350131 base downstream | q34    | AC | 0.2757 | 0.811 | 0.0006788 |
| 3  | rs9850250  | 45188375  | CDCP1     | 25457 base downstream   | p21.31 | AT | 0.571  | 0.834 | 0.0006791 |
| 3  | rs7651813  | 172708739 | TNIK      | 48193 base downstream   | q26.31 | AG | 0.758  | 1.239 | 0.0006792 |
| 3  | rs1994727  | 22206935  | ZNF659    | 439115 base downstream  | p24.3  | AT | 0.8227 | 0.797 | 0.0006793 |
| 6  | rs1352380  | 94782808  | EPHA7     | 596815 base downstream  | q16.1  | CT | 0.438  | 1.194 | 0.0006798 |
| 5  | rs17348299 | 55358652  | IL6ST     | 32132 base downstream   | q11.2  | AC | 0.1751 | 1.285 | 0.00068   |
| 8  | rs3134066  | 120029532 | TNFRSF11B | intron 4                | q24.12 | AT | 0.9461 | 0.69  | 0.0006805 |
| 10 | rs4933978  | 85961327  | PCDH21    | intron 13               | q23.1  | AG | 0.2526 | 0.816 | 0.0006823 |
| 4  | rs12647365 | 58905626  | IGFBP7    | 1234330 base downstream | q12    | AG | 0.2788 | 0.818 | 0.0006827 |
| 21 | rs2410182  | 40101946  | LOC150084 | 6053 base downstream    | q22.2  | AG | 0.4164 | 0.836 | 0.0006842 |
| 8  | rs3102731  | 120028570 | TNFRSF11B | intron 4                | q24.12 | AG | 0.0539 | 1.448 | 0.0006852 |
| 8  | rs3134062  | 120028459 | TNFRSF11B | intron 4                | q24.12 | AG | 0.9461 | 0.691 | 0.0006861 |
| 6  | rs9398632  | 121702869 | C6orf170  | 5526 base downstream    | q22.31 | AC | 0.8237 | 0.796 | 0.0006861 |
| 6  | rs9320809  | 121698543 | C6orf170  | 1200 base downstream    | q22.31 | AG | 0.8237 | 0.796 | 0.0006862 |
| 2  | rs1406429  | 51647831  | NRXN1     | 534653 base downstream  | p16.3  | CT | 0.5486 | 0.836 | 0.0006865 |
| 2  | rs1116246  | 46183371  | PRKCE     | intron 11               | p21    | AG | 0.7561 | 1.245 | 0.0006866 |
| 7  | rs585146   | 125574072 | GRM8      | 291820 base upstream    | q31.33 | CT | 0.8781 | 1.316 | 0.0006867 |
| 8  | rs3102726  | 120024531 | TNFRSF11B | intron 4                | q24.12 | AT | 0.9461 | 0.691 | 0.0006871 |
| 13 | rs283982   | 75986324  | KCTD12    | 365980 base upstream    | q22.2  | CT | 0.2097 | 1.252 | 0.0006879 |
| 2  | rs4851164  | 98846759  | MGC42367  | intron 9                | q11.2  | CT | 0.9447 | 0.678 | 0.0006889 |
| 8  | rs3134059  | 120025033 | TNFRSF11B | intron 4                | q24.12 | CT | 0.0539 | 1.448 | 0.0006893 |

|    |            |           |           |                         |        |    |        |       |           |
|----|------------|-----------|-----------|-------------------------|--------|----|--------|-------|-----------|
| 8  | rs3102729  | 120025686 | TNFRSF11B | intron 4                | q24.12 | AG | 0.0539 | 1.448 | 0.00069   |
| 8  | rs3134060  | 120025224 | TNFRSF11B | intron 4                | q24.12 | AG | 0.9461 | 0.691 | 0.0006909 |
| 8  | rs3134061  | 120025500 | TNFRSF11B | intron 4                | q24.12 | AT | 0.0539 | 1.448 | 0.000692  |
| 21 | rs238962   | 16554814  | C21orf34  | intron 4                | q21.1  | CT | 0.6212 | 0.828 | 0.0006942 |
| 6  | rs6557347  | 154740453 | PIP3-E    | 20861 base downstream   | q25.2  | CT | 0.0542 | 0.666 | 0.0006942 |
| 6  | rs7772909  | 6092904   | F13A1     | intron 1                | p25.1  | CT | 0.1689 | 1.265 | 0.0006947 |
| 2  | rs10167555 | 46174610  | PRKCE     | intron 11               | p21    | GT | 0.8058 | 1.253 | 0.0006954 |
| 2  | rs17022034 | 98853280  | MGC42367  | intron 9                | q11.2  | AT | 0.9448 | 0.677 | 0.0006954 |
| 2  | rs9678578  | 113527418 | IL1F8     | 507 base downstream     | q13    | AT | 0.6865 | 0.825 | 0.0006957 |
| 6  | rs7748218  | 6092368   | F13A1     | intron 1                | p25.1  | CT | 0.8311 | 0.791 | 0.0006962 |
| 4  | rs17218140 | 58904343  | IGFBP7    | 1233047 base downstream | q12    | GT | 0.7209 | 1.221 | 0.0006963 |
| 10 | rs560559   | 30537356  | PAPD1     | 104408 base upstream    | p11.23 | AG | 0.2701 | 1.225 | 0.0006974 |
| 7  | rs6973468  | 9678156   | NXPH1     | 919039 base downstream  | p21.3  | GT | 0.813  | 1.276 | 0.0006974 |
| 5  | rs436777   | 73300336  | RGNEF     | 57052 base downstream   | q13.3  | AG | 0.7226 | 1.219 | 0.0006983 |
| 2  | rs1797392  | 232130501 | NMUR1     | 27054 base downstream   | q37.1  | CT | 0.9195 | 0.724 | 0.0006983 |
| 3  | rs11926493 | 63498351  | SYNPR     | intron 2                | p14.2  | CT | 0.8075 | 1.264 | 0.0006986 |
| 15 | rs7181898  | 51234395  | WDR72     | 358834 base upstream    | q21.3  | AG | 0.2406 | 1.232 | 0.0006989 |
| 6  | rs9388559  | 127643410 | RNF146    | intron 2                | q22.33 | AG | 0.0364 | 1.533 | 0.0006989 |
| 6  | rs7764180  | 127647360 | RNF146    | intron 3                | q22.33 | AC | 0.9636 | 0.653 | 0.0006989 |
| 6  | rs9401947  | 127643754 | RNF146    | intron 2                | q22.33 | CT | 0.9636 | 0.653 | 0.0006989 |
| 6  | rs9321072  | 127648042 | RNF146    | intron 3                | q22.33 | CT | 0.9636 | 0.653 | 0.0006989 |
| 6  | rs9401948  | 127666637 | ECHDC1    | intron 1                | q22.33 | CT | 0.9636 | 0.653 | 0.0006992 |
| 6  | rs6936084  | 127655994 | ECHDC1    | intron 1                | q22.33 | AG | 0.0364 | 1.532 | 0.0006992 |
| 6  | rs9372862  | 127642939 | RNF146    | intron 1                | q22.33 | CT | 0.0364 | 1.532 | 0.0006992 |
| 6  | rs761842   | 127662563 | ECHDC1    | intron 1                | q22.33 | AT | 0.9636 | 0.653 | 0.0006992 |
| 6  | rs9372863  | 127659891 | ECHDC1    | intron 1                | q22.33 | AG | 0.9636 | 0.653 | 0.0006992 |
| 6  | rs9401949  | 127692809 | ECHDC1    | intron 4                | q22.33 | CT | 0.0364 | 1.532 | 0.0006994 |
| 6  | rs9372865  | 127691077 | ECHDC1    | intron 4                | q22.33 | CT | 0.9636 | 0.653 | 0.0006995 |
| 6  | rs4141423  | 127690339 | ECHDC1    | intron 4                | q22.33 | CT | 0.9636 | 0.653 | 0.0006995 |
| 6  | rs9375500  | 127688899 | ECHDC1    | intron 3                | q22.33 | CT | 0.0364 | 1.532 | 0.0006995 |
| 6  | rs9372861  | 127642888 | RNF146    | intron 1                | q22.33 | CT | 0.9636 | 0.653 | 0.0006997 |
| 21 | rs2837223  | 40085103  | LOC150084 | intron 6                | q22.2  | CT | 0.3166 | 1.207 | 0.0006999 |
| 15 | rs8041239  | 86276360  | NTRK3     | intron 4                | q25.3  | AG | 0.7974 | 1.264 | 0.0007    |
| 7  | rs498875   | 125577694 | GRM8      | 288198 base upstream    | q31.33 | CT | 0.122  | 0.76  | 0.0007007 |
| 6  | rs9372866  | 127697120 | ECHDC1    | intron 4                | q22.33 | CT | 0.0364 | 1.533 | 0.000701  |
| 4  | rs11727794 | 58903846  | IGFBP7    | 1232550 base downstream | q12    | AC | 0.2792 | 0.819 | 0.0007011 |
| 20 | rs6012644  | 47381910  | KCNB1     | 40001 base upstream     | q13.13 | CG | 0.0661 | 1.471 | 0.0007014 |

|    |            |           |           |                         |        |    |        |       |           |
|----|------------|-----------|-----------|-------------------------|--------|----|--------|-------|-----------|
| 2  | rs4851166  | 98860167  | MGC42367  | intron 9                | q11.2  | CT | 0.9448 | 0.677 | 0.0007017 |
| 4  | rs178329   | 189573141 | FLJ36180  | 267498 base downstream  | q35.2  | AG | 0.1954 | 1.27  | 0.0007018 |
| 21 | rs11701338 | 40083878  | LOC150084 | intron 6                | q22.2  | CT | 0.6834 | 0.828 | 0.0007022 |
| 11 | rs633683   | 118009952 | PHLDB1    | intron 10               | q23.3  | CT | 0.599  | 0.827 | 0.0007025 |
| 21 | rs760285   | 40083524  | LOC150084 | intron 6                | q22.2  | AG | 0.6834 | 0.828 | 0.0007031 |
| 16 | rs17664315 | 6607296   | A2BP1     | intron 2                | p13.2  | GT | 0.4919 | 1.199 | 0.0007032 |
| 6  | rs9277053  | 33114200  | HLA-DPA1  | 26571 base upstream     | p21.32 | AG | 0.292  | 0.811 | 0.0007033 |
| 6  | rs9375502  | 127698485 | ECHDC1    | intron 4                | q22.33 | GT | 0.9637 | 0.652 | 0.000704  |
| 1  | rs10900601 | 202838673 | LRRN5     | 14254 base upstream     | q32.1  | AG | 0.2976 | 1.217 | 0.0007043 |
| 5  | rs2962851  | 164230392 | MAT2B     | 1351489 base downstream | q34    | AG | 0.2776 | 0.811 | 0.0007059 |
| 4  | rs11735710 | 58903429  | IGFBP7    | 1232133 base downstream | q12    | AG | 0.2794 | 0.819 | 0.0007062 |
| 3  | rs6763775  | 129059205 | MGLL      | 34464 base downstream   | q21.3  | CG | 0.8434 | 0.771 | 0.0007094 |
| 1  | rs7526907  | 110912891 | KCNA2     | 34407 base upstream     | p13.3  | AG | 0.7401 | 0.818 | 0.0007099 |
| 6  | rs7748589  | 14489463  | CD83      | 244338 base downstream  | p23    | AG | 0.5263 | 0.835 | 0.0007099 |
| 5  | rs2962852  | 164230439 | MAT2B     | 1351536 base downstream | q34    | AG | 0.2776 | 0.811 | 0.0007101 |
| 1  | rs12092511 | 51249676  | CDKN2C    | 36781 base downstream   | p33    | AG | 0.4286 | 0.836 | 0.0007106 |
| 20 | rs6107609  | 5210119   | PROKR2    | 20567 base upstream     | p12.3  | CT | 0.5045 | 0.838 | 0.0007109 |
| 6  | rs749212   | 124525535 | TCBA1     | intron 1                | q22.31 | AG | 0.8762 | 1.308 | 0.000711  |
| 2  | rs13411546 | 128338961 | MGC4268   | EXON 1                  | q14.3  | AG | 0.4089 | 1.202 | 0.0007114 |
| 2  | rs1226973  | 229871291 | PID1      | 26990 base downstream   | q36.3  | AC | 0.9288 | 0.715 | 0.0007123 |
| 2  | rs17022036 | 98863360  | MGC42367  | intron 9                | q11.2  | GT | 0.9448 | 0.676 | 0.0007124 |
| 20 | rs4580454  | 5210168   | PROKR2    | 20518 base upstream     | p12.3  | CG | 0.5046 | 0.838 | 0.000713  |
| 20 | rs2326618  | 5211444   | PROKR2    | 19242 base upstream     | p12.3  | AG | 0.4953 | 1.193 | 0.0007137 |
| 8  | rs2511586  | 105323016 | RIMS2     | intron 19               | q22.3  | AG | 0.6871 | 0.826 | 0.0007139 |
| 16 | rs2967255  | 47669016  | CBLN1     | 201185 base upstream    | q12.1  | AC | 0.4624 | 0.833 | 0.0007143 |
| 7  | rs635680   | 125578124 | GRM8      | 287768 base upstream    | q31.33 | CG | 0.122  | 0.761 | 0.0007153 |
| 1  | rs2166307  | 66825324  | SGIP1     | intron 1                | p31.3  | CT | 0.1269 | 1.324 | 0.0007155 |
| 10 | rs10887255 | 85962578  | PCDH21    | intron 15               | q23.1  | CT | 0.2528 | 0.816 | 0.0007163 |
| 5  | rs161790   | 104100998 | NUDT12    | 1174609 base downstream | q21.2  | CT | 0.8335 | 0.787 | 0.0007164 |
| 5  | rs11133949 | 2515225   | IRX2      | 284654 base upstream    | p15.33 | AG | 0.6062 | 1.199 | 0.000717  |
| 5  | rs161791   | 104101159 | NUDT12    | 1174770 base downstream | q21.2  | GT | 0.1665 | 1.271 | 0.0007178 |
| 3  | rs515920   | 54693761  | CACNA2D3  | intron 11               | p14.3  | CT | 0.5122 | 0.833 | 0.0007178 |
| 12 | rs6490059  | 115293528 | THRAP2    | 94002 base downstream   | q24.21 | CT | 0.0579 | 1.448 | 0.000718  |
| 2  | rs10182566 | 29141212  | FLJ34931  | EXON 1                  | p23.2  | CT | 0.7435 | 0.808 | 0.0007183 |
| 8  | rs2100119  | 3343653   | CSMD1     | intron 60               | p23.2  | AG | 0.7871 | 1.247 | 0.0007184 |
| 2  | rs10188379 | 38224980  | CYP1B1    | 68184 base downstream   | p22.2  | CG | 0.2064 | 1.241 | 0.0007191 |
| 20 | rs910970   | 5219710   | PROKR2    | 10976 base upstream     | p12.3  | CT | 0.4952 | 1.193 | 0.00072   |



|    |            |           |          |                         |        |    |        |       |           |
|----|------------|-----------|----------|-------------------------|--------|----|--------|-------|-----------|
| 4  | rs2174394  | 136738151 | PABPC4L  | 1395798 base downstream | q28.3  | AG | 0.1339 | 1.321 | 0.0007205 |
| 12 | rs7313246  | 9920781   | CLEC2B   | 7056 base downstream    | p13.31 | AT | 0.7161 | 0.82  | 0.0007207 |
| 6  | rs9388558  | 127638279 | RNF146   | intron 1                | q22.33 | AT | 0.9636 | 0.653 | 0.0007207 |
| 4  | rs2102279  | 136739022 | PABPC4L  | 1396669 base downstream | q28.3  | CT | 0.1339 | 1.321 | 0.0007212 |
| 6  | rs1050783  | 6090691   | F13A1    | EXON 1                  | p25.1  | CT | 0.8311 | 0.791 | 0.0007226 |
| 2  | rs1574516  | 98867750  | MGC42367 | intron 9                | q11.2  | CT | 0.9449 | 0.675 | 0.0007228 |
| 4  | rs3913354  | 109399892 | LEF1     | 90865 base downstream   | q25    | AT | 0.7318 | 1.227 | 0.0007231 |
| 2  | rs12477409 | 46181464  | PRKCE    | intron 11               | p21    | CG | 0.7566 | 1.245 | 0.0007231 |
| 20 | rs6038126  | 5221314   | PROKR2   | 9372 base upstream      | p12.3  | CT | 0.495  | 1.193 | 0.0007233 |
| 6  | rs682644   | 94856518  | EPHA7    | 670525 base downstream  | q16.1  | CT | 0.416  | 1.198 | 0.0007239 |
| 1  | rs884108   | 202857860 | LRRN5    | intron 1                | q32.1  | AG | 0.2375 | 1.24  | 0.000724  |
| 2  | rs2345955  | 46174384  | PRKCE    | intron 11               | p21    | CT | 0.2002 | 0.8   | 0.0007266 |
| 16 | rs2967254  | 47669641  | CBLN1    | 200560 base upstream    | q12.1  | CT | 0.5376 | 1.199 | 0.0007278 |
| 3  | rs2366434  | 59332476  | FLJ42117 | 321721 base downstream  | p14.2  | AG | 0.3843 | 1.2   | 0.0007283 |
| 6  | rs2787948  | 94856881  | EPHA7    | 670888 base downstream  | q16.1  | CT | 0.4161 | 1.198 | 0.0007291 |
| 12 | rs1376795  | 128846223 | TMEM132D | intron 8                | q24.33 | CT | 0.294  | 1.212 | 0.0007297 |
| 2  | rs12477342 | 46181374  | PRKCE    | intron 11               | p21    | CT | 0.2433 | 0.804 | 0.0007302 |
| 2  | rs990524   | 113532952 | IL1F5    | intron 1                | q13    | CT | 0.3136 | 1.211 | 0.0007303 |
| 6  | rs3024457  | 6097407   | F13A1    | intron 2                | p25.1  | AC | 0.1707 | 1.262 | 0.0007306 |
| 13 | rs4265682  | 100537995 | VGCNL1   | intron 14               | q33.1  | GT | 0.5957 | 1.213 | 0.0007307 |
| 10 | rs10887256 | 85963395  | PCDH21   | intron 16               | q23.1  | CG | 0.2249 | 0.805 | 0.0007329 |
| 21 | rs2837246  | 40136888  | PCP4     | 24328 base upstream     | q22.2  | CT | 0.3119 | 1.209 | 0.0007337 |
| 4  | rs11935719 | 136722837 | PABPC4L  | 1380484 base downstream | q28.3  | AG | 0.2032 | 1.244 | 0.0007338 |
| 7  | rs650045   | 125579026 | GRM8     | 286866 base upstream    | q31.33 | AG | 0.1221 | 0.761 | 0.0007338 |
| 4  | rs11935664 | 136722856 | PABPC4L  | 1380503 base downstream | q28.3  | CT | 0.7968 | 0.804 | 0.0007345 |
| 4  | rs9312697  | 58878691  | IGFBP7   | 1207395 base downstream | q12    | AG | 0.7192 | 1.216 | 0.0007352 |
| 4  | rs11940405 | 136722879 | PABPC4L  | 1380526 base downstream | q28.3  | GT | 0.2032 | 1.244 | 0.0007352 |
| 7  | rs626762   | 125563862 | GRM8     | 302030 base upstream    | q31.33 | AC | 0.1263 | 0.752 | 0.0007357 |
| 1  | rs1863618  | 81222832  | LPHN2    | 815837 base upstream    | p31.1  | AG | 0.6063 | 1.207 | 0.0007365 |
| 4  | rs13145036 | 136727429 | PABPC4L  | 1385076 base downstream | q28.3  | AG | 0.7967 | 0.804 | 0.0007384 |
| 4  | rs7667350  | 136726319 | PABPC4L  | 1383966 base downstream | q28.3  | AG | 0.7967 | 0.804 | 0.0007384 |
| 7  | rs553952   | 125579136 | GRM8     | 286756 base upstream    | q31.33 | CT | 0.8779 | 1.313 | 0.0007384 |
| 11 | rs6483549  | 18884861  | MRGPRX1  | 27074 base upstream     | p15.1  | CG | 0.8934 | 0.748 | 0.0007385 |
| 4  | rs7662409  | 136726126 | PABPC4L  | 1383773 base downstream | q28.3  | CG | 0.7967 | 0.804 | 0.0007385 |
| 4  | rs13131704 | 136725872 | PABPC4L  | 1383519 base downstream | q28.3  | AT | 0.7968 | 0.804 | 0.0007386 |
| 4  | rs12643192 | 136725857 | PABPC4L  | 1383504 base downstream | q28.3  | CG | 0.7968 | 0.804 | 0.0007388 |
| 4  | rs1479789  | 136724400 | PABPC4L  | 1382047 base downstream | q28.3  | AG | 0.2032 | 1.244 | 0.0007388 |

|    |            |           |          |                         |        |    |        |       |           |
|----|------------|-----------|----------|-------------------------|--------|----|--------|-------|-----------|
| 4  | rs1479788  | 136724188 | PABPC4L  | 1381835 base downstream | q28.3  | AT | 0.7968 | 0.804 | 0.000739  |
| 4  | rs1479787  | 136724155 | PABPC4L  | 1381802 base downstream | q28.3  | CT | 0.7968 | 0.804 | 0.0007391 |
| 4  | rs2127459  | 136723951 | PABPC4L  | 1381598 base downstream | q28.3  | GT | 0.7968 | 0.804 | 0.0007391 |
| 17 | rs16945089 | 11467738  | DNAH9    | intron 6                | p12    | CG | 0.8325 | 1.297 | 0.0007391 |
| 11 | rs2896547  | 18884296  | MRGPRX1  | 27639 base upstream     | p15.1  | AG | 0.1066 | 1.337 | 0.0007393 |
| 4  | rs2054506  | 136723423 | PABPC4L  | 1381070 base downstream | q28.3  | CG | 0.7968 | 0.804 | 0.0007395 |
| 4  | rs2054505  | 136723371 | PABPC4L  | 1381018 base downstream | q28.3  | CT | 0.7968 | 0.804 | 0.0007398 |
| 6  | rs2073298  | 127720097 | ECHDC1   | 13650 base downstream   | q22.33 | CT | 0.9638 | 0.653 | 0.0007399 |
| 6  | rs6569485  | 127717884 | ECHDC1   | 11437 base downstream   | q22.33 | CT | 0.9638 | 0.653 | 0.0007399 |
| 6  | rs9375505  | 127739111 | ECHDC1   | 32664 base downstream   | q22.33 | CT | 0.0362 | 1.532 | 0.0007399 |
| 11 | rs1384648  | 18886008  | MRGPRX1  | 25927 base upstream     | p15.1  | CT | 0.8934 | 0.748 | 0.0007404 |
| 13 | rs9553915  | 26340889  | GPR12    | 108925 base downstream  | q12.13 | AG | 0.8674 | 0.763 | 0.0007406 |
| 8  | rs753722   | 134285128 | WISP1    | intron 1                | q24.22 | CG | 0.2951 | 0.822 | 0.0007415 |
| 6  | rs9385420  | 127744028 | ECHDC1   | 37581 base downstream   | q22.33 | AG | 0.9638 | 0.653 | 0.0007419 |
| 4  | rs12504808 | 189571301 | FLJ36180 | 265658 base downstream  | q35.2  | CT | 0.8039 | 0.789 | 0.0007419 |
| 4  | rs12504780 | 189571191 | FLJ36180 | 265548 base downstream  | q35.2  | CT | 0.8039 | 0.789 | 0.000743  |
| 6  | rs4713614  | 33235965  | COL11A2  | 2481 base upstream      | p21.32 | AC | 0.5472 | 0.835 | 0.000744  |
| 12 | rs7297205  | 10712107  | STYK1    | intron 10               | p13.2  | CT | 0.637  | 1.208 | 0.0007441 |
| 6  | rs802274   | 124525158 | TCBA1    | intron 1                | q22.31 | AG | 0.1238 | 0.765 | 0.0007444 |
| 12 | rs10507059 | 94629965  | NTN4     | intron 6                | q22    | CT | 0.7683 | 0.811 | 0.000746  |
| 1  | rs3813634  | 51248076  | CDKN2C   | 35181 base downstream   | p33    | AG | 0.4287 | 0.837 | 0.0007474 |
| 10 | rs12220219 | 30437845  | KIAA1462 | 61039 base downstream   | p11.23 | CT | 0.3109 | 1.206 | 0.0007477 |
| 4  | rs11935796 | 136716070 | PABPC4L  | 1373717 base downstream | q28.3  | AG | 0.7862 | 0.807 | 0.0007478 |
| 7  | rs556478   | 125579381 | GRM8     | 286511 base upstream    | q31.33 | CT | 0.1222 | 0.762 | 0.0007502 |
| 12 | rs1376796  | 128846311 | TMEM132D | intron 8                | q24.33 | GT | 0.7061 | 0.825 | 0.0007504 |
| 12 | rs1031400  | 128845279 | TMEM132D | intron 8                | q24.33 | AG | 0.706  | 0.825 | 0.0007514 |
| 2  | rs12373805 | 46174598  | PRKCE    | intron 11               | p21    | AG | 0.7998 | 1.249 | 0.0007518 |
| 4  | rs6823080  | 151134607 | DCLK2    | 84922 base upstream     | q31.3  | AC | 0.1629 | 1.265 | 0.0007524 |
| 6  | rs10944710 | 94788810  | EPHA7    | 602817 base downstream  | q16.1  | CT | 0.4381 | 1.193 | 0.000753  |
| 2  | rs4849144  | 113516520 | IL1F8    | intron 5                | q13    | AG | 0.323  | 1.209 | 0.0007531 |
| 2  | rs7569284  | 113520034 | IL1F8    | intron 5                | q13    | AG | 0.677  | 0.827 | 0.0007534 |
| 4  | rs11133555 | 58880555  | IGFBP7   | 1209259 base downstream | q12    | AG | 0.7192 | 1.216 | 0.0007538 |
| 2  | rs7557928  | 113514439 | IL1F8    | intron 5                | q13    | GT | 0.677  | 0.827 | 0.0007538 |
| 10 | rs17295031 | 30437462  | KIAA1462 | 60656 base downstream   | p11.23 | AG | 0.687  | 0.831 | 0.0007544 |
| 20 | rs4597612  | 5209578   | PROKR2   | 21108 base upstream     | p12.3  | GT | 0.5045 | 0.839 | 0.0007545 |
| 8  | rs2012994  | 14907628  | SGCZ     | intron 7                | p22    | AG | 0.5076 | 1.195 | 0.0007555 |
| 7  | rs475294   | 125580265 | GRM8     | 285627 base upstream    | q31.33 | CT | 0.8778 | 1.312 | 0.0007556 |

|    |            |           |          |                         |        |    |        |       |           |
|----|------------|-----------|----------|-------------------------|--------|----|--------|-------|-----------|
| 2  | rs10196888 | 55889730  | EFEMP1   | 56875 base upstream     | p16.1  | AG | 0.9423 | 0.688 | 0.000756  |
| 2  | rs7592062  | 51622416  | NRXN1    | 509238 base downstream  | p16.3  | AG | 0.4406 | 1.2   | 0.0007562 |
| 12 | rs3021522  | 2779406   | FKBP4    | intron 6                | p13.33 | CG | 0.9572 | 0.641 | 0.0007573 |
| 2  | rs2862776  | 113514395 | IL1F8    | intron 5                | q13    | AG | 0.6769 | 0.827 | 0.0007582 |
| 2  | rs1569190  | 51645271  | NRXN1    | 532093 base downstream  | p16.3  | GT | 0.5753 | 0.83  | 0.0007582 |
| 3  | rs2618115  | 27918162  | EOMES    | 179373 base downstream  | p24.1  | AG | 0.1161 | 0.728 | 0.0007586 |
| 16 | rs9936914  | 7338583   | A2BP1    | intron 4                | p13.2  | AT | 0.096  | 1.339 | 0.0007587 |
| 16 | rs9934586  | 7338453   | A2BP1    | intron 4                | p13.2  | AG | 0.904  | 0.747 | 0.000759  |
| 8  | rs6981423  | 135164118 | ZNF406   | 395095 base upstream    | q24.22 | CT | 0.448  | 1.193 | 0.0007599 |
| 12 | rs10773708 | 128847165 | TMEM132D | intron 8                | q24.33 | AG | 0.7061 | 0.825 | 0.0007612 |
| 7  | rs501483   | 125580852 | GRM8     | 285040 base upstream    | q31.33 | AG | 0.8778 | 1.312 | 0.0007612 |
| 6  | rs12206267 | 51868413  | PKHD1    | intron 24               | p12.2  | CT | 0.8131 | 1.27  | 0.0007639 |
| 8  | rs7001769  | 54436653  | OPRK1    | 109906 base downstream  | q11.23 | CT | 0.1654 | 0.783 | 0.000764  |
| 9  | rs11138196 | 81214260  | CHCHD9   | 17490 base downstream   | q21.31 | AT | 0.0281 | 1.716 | 0.0007648 |
| 2  | rs2950945  | 51622443  | NRXN1    | 509265 base downstream  | p16.3  | AG | 0.4405 | 1.2   | 0.0007656 |
| 11 | rs1973238  | 18888602  | MRGPRX1  | 23333 base upstream     | p15.1  | CG | 0.8934 | 0.748 | 0.0007665 |
| 1  | rs2811280  | 176952870 | RALGPS2  | 8052 base upstream      | q25.2  | AG | 0.6538 | 1.204 | 0.0007673 |
| 9  | rs1217339  | 71237419  | APBA1    | intron 2                | q21.11 | AG | 0.1895 | 0.795 | 0.0007676 |
| 12 | rs7135319  | 2212678   | CACNA1C  | intron 3                | p13.33 | AG | 0.9669 | 0.588 | 0.0007677 |
| 9  | rs3737172  | 71237455  | APBA1    | intron 2                | q21.11 | CT | 0.8105 | 1.258 | 0.0007681 |
| 3  | rs658339   | 8907353   | RAD18    | intron 2                | p25.3  | AG | 0.0364 | 0.607 | 0.0007681 |
| 4  | rs13122550 | 136728035 | PABPC4L  | 1385682 base downstream | q28.3  | CT | 0.2036 | 1.243 | 0.0007682 |
| 5  | rs2610243  | 64066108  | P18SRP   | intron 2                | q12.3  | GT | 0.5247 | 0.838 | 0.0007683 |
| 9  | rs1217338  | 71237918  | APBA1    | intron 2                | q21.11 | CT | 0.1895 | 0.795 | 0.0007687 |
| 12 | rs1981655  | 2777987   | FKBP4    | intron 3                | p13.33 | AT | 0.9571 | 0.642 | 0.0007696 |
| 3  | rs1505600  | 63493882  | SYNPR    | intron 2                | p14.2  | CG | 0.202  | 0.801 | 0.0007697 |
| 3  | rs17014951 | 24627817  | THRB     | 116500 base downstream  | p24.2  | AG | 0.7373 | 1.235 | 0.0007697 |
| 7  | rs505793   | 125581262 | GRM8     | 284630 base upstream    | q31.33 | CT | 0.1222 | 0.762 | 0.0007705 |
| 3  | rs1394902  | 63494733  | SYNPR    | intron 2                | p14.2  | CT | 0.798  | 1.248 | 0.0007712 |
| 3  | rs6446043  | 59331465  | FLJ42117 | 320710 base downstream  | p14.2  | AT | 0.6153 | 0.833 | 0.0007718 |
| 2  | rs2305150  | 113505787 | IL1F8    | EXON 5                  | q13    | CT | 0.4426 | 1.196 | 0.0007722 |
| 2  | rs13415031 | 107784033 | SLC5A7   | 185393 base upstream    | q12.3  | CG | 0.346  | 0.812 | 0.0007722 |
| 5  | rs315892   | 2511057   | IRX2     | 288822 base upstream    | p15.33 | CT | 0.3243 | 0.821 | 0.0007724 |
| 6  | rs9401954  | 127754044 | ECHDC1   | 47597 base downstream   | q22.33 | AC | 0.9636 | 0.656 | 0.0007733 |
| 3  | rs1394901  | 63494767  | SYNPR    | intron 2                | p14.2  | CT | 0.202  | 0.801 | 0.0007735 |
| 10 | rs2151114  | 30532611  | PAPD1    | 109153 base upstream    | p11.23 | AG | 0.2774 | 1.215 | 0.0007738 |
| 3  | rs4392412  | 63495077  | SYNPR    | intron 2                | p14.2  | GT | 0.202  | 0.801 | 0.0007742 |

|    |            |           |          |                         |        |    |        |       |           |
|----|------------|-----------|----------|-------------------------|--------|----|--------|-------|-----------|
| 3  | rs652424   | 54720595  | CACNA2D3 | intron 11               | p14.3  | CT | 0.584  | 1.206 | 0.0007742 |
| 12 | rs7980332  | 97115342  | TMPO     | 318197 base upstream    | q23.1  | AC | 0.8658 | 1.317 | 0.000775  |
| 3  | rs985370   | 63495157  | SYNPR    | intron 2                | p14.2  | AG | 0.798  | 1.248 | 0.0007751 |
| 3  | rs589281   | 54722284  | CACNA2D3 | intron 11               | p14.3  | CT | 0.584  | 1.206 | 0.0007751 |
| 21 | rs2837258  | 40145943  | PCP4     | 15273 base upstream     | q22.2  | AC | 0.3118 | 1.208 | 0.0007763 |
| 21 | rs8132770  | 39947754  | B3GALT5  | 3369 base upstream      | q22.2  | AT | 0.4775 | 0.84  | 0.0007767 |
| 4  | rs7435172  | 58886180  | IGFBP7   | 1214884 base downstream | q12    | CT | 0.7192 | 1.215 | 0.0007773 |
| 3  | rs7653488  | 30343934  | TGFBR2   | 279063 base upstream    | p24.1  | CT | 0.3593 | 0.831 | 0.0007774 |
| 3  | rs985368   | 63495430  | SYNPR    | intron 2                | p14.2  | CT | 0.798  | 1.248 | 0.0007782 |
| 14 | rs6571583  | 32680251  | NPAS3    | intron 1                | q13.1  | CT | 0.2833 | 1.216 | 0.0007791 |
| 18 | rs4940191  | 48362228  | DCC      | intron 1                | q21.2  | AG | 0.1479 | 0.773 | 0.0007795 |
| 6  | rs13212414 | 30248519  | TRIM15   | 67 base downstream      | p21.33 | AT | 0.9519 | 0.667 | 0.0007799 |
| 2  | rs6723695  | 55891570  | EFEMP1   | 55035 base upstream     | p16.1  | CT | 0.0578 | 1.449 | 0.00078   |
| 20 | rs7261606  | 47387176  | KCNB1    | 34735 base upstream     | q13.13 | CT | 0.9258 | 0.71  | 0.00078   |
| 3  | rs985367   | 63495515  | SYNPR    | intron 2                | p14.2  | GT | 0.798  | 1.248 | 0.0007805 |
| 4  | rs1522096  | 58882568  | IGFBP7   | 1211272 base downstream | q12    | AG | 0.2809 | 0.823 | 0.0007813 |
| 2  | rs2160020  | 210710058 | FLJ23861 | intron 13               | q34    | CT | 0.0992 | 1.338 | 0.0007816 |
| 5  | rs1562414  | 2550120   | IRX2     | 249759 base upstream    | p15.33 | AG | 0.3681 | 0.832 | 0.0007821 |
| 4  | rs4865165  | 57460303  | REST     | 8495 base upstream      | q12    | CT | 0.5042 | 1.19  | 0.0007827 |
| 2  | rs7594860  | 107931186 | SLC5A7   | 38240 base upstream     | q12.3  | CT | 0.19   | 0.793 | 0.0007828 |
| 5  | rs325524   | 104073920 | NUDT12   | 1147531 base downstream | q21.2  | CG | 0.1664 | 1.265 | 0.0007829 |
| 6  | rs9397585  | 153438568 | RGS17    | intron 4                | q25.2  | CT | 0.3442 | 1.206 | 0.0007832 |
| 16 | rs12443717 | 26204460  | HS3ST4   | 147951 base downstream  | p12.1  | AT | 0.7741 | 0.803 | 0.0007834 |
| 4  | rs9998008  | 57460809  | REST     | 7989 base upstream      | q12    | AG | 0.5041 | 1.19  | 0.0007843 |
| 20 | rs4384857  | 5209440   | PROKR2   | 21246 base upstream     | p12.3  | CG | 0.5045 | 0.84  | 0.0007858 |
| 2  | rs1226954  | 229880420 | PID1     | 36119 base downstream   | q36.3  | CT | 0.935  | 0.698 | 0.0007859 |
| 12 | rs2291060  | 13256321  | EMP1     | intron 2                | p13.1  | AG | 0.9319 | 1.436 | 0.000786  |
| 11 | rs996263   | 41016901  | LRRC4C   | 744661 base downstream  | p12    | AT | 0.9638 | 1.69  | 0.0007861 |
| 3  | rs1505599  | 63499833  | SYNPR    | intron 2                | p14.2  | AC | 0.7979 | 1.248 | 0.0007869 |
| 2  | rs7577580  | 55892233  | EFEMP1   | 54372 base upstream     | p16.1  | GT | 0.0578 | 1.449 | 0.0007873 |
| 6  | rs9445968  | 68815788  | BAI3     | 586564 base upstream    | q12    | GT | 0.9836 | 2.206 | 0.0007876 |
| 6  | rs802273   | 124523315 | TCBA1    | intron 1                | q22.31 | GT | 0.1236 | 0.765 | 0.0007883 |
| 2  | rs3768752  | 46196507  | PRKCE    | intron 11               | p21    | AC | 0.757  | 1.238 | 0.0007884 |
| 2  | rs10202504 | 46174837  | PRKCE    | intron 11               | p21    | CG | 0.2002 | 0.801 | 0.0007893 |
| 13 | rs4483759  | 44574009  | GTF2F2   | 18662 base upstream     | q14.12 | CG | 0.8409 | 0.792 | 0.0007893 |
| 2  | rs13385188 | 29149180  | FLJ34931 | EXON 2                  | p23.2  | AG | 0.2573 | 1.242 | 0.0007896 |
| 3  | rs1505598  | 63499920  | SYNPR    | intron 2                | p14.2  | CG | 0.7979 | 1.248 | 0.0007897 |

|    |            |           |          |                         |        |    |        |       |           |
|----|------------|-----------|----------|-------------------------|--------|----|--------|-------|-----------|
| 4  | rs4435727  | 149818435 | NR3C2    | 235342 base downstream  | q31.23 | CG | 0.2445 | 0.812 | 0.0007898 |
| 6  | rs6938872  | 127762249 | KIAA0408 | 41179 base upstream     | q22.33 | GT | 0.9636 | 0.656 | 0.00079   |
| 10 | rs10826770 | 30535057  | PAPD1    | 106707 base upstream    | p11.23 | AG | 0.7226 | 0.823 | 0.0007905 |
| 12 | rs11062158 | 2196239   | CACNA1C  | intron 3                | p13.33 | CT | 0.0307 | 1.679 | 0.000791  |
| 3  | rs4616634  | 63500043  | SYNPR    | intron 2                | p14.2  | AG | 0.7979 | 1.247 | 0.0007913 |
| 7  | rs507803   | 125581531 | GRM8     | 284361 base upstream    | q31.33 | CT | 0.8777 | 1.311 | 0.0007914 |
| 20 | rs6099656  | 55497673  | HMG1L1   | 184 base downstream     | q13.31 | CT | 0.6224 | 0.831 | 0.0007915 |
| 10 | rs17700240 | 110644600 | XPNPEP1  | 969913 base upstream    | q25.1  | AG | 0.8184 | 1.261 | 0.0007916 |
| 12 | rs10848640 | 2196430   | CACNA1C  | intron 3                | p13.33 | CG | 0.9693 | 0.596 | 0.000792  |
| 10 | rs17778423 | 110644569 | XPNPEP1  | 969944 base upstream    | q25.1  | CG | 0.8185 | 1.261 | 0.0007921 |
| 12 | rs10848641 | 2196442   | CACNA1C  | intron 3                | p13.33 | CT | 0.0307 | 1.679 | 0.000793  |
| 11 | rs1145180  | 115317381 | CADM1    | 436930 base downstream  | q23.2  | AG | 0.6491 | 0.835 | 0.0007936 |
| 6  | rs9277029  | 33106784  | HLA-DOA  | 21417 base downstream   | p21.32 | CT | 0.709  | 1.227 | 0.0007938 |
| 6  | rs3024466  | 6089856   | F13A1    | EXON 1                  | p25.1  | AC | 0.1688 | 1.262 | 0.0007938 |
| 5  | rs17351308 | 104115918 | NUDT12   | 1189529 base downstream | q21.2  | AG | 0.1668 | 1.272 | 0.0007941 |
| 4  | rs11946618 | 136712040 | PABPC4L  | 1369687 base downstream | q28.3  | CG | 0.2142 | 1.238 | 0.0007951 |
| 8  | rs2023100  | 109459433 | TTC35    | 65595 base upstream     | q23.1  | GT | 0.3534 | 1.2   | 0.0007969 |
| 18 | rs1550567  | 48343516  | DCC      | intron 1                | q21.2  | AG | 0.148  | 0.774 | 0.0007971 |
| 2  | rs1900287  | 113514036 | IL1F8    | intron 5                | q13    | AG | 0.6769 | 0.828 | 0.0007973 |
| 7  | rs613484   | 125581817 | GRM8     | 284075 base upstream    | q31.33 | AG | 0.8777 | 1.31  | 0.0007974 |
| 5  | rs17156764 | 104004713 | NUDT12   | 1078324 base downstream | q21.2  | AC | 0.1706 | 1.263 | 0.0007975 |
| 2  | rs1797386  | 232122582 | NMUR1    | 19135 base downstream   | q37.1  | CT | 0.9204 | 0.726 | 0.0007976 |
| 5  | rs12514247 | 104001831 | NUDT12   | 1075442 base downstream | q21.2  | CT | 0.1706 | 1.263 | 0.0007976 |
| 5  | rs11242529 | 104007471 | NUDT12   | 1081082 base downstream | q21.2  | CT | 0.1706 | 1.263 | 0.0007977 |
| 3  | rs7633928  | 129060018 | MGLL     | 35277 base downstream   | q21.3  | AG | 0.8448 | 0.775 | 0.0007979 |
| 6  | rs10806484 | 94777061  | EPHA7    | 591068 base downstream  | q16.1  | AC | 0.4441 | 1.192 | 0.0007982 |
| 4  | rs13146643 | 136728154 | PABPC4L  | 1385801 base downstream | q28.3  | AG | 0.7963 | 0.805 | 0.0007983 |
| 9  | rs10124892 | 7514847   | C9orf123 | 271645 base upstream    | p24.1  | CT | 0.5788 | 1.191 | 0.0007984 |
| 6  | rs9277027  | 33106216  | HLA-DOA  | 20849 base downstream   | p21.32 | AG | 0.7089 | 1.227 | 0.0007989 |
| 21 | rs2833927  | 32930403  | SYNJ1    | intron 2                | q22.11 | CT | 0.9626 | 1.678 | 0.0007989 |
| 12 | rs7305301  | 2212897   | CACNA1C  | intron 3                | p13.33 | CG | 0.9671 | 0.587 | 0.0007992 |
| 7  | rs639211   | 125564375 | GRM8     | 301517 base upstream    | q31.33 | AC | 0.879  | 1.32  | 0.0007992 |
| 2  | rs2160236  | 40410780  | SLC8A1   | intron 8                | p22.1  | CG | 0.3564 | 1.202 | 0.0008003 |
| 4  | rs13122996 | 136728247 | PABPC4L  | 1385894 base downstream | q28.3  | AT | 0.2037 | 1.242 | 0.0008009 |
| 2  | rs10200693 | 29148520  | FLJ34931 | EXON 2                  | p23.2  | AG | 0.7441 | 0.807 | 0.000802  |
| 9  | rs4269591  | 7517298   | C9orf123 | 269194 base upstream    | p24.1  | CT | 0.4226 | 0.837 | 0.0008024 |
| 5  | rs17057166 | 159180592 | ADRA1B   | 95725 base upstream     | q33.3  | CT | 0.9288 | 1.422 | 0.0008026 |

|    |            |           |           |                         |        |    |        |       |           |
|----|------------|-----------|-----------|-------------------------|--------|----|--------|-------|-----------|
| 6  | rs9375498  | 127637134 | RNF146    | intron 1                | q22.33 | AG | 0.0366 | 1.527 | 0.0008027 |
| 8  | rs6471719  | 59543277  | LOC137886 | 16664 base downstream   | q12.1  | CT | 0.2659 | 0.813 | 0.0008037 |
| 12 | rs4077227  | 94632343  | NTN4      | intron 7                | q22    | CT | 0.7679 | 0.812 | 0.0008043 |
| 5  | rs325492   | 104118535 | NUDT12    | 1192146 base downstream | q21.2  | CT | 0.8332 | 0.786 | 0.0008048 |
| 2  | rs12995836 | 51625568  | NRXN1     | 512390 base downstream  | p16.3  | CT | 0.5624 | 0.837 | 0.0008052 |
| 8  | rs10089406 | 109516004 | TTC35     | 9024 base upstream      | q23.1  | CT | 0.6099 | 0.828 | 0.0008054 |
| 5  | rs161776   | 104119377 | NUDT12    | 1192988 base downstream | q21.2  | CG | 0.1668 | 1.272 | 0.0008062 |
| 3  | rs8177184  | 134947186 | TF        | 738 base upstream       | q22.1  | AG | 0.8365 | 0.789 | 0.0008063 |
| 4  | rs13101421 | 136728703 | PABPC4L   | 1386350 base downstream | q28.3  | CT | 0.7963 | 0.805 | 0.0008068 |
| 5  | rs3915771  | 13536969  | DNAH5     | 206467 base upstream    | p15.2  | AG | 0.4421 | 0.836 | 0.0008092 |
| 9  | rs10758876 | 7517476   | C9orf123  | 269016 base upstream    | p24.1  | GT | 0.421  | 0.84  | 0.0008111 |
| 2  | rs333217   | 107976696 | SLC5A7    | intron 4                | q12.3  | AG | 0.1847 | 0.776 | 0.0008116 |
| 4  | rs1111986  | 154168497 | KIAA1727  | 48199 base downstream   | q31.3  | AG | 0.309  | 1.204 | 0.0008117 |
| 21 | rs743331   | 33329836  | OLIG2     | 6466 base downstream    | q22.11 | CT | 0.4545 | 1.194 | 0.0008119 |
| 7  | rs489655   | 125583266 | GRM8      | 282626 base upstream    | q31.33 | AG | 0.8776 | 1.31  | 0.0008123 |
| 8  | rs6471720  | 59547229  | CYP7A1    | 18061 base upstream     | q12.1  | AG | 0.2658 | 0.813 | 0.0008124 |
| 2  | rs2862772  | 113507953 | IL1F8     | intron 5                | q13    | CG | 0.5573 | 0.837 | 0.0008125 |
| 2  | rs1375055  | 46193882  | PRKCE     | intron 11               | p21    | AG | 0.7596 | 1.238 | 0.0008126 |
| 21 | rs9982859  | 40139786  | PCP4      | 21430 base upstream     | q22.2  | CT | 0.312  | 1.206 | 0.0008126 |
| 12 | rs17287370 | 94635249  | NTN4      | intron 7                | q22    | AG | 0.7678 | 0.812 | 0.0008128 |
| 6  | rs375912   | 33124706  | HLA-DPA1  | 16065 base upstream     | p21.32 | CT | 0.3493 | 0.823 | 0.0008128 |
| 1  | rs2275644  | 66603687  | PDE4B     | intron 12               | p31.3  | AG | 0.0699 | 0.695 | 0.0008128 |
| 5  | rs17167077 | 98947056  | CHD1      | 656918 base downstream  | q21.1  | CT | 0.0491 | 0.656 | 0.0008131 |
| 1  | rs7538869  | 66603910  | PDE4B     | intron 12               | p31.3  | GT | 0.0699 | 0.695 | 0.0008137 |
| 18 | rs1626332  | 21693248  | SS18      | 156968 base upstream    | q11.2  | AT | 0.4027 | 0.833 | 0.0008141 |
| 9  | rs10758877 | 7517489   | C9orf123  | 269003 base upstream    | p24.1  | CT | 0.579  | 1.191 | 0.0008144 |
| 21 | rs2837218  | 40081847  | LOC150084 | intron 5                | q22.2  | CG | 0.3169 | 1.205 | 0.0008144 |
| 6  | rs6941233  | 127767426 | KIAA0408  | 36002 base upstream     | q22.33 | AG | 0.963  | 0.647 | 0.0008145 |
| 4  | rs2035291  | 136730370 | PABPC4L   | 1388017 base downstream | q28.3  | CG | 0.2037 | 1.242 | 0.0008151 |
| 9  | rs10758879 | 7517926   | C9orf123  | 268566 base upstream    | p24.1  | AG | 0.579  | 1.191 | 0.0008157 |
| 9  | rs10758880 | 7518098   | C9orf123  | 268394 base upstream    | p24.1  | AC | 0.579  | 1.191 | 0.0008161 |
| 2  | rs13414755 | 107783958 | SLC5A7    | 185468 base upstream    | q12.3  | AC | 0.3479 | 0.816 | 0.0008161 |
| 2  | rs2697236  | 197753891 | ANKRD44   | intron 24               | q33.1  | CG | 0.0346 | 0.599 | 0.0008171 |
| 5  | rs161777   | 104119936 | NUDT12    | 1193547 base downstream | q21.2  | CT | 0.1668 | 1.272 | 0.0008172 |
| 18 | rs8098773  | 21695157  | SS18      | 155059 base upstream    | q11.2  | CT | 0.5974 | 1.201 | 0.0008178 |
| 4  | rs7696796  | 183403463 | ODZ3      | 78667 base upstream     | q35.1  | AG | 0.243  | 0.817 | 0.0008182 |
| 21 | rs12627540 | 40136828  | PCP4      | 24388 base upstream     | q22.2  | AC | 0.3164 | 1.208 | 0.0008184 |

|    |            |           |           |                         |        |    |        |       |           |
|----|------------|-----------|-----------|-------------------------|--------|----|--------|-------|-----------|
| 1  | rs2311985  | 66607403  | PDE4B     | intron 16               | p31.3  | AG | 0.9301 | 1.437 | 0.0008194 |
| 2  | rs2697235  | 197754509 | ANKRD44   | intron 24               | q33.1  | AG | 0.9654 | 1.671 | 0.0008197 |
| 2  | rs1226959  | 229877443 | PID1      | 33142 base downstream   | q36.3  | AC | 0.9299 | 0.717 | 0.00082   |
| 21 | rs2837249  | 40141997  | PCP4      | 19219 base upstream     | q22.2  | AG | 0.312  | 1.206 | 0.00082   |
| 9  | rs10815626 | 7518239   | C9orf123  | 268253 base upstream    | p24.1  | CT | 0.579  | 1.191 | 0.0008201 |
| 2  | rs2697234  | 197755262 | ANKRD44   | intron 24               | q33.1  | CT | 0.0346 | 0.599 | 0.0008203 |
| 7  | rs2237701  | 107409386 | LAMB1     | intron 27               | q31.1  | AG | 0.4318 | 1.193 | 0.0008206 |
| 7  | rs2237702  | 107409524 | LAMB1     | intron 27               | q31.1  | AG | 0.5682 | 0.838 | 0.0008208 |
| 8  | rs2977527  | 134282867 | WISP1     | intron 1                | q24.22 | AG | 0.292  | 0.824 | 0.0008208 |
| 3  | rs4530474  | 124810365 | MYLK      | 3469 base upstream      | q21.1  | CT | 0.1765 | 1.25  | 0.0008224 |
| 4  | rs2035292  | 136730572 | PABPC4L   | 1388219 base downstream | q28.3  | AG | 0.2037 | 1.241 | 0.0008226 |
| 21 | rs2834072  | 33332334  | OLIG2     | 8964 base downstream    | q22.11 | AG | 0.5455 | 0.838 | 0.0008227 |
| 1  | rs11208951 | 66960695  | SGIP1     | intron 19               | p31.3  | CT | 0.6969 | 0.826 | 0.0008235 |
| 4  | rs13129036 | 136728656 | PABPC4L   | 1386303 base downstream | q28.3  | CT | 0.2249 | 1.24  | 0.0008253 |
| 2  | rs6542736  | 107782134 | SLC5A7    | 187292 base upstream    | q12.3  | AG | 0.3483 | 0.816 | 0.0008261 |
| 17 | rs7224952  | 51880345  | ANKFN1    | intron 9                | q22    | CT | 0.7037 | 0.825 | 0.0008264 |
| 2  | rs12617786 | 159755255 | TANC1     | intron 16               | q24.2  | AG | 0.0141 | 2.133 | 0.0008267 |
| 8  | rs7005262  | 14903851  | SGCZ      | intron 7                | p22    | AG | 0.4978 | 1.196 | 0.000827  |
| 22 | rs134406   | 33909346  | HMG2L1    | 74142 base upstream     | q12.3  | CT | 0.2738 | 0.823 | 0.0008271 |
| 3  | rs848146   | 124806457 | MYLK      | 7377 base upstream      | q21.1  | CG | 0.1764 | 1.25  | 0.0008274 |
| 12 | rs12228890 | 2201258   | CACNA1C   | intron 3                | p13.33 | AC | 0.0307 | 1.675 | 0.0008276 |
| 7  | rs730497   | 44190246  | GCK       | intron 9                | p13    | AG | 0.1785 | 1.263 | 0.0008282 |
| 7  | rs7811868  | 26507861  | SNX10     | 127399 base downstream  | p15.2  | AG | 0.3776 | 1.2   | 0.0008289 |
| 10 | rs17769395 | 110505088 | XPNPEP1   | 1109425 base upstream   | q25.1  | CT | 0.8132 | 1.266 | 0.0008289 |
| 7  | rs515267   | 125583763 | GRM8      | 282129 base upstream    | q31.33 | GT | 0.1224 | 0.764 | 0.000829  |
| 13 | rs2025418  | 44583847  | GTF2F2    | 8824 base upstream      | q14.12 | CT | 0.1642 | 1.263 | 0.0008294 |
| 3  | rs2626028  | 124812622 | MYLK      | 1212 base upstream      | q21.1  | CT | 0.1765 | 1.25  | 0.0008312 |
| 2  | rs1597156  | 46192218  | PRKCE     | intron 11               | p21    | CT | 0.24   | 0.808 | 0.0008312 |
| 8  | rs11780184 | 109448088 | TTC35     | 76940 base upstream     | q23.1  | CT | 0.3533 | 1.2   | 0.0008332 |
| 7  | rs2908289  | 44190467  | GCK       | intron 9                | p13    | AG | 0.1785 | 1.262 | 0.0008333 |
| 6  | rs9490138  | 121574075 | C6orf170  | intron 11               | q22.31 | CT | 0.1665 | 1.257 | 0.0008336 |
| 21 | rs2837225  | 40087332  | LOC150084 | EXON 8                  | q22.2  | AC | 0.2958 | 1.219 | 0.0008341 |
| 1  | rs204262   | 166081092 | SAC       | intron 12               | q24.2  | AG | 0.2273 | 1.252 | 0.0008344 |
| 10 | rs12146350 | 22883117  | PIP4K2A   | intron 4                | p12.2  | CG | 0.398  | 0.837 | 0.0008346 |
| 3  | rs820479   | 124805854 | MYLK      | 7980 base upstream      | q21.1  | AG | 0.8236 | 0.8   | 0.0008355 |
| 2  | rs6759150  | 55901698  | EFEMP1    | 44907 base upstream     | p16.1  | AT | 0.9422 | 0.691 | 0.0008359 |
| 20 | rs2145083  | 5208540   | PROKR2    | 22146 base upstream     | p12.3  | AG | 0.4954 | 1.19  | 0.0008363 |

|    |            |           |         |                         |        |    |        |       |           |
|----|------------|-----------|---------|-------------------------|--------|----|--------|-------|-----------|
| 1  | rs12038866 | 48006804  | FOXD2   | 327854 base downstream  | p33    | CG | 0.5987 | 1.2   | 0.0008363 |
| 20 | rs6038115  | 5209132   | PROKR2  | 21554 base upstream     | p12.3  | AG | 0.5045 | 0.84  | 0.0008364 |
| 20 | rs4553880  | 5209206   | PROKR2  | 21480 base upstream     | p12.3  | CT | 0.5045 | 0.84  | 0.0008364 |
| 20 | rs6038114  | 5209029   | PROKR2  | 21657 base upstream     | p12.3  | AG | 0.5046 | 0.84  | 0.0008364 |
| 11 | rs12294675 | 2799123   | KCNQ1   | intron 15               | p15.5  | AG | 0.164  | 1.275 | 0.0008374 |
| 11 | rs10834744 | 3638426   | ART1    | intron 3                | p15.4  | AG | 0.827  | 0.79  | 0.0008379 |
| 6  | rs811418   | 124526687 | TCBA1   | intron 1                | q22.31 | AC | 0.1232 | 0.766 | 0.000838  |
| 14 | rs10132087 | 31527742  | ARHGAP5 | 88503 base upstream     | q12    | CT | 0.2029 | 1.261 | 0.0008384 |
| 6  | rs7762541  | 92124822  | MAP3K7  | 771194 base downstream  | q16.1  | CT | 0.4408 | 1.193 | 0.000839  |
| 8  | rs4382455  | 134283373 | WISP1   | intron 1                | q24.22 | AC | 0.292  | 0.824 | 0.0008396 |
| 2  | rs17257436 | 229875214 | PID1    | 30913 base downstream   | q36.3  | AG | 0.9292 | 0.72  | 0.0008396 |
| 4  | rs7694930  | 136731046 | PABPC4L | 1388693 base downstream | q28.3  | AC | 0.7962 | 0.806 | 0.0008402 |
| 6  | rs9353824  | 92118422  | MAP3K7  | 764794 base downstream  | q16.1  | AG | 0.5592 | 0.838 | 0.0008409 |
| 1  | rs6691740  | 66625390  | PDE4B   | 12541 base downstream   | p31.3  | AC | 0.0699 | 0.697 | 0.0008413 |
| 1  | rs6703929  | 66624749  | PDE4B   | 11900 base downstream   | p31.3  | CT | 0.07   | 0.698 | 0.0008414 |
| 1  | rs6701234  | 66624485  | PDE4B   | 11636 base downstream   | p31.3  | GT | 0.07   | 0.698 | 0.0008415 |
| 8  | rs1597145  | 109444070 | TTC35   | 80958 base upstream     | q23.1  | GT | 0.3532 | 1.2   | 0.000842  |
| 13 | rs7984473  | 67662316  | PCDH9   | 959852 base downstream  | q21.33 | AG | 0.9771 | 1.91  | 0.0008422 |
| 3  | rs8177181  | 134946488 | TF      | 1436 base upstream      | q22.1  | AT | 0.1638 | 1.266 | 0.0008431 |
| 2  | rs16825971 | 229875567 | PID1    | 31266 base downstream   | q36.3  | CT | 0.9292 | 0.72  | 0.0008433 |
| 3  | rs993668   | 27906342  | EOMES   | 167553 base downstream  | p24.1  | CG | 0.8915 | 1.384 | 0.0008435 |
| 8  | rs1448160  | 109442301 | TTC35   | 82727 base upstream     | q23.1  | CT | 0.6468 | 0.833 | 0.0008438 |
| 20 | rs6085062  | 5207966   | PROKR2  | 22720 base upstream     | p12.3  | CG | 0.4953 | 1.19  | 0.0008446 |
| 3  | rs861890   | 124801210 | MYLK    | 12624 base upstream     | q21.1  | AG | 0.8236 | 0.801 | 0.0008452 |
| 22 | rs134434   | 33921035  | HMG2L1  | 62453 base upstream     | q12.3  | AG | 0.7261 | 1.214 | 0.0008454 |
| 4  | rs7654065  | 136731472 | PABPC4L | 1389119 base downstream | q28.3  | AC | 0.2038 | 1.241 | 0.0008456 |
| 4  | rs17148325 | 71084769  | APIN    | 12063 base upstream     | q13.3  | CT | 0.8444 | 1.303 | 0.0008458 |
| 5  | rs1120480  | 104014181 | NUDT12  | 1087792 base downstream | q21.2  | CT | 0.8297 | 0.793 | 0.0008459 |
| 2  | rs6734993  | 107922950 | SLC5A7  | 46476 base upstream     | q12.3  | CT | 0.1902 | 0.794 | 0.0008467 |
| 20 | rs6085061  | 5207931   | PROKR2  | 22755 base upstream     | p12.3  | CT | 0.5047 | 0.84  | 0.0008469 |
| 6  | rs7746647  | 154741048 | PIP3-E  | 21456 base downstream   | q25.2  | AT | 0.945  | 1.475 | 0.0008469 |
| 1  | rs12239708 | 66627158  | PDE4B   | 14309 base downstream   | p31.3  | AT | 0.0698 | 0.697 | 0.0008471 |
| 14 | rs10132140 | 31529811  | ARHGAP5 | 86434 base upstream     | q12    | AG | 0.7972 | 0.793 | 0.0008473 |
| 21 | rs10854398 | 39943622  | B3GALT5 | 7501 base upstream      | q22.2  | CT | 0.5182 | 1.198 | 0.0008485 |
| 4  | rs968774   | 34724145  | CENTD1  | 1019871 base upstream   | p15.1  | AG | 0.0181 | 2.007 | 0.0008485 |
| 4  | rs11944567 | 136734593 | PABPC4L | 1392240 base downstream | q28.3  | CT | 0.2038 | 1.24  | 0.0008487 |
| 4  | rs11099350 | 136734221 | PABPC4L | 1391868 base downstream | q28.3  | AG | 0.2038 | 1.24  | 0.0008488 |



|    |            |           |          |                         |        |    |        |       |           |
|----|------------|-----------|----------|-------------------------|--------|----|--------|-------|-----------|
| 4  | rs13142176 | 136736073 | PABPC4L  | 1393720 base downstream | q28.3  | CT | 0.2038 | 1.24  | 0.0008491 |
| 4  | rs968773   | 34724210  | CENTD1   | 1019806 base upstream   | p15.1  | AC | 0.0181 | 2.007 | 0.0008491 |
| 4  | rs11723306 | 136733600 | PABPC4L  | 1391247 base downstream | q28.3  | CT | 0.2038 | 1.24  | 0.0008493 |
| 10 | rs576505   | 30516612  | PAPD1    | 125152 base upstream    | p11.23 | CT | 0.2787 | 1.211 | 0.0008494 |
| 10 | rs4749520  | 30336364  | KIAA1462 | 7025 base upstream      | p11.23 | AG | 0.4755 | 1.188 | 0.0008495 |
| 4  | rs7692855  | 136735906 | PABPC4L  | 1393553 base downstream | q28.3  | CT | 0.7962 | 0.806 | 0.0008496 |
| 2  | rs2198715  | 184920491 | C2orf10  | 250846 base upstream    | q32.1  | CT | 0.1912 | 0.799 | 0.0008496 |
| 8  | rs12542624 | 2652265   | CSMD1    | 128016 base upstream    | p23.2  | AG | 0.2399 | 1.224 | 0.0008499 |
| 4  | rs11935087 | 136733042 | PABPC4L  | 1390689 base downstream | q28.3  | AG | 0.7962 | 0.806 | 0.00085   |
| 4  | rs2016168  | 136732580 | PABPC4L  | 1390227 base downstream | q28.3  | CT | 0.2038 | 1.24  | 0.0008502 |
| 4  | rs1038152  | 136732373 | PABPC4L  | 1390020 base downstream | q28.3  | AT | 0.7962 | 0.806 | 0.0008505 |
| 1  | rs12406429 | 66628614  | PDE4B    | 15765 base downstream   | p31.3  | AG | 0.0698 | 0.697 | 0.0008508 |
| 12 | rs10219684 | 9918211   | CLEC2B   | 4486 base downstream    | p13.31 | CT | 0.3065 | 1.223 | 0.0008512 |
| 12 | rs768860   | 114335802 | THRAP2   | 544963 base upstream    | q24.21 | GT | 0.7674 | 1.242 | 0.0008513 |
| 22 | rs4821375  | 33922615  | HMG2L1   | 60873 base upstream     | q12.3  | CT | 0.7261 | 1.214 | 0.0008525 |
| 2  | rs12693375 | 184951945 | C2orf10  | 219392 base upstream    | q32.1  | CT | 0.8084 | 1.253 | 0.0008527 |
| 2  | rs2579409  | 197769903 | ANKRD44  | intron 25               | q33.1  | GT | 0.0346 | 0.6   | 0.0008536 |
| 22 | rs134386   | 33903856  | HMG2L1   | 79632 base upstream     | q12.3  | CT | 0.7262 | 1.214 | 0.0008538 |
| 3  | rs860224   | 124820104 | MYLK     | intron 1                | q21.1  | CG | 0.8233 | 0.801 | 0.0008548 |
| 10 | rs11596191 | 110659654 | XPNPEP1  | 954859 base upstream    | q25.1  | CT | 0.183  | 0.795 | 0.0008551 |
| 20 | rs6515995  | 5204774   | PROKR2   | 25912 base upstream     | p12.3  | GT | 0.5048 | 0.841 | 0.0008556 |
| 5  | rs12522864 | 104015822 | NUDT12   | 1089433 base downstream | q21.2  | AG | 0.8297 | 0.793 | 0.0008558 |
| 4  | rs6816076  | 136737904 | PABPC4L  | 1395551 base downstream | q28.3  | AG | 0.7962 | 0.806 | 0.0008558 |
| 10 | rs3793889  | 112017646 | MXI1     | intron 3                | q25.2  | AG | 0.9205 | 1.413 | 0.000856  |
| 12 | rs7964025  | 114336692 | THRAP2   | 544073 base upstream    | q24.21 | AG | 0.2326 | 0.806 | 0.0008563 |
| 7  | rs10808041 | 146312527 | CNTNAP2  | intron 3                | q35    | AT | 0.9106 | 0.739 | 0.0008565 |
| 6  | rs2180130  | 92134035  | MAP3K7   | 780407 base downstream  | q16.1  | AG | 0.5605 | 0.838 | 0.0008573 |
| 3  | rs7623889  | 11452387  | ATG7     | intron 18               | p25.3  | CT | 0.9543 | 1.587 | 0.0008573 |
| 1  | rs10788998 | 55471611  | USP24    | 18261 base downstream   | p32.3  | AG | 0.7478 | 0.817 | 0.0008573 |
| 1  | rs1498354  | 66953077  | SGIP1    | intron 18               | p31.3  | AT | 0.3032 | 1.209 | 0.0008578 |
| 20 | rs6053245  | 5204385   | PROKR2   | 26301 base upstream     | p12.3  | CT | 0.5048 | 0.841 | 0.0008579 |
| 3  | rs9841664  | 30348345  | TGFBR2   | 274652 base upstream    | p24.1  | CT | 0.64   | 1.202 | 0.0008579 |
| 9  | rs16937690 | 19646396  | SLC24A2  | intron 9                | p22.1  | AG | 0.646  | 1.201 | 0.0008583 |
| 5  | rs12189083 | 104017956 | NUDT12   | 1091567 base downstream | q21.2  | CT | 0.8297 | 0.793 | 0.0008586 |
| 10 | rs1418276  | 30337993  | KIAA1462 | 5396 base upstream      | p11.23 | CT | 0.4756 | 1.187 | 0.0008592 |
| 13 | rs17064600 | 74984164  | COMMD6   | 13186 base upstream     | q22.2  | CT | 0.2977 | 0.809 | 0.0008595 |
| 5  | rs12189097 | 104018213 | NUDT12   | 1091824 base downstream | q21.2  | CT | 0.8297 | 0.793 | 0.0008599 |

|    |            |           |          |                         |        |    |        |       |           |
|----|------------|-----------|----------|-------------------------|--------|----|--------|-------|-----------|
| 21 | rs12233311 | 33331127  | OLIG2    | 7757 base downstream    | q22.11 | AG | 0.4487 | 1.193 | 0.0008604 |
| 21 | rs2243683  | 17225142  | C21orf34 | 323729 base downstream  | q21.1  | AG | 0.4704 | 1.197 | 0.0008604 |
| 10 | rs1418278  | 30338084  | KIAA1462 | 5305 base upstream      | p11.23 | AG | 0.5243 | 0.842 | 0.0008606 |
| 22 | rs5748309  | 17946365  | CLDN5    | 53505 base downstream   | q11.21 | CT | 0.274  | 0.808 | 0.0008608 |
| 2  | rs13031086 | 29141985  | FLJ34931 | intron 1                | p23.2  | CT | 0.748  | 0.813 | 0.0008614 |
| 2  | rs12712970 | 46187198  | PRKCE    | intron 11               | p21    | AG | 0.7605 | 1.238 | 0.0008615 |
| 5  | rs7445539  | 104020427 | NUDT12   | 1094038 base downstream | q21.2  | AG | 0.1703 | 1.261 | 0.0008623 |
| 10 | rs11592575 | 110748773 | XPNPEP1  | 865740 base upstream    | q25.1  | CT | 0.1831 | 0.796 | 0.0008629 |
| 22 | rs134378   | 33899690  | HMG2L1   | 83798 base upstream     | q12.3  | GT | 0.7263 | 1.214 | 0.000863  |
| 22 | rs4821376  | 33922689  | HMG2L1   | 60799 base upstream     | q12.3  | AG | 0.7261 | 1.214 | 0.0008634 |
| 10 | rs10826749 | 30338528  | KIAA1462 | 4861 base upstream      | p11.23 | CT | 0.4757 | 1.187 | 0.0008638 |
| 16 | rs7197967  | 70564733  | DHODH    | 35410 base upstream     | q22.3  | AG | 0.1321 | 1.318 | 0.000864  |
| 2  | rs13015290 | 184940461 | C2orf10  | 230876 base upstream    | q32.1  | AT | 0.1915 | 0.798 | 0.0008643 |
| 2  | rs17429535 | 184931648 | C2orf10  | 239689 base upstream    | q32.1  | CT | 0.1913 | 0.799 | 0.0008644 |
| 8  | rs7812466  | 109467321 | TTC35    | 57707 base upstream     | q23.1  | AG | 0.3534 | 1.198 | 0.0008645 |
| 10 | rs17697405 | 110517348 | XPNPEP1  | 1097165 base upstream   | q25.1  | CT | 0.1828 | 0.792 | 0.0008646 |
| 8  | rs4363174  | 109471830 | TTC35    | 53198 base upstream     | q23.1  | CT | 0.3534 | 1.198 | 0.0008647 |
| 2  | rs13394642 | 55903459  | EFEMP1   | 43146 base upstream     | p16.1  | AG | 0.9422 | 0.691 | 0.0008651 |
| 8  | rs10108399 | 109466087 | TTC35    | 58941 base upstream     | q23.1  | CT | 0.6466 | 0.834 | 0.0008655 |
| 10 | rs11194333 | 110747661 | XPNPEP1  | 866852 base upstream    | q25.1  | CT | 0.1836 | 0.797 | 0.0008661 |
| 6  | rs6910080  | 92125869  | MAP3K7   | 772241 base downstream  | q16.1  | AG | 0.5591 | 0.838 | 0.0008664 |
| 22 | rs6000718  | 36129946  | LRRC62   | intron 1                | q13.1  | AG | 0.7535 | 0.804 | 0.0008667 |
| 2  | rs10203961 | 184932641 | C2orf10  | 238696 base upstream    | q32.1  | CT | 0.8087 | 1.252 | 0.0008672 |
| 4  | rs2089184  | 136739233 | PABPC4L  | 1396880 base downstream | q28.3  | CG | 0.7962 | 0.807 | 0.0008675 |
| 3  | rs16840812 | 134945497 | TF       | 2427 base upstream      | q22.1  | CT | 0.1641 | 1.265 | 0.0008676 |
| 21 | rs225424   | 42619764  | TFF3     | 10989 base downstream   | q22.3  | AG | 0.5045 | 1.212 | 0.0008676 |
| 3  | rs820458   | 124821147 | MYLK     | intron 2                | q21.1  | CT | 0.1767 | 1.249 | 0.0008683 |
| 6  | rs9379723  | 25253691  | LRRC16   | 133935 base upstream    | p22.2  | CT | 0.7977 | 1.265 | 0.0008687 |
| 4  | rs11737477 | 136740519 | PABPC4L  | 1398166 base downstream | q28.3  | GT | 0.7962 | 0.807 | 0.000869  |
| 6  | rs9388306  | 124511753 | TCBA1    | intron 1                | q22.31 | CG | 0.8774 | 1.317 | 0.0008692 |
| 22 | rs134443   | 33925528  | HMG2L1   | 57960 base upstream     | q12.3  | CT | 0.2739 | 0.824 | 0.0008702 |
| 6  | rs2146252  | 124512460 | TCBA1    | intron 1                | q22.31 | CT | 0.8774 | 1.317 | 0.0008705 |
| 22 | rs134445   | 33926150  | HMG2L1   | 57338 base upstream     | q12.3  | CT | 0.2739 | 0.824 | 0.0008705 |
| 9  | rs12339463 | 81273412  | CHCHD9   | 76642 base downstream   | q21.31 | AG | 0.0283 | 1.71  | 0.0008707 |
| 2  | rs2579408  | 197777124 | ANKRD44  | 6117 base downstream    | q33.1  | AG | 0.9654 | 1.666 | 0.0008708 |
| 21 | rs741866   | 40129825  | PCP4     | 31391 base upstream     | q22.2  | CT | 0.6843 | 0.83  | 0.0008708 |
| 8  | rs12544826 | 36281532  | KCNU1    | 479467 base upstream    | p12    | AG | 0.8234 | 0.793 | 0.0008712 |

|    |            |           |         |                         |        |    |        |       |           |
|----|------------|-----------|---------|-------------------------|--------|----|--------|-------|-----------|
| 8  | rs4735062  | 109492076 | TTC35   | 32952 base upstream     | q23.1  | GT | 0.6479 | 0.835 | 0.0008714 |
| 12 | rs11067584 | 114337140 | THRAP2  | 543625 base upstream    | q24.21 | CT | 0.7671 | 1.237 | 0.0008716 |
| 3  | rs9813563  | 32247502  | CMTM8   | 7672 base upstream      | p22.3  | CG | 0.161  | 1.256 | 0.0008725 |
| 1  | rs10889649 | 66950593  | SGIP1   | intron 18               | p31.3  | AG | 0.3033 | 1.209 | 0.0008726 |
| 22 | rs134442   | 33925331  | HMG2L1  | 58157 base upstream     | q12.3  | CT | 0.7261 | 1.213 | 0.0008728 |
| 5  | rs17350038 | 104055382 | NUDT12  | 1128993 base downstream | q21.2  | CG | 0.1694 | 1.261 | 0.0008738 |
| 2  | rs2712900  | 197778099 | ANKRD44 | 7092 base downstream    | q33.1  | CT | 0.0347 | 0.6   | 0.0008739 |
| 8  | rs4735063  | 109492672 | TTC35   | 32356 base upstream     | q23.1  | AT | 0.6479 | 0.835 | 0.000874  |
| 9  | rs10867388 | 81271470  | CHCHD9  | 74700 base downstream   | q21.31 | AG | 0.9717 | 0.585 | 0.000874  |
| 7  | rs518066   | 125584083 | GRM8    | 281809 base upstream    | q31.33 | CT | 0.8775 | 1.308 | 0.000874  |
| 20 | rs996389   | 5203899   | PROKR2  | 26787 base upstream     | p12.3  | GT | 0.495  | 1.189 | 0.0008752 |
| 6  | rs2146253  | 124512495 | TCBA1   | intron 1                | q22.31 | AG | 0.8774 | 1.316 | 0.0008759 |
| 2  | rs10200357 | 184938744 | C2orf10 | 232593 base upstream    | q32.1  | AT | 0.8086 | 1.252 | 0.0008763 |
| 1  | rs1281173  | 110896325 | KCNA10  | 33005 base downstream   | p13.3  | CT | 0.9107 | 0.721 | 0.0008765 |
| 21 | rs1004663  | 40131660  | PCP4    | 29556 base upstream     | q22.2  | CG | 0.3158 | 1.204 | 0.0008777 |
| 3  | rs2972479  | 117048717 | LSAMP   | intron 3                | q13.31 | CT | 0.0702 | 1.407 | 0.0008795 |
| 8  | rs6998163  | 109493977 | TTC35   | 31051 base upstream     | q23.1  | CT | 0.3521 | 1.198 | 0.0008797 |
| 8  | rs13249775 | 109494368 | TTC35   | 30660 base upstream     | q23.1  | CT | 0.6479 | 0.835 | 0.0008811 |
| 5  | rs1908159  | 2506377   | IRX2    | 293502 base upstream    | p15.33 | AG | 0.6068 | 1.193 | 0.0008813 |
| 3  | rs9855198  | 178807690 | TBL1XR1 | 409948 base downstream  | q26.32 | AG | 0.2753 | 1.214 | 0.0008818 |
| 6  | rs2008699  | 124512907 | TCBA1   | intron 1                | q22.31 | CT | 0.8775 | 1.315 | 0.0008819 |
| 13 | rs9510082  | 21757174  | FGF9    | 582990 base downstream  | q12.11 | AG | 0.3832 | 1.204 | 0.0008826 |
| 8  | rs1955032  | 109495470 | TTC35   | 29558 base upstream     | q23.1  | GT | 0.6479 | 0.835 | 0.0008831 |
| 20 | rs6038111  | 5203159   | PROKR2  | 27527 base upstream     | p12.3  | AC | 0.505  | 0.841 | 0.0008832 |
| 1  | rs4951409  | 202827613 | LRRN5   | 25314 base upstream     | q32.1  | AT | 0.6717 | 0.83  | 0.0008837 |
| 1  | rs3867319  | 98737348  | SNX7    | 162452 base upstream    | p21.3  | AG | 0.0711 | 0.703 | 0.0008839 |
| 5  | rs17415237 | 104037774 | NUDT12  | 1111385 base downstream | q21.2  | AC | 0.1697 | 1.261 | 0.000884  |
| 1  | rs9426772  | 21832177  | RAP1GA1 | intron 23               | p36.12 | CT | 0.5377 | 0.831 | 0.0008842 |
| 8  | rs10098022 | 109497697 | TTC35   | 27331 base upstream     | q23.1  | AG | 0.3521 | 1.198 | 0.0008845 |
| 8  | rs4543566  | 6812946   | DEFA1   | 9634 base upstream      | p23.1  | CG | 0.8862 | 1.322 | 0.0008847 |
| 5  | rs12516369 | 104047674 | NUDT12  | 1121285 base downstream | q21.2  | AG | 0.1696 | 1.26  | 0.0008866 |
| 13 | rs9583770  | 89489076  | GPC5    | 1359811 base upstream   | q31.3  | AG | 0.1983 | 0.8   | 0.0008867 |
| 8  | rs13281088 | 109476961 | TTC35   | 48067 base upstream     | q23.1  | CT | 0.3534 | 1.198 | 0.0008869 |
| 12 | rs12319878 | 130855942 | SFRS8   | 5707 base downstream    | q24.33 | CT | 0.3967 | 0.838 | 0.0008889 |
| 5  | rs6892501  | 104028035 | NUDT12  | 1101646 base downstream | q21.2  | AC | 0.1702 | 1.26  | 0.0008895 |
| 20 | rs2234397  | 5221382   | PROKR2  | 9304 base upstream      | p12.3  | AG | 0.5078 | 0.839 | 0.0008895 |
| 10 | rs17769443 | 110506183 | XPNPEP1 | 1108330 base upstream   | q25.1  | AG | 0.8231 | 1.266 | 0.0008905 |

|    |            |           |               |                         |        |    |        |       |           |
|----|------------|-----------|---------------|-------------------------|--------|----|--------|-------|-----------|
| 8  | rs2156740  | 109477725 | TTC35         | 47303 base upstream     | q23.1  | CG | 0.3534 | 1.198 | 0.000891  |
| 5  | rs11134123 | 5754291   | KIAA0947      | 210953 base downstream  | p15.32 | CG | 0.0309 | 0.561 | 0.000891  |
| 7  | rs1689330  | 53069533  | DKFZp564N247z | 1309 base upstream      | p12.1  | CG | 0.2067 | 1.239 | 0.0008916 |
| 8  | rs10103966 | 3339206   | CSDM1         | intron 60               | p23.2  | CG | 0.7855 | 1.244 | 0.0008919 |
| 6  | rs17749408 | 73415061  | KCNQ5         | intron 1                | q13    | AG | 0.1825 | 1.249 | 0.0008927 |
| 10 | rs716595   | 111996476 | MXI1          | intron 3                | q25.2  | AG | 0.0798 | 0.71  | 0.0008928 |
| 7  | rs1799884  | 44195593  | YKT6          | 11509 base upstream     | p13    | CT | 0.8221 | 0.798 | 0.0008931 |
| 6  | rs2008708  | 124513036 | TCBA1         | intron 1                | q22.31 | AG | 0.1225 | 0.761 | 0.0008938 |
| 6  | rs12664094 | 68836202  | BAI3          | 566150 base upstream    | q12    | CT | 0.984  | 2.174 | 0.0008938 |
| 8  | rs1499682  | 3342219   | CSDM1         | intron 60               | p23.2  | AT | 0.2144 | 0.804 | 0.0008942 |
| 10 | rs12250102 | 110625352 | XPNPEP1       | 989161 base upstream    | q25.1  | CT | 0.82   | 1.26  | 0.0008942 |
| 20 | rs6038110  | 5202928   | PROKR2        | 27758 base upstream     | p12.3  | AG | 0.5051 | 0.841 | 0.0008944 |
| 10 | rs17769499 | 110506325 | XPNPEP1       | 1108188 base upstream   | q25.1  | AC | 0.177  | 0.79  | 0.0008953 |
| 7  | rs4947777  | 53069854  | DKFZp564N247z | 988 base upstream       | p12.1  | GT | 0.2067 | 1.239 | 0.0008958 |
| 3  | rs13315037 | 58047511  | FLNB          | intron 4                | p14.3  | GT | 0.0747 | 0.702 | 0.0008961 |
| 21 | rs2833934  | 32946315  | SYNJ1         | intron 10               | q22.11 | CT | 0.9626 | 1.664 | 0.0008964 |
| 2  | rs1583938  | 107777551 | SLC5A7        | 191875 base upstream    | q12.3  | AC | 0.6461 | 1.216 | 0.0008965 |
| 8  | rs1893887  | 109479131 | TTC35         | 45897 base upstream     | q23.1  | CG | 0.3534 | 1.198 | 0.0008977 |
| 4  | rs1842259  | 136723916 | PABPC4L       | 1381563 base downstream | q28.3  | AG | 0.7951 | 0.807 | 0.0008982 |
| 22 | rs134370   | 33897413  | RAXLX         | 84035 base downstream   | q12.3  | CG | 0.7263 | 1.214 | 0.0008988 |
| 16 | rs8062885  | 6609627   | A2BP1         | intron 2                | p13.2  | CG | 0.4877 | 1.193 | 0.0008997 |
| 1  | rs2045624  | 202851008 | LRRN5         | 1919 base upstream      | q32.1  | CG | 0.6897 | 0.829 | 0.0009003 |
| 21 | rs9980807  | 40127381  | LOC150084     | 31488 base downstream   | q22.2  | CT | 0.6842 | 0.831 | 0.0009004 |
| 8  | rs1893886  | 109479249 | TTC35         | 45779 base upstream     | q23.1  | CT | 0.6466 | 0.835 | 0.0009006 |
| 6  | rs6569377  | 124513424 | TCBA1         | intron 1                | q22.31 | CT | 0.1224 | 0.761 | 0.0009016 |
| 2  | rs13036001 | 184952504 | C2orf10       | 218833 base upstream    | q32.1  | CT | 0.8057 | 1.262 | 0.0009021 |
| 10 | rs12412423 | 111992160 | MXI1          | intron 2                | q25.2  | CG | 0.9201 | 1.409 | 0.0009022 |
| 20 | rs6038109  | 5202768   | PROKR2        | 27918 base upstream     | p12.3  | CT | 0.5052 | 0.841 | 0.0009027 |
| 9  | rs11138240 | 81266134  | CHCHD9        | 69364 base downstream   | q21.31 | CT | 0.9716 | 0.586 | 0.0009035 |
| 7  | rs520807   | 125584379 | GRM8          | 281513 base upstream    | q31.33 | CT | 0.8774 | 1.306 | 0.0009049 |
| 4  | rs877619   | 9846004   | WDR1          | 118333 base downstream  | p16.1  | AG | 0.9897 | 0.45  | 0.0009054 |
| 22 | rs134318   | 33890448  | RAXLX         | 77070 base downstream   | q12.3  | CT | 0.7263 | 1.214 | 0.0009055 |
| 1  | rs1547644  | 66948145  | SGIP1         | intron 18               | p31.3  | AG | 0.6968 | 0.828 | 0.0009056 |
| 8  | rs2156739  | 109479507 | TTC35         | 45521 base upstream     | q23.1  | AC | 0.3534 | 1.197 | 0.0009063 |
| 2  | rs7569095  | 107772978 | SLC5A7        | 196448 base upstream    | q12.3  | CG | 0.6448 | 1.214 | 0.0009084 |
| 9  | rs11138238 | 81261735  | CHCHD9        | 64965 base downstream   | q21.31 | CT | 0.9716 | 0.587 | 0.0009092 |
| 3  | rs3772968  | 117050666 | LSAMP         | intron 3                | q13.31 | AG | 0.0702 | 1.406 | 0.0009094 |

|    |            |           |         |                        |        |    |        |       |           |
|----|------------|-----------|---------|------------------------|--------|----|--------|-------|-----------|
| 7  | rs2701039  | 107410778 | LAMB1   | intron 27              | q31.1  | AG | 0.4311 | 1.192 | 0.0009102 |
| 12 | rs2334868  | 2805760   | NRIP2   | EXON 1                 | p13.33 | AG | 0.9576 | 0.651 | 0.0009107 |
| 3  | rs4613421  | 71412562  | FOXP1   | intron 16              | p14.1  | CG | 0.688  | 0.83  | 0.0009109 |
| 6  | rs6932946  | 124513519 | TCBA1   | intron 1               | q22.31 | GT | 0.8776 | 1.313 | 0.0009123 |
| 12 | rs994302   | 65462660  | GRIP1   | 103640 base downstream | q14.3  | CG | 0.5534 | 1.193 | 0.0009129 |
| 16 | rs500285   | 26654324  | TNT     | 331204 base upstream   | p12.1  | CG | 0.9436 | 0.675 | 0.0009132 |
| 1  | rs11206524 | 55460604  | USP24   | 7254 base downstream   | p32.3  | CT | 0.2534 | 1.224 | 0.0009135 |
| 10 | rs10884688 | 110624642 | XPNPEP1 | 989871 base upstream   | q25.1  | AG | 0.82   | 1.259 | 0.0009147 |
| 18 | rs11081233 | 6396037   | L3MBTL4 | intron 19              | p11.31 | AG | 0.3078 | 0.821 | 0.0009155 |
| 7  | rs6975024  | 44198411  | YKT6    | 8691 base upstream     | p13    | CT | 0.178  | 1.253 | 0.0009157 |
| 4  | rs10520281 | 175716769 | HPGD    | 36583 base downstream  | q34.1  | AG | 0.912  | 1.403 | 0.000916  |
| 1  | rs4926672  | 55462173  | USP24   | 8823 base downstream   | p32.3  | AG | 0.2534 | 1.224 | 0.0009163 |
| 8  | rs1955025  | 109481042 | TTC35   | 43986 base upstream    | q23.1  | AC | 0.3534 | 1.197 | 0.0009174 |
| 2  | rs2113389  | 38221238  | CYP1B1  | 64442 base downstream  | p22.2  | CT | 0.862  | 0.783 | 0.0009182 |
| 10 | rs17127166 | 111979315 | MXI1    | intron 2               | q25.2  | AG | 0.0801 | 0.71  | 0.0009182 |
| 10 | rs12258374 | 110629257 | XPNPEP1 | 985256 base upstream   | q25.1  | CT | 0.7486 | 1.224 | 0.0009187 |
| 11 | rs2403354  | 18898424  | MRGPRX1 | 13511 base upstream    | p15.1  | CT | 0.1065 | 1.337 | 0.000919  |
| 14 | rs10483520 | 39253036  | FBXO33  | 281665 base downstream | q21.1  | AG | 0.1004 | 1.329 | 0.000919  |
| 8  | rs2023107  | 109483397 | TTC35   | 41631 base upstream    | q23.1  | AC | 0.3534 | 1.197 | 0.0009198 |
| 7  | rs473762   | 125586751 | GRM8    | 279141 base upstream   | q31.33 | AT | 0.8774 | 1.306 | 0.0009198 |
| 10 | rs10884687 | 110618205 | XPNPEP1 | 996308 base upstream   | q25.1  | AT | 0.82   | 1.259 | 0.0009208 |
| 8  | rs2977530  | 134284294 | WISP1   | intron 1               | q24.22 | AG | 0.292  | 0.825 | 0.0009221 |
| 6  | rs17749420 | 73415342  | KCNQ5   | intron 1               | q13    | CG | 0.1824 | 1.248 | 0.0009223 |
| 22 | rs4618151  | 33926311  | HMG2L1  | 57177 base upstream    | q12.3  | AC | 0.2739 | 0.825 | 0.0009233 |
| 10 | rs960731   | 85956138  | PCDH21  | intron 10              | q23.1  | GT | 0.7553 | 1.226 | 0.0009236 |
| 4  | rs7671048  | 175716127 | HPGD    | 35941 base downstream  | q34.1  | CT | 0.9119 | 1.4   | 0.000924  |
| 20 | rs6038108  | 5201641   | PROKR2  | 29045 base upstream    | p12.3  | CT | 0.5053 | 0.841 | 0.0009241 |
| 10 | rs11194286 | 110617893 | XPNPEP1 | 996620 base upstream   | q25.1  | CT | 0.82   | 1.259 | 0.0009244 |
| 12 | rs2160432  | 87296520  | KITLG   | 114179 base upstream   | q21.32 | CT | 0.9224 | 0.728 | 0.0009254 |
| 12 | rs2407649  | 87295390  | KITLG   | 115309 base upstream   | q21.32 | CT | 0.9222 | 0.728 | 0.0009255 |
| 7  | rs593446   | 125587627 | GRM8    | 278265 base upstream   | q31.33 | CT | 0.8774 | 1.306 | 0.0009255 |
| 2  | rs12467641 | 45955645  | PRKCE   | intron 2               | p21    | AT | 0.7733 | 1.244 | 0.0009258 |
| 12 | rs11062164 | 2203913   | CACNA1C | intron 3               | p13.33 | AC | 0.0308 | 1.666 | 0.0009261 |
| 2  | rs6742654  | 160112937 | BAZ2B   | intron 35              | q24.2  | CT | 0.8682 | 1.325 | 0.0009261 |
| 3  | rs2972493  | 116979664 | LSAMP   | 32175 base upstream    | q13.31 | AC | 0.8748 | 0.768 | 0.0009261 |
| 7  | rs4607517  | 44202193  | YKT6    | 4909 base upstream     | p13    | AG | 0.178  | 1.253 | 0.0009268 |
| 12 | rs10858718 | 87293574  | KITLG   | 117125 base upstream   | q21.32 | CG | 0.0779 | 1.372 | 0.0009269 |

|    |            |           |           |                        |        |    |        |       |           |
|----|------------|-----------|-----------|------------------------|--------|----|--------|-------|-----------|
| 14 | rs7155495  | 32679185  | NPAS3     | intron 1               | q13.1  | CT | 0.6687 | 0.835 | 0.0009274 |
| 10 | rs945824   | 110531064 | XPNPEP1   | 1083449 base upstream  | q25.1  | CT | 0.8172 | 1.261 | 0.0009281 |
| 2  | rs13012389 | 29141970  | FLJ34931  | intron 1               | p23.2  | CT | 0.2518 | 1.23  | 0.0009288 |
| 7  | rs2971668  | 44209963  | YKT6      | intron 1               | p13    | CG | 0.178  | 1.253 | 0.0009288 |
| 8  | rs3862101  | 17651768  | MTUS1     | intron 13              | p22    | CT | 0.8506 | 1.282 | 0.0009293 |
| 22 | rs867198   | 37038552  | CSNK1E    | intron 9               | q13.1  | CT | 0.9455 | 0.683 | 0.0009293 |
| 1  | rs6704254  | 119091964 | TBX15     | 135224 base upstream   | p12    | CT | 0.9649 | 1.655 | 0.0009296 |
| 13 | rs9318155  | 72776677  | KLF5      | 227001 base downstream | q22.1  | AC | 0.5935 | 1.2   | 0.0009298 |
| 9  | rs2991695  | 71238297  | APBA1     | intron 2               | q21.11 | AG | 0.1895 | 0.798 | 0.0009329 |
| 14 | rs4982055  | 32677389  | NPAS3     | intron 1               | q13.1  | GT | 0.6681 | 0.832 | 0.000933  |
| 1  | rs2147780  | 119091517 | TBX15     | 135671 base upstream   | p12    | AG | 0.9649 | 1.655 | 0.000933  |
| 8  | rs2023104  | 109484593 | TTC35     | 40435 base upstream    | q23.1  | AG | 0.3534 | 1.197 | 0.0009341 |
| 15 | rs10852029 | 36730429  | FLJ35695  | 45661 base upstream    | q14    | AG | 0.5233 | 1.2   | 0.0009343 |
| 10 | rs17769672 | 110511738 | XPNPEP1   | 1102775 base upstream  | q25.1  | CG | 0.8229 | 1.264 | 0.0009344 |
| 9  | rs1340123  | 81242882  | CHCHD9    | 46112 base downstream  | q21.31 | CT | 0.0285 | 1.702 | 0.0009351 |
| 10 | rs11196070 | 114461555 | VTI1A     | intron 7               | q25.2  | CG | 0.928  | 0.721 | 0.0009356 |
| 4  | rs11723554 | 15282435  | FBXL5     | 16324 base downstream  | p15.33 | CG | 0.0999 | 0.741 | 0.000936  |
| 10 | rs12220246 | 30438125  | KIAA1462  | 61319 base downstream  | p11.23 | CT | 0.3107 | 1.202 | 0.0009374 |
| 5  | rs17652448 | 149554727 | SLC6A7    | intron 2               | q33.1  | CT | 0.9762 | 0.584 | 0.0009377 |
| 7  | rs2021886  | 107414230 | LAMB1     | intron 29              | q31.1  | AG | 0.4232 | 1.196 | 0.0009377 |
| 4  | rs10516289 | 15281298  | FBXL5     | 15187 base downstream  | p15.33 | CT | 0.0999 | 0.741 | 0.0009384 |
| 12 | rs11062165 | 2204109   | CACNA1C   | intron 3               | p13.33 | CT | 0.0308 | 1.665 | 0.0009384 |
| 10 | rs12249791 | 110615683 | XPNPEP1   | 998830 base upstream   | q25.1  | CT | 0.18   | 0.794 | 0.0009387 |
| 4  | rs4696159  | 154165619 | KIAA1727  | 45321 base downstream  | q31.3  | CT | 0.6898 | 0.828 | 0.00094   |
| 8  | rs12375378 | 12897996  | C8orf79   | intron 2               | p22    | AC | 0.9384 | 1.461 | 0.0009402 |
| 2  | rs7570249  | 128371789 | MGC4268   | 12885 base downstream  | q14.3  | GT | 0.3251 | 1.2   | 0.0009408 |
| 6  | rs802249   | 124515810 | TCBA1     | intron 1               | q22.31 | CG | 0.8778 | 1.31  | 0.0009409 |
| 2  | rs10495767 | 29140696  | FLJ34931  | EXON 1                 | p23.2  | AG | 0.2263 | 1.236 | 0.0009409 |
| 14 | rs8011345  | 32677988  | NPAS3     | intron 1               | q13.1  | AG | 0.6683 | 0.833 | 0.0009412 |
| 8  | rs6469185  | 109508139 | TTC35     | 16889 base upstream    | q23.1  | AT | 0.362  | 1.197 | 0.0009416 |
| 1  | rs2887429  | 202831635 | LRRN5     | 21292 base upstream    | q32.1  | GT | 0.328  | 1.203 | 0.0009424 |
| 9  | rs12352718 | 81239935  | CHCHD9    | 43165 base downstream  | q21.31 | CT | 0.9715 | 0.588 | 0.0009425 |
| 5  | rs2240782  | 149543189 | CDX1      | intron 2               | q33.1  | AC | 0.0235 | 1.727 | 0.0009426 |
| 12 | rs10777110 | 87293154  | KITLG     | 117545 base upstream   | q21.32 | AG | 0.0779 | 1.371 | 0.0009441 |
| 10 | rs6584895  | 110512515 | XPNPEP1   | 1101998 base upstream  | q25.1  | CT | 0.8229 | 1.264 | 0.0009442 |
| 10 | rs11599840 | 110614661 | XPNPEP1   | 999852 base upstream   | q25.1  | AG | 0.18   | 0.794 | 0.0009444 |
| 21 | rs1984023  | 40114073  | LOC150084 | 18180 base downstream  | q22.2  | AG | 0.3158 | 1.203 | 0.0009448 |

|    |            |           |           |                        |        |    |        |       |           |
|----|------------|-----------|-----------|------------------------|--------|----|--------|-------|-----------|
| 3  | rs820448   | 124830480 | MYLK      | intron 4               | q21.1  | CG | 0.8229 | 0.802 | 0.0009454 |
| 8  | rs13275153 | 109488103 | TTC35     | 36925 base upstream    | q23.1  | CT | 0.3534 | 1.197 | 0.0009459 |
| 3  | rs17623772 | 30361864  | TGFBR2    | 261133 base upstream   | p24.1  | CT | 0.6414 | 1.201 | 0.0009468 |
| 8  | rs4734174  | 109423278 | EIF3S6    | 93143 base downstream  | q23.1  | AG | 0.3543 | 1.197 | 0.0009471 |
| 2  | rs2100071  | 113541857 | IL1F10    | 160 base upstream      | q13    | AC | 0.6861 | 0.829 | 0.000948  |
| 12 | rs7959834  | 89968187  | KERA      | 214 base upstream      | q21.33 | CT | 0.0603 | 0.692 | 0.0009495 |
| 7  | rs2952763  | 52130392  | COBL      | 778402 base downstream | p12.1  | CT | 0.5363 | 0.842 | 0.0009497 |
| 12 | rs10845199 | 10711585  | STYK1     | intron 10              | p13.2  | CT | 0.3682 | 0.835 | 0.0009501 |
| 2  | rs12714260 | 29141728  | FLJ34931  | intron 1               | p23.2  | CG | 0.2517 | 1.23  | 0.0009504 |
| 7  | rs593517   | 125587676 | GRM8      | 278216 base upstream   | q31.33 | AC | 0.8773 | 1.305 | 0.0009508 |
| 12 | rs7973791  | 89968856  | KERA      | EXON 1                 | q21.33 | AC | 0.9397 | 1.445 | 0.0009509 |
| 3  | rs820450   | 124829191 | MYLK      | intron 4               | q21.1  | AT | 0.8229 | 0.802 | 0.000951  |
| 3  | rs12634878 | 30362570  | TGFBR2    | 260427 base upstream   | p24.1  | AG | 0.6415 | 1.201 | 0.0009512 |
| 12 | rs7312354  | 2204705   | CACNA1C   | intron 3               | p13.33 | CT | 0.0308 | 1.664 | 0.0009513 |
| 22 | rs3918439  | 33934502  | HMG2L1    | 48986 base upstream    | q12.3  | CG | 0.2738 | 0.824 | 0.0009515 |
| 2  | rs7599662  | 113541556 | IL1F10    | 461 base upstream      | q13    | CT | 0.686  | 0.829 | 0.0009516 |
| 9  | rs11138206 | 81234189  | CHCHD9    | 37419 base downstream  | q21.31 | AG | 0.0285 | 1.699 | 0.0009516 |
| 7  | rs917793   | 44212378  | YKT6      | intron 2               | p13    | AT | 0.8219 | 0.799 | 0.0009518 |
| 22 | rs5999766  | 33936111  | HMG2L1    | 47377 base upstream    | q12.3  | CT | 0.2738 | 0.824 | 0.000952  |
| 7  | rs639166   | 125564351 | GRM8      | 301541 base upstream   | q31.33 | CT | 0.8793 | 1.32  | 0.0009521 |
| 12 | rs10743918 | 10711189  | STYK1     | intron 10              | p13.2  | AC | 0.6319 | 1.197 | 0.0009524 |
| 6  | rs802251   | 124516266 | TCBA1     | intron 1               | q22.31 | GT | 0.1222 | 0.764 | 0.0009526 |
| 6  | rs13208606 | 41404395  | NCR2      | 7110 base upstream     | p21.1  | AG | 0.4474 | 0.84  | 0.0009527 |
| 1  | rs6682208  | 202832806 | LRRN5     | 20121 base upstream    | q32.1  | CT | 0.672  | 0.831 | 0.0009527 |
| 17 | rs1501259  | 47371272  | CA10      | intron 7               | q21.33 | AT | 0.9737 | 0.558 | 0.0009529 |
| 6  | rs4715472  | 54711017  | C6orf143  | 108510 base upstream   | p12.1  | AG | 0.1146 | 0.76  | 0.0009529 |
| 6  | rs802272   | 124523218 | TCBA1     | intron 1               | q22.31 | CT | 0.8771 | 1.303 | 0.0009535 |
| 22 | rs738440   | 33933022  | HMG2L1    | 50466 base upstream    | q12.3  | CT | 0.7262 | 1.213 | 0.0009543 |
| 3  | rs820451   | 124828079 | MYLK      | intron 3               | q21.1  | CT | 0.1772 | 1.247 | 0.0009547 |
| 6  | rs926924   | 14489412  | CD83      | 244287 base downstream | p23    | CT | 0.4587 | 1.187 | 0.0009548 |
| 2  | rs2433718  | 107969863 | SLC5A7    | intron 1               | q12.3  | AG | 0.1687 | 0.775 | 0.000955  |
| 2  | rs11125041 | 45962449  | PRKCE     | intron 2               | p21    | CT | 0.7799 | 1.236 | 0.0009559 |
| 5  | rs17708892 | 149554979 | SLC6A7    | intron 2               | q33.1  | AG | 0.0239 | 1.707 | 0.0009569 |
| 22 | rs7284380  | 33932582  | HMG2L1    | 50906 base upstream    | q12.3  | AG | 0.7262 | 1.212 | 0.0009578 |
| 12 | rs7296039  | 2205194   | CACNA1C   | intron 3               | p13.33 | CG | 0.0308 | 1.663 | 0.0009579 |
| 2  | rs13431763 | 45964078  | PRKCE     | intron 2               | p21    | AG | 0.2199 | 0.809 | 0.000958  |
| 21 | rs9305680  | 40106968  | LOC150084 | 11075 base downstream  | q22.2  | CG | 0.684  | 0.832 | 0.000958  |

|    |            |           |               |                        |        |    |        |       |           |
|----|------------|-----------|---------------|------------------------|--------|----|--------|-------|-----------|
| 6  | rs802252   | 124516294 | TCBA1         | intron 1               | q22.31 | CT | 0.1222 | 0.764 | 0.0009582 |
| 2  | rs1358578  | 51626897  | NRXN1         | 513719 base downstream | p16.3  | AG | 0.4251 | 1.19  | 0.0009592 |
| 2  | rs12620307 | 29141613  | FLJ34931      | intron 1               | p23.2  | AG | 0.7483 | 0.813 | 0.0009603 |
| 4  | rs9998916  | 175714448 | HPGD          | 34262 base downstream  | q34.1  | CG | 0.0882 | 0.717 | 0.0009622 |
| 9  | rs17082380 | 81234777  | CHCHD9        | 38007 base downstream  | q21.31 | AC | 0.9715 | 0.589 | 0.0009625 |
| 3  | rs552757   | 178791718 | TBL1XR1       | 393976 base downstream | q26.32 | AG | 0.374  | 0.833 | 0.000963  |
| 2  | rs4673461  | 209855352 | MAP2          | 141663 base upstream   | q34    | AG | 0.7784 | 0.81  | 0.0009631 |
| 1  | rs11240761 | 202833323 | LRRN5         | 19604 base upstream    | q32.1  | AC | 0.6721 | 0.831 | 0.0009633 |
| 22 | rs5999761  | 33929534  | HMG2L1        | 53954 base upstream    | q12.3  | CG | 0.7261 | 1.212 | 0.0009635 |
| 7  | rs526981   | 125587892 | GRM8          | 278000 base upstream   | q31.33 | CT | 0.8773 | 1.305 | 0.0009641 |
| 14 | rs12147244 | 39252820  | FBXO33        | 281449 base downstream | q21.1  | AG | 0.1005 | 1.327 | 0.0009643 |
| 6  | rs682747   | 117190566 | C6orf189      | intron 2               | q22.2  | AC | 0.5412 | 0.83  | 0.0009645 |
| 2  | rs2515404  | 113537588 | IL1F5         | EXON 5                 | q13    | CT | 0.3145 | 1.205 | 0.0009648 |
| 12 | rs2239031  | 2206430   | CACNA1C       | intron 3               | p13.33 | GT | 0.9692 | 0.601 | 0.0009658 |
| 5  | rs11743490 | 30094872  | CDH6          | 1134680 base upstream  | p13.3  | AG | 0.9107 | 0.735 | 0.0009666 |
| 3  | rs11129059 | 22438352  | ZNF659        | 670532 base downstream | p24.3  | AG | 0.162  | 1.266 | 0.0009675 |
| 12 | rs11067588 | 114340512 | THRAP2        | 540253 base upstream   | q24.21 | CG | 0.7659 | 1.235 | 0.0009679 |
| 20 | rs6053263  | 5222381   | PROKR2        | 8305 base upstream     | p12.3  | CG | 0.4914 | 1.191 | 0.0009681 |
| 7  | rs4947759  | 52985234  | DKFZp564N247z | 85608 base upstream    | p12.1  | AG | 0.8489 | 0.786 | 0.0009682 |
| 6  | rs603540   | 117190939 | C6orf189      | intron 2               | q22.2  | CT | 0.4589 | 1.204 | 0.0009686 |
| 2  | rs6726828  | 67716071  | ETAA16        | 225034 base downstream | p14    | GT | 0.3549 | 1.197 | 0.0009689 |
| 8  | rs13252623 | 12906017  | C8orf79       | intron 2               | p22    | GT | 0.9391 | 1.466 | 0.0009698 |
| 12 | rs2407653  | 87292097  | KITLG         | 118602 base upstream   | q21.32 | AC | 0.9221 | 0.73  | 0.0009699 |
| 10 | rs4542335  | 97076365  | SORBS1        | intron 3               | q23.33 | CG | 0.3026 | 1.207 | 0.0009704 |
| 22 | rs713969   | 33928993  | HMG2L1        | 54495 base upstream    | q12.3  | AC | 0.2739 | 0.826 | 0.0009717 |
| 5  | rs6887917  | 143534973 | KCTD16        | intron 2               | q32    | AG | 0.3554 | 1.199 | 0.0009741 |
| 22 | rs5746794  | 17963106  | CLDN5         | 70246 base downstream  | q11.21 | CG | 0.5322 | 0.833 | 0.0009741 |
| 12 | rs12228056 | 89954104  | KERA          | 14297 base upstream    | q21.33 | CT | 0.9397 | 1.444 | 0.0009743 |
| 13 | rs17215110 | 73018296  | KLF12         | 139854 base upstream   | q22.1  | AC | 0.8681 | 0.775 | 0.0009751 |
| 10 | rs11196072 | 114466456 | VTI1A         | intron 7               | q25.2  | CT | 0.0721 | 1.385 | 0.0009752 |
| 10 | rs7097972  | 22887793  | PIP4K2A       | intron 4               | p12.2  | CT | 0.406  | 0.839 | 0.0009759 |
| 18 | rs9949152  | 40396618  | SETBP1        | 138848 base upstream   | q12.3  | CT | 0.1898 | 1.262 | 0.0009763 |
| 7  | rs2953431  | 52155467  | COBL          | 803477 base downstream | p12.1  | AG | 0.4338 | 1.188 | 0.0009769 |
| 9  | rs10811336 | 20232344  | MLLT3         | 102623 base upstream   | p21.3  | AC | 0.8621 | 1.308 | 0.0009777 |
| 12 | rs12306540 | 114341431 | THRAP2        | 539334 base upstream   | q24.21 | AG | 0.7657 | 1.234 | 0.0009784 |
| 1  | rs11240764 | 202835999 | LRRN5         | 16928 base upstream    | q32.1  | CT | 0.6721 | 0.832 | 0.0009796 |
| 1  | rs6594019  | 202835233 | LRRN5         | 17694 base upstream    | q32.1  | CT | 0.6721 | 0.832 | 0.0009797 |



|    |            |           |          |                        |        |    |        |       |           |
|----|------------|-----------|----------|------------------------|--------|----|--------|-------|-----------|
| 1  | rs6594018  | 202834775 | LRRN5    | 18152 base upstream    | q32.1  | AG | 0.3279 | 1.202 | 0.0009798 |
| 7  | rs2465796  | 52158227  | COBL     | 806237 base downstream | p12.1  | CT | 0.4338 | 1.188 | 0.0009806 |
| 12 | rs10745478 | 87270942  | KITLG    | 139757 base upstream   | q21.32 | GT | 0.9275 | 0.718 | 0.0009809 |
| 16 | rs7199694  | 6606821   | A2BP1    | intron 2               | p13.2  | AG | 0.5118 | 0.839 | 0.0009816 |
| 6  | rs802270   | 124522342 | TCBA1    | intron 1               | q22.31 | AG | 0.877  | 1.301 | 0.0009818 |
| 12 | rs2111038  | 87296649  | KITLG    | 114050 base upstream   | q21.32 | CT | 0.076  | 1.382 | 0.0009824 |
| 7  | rs2908282  | 44215353  | YKT6     | intron 5               | p13    | AG | 0.1781 | 1.251 | 0.0009831 |
| 9  | rs10817727 | 117019231 | 1-Dec    | intron 1               | q33.1  | AG | 0.8927 | 0.753 | 0.0009833 |
| 6  | rs10872698 | 153444170 | RGS17    | intron 4               | q25.2  | AG | 0.5861 | 0.841 | 0.0009839 |
| 3  | rs4679546  | 59364649  | FHIT     | 345428 base upstream   | p14.2  | AC | 0.2011 | 1.236 | 0.0009839 |
| 6  | rs802253   | 124516437 | TCBA1    | intron 1               | q22.31 | CG | 0.1221 | 0.765 | 0.0009848 |
| 6  | rs9479502  | 153444391 | RGS17    | intron 4               | q25.2  | CT | 0.4139 | 1.19  | 0.0009854 |
| 6  | rs693602   | 117192477 | C6orf189 | intron 2               | q22.2  | AC | 0.5411 | 0.832 | 0.0009855 |
| 18 | rs9947555  | 6396648   | L3MBTL4  | intron 19              | p11.31 | CT | 0.3159 | 0.822 | 0.000986  |
| 13 | rs9511023  | 23529796  | SPATA13  | 103090 base upstream   | q12.12 | AG | 0.2386 | 1.227 | 0.0009865 |
| 15 | rs12915677 | 46652089  | FBN1     | intron 60              | q21.1  | CT | 0.7983 | 0.812 | 0.0009868 |
| 8  | rs11136435 | 1779092   | ARHGEF10 | intron 2               | p23.3  | AG | 0.5032 | 1.189 | 0.000987  |
| 6  | rs802255   | 124517096 | TCBA1    | intron 1               | q22.31 | AG | 0.1221 | 0.765 | 0.0009871 |
| 16 | rs154537   | 22620480  | HS3ST2   | 112880 base upstream   | p12.1  | GT | 0.8262 | 1.267 | 0.0009872 |
| 6  | rs9478386  | 153444523 | RGS17    | intron 4               | q25.2  | AG | 0.4139 | 1.19  | 0.0009877 |
| 8  | rs2385523  | 127250276 | FAM84B   | 383592 base upstream   | q24.13 | AC | 0.7564 | 0.81  | 0.0009878 |
| 2  | rs312052   | 21281690  | APOB     | 161240 base downstream | p24.1  | AG | 0.7613 | 0.81  | 0.0009883 |
| 12 | rs10745479 | 87291483  | KITLG    | 119216 base upstream   | q21.32 | AG | 0.9221 | 0.73  | 0.000989  |
| 3  | rs977305   | 30365684  | TGFBR2   | 257313 base upstream   | p24.1  | AG | 0.6416 | 1.2   | 0.0009897 |
| 2  | rs6732490  | 67714314  | ETAA16   | 223277 base downstream | p14    | AC | 0.6451 | 0.836 | 0.0009898 |
| 7  | rs3815412  | 115977929 | CAV1     | intron 2               | q31.2  | CT | 0.2498 | 1.21  | 0.0009901 |
| 5  | rs4867706  | 172714540 | STC2     | 25428 base downstream  | q35.2  | AG | 0.7144 | 1.232 | 0.0009901 |
| 10 | rs11597369 | 110493441 | XPNPEP1  | 1121072 base upstream  | q25.1  | AC | 0.8235 | 1.263 | 0.0009903 |
| 6  | rs10872697 | 153442739 | RGS17    | intron 4               | q25.2  | GT | 0.5862 | 0.841 | 0.0009905 |
| 10 | rs4748813  | 22886741  | PIP4K2A  | intron 4               | p12.2  | CT | 0.592  | 1.191 | 0.0009906 |
| 10 | rs11194334 | 110747675 | XPNPEP1  | 866838 base upstream   | q25.1  | AC | 0.1621 | 0.778 | 0.0009907 |
| 20 | rs4346455  | 10827336  | JAG1     | 224642 base downstream | p12.2  | CT | 0.4354 | 0.842 | 0.0009908 |
| 12 | rs4842604  | 87297081  | KITLG    | 113618 base upstream   | q21.32 | CT | 0.0759 | 1.383 | 0.0009925 |
| 15 | rs2940333  | 60544836  | TLN2     | 181965 base upstream   | q22.2  | AG | 0.2166 | 0.804 | 0.0009931 |
| 2  | rs6760893  | 67713993  | ETAA16   | 222956 base downstream | p14    | AG | 0.3549 | 1.196 | 0.0009942 |
| 7  | rs1524344  | 146317484 | CNTNAP2  | intron 3               | q35    | CG | 0.0907 | 1.35  | 0.0009955 |
| 1  | rs12409699 | 55456607  | USP24    | 3257 base downstream   | p32.3  | AG | 0.763  | 0.813 | 0.0009956 |

|    |            |           |          |                         |        |    |        |       |           |
|----|------------|-----------|----------|-------------------------|--------|----|--------|-------|-----------|
| 10 | rs6583997  | 97117254  | SORBS1   | intron 11               | q23.33 | CT | 0.7163 | 0.826 | 0.0009957 |
| 2  | rs17033996 | 67713787  | ETAA16   | 222750 base downstream  | p14    | AG | 0.6451 | 0.836 | 0.0009961 |
| 21 | rs17210470 | 17222789  | C21orf34 | 321376 base downstream  | q21.1  | CT | 0.2791 | 1.222 | 0.0009962 |
| 5  | rs12513560 | 104050721 | NUDT12   | 1124332 base downstream | q21.2  | CT | 0.8305 | 0.795 | 0.0009971 |
| 2  | rs6752290  | 209868043 | MAP2     | 128972 base upstream    | q34    | CT | 0.2211 | 1.233 | 0.0009972 |
| 6  | rs9479499  | 153441972 | RGS17    | intron 4                | q25.2  | AT | 0.5862 | 0.841 | 0.0009973 |
| 10 | rs7920198  | 110537793 | XPNPEP1  | 1076720 base upstream   | q25.1  | AG | 0.8171 | 1.259 | 0.0009975 |
| 4  | rs2877818  | 175712054 | HPGD     | 31868 base downstream   | q34.1  | CT | 0.9117 | 1.386 | 0.0009977 |
| 10 | rs3006662  | 32469248  | KIF5B    | 84027 base downstream   | p11.22 | AC | 0.0367 | 1.58  | 0.0009978 |
| 4  | rs10019035 | 175713571 | HPGD     | 33385 base downstream   | q34.1  | CT | 0.9117 | 1.387 | 0.0009987 |
| 12 | rs10745477 | 87265181  | KITLG    | 145518 base upstream    | q21.32 | GT | 0.919  | 0.729 | 0.0009989 |
| 10 | rs7084853  | 85956301  | PCDH21   | intron 10               | q23.1  | AG | 0.7556 | 1.224 | 0.0009989 |
| 1  | rs12063029 | 55481326  | USP24    | 27976 base downstream   | p32.3  | AG | 0.2422 | 1.23  | 0.0009989 |
| 21 | rs17666683 | 32310264  | HUNK     | 12017 base downstream   | q22.11 | GT | 0.8553 | 1.284 | 0.0009996 |
| 8  | rs13281642 | 12887282  | C8orf79  | intron 1                | p22    | AT | 0.9382 | 1.456 | 0.001     |
| 10 | rs2998089  | 32470365  | KIF5B    | 85144 base downstream   | p11.22 | GT | 0.9633 | 0.633 | 0.001     |
