# Supplementary material for: Genome-Wide Association Study of Suicide Attempts in Mood Disorder Patients
Source: Atypon-hosted journal article supplement (doi:10.1176/appi.ajp.2010.10040541), 2010-11-02
Supplement: ajp_167_12_1499_07.pdf [file ajp_167_12_1499_07.pdf]

| CHR | SNP        | POS       | GENE   | DISTANCE              | BAND  | A1/A2 | A1 freq | OR    | P        |
|-----|------------|-----------|--------|-----------------------|-------|-------|---------|-------|----------|
| 3   | rs2576377  | 102130439 | ABI3BP | intron 34             | q12.2 | CT    | 0.1657  | 2.307 | 2.55E-08 |
| 3   | rs13072000 | 102108512 | ABI3BP | intron 33             | q12.2 | AG    | 0.8508  | 0.439 | 6.56E-08 |
| 3   | rs13079002 | 102112831 | ABI3BP | intron 33             | q12.2 | CT    | 0.8509  | 0.438 | 6.47E-08 |
| 3   | rs2713782  | 102111994 | ABI3BP | intron 33             | q12.2 | AG    | 0.8508  | 0.439 | 6.56E-08 |
| 3   | rs4060963  | 102107251 | ABI3BP | intron 33             | q12.2 | AG    | 0.1495  | 2.272 | 7.06E-08 |
| 3   | rs2713787  | 102107128 | ABI3BP | intron 33             | q12.2 | CG    | 0.8505  | 0.44  | 7.05E-08 |
| 3   | rs9832195  | 102105082 | ABI3BP | intron 33             | q12.2 | AC    | 0.1495  | 2.271 | 7.05E-08 |
| 3   | rs2576365  | 102104116 | ABI3BP | intron 32             | q12.2 | AC    | 0.8505  | 0.44  | 7.05E-08 |
| 3   | rs4928096  | 102102450 | ABI3BP | intron 32             | q12.2 | AG    | 0.8505  | 0.44  | 7.05E-08 |
| 3   | rs2713793  | 102101864 | ABI3BP | intron 32             | q12.2 | AG    | 0.1495  | 2.27  | 7.77E-08 |
| 3   | rs2245266  | 102101463 | ABI3BP | intron 32             | q12.2 | CT    | 0.8506  | 0.441 | 7.88E-08 |
| 3   | rs2576369  | 102100845 | ABI3BP | intron 32             | q12.2 | AG    | 0.8506  | 0.441 | 7.93E-08 |
| 3   | rs7431835  | 102125413 | ABI3BP | intron 33             | q12.2 | AT    | 0.15    | 2.264 | 8.56E-08 |
| 3   | rs1036467  | 102125494 | ABI3BP | intron 33             | q12.2 | CT    | 0.85    | 0.442 | 8.58E-08 |
| 3   | rs17284842 | 102127637 | ABI3BP | intron 33             | q12.2 | CT    | 0.15    | 2.262 | 8.74E-08 |
| 3   | rs2245473  | 102098826 | ABI3BP | intron 31             | q12.2 | AG    | 0.8506  | 0.441 | 8.21E-08 |
| 3   | rs13060137 | 102130617 | ABI3BP | intron 34             | q12.2 | AG    | 0.8501  | 0.442 | 8.96E-08 |
| 3   | rs13077353 | 102132997 | ABI3BP | intron 34             | q12.2 | GT    | 0.1499  | 2.26  | 9.04E-08 |
| 3   | rs2245556  | 102098240 | ABI3BP | intron 31             | q12.2 | CT    | 0.8506  | 0.441 | 8.31E-08 |
| 3   | rs2576382  | 102150519 | ABI3BP | intron 34             | q12.2 | AT    | 0.8502  | 0.445 | 1.10E-07 |
| 3   | rs2595894  | 102160572 | ABI3BP | intron 34             | q12.2 | CG    | 0.8506  | 0.452 | 1.54E-07 |
| 3   | rs10511181 | 102172552 | ABI3BP | intron 34             | q12.2 | GT    | 0.1493  | 2.211 | 1.53E-07 |
| 3   | rs2576391  | 102159700 | ABI3BP | intron 34             | q12.2 | CG    | 0.1494  | 2.211 | 1.56E-07 |
| 3   | rs17398684 | 102178032 | ABI3BP | intron 34             | q12.2 | AG    | 0.1493  | 2.21  | 1.53E-07 |
| 3   | rs13088524 | 102170772 | ABI3BP | intron 34             | q12.2 | AC    | 0.8507  | 0.452 | 1.53E-07 |
| 3   | rs17398421 | 102155597 | ABI3BP | intron 34             | q12.2 | GT    | 0.1494  | 2.211 | 1.56E-07 |
| 3   | rs2595893  | 102160532 | ABI3BP | intron 34             | q12.2 | CT    | 0.1494  | 2.211 | 1.55E-07 |
| 3   | rs13074729 | 102248274 | ABI3BP | 53270 base downstream | q12.2 | GT    | 0.8522  | 0.457 | 2.64E-07 |
| 3   | rs17399603 | 102218829 | ABI3BP | 23825 base downstream | q12.2 | AG    | 0.8513  | 0.461 | 2.71E-07 |
| 3   | rs13099753 | 102252014 | ABI3BP | 57010 base downstream | q12.2 | CG    | 0.8138  | 0.483 | 4.19E-07 |
| 3   | rs16843216 | 102279569 | ABI3BP | 84565 base downstream | q12.2 | CT    | 0.8646  | 0.462 | 8.54E-07 |
| 3   | rs1375513  | 102253981 | ABI3BP | 58977 base downstream | q12.2 | GT    | 0.1886  | 2.031 | 1.13E-06 |
| 3   | rs16843229 | 102284910 | ABI3BP | 89906 base downstream | q12.2 | AG    | 0.1333  | 2.211 | 7.44E-07 |
| 3   | rs13081830 | 102273952 | ABI3BP | 78948 base downstream | q12.2 | AG    | 0.1353  | 2.159 | 9.15E-07 |
| 3   | rs16843225 | 102283947 | ABI3BP | 88943 base downstream | q12.2 | GT    | 0.1355  | 2.17  | 7.81E-07 |
| 3   | rs17219986 | 102282360 | ABI3BP | 87356 base downstream | q12.2 | AG    | 0.1354  | 2.168 | 8.03E-07 |

|    |            |           |           |                       |        |    |        |       |           |
|----|------------|-----------|-----------|-----------------------|--------|----|--------|-------|-----------|
| 2  | rs13390174 | 5606908   | SOX11     | 143341 base upstream  | p25.2  | CT | 0.5146 | 0.639 | 0.0002307 |
| 2  | rs10929647 | 5605816   | SOX11     | 144433 base upstream  | p25.2  | AC | 0.515  | 0.638 | 0.0002297 |
| 3  | rs13060849 | 102256173 | ABI3BP    | 61169 base downstream | q12.2  | AC | 0.8649 | 0.472 | 1.85E-06  |
| 2  | rs2882274  | 5606432   | SOX11     | 143817 base upstream  | p25.2  | CT | 0.5149 | 0.638 | 0.0002304 |
| 3  | rs13065684 | 102256428 | ABI3BP    | 61424 base downstream | q12.2  | CT | 0.1351 | 2.12  | 1.81E-06  |
| 3  | rs16843198 | 102265765 | ABI3BP    | 70761 base downstream | q12.2  | GT | 0.8649 | 0.47  | 1.66E-06  |
| 3  | rs10511182 | 102255525 | ABI3BP    | 60521 base downstream | q12.2  | CG | 0.8649 | 0.473 | 1.93E-06  |
| 3  | rs13096071 | 102284333 | ABI3BP    | 89329 base downstream | q12.2  | CT | 0.0826 | 1.899 | 0.0004443 |
| 4  | rs2602098  | 72354319  | SLC4A4    | intron 3              | q13.3  | GT | 0.2061 | 1.96  | 8.80E-07  |
| 21 | rs2245338  | 29929217  | GRIK1     | intron 9              | q21.3  | CT | 0.8804 | 0.552 | 0.0002493 |
| 18 | rs1785416  | 5589104   | EPB41L3   | 55118 base downstream | p11.31 | CT | 0.4914 | 0.658 | 0.0004779 |
| 20 | rs6039433  | 927720    | RSPO4     | intron 4              | p13    | CT | 0.1326 | 1.73  | 0.0004918 |
| 18 | rs1785414  | 5587676   | EPB41L3   | 53690 base downstream | p11.31 | GT | 0.4954 | 0.66  | 0.0005065 |
| 18 | rs2703167  | 37290341  | PIK3C3    | 498855 base upstream  | q12.3  | AC | 0.1075 | 0.404 | 0.0008151 |
| 18 | rs1539811  | 5585958   | EPB41L3   | 51972 base downstream | p11.31 | CT | 0.5134 | 1.56  | 0.0004098 |
| 18 | rs1719983  | 5586822   | EPB41L3   | 52836 base downstream | p11.31 | CT | 0.5086 | 1.513 | 0.000484  |
| 18 | rs1785413  | 5586929   | EPB41L3   | 52943 base downstream | p11.31 | AG | 0.5086 | 1.513 | 0.0004847 |
| 20 | rs6100397  | 57284330  | C20orf174 | 16768 base downstream | q13.32 | GT | 0.034  | 2.455 | 0.0006701 |
| 18 | rs1785415  | 5588976   | EPB41L3   | 54990 base downstream | p11.31 | AG | 0.4915 | 0.661 | 0.0004889 |
| 18 | rs1785410  | 5584917   | EPB41L3   | 50931 base downstream | p11.31 | CT | 0.5088 | 1.514 | 0.000481  |
| 5  | rs11958887 | 178229183 | ZNF354B   | intron 4              | q35.3  | CT | 0.8809 | 0.574 | 0.0005138 |
| 5  | rs6870926  | 178232797 | ZNF354B   | intron 4              | q35.3  | CT | 0.1193 | 1.732 | 0.0005319 |
| 18 | rs1539812  | 5586091   | EPB41L3   | 52105 base downstream | p11.31 | CT | 0.4913 | 0.661 | 0.0004821 |
| 18 | rs1719944  | 5586603   | EPB41L3   | 52617 base downstream | p11.31 | CT | 0.4913 | 0.661 | 0.0004824 |
| 5  | rs6883566  | 178239195 | ZNF354B   | intron 4              | q35.3  | AG | 0.8806 | 0.578 | 0.0005466 |
| 18 | rs948271   | 13793024  | MC5R      | 22740 base upstream   | p11.21 | CT | 0.0999 | 1.8   | 0.0009326 |
| 5  | rs6862829  | 178239194 | ZNF354B   | intron 4              | q35.3  | CT | 0.8806 | 0.578 | 0.0005452 |
| 5  | rs11949180 | 178229142 | ZNF354B   | intron 4              | q35.3  | AG | 0.881  | 0.573 | 0.000511  |
| 5  | rs11954382 | 178253452 | ZFP2      | 2069 base upstream    | q35.3  | CT | 0.8805 | 0.58  | 0.0005934 |
| 5  | rs6894878  | 178244599 | ZNF354B   | 578 base downstream   | q35.3  | AG | 0.1194 | 1.73  | 0.0005491 |
| 5  | rs11949892 | 178229129 | ZNF354B   | intron 4              | q35.3  | CT | 0.1189 | 1.745 | 0.0005082 |
| 15 | rs17303111 | 58797094  | RORA      | intron 10             | q22.2  | CT | 0.2566 | 0.566 | 0.0001731 |
| 5  | rs11948175 | 178227589 | ZNF354B   | intron 4              | q35.3  | AC | 0.8811 | 0.572 | 0.0005041 |
| 18 | rs9949908  | 13790956  | MC5R      | 24808 base upstream   | p11.21 | GT | 0.8999 | 0.556 | 0.0009336 |
| 5  | rs6895371  | 178257390 | ZFP2      | intron 1              | q35.3  | CT | 0.8805 | 0.58  | 0.0005966 |
| 18 | rs1785427  | 5569427   | EPB41L3   | 35441 base downstream | p11.31 | AG | 0.5105 | 1.501 | 0.0005511 |
| 8  | rs971555   | 4095738   | CSMD1     | intron 67             | p23.2  | AG | 0.9399 | 0.403 | 1.93E-05  |

|    |            |           |          |                       |        |    |        |       |           |
|----|------------|-----------|----------|-----------------------|--------|----|--------|-------|-----------|
| 8  | rs6998882  | 4095458   | CSMD1    | intron 67             | p23.2  | AC | 0.9399 | 0.403 | 1.93E-05  |
| 3  | rs7621961  | 18374868  | SATB1    | intron 2              | p24.3  | AG | 0.0375 | 2.802 | 2.83E-05  |
| 18 | rs1719939  | 5582779   | EPB41L3  | 48793 base downstream | p11.31 | CT | 0.4911 | 0.66  | 0.0004796 |
| 5  | rs11958941 | 178229382 | ZNF354B  | intron 4              | q35.3  | CT | 0.8809 | 0.575 | 0.0005155 |
| 15 | rs2414680  | 58798563  | RORA     | intron 10             | q22.2  | AG | 0.7428 | 1.817 | 0.0001427 |
| 18 | rs1719933  | 5570911   | EPB41L3  | 36925 base downstream | p11.31 | CT | 0.4896 | 0.666 | 0.0005461 |
| 5  | rs11948690 | 178226479 | ZNF354B  | intron 3              | q35.3  | CG | 0.8812 | 0.571 | 0.000499  |
| 11 | rs17141842 | 80656128  | MGC33846 | 1464570 base upstream | q14.1  | CT | 0.9459 | 0.441 | 5.14E-05  |
| 2  | rs6752812  | 172559748 | HAT1     | 2903 base downstream  | q31.1  | AC | 0.3181 | 1.513 | 0.0007443 |
| 2  | rs6737169  | 38431205  | ARL6IP2  | intron 12             | p22.1  | CT | 0.2691 | 0.515 | 8.86E-06  |
| 18 | rs1785407  | 5584350   | EPB41L3  | 50364 base downstream | p11.31 | AG | 0.5089 | 1.514 | 0.0004798 |
| 18 | rs1785408  | 5584648   | EPB41L3  | 50662 base downstream | p11.31 | AG | 0.5089 | 1.514 | 0.0004804 |
| 18 | rs1719943  | 5584667   | EPB41L3  | 50681 base downstream | p11.31 | CT | 0.5088 | 1.514 | 0.0004798 |
| 18 | rs1785409  | 5584739   | EPB41L3  | 50753 base downstream | p11.31 | CT | 0.4912 | 0.661 | 0.0004805 |
| 3  | rs11927883 | 18376571  | SATB1    | intron 2              | p24.3  | AG | 0.9627 | 0.357 | 2.71E-05  |
| 3  | rs3922895  | 18377595  | SATB1    | intron 2              | p24.3  | AT | 0.0372 | 2.79  | 2.68E-05  |
| 8  | rs1504769  | 4089356   | CSMD1    | intron 67             | p23.2  | CT | 0.957  | 0.382 | 3.28E-05  |
| 2  | rs10198323 | 38424759  | ARL6IP2  | intron 12             | p22.1  | CT | 0.2694 | 0.515 | 8.87E-06  |
| 2  | rs6716350  | 38439578  | ARL6IP2  | intron 12             | p22.1  | CT | 0.7256 | 1.928 | 8.99E-06  |
| 8  | rs2407941  | 4097308   | CSMD1    | intron 67             | p23.2  | CT | 0.0675 | 2.305 | 2.92E-05  |
| 4  | rs3907208  | 72328528  | SLC4A4   | intron 2              | q13.3  | AT | 0.1334 | 1.936 | 5.75E-06  |
| 4  | rs12506660 | 72327457  | SLC4A4   | intron 2              | q13.3  | CT | 0.1335 | 1.935 | 5.84E-06  |
| 18 | rs1719985  | 5588554   | EPB41L3  | 54568 base downstream | p11.31 | CT | 0.5199 | 1.506 | 0.0005406 |
| 4  | rs2045012  | 72332316  | SLC4A4   | intron 2              | q13.3  | GT | 0.1332 | 1.939 | 5.42E-06  |
| 1  | rs6719     | 152446303 | C1orf43  | EXON 1                | q21.3  | CT | 0.4442 | 0.606 | 3.95E-05  |
| 4  | rs9790757  | 72333961  | SLC4A4   | intron 2              | q13.3  | CT | 0.1166 | 2.013 | 5.02E-06  |
| 8  | rs7838274  | 4089879   | CSMD1    | intron 67             | p23.2  | AT | 0.9573 | 0.381 | 2.98E-05  |
| 11 | rs10891069 | 109525001 | ZC3H12C  | intron 2              | q22.3  | CT | 0.757  | 0.605 | 9.13E-05  |
| 1  | rs2340473  | 152491968 | UBAP2L   | intron 13             | q21.3  | CT | 0.4444 | 0.608 | 4.03E-05  |
| 1  | rs2879788  | 152470934 | UBAP2L   | intron 3              | q21.3  | AT | 0.5562 | 1.644 | 4.19E-05  |
| 1  | rs6427509  | 152486342 | UBAP2L   | intron 10             | q21.3  | CT | 0.5557 | 1.644 | 4.03E-05  |
| 1  | rs10158820 | 152484387 | UBAP2L   | intron 9              | q21.3  | CT | 0.5558 | 1.644 | 4.05E-05  |
| 2  | rs11687878 | 38443251  | ARL6IP2  | intron 12             | p22.1  | GT | 0.7624 | 1.925 | 2.92E-05  |
| 1  | rs12062977 | 152478140 | UBAP2L   | intron 7              | q21.3  | CT | 0.5558 | 1.644 | 4.06E-05  |
| 2  | rs11900967 | 38441642  | ARL6IP2  | intron 12             | p22.1  | AT | 0.2378 | 0.519 | 2.91E-05  |
| 1  | rs9803857  | 152458415 | C1orf43  | intron 4              | q21.3  | AG | 0.4436 | 0.609 | 4.30E-05  |
| 4  | rs7655668  | 72311240  | SLC4A4   | intron 1              | q13.3  | CG | 0.8876 | 0.476 | 4.17E-06  |

|    |            |           |         |                        |        |    |        |       |           |
|----|------------|-----------|---------|------------------------|--------|----|--------|-------|-----------|
| 2  | rs11687138 | 38427194  | ARL6IP2 | intron 12              | p22.1  | AG | 0.2395 | 0.519 | 2.87E-05  |
| 11 | rs10891068 | 109524916 | ZC3H12C | intron 2               | q22.3  | AG | 0.2419 | 1.65  | 9.77E-05  |
| 4  | rs1563045  | 72334532  | SLC4A4  | intron 2               | q13.3  | CT | 0.8681 | 0.52  | 8.13E-06  |
| 1  | rs10493528 | 74185240  | LRRC44  | 79049 base upstream    | p31.1  | AT | 0.3731 | 1.726 | 3.52E-06  |
| 7  | rs10238136 | 6389871   | RAC1    | intron 1               | p22.1  | AT | 0.9655 | 0.396 | 0.0002442 |
| 1  | rs7544238  | 74191995  | LRRC44  | 72294 base upstream    | p31.1  | AC | 0.3737 | 1.732 | 3.18E-06  |
| 1  | rs1417259  | 74191025  | LRRC44  | 73264 base upstream    | p31.1  | GT | 0.3737 | 1.732 | 3.17E-06  |
| 4  | rs1319630  | 72334992  | SLC4A4  | intron 2               | q13.3  | CT | 0.1319 | 1.923 | 8.14E-06  |
| 4  | rs7689609  | 72302238  | SLC4A4  | intron 1               | q13.3  | CT | 0.128  | 1.976 | 8.69E-06  |
| 1  | rs12081389 | 74168149  | LRRC44  | 96140 base upstream    | p31.1  | AT | 0.3735 | 1.72  | 4.19E-06  |
| 4  | rs2060903  | 72336555  | SLC4A4  | intron 2               | q13.3  | AG | 0.8686 | 0.521 | 9.41E-06  |
| 1  | rs7533599  | 74165700  | LRRC44  | 98589 base upstream    | p31.1  | AG | 0.3735 | 1.72  | 4.21E-06  |
| 1  | rs11210377 | 74195971  | LRRC44  | 68318 base upstream    | p31.1  | GT | 0.6255 | 0.579 | 3.43E-06  |
| 1  | rs12116914 | 74196206  | LRRC44  | 68083 base upstream    | p31.1  | GT | 0.3745 | 1.727 | 3.44E-06  |
| 1  | rs12082647 | 74170715  | LRRC44  | 93574 base upstream    | p31.1  | AC | 0.6276 | 0.58  | 3.52E-06  |
| 1  | rs11210368 | 74153059  | LRRC44  | 111230 base upstream   | p31.1  | AG | 0.3741 | 1.718 | 4.60E-06  |
| 1  | rs12062996 | 74150383  | LRRC44  | 113906 base upstream   | p31.1  | CT | 0.3742 | 1.717 | 4.66E-06  |
| 1  | rs7550937  | 74151900  | LRRC44  | 112389 base upstream   | p31.1  | AG | 0.3741 | 1.718 | 4.63E-06  |
| 2  | rs10202823 | 172488378 | HAT1    | intron 1               | q31.1  | CT | 0.3177 | 1.516 | 0.0007101 |
| 1  | rs1768649  | 74152537  | LRRC44  | 111752 base upstream   | p31.1  | AG | 0.3741 | 1.718 | 4.62E-06  |
| 18 | rs1785382  | 5580926   | EPB41L3 | 46940 base downstream  | p11.31 | CT | 0.5204 | 1.512 | 0.0005066 |
| 2  | rs6727017  | 172475093 | HAT1    | 12110 base upstream    | q31.1  | AT | 0.3129 | 1.511 | 0.0009258 |
| 1  | rs7544252  | 74149450  | LRRC44  | 114839 base upstream   | p31.1  | CG | 0.3742 | 1.717 | 4.69E-06  |
| 18 | rs1719934  | 5575158   | EPB41L3 | 41172 base downstream  | p11.31 | AG | 0.5376 | 1.529 | 0.0007239 |
| 18 | rs1785378  | 5577094   | EPB41L3 | 43108 base downstream  | p11.31 | AG | 0.4626 | 0.654 | 0.0007177 |
| 18 | rs1785418  | 5591403   | EPB41L3 | 57417 base downstream  | p11.31 | AG | 0.4836 | 0.656 | 0.0005431 |
| 1  | rs2733260  | 74159865  | LRRC44  | 104424 base upstream   | p31.1  | CT | 0.626  | 0.582 | 4.53E-06  |
| 5  | rs11950641 | 178229512 | ZNF354B | intron 4               | q35.3  | CT | 0.1224 | 1.73  | 0.00079   |
| 1  | rs6600426  | 38656605  | POU3F1  | 371568 base downstream | p34.3  | AG | 0.1744 | 1.623 | 0.0006588 |
| 1  | rs12064998 | 74202690  | LRRC44  | 61599 base upstream    | p31.1  | AG | 0.6253 | 0.579 | 3.51E-06  |
| 1  | rs12064944 | 74202532  | LRRC44  | 61757 base upstream    | p31.1  | AG | 0.6254 | 0.579 | 3.48E-06  |
| 5  | rs6865216  | 178252143 | ZFP2    | 3378 base upstream     | q35.3  | AG | 0.1304 | 1.803 | 0.0004031 |
| 4  | rs10470737 | 72337409  | SLC4A4  | intron 2               | q13.3  | AG | 0.8688 | 0.522 | 1.03E-05  |
| 18 | rs1785381  | 5579721   | EPB41L3 | 45735 base downstream  | p11.31 | CT | 0.5257 | 1.545 | 0.0007352 |
| 5  | rs32972    | 115858991 | SEMA6A  | intron 13              | q23.1  | CT | 0.5146 | 1.704 | 2.13E-05  |
| 18 | rs1719937  | 5577607   | EPB41L3 | 43621 base downstream  | p11.31 | AG | 0.5298 | 1.542 | 0.000701  |
| 7  | rs10234438 | 6389325   | RAC1    | intron 1               | p22.1  | AG | 0.9655 | 0.397 | 0.0002445 |

|    |            |           |          |                         |        |    |        |       |           |
|----|------------|-----------|----------|-------------------------|--------|----|--------|-------|-----------|
| 8  | rs12675002 | 4101682   | CSMD1    | intron 67               | p23.2  | AG | 0.0676 | 2.204 | 5.40E-05  |
| 4  | rs17051173 | 132424433 | PCDH10   | 1865486 base upstream   | q28.3  | CT | 0.0285 | 2.816 | 0.0001177 |
| 2  | rs312924   | 172272267 | DYNC1I2  | intron 5                | q31.1  | AT | 0.7163 | 0.637 | 0.0002489 |
| 10 | rs6482660  | 129849048 | MKI67    | 34403 base downstream   | q26.2  | AG | 0.3201 | 1.6   | 0.0001477 |
| 4  | rs2861393  | 132426397 | PCDH10   | 1863522 base upstream   | q28.3  | AG | 0.0285 | 2.816 | 0.0001172 |
| 4  | rs11941498 | 132422269 | PCDH10   | 1867650 base upstream   | q28.3  | CT | 0.0287 | 2.811 | 0.0001245 |
| 18 | rs1785380  | 5579629   | EPB41L3  | 45643 base downstream   | p11.31 | AC | 0.5221 | 1.528 | 0.0008792 |
| 11 | rs12362273 | 109527367 | ZC3H12C  | intron 2                | q22.3  | AC | 0.7582 | 0.606 | 9.89E-05  |
| 1  | rs1340434  | 74138234  | LRRC44   | 126055 base upstream    | p31.1  | CT | 0.3745 | 1.715 | 4.97E-06  |
| 1  | rs1361463  | 74194799  | LRRC44   | 69490 base upstream     | p31.1  | AT | 0.3744 | 1.728 | 3.41E-06  |
| 4  | rs2861394  | 132429544 | PCDH10   | 1860375 base upstream   | q28.3  | AG | 0.0285 | 2.817 | 0.0001165 |
| 1  | rs12138557 | 74215111  | LRRC44   | 49178 base upstream     | p31.1  | AC | 0.3751 | 1.724 | 3.71E-06  |
| 1  | rs10890094 | 74175476  | LRRC44   | 88813 base upstream     | p31.1  | AG | 0.6273 | 0.58  | 3.51E-06  |
| 13 | rs9597010  | 54051478  | OLFM4    | 1527291 base downstream | q21.1  | AT | 0.1705 | 0.473 | 0.0002237 |
| 1  | rs10890093 | 74175413  | LRRC44   | 88876 base upstream     | p31.1  | GT | 0.6274 | 0.58  | 3.51E-06  |
| 7  | rs1541363  | 24845137  | OSBPL3   | intron 9                | p15.3  | CT | 0.8888 | 2.302 | 0.0008451 |
| 4  | rs10006868 | 132421378 | PCDH10   | 1868541 base upstream   | q28.3  | CG | 0.9707 | 0.358 | 0.00015   |
| 7  | rs2286192  | 84542645  | SEMA3D   | intron 14               | q21.11 | CT | 0.1324 | 1.846 | 0.0001791 |
| 2  | rs11884107 | 38418894  | ARL6IP2  | intron 11               | p22.1  | CT | 0.7517 | 1.878 | 3.75E-05  |
| 7  | rs6957484  | 84540088  | SEMA3D   | intron 13               | q21.11 | GT | 0.8682 | 0.544 | 0.0001835 |
| 7  | rs6966472  | 84537323  | SEMA3D   | intron 13               | q21.11 | CT | 0.1316 | 1.834 | 0.0001854 |
| 7  | rs16887821 | 84534250  | SEMA3D   | intron 12               | q21.11 | CG | 0.1315 | 1.831 | 0.0001874 |
| 4  | rs17051172 | 132412892 | PCDH10   | 1877027 base upstream   | q28.3  | CT | 0.0294 | 2.786 | 0.0001558 |
| 4  | rs17051170 | 132412751 | PCDH10   | 1877168 base upstream   | q28.3  | AC | 0.0295 | 2.784 | 0.000161  |
| 1  | rs11210383 | 74208096  | LRRC44   | 56193 base upstream     | p31.1  | AC | 0.3748 | 1.725 | 3.58E-06  |
| 3  | rs9869809  | 176304233 | NAALADL2 | intron 2                | q26.31 | AT | 0.4775 | 0.615 | 4.07E-05  |
| 4  | rs10008591 | 132437567 | PCDH10   | 1852352 base upstream   | q28.3  | CT | 0.9712 | 0.345 | 6.77E-05  |
| 8  | rs16894295 | 97172072  | GDF6     | 51665 base upstream     | q22.1  | AG | 0.0573 | 2.416 | 0.0001202 |
| 4  | rs4624669  | 132434465 | PCDH10   | 1855454 base upstream   | q28.3  | AG | 0.9712 | 0.345 | 6.80E-05  |
| 2  | rs312918   | 172277833 | DYNC1I2  | intron 6                | q31.1  | CG | 0.2838 | 1.569 | 0.0002508 |
| 18 | rs2703175  | 37303085  | PIK3C3   | 486111 base upstream    | q12.3  | AG | 0.1099 | 0.415 | 0.0008618 |
| 1  | rs12076161 | 74161472  | LRRC44   | 102817 base upstream    | p31.1  | AC | 0.625  | 0.584 | 5.11E-06  |
| 4  | rs12504073 | 182937652 | ODZ3     | 544478 base upstream    | q35.1  | AC | 0.532  | 0.664 | 0.0009087 |
| 2  | rs7597387  | 172285362 | DYNC1I2  | intron 7                | q31.1  | CT | 0.2835 | 1.567 | 0.0002664 |
| 11 | rs600421   | 109526092 | ZC3H12C  | intron 2                | q22.3  | GT | 0.2508 | 1.609 | 0.0001717 |
| 1  | rs12077198 | 74161523  | LRRC44   | 102766 base upstream    | p31.1  | AG | 0.625  | 0.584 | 5.09E-06  |
| 4  | rs12641606 | 132409675 | PCDH10   | 1880244 base upstream   | q28.3  | CT | 0.0296 | 2.781 | 0.000173  |

|    |            |           |         |                       |        |    |        |       |           |
|----|------------|-----------|---------|-----------------------|--------|----|--------|-------|-----------|
| 4  | rs11947432 | 132410530 | PCDH10  | 1879389 base upstream | q28.3  | AG | 0.0295 | 2.783 | 0.0001699 |
| 2  | rs10206062 | 172285522 | DYNC1I2 | intron 7              | q31.1  | AT | 0.7165 | 0.638 | 0.0002678 |
| 6  | rs9384957  | 116166045 | FRK     | 203341 base upstream  | q22.1  | CT | 0.1769 | 1.621 | 0.0005427 |
| 7  | rs7809347  | 84545533  | SEMA3D  | intron 14             | q21.11 | AG | 0.8633 | 0.54  | 0.0001931 |
| 2  | rs12185567 | 172268975 | DYNC1I2 | intron 3              | q31.1  | AC | 0.2835 | 1.57  | 0.0002489 |
| 2  | rs13431831 | 38418548  | ARL6IP2 | intron 11             | p22.1  | CG | 0.2484 | 0.533 | 3.78E-05  |
| 1  | rs9662322  | 74224911  | LRRC44  | 39378 base upstream   | p31.1  | GT | 0.5953 | 0.567 | 4.84E-06  |
| 2  | rs973889   | 172288200 | DYNC1I2 | intron 7              | q31.1  | AG | 0.7167 | 0.639 | 0.0002741 |
| 2  | rs10177042 | 38417031  | ARL6IP2 | intron 11             | p22.1  | CG | 0.7163 | 1.877 | 1.26E-05  |
| 11 | rs2846615  | 109527801 | ZC3H12C | intron 2              | q22.3  | CT | 0.7493 | 0.622 | 0.0001786 |
| 1  | rs11265251 | 152423714 | TPM3    | intron 8              | q21.3  | CT | 0.4245 | 0.614 | 9.84E-05  |
| 2  | rs312925   | 172272168 | DYNC1I2 | intron 5              | q31.1  | AG | 0.2836 | 1.57  | 0.0002489 |
| 2  | rs10207085 | 172294131 | DYNC1I2 | intron 14             | q31.1  | GT | 0.2833 | 1.565 | 0.0002758 |
| 1  | rs10493526 | 74158268  | LRRC44  | 106021 base upstream  | p31.1  | CT | 0.3754 | 1.71  | 5.38E-06  |
| 11 | rs665013   | 109528838 | ZC3H12C | intron 2              | q22.3  | CT | 0.2505 | 1.603 | 0.0001968 |
| 11 | rs1675981  | 109527878 | ZC3H12C | intron 2              | q22.3  | GT | 0.7493 | 0.622 | 0.0001808 |
| 11 | rs667625   | 109528270 | ZC3H12C | intron 2              | q22.3  | GT | 0.7494 | 0.623 | 0.0001862 |
| 7  | rs13222785 | 84546498  | SEMA3D  | intron 14             | q21.11 | AG | 0.1367 | 1.853 | 0.0001926 |
| 11 | rs581464   | 109527592 | ZC3H12C | intron 2              | q22.3  | GT | 0.7493 | 0.622 | 0.0001756 |
| 6  | rs6901833  | 40745631  | LRFN2   | 82527 base downstream | p21.1  | AG | 0.2165 | 1.613 | 0.0008813 |
| 4  | rs10938138 | 72339473  | SLC4A4  | intron 2              | q13.3  | CG | 0.1148 | 1.98  | 9.33E-06  |
| 4  | rs12650549 | 72340320  | SLC4A4  | intron 3              | q13.3  | GT | 0.8855 | 0.506 | 9.84E-06  |
| 11 | rs622822   | 109528374 | ZC3H12C | intron 2              | q22.3  | GT | 0.2506 | 1.604 | 0.0001896 |
| 11 | rs649847   | 109529837 | ZC3H12C | intron 3              | q22.3  | CG | 0.2504 | 1.6   | 0.0002058 |
| 4  | rs4694388  | 72340027  | SLC4A4  | intron 3              | q13.3  | AG | 0.8855 | 0.506 | 9.76E-06  |
| 11 | rs683593   | 109526143 | ZC3H12C | intron 2              | q22.3  | AC | 0.7492 | 0.621 | 0.0001717 |
| 4  | rs10518587 | 132410710 | PCDH10  | 1879209 base upstream | q28.3  | GT | 0.0295 | 2.783 | 0.0001663 |
| 4  | rs2363717  | 72342980  | SLC4A4  | intron 3              | q13.3  | GT | 0.1141 | 1.973 | 1.07E-05  |
| 11 | rs694974   | 109524562 | ZC3H12C | intron 2              | q22.3  | CT | 0.7491 | 0.621 | 0.0001668 |
| 7  | rs7804456  | 148246576 | EZH2    | 34229 base downstream | q36.1  | CT | 0.2142 | 1.595 | 0.0005006 |
| 8  | rs10503418 | 11156393  | MTMR9   | 23016 base upstream   | p23.1  | CT | 0.4227 | 1.462 | 0.0009047 |
| 2  | rs6757773  | 172257876 | DYNC1I2 | intron 3              | q31.1  | AT | 0.7167 | 0.636 | 0.0002495 |
| 4  | rs9992638  | 132404922 | PCDH10  | 1884997 base upstream | q28.3  | AT | 0.9703 | 0.36  | 0.0001852 |
| 11 | rs679264   | 109531670 | ZC3H12C | intron 3              | q22.3  | AG | 0.7498 | 0.627 | 0.0002258 |
| 2  | rs6721680  | 172252159 | DYNC1I2 | 68 base upstream      | q31.1  | GT | 0.283  | 1.572 | 0.0002511 |
| 11 | rs17110877 | 109532396 | ZC3H12C | intron 3              | q22.3  | AG | 0.7499 | 0.628 | 0.0002353 |
| 1  | rs2789708  | 74129798  | LRRC44  | 134491 base upstream  | p31.1  | AT | 0.4293 | 1.669 | 1.37E-05  |

|    |            |           |          |                       |        |    |        |       |           |
|----|------------|-----------|----------|-----------------------|--------|----|--------|-------|-----------|
| 2  | rs6725388  | 172438261 | SLC25A12 | intron 16             | q31.1  | CG | 0.3196 | 1.505 | 0.0008992 |
| 2  | rs11678984 | 172244094 | DYNC1I2  | 8133 base upstream    | q31.1  | GT | 0.7174 | 0.637 | 0.0002661 |
| 1  | rs2792075  | 74129950  | LRRC44   | 134339 base upstream  | p31.1  | CT | 0.5708 | 0.599 | 1.39E-05  |
| 11 | rs585334   | 109530847 | ZC3H12C  | intron 3              | q22.3  | AG | 0.2503 | 1.598 | 0.0002168 |
| 11 | rs678835   | 109531787 | ZC3H12C  | intron 3              | q22.3  | CT | 0.2502 | 1.594 | 0.0002321 |
| 7  | rs17153906 | 26553081  | SCAP2    | 120133 base upstream  | p15.2  | CT | 0.7902 | 0.602 | 0.0001139 |
| 11 | rs3017769  | 109533247 | ZC3H12C  | intron 3              | q22.3  | AG | 0.25   | 1.59  | 0.000249  |
| 4  | rs2016353  | 72341689  | SLC4A4   | intron 3              | q13.3  | AG | 0.1142 | 1.974 | 1.06E-05  |
| 2  | rs2292815  | 172294897 | DYNC1I2  | intron 15             | q31.1  | CG | 0.7168 | 0.639 | 0.0002803 |
| 1  | rs6660710  | 74233724  | LRRC44   | 30565 base upstream   | p31.1  | AG | 0.5997 | 0.571 | 7.88E-06  |
| 1  | rs6663201  | 74233585  | LRRC44   | 30704 base upstream   | p31.1  | CT | 0.4001 | 1.75  | 7.90E-06  |
| 2  | rs2138348  | 172266418 | DYNC1I2  | intron 3              | q31.1  | GT | 0.7166 | 0.637 | 0.0002489 |
| 11 | rs622192   | 109538447 | ZC3H12C  | intron 4              | q22.3  | AT | 0.25   | 1.589 | 0.0002562 |
| 1  | rs2104861  | 225275244 | CDC42BPA | intron 5              | q42.13 | CT | 0.35   | 0.639 | 0.0006271 |
| 8  | rs542253   | 97177903  | GDF6     | 45834 base upstream   | q22.1  | AG | 0.0571 | 2.423 | 0.0001162 |
| 2  | rs4667694  | 172313645 | DYNC1I2  | 480 base downstream   | q31.1  | AG | 0.2831 | 1.563 | 0.0002908 |
| 8  | rs546474   | 97181208  | GDF6     | 42529 base upstream   | q22.1  | AG | 0.9429 | 0.411 | 0.0001127 |
| 2  | rs10166005 | 172315540 | DYNC1I2  | 2375 base downstream  | q31.1  | CT | 0.717  | 0.64  | 0.0002933 |
| 2  | rs4668412  | 172328016 | DYNC1I2  | 14851 base downstream | q31.1  | AG | 0.717  | 0.64  | 0.0002985 |
| 2  | rs10184866 | 172317202 | DYNC1I2  | 4037 base downstream  | q31.1  | GT | 0.283  | 1.562 | 0.0002946 |
| 10 | rs11597105 | 6552587   | PRKCQ    | intron 6              | p15.1  | AG | 0.1446 | 0.499 | 0.0009471 |
| 11 | rs621672   | 109538856 | ZC3H12C  | intron 4              | q22.3  | CT | 0.7501 | 0.629 | 0.0002503 |
| 2  | rs6745929  | 38406957  | ARL6IP2  | intron 11             | p22.1  | CT | 0.7334 | 1.958 | 1.06E-05  |
| 2  | rs1554166  | 172249855 | DYNC1I2  | 2372 base upstream    | q31.1  | GT | 0.7174 | 0.636 | 0.0002546 |
| 5  | rs1435195  | 105490206 | EFNA5    | 1254043 base upstream | q21.3  | CG | 0.1604 | 1.783 | 4.35E-05  |
| 1  | rs2343196  | 74235010  | LRRC44   | 29279 base upstream   | p31.1  | CT | 0.4007 | 1.754 | 7.91E-06  |
| 4  | rs2579331  | 72345306  | SLC4A4   | intron 3              | q13.3  | AG | 0.1302 | 1.87  | 2.37E-05  |
| 10 | rs11199590 | 122593274 | BRWD2    | 7410 base upstream    | q26.12 | CT | 0.02   | 3.592 | 5.76E-05  |
| 11 | rs602189   | 109525740 | ZC3H12C  | intron 2              | q22.3  | AG | 0.2344 | 1.624 | 0.0002395 |
| 2  | rs10194102 | 172334389 | SLC25A12 | 14737 base upstream   | q31.1  | CG | 0.2829 | 1.561 | 0.0003037 |
| 7  | rs6946693  | 69791004  | AUTS2    | intron 5              | q11.22 | GT | 0.3054 | 1.496 | 0.0008562 |
| 4  | rs2063658  | 21477856  | KCNIP4   | intron 8              | p15.31 | AT | 0.5138 | 0.654 | 0.0003271 |
| 11 | rs633410   | 109529896 | ZC3H12C  | intron 3              | q22.3  | CT | 0.2503 | 1.599 | 0.0002126 |
| 2  | rs6722757  | 172300209 | DYNC1I2  | intron 15             | q31.1  | AG | 0.7139 | 0.639 | 0.0002964 |
| 4  | rs9995748  | 132454388 | PCDH10   | 1835531 base upstream | q28.3  | CT | 0.033  | 2.789 | 0.0001127 |
| 11 | rs1026608  | 109540472 | ZC3H12C  | EXON 6                | q22.3  | AG | 0.7509 | 0.625 | 0.0002148 |
| 11 | rs1026607  | 109540511 | ZC3H12C  | EXON 6                | q22.3  | AG | 0.7509 | 0.625 | 0.0002153 |

|    |            |           |          |                       |        |    |        |       |           |
|----|------------|-----------|----------|-----------------------|--------|----|--------|-------|-----------|
| 2  | rs11904009 | 172335589 | SLC25A12 | 13537 base upstream   | q31.1  | GT | 0.2828 | 1.56  | 0.0003092 |
| 11 | rs653992   | 109524141 | ZC3H12C  | intron 2              | q22.3  | CT | 0.7493 | 0.621 | 0.0001706 |
| 3  | rs9290531  | 176306423 | NAALADL2 | intron 2              | q26.31 | AG | 0.5298 | 1.593 | 8.07E-05  |
| 7  | rs4461846  | 84530345  | SEMA3D   | intron 11             | q21.11 | CT | 0.864  | 0.583 | 0.0004403 |
| 4  | rs12641430 | 132449990 | PCDH10   | 1839929 base upstream | q28.3  | CT | 0.0329 | 2.799 | 0.0001067 |
| 8  | rs17069688 | 4084387   | CSMD1    | intron 67             | p23.2  | CG | 0.0446 | 2.771 | 1.39E-05  |
| 7  | rs2240394  | 84530877  | SEMA3D   | intron 11             | q21.11 | CT | 0.1361 | 1.718 | 0.0004363 |
| 2  | rs10174525 | 172343943 | SLC25A12 | 5183 base upstream    | q31.1  | CT | 0.2828 | 1.559 | 0.0003127 |
| 7  | rs2347338  | 6384803   | RAC1     | intron 1              | p22.1  | CT | 0.9649 | 0.392 | 0.0002421 |
| 2  | rs6705200  | 172345846 | SLC25A12 | 3280 base upstream    | q31.1  | AG | 0.7173 | 0.642 | 0.0003148 |
| 2  | rs10803863 | 172243583 | DYNC112  | 8644 base upstream    | q31.1  | CT | 0.7173 | 0.637 | 0.000274  |
| 4  | rs12641562 | 132446415 | PCDH10   | 1843504 base upstream | q28.3  | AC | 0.9672 | 0.354 | 8.97E-05  |
| 2  | rs10497374 | 172348869 | SLC25A12 | 257 base upstream     | q31.1  | AG | 0.7173 | 0.642 | 0.0003161 |
| 15 | rs4420510  | 89947230  | SLCO3A1  | 250719 base upstream  | q26.1  | AG | 0.3302 | 0.6   | 0.0001749 |
| 7  | rs16887818 | 84529379  | SEMA3D   | intron 11             | q21.11 | CG | 0.8641 | 0.583 | 0.0004441 |
| 6  | rs1415699  | 130357104 | L3MBTL3  | 24322 base upstream   | q22.33 | AG | 0.0848 | 0.263 | 6.63E-05  |
| 4  | rs12641624 | 132453787 | PCDH10   | 1836132 base upstream | q28.3  | CT | 0.967  | 0.358 | 0.000111  |
| 4  | rs2063656  | 21478155  | KCNIP4   | intron 8              | p15.31 | AC | 0.4729 | 1.492 | 0.0005537 |
| 5  | rs10479364 | 105631852 | EFNA5    | 1112397 base upstream | q21.3  | CT | 0.8364 | 0.542 | 1.94E-05  |
| 4  | rs10018289 | 132440597 | PCDH10   | 1849322 base upstream | q28.3  | AG | 0.0288 | 2.899 | 6.69E-05  |
| 3  | rs936475   | 176304842 | NAALADL2 | intron 2              | q26.31 | GT | 0.5661 | 0.632 | 5.22E-05  |
| 2  | rs908671   | 172398511 | SLC25A12 | intron 10             | q31.1  | CG | 0.7068 | 0.642 | 0.0003738 |
| 4  | rs12647579 | 132453477 | PCDH10   | 1836442 base upstream | q28.3  | AT | 0.967  | 0.358 | 0.0001103 |
| 2  | rs6710698  | 172304324 | DYNC112  | intron 15             | q31.1  | CG | 0.2987 | 1.549 | 0.0004992 |
| 8  | rs17069682 | 4083982   | CSMD1    | intron 67             | p23.2  | AC | 0.0445 | 2.767 | 1.48E-05  |
| 4  | rs11946051 | 132450305 | PCDH10   | 1839614 base upstream | q28.3  | GT | 0.9671 | 0.358 | 0.0001082 |
| 3  | rs17338506 | 102089971 | ABI3BP   | intron 31             | q12.2  | CT | 0.1436 | 1.836 | 0.0001612 |
| 5  | rs13154869 | 105619351 | EFNA5    | 1124898 base upstream | q21.3  | GT | 0.8365 | 0.542 | 1.94E-05  |
| 4  | rs2063657  | 21478058  | KCNIP4   | intron 8              | p15.31 | AG | 0.527  | 0.67  | 0.0005567 |
| 2  | rs7608403  | 172355011 | SLC25A12 | intron 3              | q31.1  | AC | 0.7169 | 0.645 | 0.0003633 |
| 2  | rs11757    | 172349291 | SLC25A12 | EXON 1                | q31.1  | CG | 0.7173 | 0.642 | 0.0003206 |
| 8  | rs17069679 | 4081661   | CSMD1    | intron 67             | p23.2  | AG | 0.0441 | 2.715 | 2.74E-05  |
| 2  | rs6754817  | 172371640 | SLC25A12 | intron 5              | q31.1  | CT | 0.7169 | 0.645 | 0.0003647 |
| 4  | rs12512316 | 21480772  | KCNIP4   | intron 8              | p15.31 | AG | 0.5265 | 0.675 | 0.0006364 |
| 12 | rs1504558  | 97093097  | TMPO     | 340442 base upstream  | q23.1  | CG | 0.6549 | 1.668 | 0.0004899 |
| 4  | rs12650292 | 132449623 | PCDH10   | 1840296 base upstream | q28.3  | AG | 0.0328 | 2.827 | 9.05E-05  |
| 2  | rs908670   | 172398426 | SLC25A12 | intron 10             | q31.1  | CT | 0.2932 | 1.557 | 0.0003731 |



|    |            |           |           |                         |        |    |        |       |           |
|----|------------|-----------|-----------|-------------------------|--------|----|--------|-------|-----------|
| 11 | rs584008   | 109531136 | ZC3H12C   | intron 3                | q22.3  | CT | 0.7444 | 0.61  | 0.0002356 |
| 5  | rs10040995 | 105596450 | EFNA5     | 1147799 base upstream   | q21.3  | CT | 0.8284 | 0.552 | 3.12E-05  |
| 13 | rs9555926  | 89090532  | GPC5      | 1758355 base upstream   | q31.3  | AG | 0.0266 | 2.8   | 0.0001766 |
| 2  | rs10167419 | 172358072 | SLC25A12  | intron 4                | q31.1  | AG | 0.7166 | 0.646 | 0.0003851 |
| 4  | rs980363   | 72358121  | SLC4A4    | intron 3                | q13.3  | AG | 0.7504 | 0.59  | 2.86E-05  |
| 4  | rs1316758  | 132492216 | PCDH10    | 1797703 base upstream   | q28.3  | CT | 0.0335 | 2.498 | 0.0003831 |
| 2  | rs4953868  | 133486143 | NAP5      | intron 12               | q21.2  | AG | 0.4372 | 0.647 | 0.0005784 |
| 2  | rs6759575  | 172397314 | SLC25A12  | intron 10               | q31.1  | CT | 0.7169 | 0.645 | 0.000364  |
| 2  | rs12692973 | 172350303 | SLC25A12  | intron 1                | q31.1  | CT | 0.7174 | 0.642 | 0.0003265 |
| 2  | rs3770445  | 172417165 | SLC25A12  | intron 14               | q31.1  | CT | 0.2934 | 1.556 | 0.0003811 |
| 16 | rs9935841  | 45096893  | SHCBP1    | 75074 base upstream     | q11.2  | AG | 0.1525 | 1.658 | 0.0005619 |
| 2  | rs12692978 | 172434227 | SLC25A12  | intron 16               | q31.1  | CT | 0.7256 | 0.64  | 0.0003887 |
| 15 | rs11637543 | 89900920  | SV2B      | 261268 base downstream  | q26.1  | CT | 0.2938 | 0.593 | 0.0001648 |
| 2  | rs2316431  | 236072455 | CENTG2    | intron 1                | q37.2  | CT | 0.8295 | 0.614 | 0.0007769 |
| 6  | rs2876066  | 130363872 | L3MBTL3   | 17554 base upstream     | q22.33 | AC | 0.0838 | 0.261 | 7.74E-05  |
| 4  | rs12504827 | 21481084  | KCNIP4    | intron 8                | p15.31 | AG | 0.4732 | 1.476 | 0.0007111 |
| 4  | rs11931096 | 132488079 | PCDH10    | 1801840 base upstream   | q28.3  | CT | 0.9664 | 0.397 | 0.0003622 |
| 6  | rs945889   | 130362937 | L3MBTL3   | 18489 base upstream     | q22.33 | CT | 0.0847 | 0.266 | 7.57E-05  |
| 4  | rs17051178 | 132486892 | PCDH10    | 1803027 base upstream   | q28.3  | GT | 0.0336 | 2.519 | 0.00036   |
| 2  | rs3770451  | 172376961 | SLC25A12  | intron 7                | q31.1  | GT | 0.283  | 1.551 | 0.0003581 |
| 2  | rs3770452  | 172376928 | SLC25A12  | intron 7                | q31.1  | AG | 0.7171 | 0.645 | 0.0003577 |
| 2  | rs7586207  | 172379340 | SLC25A12  | intron 8                | q31.1  | AG | 0.717  | 0.645 | 0.0003595 |
| 2  | rs4668414  | 172412537 | SLC25A12  | intron 14               | q31.1  | AC | 0.7166 | 0.645 | 0.0003735 |
| 2  | rs6758704  | 172363343 | SLC25A12  | intron 5                | q31.1  | CT | 0.2834 | 1.547 | 0.0003875 |
| 9  | rs10815714 | 7904008   | C9orf123  | 114209 base downstream  | p24.1  | CT | 0.1056 | 1.752 | 0.0008156 |
| 5  | rs974073   | 105493632 | EFNA5     | 1250617 base upstream   | q21.3  | GT | 0.1438 | 1.748 | 0.0001046 |
| 2  | rs1865951  | 236080078 | CENTG2    | intron 1                | q37.2  | AG | 0.8291 | 0.62  | 0.000827  |
| 5  | rs10520944 | 28874857  | CDH9      | 1800411 base downstream | p14.1  | AC | 0.7684 | 0.633 | 0.000731  |
| 3  | rs17588879 | 176306452 | NAALADL2  | intron 2                | q26.31 | AT | 0.4342 | 1.583 | 5.14E-05  |
| 5  | rs7705866  | 105596842 | EFNA5     | 1147407 base upstream   | q21.3  | CT | 0.1717 | 1.812 | 3.11E-05  |
| 16 | rs246240   | 16026525  | ABCC1     | intron 5                | p13.11 | AG | 0.8452 | 2.111 | 0.0001886 |
| 21 | rs363529   | 29936192  | GRIK1     | intron 9                | q21.3  | CG | 0.8489 | 0.594 | 0.0003994 |
| 5  | rs17616969 | 28895838  | CDH9      | 1821392 base downstream | p14.1  | AG | 0.7685 | 0.633 | 0.0007268 |
| 4  | rs1709257  | 71017595  | LOC401137 | 36897 base upstream     | q13.3  | AC | 0.0381 | 2.487 | 0.000442  |
| 5  | rs16898178 | 28851719  | CDH9      | 1777273 base downstream | p14.1  | AC | 0.7682 | 0.634 | 0.0007811 |
| 21 | rs16998436 | 40067833  | LOC150084 | intron 4                | q22.2  | CT | 0.0871 | 1.936 | 0.0003793 |
| 4  | rs4585325  | 132501459 | PCDH10    | 1788460 base upstream   | q28.3  | CT | 0.9665 | 0.4   | 0.0003838 |

|    |            |           |           |                       |        |    |        |       |           |
|----|------------|-----------|-----------|-----------------------|--------|----|--------|-------|-----------|
| 8  | rs17329730 | 53656739  | UNQ9433   | 16174 base downstream | q11.23 | AT | 0.4365 | 1.497 | 0.0009241 |
| 4  | rs17051177 | 132486687 | PCDH10    | 1803232 base upstream | q28.3  | AG | 0.0336 | 2.52  | 0.0003594 |
| 4  | rs1991316  | 95487295  | PGDS      | 4245 base downstream  | q22.3  | GT | 0.3718 | 1.499 | 0.0006844 |
| 4  | rs1040036  | 21465676  | KCNIP4    | intron 8              | p15.31 | GT | 0.5249 | 0.677 | 0.0009154 |
| 2  | rs6724337  | 172443575 | SLC25A12  | intron 16             | q31.1  | CT | 0.7166 | 0.645 | 0.0003724 |
| 4  | rs11940669 | 132476044 | PCDH10    | 1813875 base upstream | q28.3  | CT | 0.9664 | 0.396 | 0.0003523 |
| 2  | rs7599284  | 236075691 | CENTG2    | intron 1              | q37.2  | AG | 0.8291 | 0.62  | 0.0008281 |
| 4  | rs8180150  | 132508352 | PCDH10    | 1781567 base upstream | q28.3  | AC | 0.0334 | 2.481 | 0.0004032 |
| 16 | rs3814883  | 29902423  | TAOK2     | EXON 13               | p11.2  | CT | 0.517  | 0.623 | 0.0001385 |
| 4  | rs2865353  | 95489901  | PGDS      | 6851 base downstream  | q22.3  | CT | 0.6283 | 0.667 | 0.0006833 |
| 4  | rs7438414  | 95484845  | PGDS      | 1795 base downstream  | q22.3  | CT | 0.6282 | 0.667 | 0.0006842 |
| 5  | rs972529   | 105495362 | EFNA5     | 1248887 base upstream | q21.3  | AC | 0.8562 | 0.572 | 0.0001046 |
| 4  | rs17051181 | 132509434 | PCDH10    | 1780485 base upstream | q28.3  | CT | 0.0334 | 2.481 | 0.0004022 |
| 21 | rs2837204  | 40067939  | LOC150084 | intron 4              | q22.2  | CT | 0.095  | 1.908 | 0.0002721 |
| 4  | rs4282187  | 95492168  | PGDS      | 9118 base downstream  | q22.3  | CT | 0.6283 | 0.667 | 0.0006838 |
| 16 | rs246214   | 16022393  | ABCC1     | intron 5              | p13.11 | CT | 0.845  | 2.107 | 0.0001895 |
| 3  | rs17588796 | 176306392 | NAALADL2  | intron 2              | q26.31 | AG | 0.4341 | 1.582 | 5.25E-05  |
| 4  | rs11727030 | 95481688  | PGDS      | intron 5              | q22.3  | AG | 0.3719 | 1.499 | 0.0006851 |
| 21 | rs16998444 | 40068571  | LOC150084 | intron 4              | q22.2  | AG | 0.0872 | 1.935 | 0.0003835 |
| 5  | rs10063657 | 105638139 | EFNA5     | 1106110 base upstream | q21.3  | CT | 0.172  | 1.819 | 2.96E-05  |
| 3  | rs936474   | 176305423 | NAALADL2  | intron 2              | q26.31 | AG | 0.5661 | 0.632 | 5.22E-05  |
| 1  | rs4650237  | 74232437  | LRRC44    | 31852 base upstream   | p31.1  | GT | 0.5595 | 0.592 | 2.62E-05  |
| 5  | rs1991970  | 105458740 | EFNA5     | 1285509 base upstream | q21.3  | AC | 0.1437 | 1.749 | 0.0001017 |
| 4  | rs8180189  | 132509387 | PCDH10    | 1780532 base upstream | q28.3  | CT | 0.9666 | 0.403 | 0.0004026 |
| 18 | rs2635509  | 44768190  | SMAD7     | 37111 base downstream | q21.1  | AG | 0.4226 | 1.618 | 6.37E-05  |
| 10 | rs11199677 | 122705142 | BRWD2     | 46117 base downstream | q26.12 | AC | 0.0208 | 3.753 | 4.75E-05  |
| 4  | rs724260   | 95479708  | PGDS      | intron 5              | q22.3  | AG | 0.3719 | 1.499 | 0.0006853 |
| 4  | rs6840479  | 95494865  | PGDS      | 11815 base downstream | q22.3  | AG | 0.3708 | 1.5   | 0.0007004 |
| 6  | rs9396812  | 17953140  | KIF13A    | intron 29             | p22.3  | AG | 0.5858 | 0.678 | 0.0006775 |
| 4  | rs1343670  | 132503523 | PCDH10    | 1786396 base upstream | q28.3  | CT | 0.0334 | 2.48  | 0.0004043 |
| 6  | rs7759444  | 40754017  | LRFN2     | 90913 base downstream | p21.1  | AG | 0.2005 | 1.608 | 0.0004671 |
| 5  | rs12719550 | 105507616 | EFNA5     | 1236633 base upstream | q21.3  | AT | 0.8561 | 0.572 | 0.0001057 |
| 7  | rs7800255  | 84532070  | SEMA3D    | intron 11             | q21.11 | AT | 0.1327 | 1.758 | 0.0007137 |
| 8  | rs10903331 | 10769957  | XKR6      | 21109 base upstream   | p23.1  | CG | 0.1939 | 0.449 | 1.68E-05  |
| 8  | rs2919390  | 32646497  | NRG1      | intron 3              | p12    | AC | 0.6049 | 1.606 | 0.0002093 |
| 1  | rs11210390 | 74227364  | LRRC44    | 36925 base upstream   | p31.1  | CT | 0.4403 | 1.686 | 2.63E-05  |
| 2  | rs938675   | 236087152 | CENTG2    | intron 1              | q37.2  | CT | 0.8289 | 0.625 | 0.0009575 |

|    |            |           |          |                         |        |    |        |       |           |
|----|------------|-----------|----------|-------------------------|--------|----|--------|-------|-----------|
| 3  | rs17059208 | 41611668  | ULK4     | intron 6                | p22.1  | CG | 0.9443 | 0.422 | 0.0001236 |
| 3  | rs9848123  | 176299863 | NAALADL2 | intron 2                | q26.31 | AG | 0.4047 | 0.627 | 0.0001476 |
| 16 | rs12325539 | 29941134  | FLJ25404 | 1021 base upstream      | p11.2  | CT | 0.4039 | 1.663 | 0.0001161 |
| 16 | rs11150581 | 29938200  | FLJ25404 | 3955 base upstream      | p11.2  | CT | 0.4037 | 1.657 | 0.0001145 |
| 10 | rs11199603 | 122607331 | BRWD2    | intron 2                | q26.12 | AG | 0.9812 | 0.284 | 8.31E-05  |
| 16 | rs11642612 | 29937696  | FLJ25404 | 4459 base upstream      | p11.2  | AC | 0.5964 | 0.604 | 0.0001144 |
| 4  | rs4146422  | 132508470 | PCDH10   | 1781449 base upstream   | q28.3  | CT | 0.9666 | 0.403 | 0.0004032 |
| 9  | rs1322303  | 10639309  | PTPRD    | 36800 base downstream   | p23    | AG | 0.7631 | 0.618 | 0.0001344 |
| 10 | rs11199612 | 122621095 | BRWD2    | intron 10               | q26.12 | CT | 0.9813 | 0.285 | 8.72E-05  |
| 2  | rs4663602  | 236091352 | CENTG2   | intron 1                | q37.2  | AG | 0.1712 | 1.6   | 0.0009678 |
| 15 | rs4775230  | 58091041  | FOXB1    | 5607 base downstream    | q22.2  | CT | 0.1623 | 1.683 | 0.0005146 |
| 5  | rs10073985 | 105575000 | EFNA5    | 1169249 base upstream   | q21.3  | CT | 0.8546 | 0.558 | 5.50E-05  |
| 10 | rs11199613 | 122622408 | BRWD2    | intron 10               | q26.12 | CT | 0.0187 | 3.508 | 8.75E-05  |
| 10 | rs12355961 | 122624977 | BRWD2    | intron 11               | q26.12 | AG | 0.0186 | 3.505 | 8.87E-05  |
| 15 | rs9920841  | 58089832  | FOXB1    | 4398 base downstream    | q22.2  | AG | 0.8377 | 0.594 | 0.0005162 |
| 10 | rs12355108 | 122623411 | BRWD2    | EXON 11                 | q26.12 | CT | 0.9813 | 0.285 | 8.78E-05  |
| 2  | rs2316435  | 236090677 | CENTG2   | intron 1                | q37.2  | AT | 0.8288 | 0.625 | 0.0009674 |
| 9  | rs1923439  | 10638898  | PTPRD    | 36389 base downstream   | p23    | GT | 0.237  | 1.619 | 0.0001367 |
| 2  | rs4663604  | 236094249 | CENTG2   | intron 1                | q37.2  | AG | 0.1712 | 1.6   | 0.0009712 |
| 5  | rs1423298  | 28807655  | CDH9     | 1733209 base downstream | p14.1  | CT | 0.2314 | 1.578 | 0.0007495 |
| 3  | rs7646135  | 176312988 | NAALADL2 | intron 2                | q26.31 | AT | 0.4385 | 1.57  | 8.47E-05  |
| 2  | rs6753473  | 26379923  | GPR113   | 4621 base upstream      | p23.3  | GT | 0.0235 | 2.87  | 0.0002956 |
| 2  | rs10460276 | 236094532 | CENTG2   | intron 1                | q37.2  | CT | 0.8288 | 0.625 | 0.0009762 |
| 4  | rs6821156  | 154491352 | MND1     | intron 2                | q31.3  | AT | 0.5646 | 0.612 | 9.20E-05  |
| 5  | rs17583873 | 28990579  | CDH9     | 1916133 base downstream | p14.1  | CT | 0.232  | 1.578 | 0.0007753 |
| 2  | rs6731720  | 236095585 | CENTG2   | intron 1                | q37.2  | GT | 0.1712 | 1.6   | 0.0009782 |
| 5  | rs11742039 | 6574824   | NSUN2    | 77530 base upstream     | p15.31 | GT | 0.2049 | 1.717 | 0.0002294 |
| 15 | rs7495265  | 89951919  | SLCO3A1  | 246030 base upstream    | q26.1  | CT | 0.2946 | 0.564 | 0.0001157 |
| 1  | rs12593    | 225238913 | CABC1    | EXON 12                 | q42.13 | CT | 0.5255 | 0.658 | 0.0002853 |
| 1  | rs11210389 | 74227289  | LRRC44   | 37000 base upstream     | p31.1  | AC | 0.4398 | 1.681 | 2.64E-05  |
| 7  | rs10259316 | 17412231  | AHR      | 59934 base downstream   | p21.1  | GT | 0.3895 | 0.615 | 0.0004296 |
| 10 | rs12360470 | 122586221 | BRWD2    | 14463 base upstream     | q26.12 | AG | 0.0215 | 3.504 | 5.25E-05  |
| 3  | rs1381130  | 176299621 | NAALADL2 | intron 2                | q26.31 | CT | 0.4047 | 0.627 | 0.0001481 |
| 6  | rs11962303 | 40752262  | LRFN2    | 89158 base downstream   | p21.1  | AC | 0.2011 | 1.591 | 0.0005956 |
| 8  | rs3898733  | 124803982 | ANXA13   | intron 10               | q24.13 | CT | 0.6952 | 1.623 | 0.0009095 |
| 16 | rs17291845 | 53802538  | IRX6     | 113433 base upstream    | q12.2  | AG | 0.1336 | 1.671 | 0.0009338 |
| 4  | rs4694387  | 72339718  | SLC4A4   | intron 2                | q13.3  | AC | 0.1146 | 1.979 | 9.57E-06  |

|    |            |           |           |                       |        |    |        |       |           |
|----|------------|-----------|-----------|-----------------------|--------|----|--------|-------|-----------|
| 8  | rs17069674 | 4081435   | CSMD1     | intron 67             | p23.2  | CT | 0.0425 | 2.655 | 5.69E-05  |
| 10 | rs11199632 | 122645462 | BRWD2     | intron 19             | q26.12 | CT | 0.9815 | 0.286 | 9.51E-05  |
| 18 | rs4800580  | 20402119  | HRH4      | 88201 base downstream | q11.2  | AG | 0.3361 | 0.644 | 0.0009324 |
| 10 | rs12355611 | 122646633 | BRWD2     | intron 19             | q26.12 | AC | 0.9815 | 0.287 | 9.66E-05  |
| 10 | rs12355703 | 122589381 | BRWD2     | 11303 base upstream   | q26.12 | CG | 0.0214 | 3.521 | 5.22E-05  |
| 9  | rs4380991  | 10655668  | PTPRD     | 53159 base downstream | p23    | AT | 0.1457 | 1.891 | 4.95E-05  |
| 1  | rs6665290  | 225267729 | CDC42BPA  | intron 3              | q42.13 | CT | 0.5203 | 0.655 | 0.0003034 |
| 5  | rs11134164 | 6575043   | NSUN2     | 77311 base upstream   | p15.31 | AG | 0.7942 | 0.586 | 0.0002638 |
| 1  | rs11165870 | 97668350  | DPYD      | intron 9              | p21.3  | CT | 0.4468 | 0.614 | 7.16E-05  |
| 3  | rs4505709  | 176311011 | NAALADL2  | intron 2              | q26.31 | AG | 0.4396 | 1.564 | 9.40E-05  |
| 3  | rs9859106  | 176302128 | NAALADL2  | intron 2              | q26.31 | AT | 0.3972 | 0.638 | 0.0002635 |
| 3  | rs6782155  | 176310488 | NAALADL2  | intron 2              | q26.31 | AG | 0.4394 | 1.563 | 9.46E-05  |
| 18 | rs9304467  | 20403162  | HRH4      | 89244 base downstream | q11.2  | AG | 0.3365 | 0.645 | 0.0009399 |
| 4  | rs16849331 | 74496772  | ALB       | intron 7              | q13.3  | GT | 0.971  | 0.359 | 0.0002017 |
| 18 | rs9950310  | 20403739  | HRH4      | 89821 base downstream | q11.2  | CT | 0.3367 | 0.645 | 0.0009435 |
| 1  | rs6693140  | 107983470 | VAV3      | intron 7              | p13.3  | CT | 0.19   | 1.624 | 0.0002826 |
| 3  | rs6796537  | 176315077 | NAALADL2  | intron 2              | q26.31 | CT | 0.4428 | 0.635 | 0.0001379 |
| 3  | rs6797510  | 176309960 | NAALADL2  | intron 2              | q26.31 | AG | 0.4393 | 1.562 | 9.60E-05  |
| 18 | rs4800186  | 20407884  | HRH4      | 93966 base downstream | q11.2  | AT | 0.6625 | 1.549 | 0.0009676 |
| 3  | rs6797428  | 176309927 | NAALADL2  | intron 2              | q26.31 | AG | 0.4392 | 1.562 | 9.64E-05  |
| 6  | rs1471546  | 136513493 | PDE7B     | intron 5              | q23.3  | CT | 0.4191 | 1.601 | 6.28E-05  |
| 9  | rs10809144 | 10637333  | PTPRD     | 34824 base downstream | p23    | CT | 0.2374 | 1.615 | 0.0001459 |
| 3  | rs6809009  | 176315114 | NAALADL2  | intron 2              | q26.31 | GT | 0.5573 | 1.576 | 0.0001378 |
| 3  | rs6774509  | 176315311 | NAALADL2  | intron 2              | q26.31 | AT | 0.4427 | 0.635 | 0.0001378 |
| 6  | rs1038214  | 136520887 | PDE7B     | intron 8              | q23.3  | AG | 0.5753 | 0.633 | 8.60E-05  |
| 3  | rs6774272  | 176319087 | NAALADL2  | intron 2              | q26.31 | CT | 0.5571 | 1.583 | 0.0001361 |
| 3  | rs6773961  | 176318751 | NAALADL2  | intron 2              | q26.31 | AT | 0.5573 | 1.576 | 0.0001377 |
| 3  | rs11710345 | 176309283 | NAALADL2  | intron 2              | q26.31 | AG | 0.4392 | 1.562 | 9.66E-05  |
| 2  | rs1712005  | 115906362 | DPP10     | intron 3              | q14.1  | AG | 0.0912 | 1.912 | 0.0001381 |
| 3  | rs6809556  | 176318826 | NAALADL2  | intron 2              | q26.31 | CT | 0.4427 | 0.635 | 0.0001376 |
| 3  | rs2862042  | 176319542 | NAALADL2  | intron 2              | q26.31 | CT | 0.4431 | 0.629 | 0.0001351 |
| 19 | rs12976005 | 37368143  | ZNF507    | 160249 base upstream  | q13.11 | CG | 0.4801 | 1.568 | 0.0001498 |
| 3  | rs4355289  | 176311154 | NAALADL2  | intron 2              | q26.31 | AG | 0.5571 | 1.575 | 0.0001398 |
| 3  | rs9877212  | 176314128 | NAALADL2  | intron 2              | q26.31 | CT | 0.5572 | 1.575 | 0.0001381 |
| 21 | rs16998556 | 40093555  | LOC150084 | intron 8              | q22.2  | GT | 0.9133 | 0.512 | 0.0003171 |
| 4  | rs11099102 | 132536774 | PCDH10    | 1753145 base upstream | q28.3  | CT | 0.0324 | 2.453 | 0.0006265 |
| 13 | rs9555925  | 89090502  | GPC5      | 1758385 base upstream | q31.3  | CT | 0.0266 | 2.8   | 0.0001769 |

|    |            |           |           |                        |        |    |        |       |           |
|----|------------|-----------|-----------|------------------------|--------|----|--------|-------|-----------|
| 2  | rs11679270 | 38422312  | ARL6IP2   | intron 11              | p22.1  | AC | 0.319  | 0.561 | 2.32E-05  |
| 18 | rs9304466  | 20402971  | HRH4      | 89053 base downstream  | q11.2  | CG | 0.6638 | 1.552 | 0.0009341 |
| 2  | rs11679271 | 38422331  | ARL6IP2   | intron 11              | p22.1  | CT | 0.6811 | 1.784 | 2.31E-05  |
| 21 | rs16998519 | 40087119  | LOC150084 | intron 7               | q22.2  | GT | 0.0863 | 1.967 | 0.0002768 |
| 16 | rs12935507 | 53798452  | IRX6      | 117519 base upstream   | q12.2  | AT | 0.8662 | 0.595 | 0.0009672 |
| 3  | rs9847129  | 176312381 | NAALADL2  | intron 2               | q26.31 | CT | 0.4429 | 0.635 | 0.0001395 |
| 4  | rs11936773 | 132537559 | PCDH10    | 1752360 base upstream  | q28.3  | GT | 0.9677 | 0.408 | 0.0006234 |
| 9  | rs4131202  | 10643484  | PTPRD     | 40975 base downstream  | p23    | CT | 0.7793 | 0.59  | 7.16E-05  |
| 16 | rs2647972  | 50225696  | SALL1     | 483012 base downstream | q12.1  | CT | 0.4858 | 1.541 | 0.0004213 |
| 1  | rs12354219 | 97693544  | DPYD      | intron 10              | p21.3  | CT | 0.4422 | 0.61  | 6.32E-05  |
| 4  | rs12648650 | 132565936 | PCDH10    | 1723983 base upstream  | q28.3  | AC | 0.9678 | 0.406 | 0.0005888 |
| 5  | rs9327956  | 105488872 | EFNA5     | 1255377 base upstream  | q21.3  | CT | 0.1438 | 1.748 | 0.0001039 |
| 6  | rs4896202  | 136514189 | PDE7B     | intron 6               | q23.3  | GT | 0.4192 | 1.6   | 6.18E-05  |
| 6  | rs9320545  | 116106532 | FRK       | 262854 base upstream   | q22.1  | CT | 0.7825 | 0.632 | 0.000523  |
| 12 | rs1847534  | 97094264  | TMPO      | 339275 base upstream   | q23.1  | AC | 0.323  | 0.604 | 0.0007308 |
| 4  | rs6532482  | 95496437  | PGDS      | 13387 base downstream  | q22.3  | AG | 0.3647 | 1.51  | 0.0004858 |
| 5  | rs4702359  | 6574202   | NSUN2     | 78152 base upstream    | p15.31 | AG | 0.7625 | 0.586 | 0.0001128 |
| 10 | rs11199530 | 122502220 | BRWD2     | 98464 base upstream    | q26.12 | AG | 0.9762 | 0.294 | 9.65E-05  |
| 15 | rs729978   | 58974308  | RORA      | intron 10              | q22.2  | CT | 0.3038 | 0.606 | 0.0006601 |
| 4  | rs11945624 | 132550197 | PCDH10    | 1739722 base upstream  | q28.3  | AG | 0.0323 | 2.457 | 0.0006124 |
| 4  | rs6532481  | 95496334  | PGDS      | 13284 base downstream  | q22.3  | GT | 0.6352 | 0.662 | 0.0004826 |
| 6  | rs1471545  | 136513400 | PDE7B     | intron 5               | q23.3  | CT | 0.419  | 1.601 | 6.27E-05  |
| 16 | rs7204626  | 50235764  | SALL1     | 493080 base downstream | q12.1  | CT | 0.2801 | 1.59  | 0.0001191 |
| 4  | rs1911882  | 132482173 | PCDH10    | 1807746 base upstream  | q28.3  | CT | 0.0336 | 2.524 | 0.0003539 |
| 1  | rs4949953  | 97677368  | DPYD      | intron 9               | p21.3  | CT | 0.4463 | 0.613 | 7.03E-05  |
| 1  | rs6659424  | 225264498 | CDC42BPA  | intron 3               | q42.13 | AG | 0.5173 | 0.661 | 0.000331  |
| 9  | rs13299260 | 123780890 | TTLL11    | 10122 base upstream    | q33.2  | CT | 0.5053 | 1.499 | 0.0005451 |
| 18 | rs12607480 | 41955585  | CCDC5     | intron 4               | q21.1  | AG | 0.1424 | 0.479 | 0.0007334 |
| 1  | rs12129397 | 97673140  | DPYD      | intron 9               | p21.3  | AT | 0.5535 | 1.63  | 7.07E-05  |
| 1  | rs11165873 | 97675378  | DPYD      | intron 9               | p21.3  | AT | 0.5536 | 1.63  | 7.05E-05  |
| 3  | rs212039   | 60013621  | FHIT      | intron 5               | p14.2  | CT | 0.9085 | 0.537 | 0.0003842 |
| 4  | rs1593554  | 95497524  | PGDS      | 14474 base downstream  | q22.3  | CT | 0.3648 | 1.511 | 0.0004852 |
| 15 | rs729977   | 58974360  | RORA      | intron 10              | q22.2  | CT | 0.6959 | 1.641 | 0.0006717 |
| 1  | rs1929862  | 225266341 | CDC42BPA  | intron 3               | q42.13 | AG | 0.4828 | 1.513 | 0.0003301 |
| 1  | rs12403236 | 225263125 | CDC42BPA  | intron 3               | q42.13 | CG | 0.5165 | 0.663 | 0.0003738 |
| 8  | rs12541855 | 32647451  | NRG1      | intron 3               | p12    | CT | 0.6371 | 1.588 | 0.0003957 |
| 16 | rs3814881  | 29908402  | TAOK2     | intron 16              | p11.2  | AG | 0.4525 | 1.544 | 0.0002381 |

|    |            |           |           |                        |        |    |        |       |           |
|----|------------|-----------|-----------|------------------------|--------|----|--------|-------|-----------|
| 4  | rs16849372 | 74514655  | AFP       | 6141 base upstream     | q13.3  | AT | 0.0291 | 2.781 | 0.0002026 |
| 3  | rs212041   | 60013318  | FHIT      | intron 5               | p14.2  | GT | 0.9086 | 0.537 | 0.0003937 |
| 2  | rs11902679 | 26381302  | GPR113    | 3242 base upstream     | p23.3  | CT | 0.9765 | 0.348 | 0.0002974 |
| 16 | rs2647971  | 50225366  | SALL1     | 482682 base downstream | q12.1  | CT | 0.4857 | 1.538 | 0.0004312 |
| 1  | rs12409755 | 225263572 | CDC42BPA  | intron 3               | q42.13 | AT | 0.5166 | 0.663 | 0.0003658 |
| 4  | rs9997915  | 95497050  | PGDS      | 14000 base downstream  | q22.3  | CT | 0.3648 | 1.511 | 0.0004854 |
| 1  | rs6704144  | 225267653 | CDC42BPA  | intron 3               | q42.13 | CG | 0.4828 | 1.514 | 0.0003287 |
| 4  | rs6535584  | 149309538 | NR3C2     | intron 5               | q31.23 | CT | 0.5913 | 1.528 | 0.0004436 |
| 1  | rs3897854  | 97690894  | DPYD      | intron 10              | p21.3  | CT | 0.5578 | 1.64  | 6.33E-05  |
| 4  | rs6839224  | 95498237  | PGDS      | 15187 base downstream  | q22.3  | GT | 0.6352 | 0.662 | 0.0004851 |
| 16 | rs3935873  | 29926001  | DOC2A     | EXON 6                 | p11.2  | CT | 0.5481 | 0.645 | 0.0002116 |
| 16 | rs2346943  | 7435187   | A2BP1     | intron 4               | p13.2  | GT | 0.4305 | 0.657 | 0.000534  |
| 1  | rs7550959  | 97699427  | DPYD      | intron 10              | p21.3  | AG | 0.4364 | 0.614 | 9.59E-05  |
| 1  | rs2149186  | 89277631  | GBP1      | 12943 base upstream    | p22.2  | GT | 0.1644 | 0.487 | 0.000389  |
| 16 | rs9933246  | 7437703   | A2BP1     | intron 4               | p13.2  | CT | 0.4304 | 0.659 | 0.0005856 |
| 1  | rs6426559  | 225262499 | CDC42BPA  | intron 3               | q42.13 | CT | 0.4835 | 1.508 | 0.0003713 |
| 2  | rs1375010  | 38411164  | ARL6IP2   | intron 11              | p22.1  | AG | 0.3228 | 0.567 | 2.62E-05  |
| 2  | rs10496652 | 126453217 | GYPC      | 676936 base upstream   | q14.3  | AG | 0.2699 | 0.594 | 0.000593  |
| 4  | rs6844516  | 74453060  | ALB       | 35809 base upstream    | q13.3  | AT | 0.0289 | 2.801 | 0.0002008 |
| 21 | rs16998521 | 40087288  | LOC150084 | intron 7               | q22.2  | AG | 0.0863 | 1.967 | 0.0002769 |
| 2  | rs1717054  | 115906019 | DPP10     | intron 3               | q14.1  | CT | 0.9088 | 0.523 | 0.0001365 |
| 2  | rs1437896  | 133485247 | NAP5      | intron 12              | q21.2  | CT | 0.413  | 0.657 | 0.0009846 |
| 13 | rs994066   | 89081759  | GPC5      | 1767128 base upstream  | q31.3  | CG | 0.0267 | 2.801 | 0.0001865 |
| 16 | rs3814880  | 29925396  | DOC2A     | intron 2               | p11.2  | CT | 0.4519 | 1.55  | 0.0002136 |
| 4  | rs12649130 | 132578708 | PCDH10    | 1711211 base upstream  | q28.3  | CG | 0.9678 | 0.406 | 0.0005891 |
| 1  | rs1045252  | 225248178 | CDC42BPA  | EXON 1                 | q42.13 | AG | 0.5168 | 0.663 | 0.0003577 |
| 13 | rs2325129  | 43897258  | TSC22D1   | 8402 base upstream     | q14.11 | CT | 0.4206 | 0.626 | 0.0001984 |
| 1  | rs11588904 | 225262834 | CDC42BPA  | intron 3               | q42.13 | CT | 0.4835 | 1.508 | 0.0003723 |
| 1  | rs1062908  | 225248177 | CDC42BPA  | EXON 1                 | q42.13 | CG | 0.5169 | 0.663 | 0.000357  |
| 18 | rs8083916  | 41948674  | CCDC5     | intron 2               | q21.1  | AC | 0.1418 | 0.487 | 0.0008544 |
| 1  | rs3795451  | 225248546 | CDC42BPA  | EXON 1                 | q42.13 | CT | 0.5168 | 0.663 | 0.0003591 |
| 1  | rs1045287  | 225245585 | CDC42BPA  | EXON 1                 | q42.13 | CT | 0.4831 | 1.509 | 0.000356  |
| 1  | rs3795449  | 225248461 | CDC42BPA  | EXON 1                 | q42.13 | GT | 0.4832 | 1.509 | 0.0003584 |
| 1  | rs7541033  | 225254994 | CDC42BPA  | intron 2               | q42.13 | AC | 0.4829 | 1.51  | 0.0003479 |
| 1  | rs1186     | 225244354 | CDC42BPA  | EXON 1                 | q42.13 | AT | 0.5169 | 0.662 | 0.0003554 |
| 8  | rs2406453  | 3078201   | CSMD1     | intron 44              | p23.2  | CG | 0.0453 | 2.176 | 0.0008694 |
| 1  | rs1045290  | 225245323 | CDC42BPA  | EXON 1                 | q42.13 | AG | 0.5169 | 0.663 | 0.0003557 |

|    |            |           |           |                        |        |    |        |       |           |
|----|------------|-----------|-----------|------------------------|--------|----|--------|-------|-----------|
| 18 | rs4243278  | 41961878  | CCDC5     | intron 8               | q21.1  | AG | 0.8575 | 2.096 | 0.0007127 |
| 1  | rs3768425  | 225244750 | CDC42BPA  | EXON 1                 | q42.13 | AG | 0.5169 | 0.662 | 0.0003555 |
| 1  | rs1343743  | 225249748 | CDC42BPA  | intron 2               | q42.13 | CT | 0.5166 | 0.663 | 0.0003645 |
| 1  | rs1045289  | 225245336 | CDC42BPA  | EXON 1                 | q42.13 | CT | 0.5169 | 0.663 | 0.0003558 |
| 1  | rs2297418  | 225259202 | CDC42BPA  | intron 2               | q42.13 | AC | 0.5161 | 0.663 | 0.0003802 |
| 1  | rs11587443 | 225254519 | CDC42BPA  | intron 2               | q42.13 | CT | 0.4835 | 1.508 | 0.0003684 |
| 18 | rs12185417 | 20409016  | HRH4      | 95098 base downstream  | q11.2  | AC | 0.3337 | 0.636 | 0.0007598 |
| 6  | rs9494457  | 136516487 | PDE7B     | intron 6               | q23.3  | AT | 0.3987 | 1.606 | 7.09E-05  |
| 2  | rs843385   | 115894049 | DPP10     | intron 3               | q14.1  | CT | 0.0911 | 1.921 | 0.0001201 |
| 1  | rs10916075 | 225250697 | CDC42BPA  | intron 2               | q42.13 | AG | 0.4835 | 1.509 | 0.0003665 |
| 18 | rs1945153  | 20409841  | HRH4      | 95923 base downstream  | q11.2  | AG | 0.6619 | 1.547 | 0.0009862 |
| 2  | rs17650774 | 6830471   | LOC129607 | 75432 base upstream    | p25.2  | AG | 0.74   | 0.636 | 0.0002943 |
| 1  | rs1045285  | 225245677 | CDC42BPA  | EXON 1                 | q42.13 | AG | 0.4831 | 1.509 | 0.0003562 |
| 5  | rs931062   | 6573684   | NSUN2     | 78670 base upstream    | p15.31 | CT | 0.2056 | 1.702 | 0.0002619 |
| 9  | rs11794075 | 120842902 | DBC1      | 125826 base upstream   | q33.1  | AG | 0.9087 | 0.501 | 6.98E-05  |
| 6  | rs4896198  | 136507126 | PDE7B     | intron 3               | q23.3  | CT | 0.4034 | 1.601 | 8.28E-05  |
| 6  | rs12662330 | 136508312 | PDE7B     | intron 3               | q23.3  | AC | 0.5964 | 0.624 | 7.98E-05  |
| 13 | rs9560407  | 89086817  | GPC5      | 1762070 base upstream  | q31.3  | AG | 0.9734 | 0.357 | 0.0001788 |
| 6  | rs9449500  | 83338480  | TPBG      | 205147 base downstream | q14.1  | GT | 0.032  | 2.519 | 0.0005234 |
| 13 | rs11619041 | 43927733  | TSC22D1   | intron 2               | q14.11 | AG | 0.5758 | 1.557 | 0.0003174 |
| 1  | rs17536161 | 115171509 | SYCP1     | 27468 base upstream    | p13.2  | AG | 0.0433 | 2.366 | 0.0009034 |
| 9  | rs16909038 | 2668958   | VLDLR     | 24473 base downstream  | p24.2  | CG | 0.9267 | 0.502 | 0.0003008 |
| 1  | rs10495273 | 225249982 | CDC42BPA  | intron 2               | q42.13 | GT | 0.4834 | 1.509 | 0.0003652 |
| 1  | rs6684821  | 225256856 | CDC42BPA  | intron 2               | q42.13 | AG | 0.4837 | 1.508 | 0.0003736 |
| 3  | rs13091963 | 102220701 | ABI3BP    | 25697 base downstream  | q12.2  | AG | 0.2905 | 1.621 | 8.21E-05  |
| 16 | rs9924686  | 29910577  | TAOK2     | EXON 19                | p11.2  | AG | 0.4524 | 1.544 | 0.0002353 |
| 15 | rs12592999 | 58975113  | RORA      | intron 10              | q22.2  | AG | 0.2977 | 0.611 | 0.0006927 |
| 1  | rs12409428 | 225256592 | CDC42BPA  | intron 2               | q42.13 | CT | 0.4836 | 1.508 | 0.0003723 |
| 3  | rs1546060  | 56410435  | CAST1     | intron 15              | p14.3  | AC | 0.6225 | 0.677 | 0.0009996 |
| 21 | rs16998550 | 40092123  | LOC150084 | intron 8               | q22.2  | CT | 0.0867 | 1.957 | 0.0003094 |
| 3  | rs9851360  | 56410015  | CAST1     | intron 15              | p14.3  | CT | 0.6236 | 0.674 | 0.0008676 |
| 9  | rs6475926  | 2668059   | VLDLR     | 23574 base downstream  | p24.2  | CT | 0.0734 | 1.993 | 0.000299  |
| 6  | rs4714357  | 40749271  | LRFN2     | 86167 base downstream  | p21.1  | AG | 0.7984 | 0.629 | 0.0006491 |
| 2  | rs843394   | 115904553 | DPP10     | intron 3               | q14.1  | GT | 0.0913 | 1.914 | 0.0001338 |
| 9  | rs1542358  | 2663393   | VLDLR     | 18908 base downstream  | p24.2  | CT | 0.9284 | 0.48  | 0.0002079 |
| 9  | rs7046015  | 2667787   | VLDLR     | 23302 base downstream  | p24.2  | AG | 0.9266 | 0.502 | 0.0002981 |
| 2  | rs4589732  | 38409334  | ARL6IP2   | intron 11              | p22.1  | CG | 0.6771 | 1.762 | 2.64E-05  |

|    |            |           |          |                        |        |    |        |       |           |
|----|------------|-----------|----------|------------------------|--------|----|--------|-------|-----------|
| 13 | rs12873354 | 39474064  | COG6     | 249432 base downstream | q13.3  | CT | 0.6402 | 0.641 | 0.0001497 |
| 6  | rs16893894 | 40749486  | LRFN2    | 86382 base downstream  | p21.1  | CT | 0.2016 | 1.589 | 0.0006503 |
| 3  | rs6805882  | 56414093  | CAST1    | intron 15              | p14.3  | CT | 0.3785 | 1.481 | 0.0009577 |
| 9  | rs7847455  | 2668427   | VLDLR    | 23942 base downstream  | p24.2  | AT | 0.9266 | 0.502 | 0.0002995 |
| 4  | rs7675336  | 74455492  | ALB      | 33377 base upstream    | q13.3  | AG | 0.9711 | 0.357 | 0.0002009 |
| 6  | rs1600619  | 136507868 | PDE7B    | intron 3               | q23.3  | AT | 0.4036 | 1.602 | 7.99E-05  |
| 3  | rs1491158  | 56411201  | CAST1    | intron 15              | p14.3  | AG | 0.3765 | 1.487 | 0.0008208 |
| 13 | rs7339164  | 39470053  | COG6     | 245421 base downstream | q13.3  | AG | 0.3602 | 1.567 | 0.000129  |
| 4  | rs16849293 | 74460813  | ALB      | 28056 base upstream    | q13.3  | AG | 0.9711 | 0.357 | 0.000201  |
| 8  | rs2701438  | 73175792  | TRPA1    | 25419 base downstream  | q13.3  | GT | 0.1938 | 1.617 | 0.0003257 |
| 9  | rs10756080 | 10647559  | PTPRD    | 45050 base downstream  | p23    | CT | 0.136  | 1.833 | 4.93E-05  |
| 6  | rs4896199  | 136507265 | PDE7B    | intron 3               | q23.3  | AC | 0.5966 | 0.625 | 8.28E-05  |
| 6  | rs4714358  | 40749374  | LRFN2    | 86270 base downstream  | p21.1  | AC | 0.2016 | 1.589 | 0.0006493 |
| 1  | rs10912878 | 173301266 | TNN      | 2350 base upstream     | q25.1  | AT | 0.729  | 0.579 | 1.77E-05  |
| 19 | rs10411220 | 37367247  | ZNF507   | 161145 base upstream   | q13.11 | AG | 0.3424 | 1.529 | 0.0002541 |
| 1  | rs12409660 | 173288830 | TNN      | 14786 base upstream    | q25.1  | CG | 0.2711 | 1.728 | 1.79E-05  |
| 19 | rs7260436  | 37368934  | ZNF507   | 159458 base upstream   | q13.11 | AC | 0.4834 | 1.551 | 0.0002469 |
| 14 | rs1698517  | 42258722  | LRFN5    | 815224 base downstream | q21.2  | CT | 0.0669 | 2.157 | 0.0002147 |
| 6  | rs7748159  | 136506228 | PDE7B    | intron 3               | q23.3  | GT | 0.4033 | 1.601 | 8.42E-05  |
| 1  | rs3856106  | 180321600 | ZNF648   | 24130 base downstream  | q25.3  | CT | 0.6199 | 1.713 | 0.000138  |
| 15 | rs12917513 | 52109020  | UNC13C   | intron 1               | q21.3  | AT | 0.8285 | 0.553 | 0.0001766 |
| 2  | rs843390   | 115891622 | DPP10    | intron 3               | q14.1  | CG | 0.0911 | 1.923 | 0.000116  |
| 9  | rs6475927  | 2668077   | VLDLR    | 23592 base downstream  | p24.2  | AG | 0.0734 | 1.993 | 0.0002995 |
| 4  | rs10020236 | 95497016  | PGDS     | 13966 base downstream  | q22.3  | AG | 0.3679 | 1.521 | 0.0005544 |
| 2  | rs843393   | 115890266 | DPP10    | intron 3               | q14.1  | AG | 0.091  | 1.924 | 0.0001166 |
| 9  | rs7859818  | 2664110   | VLDLR    | 19625 base downstream  | p24.2  | AG | 0.9266 | 0.499 | 0.0002721 |
| 15 | rs12595222 | 58093606  | FOXB1    | 8172 base downstream   | q22.2  | AG | 0.159  | 1.68  | 0.0004862 |
| 8  | rs2701437  | 73179080  | TRPA1    | 28707 base downstream  | q13.3  | AG | 0.8059 | 0.619 | 0.0003302 |
| 3  | rs11130518 | 56412896  | CAST1    | intron 15              | p14.3  | CT | 0.3782 | 1.48  | 0.0009687 |
| 9  | rs7874073  | 2664864   | VLDLR    | 20379 base downstream  | p24.2  | AG | 0.0735 | 1.999 | 0.0002799 |
| 6  | rs1600620  | 136507734 | PDE7B    | intron 3               | q23.3  | AT | 0.5965 | 0.624 | 8.17E-05  |
| 3  | rs1463524  | 176290623 | NAALADL2 | intron 1               | q26.31 | CT | 0.5775 | 1.493 | 0.0009639 |
| 1  | rs8179259  | 180318899 | ZNF648   | 21429 base downstream  | q25.3  | CG | 0.6206 | 1.717 | 0.0001487 |
| 1  | rs11586346 | 95633790  | RWDD3    | 148421 base downstream | p21.3  | AC | 0.9131 | 0.521 | 0.0001899 |
| 3  | rs2713775  | 102221017 | ABI3BP   | 26013 base downstream  | q12.2  | AT | 0.7095 | 0.617 | 8.30E-05  |
| 8  | rs4076071  | 26559908  | DPYSL2   | intron 10              | p21.2  | CT | 0.8764 | 2.2   | 0.0007815 |
| 3  | rs6445788  | 56418235  | CAST1    | intron 15              | p14.3  | CG | 0.3564 | 1.49  | 0.0009352 |



|    |            |           |          |                        |        |    |        |       |           |
|----|------------|-----------|----------|------------------------|--------|----|--------|-------|-----------|
| 1  | rs12743570 | 75106090  | C1orf171 | 102194 base downstream | p31.1  | CG | 0.2578 | 1.587 | 0.0003734 |
| 14 | rs11159275 | 77087999  | SPTLC2   | intron 3               | q24.3  | CT | 0.4608 | 1.566 | 0.0006741 |
| 15 | rs17237465 | 58977303  | RORA     | intron 10              | q22.2  | CT | 0.3022 | 0.62  | 0.0007618 |
| 6  | rs2170231  | 136508827 | PDE7B    | intron 3               | q23.3  | CT | 0.6015 | 0.623 | 7.40E-05  |
| 9  | rs4641116  | 10649290  | PTPRD    | 46781 base downstream  | p23    | CT | 0.864  | 0.546 | 4.95E-05  |
| 9  | rs10756088 | 10651370  | PTPRD    | 48861 base downstream  | p23    | AG | 0.8634 | 0.541 | 5.17E-05  |
| 13 | rs9546775  | 84064321  | SLITRK1  | 709792 base downstream | q31.1  | GT | 0.1306 | 1.648 | 0.0009609 |
| 9  | rs11793970 | 2665728   | VLDLR    | 21243 base downstream  | p24.2  | CG | 0.0735 | 1.996 | 0.0002901 |
| 1  | rs7552148  | 75112763  | C1orf171 | 108867 base downstream | p31.1  | CT | 0.742  | 0.631 | 0.0003738 |
| 9  | rs7030381  | 10651622  | PTPRD    | 49113 base downstream  | p23    | AG | 0.1367 | 1.849 | 5.19E-05  |
| 16 | rs4583255  | 29896442  | TAOK2    | intron 1               | p11.2  | AG | 0.5461 | 0.651 | 0.0002902 |
| 3  | rs1546061  | 56410482  | CAST1    | intron 15              | p14.3  | CG | 0.3777 | 1.478 | 0.0009881 |
| 9  | rs7030672  | 10651798  | PTPRD    | 49289 base downstream  | p23    | CG | 0.1369 | 1.853 | 5.28E-05  |
| 8  | rs1544980  | 10715391  | PINX1    | intron 2               | p23.1  | CT | 0.2004 | 0.546 | 0.0003709 |
| 2  | rs1402446  | 115885861 | DPP10    | intron 3               | q14.1  | AG | 0.9096 | 0.518 | 0.0001358 |
| 10 | rs11002926 | 80752296  | RAI17    | 6017 base downstream   | q22.3  | AC | 0.7334 | 1.744 | 0.0003935 |
| 9  | rs4587381  | 10647075  | PTPRD    | 44566 base downstream  | p23    | GT | 0.1361 | 1.831 | 5.09E-05  |
| 13 | rs9575636  | 84142066  | SLITRK1  | 787537 base downstream | q31.1  | AG | 0.119  | 1.686 | 0.0007148 |
| 9  | rs7034568  | 10652358  | PTPRD    | 49849 base downstream  | p23    | CT | 0.1373 | 1.861 | 5.44E-05  |
| 2  | rs1717040  | 115885270 | DPP10    | intron 3               | q14.1  | CT | 0.0904 | 1.93  | 0.0001371 |
| 3  | rs6763636  | 56415469  | CAST1    | intron 15              | p14.3  | GT | 0.381  | 1.489 | 0.0008714 |
| 4  | rs6535914  | 154482001 | TRIM2    | 2083 base downstream   | q31.3  | CT | 0.3633 | 1.662 | 0.0001162 |
| 8  | rs1469557  | 10744211  | PINX1    | 9502 base downstream   | p23.1  | CT | 0.7945 | 1.915 | 0.0001281 |
| 13 | rs7319590  | 84181912  | SLITRK1  | 827383 base downstream | q31.1  | CT | 0.1147 | 1.737 | 0.0004612 |
| 1  | rs6693535  | 225264308 | CDC42BPA | intron 3               | q42.13 | AG | 0.491  | 1.517 | 0.0003494 |
| 9  | rs7029311  | 2667743   | VLDLR    | 23258 base downstream  | p24.2  | AG | 0.0734 | 1.994 | 0.0002973 |
| 3  | rs11130520 | 56416159  | CAST1    | intron 15              | p14.3  | GT | 0.3812 | 1.49  | 0.0008646 |
| 9  | rs2890924  | 10622596  | PTPRD    | 20087 base downstream  | p23    | GT | 0.8541 | 0.567 | 0.0001375 |
| 9  | rs7019756  | 10652166  | PTPRD    | 49657 base downstream  | p23    | CT | 0.8628 | 0.538 | 5.42E-05  |
| 13 | rs9514322  | 104282823 | DAOA     | 633541 base upstream   | q33.2  | CT | 0.6023 | 0.649 | 0.0003615 |
| 15 | rs3803487  | 58976901  | RORA     | intron 10              | q22.2  | AG | 0.3022 | 0.62  | 0.0007589 |
| 4  | rs13110782 | 187045575 | SORBS2   | intron 20              | q35.1  | AG | 0.4215 | 0.657 | 0.0008475 |
| 1  | rs10890086 | 74134374  | LRRC44   | 129915 base upstream   | p31.1  | AC | 0.5271 | 0.635 | 0.0001216 |
| 5  | rs10068181 | 105642920 | EFNA5    | 1101329 base upstream  | q21.3  | AG | 0.1559 | 1.784 | 7.69E-05  |
| 14 | rs1712699  | 42258562  | LRFN5    | 815064 base downstream | q21.2  | AC | 0.9267 | 0.492 | 0.0002635 |
| 9  | rs4262363  | 10654367  | PTPRD    | 51858 base downstream  | p23    | AG | 0.1377 | 1.87  | 5.63E-05  |
| 1  | rs1194596  | 152505007 | UBAP2L   | intron 23              | q21.3  | AG | 0.4704 | 0.671 | 0.0008161 |

|    |            |           |          |                        |        |    |        |       |           |
|----|------------|-----------|----------|------------------------|--------|----|--------|-------|-----------|
| 9  | rs4578000  | 10647332  | PTPRD    | 44823 base downstream  | p23    | AG | 0.8639 | 0.546 | 5.06E-05  |
| 15 | rs12592976 | 81227450  | FSD2     | intron 1               | q25.2  | CT | 0.1178 | 0.467 | 0.0009505 |
| 1  | rs17113478 | 95634310  | RWDD3    | 148941 base downstream | p21.3  | CG | 0.9131 | 0.522 | 0.0001912 |
| 4  | rs7659326  | 92459702  | TMSL3    | 480410 base downstream | q22.1  | AT | 0.2572 | 0.528 | 8.29E-05  |
| 9  | rs7045753  | 10658198  | PTPRD    | 55689 base downstream  | p23    | CT | 0.8612 | 0.528 | 6.30E-05  |
| 9  | rs10756079 | 10646211  | PTPRD    | 43702 base downstream  | p23    | CT | 0.1364 | 1.828 | 5.34E-05  |
| 9  | rs7029840  | 2667429   | VLDLR    | 22944 base downstream  | p24.2  | AC | 0.0734 | 1.994 | 0.0002965 |
| 8  | rs11986722 | 127597922 | FAM84B   | 35946 base upstream    | q24.21 | CG | 0.893  | 0.569 | 0.0006072 |
| 9  | rs4272438  | 10655040  | PTPRD    | 52531 base downstream  | p23    | AT | 0.8619 | 0.532 | 5.84E-05  |
| 5  | rs13185419 | 105650965 | EFNA5    | 1093284 base upstream  | q21.3  | AC | 0.8437 | 0.559 | 7.68E-05  |
| 1  | rs11210366 | 74140143  | LRRC44   | 124146 base upstream   | p31.1  | CT | 0.5575 | 0.613 | 7.11E-05  |
| 16 | rs4788209  | 29920767  | FLJ90652 | intron 6               | p11.2  | CT | 0.5542 | 0.649 | 0.0002986 |
| 9  | rs10756092 | 10654583  | PTPRD    | 52074 base downstream  | p23    | AC | 0.862  | 0.532 | 5.85E-05  |
| 13 | rs12561049 | 89050456  | GPC5     | 1798431 base upstream  | q31.3  | AG | 0.0267 | 2.81  | 0.0002557 |
| 8  | rs2587578  | 73172159  | TRPA1    | 21786 base downstream  | q13.3  | AG | 0.1919 | 1.615 | 0.0003183 |
| 16 | rs4788204  | 29902719  | TAOK2    | intron 13              | p11.2  | AG | 0.4539 | 1.536 | 0.0002877 |
| 1  | rs10890092 | 74174906  | LRRC44   | 89383 base upstream    | p31.1  | CT | 0.4719 | 1.578 | 0.0001092 |
| 1  | rs12121720 | 75159525  | C1orf171 | 155629 base downstream | p31.1  | AG | 0.2694 | 1.541 | 0.0005993 |
| 3  | rs9880091  | 56416835  | CAST1    | intron 15              | p14.3  | CT | 0.3554 | 1.488 | 0.0009532 |
| 5  | rs13185392 | 105650703 | EFNA5    | 1093546 base upstream  | q21.3  | CT | 0.1563 | 1.788 | 7.63E-05  |
| 5  | rs6452297  | 25914456  | CDH9     | 1002009 base upstream  | p14.1  | CT | 0.3411 | 1.596 | 0.0001491 |
| 13 | rs9634611  | 89054175  | GPC5     | 1794712 base upstream  | q31.3  | GT | 0.9733 | 0.356 | 0.0002507 |
| 18 | rs12960420 | 20409134  | HRH4     | 95216 base downstream  | q11.2  | CT | 0.6619 | 1.547 | 0.000984  |
| 9  | rs10756076 | 10645642  | PTPRD    | 43133 base downstream  | p23    | AG | 0.1365 | 1.827 | 5.42E-05  |
| 6  | rs210051   | 90708821  | BACH2    | intron 2               | q15    | AG | 0.6803 | 1.618 | 0.0003449 |
| 10 | rs11593579 | 36687776  | FZD8     | 717408 base downstream | p11.21 | AG | 0.1146 | 1.806 | 0.0001818 |
| 1  | rs11165434 | 95758927  | RWDD3    | 273558 base downstream | p21.3  | GT | 0.9131 | 0.537 | 0.000404  |
| 20 | rs6056491  | 925164    | RSPO4    | intron 4               | p13    | AG | 0.9386 | 0.456 | 0.0001557 |
| 7  | rs760226   | 152433153 | ACTR3B   | 249757 base downstream | q36.2  | AG | 0.6543 | 1.654 | 0.000196  |
| 16 | rs4787489  | 29903381  | TAOK2    | intron 13              | p11.2  | AG | 0.4538 | 1.536 | 0.0002864 |
| 1  | rs12135050 | 95765051  | RWDD3    | 279682 base downstream | p21.3  | AG | 0.0868 | 1.877 | 0.0004256 |
| 1  | rs12118601 | 88293965  | PKN2     | 628544 base upstream   | p22.2  | CT | 0.6626 | 1.681 | 0.0001243 |
| 3  | rs9817231  | 56416017  | CAST1    | intron 15              | p14.3  | AT | 0.6189 | 0.671 | 0.0008671 |
| 20 | rs6055881  | 8455713   | PLCB1    | intron 3               | p12.3  | CT | 0.6108 | 1.666 | 8.80E-05  |
| 9  | rs10809147 | 10645366  | PTPRD    | 42857 base downstream  | p23    | CT | 0.8633 | 0.548 | 5.62E-05  |
| 1  | rs17600725 | 225270854 | CDC42BPA | intron 4               | q42.13 | AG | 0.5191 | 0.674 | 0.0006899 |
| 2  | rs7581748  | 115905074 | DPP10    | intron 3               | q14.1  | AT | 0.9055 | 0.533 | 0.000206  |

|    |            |           |           |                         |        |    |        |       |           |
|----|------------|-----------|-----------|-------------------------|--------|----|--------|-------|-----------|
| 8  | rs1896238  | 112148387 | KCNV1     | 1092252 base downstream | q23.2  | AG | 0.2755 | 0.583 | 0.0003723 |
| 6  | rs9387353  | 116094037 | FRK       | 275349 base upstream    | q22.1  | CT | 0.7847 | 0.627 | 0.000484  |
| 5  | rs7728507  | 153738544 | GALNT10   | intron 5                | q33.2  | CT | 0.7111 | 1.8   | 7.50E-05  |
| 5  | rs1422665  | 153737245 | GALNT10   | intron 5                | q33.2  | CT | 0.7089 | 1.801 | 7.61E-05  |
| 5  | rs1428660  | 25917816  | CDH9      | 998649 base upstream    | p14.1  | CT | 0.6592 | 0.629 | 0.0001548 |
| 13 | rs9575638  | 84147159  | SLITRK1   | 792630 base downstream  | q31.1  | GT | 0.8807 | 0.594 | 0.000705  |
| 2  | rs875653   | 38366026  | ARL6IP2   | 10601 base upstream     | p22.2  | CT | 0.8352 | 2.018 | 0.0002985 |
| 1  | rs4650235  | 74143228  | LRRC44    | 121061 base upstream    | p31.1  | AG | 0.4815 | 1.602 | 9.50E-05  |
| 4  | rs2319750  | 52565714  | LOC339977 | intron 3                | q12    | CT | 0.1497 | 0.513 | 0.0007543 |
| 9  | rs10809145 | 10645189  | PTPRD     | 42680 base downstream   | p23    | AG | 0.1367 | 1.825 | 5.66E-05  |
| 1  | rs6664850  | 75124915  | C1orf171  | 121019 base downstream  | p31.1  | AG | 0.2674 | 1.539 | 0.0006167 |
| 8  | rs4733048  | 26555006  | DPYSL2    | intron 8                | p21.2  | CT | 0.1228 | 0.457 | 0.000829  |
| 4  | rs4336191  | 74419872  | ALB       | 68997 base upstream     | q13.3  | CT | 0.0276 | 2.737 | 0.0003229 |
| 3  | rs7627996  | 176301721 | NAALADL2  | intron 2                | q26.31 | CT | 0.6069 | 1.532 | 0.0005387 |
| 16 | rs4283241  | 29895850  | TAOK2     | intron 1                | p11.2  | AG | 0.4539 | 1.536 | 0.0002908 |
| 13 | rs9319065  | 84157238  | SLITRK1   | 802709 base downstream  | q31.1  | AG | 0.8807 | 0.594 | 0.0007027 |
| 5  | rs17116042 | 153740522 | GALNT10   | intron 6                | q33.2  | CT | 0.2906 | 0.555 | 7.24E-05  |
| 13 | rs12100200 | 84143232  | SLITRK1   | 788703 base downstream  | q31.1  | AG | 0.1193 | 1.682 | 0.000725  |
| 1  | rs1760802  | 152525899 | HAX1      | 10926 base downstream   | q21.3  | CG | 0.4701 | 0.665 | 0.0007681 |
| 14 | rs17633001 | 42261110  | LRFN5     | 817612 base downstream  | q21.2  | AG | 0.929  | 0.476 | 0.000336  |
| 1  | rs17600669 | 225268494 | CDC42BPA  | intron 3                | q42.13 | AG | 0.519  | 0.673 | 0.000655  |
| 1  | rs1044013  | 152509739 | UBAP2L    | EXON 26                 | q21.3  | CT | 0.4703 | 0.668 | 0.0007783 |
| 4  | rs13123243 | 116420192 | NDST4     | 165711 base downstream  | q26    | AT | 0.3902 | 1.594 | 7.39E-05  |
| 1  | rs1194593  | 152512136 | HAX1      | intron 1                | q21.3  | AG | 0.4702 | 0.666 | 0.0007677 |
| 16 | rs2075157  | 45321875  | MLCK      | intron 8                | q11.2  | CT | 0.8581 | 0.58  | 0.0004669 |
| 13 | rs7994475  | 89055707  | GPC5      | 1793180 base upstream   | q31.3  | AG | 0.0267 | 2.806 | 0.0002488 |
| 1  | rs10798331 | 173301060 | TNN       | 2556 base upstream      | q25.1  | AG | 0.3457 | 1.63  | 4.63E-05  |
| 4  | rs6816636  | 92459915  | TMSL3     | 480623 base downstream  | q22.1  | AC | 0.7424 | 1.887 | 8.27E-05  |
| 13 | rs1326452  | 104282736 | DAOA      | 633628 base upstream    | q33.2  | AG | 0.4146 | 1.546 | 0.0002203 |
| 12 | rs1354486  | 97094459  | TMPO      | 339080 base upstream    | q23.1  | AG | 0.3016 | 0.6   | 0.0008662 |
| 16 | rs9925915  | 29901187  | TAOK2     | intron 10               | p11.2  | CG | 0.4539 | 1.536 | 0.0002893 |
| 4  | rs6813599  | 116426743 | NDST4     | 172262 base downstream  | q26    | AT | 0.6098 | 0.629 | 7.62E-05  |
| 7  | rs12672384 | 26559015  | SCAP2     | 114199 base upstream    | p15.2  | CT | 0.2133 | 1.618 | 0.0002368 |
| 1  | rs1340447  | 74176368  | LRRC44    | 87921 base upstream     | p31.1  | AC | 0.5278 | 0.634 | 0.0001087 |
| 6  | rs3846739  | 80193185  | C6orf152  | 58242 base upstream     | q14.1  | AG | 0.1231 | 1.716 | 0.0004084 |
| 7  | rs13224424 | 97318328  | ASNS      | 1048 base upstream      | q21.3  | CT | 0.132  | 1.732 | 0.0002415 |
| 13 | rs9565956  | 84121490  | SLITRK1   | 766961 base downstream  | q31.1  | CT | 0.1118 | 1.723 | 0.0006758 |

|    |            |           |           |                        |        |    |        |       |           |
|----|------------|-----------|-----------|------------------------|--------|----|--------|-------|-----------|
| 1  | rs6424568  | 74212970  | LRRC44    | 51319 base upstream    | p31.1  | AG | 0.5172 | 0.617 | 6.52E-05  |
| 4  | rs7676815  | 116469038 | NDST4     | 214557 base downstream | q26    | CT | 0.3897 | 1.573 | 8.89E-05  |
| 4  | rs6533855  | 116473561 | NDST4     | 219080 base downstream | q26    | AG | 0.3897 | 1.573 | 8.89E-05  |
| 1  | rs17562236 | 75146613  | C1orf171  | 142717 base downstream | p31.1  | AG | 0.7319 | 0.652 | 0.0006145 |
| 5  | rs6891526  | 105644816 | EFNA5     | 1099433 base upstream  | q21.3  | AG | 0.1943 | 1.688 | 0.0001594 |
| 1  | rs12755578 | 75147442  | C1orf171  | 143546 base downstream | p31.1  | CG | 0.7319 | 0.651 | 0.000614  |
| 4  | rs7439118  | 116481902 | NDST4     | 227421 base downstream | q26    | CT | 0.3897 | 1.573 | 8.89E-05  |
| 16 | rs7204797  | 29875516  | LOC124446 | 5335 base upstream     | p11.2  | CT | 0.5458 | 0.655 | 0.0003558 |
| 1  | rs2733267  | 74177642  | LRRC44    | 86647 base upstream    | p31.1  | AG | 0.5277 | 0.633 | 0.0001086 |
| 4  | rs12503088 | 116491650 | NDST4     | 237169 base downstream | q26    | CG | 0.6104 | 0.636 | 8.88E-05  |
| 13 | rs7997861  | 104283297 | DAOA      | 633067 base upstream   | q33.2  | CT | 0.4149 | 1.547 | 0.0002269 |
| 8  | rs11990167 | 10741808  | PINX1     | 7099 base downstream   | p23.1  | CT | 0.7967 | 1.881 | 0.000187  |
| 7  | rs10486010 | 97316254  | ASNS      | 3122 base upstream     | q21.3  | CT | 0.132  | 1.731 | 0.0002396 |
| 6  | rs12205135 | 116092185 | FRK       | 277201 base upstream   | q22.1  | CG | 0.215  | 1.596 | 0.0004907 |
| 1  | rs12127639 | 75167786  | C1orf171  | 163890 base downstream | p31.1  | CG | 0.7306 | 0.649 | 0.0006013 |
| 1  | rs2733262  | 74169484  | LRRC44    | 94805 base upstream    | p31.1  | CT | 0.5275 | 0.638 | 0.0001358 |
| 8  | rs7010709  | 10739369  | PINX1     | 4660 base downstream   | p23.1  | CT | 0.2032 | 0.534 | 0.0001974 |
| 7  | rs10486011 | 97319748  | ASNS      | intron 1               | q21.3  | CT | 0.8682 | 0.577 | 0.0002448 |
| 4  | rs4349617  | 116465817 | NDST4     | 211336 base downstream | q26    | CT | 0.6103 | 0.636 | 8.88E-05  |
| 16 | rs11150577 | 29894026  | TAOK2     | intron 1               | p11.2  | AG | 0.454  | 1.534 | 0.0003047 |
| 4  | rs4694161  | 74413190  | ANKRD17   | 69824 base downstream  | q13.3  | AG | 0.0275 | 2.721 | 0.0003445 |
| 11 | rs12222200 | 19040692  | MRGPRX2   | 1888 base downstream   | p15.1  | CT | 0.6274 | 0.666 | 0.0009916 |
| 4  | rs4519812  | 116466112 | NDST4     | 211631 base downstream | q26    | AG | 0.6103 | 0.636 | 8.88E-05  |
| 9  | rs1322300  | 10625232  | PTPRD     | 22723 base downstream  | p23    | CT | 0.2401 | 1.57  | 0.0003158 |
| 4  | rs4274815  | 74418309  | ALB       | 70560 base upstream    | q13.3  | AT | 0.0276 | 2.73  | 0.0003319 |
| 9  | rs7031441  | 2673052   | VLDLR     | 28567 base downstream  | p24.2  | CG | 0.0991 | 1.908 | 0.000124  |
| 8  | rs17152571 | 10720187  | PINX1     | intron 2               | p23.1  | AG | 0.1311 | 0.418 | 0.0001039 |
| 11 | rs1714336  | 15201694  | INSC      | intron 8               | p15.2  | CT | 0.5971 | 0.669 | 0.0005477 |
| 16 | rs4318227  | 29892340  | TAOK2     | 382 base upstream      | p11.2  | CG | 0.546  | 0.652 | 0.0003076 |
| 1  | rs2733265  | 74175716  | LRRC44    | 88573 base upstream    | p31.1  | CG | 0.5278 | 0.634 | 0.0001088 |
| 11 | rs4755236  | 44205402  | EXT2      | intron 12              | p11.2  | CG | 0.6341 | 0.667 | 0.0004737 |
| 16 | rs11247495 | 45361965  | MLCK      | 22243 base downstream  | q11.2  | CT | 0.8528 | 0.568 | 0.0003604 |
| 13 | rs7139884  | 104283684 | DAOA      | 632680 base upstream   | q33.2  | AC | 0.4151 | 1.549 | 0.0002328 |
| 4  | rs4345145  | 74420504  | ALB       | 68365 base upstream    | q13.3  | CT | 0.9722 | 0.363 | 0.0002957 |
| 10 | rs11199661 | 122679558 | BRWD2     | 20533 base downstream  | q26.12 | AG | 0.0193 | 3.413 | 0.0001232 |
| 13 | rs7322623  | 39454803  | COG6      | 230171 base downstream | q13.3  | AC | 0.3539 | 1.568 | 0.0002029 |
| 8  | rs6990589  | 10739944  | PINX1     | 5235 base downstream   | p23.1  | AG | 0.2029 | 0.534 | 0.0002027 |

|    |            |           |          |                        |        |    |        |       |           |
|----|------------|-----------|----------|------------------------|--------|----|--------|-------|-----------|
| 10 | rs7897007  | 24661175  | KIAA1217 | intron 3               | p12.1  | AG | 0.8217 | 0.584 | 0.0001035 |
| 1  | rs10782637 | 75176175  | C1orf171 | 172279 base downstream | p31.1  | AC | 0.7307 | 0.649 | 0.0006105 |
| 7  | rs10486009 | 97316047  | ASNS     | 3329 base upstream     | q21.3  | CG | 0.8679 | 0.578 | 0.0002381 |
| 4  | rs6446922  | 74415477  | ANKRD17  | 72111 base downstream  | q13.3  | AG | 0.9724 | 0.367 | 0.0003384 |
| 1  | rs881713   | 95757654  | RWDD3    | 272285 base downstream | p21.3  | AG | 0.0869 | 1.86  | 0.0004031 |
| 10 | rs12359177 | 122678184 | BRWD2    | 19159 base downstream  | q26.12 | AG | 0.0193 | 3.42  | 0.000121  |
| 3  | rs1282931  | 113073512 | PHLDB2   | 11987 base upstream    | q13.2  | AT | 0.3289 | 1.512 | 0.0009784 |
| 10 | rs12357022 | 122680429 | BRWD2    | 21404 base downstream  | q26.12 | AG | 0.9807 | 0.293 | 0.0001246 |
| 10 | rs11199663 | 122682094 | BRWD2    | 23069 base downstream  | q26.12 | AG | 0.0194 | 3.405 | 0.000126  |
| 4  | rs1948983  | 116464246 | NDST4    | 209765 base downstream | q26    | CG | 0.6103 | 0.636 | 8.88E-05  |
| 4  | rs4834466  | 116483034 | NDST4    | 228553 base downstream | q26    | CG | 0.3897 | 1.573 | 8.89E-05  |
| 10 | rs11199660 | 122679402 | BRWD2    | 20377 base downstream  | q26.12 | AG | 0.0193 | 3.418 | 0.0001217 |
| 9  | rs10756072 | 10625939  | PTPRD    | 23430 base downstream  | p23    | AG | 0.7599 | 0.636 | 0.0003077 |
| 2  | rs10496495 | 115959914 | DPP10    | intron 3               | q14.1  | CT | 0.091  | 1.868 | 0.000242  |
| 13 | rs9602525  | 84114641  | SLITRK1  | 760112 base downstream | q31.1  | AT | 0.1102 | 1.719 | 0.0007262 |
| 1  | rs3795453  | 225271954 | CDC42BPA | intron 5               | q42.13 | CT | 0.4797 | 1.465 | 0.0009705 |
| 8  | rs2701444  | 73172073  | TRPA1    | 21700 base downstream  | q13.3  | CT | 0.8081 | 0.619 | 0.0003189 |
| 6  | rs9405506  | 1653870   | GMDS     | intron 2               | p25.3  | CT | 0.2307 | 1.648 | 0.0001819 |
| 4  | rs6446920  | 74412327  | ANKRD17  | 68961 base downstream  | q13.3  | CT | 0.0275 | 2.724 | 0.0003474 |
| 18 | rs2587642  | 37343203  | PIK3C3   | 445993 base upstream   | q12.3  | CT | 0.3696 | 1.555 | 0.000201  |
| 13 | rs9567450  | 44106744  | TSC22D1  | 58043 base downstream  | q14.11 | CT | 0.639  | 1.581 | 0.0003355 |
| 10 | rs11199659 | 122678943 | BRWD2    | 19918 base downstream  | q26.12 | AT | 0.0193 | 3.42  | 0.0001211 |
| 4  | rs6829587  | 116486031 | NDST4    | 231550 base downstream | q26    | CT | 0.3897 | 1.572 | 8.98E-05  |
| 8  | rs7819694  | 4080287   | CSMD1    | intron 67              | p23.2  | CT | 0.0411 | 2.534 | 0.0001302 |
| 13 | rs13378761 | 84112297  | SLITRK1  | 757768 base downstream | q31.1  | AC | 0.1101 | 1.719 | 0.0007311 |
| 10 | rs7092964  | 128737210 | DOCK1    | intron 21              | q26.2  | CT | 0.9159 | 0.556 | 0.0009566 |
| 4  | rs4408930  | 74419733  | ALB      | 69136 base upstream    | q13.3  | AG | 0.0276 | 2.735 | 0.0003258 |
| 1  | rs12747472 | 75084050  | C1orf171 | 80154 base downstream  | p31.1  | CT | 0.2902 | 1.573 | 0.0005066 |
| 1  | rs17479604 | 108005170 | VAV3     | intron 8               | p13.3  | AC | 0.1372 | 1.654 | 0.0006977 |
| 10 | rs10741051 | 24662335  | KIAA1217 | intron 3               | p12.1  | AG | 0.1782 | 1.709 | 0.0001054 |
| 3  | rs1495693  | 41535096  | ULK4     | intron 5               | p22.1  | CT | 0.0609 | 1.977 | 0.0007539 |
| 7  | rs672366   | 152434353 | ACTR3B   | 250957 base downstream | q36.2  | CG | 0.3148 | 0.593 | 0.0002327 |
| 19 | rs7260548  | 37369022  | ZNF507   | 159370 base upstream   | q13.11 | CT | 0.5132 | 0.656 | 0.0004333 |
| 1  | rs4465211  | 219585205 | DUSP10   | 356183 base upstream   | q41    | AG | 0.3607 | 1.524 | 0.0004758 |
| 1  | rs10863604 | 219588044 | DUSP10   | 353344 base upstream   | q41    | CG | 0.3608 | 1.525 | 0.0004726 |
| 4  | rs13101335 | 116474793 | NDST4    | 220312 base downstream | q26    | GT | 0.3897 | 1.573 | 8.89E-05  |
| 8  | rs17152584 | 10723261  | PINX1    | intron 3               | p23.1  | AG | 0.1315 | 0.418 | 0.0001025 |

|    |            |           |           |                        |        |    |        |       |           |
|----|------------|-----------|-----------|------------------------|--------|----|--------|-------|-----------|
| 8  | rs6995541  | 10708670  | PINX1     | intron 1               | p23.1  | AG | 0.6961 | 1.606 | 0.0009987 |
| 20 | rs17782078 | 3489382   | ATRN      | EXON 8                 | p13    | CT | 0.0498 | 2.071 | 0.0009643 |
| 1  | rs7537211  | 180325179 | ZNF648    | 27709 base downstream  | q25.3  | AG | 0.613  | 1.637 | 0.0002781 |
| 1  | rs12129191 | 75167915  | C1orf171  | 164019 base downstream | p31.1  | AG | 0.7306 | 0.649 | 0.0006025 |
| 7  | rs6966699  | 97314777  | ASNS      | 4599 base upstream     | q21.3  | CT | 0.8674 | 0.579 | 0.0002297 |
| 1  | rs12732265 | 75170858  | C1orf171  | 166962 base downstream | p31.1  | CT | 0.2694 | 1.541 | 0.0006031 |
| 1  | rs6671621  | 219584095 | DUSP10    | 357293 base upstream   | q41    | CG | 0.3607 | 1.524 | 0.0004795 |
| 11 | rs12364403 | 106336866 | GUCY1A2   | intron 5               | q22.3  | CT | 0.2479 | 0.581 | 0.0007451 |
| 5  | rs6883970  | 105632419 | EFNA5     | 1111830 base upstream  | q21.3  | CT | 0.807  | 0.598 | 0.000191  |
| 1  | rs6693646  | 75238998  | LHX8      | 127708 base upstream   | p31.1  | GT | 0.2769 | 1.554 | 0.000425  |
| 8  | rs11250082 | 10741204  | PINX1     | 6495 base downstream   | p23.1  | CT | 0.7971 | 1.872 | 0.0002038 |
| 10 | rs12355094 | 122688268 | BRWD2     | 29243 base downstream  | q26.12 | CT | 0.9804 | 0.298 | 0.0001406 |
| 3  | rs1913494  | 113072652 | PHLDB2    | 12847 base upstream    | q13.2  | AG | 0.6711 | 0.661 | 0.0009518 |
| 6  | rs182382   | 90704480  | BACH2     | intron 1               | q15    | CG | 0.6805 | 1.597 | 0.0004528 |
| 16 | rs4787486  | 29885063  | LOC124446 | intron 3               | p11.2  | AT | 0.5458 | 0.654 | 0.0003442 |
| 3  | rs17040733 | 15109324  | ZFYVE20   | intron 10              | p24.3  | CG | 0.9566 | 0.422 | 0.000111  |
| 1  | rs12136757 | 95769656  | RWDD3     | 284287 base downstream | p21.3  | CT | 0.0868 | 1.882 | 0.0004422 |
| 16 | rs6565173  | 29881668  | LOC124446 | intron 1               | p11.2  | AG | 0.4542 | 1.528 | 0.0003471 |
| 7  | rs498474   | 152436044 | ACTR3B    | 252648 base downstream | q36.2  | AG | 0.3144 | 0.593 | 0.0002324 |
| 4  | rs6533852  | 116461695 | NDST4     | 207214 base downstream | q26    | GT | 0.6103 | 0.636 | 8.88E-05  |
| 16 | rs11901    | 29891571  | LOC124446 | intron 5               | p11.2  | CG | 0.5459 | 0.654 | 0.0003407 |
| 20 | rs17370440 | 19711787  | SLC24A3   | 60247 base downstream  | p11.23 | AT | 0.1058 | 1.885 | 0.0001313 |
| 7  | rs496724   | 152435872 | ACTR3B    | 252476 base downstream | q36.2  | AG | 0.6855 | 1.687 | 0.0002325 |
| 11 | rs1714337  | 15203462  | INSC      | intron 8               | p15.2  | AG | 0.5972 | 0.669 | 0.0005645 |
| 8  | rs2701445  | 73171999  | TRPA1     | 21626 base downstream  | q13.3  | GT | 0.1919 | 1.615 | 0.0003191 |
| 5  | rs2116732  | 159147091 | ADRA1B    | 129226 base upstream   | q33.3  | AG | 0.0135 | 3.438 | 0.0008476 |
| 13 | rs9519488  | 104284523 | DAOA      | 631841 base upstream   | q33.2  | AT | 0.5838 | 0.643 | 0.0002599 |
| 6  | rs292250   | 90703875  | BACH2     | intron 1               | q15    | AG | 0.6805 | 1.597 | 0.0004534 |
| 3  | rs1565960  | 41542696  | ULK4      | intron 5               | p22.1  | AG | 0.0608 | 1.977 | 0.0007479 |
| 6  | rs9357865  | 55494436  | HMGCLL1   | intron 6               | p12.1  | AG | 0.8803 | 0.55  | 0.0007631 |
| 13 | rs9560417  | 89159717  | GPC5      | 1689170 base upstream  | q31.3  | AG | 0.9732 | 0.366 | 0.0002361 |
| 3  | rs931461   | 56421736  | CAST1     | intron 15              | p14.3  | GT | 0.3602 | 1.49  | 0.0009195 |
| 7  | rs594243   | 152436388 | ACTR3B    | 252992 base downstream | q36.2  | CT | 0.6866 | 1.686 | 0.0002337 |
| 7  | rs593874   | 152436337 | ACTR3B    | 252941 base downstream | q36.2  | AG | 0.6865 | 1.686 | 0.0002334 |
| 3  | rs13318013 | 15120491  | ZFYVE20   | 4832 base downstream   | p24.3  | AG | 0.0453 | 2.298 | 0.0001806 |
| 6  | rs2046092  | 136500931 | PDE7B     | intron 3               | q23.3  | AG | 0.6049 | 0.635 | 0.000171  |
| 1  | rs2346344  | 75219251  | LHX8      | 147455 base upstream   | p31.1  | GT | 0.7231 | 0.643 | 0.0004275 |

|    |            |           |         |                        |        |    |        |       |           |
|----|------------|-----------|---------|------------------------|--------|----|--------|-------|-----------|
| 13 | rs1409470  | 104284951 | DAOA    | 631413 base upstream   | q33.2  | AG | 0.5837 | 0.643 | 0.0002629 |
| 7  | rs593793   | 152436277 | ACTR3B  | 252881 base downstream | q36.2  | AG | 0.3135 | 0.593 | 0.000234  |
| 3  | rs1795312  | 41535386  | ULK4    | intron 5               | p22.1  | AT | 0.0609 | 1.977 | 0.0007529 |
| 1  | rs2789706  | 74186512  | LRRC44  | 77777 base upstream    | p31.1  | CT | 0.5268 | 0.63  | 9.38E-05  |
| 1  | rs12565220 | 61295468  | NFIA    | 25414 base upstream    | p31.3  | CT | 0.8928 | 0.555 | 0.0009018 |
| 3  | rs13326820 | 15097982  | ZFYVE20 | intron 5               | p24.3  | AG | 0.9556 | 0.43  | 0.000147  |
| 11 | rs3925045  | 131494847 | HNT     | intron 2               | q25    | CG | 0.8249 | 1.911 | 0.000433  |
| 6  | rs9374564  | 116121301 | FRK     | 248085 base upstream   | q22.1  | CT | 0.7799 | 0.643 | 0.000738  |
| 9  | rs10738172 | 10624079  | PTPRD   | 21570 base downstream  | p23    | AG | 0.2416 | 1.558 | 0.0003849 |
| 6  | rs292251   | 90702947  | BACH2   | intron 1               | q15    | AG | 0.6805 | 1.598 | 0.0004617 |
| 1  | rs1340424  | 74160464  | LRRC44  | 103825 base upstream   | p31.1  | CG | 0.4741 | 1.561 | 0.0001561 |
| 6  | rs2046091  | 136500942 | PDE7B   | intron 3               | q23.3  | AG | 0.6049 | 0.635 | 0.0001701 |
| 3  | rs9867224  | 15125801  | ZFYVE20 | 10142 base downstream  | p24.3  | AG | 0.9546 | 0.438 | 0.0001965 |
| 1  | rs10863605 | 219590026 | DUSP10  | 351362 base upstream   | q41    | AG | 0.3477 | 1.55  | 0.0004577 |
| 1  | rs12402756 | 61296851  | NFIA    | 24031 base upstream    | p31.3  | CT | 0.1072 | 1.802 | 0.000903  |
| 19 | rs12611033 | 61166048  | NALP8   | intron 4               | q13.42 | AG | 0.1607 | 0.468 | 0.0001767 |
| 4  | rs6821637  | 116484342 | NDST4   | 229861 base downstream | q26    | GT | 0.3897 | 1.573 | 8.91E-05  |
| 4  | rs4464590  | 116435600 | NDST4   | 181119 base downstream | q26    | CT | 0.3898 | 1.572 | 9.16E-05  |
| 9  | rs7851410  | 133647911 | RAPGEF1 | 45165 base downstream  | q34.13 | CT | 0.2951 | 1.634 | 0.0001621 |
| 1  | rs10922574 | 89361971  | GBP2    | intron 10              | p22.2  | CT | 0.1825 | 0.544 | 0.0006533 |
| 1  | rs12141480 | 95771471  | RWDD3   | 286102 base downstream | p21.3  | CG | 0.0867 | 1.884 | 0.000442  |
| 18 | rs11874148 | 37292163  | PIK3C3  | 497033 base upstream   | q12.3  | CT | 0.6192 | 0.639 | 0.0003716 |
| 3  | rs1629284  | 41561312  | ULK4    | intron 5               | p22.1  | CG | 0.0597 | 2.01  | 0.0004893 |
| 9  | rs7855045  | 123781479 | TTL11   | 9533 base upstream     | q33.2  | AG | 0.5336 | 1.498 | 0.0005978 |
| 20 | rs17298185 | 19708160  | SLC24A3 | 56620 base downstream  | p11.23 | AG | 0.104  | 1.871 | 0.0001736 |
| 6  | rs4896201  | 136514132 | PDE7B   | intron 6               | q23.3  | AG | 0.4138 | 1.574 | 0.0001287 |
| 3  | rs13071948 | 18167244  | SATB1   | 197194 base upstream   | p24.3  | AG | 0.8547 | 0.584 | 0.0008792 |
| 1  | rs7522882  | 75215582  | LHX8    | 151124 base upstream   | p31.1  | AT | 0.7231 | 0.643 | 0.0004163 |
| 9  | rs7870258  | 2671397   | VLDLR   | 26912 base downstream  | p24.2  | GT | 0.0992 | 1.915 | 0.0001168 |
| 3  | rs1631168  | 41534618  | ULK4    | intron 5               | p22.1  | AC | 0.0609 | 1.977 | 0.0007552 |
| 8  | rs2087688  | 127013476 | TRIB1   | 493652 base downstream | q24.13 | AG | 0.3789 | 1.564 | 0.0001628 |
| 5  | rs10066864 | 105465931 | EFNA5   | 1278318 base upstream  | q21.3  | CT | 0.8674 | 0.598 | 0.0009395 |
| 4  | rs6821554  | 74411672  | ANKRD17 | 68306 base downstream  | q13.3  | AG | 0.0241 | 2.816 | 0.0004364 |
| 11 | rs10890590 | 106171269 | GUCY1A2 | intron 3               | q22.3  | AG | 0.2503 | 0.573 | 0.0004604 |
| 8  | rs7819223  | 127015428 | TRIB1   | 495604 base downstream | q24.13 | CT | 0.621  | 0.639 | 0.0001644 |
| 7  | rs10486848 | 84575619  | SEMA3D  | intron 16              | q21.11 | AG | 0.1861 | 1.716 | 0.0002007 |
| 7  | rs17131831 | 97313206  | ASNS    | 6170 base upstream     | q21.3  | AG | 0.8673 | 0.579 | 0.00023   |

|    |            |           |         |                        |        |    |        |       |           |
|----|------------|-----------|---------|------------------------|--------|----|--------|-------|-----------|
| 4  | rs6841435  | 154494114 | MND1    | intron 2               | q31.3  | CT | 0.5646 | 0.621 | 0.0001165 |
| 8  | rs7005531  | 10719627  | PINX1   | intron 2               | p23.1  | AG | 0.2394 | 0.602 | 0.0009611 |
| 1  | rs511201   | 199815919 | NAV1    | 68153 base upstream    | q32.1  | AG | 0.7466 | 0.641 | 0.0004701 |
| 9  | rs11243525 | 133646531 | RAPGEF1 | 43785 base downstream  | q34.13 | AT | 0.7043 | 0.611 | 0.0001657 |
| 9  | rs10793897 | 133647188 | RAPGEF1 | 44442 base downstream  | q34.13 | CT | 0.7044 | 0.612 | 0.0001653 |
| 8  | rs4568586  | 127018859 | TRIB1   | 499035 base downstream | q24.13 | AT | 0.6207 | 0.639 | 0.0001723 |
| 8  | rs1491474  | 127011528 | TRIB1   | 491704 base downstream | q24.13 | AC | 0.6211 | 0.635 | 0.0001353 |
| 1  | rs11162286 | 75199985  | LHX8    | 166721 base upstream   | p31.1  | AG | 0.2768 | 1.56  | 0.0003942 |
| 4  | rs10516610 | 116460667 | NDST4   | 206186 base downstream | q26    | CT | 0.6103 | 0.636 | 8.88E-05  |
| 18 | rs4318293  | 37293712  | PIK3C3  | 495484 base upstream   | q12.3  | AC | 0.3801 | 1.561 | 0.0003686 |
| 1  | rs6690986  | 219579859 | DUSP10  | 361529 base upstream   | q41    | CT | 0.6393 | 0.657 | 0.0004847 |
| 8  | rs2271356  | 10721186  | PINX1   | intron 3               | p23.1  | AT | 0.2396 | 0.599 | 0.0008677 |
| 6  | rs9498719  | 102373779 | GRIK2   | intron 9               | q16.3  | CT | 0.9239 | 0.526 | 0.0005822 |
| 15 | rs12592703 | 52099177  | UNC13C  | intron 1               | q21.3  | CT | 0.7878 | 0.616 | 0.0004098 |
| 1  | rs4313406  | 219578338 | DUSP10  | 363050 base upstream   | q41    | CT | 0.6393 | 0.657 | 0.000486  |
| 8  | rs2409651  | 10717307  | PINX1   | intron 2               | p23.1  | CT | 0.7606 | 1.66  | 0.0009692 |
| 7  | rs6465629  | 97308426  | ASNS    | 10950 base upstream    | q21.3  | CT | 0.8674 | 0.58  | 0.0002354 |
| 11 | rs1792556  | 15201097  | INSC    | intron 8               | p15.2  | GT | 0.4031 | 1.495 | 0.0005485 |
| 8  | rs9693235  | 4109411   | CSMD1   | intron 67              | p23.2  | AG | 0.0657 | 2.105 | 0.000209  |
| 9  | rs4741044  | 10629445  | PTPRD   | 26936 base downstream  | p23    | AG | 0.862  | 0.555 | 7.89E-05  |
| 7  | rs17561700 | 84580693  | SEMA3D  | intron 16              | q21.11 | GT | 0.1865 | 1.701 | 0.0002313 |
| 7  | rs13223125 | 97309563  | ASNS    | 9813 base upstream     | q21.3  | AT | 0.8673 | 0.579 | 0.0002327 |
| 12 | rs1160327  | 97086002  | TMPO    | 347537 base upstream   | q23.1  | AG | 0.3762 | 0.647 | 0.0009877 |
| 4  | rs7434366  | 116535799 | NDST4   | 281318 base downstream | q26    | AT | 0.3655 | 1.585 | 9.89E-05  |
| 1  | rs3845358  | 75222180  | LHX8    | 144526 base upstream   | p31.1  | AC | 0.2769 | 1.554 | 0.0004274 |
| 1  | rs10797093 | 159370069 | DEDD    | 967 base downstream    | q23.3  | GT | 0.3052 | 1.533 | 0.000322  |
| 11 | rs12223742 | 131489477 | HNT     | intron 2               | q25    | CT | 0.1751 | 0.528 | 0.0004527 |
| 1  | rs678378   | 95781532  | RWDD3   | 296163 base downstream | p21.3  | AG | 0.0867 | 1.893 | 0.0004592 |
| 6  | rs12333317 | 102368610 | GRIK2   | intron 8               | q16.3  | AG | 0.0815 | 1.893 | 0.0006349 |
| 13 | rs1853979  | 104285669 | DAOA    | 630695 base upstream   | q33.2  | AG | 0.4174 | 1.56  | 0.0002964 |
| 1  | rs3912426  | 75235049  | LHX8    | 131657 base upstream   | p31.1  | AG | 0.2769 | 1.554 | 0.0004259 |
| 5  | rs13361333 | 105649426 | EFNA5   | 1094823 base upstream  | q21.3  | CT | 0.1621 | 1.78  | 9.53E-05  |
| 20 | rs6136836  | 19725525  | SLC24A3 | 73985 base downstream  | p11.23 | CT | 0.1054 | 1.88  | 0.00014   |
| 11 | rs1532353  | 44191829  | EXT2    | intron 12              | p11.2  | CT | 0.3592 | 1.499 | 0.0005922 |
| 20 | rs6136840  | 19740762  | RIN2    | 77447 base upstream    | p11.23 | CG | 0.9038 | 0.539 | 0.0001796 |
| 8  | rs2409667  | 10767033  | XKR6    | 24033 base upstream    | p23.1  | AG | 0.8264 | 2.016 | 0.0001663 |
| 5  | rs11949195 | 25900953  | CDH9    | 1015512 base upstream  | p14.1  | AT | 0.6164 | 0.608 | 0.0001894 |



|    |            |           |         |                        |        |    |        |       |           |
|----|------------|-----------|---------|------------------------|--------|----|--------|-------|-----------|
| 20 | rs6035436  | 19705555  | SLC24A3 | 54015 base downstream  | p11.23 | CG | 0.896  | 0.534 | 0.0001728 |
| 13 | rs9575613  | 84081505  | SLITRK1 | 726976 base downstream | q31.1  | AC | 0.8934 | 0.582 | 0.0007448 |
| 8  | rs2052963  | 10713033  | PINX1   | intron 1               | p23.1  | GT | 0.7611 | 1.655 | 0.0009989 |
| 11 | rs4755234  | 44189011  | EXT2    | intron 12              | p11.2  | CT | 0.641  | 0.667 | 0.0005962 |
| 8  | rs7824384  | 10720735  | PINX1   | intron 2               | p23.1  | AC | 0.7606 | 1.662 | 0.0009412 |
| 3  | rs1282932  | 113072462 | PHLDB2  | 13037 base upstream    | q13.2  | AC | 0.6711 | 0.661 | 0.0009503 |
| 3  | rs9839660  | 15005549  | NR2C2   | intron 1               | p24.3  | AT | 0.0441 | 2.274 | 0.0002384 |
| 14 | rs10498375 | 42258065  | LRFN5   | 814567 base downstream | q21.2  | AC | 0.9266 | 0.492 | 0.0002622 |
| 15 | rs12593288 | 31695395  | RYR3    | intron 19              | q14    | CT | 0.79   | 1.793 | 0.0004028 |
| 8  | rs7840785  | 10720537  | PINX1   | intron 2               | p23.1  | CT | 0.7173 | 1.611 | 0.0008928 |
| 16 | rs3814884  | 29902237  | TAOK2   | intron 12              | p11.2  | AT | 0.4532 | 1.53  | 0.0004323 |
| 1  | rs6704485  | 219574484 | DUSP10  | 366904 base upstream   | q41    | CG | 0.3607 | 1.521 | 0.0004937 |
| 1  | rs1355136  | 95792027  | RWDD3   | 306658 base downstream | p21.3  | CT | 0.9105 | 0.52  | 0.0005074 |
| 4  | rs7340984  | 154496631 | MND1    | intron 3               | q31.3  | CG | 0.5589 | 0.629 | 0.000127  |
| 3  | rs17040729 | 15104541  | ZFYVE20 | intron 9               | p24.3  | GT | 0.0446 | 2.335 | 0.0001339 |
| 13 | rs276420   | 39470070  | COG6    | 245438 base downstream | q13.3  | GT | 0.5443 | 0.666 | 0.0004339 |
| 5  | rs1366465  | 25905847  | CDH9    | 1010618 base upstream  | p14.1  | CT | 0.3835 | 1.636 | 0.000192  |
| 8  | rs10109550 | 10722996  | PINX1   | intron 3               | p23.1  | GT | 0.7603 | 1.671 | 0.0008476 |
| 1  | rs10890101 | 74218172  | LRRC44  | 46117 base upstream    | p31.1  | CT | 0.5113 | 0.628 | 0.0001671 |
| 5  | rs10056331 | 105416189 | EFNA5   | 1328060 base upstream  | q21.3  | CT | 0.2986 | 1.556 | 0.0003101 |
| 12 | rs2364153  | 51736002  | TENC1   | intron 10              | q13.13 | CT | 0.6292 | 0.661 | 0.0004579 |
| 5  | rs11949113 | 25900515  | CDH9    | 1015950 base upstream  | p14.1  | GT | 0.3836 | 1.645 | 0.0001893 |
| 5  | rs12658597 | 25906087  | CDH9    | 1010378 base upstream  | p14.1  | CT | 0.6165 | 0.612 | 0.0001929 |
| 8  | rs16938030 | 73185849  | TRPA1   | 35476 base downstream  | q13.3  | CT | 0.1978 | 1.584 | 0.000587  |
| 13 | rs9575621  | 84102404  | SLITRK1 | 747875 base downstream | q31.1  | AC | 0.1077 | 1.71  | 0.0008114 |
| 1  | rs6704281  | 219574269 | DUSP10  | 367119 base upstream   | q41    | CT | 0.3607 | 1.521 | 0.0004939 |
| 15 | rs1897042  | 52090751  | UNC13C  | 1641 base upstream     | q21.3  | AT | 0.3478 | 1.563 | 0.0007924 |
| 6  | rs210052   | 90708506  | BACH2   | intron 2               | q15    | CT | 0.32   | 0.627 | 0.0004435 |
| 20 | rs2866743  | 39604287  | CHD6    | intron 35              | q12    | AG | 0.9827 | 0.331 | 0.00076   |
| 8  | rs6989846  | 10723495  | PINX1   | intron 3               | p23.1  | CT | 0.7603 | 1.673 | 0.0008297 |
| 18 | rs8089910  | 44764374  | SMAD7   | 33295 base downstream  | q21.1  | CG | 0.3675 | 1.53  | 0.000268  |
| 7  | rs12670740 | 26560257  | SCAP2   | 112957 base upstream   | p15.2  | CT | 0.7872 | 0.625 | 0.000338  |
| 1  | rs1267131  | 199813717 | NAV1    | 70355 base upstream    | q32.1  | AC | 0.7462 | 0.639 | 0.0005089 |
| 20 | rs6136842  | 19742718  | RIN2    | 75491 base upstream    | p11.23 | CG | 0.9033 | 0.542 | 0.0002028 |
| 5  | rs6878200  | 105608827 | EFNA5   | 1135422 base upstream  | q21.3  | CT | 0.7987 | 0.609 | 0.0002889 |
| 1  | rs1509178  | 95774113  | RWDD3   | 288744 base downstream | p21.3  | CT | 0.0867 | 1.886 | 0.0004425 |
| 3  | rs13060927 | 18165497  | SATB1   | 198941 base upstream   | p24.3  | AG | 0.1402 | 1.717 | 0.0008271 |

|    |            |           |           |                        |        |    |        |       |           |
|----|------------|-----------|-----------|------------------------|--------|----|--------|-------|-----------|
| 1  | rs2893089  | 89403309  | GBP7      | intron 9               | p22.2  | GT | 0.8183 | 1.834 | 0.0006539 |
| 4  | rs11098294 | 116455651 | NDST4     | 201170 base downstream | q26    | CG | 0.6071 | 0.646 | 0.0001498 |
| 4  | rs1979975  | 116455401 | NDST4     | 200920 base downstream | q26    | AG | 0.6071 | 0.646 | 0.0001498 |
| 5  | rs347670   | 62562511  | LOC389293 | 453585 base downstream | q12.1  | CT | 0.1346 | 0.458 | 0.0006321 |
| 20 | rs16981125 | 19724391  | SLC24A3   | 72851 base downstream  | p11.23 | AG | 0.8945 | 0.531 | 0.0001377 |
| 7  | rs4726247  | 152452942 | ACTR3B    | 269546 base downstream | q36.2  | AG | 0.3295 | 0.622 | 0.0003716 |
| 4  | rs6851203  | 116459223 | NDST4     | 204742 base downstream | q26    | AG | 0.6071 | 0.646 | 0.0001499 |
| 4  | rs9999729  | 92459054  | TMSL3     | 479762 base downstream | q22.1  | CG | 0.2785 | 0.559 | 0.0001131 |
| 7  | rs17344459 | 97304570  | ASNS      | 14806 base upstream    | q21.3  | CT | 0.8693 | 0.578 | 0.000226  |
| 13 | rs276407   | 39479629  | COG6      | 254997 base downstream | q13.3  | AG | 0.5446 | 0.667 | 0.0004401 |
| 3  | rs9839836  | 15118432  | ZFYVE20   | 2773 base downstream   | p24.3  | GT | 0.0453 | 2.302 | 0.0001773 |
| 13 | rs1446792  | 84089937  | SLITRK1   | 735408 base downstream | q31.1  | AG | 0.107  | 1.715 | 0.0007738 |
| 4  | rs9999885  | 92459103  | TMSL3     | 479811 base downstream | q22.1  | AG | 0.7213 | 1.787 | 0.0001133 |
| 5  | rs13154706 | 153749486 | GALNT10   | intron 7               | q33.2  | CT | 0.2926 | 0.573 | 0.0002054 |
| 7  | rs2732741  | 84685921  | SEMA3D    | 96738 base downstream  | q21.11 | AT | 0.2099 | 1.612 | 0.0006101 |
| 4  | rs17842205 | 89068576  | SPP1      | 47249 base upstream    | q22.1  | AC | 0.0905 | 1.977 | 0.0001683 |
| 11 | rs7950006  | 80981836  | MGC33846  | 1138862 base upstream  | q14.1  | AG | 0.5508 | 0.646 | 0.0001862 |
| 7  | rs760228   | 152433675 | ACTR3B    | 250279 base downstream | q36.2  | CT | 0.6269 | 1.658 | 0.0002098 |
| 4  | rs1396064  | 116442250 | NDST4     | 187769 base downstream | q26    | GT | 0.3929 | 1.547 | 0.000153  |
| 4  | rs7653977  | 92459301  | TMSL3     | 480009 base downstream | q22.1  | AT | 0.2787 | 0.56  | 0.0001131 |
| 11 | rs7933268  | 80981521  | MGC33846  | 1139177 base upstream  | q14.1  | GT | 0.5508 | 0.646 | 0.0001861 |
| 13 | rs9514325  | 104287517 | DAOA      | 628847 base upstream   | q33.2  | AG | 0.4185 | 1.564 | 0.0003311 |
| 21 | rs17000817 | 25543181  | MRPL39    | 336659 base upstream   | q21.2  | CT | 0.0273 | 2.595 | 0.0009774 |
| 6  | rs1150711  | 28316514  | ZNF307    | 3954 base upstream     | p22.1  | CT | 0.31   | 0.615 | 0.000479  |
| 4  | rs7698264  | 116450640 | NDST4     | 196159 base downstream | q26    | CT | 0.6071 | 0.646 | 0.0001507 |
| 20 | rs17370886 | 19731315  | SLC24A3   | 79775 base downstream  | p11.23 | GT | 0.8948 | 0.536 | 0.0001668 |
| 4  | rs6533848  | 116448276 | NDST4     | 193795 base downstream | q26    | GT | 0.6071 | 0.646 | 0.0001516 |
| 12 | rs10860299 | 97075690  | TMPO      | 357849 base upstream   | q23.1  | AG | 0.3721 | 0.632 | 0.0008461 |
| 7  | rs12704945 | 97286690  | ASNS      | 32686 base upstream    | q21.3  | AT | 0.1303 | 1.745 | 0.0001951 |
| 19 | rs11084419 | 61182755  | NALP8     | intron 9               | q13.42 | CT | 0.8417 | 2.127 | 0.0001506 |
| 1  | rs1327098  | 75134581  | C1orf171  | 130685 base downstream | p31.1  | AG | 0.2541 | 1.543 | 0.0007072 |
| 5  | rs6870010  | 153745624 | GALNT10   | intron 6               | q33.2  | CT | 0.2761 | 0.573 | 0.0001233 |
| 13 | rs276402   | 39483845  | COG6      | 259213 base downstream | q13.3  | AC | 0.5445 | 0.668 | 0.0004482 |
| 7  | rs7808642  | 97288397  | ASNS      | 30979 base upstream    | q21.3  | GT | 0.8697 | 0.573 | 0.0001962 |
| 1  | rs11590181 | 95591184  | RWDD3     | 105815 base downstream | p21.3  | GT | 0.1303 | 1.721 | 0.0003174 |
| 15 | rs7174086  | 89915807  | SV2B      | 276155 base downstream | q26.1  | CG | 0.3398 | 0.645 | 0.000765  |
| 8  | rs7460673  | 21342868  | GFRA2     | 250943 base upstream   | p21.3  | CT | 0.7848 | 0.604 | 0.0001388 |

|    |            |           |           |                        |        |    |        |       |           |
|----|------------|-----------|-----------|------------------------|--------|----|--------|-------|-----------|
| 4  | rs6533850  | 116454363 | NDST4     | 199882 base downstream | q26    | AT | 0.6071 | 0.646 | 0.0001497 |
| 1  | rs4656002  | 88287316  | PKN2      | 635193 base upstream   | p22.2  | CT | 0.6308 | 1.61  | 0.000194  |
| 1  | rs10923015 | 88287567  | PKN2      | 634942 base upstream   | p22.2  | AT | 0.3692 | 0.621 | 0.0001925 |
| 1  | rs12750340 | 75241712  | LHX8      | 124994 base upstream   | p31.1  | CT | 0.7243 | 0.645 | 0.0005205 |
| 3  | rs2306855  | 15094808  | ZFYVE20   | intron 4               | p24.3  | CT | 0.0432 | 2.319 | 0.0001695 |
| 1  | rs4656003  | 88288082  | PKN2      | 634427 base upstream   | p22.2  | CT | 0.6308 | 1.611 | 0.0001917 |
| 1  | rs7511679  | 160514028 | NOS1AP    | intron 2               | q23.3  | CT | 0.9068 | 2.706 | 0.0004909 |
| 1  | rs11800645 | 160514702 | NOS1AP    | intron 2               | q23.3  | GT | 0.0933 | 0.37  | 0.0004887 |
| 7  | rs2078467  | 97297238  | ASNS      | 22138 base upstream    | q21.3  | CT | 0.1304 | 1.744 | 0.0001971 |
| 1  | rs4656001  | 88287018  | PKN2      | 635491 base upstream   | p22.2  | AG | 0.6309 | 1.609 | 0.0001996 |
| 2  | rs11899039 | 6432676   | LOC129607 | 473227 base upstream   | p25.2  | AT | 0.0874 | 1.845 | 0.0008742 |
| 7  | rs7786920  | 97274004  | ASNS      | 45372 base upstream    | q21.3  | CG | 0.8706 | 0.57  | 0.000195  |
| 7  | rs521309   | 152436269 | ACTR3B    | 252873 base downstream | q36.2  | AG | 0.3022 | 0.596 | 0.0004058 |
| 7  | rs12668997 | 97303824  | ASNS      | 15552 base upstream    | q21.3  | CT | 0.8693 | 0.578 | 0.0002275 |
| 7  | rs12669324 | 97270302  | ASNS      | 49074 base upstream    | q21.3  | CT | 0.1292 | 1.756 | 0.0002006 |
| 20 | rs16981142 | 19738531  | RIN2      | 79678 base upstream    | p11.23 | CG | 0.0952 | 1.847 | 0.0002017 |
| 1  | rs7528328  | 160514403 | NOS1AP    | intron 2               | q23.3  | CT | 0.1664 | 0.519 | 0.0004705 |
| 11 | rs17125182 | 120728846 | SC5DL     | 39517 base downstream  | q24.1  | AG | 0.9687 | 0.401 | 0.0003826 |
| 16 | rs11150580 | 29922065  | FLJ90652  | intron 6               | p11.2  | CT | 0.5485 | 0.648 | 0.0003327 |
| 7  | rs2018083  | 152437650 | ACTR3B    | 254254 base downstream | q36.2  | AG | 0.6697 | 1.608 | 0.0003726 |
| 13 | rs276422   | 39465395  | COG6      | 240763 base downstream | q13.3  | GT | 0.5487 | 0.669 | 0.0006076 |
| 18 | rs12962825 | 44767911  | SMAD7     | 36832 base downstream  | q21.1  | AG | 0.6214 | 0.647 | 0.0002752 |
| 1  | rs625436   | 199828298 | NAV1      | 55774 base upstream    | q32.1  | AG | 0.935  | 0.486 | 0.0003145 |
| 4  | rs6532289  | 92459825  | TMSL3     | 480533 base downstream | q22.1  | CT | 0.2788 | 0.56  | 0.0001132 |
| 3  | rs746665   | 15093737  | ZFYVE20   | intron 3               | p24.3  | AT | 0.9567 | 0.431 | 0.000168  |
| 6  | rs17456339 | 104872515 | HACE1     | 410145 base upstream   | q21    | CT | 0.8265 | 0.612 | 0.0004882 |
| 9  | rs7030993  | 10616033  | PTPRD     | 13524 base downstream  | p23    | AG | 0.1402 | 1.731 | 0.0002219 |
| 5  | rs11957357 | 159163705 | ADRA1B    | 112612 base upstream   | q33.3  | AC | 0.9866 | 0.279 | 0.0006328 |
| 11 | rs16931216 | 15188429  | INSC      | intron 7               | p15.2  | AG | 0.9629 | 0.412 | 0.000789  |
| 4  | rs12642075 | 135192004 | PABPC4L   | 144934 base upstream   | q28.3  | AG | 0.2387 | 0.6   | 0.0008446 |
| 3  | rs2306854  | 15094724  | ZFYVE20   | intron 4               | p24.3  | AC | 0.9568 | 0.431 | 0.0001695 |
| 3  | rs9851219  | 15090727  | ZFYVE20   | EXON 1                 | p24.3  | CT | 0.0434 | 2.319 | 0.000168  |
| 1  | rs4655998  | 88286774  | PKN2      | 635735 base upstream   | p22.2  | AC | 0.631  | 1.607 | 0.0002115 |
| 1  | rs4656000  | 88286988  | PKN2      | 635521 base upstream   | p22.2  | AG | 0.3691 | 0.622 | 0.0002048 |
| 20 | rs17709518 | 3499637   | ATRNL     | intron 11              | p13    | AG | 0.9495 | 0.484 | 0.0009304 |
| 9  | rs10733210 | 10614494  | PTPRD     | 11985 base downstream  | p23    | AC | 0.2403 | 1.546 | 0.000504  |
| 7  | rs459      | 97269283  | ASNS      | 50093 base upstream    | q21.3  | CT | 0.871  | 0.569 | 0.0002071 |

|    |            |           |         |                        |        |    |        |       |           |
|----|------------|-----------|---------|------------------------|--------|----|--------|-------|-----------|
| 1  | rs7525777  | 160514063 | NOS1AP  | intron 2               | q23.3  | CT | 0.1664 | 0.519 | 0.0004711 |
| 4  | rs1565911  | 135194503 | PABPC4L | 142435 base upstream   | q28.3  | GT | 0.7614 | 1.67  | 0.0008131 |
| 8  | rs17607798 | 21341257  | GFRA2   | 252554 base upstream   | p21.3  | AC | 0.7718 | 0.606 | 0.0001017 |
| 1  | rs973886   | 48893107  | AGBL4   | intron 4               | p33    | GT | 0.0569 | 2.144 | 0.0002568 |
| 5  | rs1432711  | 159164640 | ADRA1B  | 111677 base upstream   | q33.3  | CT | 0.9867 | 0.279 | 0.0006454 |
| 8  | rs2587580  | 73173101  | TRPA1   | 22728 base downstream  | q13.3  | CG | 0.7944 | 0.642 | 0.0008995 |
| 9  | rs2146089  | 10614748  | PTPRD   | 12239 base downstream  | p23    | AG | 0.8597 | 0.578 | 0.0002225 |
| 20 | rs17782347 | 3504956   | ATRN    | intron 13              | p13    | CT | 0.0511 | 2.054 | 0.0009435 |
| 3  | rs9844449  | 151314149 | PFN2    | 142718 base downstream | q25.1  | CT | 0.8236 | 1.84  | 0.0009512 |
| 20 | rs17782370 | 3508191   | ATRN    | intron 15              | p13    | CT | 0.9488 | 0.488 | 0.0009526 |
| 8  | rs2587579  | 73172373  | TRPA1   | 22000 base downstream  | q13.3  | CT | 0.2055 | 1.556 | 0.0008991 |
| 8  | rs1491476  | 127007226 | TRIB1   | 487402 base downstream | q24.13 | AG | 0.6179 | 0.646 | 0.0002481 |
| 8  | rs4738207  | 73191306  | TRPA1   | 40933 base downstream  | q13.3  | AG | 0.8028 | 0.633 | 0.0006747 |
| 8  | rs734364   | 21342815  | GFRA2   | 250996 base upstream   | p21.3  | CT | 0.2282 | 1.651 | 0.0001002 |
| 9  | rs11788193 | 2682393   | KCNV2   | 25132 base upstream    | p24.2  | AT | 0.0723 | 2.022 | 0.0004396 |
| 20 | rs17298654 | 19730288  | SLC24A3 | 78748 base downstream  | p11.23 | GT | 0.1052 | 1.866 | 0.0001637 |
| 13 | rs276429   | 39454859  | COG6    | 230227 base downstream | q13.3  | AG | 0.5517 | 0.672 | 0.0007922 |
| 4  | rs6532292  | 92462703  | TMSL3   | 483411 base downstream | q22.1  | CT | 0.7197 | 1.756 | 0.0001165 |
| 5  | rs6862385  | 159173066 | ADRA1B  | 103251 base upstream   | q33.3  | AC | 0.9868 | 0.277 | 0.000626  |
| 13 | rs7338145  | 39443193  | COG6    | 218561 base downstream | q13.3  | AG | 0.6478 | 0.639 | 0.0002386 |
| 1  | rs7525955  | 160514456 | NOS1AP  | intron 2               | q23.3  | AG | 0.8336 | 1.927 | 0.0004713 |
| 3  | rs3773478  | 15088046  | ZFYVE20 | EXON 1                 | p24.3  | CT | 0.9565 | 0.432 | 0.0001739 |
| 5  | rs6884390  | 159168575 | ADRA1B  | 107742 base upstream   | q33.3  | CT | 0.9868 | 0.28  | 0.0006739 |
| 1  | rs617053   | 199814155 | NAV1    | 69917 base upstream    | q32.1  | AG | 0.2488 | 1.56  | 0.0006441 |
| 4  | rs2421069  | 135195163 | PABPC4L | 141775 base upstream   | q28.3  | CT | 0.761  | 1.672 | 0.0007692 |
| 6  | rs17516082 | 104874894 | HACE1   | 407766 base upstream   | q21    | AG | 0.8268 | 0.612 | 0.0005067 |
| 7  | rs760229   | 152440071 | ACTR3B  | 256675 base downstream | q36.2  | AG | 0.33   | 0.622 | 0.0003739 |
| 8  | rs2701439  | 73175604  | TRPA1   | 25231 base downstream  | q13.3  | CG | 0.7942 | 0.642 | 0.0008994 |
| 7  | rs2286180  | 26562895  | SCAP2   | 110319 base upstream   | p15.2  | CG | 0.2123 | 1.578 | 0.0004889 |
| 1  | rs7531138  | 97696087  | DPYD    | intron 10              | p21.3  | AT | 0.4347 | 0.615 | 0.0001516 |
| 1  | rs585041   | 199817630 | NAV1    | 66442 base upstream    | q32.1  | AT | 0.2491 | 1.567 | 0.0005677 |
| 11 | rs10890608 | 106217194 | GUCY1A2 | intron 4               | q22.3  | AT | 0.252  | 0.58  | 0.0004362 |
| 1  | rs12566140 | 48859991  | AGBL4   | intron 2               | p33    | AG | 0.0613 | 2.041 | 0.0007847 |
| 12 | rs11833072 | 104624341 | NUAK1   | 356913 base upstream   | q23.3  | CT | 0.6987 | 0.635 | 0.0004645 |
| 6  | rs7770469  | 136506453 | PDE7B   | intron 3               | q23.3  | AG | 0.39   | 1.579 | 0.0002057 |
| 8  | rs1394485  | 4107562   | CSMD1   | intron 67              | p23.2  | CT | 0.9266 | 0.481 | 0.0002696 |
| 5  | rs6883903  | 159168956 | ADRA1B  | 107361 base upstream   | q33.3  | AG | 0.0132 | 3.576 | 0.0006769 |

|    |            |           |          |                        |        |    |        |       |           |
|----|------------|-----------|----------|------------------------|--------|----|--------|-------|-----------|
| 4  | rs11727958 | 116463016 | NDST4    | 208535 base downstream | q26    | CT | 0.3686 | 1.546 | 0.0001725 |
| 7  | rs13245026 | 97262856  | TAC1     | 55136 base downstream  | q21.3  | AG | 0.8716 | 0.568 | 0.0002266 |
| 4  | rs1919227  | 92462591  | TMSL3    | 483299 base downstream | q22.1  | GT | 0.7197 | 1.757 | 0.0001159 |
| 13 | rs2296991  | 98300600  | DOCK9    | intron 21              | q32.3  | CT | 0.8463 | 0.59  | 0.0003028 |
| 18 | rs11662228 | 69451956  | FBXO15   | 439629 base upstream   | q22.3  | CT | 0.561  | 1.532 | 0.000676  |
| 3  | rs9830744  | 15090482  | ZFYVE20  | EXON 1                 | p24.3  | CT | 0.9554 | 0.439 | 0.0002219 |
| 4  | rs6532293  | 92463052  | TMSL3    | 483760 base downstream | q22.1  | AG | 0.7194 | 1.75  | 0.0001184 |
| 5  | rs4527577  | 105504488 | EFNA5    | 1239761 base upstream  | q21.3  | CT | 0.1904 | 1.612 | 0.0004544 |
| 4  | rs1534556  | 92478508  | TMSL3    | 499216 base downstream | q22.1  | AG | 0.7194 | 1.748 | 0.0001312 |
| 4  | rs882733   | 40505735  | FLJ14001 | EXON 11                | p14    | AG | 0.1688 | 0.514 | 0.0003984 |
| 6  | rs4945639  | 104878861 | HACE1    | 403799 base upstream   | q21    | CT | 0.8277 | 0.614 | 0.0005763 |
| 7  | rs2732743  | 84683866  | SEMA3D   | 94683 base downstream  | q21.11 | CT | 0.2113 | 1.592 | 0.0007572 |
| 15 | rs6496832  | 89910099  | SV2B     | 270447 base downstream | q26.1  | AG | 0.66   | 1.548 | 0.0007989 |
| 1  | rs519693   | 95796000  | RWDD3    | 310631 base downstream | p21.3  | CT | 0.0865 | 1.918 | 0.000566  |
| 7  | rs993059   | 97262360  | TAC1     | 54640 base downstream  | q21.3  | CT | 0.1282 | 1.761 | 0.0002327 |
| 13 | rs2324845  | 41467528  | KIAA0564 | 34307 base downstream  | q14.11 | CT | 0.5428 | 1.534 | 0.0004405 |
| 9  | rs10966629 | 24988099  | TUSC1    | 678294 base upstream   | p21.3  | AG | 0.3264 | 1.485 | 0.0007467 |
| 1  | rs10923014 | 88285953  | PKN2     | 636556 base upstream   | p22.2  | CT | 0.631  | 1.605 | 0.000219  |
| 7  | rs2311855  | 152454874 | ACTR3B   | 271478 base downstream | q36.2  | GT | 0.3701 | 0.632 | 0.0003354 |
| 13 | rs2031635  | 104286376 | DAOA     | 629988 base upstream   | q33.2  | AG | 0.4609 | 1.556 | 0.0007334 |
| 7  | rs2058106  | 97259519  | TAC1     | 51799 base downstream  | q21.3  | AT | 0.1279 | 1.762 | 0.000244  |
| 1  | rs6674328  | 48894788  | AGBL4    | intron 4               | p33    | CT | 0.943  | 0.468 | 0.0002697 |
| 2  | rs17454262 | 116082577 | DPP10    | intron 5               | q14.1  | CT | 0.0861 | 2.028 | 0.0002852 |
| 1  | rs12117077 | 88284959  | PKN2     | 637550 base upstream   | p22.2  | CT | 0.369  | 0.623 | 0.0002237 |
| 7  | rs11764340 | 97260570  | TAC1     | 52850 base downstream  | q21.3  | AC | 0.8719 | 0.568 | 0.0002366 |
| 6  | rs1353588  | 99799997  | C6orf168 | 35261 base upstream    | q16.2  | AC | 0.2139 | 1.57  | 0.0005752 |
| 7  | rs2732742  | 84684755  | SEMA3D   | 95572 base downstream  | q21.11 | AG | 0.7886 | 0.628 | 0.0007557 |
| 15 | rs4238566  | 31694920  | RYR3     | intron 19              | q14    | AC | 0.2562 | 0.594 | 0.0004663 |
| 1  | rs685982   | 199829227 | NAV1     | 54845 base upstream    | q32.1  | AT | 0.2501 | 1.585 | 0.0005151 |
| 1  | rs677390   | 199818411 | NAV1     | 65661 base upstream    | q32.1  | AG | 0.7509 | 0.638 | 0.0005671 |
| 13 | rs11619622 | 41468201  | KIAA0564 | 34980 base downstream  | q14.11 | AG | 0.5765 | 0.675 | 0.0009514 |
| 18 | rs11876675 | 69453896  | FBXO15   | 437689 base upstream   | q22.3  | AG | 0.4384 | 0.654 | 0.0007313 |
| 8  | rs4738208  | 73191692  | TRPA1    | 41319 base downstream  | q13.3  | CT | 0.1971 | 1.578 | 0.0006935 |
| 7  | rs1525489  | 122420709 | TAS2R16  | 1285 base upstream     | q31.32 | AG | 0.9368 | 0.472 | 0.0006167 |
| 6  | rs13197557 | 104880442 | HACE1    | 402218 base upstream   | q21    | AG | 0.8279 | 0.614 | 0.000584  |
| 7  | rs2058105  | 97259532  | TAC1     | 51812 base downstream  | q21.3  | AT | 0.872  | 0.568 | 0.0002422 |
| 9  | rs12347630 | 2663801   | VLDLR    | 19316 base downstream  | p24.2  | AG | 0.0759 | 2.014 | 0.0003564 |

|    |            |           |           |                        |        |    |        |       |           |
|----|------------|-----------|-----------|------------------------|--------|----|--------|-------|-----------|
| 16 | rs17698989 | 74938492  | CNTNAP4   | intron 2               | q23.1  | AG | 0.1959 | 1.598 | 0.0005257 |
| 3  | rs9868848  | 15090876  | ZFYVE20   | EXON 1                 | p24.3  | AG | 0.9566 | 0.431 | 0.0001677 |
| 1  | rs608356   | 199826786 | NAV1      | 57286 base upstream    | q32.1  | AG | 0.7504 | 0.634 | 0.0005397 |
| 3  | rs9831248  | 41524937  | ULK4      | intron 5               | p22.1  | CG | 0.0609 | 1.975 | 0.0007721 |
| 11 | rs16931218 | 15191628  | INSC      | intron 7               | p15.2  | CT | 0.0368 | 2.408 | 0.000846  |
| 8  | rs17069790 | 4112508   | CSMD1     | intron 67              | p23.2  | AG | 0.074  | 2.086 | 0.0003973 |
| 1  | rs11589642 | 199367371 | TMEM9     | 3152 base upstream     | q32.1  | AG | 0.2321 | 1.654 | 0.0002816 |
| 4  | rs6532291  | 92462653  | TMSL3     | 483361 base downstream | q22.1  | AG | 0.7017 | 1.754 | 0.000138  |
| 3  | rs1256396  | 41526055  | ULK4      | intron 5               | p22.1  | AT | 0.0609 | 1.975 | 0.0007703 |
| 12 | rs1962255  | 104624562 | NUAK1     | 356692 base upstream   | q23.3  | AC | 0.3035 | 1.534 | 0.0007173 |
| 7  | rs2534851  | 84686087  | SEMA3D    | 96904 base downstream  | q21.11 | GT | 0.7882 | 0.627 | 0.0007483 |
| 6  | rs1997660  | 28377642  | PGBD1     | EXON 7                 | p22.1  | AG | 0.687  | 1.594 | 0.0006861 |
| 8  | rs17069778 | 4108928   | CSMD1     | intron 67              | p23.2  | AT | 0.9266 | 0.484 | 0.0003111 |
| 8  | rs4614034  | 73197756  | TRPA1     | 47383 base downstream  | q13.3  | CT | 0.8037 | 0.634 | 0.0007755 |
| 7  | rs2732744  | 84680820  | SEMA3D    | 91637 base downstream  | q21.11 | CT | 0.2114 | 1.59  | 0.0007827 |
| 7  | rs2732738  | 84686625  | SEMA3D    | 97442 base downstream  | q21.11 | AG | 0.7882 | 0.626 | 0.0007487 |
| 3  | rs17424938 | 113068623 | PHLDB2    | 16876 base upstream    | q13.2  | AG | 0.8487 | 0.6   | 0.0009553 |
| 1  | rs17113368 | 95558817  | RWDD3     | 73448 base downstream  | p21.3  | CT | 0.8844 | 0.545 | 0.0001781 |
| 6  | rs12193060 | 99797170  | C6orf168  | 38088 base upstream    | q16.2  | AG | 0.7859 | 0.637 | 0.0005769 |
| 6  | rs4711122  | 26866458  | ZNF322A   | 98516 base downstream  | p22.1  | CT | 0.7597 | 0.64  | 0.0006981 |
| 1  | rs12143926 | 88276958  | PKN2      | 645551 base upstream   | p22.2  | CT | 0.3689 | 0.624 | 0.0002387 |
| 1  | rs12145270 | 95798178  | RWDD3     | 312809 base downstream | p21.3  | AT | 0.0863 | 1.919 | 0.0007732 |
| 20 | rs16981148 | 19738602  | RIN2      | 79607 base upstream    | p11.23 | AG | 0.1009 | 1.816 | 0.0002815 |
| 8  | rs4738209  | 73191724  | TRPA1     | 41351 base downstream  | q13.3  | AC | 0.1968 | 1.576 | 0.0007461 |
| 1  | rs4912069  | 19518260  | PQLC2     | intron 2               | p36.13 | AG | 0.2764 | 1.568 | 0.0003977 |
| 3  | rs13085823 | 102219726 | ABI3BP    | 24722 base downstream  | q12.2  | GT | 0.674  | 0.658 | 0.0005352 |
| 4  | rs17513709 | 40496876  | FLJ14001  | intron 10              | p14    | GT | 0.1742 | 0.523 | 0.0005323 |
| 4  | rs6446921  | 74412384  | ANKRD17   | 69018 base downstream  | q13.3  | AG | 0.0275 | 2.719 | 0.0003499 |
| 4  | rs1565912  | 135194459 | PABPC4L   | 142479 base upstream   | q28.3  | AG | 0.2387 | 0.599 | 0.0008198 |
| 1  | rs12566596 | 88279379  | PKN2      | 643130 base upstream   | p22.2  | CG | 0.3462 | 0.598 | 0.0002687 |
| 3  | rs9834782  | 151306869 | PFN2      | 135438 base downstream | q25.1  | AC | 0.1465 | 0.467 | 0.0005598 |
| 3  | rs4258937  | 41519427  | ULK4      | intron 5               | p22.1  | AG | 0.9391 | 0.507 | 0.0007877 |
| 7  | rs2732737  | 84686884  | SEMA3D    | 97701 base downstream  | q21.11 | AG | 0.7879 | 0.625 | 0.0007427 |
| 20 | rs2423853  | 14862709  | C20orf133 | intron 5               | p12.1  | AT | 0.4246 | 0.642 | 0.0003372 |
| 1  | rs2296883  | 89290783  | GBP1      | EXON 1                 | p22.2  | AG | 0.81   | 1.767 | 0.000907  |
| 7  | rs2159579  | 84683482  | SEMA3D    | 94299 base downstream  | q21.11 | GT | 0.7719 | 0.622 | 0.0004107 |
| 5  | rs6880807  | 26041000  | CDH9      | 875465 base upstream   | p14.1  | GT | 0.3673 | 1.519 | 0.0006875 |

|    |            |           |           |                        |        |    |        |       |           |
|----|------------|-----------|-----------|------------------------|--------|----|--------|-------|-----------|
| 7  | rs10270627 | 69839751  | AUTS2     | intron 6               | q11.22 | GT | 0.3977 | 1.482 | 0.000855  |
| 19 | rs1560690  | 57270159  | ZNF432    | 26274 base downstream  | q13.33 | AG | 0.7269 | 0.659 | 0.0008467 |
| 8  | rs4467976  | 73193049  | TRPA1     | 42676 base downstream  | q13.3  | AG | 0.1967 | 1.575 | 0.0007591 |
| 3  | rs2017454  | 41530567  | ULK4      | intron 5               | p22.1  | AG | 0.0609 | 1.976 | 0.0007665 |
| 1  | rs10800760 | 199367062 | TMEM9     | 3461 base upstream     | q32.1  | AG | 0.2318 | 1.652 | 0.0002819 |
| 11 | rs6254     | 13470839  | PTH       | intron 1               | p15.2  | CT | 0.6624 | 0.663 | 0.0006841 |
| 7  | rs4129516  | 49051370  | ABCA13    | 393733 base downstream | p12.3  | CT | 0.2446 | 1.611 | 0.0003161 |
| 3  | rs17040623 | 15003482  | NR2C2     | intron 1               | p24.3  | AG | 0.9559 | 0.44  | 0.0002425 |
| 19 | rs11669439 | 57264112  | ZNF432    | 20227 base downstream  | q13.33 | CT | 0.727  | 0.66  | 0.0008796 |
| 6  | rs270678   | 104891512 | HACE1     | 391148 base upstream   | q21    | CT | 0.1705 | 1.645 | 0.0004536 |
| 4  | rs10021844 | 135184692 | PABPC4L   | 152246 base upstream   | q28.3  | AG | 0.2388 | 0.604 | 0.0009659 |
| 2  | rs10182455 | 38464515  | ARL6IP2   | 6596 base downstream   | p22.1  | AG | 0.3842 | 0.639 | 0.0002799 |
| 17 | rs7213514  | 24561368  | CRYBA1    | 36632 base upstream    | q11.2  | CT | 0.4822 | 0.635 | 0.0001623 |
| 8  | rs2701441  | 73174272  | TRPA1     | 23899 base downstream  | q13.3  | AG | 0.7943 | 0.642 | 0.0008991 |
| 6  | rs7755721  | 26794868  | ZNF322A   | 26926 base downstream  | p22.1  | CT | 0.2377 | 1.561 | 0.0007264 |
| 1  | rs2064378  | 19517442  | PQLC2     | intron 2               | p36.13 | AG | 0.2752 | 1.577 | 0.0003698 |
| 16 | rs4788196  | 29874935  | LOC124446 | 5916 base upstream     | p11.2  | AG | 0.5304 | 0.667 | 0.0008711 |
| 4  | rs17441923 | 40498127  | FLJ14001  | intron 10              | p14    | CT | 0.174  | 0.522 | 0.0005262 |
| 1  | rs17113374 | 95561952  | RWDD3     | 76583 base downstream  | p21.3  | CT | 0.8845 | 0.545 | 0.0001778 |
| 19 | rs8101936  | 57268291  | ZNF432    | 24406 base downstream  | q13.33 | AT | 0.2731 | 1.517 | 0.0008511 |
| 1  | rs12025414 | 199367119 | TMEM9     | 3404 base upstream     | q32.1  | AG | 0.768  | 0.605 | 0.000282  |
| 1  | rs6427667  | 160510650 | NOS1AP    | intron 2               | q23.3  | CG | 0.1626 | 0.514 | 0.0004974 |
| 4  | rs1840086  | 72354222  | SLC4A4    | intron 3               | q13.3  | AG | 0.1519 | 1.74  | 0.0002381 |
| 4  | rs4698460  | 13358506  | FAM44A    | 120080 base downstream | p15.33 | GT | 0.2752 | 0.596 | 0.0007066 |
| 7  | rs12671326 | 26566825  | SCAP2     | 106389 base upstream   | p15.2  | CT | 0.788  | 0.636 | 0.0005654 |
| 3  | rs9825022  | 15059018  | NR2C2     | intron 14              | p24.3  | CT | 0.955  | 0.445 | 0.0002893 |
| 4  | rs1528581  | 92461122  | TMSL3     | 481830 base downstream | q22.1  | CT | 0.724  | 1.758 | 0.0001407 |
| 9  | rs1322294  | 10616389  | PTPRD     | 13880 base downstream  | p23    | AG | 0.1533 | 1.689 | 0.0003902 |
| 4  | rs1565910  | 135194549 | PABPC4L   | 142389 base upstream   | q28.3  | AG | 0.7614 | 1.671 | 0.0007961 |
| 1  | rs10489284 | 170633685 | DNM3      | intron 20              | q24.3  | AG | 0.8353 | 1.914 | 0.0006193 |
| 7  | rs607348   | 152443576 | ACTR3B    | 260180 base downstream | q36.2  | CT | 0.659  | 1.608 | 0.0004294 |
| 6  | rs12194369 | 99803170  | C6orf168  | 32088 base upstream    | q16.2  | AG | 0.7871 | 0.634 | 0.0005198 |
| 1  | rs4471302  | 170633760 | DNM3      | intron 20              | q24.3  | CT | 0.1647 | 0.522 | 0.0006129 |
| 1  | rs2296882  | 89290761  | GBP1      | EXON 1                 | p22.2  | AT | 0.81   | 1.767 | 0.0009069 |
| 1  | rs12125877 | 95798313  | RWDD3     | 312944 base downstream | p21.3  | CG | 0.9137 | 0.521 | 0.0007908 |
| 8  | rs12680834 | 140500127 | KCNK9     | 193858 base upstream   | q24.3  | CT | 0.7901 | 0.618 | 0.0006363 |
| 2  | rs6726368  | 60183809  | BCL11A    | 347996 base upstream   | p16.1  | CG | 0.3314 | 1.527 | 0.0007336 |

|    |            |           |          |                        |        |    |        |       |           |
|----|------------|-----------|----------|------------------------|--------|----|--------|-------|-----------|
| 5  | rs6888211  | 159144339 | ADRA1B   | 131978 base upstream   | q33.3  | CT | 0.9864 | 0.289 | 0.0008395 |
| 20 | rs2426960  | 58927301  | CDH4     | 333652 base upstream   | q13.33 | AG | 0.4292 | 1.473 | 0.0006826 |
| 3  | rs9820676  | 15058788  | NR2C2    | intron 14              | p24.3  | CG | 0.955  | 0.446 | 0.0002919 |
| 13 | rs7333428  | 45873366  | C13orf18 | 13730 base downstream  | q14.12 | CT | 0.1098 | 1.773 | 0.0008033 |
| 4  | rs6533889  | 116592228 | NDST4    | 337747 base downstream | q26    | GT | 0.615  | 0.65  | 0.0003581 |
| 8  | rs12541309 | 32664543  | NRG1     | intron 3               | p12    | AG | 0.1544 | 0.514 | 0.0007458 |
| 4  | rs3762827  | 92465367  | TMSL3    | 486075 base downstream | q22.1  | AG | 0.7218 | 1.73  | 0.0001681 |
| 13 | rs913560   | 98293824  | DOCK9    | intron 18              | q32.3  | AG | 0.5535 | 0.661 | 0.0003178 |
| 13 | rs9547416  | 85339936  | SLITRK6  | 68452 base downstream  | q31.1  | AT | 0.5941 | 0.679 | 0.0009097 |
| 11 | rs10897779 | 80661868  | MGC33846 | 1458830 base upstream  | q14.1  | GT | 0.7653 | 1.661 | 0.0009906 |
| 11 | rs1487892  | 106197626 | GUCY1A2  | intron 4               | q22.3  | AG | 0.2518 | 0.587 | 0.0005487 |
| 16 | rs3096190  | 24389161  | RBBP6    | 69247 base upstream    | p12.1  | AC | 0.3646 | 1.505 | 0.0009158 |
| 7  | rs7341466  | 17140404  | AHR      | 164427 base upstream   | p21.1  | GT | 0.9345 | 0.501 | 0.0009508 |
| 7  | rs7777347  | 69842984  | AUTS2    | intron 6               | q11.22 | AG | 0.6028 | 0.67  | 0.0006992 |
| 4  | rs1528578  | 92466196  | TMSL3    | 486904 base downstream | q22.1  | CG | 0.7218 | 1.729 | 0.0001696 |
| 5  | rs16879856 | 51859304  | PELO     | 260226 base upstream   | q11.2  | CT | 0.9712 | 0.409 | 0.0009519 |
| 1  | rs12408132 | 89290506  | GBP1     | 68 base upstream       | p22.2  | CT | 0.1976 | 0.562 | 0.0008712 |
| 6  | rs853683   | 28403018  | ZNF323   | intron 1               | p22.1  | AG | 0.6866 | 1.587 | 0.0007608 |
| 10 | rs17400327 | 6924140   | PRKCQ    | 261896 base downstream | p14    | CT | 0.9671 | 0.378 | 0.0004228 |
| 7  | rs4718991  | 69844069  | AUTS2    | intron 6               | q11.22 | CG | 0.579  | 0.667 | 0.000626  |
| 13 | rs366300   | 39500866  | COG6     | 276234 base downstream | q14.11 | CT | 0.441  | 1.499 | 0.0005714 |
| 6  | rs707907   | 28399219  | ZNF323   | 1274 base upstream     | p22.1  | AG | 0.6866 | 1.588 | 0.0007423 |
| 6  | rs17517558 | 104904271 | HACE1    | 378389 base upstream   | q21    | AC | 0.8299 | 0.608 | 0.0004441 |
| 8  | rs1530402  | 73169428  | TRPA1    | 19055 base downstream  | q13.3  | AG | 0.2057 | 1.557 | 0.0009114 |
| 12 | rs11176534 | 65691760  | CAND1    | 257655 base upstream   | q14.3  | CT | 0.8966 | 0.53  | 0.000236  |
| 6  | rs156153   | 104904758 | HACE1    | 377902 base upstream   | q21    | AG | 0.83   | 0.608 | 0.0004437 |
| 6  | rs155510   | 104912555 | HACE1    | 370105 base upstream   | q21    | GT | 0.1698 | 1.642 | 0.0004541 |
| 10 | rs16937080 | 80764708  | PPIF     | 12517 base upstream    | q22.3  | AT | 0.2756 | 0.597 | 0.0004031 |
| 6  | rs156151   | 104905700 | HACE1    | 376960 base upstream   | q21    | CG | 0.17   | 1.643 | 0.000446  |
| 3  | rs10510434 | 14995353  | NR2C2    | intron 1               | p24.3  | AG | 0.9558 | 0.442 | 0.0002568 |
| 14 | rs7157782  | 94397359  | GSC      | 91107 base downstream  | q32.13 | CT | 0.9369 | 0.503 | 0.0008033 |
| 7  | rs1107874  | 152455222 | ACTR3B   | 271826 base downstream | q36.2  | AT | 0.3268 | 0.629 | 0.0005744 |
| 8  | rs17069640 | 4075094   | CSMD1    | intron 67              | p23.2  | GT | 0.0393 | 2.299 | 0.0005543 |
| 6  | rs13211684 | 51283445  | PKHD1    | 304658 base upstream   | p12.2  | CT | 0.3792 | 0.649 | 0.0007549 |
| 7  | rs7806434  | 69846869  | AUTS2    | intron 6               | q11.22 | AG | 0.5791 | 0.666 | 0.0006104 |
| 3  | rs12485454 | 151327125 | PFN2     | 155694 base downstream | q25.1  | CT | 0.6711 | 1.564 | 0.0008133 |
| 12 | rs11176545 | 65709564  | CAND1    | 239851 base upstream   | q14.3  | AT | 0.1292 | 1.759 | 0.000215  |



|    |            |           |          |                        |        |    |        |       |           |
|----|------------|-----------|----------|------------------------|--------|----|--------|-------|-----------|
| 1  | rs10754315 | 88301956  | PKN2     | 620553 base upstream   | p22.2  | CT | 0.3453 | 0.636 | 0.0005197 |
| 1  | rs1048848  | 89290653  | GBP1     | EXON 1                 | p22.2  | CG | 0.1899 | 0.566 | 0.0009073 |
| 3  | rs2643977  | 41516991  | ULK4     | intron 5               | p22.1  | CT | 0.061  | 1.972 | 0.0007978 |
| 12 | rs10747658 | 51731549  | TENC1    | intron 1               | q13.13 | AG | 0.5859 | 0.656 | 0.0005021 |
| 1  | rs7556329  | 48896205  | AGBL4    | intron 4               | p33    | CG | 0.0572 | 2.119 | 0.000307  |
| 14 | rs1030124  | 78060216  | NRXN3    | intron 1               | q24.3  | GT | 0.6068 | 0.663 | 0.0004378 |
| 11 | rs7949287  | 80994506  | MGC33846 | 1126192 base upstream  | q14.1  | AG | 0.5381 | 0.65  | 0.0002524 |
| 1  | rs6675866  | 89290398  | GBP1     | 176 base upstream      | p22.2  | CT | 0.8101 | 1.769 | 0.0008996 |
| 7  | rs1107875  | 152454977 | ACTR3B   | 271581 base downstream | q36.2  | AG | 0.6711 | 1.586 | 0.0005768 |
| 14 | rs4243660  | 78067940  | NRXN3    | intron 1               | q24.3  | CT | 0.3933 | 1.509 | 0.0004358 |
| 1  | rs967881   | 74116329  | LRRC44   | 147960 base upstream   | p31.1  | AG | 0.6685 | 0.649 | 0.0003346 |
| 12 | rs11176539 | 65706599  | CAND1    | 242816 base upstream   | q14.3  | CG | 0.1293 | 1.76  | 0.0002156 |
| 8  | rs2701449  | 73170538  | TRPA1    | 20165 base downstream  | q13.3  | CT | 0.7945 | 0.643 | 0.0009055 |
| 14 | rs1030123  | 78060082  | NRXN3    | intron 1               | q24.3  | AG | 0.3932 | 1.508 | 0.0004372 |
| 12 | rs11176540 | 65708448  | CAND1    | 240967 base upstream   | q14.3  | GT | 0.1293 | 1.76  | 0.0002156 |
| 7  | rs10258925 | 49031338  | ABCA13   | 373701 base downstream | p12.3  | AG | 0.2394 | 1.571 | 0.0005533 |
| 16 | rs2560922  | 24384824  | RBBP6    | 73584 base upstream    | p12.1  | GT | 0.6387 | 0.661 | 0.0009667 |
| 13 | rs366815   | 85345072  | SLITRK6  | 73588 base downstream  | q31.1  | AG | 0.5938 | 0.68  | 0.0009938 |
| 12 | rs6581729  | 65706048  | CAND1    | 243367 base upstream   | q14.3  | AG | 0.1293 | 1.761 | 0.000216  |
| 14 | rs2193670  | 78085602  | NRXN3    | intron 1               | q24.3  | AG | 0.3931 | 1.513 | 0.0004287 |
| 12 | rs17103210 | 65705663  | CAND1    | 243752 base upstream   | q14.3  | AT | 0.1293 | 1.761 | 0.0002154 |
| 1  | rs6672527  | 74111118  | LRRC44   | 153171 base upstream   | p31.1  | CT | 0.6671 | 0.644 | 0.0003262 |
| 4  | rs1406316  | 92472949  | TMSL3    | 493657 base downstream | q22.1  | CT | 0.2776 | 0.581 | 0.000188  |
| 1  | rs11210363 | 74122434  | LRRC44   | 141855 base upstream   | p31.1  | AG | 0.3312 | 1.546 | 0.0003158 |
| 12 | rs7955793  | 65718923  | CAND1    | 230492 base upstream   | q14.3  | AG | 0.1289 | 1.754 | 0.0002084 |
| 1  | rs17579506 | 74117298  | LRRC44   | 146991 base upstream   | p31.1  | CT | 0.3313 | 1.541 | 0.0003273 |
| 2  | rs4971622  | 49146315  | FSHR     | intron 8               | p16.3  | AT | 0.9559 | 0.448 | 0.0008832 |
| 11 | rs547248   | 62420235  | SLC3A2   | 7307 base downstream   | q12.3  | CT | 0.286  | 1.504 | 0.000882  |
| 12 | rs992738   | 65692893  | CAND1    | 256522 base upstream   | q14.3  | CT | 0.8966 | 0.53  | 0.0002312 |
| 14 | rs7157079  | 94397102  | GSC      | 90850 base downstream  | q32.13 | AG | 0.9368 | 0.504 | 0.0007734 |
| 13 | rs10851281 | 89217299  | GPC5     | 1631588 base upstream  | q31.3  | AG | 0.9681 | 0.375 | 0.0004084 |
| 1  | rs17520168 | 74117107  | LRRC44   | 147182 base upstream   | p31.1  | CT | 0.3314 | 1.54  | 0.0003317 |
| 1  | rs12727614 | 159363865 | DEDD     | intron 4               | q23.3  | AT | 0.2896 | 1.493 | 0.0009697 |
| 1  | rs12125905 | 95798397  | RWDD3    | 313028 base downstream | p21.3  | CG | 0.9137 | 0.521 | 0.0008384 |
| 13 | rs7984054  | 89221294  | GPC5     | 1627593 base upstream  | q31.3  | AC | 0.0316 | 2.684 | 0.0004401 |
| 3  | rs1691983  | 41517346  | ULK4     | intron 5               | p22.1  | AG | 0.9391 | 0.507 | 0.0007945 |
| 4  | rs11944843 | 140857153 | MAML3    | EXON 1                 | q31.1  | AG | 0.1798 | 1.611 | 0.0009609 |

|    |            |           |          |                        |        |    |        |       |           |
|----|------------|-----------|----------|------------------------|--------|----|--------|-------|-----------|
| 3  | rs17315194 | 101331030 | C3orf26  | intron 1               | q12.1  | GT | 0.1172 | 1.713 | 0.0008636 |
| 1  | rs942703   | 199359602 | TMEM9    | 10921 base upstream    | q32.1  | CT | 0.7656 | 0.626 | 0.0002938 |
| 6  | rs3757154  | 136476887 | PDE7B    | intron 3               | q23.3  | CG | 0.6128 | 0.654 | 0.0004072 |
| 3  | rs2643976  | 41516845  | ULK4     | intron 5               | p22.1  | AG | 0.061  | 1.967 | 0.0008391 |
| 8  | rs1443942  | 73171160  | TRPA1    | 20787 base downstream  | q13.3  | AC | 0.7945 | 0.643 | 0.0009024 |
| 1  | rs11210361 | 74112532  | LRRC44   | 151757 base upstream   | p31.1  | CT | 0.3319 | 1.539 | 0.0003473 |
| 18 | rs2051413  | 69425930  | FBXO15   | 465655 base upstream   | q22.3  | AG | 0.6272 | 1.538 | 0.0008833 |
| 12 | rs12369132 | 65699454  | CAND1    | 249961 base upstream   | q14.3  | AG | 0.8701 | 0.566 | 0.0002335 |
| 11 | rs1945649  | 80986103  | MGC33846 | 1134595 base upstream  | q14.1  | CT | 0.4619 | 1.54  | 0.0002489 |
| 1  | rs6685886  | 205560841 | CD55     | 598 base upstream      | q32.2  | AC | 0.4243 | 1.486 | 0.0009032 |
| 12 | rs905699   | 65704574  | CAND1    | 244841 base upstream   | q14.3  | CT | 0.8706 | 0.568 | 0.0002164 |
| 8  | rs2701440  | 73175388  | TRPA1    | 25015 base downstream  | q13.3  | CT | 0.2058 | 1.557 | 0.0008995 |
| 8  | rs2701450  | 73168913  | TRPA1    | 18540 base downstream  | q13.3  | AT | 0.7943 | 0.642 | 0.0009163 |
| 7  | rs7341406  | 17138564  | AHR      | 166267 base upstream   | p21.1  | CG | 0.9328 | 0.522 | 0.0009745 |
| 13 | rs7329978  | 89218832  | GPC5     | 1630055 base upstream  | q31.3  | AG | 0.9682 | 0.374 | 0.0004194 |
| 11 | rs11608098 | 13516530  | PTH      | 42387 base downstream  | p15.2  | CT | 0.338  | 1.502 | 0.0007341 |
| 13 | rs7333687  | 98288560  | DOCK9    | intron 18              | q32.3  | AG | 0.555  | 0.666 | 0.0003827 |
| 13 | rs4772149  | 98305163  | DOCK9    | intron 22              | q32.3  | CT | 0.4235 | 1.509 | 0.0005135 |
| 13 | rs6492451  | 89220997  | GPC5     | 1627890 base upstream  | q31.3  | CT | 0.0316 | 2.683 | 0.0004379 |
| 8  | rs1838285  | 73171725  | TRPA1    | 21352 base downstream  | q13.3  | CT | 0.7945 | 0.643 | 0.0009028 |
| 12 | rs7953084  | 65700060  | CAND1    | 249355 base upstream   | q14.3  | AC | 0.1299 | 1.766 | 0.0002332 |
| 14 | rs7156858  | 94396959  | GSC      | 90707 base downstream  | q32.13 | AC | 0.9368 | 0.504 | 0.0007754 |
| 14 | rs11629123 | 78053255  | NRXN3    | intron 1               | q24.3  | CT | 0.607  | 0.662 | 0.0004194 |
| 12 | rs11176528 | 65684056  | CAND1    | 265359 base upstream   | q14.3  | CT | 0.1035 | 1.878 | 0.0002652 |
| 4  | rs6833290  | 92471115  | TMSL3    | 491823 base downstream | q22.1  | CT | 0.7224 | 1.722 | 0.0001876 |
| 13 | rs17591593 | 31563969  | FRY      | intron 2               | q13.1  | CG | 0.3059 | 1.533 | 0.0008732 |
| 15 | rs12324460 | 89929416  | SLCO3A1  | 268533 base upstream   | q26.1  | CT | 0.175  | 0.53  | 0.0008422 |
| 14 | rs2098518  | 78087589  | NRXN3    | intron 1               | q24.3  | CG | 0.607  | 0.661 | 0.000427  |
| 10 | rs1013250  | 6933270   | PRKCQ    | 271026 base downstream | p14    | AG | 0.0334 | 2.722 | 0.0006818 |
| 4  | rs6532301  | 92491016  | TMSL3    | 511724 base downstream | q22.1  | AG | 0.2764 | 0.589 | 0.0002868 |
| 11 | rs10500784 | 13530401  | PTH      | 56258 base downstream  | p15.2  | AC | 0.6618 | 0.668 | 0.0007944 |
| 13 | rs7321357  | 98302606  | DOCK9    | intron 21              | q32.3  | CT | 0.8508 | 0.59  | 0.0004955 |
| 11 | rs10890611 | 106227169 | GUCY1A2  | intron 4               | q22.3  | CT | 0.2395 | 0.593 | 0.0008528 |
| 14 | rs1777077  | 42258660  | LRFN5    | 815162 base downstream | q21.2  | CT | 0.2364 | 1.628 | 0.0008463 |
| 7  | rs11762613 | 49076176  | ABCA13   | 418539 base downstream | p12.3  | AC | 0.2388 | 1.597 | 0.0004154 |
| 1  | rs4656008  | 88297128  | PKN2     | 625381 base upstream   | p22.2  | GT | 0.6547 | 1.571 | 0.0005229 |
| 4  | rs1390026  | 135193417 | PABPC4L  | 143521 base upstream   | q28.3  | GT | 0.2387 | 0.6   | 0.0008298 |

|    |            |           |          |                         |        |    |        |       |           |
|----|------------|-----------|----------|-------------------------|--------|----|--------|-------|-----------|
| 18 | rs1943869  | 69430600  | FBXO15   | 460985 base upstream    | q22.3  | CG | 0.6271 | 1.535 | 0.0008859 |
| 5  | rs17560965 | 125194811 | GRAMD3   | 592188 base upstream    | q23.2  | AG | 0.0405 | 2.373 | 0.0009369 |
| 16 | rs11076229 | 56846460  | HSPC065  | intron 3                | q21    | AG | 0.1484 | 0.513 | 0.0008281 |
| 11 | rs11212007 | 106389222 | GUCY1A2  | intron 7                | q22.3  | AC | 0.2363 | 0.57  | 0.0007701 |
| 10 | rs11199656 | 122674538 | BRWD2    | 15513 base downstream   | q26.12 | CT | 0.0385 | 2.34  | 0.0006159 |
| 2  | rs6760123  | 38456015  | ARL6IP2  | intron 12               | p22.1  | CT | 0.6155 | 1.566 | 0.0002906 |
| 11 | rs10792479 | 79787547  | ODZ4     | 1586714 base downstream | q14.1  | CT | 0.2582 | 1.572 | 0.0006423 |
| 3  | rs9835136  | 45011179  | EXOSC7   | intron 3                | p21.31 | AG | 0.5314 | 1.486 | 0.0009251 |
| 18 | rs4892117  | 69429890  | FBXO15   | 461695 base upstream    | q22.3  | CT | 0.3727 | 0.652 | 0.0009108 |
| 3  | rs4894477  | 176307233 | NAALADL2 | intron 2                | q26.31 | AG | 0.3748 | 1.524 | 0.0003366 |
| 13 | rs9300518  | 98286664  | DOCK9    | intron 17               | q32.3  | CT | 0.4437 | 1.502 | 0.0003835 |
| 2  | rs3806551  | 38459723  | ARL6IP2  | 1804 base downstream    | p22.1  | CG | 0.3896 | 0.637 | 0.0002793 |
| 6  | rs853693   | 28390627  | ZNF323   | 9866 base upstream      | p22.1  | AG | 0.3135 | 0.628 | 0.0007056 |
| 16 | rs16959980 | 56847308  | HSPC065  | intron 3                | q21    | CT | 0.1486 | 0.512 | 0.000807  |
| 7  | rs2215361  | 48944124  | ABCA13   | 286487 base downstream  | p12.3  | AG | 0.7583 | 0.653 | 0.0009407 |
| 11 | rs1903102  | 13531228  | PTH      | 57085 base downstream   | p15.2  | AC | 0.3382 | 1.498 | 0.0007936 |
| 11 | rs2037194  | 83252000  | DLG2     | intron 12               | q14.1  | AG | 0.9686 | 0.365 | 0.0004335 |
| 16 | rs11647205 | 53289736  | IRX5     | 232875 base upstream    | q12.2  | AG | 0.3598 | 1.51  | 0.0005251 |
| 16 | rs8044591  | 53292008  | IRX5     | 230603 base upstream    | q12.2  | AC | 0.3578 | 1.522 | 0.0005324 |
| 6  | rs2465043  | 51288724  | PKHD1    | 299379 base upstream    | p12.2  | AG | 0.3535 | 1.521 | 0.0008637 |
| 3  | rs11919885 | 41516460  | ULK4     | intron 5                | p22.1  | CT | 0.9388 | 0.512 | 0.0009609 |
| 3  | rs1440524  | 29735511  | RBMS3    | intron 4                | p24.1  | CT | 0.3517 | 1.489 | 0.0005483 |
| 3  | rs4683016  | 45005286  | EXOSC7   | intron 1                | p21.31 | AG | 0.4684 | 0.673 | 0.0009401 |
| 4  | rs1348188  | 29184029  | PCDH7    | 1147105 base upstream   | p15.1  | CT | 0.5955 | 0.661 | 0.0004234 |
| 6  | rs2504586  | 26862629  | ZNF322A  | 94687 base downstream   | p22.1  | CG | 0.2269 | 1.569 | 0.00088   |
| 4  | rs6854632  | 116559642 | NDST4    | 305161 base downstream  | q26    | AG | 0.6409 | 0.657 | 0.0003162 |
| 4  | rs6849851  | 92645841  | TMSL3    | 666549 base downstream  | q22.1  | AG | 0.4016 | 1.547 | 0.0004122 |
| 4  | rs6847471  | 116558804 | NDST4    | 304323 base downstream  | q26    | AG | 0.3591 | 1.522 | 0.0003149 |
| 6  | rs1417665  | 104923637 | HACE1    | 359023 base upstream    | q21    | CT | 0.168  | 1.635 | 0.0005055 |
| 11 | rs10890604 | 106210532 | GUCY1A2  | intron 4                | q22.3  | AG | 0.2458 | 0.598 | 0.00089   |
| 13 | rs2875552  | 43902494  | TSC22D1  | 3166 base upstream      | q14.11 | CT | 0.6021 | 1.542 | 0.0005232 |
| 16 | rs12596498 | 56846678  | HSPC065  | intron 3                | q21    | CT | 0.8515 | 1.952 | 0.0008168 |
| 1  | rs17113360 | 95555047  | RWDD3    | 69678 base downstream   | p21.3  | CT | 0.1175 | 1.765 | 0.0003163 |
| 3  | rs6441875  | 44998914  | EXOSC7   | intron 1                | p21.31 | CT | 0.5317 | 1.485 | 0.000952  |
| 11 | rs7941624  | 80658536  | MGC33846 | 1462162 base upstream   | q14.1  | AG | 0.7895 | 1.83  | 0.0007665 |
| 6  | rs17459015 | 104924468 | HACE1    | 358192 base upstream    | q21    | CT | 0.1681 | 1.636 | 0.0005074 |
| 6  | rs9374562  | 116111190 | FRK      | 258196 base upstream    | q22.1  | CT | 0.7303 | 0.648 | 0.0005912 |

|    |            |           |          |                         |        |    |        |       |           |
|----|------------|-----------|----------|-------------------------|--------|----|--------|-------|-----------|
| 4  | rs4833478  | 116549189 | NDST4    | 294708 base downstream  | q26    | AG | 0.3591 | 1.523 | 0.0003117 |
| 1  | rs12120668 | 75093605  | C1orf171 | 89709 base downstream   | p31.1  | CG | 0.4141 | 1.526 | 0.0008122 |
| 16 | rs1974876  | 56842704  | HSPC065  | intron 1                | q21    | CT | 0.8516 | 1.948 | 0.0008337 |
| 2  | rs3806552  | 38458897  | ARL6IP2  | 978 base downstream     | p22.1  | AC | 0.6122 | 1.564 | 0.0003282 |
| 5  | rs327807   | 98306052  | CHD1     | 15914 base downstream   | q21.1  | AG | 0.3301 | 1.513 | 0.0008027 |
| 4  | rs12233647 | 116540808 | NDST4    | 286327 base downstream  | q26    | AG | 0.3591 | 1.523 | 0.0003117 |
| 4  | rs7687193  | 116540440 | NDST4    | 285959 base downstream  | q26    | AG | 0.6409 | 0.657 | 0.0003117 |
| 20 | rs2024676  | 58926954  | CDH4     | 333999 base upstream    | q13.33 | AG | 0.4294 | 1.472 | 0.0007014 |
| 11 | rs1954864  | 106222728 | GUCY1A2  | intron 4                | q22.3  | GT | 0.2465 | 0.592 | 0.0008942 |
| 4  | rs6836582  | 116552171 | NDST4    | 297690 base downstream  | q26    | AG | 0.3585 | 1.522 | 0.0003177 |
| 4  | rs11947264 | 116548085 | NDST4    | 293604 base downstream  | q26    | CT | 0.6409 | 0.657 | 0.0003117 |
| 3  | rs12639280 | 41515056  | ULK4     | intron 5                | p22.1  | CT | 0.0612 | 1.952 | 0.0009649 |
| 4  | rs11933617 | 116542863 | NDST4    | 288382 base downstream  | q26    | AG | 0.3591 | 1.523 | 0.0003117 |
| 2  | rs13022199 | 115870472 | DPP10    | intron 3                | q14.1  | AG | 0.1239 | 1.698 | 0.0008936 |
| 16 | rs11076230 | 56846486  | HSPC065  | intron 3                | q21    | GT | 0.1484 | 0.513 | 0.0008243 |
| 11 | rs2097171  | 81001119  | MGC33846 | 1119579 base upstream   | q14.1  | CT | 0.4608 | 1.523 | 0.0003378 |
| 4  | rs7440324  | 116554439 | NDST4    | 299958 base downstream  | q26    | AT | 0.6409 | 0.657 | 0.0003117 |
| 1  | rs7556311  | 48896154  | AGBL4    | intron 4                | p33    | AG | 0.0572 | 2.12  | 0.0003055 |
| 5  | rs10054300 | 51883415  | PELO     | 236115 base upstream    | q11.2  | AG | 0.0287 | 2.47  | 0.0008679 |
| 6  | rs9342293  | 92328542  | MAP3K7   | 974914 base downstream  | q16.1  | AT | 0.7814 | 1.72  | 0.0006304 |
| 11 | rs2448273  | 79783016  | ODZ4     | 1582183 base downstream | q14.1  | AC | 0.2569 | 1.56  | 0.0007651 |
| 4  | rs6814621  | 116548408 | NDST4    | 293927 base downstream  | q26    | AC | 0.6409 | 0.657 | 0.0003117 |
| 13 | rs9595128  | 43934565  | TSC22D1  | intron 2                | q14.11 | AG | 0.5991 | 1.534 | 0.0005893 |
| 1  | rs7547762  | 199354868 | CACNA1S  | 6551 base downstream    | q32.1  | AG | 0.7664 | 0.628 | 0.0002989 |
| 4  | rs6533870  | 116537368 | NDST4    | 282887 base downstream  | q26    | AG | 0.3591 | 1.523 | 0.0003119 |
| 2  | rs17453131 | 115868314 | DPP10    | intron 3                | q14.1  | AG | 0.8762 | 0.59  | 0.0009339 |
| 7  | rs10238315 | 78880949  | MAGI2    | intron 21               | q21.11 | GT | 0.7152 | 0.653 | 0.000411  |
| 3  | rs4683017  | 45009415  | EXOSC7   | intron 3                | p21.31 | CT | 0.4685 | 0.673 | 0.0009292 |
| 8  | rs3817664  | 17545472  | MTUS1    | 111 base upstream       | p22    | GT | 0.3837 | 1.492 | 0.0008093 |
| 2  | rs1863704  | 219270919 | STK36    | EXON 25                 | q35    | AG | 0.3753 | 0.629 | 0.0003006 |
| 1  | rs12568661 | 88292306  | PKN2     | 630203 base upstream    | p22.2  | AG | 0.3455 | 0.64  | 0.000564  |
| 7  | rs17561679 | 84577029  | SEMA3D   | intron 16               | q21.11 | CT | 0.2279 | 1.587 | 0.0005514 |
| 7  | rs1029563  | 84576431  | SEMA3D   | intron 16               | q21.11 | GT | 0.2281 | 1.59  | 0.0005359 |
| 11 | rs7125479  | 107990612 | EXPH5    | 21042 base downstream   | q22.3  | AC | 0.4647 | 0.669 | 0.0007634 |
| 13 | rs4943722  | 39493988  | COG6     | 269356 base downstream  | q13.3  | AG | 0.3667 | 1.475 | 0.0008047 |
| 6  | rs271880   | 104920459 | HACE1    | 362201 base upstream    | q21    | AG | 0.1699 | 1.644 | 0.0004812 |
| 7  | rs7796330  | 49098405  | ABCA13   | 440768 base downstream  | p12.3  | CT | 0.7647 | 0.614 | 0.0005654 |

|    |            |           |          |                        |        |    |        |       |           |
|----|------------|-----------|----------|------------------------|--------|----|--------|-------|-----------|
| 7  | rs1029564  | 84577791  | SEMA3D   | intron 16              | q21.11 | GT | 0.2284 | 1.587 | 0.0005549 |
| 5  | rs7730948  | 51877283  | PELO     | 242247 base upstream   | q11.2  | CT | 0.0287 | 2.465 | 0.0008839 |
| 7  | rs9655226  | 22565267  | IL6      | 168075 base upstream   | p15.3  | CT | 0.3705 | 0.656 | 0.0009557 |
| 19 | rs17685204 | 33606816  | UQCRFS1  | 783190 base upstream   | q12    | CT | 0.0981 | 1.803 | 0.0005935 |
| 1  | rs2145408  | 46634494  | FAAH     | intron 1               | p33    | AG | 0.2472 | 1.544 | 0.0007961 |
| 21 | rs2835491  | 37142992  | HLCS     | intron 5               | q22.13 | GT | 0.0416 | 2.216 | 0.000961  |
| 11 | rs7943773  | 83240882  | DLG2     | intron 12              | q14.1  | CT | 0.0313 | 2.606 | 0.0004762 |
| 13 | rs9595132  | 43946832  | TSC22D1  | intron 2               | q14.11 | AG | 0.5985 | 1.536 | 0.0005852 |
| 6  | rs156123   | 104918438 | HACE1    | 364222 base upstream   | q21    | AG | 0.8317 | 0.613 | 0.000538  |
| 8  | rs10101487 | 60881049  | CA8      | 382927 base upstream   | q12.1  | AG | 0.3209 | 0.63  | 0.0007774 |
| 11 | rs10832047 | 13480447  | PTH      | 6304 base downstream   | p15.2  | AT | 0.6443 | 0.666 | 0.0009094 |
| 4  | rs1441670  | 29199244  | PCDH7    | 1131890 base upstream  | p15.1  | AG | 0.4048 | 1.509 | 0.0004467 |
| 8  | rs2725673  | 5526530   | CSMD1    | 686794 base downstream | p23.2  | AG | 0.7958 | 0.634 | 0.0007277 |
| 6  | rs13219556 | 104917442 | HACE1    | 365218 base upstream   | q21    | CT | 0.8317 | 0.612 | 0.0005331 |
| 4  | rs6847969  | 116558768 | NDST4    | 304287 base downstream | q26    | AG | 0.6409 | 0.657 | 0.0003117 |
| 11 | rs7944123  | 106221180 | GUCY1A2  | intron 4               | q22.3  | AG | 0.7603 | 1.69  | 0.0008165 |
| 2  | rs12232909 | 83399672  | SUCLG1   | 1104492 base upstream  | p12    | AG | 0.5972 | 0.663 | 0.0004329 |
| 6  | rs17458588 | 104920190 | HACE1    | 362470 base upstream   | q21    | CT | 0.1681 | 1.631 | 0.0005445 |
| 14 | rs2273154  | 34502938  | SRP54    | 19043 base upstream    | q13.2  | CT | 0.8082 | 1.819 | 0.0007798 |
| 7  | rs2691810  | 12650865  | SCIN     | intron 13              | p21.3  | CT | 0.1196 | 1.787 | 0.0003403 |
| 13 | rs9549041  | 39501308  | COG6     | 276676 base downstream | q14.11 | CT | 0.6399 | 0.681 | 0.0009546 |
| 3  | rs11128731 | 15034334  | NR2C2    | intron 5               | p24.3  | CT | 0.045  | 2.234 | 0.0003184 |
| 1  | rs12562662 | 48877073  | AGBL4    | intron 3               | p33    | CT | 0.0606 | 2.019 | 0.0007331 |
| 13 | rs12583155 | 43922370  | TSC22D1  | intron 2               | q14.11 | CT | 0.399  | 0.654 | 0.0006002 |
| 16 | rs7206354  | 53288365  | IRX5     | 234246 base upstream   | q12.2  | AC | 0.6401 | 0.663 | 0.0005249 |
| 10 | rs1246758  | 30254709  | KIAA1462 | 88680 base upstream    | p11.23 | AC | 0.2469 | 0.581 | 0.0005423 |
| 2  | rs17362720 | 115970570 | DPP10    | intron 3               | q14.1  | AG | 0.1116 | 1.777 | 0.0006202 |
| 21 | rs17192962 | 37142961  | HLCS     | intron 5               | q22.13 | AG | 0.9584 | 0.451 | 0.0009591 |
| 4  | rs7436806  | 72354592  | SLC4A4   | intron 3               | q13.3  | AG | 0.0947 | 1.966 | 0.0002319 |
| 5  | rs13361153 | 118636074 | TNFAIP8  | intron 1               | q23.1  | AG | 0.7445 | 1.774 | 0.0004075 |
| 4  | rs4834470  | 116523298 | NDST4    | 268817 base downstream | q26    | CT | 0.3589 | 1.515 | 0.0003703 |
| 21 | rs8134687  | 37142296  | HLCS     | intron 5               | q22.13 | CT | 0.0416 | 2.216 | 0.0009579 |
| 4  | rs7663921  | 116518282 | NDST4    | 263801 base downstream | q26    | CT | 0.6411 | 0.66  | 0.0003728 |
| 4  | rs11935578 | 115536217 | UGT8     | 226754 base upstream   | q26    | GT | 0.6359 | 0.656 | 0.0003435 |
| 11 | rs540225   | 125258570 | HYLS1    | 148 base upstream      | q24.2  | CT | 0.3129 | 1.537 | 0.0003892 |
| 7  | rs2190179  | 78883432  | MAGI2    | intron 21              | q21.11 | AC | 0.2854 | 1.528 | 0.0004328 |
| 20 | rs6071442  | 58941909  | CDH4     | 319044 base upstream   | q13.33 | CT | 0.5707 | 0.683 | 0.0007853 |

|    |            |           |          |                        |        |    |        |       |           |
|----|------------|-----------|----------|------------------------|--------|----|--------|-------|-----------|
| 14 | rs1122840  | 78035507  | NRXN3    | intron 1               | q24.3  | AG | 0.3924 | 1.496 | 0.0005471 |
| 3  | rs1866774  | 29756855  | RBMS3    | intron 5               | p24.1  | AG | 0.4941 | 1.466 | 0.0009942 |
| 6  | rs9345152  | 92326845  | MAP3K7   | 973217 base downstream | q16.1  | AG | 0.2186 | 0.582 | 0.0006474 |
| 7  | rs4140898  | 26555282  | SCAP2    | 117932 base upstream   | p15.2  | AG | 0.2662 | 1.521 | 0.0009253 |
| 6  | rs156126   | 104916776 | HACE1    | 365884 base upstream   | q21    | CT | 0.8289 | 0.608 | 0.0004893 |
| 11 | rs17141854 | 80661677  | MGC33846 | 1459021 base upstream  | q14.1  | AG | 0.9576 | 0.432 | 0.0007204 |
| 11 | rs2852205  | 107987483 | EXPH5    | 17913 base downstream  | q22.3  | AG | 0.5344 | 1.494 | 0.0007968 |
| 20 | rs725475   | 58938883  | CDH4     | 322070 base upstream   | q13.33 | CT | 0.4294 | 1.465 | 0.0007874 |
| 11 | rs7934388  | 107991327 | EXPH5    | 21757 base downstream  | q22.3  | AT | 0.5353 | 1.494 | 0.0007967 |
| 2  | rs6712054  | 115974128 | DPP10    | intron 4               | q14.1  | CT | 0.8884 | 0.563 | 0.0006224 |
| 13 | rs9603665  | 39500347  | COG6     | 275715 base downstream | q14.11 | CT | 0.6394 | 0.68  | 0.0009091 |
| 16 | rs13338826 | 50054960  | SALL1    | 312276 base downstream | q12.1  | CG | 0.8094 | 0.629 | 0.0006423 |
| 5  | rs16879891 | 51871156  | PELO     | 248374 base upstream   | q11.2  | GT | 0.9713 | 0.408 | 0.0009222 |
| 2  | rs12712583 | 38396077  | ARL6IP2  | intron 9               | p22.2  | CT | 0.4012 | 0.645 | 0.0003296 |
| 7  | rs2159575  | 84598360  | SEMA3D   | 9177 base downstream   | q21.11 | CT | 0.763  | 0.627 | 0.0005528 |
| 2  | rs7604319  | 219247043 | STK36    | intron 4               | q35    | AC | 0.6246 | 1.578 | 0.0003829 |
| 13 | rs7997862  | 41469136  | KIAA0564 | 35915 base downstream  | q14.11 | AG | 0.5576 | 1.507 | 0.0007322 |
| 6  | rs12195114 | 26816186  | ZNF322A  | 48244 base downstream  | p22.1  | AG | 0.758  | 0.643 | 0.0007752 |
| 6  | rs9467847  | 26817570  | ZNF322A  | 49628 base downstream  | p22.1  | CT | 0.2421 | 1.554 | 0.0007769 |
| 4  | rs2135965  | 116428916 | NDST4    | 174435 base downstream | q26    | AG | 0.6807 | 0.653 | 0.0004115 |
| 3  | rs6782183  | 176310661 | NAALADL2 | intron 2               | q26.31 | CT | 0.601  | 0.676 | 0.0006005 |
| 2  | rs2241527  | 219245468 | STK36    | intron 1               | q35    | AG | 0.3754 | 0.635 | 0.0004098 |
| 11 | rs11022897 | 13577497  | MLSTD2   | 69349 base upstream    | p15.2  | CT | 0.6575 | 0.659 | 0.0006406 |
| 2  | rs2305245  | 38391130  | ARL6IP2  | intron 6               | p22.2  | AC | 0.6012 | 1.551 | 0.0003417 |
| 13 | rs4942331  | 43928799  | TSC22D1  | intron 2               | q14.11 | CT | 0.6007 | 1.53  | 0.0005964 |
| 17 | rs12953287 | 9717196   | GLP2R    | intron 10              | p13.1  | CT | 0.8463 | 0.601 | 0.0008705 |
| 2  | rs1022076  | 38397553  | ARL6IP2  | intron 9               | p22.2  | CT | 0.5988 | 1.551 | 0.000329  |
| 1  | rs7516699  | 48870913  | AGBL4    | intron 2               | p33    | AG | 0.9185 | 0.543 | 0.0009731 |
| 9  | rs1826415  | 104678314 | CYLC2    | 119169 base upstream   | q31.1  | CT | 0.7689 | 0.637 | 0.0009647 |
| 6  | rs12202849 | 26812951  | ZNF322A  | 45009 base downstream  | p22.1  | AG | 0.242  | 1.554 | 0.000774  |
| 2  | rs6745924  | 83404583  | SUCLG1   | 1099581 base upstream  | p12    | CG | 0.4029 | 1.51  | 0.000431  |
| 14 | rs1990531  | 78016834  | NRXN3    | intron 1               | q24.3  | AG | 0.3828 | 1.521 | 0.0004084 |
| 8  | rs10100498 | 5510132   | CSMD1    | 670396 base downstream | p23.2  | AC | 0.7512 | 0.642 | 0.0005539 |
| 4  | rs6820042  | 127239590 | FAT4     | 606053 base downstream | q28.1  | AG | 0.1393 | 1.678 | 0.0005336 |
| 11 | rs7946763  | 81005829  | MGC33846 | 1114869 base upstream  | q14.1  | AC | 0.4512 | 1.515 | 0.0004144 |
| 12 | rs11176527 | 65682486  | CAND1    | 266929 base upstream   | q14.3  | AG | 0.1037 | 1.852 | 0.000375  |
| 1  | rs6429600  | 46637098  | FAAH     | intron 1               | p33    | AG | 0.7529 | 0.648 | 0.000806  |

|    |            |           |          |                         |        |    |        |       |           |
|----|------------|-----------|----------|-------------------------|--------|----|--------|-------|-----------|
| 1  | rs4556311  | 74234416  | LRRC44   | 29873 base upstream     | p31.1  | AG | 0.4662 | 0.631 | 0.0003524 |
| 17 | rs9900880  | 24573932  | CRYBA1   | 24068 base upstream     | q11.2  | AG | 0.3953 | 0.62  | 0.0003777 |
| 6  | rs9362888  | 92321886  | MAP3K7   | 968258 base downstream  | q16.1  | AG | 0.7815 | 1.711 | 0.0007016 |
| 4  | rs13120921 | 13326569  | FAM44A   | 88143 base downstream   | p15.33 | CT | 0.6042 | 1.536 | 0.0004702 |
| 4  | rs1554850  | 92515582  | TMSL3    | 536290 base downstream  | q22.1  | AC | 0.73   | 1.704 | 0.0005529 |
| 3  | rs4683014  | 44994064  | EXOSC7   | intron 1                | p21.31 | AG | 0.4682 | 0.674 | 0.0009763 |
| 11 | rs17142764 | 81054378  | MGC33846 | 1066320 base upstream   | q14.1  | CG | 0.777  | 0.642 | 0.0008483 |
| 8  | rs1043883  | 17547711  | MTUS1    | EXON 1                  | p22    | CG | 0.6194 | 0.669 | 0.0006589 |
| 1  | rs2008873  | 115298685 | SYCP1    | intron 27               | p13.2  | AT | 0.1225 | 1.703 | 0.0006426 |
| 17 | rs727999   | 24570756  | CRYBA1   | 27244 base upstream     | q11.2  | AG | 0.3953 | 0.62  | 0.0003774 |
| 4  | rs7672780  | 92514491  | TMSL3    | 535199 base downstream  | q22.1  | AG | 0.7007 | 1.659 | 0.0003579 |
| 4  | rs7685112  | 116508739 | NDST4    | 254258 base downstream  | q26    | CT | 0.641  | 0.661 | 0.0003795 |
| 6  | rs9345149  | 92320478  | MAP3K7   | 966850 base downstream  | q16.1  | AT | 0.2185 | 0.585 | 0.000717  |
| 18 | rs2960028  | 26046673  | DSC3     | 777376 base upstream    | q12.1  | AT | 0.5564 | 1.507 | 0.0008251 |
| 2  | rs10181140 | 37367267  | PRKD3    | intron 14               | p22.2  | GT | 0.2238 | 1.564 | 0.0007586 |
| 10 | rs2776630  | 30256403  | KIAA1462 | 86986 base upstream     | p11.23 | CT | 0.2395 | 0.59  | 0.0007324 |
| 4  | rs7436414  | 116514942 | NDST4    | 260461 base downstream  | q26    | AG | 0.6411 | 0.661 | 0.0003766 |
| 7  | rs7810943  | 152475034 | ACTR3B   | 291638 base downstream  | q36.2  | AG | 0.6271 | 1.552 | 0.0004964 |
| 11 | rs10897849 | 81004683  | MGC33846 | 1116015 base upstream   | q14.1  | AG | 0.5487 | 0.661 | 0.0004244 |
| 1  | rs6604543  | 215519038 | GPATCH2  | 151418 base upstream    | q41    | AG | 0.5353 | 0.683 | 0.0008434 |
| 17 | rs8080958  | 24532830  | CRYBA1   | 65170 base upstream     | q11.2  | AT | 0.5532 | 1.543 | 0.0003081 |
| 5  | rs952663   | 93824426  | MGC34713 | 56493 base upstream     | q15    | AG | 0.4694 | 1.483 | 0.000618  |
| 6  | rs9342290  | 92320349  | MAP3K7   | 966721 base downstream  | q16.1  | CT | 0.2185 | 0.585 | 0.0007201 |
| 12 | rs11043491 | 17575942  | FLJ22655 | 549127 base upstream    | p12.3  | GT | 0.1868 | 0.53  | 0.0002866 |
| 12 | rs11178026 | 68680548  | RAB3IP   | 177299 base downstream  | q15    | CT | 0.2607 | 0.591 | 0.0004324 |
| 14 | rs3861665  | 94460547  | GSC      | 154295 base downstream  | q32.13 | AG | 0.8272 | 1.973 | 0.0004057 |
| 17 | rs4965978  | 24548368  | CRYBA1   | 49632 base upstream     | q11.2  | CT | 0.553  | 1.546 | 0.0002971 |
| 1  | rs633696   | 199813623 | NAV1     | 70449 base upstream     | q32.1  | CT | 0.0591 | 2.045 | 0.0008842 |
| 8  | rs9324508  | 140497987 | KCNK9    | 195998 base upstream    | q24.3  | AG | 0.2428 | 1.559 | 0.0006541 |
| 1  | rs2343194  | 74229988  | LRRC44   | 34301 base upstream     | p31.1  | AG | 0.4695 | 0.634 | 0.0004293 |
| 11 | rs2448274  | 79784289  | ODZ4     | 1583456 base downstream | q14.1  | CG | 0.7494 | 0.643 | 0.0009398 |
| 14 | rs11622766 | 78027611  | NRXN3    | intron 1                | q24.3  | AG | 0.6178 | 0.656 | 0.0003683 |
| 11 | rs7482266  | 79783565  | ODZ4     | 1582732 base downstream | q14.1  | CT | 0.7494 | 0.643 | 0.0009388 |
| 4  | rs7437909  | 116501880 | NDST4    | 247399 base downstream  | q26    | CT | 0.6406 | 0.661 | 0.0003939 |
| 1  | rs7535727  | 48878877  | AGBL4    | intron 3                | p33    | GT | 0.9188 | 0.541 | 0.0008738 |
| 4  | rs6844256  | 92524147  | TMSL3    | 544855 base downstream  | q22.1  | CG | 0.2995 | 0.602 | 0.0003474 |
| 4  | rs17010704 | 127248513 | FAT4     | 614976 base downstream  | q28.1  | AT | 0.1393 | 1.681 | 0.0005095 |

|    |            |           |          |                        |        |    |        |       |           |
|----|------------|-----------|----------|------------------------|--------|----|--------|-------|-----------|
| 19 | rs4334417  | 37368199  | ZNF507   | 160193 base upstream   | q13.11 | AG | 0.4813 | 0.657 | 0.0008017 |
| 4  | rs1528564  | 92477494  | TMSL3    | 498202 base downstream | q22.1  | CT | 0.2912 | 0.597 | 0.0003137 |
| 4  | rs2178221  | 92521289  | TMSL3    | 541997 base downstream | q22.1  | CT | 0.2995 | 0.602 | 0.0003501 |
| 13 | rs2026026  | 98301534  | DOCK9    | intron 21              | q32.3  | CT | 0.1652 | 1.634 | 0.0005855 |
| 11 | rs7929262  | 125183381 | C11orf38 | 29457 base downstream  | q24.2  | AT | 0.6869 | 0.655 | 0.0004373 |
| 13 | rs9603660  | 39493139  | COG6     | 268507 base downstream | q13.3  | CT | 0.6374 | 0.678 | 0.0007457 |
| 17 | rs9895410  | 45486194  | ITGA3    | 2535 base upstream     | q21.33 | CT | 0.1189 | 1.793 | 0.0002947 |
| 11 | rs1945662  | 81005553  | MGC33846 | 1115145 base upstream  | q14.1  | CT | 0.5487 | 0.66  | 0.0004211 |
| 3  | rs6763592  | 176315642 | NAALADL2 | intron 2               | q26.31 | GT | 0.3997 | 1.484 | 0.0005766 |
| 1  | rs11120691 | 205553098 | CD55     | 8341 base upstream     | q32.2  | GT | 0.4399 | 1.468 | 0.0009389 |
| 4  | rs10000358 | 116502459 | NDST4    | 247978 base downstream | q26    | AG | 0.3593 | 1.513 | 0.0003897 |
| 4  | rs17010686 | 127243008 | FAT4     | 609471 base downstream | q28.1  | AG | 0.8607 | 0.595 | 0.0005093 |
| 4  | rs7668527  | 92527407  | TMSL3    | 548115 base downstream | q22.1  | AT | 0.7011 | 1.665 | 0.0003319 |
| 4  | rs1678305  | 8400638   | ACOX3    | 18270 base upstream    | p16.1  | CT | 0.5887 | 1.597 | 0.0003165 |
| 4  | rs6837355  | 92523247  | TMSL3    | 543955 base downstream | q22.1  | AG | 0.2995 | 0.602 | 0.0003484 |
| 5  | rs7728878  | 93827557  | MGC34713 | 53362 base upstream    | q15    | CT | 0.5253 | 0.675 | 0.0007419 |
| 3  | rs17550007 | 29734340  | RBMS3    | intron 4               | p24.1  | GT | 0.6586 | 0.675 | 0.0008584 |
| 20 | rs6128962  | 58942206  | CDH4     | 318747 base upstream   | q13.33 | AG | 0.5709 | 0.683 | 0.0008165 |
| 2  | rs7606701  | 38403351  | ARL6IP2  | intron 11              | p22.1  | AC | 0.6045 | 1.551 | 0.0003361 |
| 5  | rs9314112  | 93821414  | MGC34713 | 59505 base upstream    | q15    | AG | 0.469  | 1.485 | 0.0006204 |
| 1  | rs841329   | 94942350  | SLC44A3  | 116138 base upstream   | p21.3  | AG | 0.444  | 1.504 | 0.0008246 |
| 7  | rs7776954  | 124677258 | POT1     | 319985 base downstream | q31.33 | AG | 0.7517 | 0.634 | 0.0006815 |
| 4  | rs1358554  | 92512505  | TMSL3    | 533213 base downstream | q22.1  | CT | 0.2993 | 0.603 | 0.0003555 |
| 4  | rs6858268  | 8386637   | HTRA3    | 26907 base downstream  | p16.1  | CT | 0.649  | 0.676 | 0.0007683 |
| 2  | rs9808407  | 38403917  | ARL6IP2  | intron 11              | p22.1  | AC | 0.4011 | 0.644 | 0.0003225 |
| 17 | rs12936268 | 9717002   | GLP2R    | intron 10              | p13.1  | AT | 0.8464 | 0.601 | 0.0009002 |
| 3  | rs13082004 | 60197075  | FHIT     | intron 5               | p14.2  | CT | 0.1879 | 0.523 | 0.0003843 |
| 2  | rs7593981  | 38403041  | ARL6IP2  | intron 11              | p22.1  | AT | 0.4011 | 0.644 | 0.000325  |
| 4  | rs10517571 | 154534381 | MND1     | intron 4               | q31.3  | AC | 0.4354 | 1.527 | 0.0004464 |
| 12 | rs1565723  | 68683295  | RAB3IP   | 180046 base downstream | q15    | CT | 0.2609 | 0.589 | 0.0004326 |
| 1  | rs891373   | 205480867 | CD55     | 80572 base upstream    | q32.2  | CT | 0.4276 | 1.487 | 0.0008291 |
| 2  | rs7425554  | 83407484  | SUCLG1   | 1096680 base upstream  | p12    | CT | 0.5982 | 0.666 | 0.0005219 |
| 12 | rs7134411  | 68673713  | RAB3IP   | 170464 base downstream | q15    | CT | 0.7404 | 1.681 | 0.0004565 |
| 4  | rs3796632  | 140897320 | MAML3    | intron 3               | q31.1  | CT | 0.0258 | 2.752 | 0.0009648 |
| 12 | rs980891   | 60689368  | FAM19A2  | intron 4               | q14.1  | CT | 0.7268 | 0.654 | 0.0007546 |
| 12 | rs348696   | 60704889  | FAM19A2  | intron 4               | q14.1  | CT | 0.7257 | 0.656 | 0.0007658 |
| 1  | rs6604542  | 215512121 | GPATCH2  | 158335 base upstream   | q41    | AG | 0.5314 | 0.687 | 0.0009715 |



|    |            |           |          |                        |        |    |        |       |           |
|----|------------|-----------|----------|------------------------|--------|----|--------|-------|-----------|
| 13 | rs9513497  | 98303633  | DOCK9    | intron 21              | q32.3  | CT | 0.4673 | 1.493 | 0.0007326 |
| 7  | rs4730806  | 78868858  | MAGI2    | intron 21              | q21.11 | AC | 0.7134 | 0.668 | 0.000749  |
| 1  | rs12058997 | 48880413  | AGBL4    | intron 3               | p33    | CT | 0.0812 | 1.849 | 0.0008688 |
| 7  | rs7805990  | 147249143 | CNTNAP2  | intron 14              | q35    | GT | 0.6633 | 1.618 | 0.0007391 |
| 4  | rs1377287  | 72355439  | SLC4A4   | intron 3               | q13.3  | AG | 0.8981 | 0.536 | 0.0002989 |
| 4  | rs7683541  | 92459340  | TMSL3    | 480048 base downstream | q22.1  | CT | 0.7078 | 1.718 | 0.0003267 |
| 12 | rs1565725  | 68683857  | RAB3IP   | 180608 base downstream | q15    | CT | 0.7389 | 1.701 | 0.0004336 |
| 17 | rs902580   | 24510385  | MYO18A   | intron 40              | q11.2  | AC | 0.5468 | 1.547 | 0.0002975 |
| 10 | rs1270449  | 30256668  | KIAA1462 | 86721 base upstream    | p11.23 | CT | 0.7605 | 1.696 | 0.0007304 |
| 1  | rs4846404  | 215518894 | GPATCH2  | 151562 base upstream   | q41    | AG | 0.5318 | 0.687 | 0.0009202 |
| 7  | rs7805223  | 147248660 | CNTNAP2  | intron 14              | q35    | CT | 0.663  | 1.619 | 0.0007348 |
| 11 | rs17142739 | 81039330  | MGC33846 | 1081368 base upstream  | q14.1  | AC | 0.2373 | 1.55  | 0.0008271 |
| 1  | rs10863316 | 215512946 | GPATCH2  | 157510 base upstream   | q41    | CT | 0.4686 | 1.455 | 0.0009711 |
| 1  | rs11117833 | 215514615 | GPATCH2  | 155841 base upstream   | q41    | CT | 0.4651 | 1.462 | 0.0008857 |
| 1  | rs10863317 | 215513296 | GPATCH2  | 157160 base upstream   | q41    | AC | 0.5314 | 0.687 | 0.000971  |
| 4  | rs6825003  | 8386558   | HTRA3    | 26828 base downstream  | p16.1  | CT | 0.351  | 1.479 | 0.0007728 |
| 17 | rs6505114  | 24523266  | MYO18A   | intron 41              | q11.2  | AG | 0.5531 | 1.543 | 0.0003138 |
| 4  | rs7698375  | 10669107  | HS3ST1   | 339979 base upstream   | p16.1  | AG | 0.7854 | 0.64  | 0.0006671 |
| 1  | rs12741053 | 115209396 | SYCP1    | intron 8               | p13.2  | CT | 0.1243 | 1.689 | 0.000768  |
| 12 | rs1565724  | 68683835  | RAB3IP   | 180586 base downstream | q15    | AC | 0.261  | 0.589 | 0.0004331 |
| 1  | rs6666935  | 215517984 | GPATCH2  | 152472 base upstream   | q41    | CT | 0.5318 | 0.687 | 0.0009195 |
| 8  | rs12674947 | 4064166   | CSMD1    | intron 67              | p23.2  | AG | 0.96   | 0.441 | 0.0007123 |
| 11 | rs17142744 | 81039404  | MGC33846 | 1081294 base upstream  | q14.1  | GT | 0.2373 | 1.549 | 0.0008288 |
| 7  | rs7805492  | 147248774 | CNTNAP2  | intron 14              | q35    | CT | 0.6631 | 1.619 | 0.0007348 |
| 7  | rs12718319 | 49039292  | ABCA13   | 381655 base downstream | p12.3  | CT | 0.7605 | 0.64  | 0.0007381 |
| 2  | rs875654   | 38366214  | ARL6IP2  | 10413 base upstream    | p22.2  | CT | 0.1758 | 0.517 | 0.0004947 |
| 3  | rs10510834 | 60196556  | FHIT     | intron 5               | p14.2  | AG | 0.8129 | 1.91  | 0.0004274 |
| 7  | rs7805515  | 147248819 | CNTNAP2  | intron 14              | q35    | CT | 0.6632 | 1.618 | 0.0007378 |
| 1  | rs4436446  | 215509686 | GPATCH2  | 160770 base upstream   | q41    | CT | 0.5314 | 0.687 | 0.0009723 |
| 10 | rs604663   | 6544132   | PRKCCQ   | intron 4               | p15.1  | CT | 0.4502 | 0.651 | 0.0003581 |
| 11 | rs17142733 | 81037775  | MGC33846 | 1082923 base upstream  | q14.1  | AG | 0.7627 | 0.645 | 0.0008247 |
| 7  | rs2538957  | 147247057 | CNTNAP2  | intron 14              | q35    | CT | 0.6628 | 1.619 | 0.0007319 |
| 1  | rs7525530  | 205549789 | CD55     | 11650 base upstream    | q32.2  | AG | 0.5604 | 0.68  | 0.0009045 |
| 4  | rs3852108  | 154559969 | MND1     | 4276 base downstream   | q31.3  | AC | 0.5647 | 0.656 | 0.0004676 |
| 8  | rs6989132  | 127608781 | FAM84B   | 25087 base upstream    | q24.21 | CT | 0.1511 | 1.688 | 0.0004784 |
| 4  | rs6816883  | 92460094  | TMSL3    | 480802 base downstream | q22.1  | AG | 0.3154 | 0.608 | 0.0003334 |
| 1  | rs10863318 | 215513377 | GPATCH2  | 157079 base upstream   | q41    | AG | 0.5314 | 0.687 | 0.0009708 |

|    |            |           |           |                         |        |    |        |       |           |
|----|------------|-----------|-----------|-------------------------|--------|----|--------|-------|-----------|
| 1  | rs7532623  | 215516984 | GPATCH2   | 153472 base upstream    | q41    | CT | 0.4684 | 1.456 | 0.0009449 |
| 5  | rs346405   | 62549494  | LOC389293 | 440568 base downstream  | q12.1  | AC | 0.8742 | 2.176 | 0.0006101 |
| 3  | rs17024316 | 29757722  | RBMS3     | intron 5                | p24.1  | CG | 0.509  | 0.664 | 0.0005989 |
| 4  | rs4530647  | 127238127 | FAT4      | 604590 base downstream  | q28.1  | CT | 0.1393 | 1.677 | 0.0005453 |
| 22 | rs713876   | 23839747  | CRYBB3    | 86077 base upstream     | q11.23 | AG | 0.291  | 1.503 | 0.0008064 |
| 13 | rs9582269  | 98301752  | DOCK9     | intron 21               | q32.3  | AG | 0.1651 | 1.633 | 0.0005926 |
| 13 | rs2148775  | 89117527  | GPC5      | 1731360 base upstream   | q31.3  | CT | 0.0597 | 1.912 | 0.0009976 |
| 1  | rs12074981 | 215514042 | GPATCH2   | 156414 base upstream    | q41    | CT | 0.5314 | 0.687 | 0.0009704 |
| 18 | rs12454307 | 57445327  | CDH20     | 71982 base downstream   | q21.33 | CT | 0.2097 | 0.568 | 0.0005978 |
| 8  | rs7007303  | 126994033 | TRIB1     | 474209 base downstream  | q24.13 | AG | 0.6092 | 0.675 | 0.0009095 |
| 3  | rs1735538  | 129574792 | EEFSEC    | intron 6                | q21.3  | AG | 0.7386 | 1.622 | 0.0009659 |
| 4  | rs2904382  | 92539047  | TMSL3     | 559755 base downstream  | q22.1  | AG | 0.6997 | 1.642 | 0.000442  |
| 4  | rs955500   | 92464469  | TMSL3     | 485177 base downstream  | q22.1  | CT | 0.3163 | 0.611 | 0.0003346 |
| 10 | rs12571128 | 36637209  | FZD8      | 666841 base downstream  | p11.21 | AG | 0.9132 | 0.539 | 0.0005042 |
| 1  | rs12059973 | 215514427 | GPATCH2   | 156029 base upstream    | q41    | CT | 0.4686 | 1.455 | 0.0009705 |
| 14 | rs1544623  | 78030008  | NRXN3     | intron 1                | q24.3  | AG | 0.6079 | 0.678 | 0.0008413 |
| 13 | rs4772150  | 98305323  | DOCK9     | intron 22               | q32.3  | CT | 0.429  | 1.485 | 0.0008734 |
| 9  | rs12554461 | 4855256   | RCL1      | 4192 base downstream    | p24.1  | AG | 0.3145 | 0.644 | 0.0009996 |
| 18 | rs1377169  | 57433136  | CDH20     | 59791 base downstream   | q21.33 | AG | 0.786  | 1.753 | 0.000692  |
| 6  | rs4712556  | 20964682  | CDKAL1    | intron 9                | p22.3  | AG | 0.3347 | 1.488 | 0.0009469 |
| 1  | rs6688376  | 152592990 | ATP8B2    | 2587 base downstream    | q21.3  | CT | 0.7064 | 0.639 | 0.0007393 |
| 4  | rs12651062 | 116498891 | NDST4     | 244410 base downstream  | q26    | AG | 0.3168 | 1.524 | 0.0004199 |
| 5  | rs346420   | 62564968  | LOC389293 | 456042 base downstream  | q12.1  | GT | 0.1268 | 0.457 | 0.0006815 |
| 12 | rs2951468  | 60731556  | FAM19A2   | intron 4                | q14.1  | AC | 0.2615 | 1.539 | 0.0007555 |
| 16 | rs17205999 | 53285438  | IRX5      | 237173 base upstream    | q12.2  | AG | 0.3573 | 1.496 | 0.0006675 |
| 2  | rs10932782 | 219061439 | USP37     | intron 12               | q35    | CT | 0.3702 | 0.641 | 0.0006242 |
| 7  | rs2538959  | 147244691 | CNTNAP2   | intron 14               | q35    | GT | 0.6597 | 1.613 | 0.0008126 |
| 2  | rs7571743  | 219060816 | USP37     | intron 11               | q35    | CT | 0.3702 | 0.641 | 0.0006238 |
| 5  | rs346421   | 62565739  | LOC389293 | 456813 base downstream  | q12.1  | GT | 0.8731 | 2.191 | 0.0006858 |
| 13 | rs9536735  | 53936097  | OLFM4     | 1411910 base downstream | q21.1  | AG | 0.8756 | 2.239 | 0.0007985 |
| 1  | rs12567534 | 88273491  | PKN2      | 649018 base upstream    | p22.2  | AG | 0.6075 | 1.533 | 0.0006716 |
| 8  | rs2385503  | 126997191 | TRIB1     | 477367 base downstream  | q24.13 | AT | 0.39   | 1.483 | 0.0008874 |
| 5  | rs164105   | 62564201  | LOC389293 | 455275 base downstream  | q12.1  | AG | 0.1263 | 0.46  | 0.0006618 |
| 10 | rs678304   | 6544142   | PRKCQ     | intron 4                | p15.1  | CG | 0.5879 | 1.604 | 0.0004308 |
| 4  | rs6532290  | 92459948  | TMSL3     | 480656 base downstream  | q22.1  | GT | 0.6856 | 1.653 | 0.0003449 |
| 1  | rs11117836 | 215514934 | GPATCH2   | 155522 base upstream    | q41    | GT | 0.4686 | 1.455 | 0.00097   |
| 13 | rs7986477  | 98297352  | DOCK9     | intron 19               | q32.3  | AG | 0.8335 | 0.619 | 0.0007907 |

|    |            |           |           |                        |        |    |        |       |           |
|----|------------|-----------|-----------|------------------------|--------|----|--------|-------|-----------|
| 3  | rs6779932  | 29736947  | RBMS3     | intron 4               | p24.1  | GT | 0.6583 | 0.676 | 0.0008862 |
| 2  | rs6710383  | 219067929 | USP37     | intron 12              | q35    | GT | 0.6298 | 1.56  | 0.0006242 |
| 1  | rs6686201  | 205534725 | CD55      | 26714 base upstream    | q32.2  | AG | 0.5604 | 0.681 | 0.0009313 |
| 2  | rs4668508  | 6853536   | LOC129607 | 52367 base upstream    | p25.2  | AG | 0.2572 | 0.594 | 0.0007224 |
| 14 | rs1184875  | 37930129  | CLEC14A   | 134804 base downstream | q21.1  | AC | 0.428  | 0.664 | 0.0007775 |
| 1  | rs12133500 | 88272291  | PKN2      | 650218 base upstream   | p22.2  | CG | 0.3925 | 0.653 | 0.0006866 |
| 2  | rs10202238 | 38396294  | ARL6IP2   | intron 9               | p22.2  | CT | 0.3365 | 0.636 | 0.0006368 |
| 4  | rs11726082 | 127224194 | FAT4      | 590657 base downstream | q28.1  | CT | 0.862  | 0.601 | 0.0008    |
| 3  | rs1486796  | 151371682 | PFN2      | 200251 base downstream | q25.1  | CT | 0.197  | 0.558 | 0.0005957 |
| 10 | rs4934805  | 36634477  | FZD8      | 664109 base downstream | p11.21 | AG | 0.0868 | 1.858 | 0.0004729 |
| 8  | rs16902754 | 129318285 | MYC       | 495432 base downstream | q24.21 | AC | 0.0552 | 2.176 | 0.0005214 |
| 1  | rs2217406  | 205524041 | CD55      | 37398 base upstream    | q32.2  | AT | 0.5606 | 0.683 | 0.0009972 |
| 4  | rs6828907  | 116485614 | NDST4     | 231133 base downstream | q26    | CG | 0.6831 | 0.657 | 0.0004391 |
| 3  | rs7628950  | 60195347  | FHIT      | intron 5               | p14.2  | AT | 0.1866 | 0.525 | 0.0004696 |
| 2  | rs10200467 | 6855044   | LOC129607 | 50859 base upstream    | p25.2  | CT | 0.7431 | 1.664 | 0.0006955 |
| 13 | rs9582266  | 98294942  | DOCK9     | intron 18              | q32.3  | AG | 0.8333 | 0.621 | 0.0008397 |
| 8  | rs11990954 | 127612296 | FAM84B    | 21572 base upstream    | q24.21 | AC | 0.1488 | 1.691 | 0.0005056 |
| 1  | rs6675347  | 215516242 | GPATCH2   | 154214 base upstream   | q41    | CT | 0.4686 | 1.455 | 0.0009703 |
| 1  | rs7540354  | 215516892 | GPATCH2   | 153564 base upstream   | q41    | AG | 0.4686 | 1.454 | 0.0009705 |
| 2  | rs634590   | 219081012 | USP37     | intron 15              | q35    | AC | 0.6079 | 1.561 | 0.0006107 |
| 2  | rs2174865  | 17267063  | RAD51AP2  | 288403 base upstream   | p24.2  | CG | 0.3301 | 0.629 | 0.0005174 |
| 2  | rs1507986  | 17266477  | RAD51AP2  | 288989 base upstream   | p24.2  | CT | 0.3301 | 0.629 | 0.0005174 |
| 3  | rs1866773  | 29753247  | RBMS3     | intron 4               | p24.1  | CT | 0.4638 | 1.484 | 0.0005915 |
| 13 | rs9517467  | 98311123  | DOCK9     | intron 24              | q32.3  | AC | 0.5642 | 0.673 | 0.0007973 |
| 14 | rs1168555  | 37935967  | CLEC14A   | 140642 base downstream | q21.1  | AG | 0.5694 | 1.504 | 0.0009281 |
| 2  | rs11677772 | 17265222  | RAD51AP2  | 290244 base upstream   | p24.2  | GT | 0.3301 | 0.629 | 0.0005174 |
| 2  | rs2030357  | 17263874  | RAD51AP2  | 291592 base upstream   | p24.2  | AG | 0.3301 | 0.629 | 0.0005171 |
| 2  | rs2030358  | 17263810  | RAD51AP2  | 291656 base upstream   | p24.2  | CT | 0.6699 | 1.591 | 0.0005171 |
| 2  | rs7419572  | 17263221  | RAD51AP2  | 292245 base upstream   | p24.2  | AG | 0.6699 | 1.591 | 0.0005171 |
| 2  | rs1519968  | 17262967  | RAD51AP2  | 292499 base upstream   | p24.2  | AC | 0.3301 | 0.629 | 0.0005169 |
| 2  | rs16983357 | 17263402  | RAD51AP2  | 292064 base upstream   | p24.2  | CG | 0.6699 | 1.591 | 0.0005172 |
| 2  | rs11673738 | 17264870  | RAD51AP2  | 290596 base upstream   | p24.2  | AT | 0.6699 | 1.591 | 0.0005174 |
| 2  | rs11693140 | 17263551  | RAD51AP2  | 291915 base upstream   | p24.2  | AT | 0.3301 | 0.629 | 0.0005172 |
| 6  | rs9368246  | 20974836  | CDKAL1    | intron 9               | p22.3  | CT | 0.3346 | 1.488 | 0.0009582 |
| 4  | rs6857556  | 114747468 | CAMK2D    | intron 14              | q26    | AG | 0.0602 | 1.986 | 0.0008237 |
| 2  | rs1519969  | 17262933  | RAD51AP2  | 292533 base upstream   | p24.2  | AT | 0.6699 | 1.591 | 0.0005167 |
| 1  | rs4265406  | 88270563  | PKN2      | 651946 base upstream   | p22.2  | AG | 0.6075 | 1.531 | 0.0007016 |

|    |            |           |          |                        |        |    |        |       |           |
|----|------------|-----------|----------|------------------------|--------|----|--------|-------|-----------|
| 3  | rs16862540 | 151370478 | PFN2     | 199047 base downstream | q25.1  | CG | 0.8031 | 1.792 | 0.0005962 |
| 4  | rs12648320 | 92541356  | TMSL3    | 562064 base downstream | q22.1  | AC | 0.6828 | 1.631 | 0.0005082 |
| 22 | rs5752064  | 23850095  | CRYBB3   | 75729 base upstream    | q11.23 | CT | 0.7091 | 0.665 | 0.0007835 |
| 15 | rs11637847 | 31694343  | RYR3     | intron 19              | q14    | AG | 0.4124 | 0.662 | 0.0008922 |
| 11 | rs10160390 | 15157736  | INSC     | intron 5               | p15.2  | CT | 0.6242 | 1.554 | 0.0005706 |
| 20 | rs1569604  | 8456036   | PLCB1    | intron 3               | p12.3  | AG | 0.4472 | 0.652 | 0.0004929 |
| 8  | rs2169623  | 140499179 | KCNK9    | 194806 base upstream   | q24.3  | AG | 0.5346 | 0.677 | 0.0009219 |
| 2  | rs13020402 | 17267310  | RAD51AP2 | 288156 base upstream   | p24.2  | CT | 0.3301 | 0.629 | 0.0005174 |
| 7  | rs6943725  | 48310276  | ABCA13   | intron 21              | p12.3  | AG | 0.465  | 1.509 | 0.0005585 |
| 14 | rs1168554  | 37935713  | CLEC14A  | 140388 base downstream | q21.1  | AG | 0.5693 | 1.503 | 0.0009404 |
| 20 | rs4812022  | 56635234  | STX16    | 24499 base upstream    | q13.32 | CT | 0.8361 | 1.959 | 0.0007733 |
| 4  | rs11731526 | 127224550 | FAT4     | 591013 base downstream | q28.1  | CG | 0.862  | 0.601 | 0.0007996 |
| 4  | rs7655124  | 116472360 | NDST4    | 217879 base downstream | q26    | CT | 0.317  | 1.519 | 0.0004573 |
| 2  | rs7601872  | 219028129 | USP37    | intron 1               | q35    | CG | 0.6225 | 1.536 | 0.0007453 |
| 21 | rs2252991  | 36478878  | DOPEY2   | intron 2               | q22.12 | AG | 0.2964 | 0.625 | 0.0009227 |
| 9  | rs11789876 | 2705349   | KCNV2    | 2176 base upstream     | p24.2  | CT | 0.6765 | 1.602 | 0.0003909 |
| 2  | rs13031560 | 17251771  | RAD51AP2 | 303695 base upstream   | p24.2  | CT | 0.67   | 1.59  | 0.000522  |
| 4  | rs12650886 | 116481279 | NDST4    | 226798 base downstream | q26    | CT | 0.3617 | 1.502 | 0.0005009 |
| 4  | rs987157   | 28926641  | PCDH7    | 1404493 base upstream  | p15.1  | AG | 0.111  | 1.813 | 0.000576  |
| 3  | rs1386291  | 151376909 | PFN2     | 205478 base downstream | q25.1  | CT | 0.8025 | 1.793 | 0.0005918 |
| 2  | rs12467252 | 17248139  | RAD51AP2 | 307327 base upstream   | p24.2  | CT | 0.3299 | 0.63  | 0.0005451 |
| 8  | rs9693045  | 129316558 | MYC      | 493705 base downstream | q24.21 | CT | 0.0552 | 2.175 | 0.0005227 |
| 2  | rs3755042  | 219025492 | USP37    | EXON 1                 | q35    | CT | 0.3776 | 0.651 | 0.0007437 |
| 2  | rs3731867  | 219180978 | PLCD4    | EXON 1                 | q35    | AG | 0.376  | 0.645 | 0.000612  |
| 14 | rs1186370  | 37936185  | CLEC14A  | 140860 base downstream | q21.1  | AG | 0.5696 | 1.505 | 0.0009154 |
| 2  | rs2710246  | 219242138 | RNF25    | intron 9               | q35    | CT | 0.376  | 0.64  | 0.0005051 |
| 2  | rs4674314  | 219131764 | USP37    | intron 23              | q35    | CT | 0.3778 | 0.65  | 0.0007202 |
| 2  | rs10495660 | 17260029  | RAD51AP2 | 295437 base upstream   | p24.2  | GT | 0.6699 | 1.591 | 0.0005167 |
| 2  | rs664514   | 219038063 | USP37    | intron 5               | q35    | AG | 0.3716 | 0.646 | 0.0007343 |
| 2  | rs4674308  | 219018727 | VIL1     | intron 18              | q35    | AC | 0.3776 | 0.651 | 0.0007397 |
| 2  | rs3845835  | 219050528 | USP37    | intron 8               | q35    | CT | 0.3775 | 0.651 | 0.0007509 |
| 17 | rs12452739 | 24496369  | MYO18A   | intron 40              | q11.2  | AG | 0.3202 | 0.607 | 0.0006282 |
| 18 | rs11876431 | 57438389  | CDH20    | 65044 base downstream  | q21.33 | AG | 0.7921 | 1.735 | 0.0008113 |
| 14 | rs11844960 | 78084707  | NRXN3    | intron 1               | q24.3  | AC | 0.4131 | 1.478 | 0.0009047 |
| 2  | rs11898524 | 17250287  | RAD51AP2 | 305179 base upstream   | p24.2  | CT | 0.6701 | 1.589 | 0.0005325 |
| 11 | rs4597100  | 117191666 | FXVD2    | 4333 base upstream     | q23.3  | AC | 0.4016 | 0.646 | 0.000703  |
| 2  | rs11893015 | 17250643  | RAD51AP2 | 304823 base upstream   | p24.2  | CT | 0.3299 | 0.629 | 0.0005238 |

|    |            |           |           |                        |        |    |        |       |           |
|----|------------|-----------|-----------|------------------------|--------|----|--------|-------|-----------|
| 2  | rs1983375  | 17289256  | RAD51AP2  | 266210 base upstream   | p24.2  | CT | 0.1612 | 0.537 | 0.0009996 |
| 8  | rs10505507 | 129311983 | MYC       | 489130 base downstream | q24.21 | CT | 0.0552 | 2.17  | 0.0005449 |
| 2  | rs13018947 | 17267368  | RAD51AP2  | 288098 base upstream   | p24.2  | CG | 0.6699 | 1.591 | 0.0005174 |
| 10 | rs4303189  | 125987432 | OAT       | 88429 base upstream    | q26.13 | AG | 0.0395 | 2.357 | 0.0009687 |
| 2  | rs17572485 | 219004789 | VIL1      | intron 9               | q35    | AG | 0.3774 | 0.651 | 0.0007547 |
| 1  | rs7535028  | 215523070 | GPATCH2   | 147386 base upstream   | q41    | GT | 0.4991 | 1.459 | 0.0009272 |
| 2  | rs747193   | 13999212  | FAM84A    | 691094 base upstream   | p24.3  | AG | 0.8955 | 0.533 | 0.0005929 |
| 2  | rs10200507 | 219044188 | USP37     | intron 6               | q35    | AC | 0.3775 | 0.651 | 0.0007486 |
| 8  | rs7840538  | 129311457 | MYC       | 488604 base downstream | q24.21 | CG | 0.0552 | 2.169 | 0.0005469 |
| 1  | rs1536127  | 199353517 | CACNA1S   | 5200 base downstream   | q32.1  | AC | 0.2446 | 1.569 | 0.0008931 |
| 2  | rs11674840 | 17261376  | RAD51AP2  | 294090 base upstream   | p24.2  | AG | 0.2123 | 0.547 | 0.0004859 |
| 2  | rs1589272  | 17253381  | RAD51AP2  | 302085 base upstream   | p24.2  | AG | 0.7877 | 1.83  | 0.0004874 |
| 8  | rs10104031 | 140497072 | KCNK9     | 196913 base upstream   | q24.3  | CT | 0.2339 | 1.531 | 0.0009582 |
| 16 | rs10500520 | 64006260  | LOC283867 | intron 7               | q21    | AG | 0.9304 | 0.538 | 0.0009109 |
| 16 | rs17439546 | 64006980  | LOC283867 | intron 7               | q21    | CT | 0.9304 | 0.539 | 0.0009237 |
| 8  | rs7812998  | 129307851 | MYC       | 484998 base downstream | q24.21 | AG | 0.0552 | 2.168 | 0.0005525 |
| 2  | rs7574429  | 219207003 | PLCD4     | intron 11              | q35    | GT | 0.6241 | 1.551 | 0.0006067 |
| 22 | rs875352   | 23875909  | CRYBB3    | 49915 base upstream    | q11.23 | CG | 0.2845 | 0.624 | 0.0007203 |
| 14 | rs1015964  | 78086868  | NRXN3     | intron 1               | q24.3  | AG | 0.5871 | 0.676 | 0.0009    |
| 8  | rs2447553  | 140501955 | KCNK9     | 192030 base upstream   | q24.3  | CT | 0.5345 | 0.676 | 0.0008886 |
| 22 | rs9624730  | 23876617  | CRYBB3    | 49207 base upstream    | q11.23 | CT | 0.7156 | 1.601 | 0.0007227 |
| 7  | rs10246267 | 103388421 | RELN      | intron 64              | q22.1  | CT | 0.0526 | 2.059 | 0.0008913 |
| 2  | rs3770214  | 219217232 | ZNF142    | EXON 3                 | q35    | CT | 0.624  | 1.55  | 0.0006133 |
| 22 | rs9624734  | 23878986  | CRYBB3    | 46838 base upstream    | q11.23 | CT | 0.7157 | 1.601 | 0.0007289 |
| 4  | rs6532296  | 92469018  | TMSL3     | 489726 base downstream | q22.1  | AG | 0.6863 | 1.613 | 0.0004939 |
| 2  | rs585185   | 219165985 | RQCD1     | intron 7               | q35    | AG | 0.638  | 1.572 | 0.0006116 |
| 4  | rs6853566  | 116438169 | NDST4     | 183688 base downstream | q26    | CT | 0.6825 | 0.662 | 0.0005222 |
| 11 | rs12278218 | 113509338 | ZBTB16    | intron 2               | q23.2  | CT | 0.8998 | 0.554 | 0.0008695 |
| 2  | rs832798   | 219173054 | RQCD1     | 5812 base downstream   | q35    | AG | 0.6235 | 1.543 | 0.0006774 |
| 22 | rs9624735  | 23879405  | CRYBB3    | 46419 base upstream    | q11.23 | AG | 0.2842 | 0.625 | 0.0007358 |
| 11 | rs12419599 | 123073614 | ZNF202    | 26592 base upstream    | q24.1  | GT | 0.9502 | 0.474 | 0.0006869 |
| 4  | rs17686110 | 116456988 | NDST4     | 202507 base downstream | q26    | AC | 0.3173 | 1.514 | 0.00049   |
| 11 | rs4406833  | 123073674 | ZNF202    | 26532 base upstream    | q24.1  | AT | 0.9504 | 0.472 | 0.000647  |
| 1  | rs10158471 | 215522526 | GPATCH2   | 147930 base upstream   | q41    | AG | 0.5008 | 0.685 | 0.0009194 |
| 8  | rs2468726  | 140503436 | KCNK9     | 190549 base upstream   | q24.3  | CG | 0.4654 | 1.481 | 0.0009348 |
| 4  | rs10434023 | 116441466 | NDST4     | 186985 base downstream | q26    | CT | 0.3175 | 1.51  | 0.0005198 |
| 4  | rs6535917  | 154568191 | MND1      | 12498 base downstream  | q31.3  | AG | 0.4155 | 1.505 | 0.0009343 |

|    |            |           |           |                        |        |    |        |       |           |
|----|------------|-----------|-----------|------------------------|--------|----|--------|-------|-----------|
| 8  | rs16901493 | 127614227 | FAM84B    | 19641 base upstream    | q24.21 | GT | 0.1488 | 1.693 | 0.0005138 |
| 16 | rs17530421 | 64011536  | LOC283867 | intron 7               | q21    | CT | 0.9304 | 0.54  | 0.0009701 |
| 2  | rs7603816  | 219104499 | USP37     | intron 17              | q35    | CT | 0.6286 | 1.548 | 0.0007443 |
| 22 | rs6004454  | 23885789  | CRYBB3    | 40035 base upstream    | q11.23 | AG | 0.2837 | 0.626 | 0.0007556 |
| 1  | rs6604663  | 215504627 | GPATCH2   | 165829 base upstream   | q41    | AG | 0.5009 | 0.687 | 0.0009876 |
| 4  | rs1528579  | 92528251  | TMSL3     | 548959 base downstream | q22.1  | AT | 0.2938 | 0.608 | 0.0004957 |
| 8  | rs16902742 | 129304629 | MYC       | 481776 base downstream | q24.21 | AG | 0.0552 | 2.165 | 0.0005669 |
| 11 | rs10488696 | 113508557 | ZBTB16    | intron 2               | q23.2  | AG | 0.1    | 1.809 | 0.0008457 |
| 11 | rs1275055  | 123076941 | ZNF202    | 23265 base upstream    | q24.1  | AT | 0.9498 | 0.473 | 0.0007025 |
| 12 | rs348692   | 60709833  | FAM19A2   | intron 4               | q14.1  | AG | 0.2701 | 1.516 | 0.0009855 |
| 22 | rs875353   | 23875612  | CRYBB3    | 50212 base upstream    | q11.23 | AG | 0.2847 | 0.624 | 0.0007118 |
| 2  | rs636723   | 219081441 | USP37     | intron 15              | q35    | AG | 0.3774 | 0.651 | 0.0007551 |
| 5  | rs4921230  | 158812974 | IL12B     | 122915 base downstream | q33.3  | CT | 0.7721 | 1.715 | 0.0005594 |
| 2  | rs620596   | 219170663 | RQCD1     | 3421 base downstream   | q35    | AG | 0.6233 | 1.54  | 0.0007112 |
| 14 | rs10483907 | 78085918  | NRXN3     | intron 1               | q24.3  | AG | 0.413  | 1.479 | 0.000903  |
| 18 | rs12454424 | 57455491  | CDH20     | 82146 base downstream  | q21.33 | AG | 0.2047 | 0.574 | 0.0009429 |
| 2  | rs662250   | 219082361 | USP37     | intron 15              | q35    | AT | 0.6226 | 1.536 | 0.0007555 |
| 2  | rs6717433  | 219083955 | USP37     | intron 16              | q35    | CG | 0.3774 | 0.651 | 0.0007564 |
| 4  | rs1881454  | 92484643  | TMSL3     | 505351 base downstream | q22.1  | CG | 0.6856 | 1.612 | 0.0004883 |
| 2  | rs526897   | 219141841 | RQCD1     | 80 base upstream       | q35    | AG | 0.6228 | 1.533 | 0.0007833 |
| 4  | rs10856885 | 92528566  | TMSL3     | 549274 base downstream | q22.1  | CT | 0.2939 | 0.61  | 0.0005191 |
| 4  | rs1507942  | 116462047 | NDST4     | 207566 base downstream | q26    | AT | 0.317  | 1.515 | 0.0005612 |
| 22 | rs16979674 | 23885283  | CRYBB3    | 40541 base upstream    | q11.23 | AG | 0.2632 | 0.618 | 0.0008486 |
| 2  | rs496674   | 219140813 | USP37     | intron 25              | q35    | AG | 0.6228 | 1.534 | 0.0007747 |
| 18 | rs12457154 | 57455551  | CDH20     | 82206 base downstream  | q21.33 | AG | 0.7953 | 1.743 | 0.0009452 |
| 22 | rs6004449  | 23880247  | CRYBB3    | 45577 base upstream    | q11.23 | AG | 0.716  | 1.599 | 0.0007432 |
| 2  | rs7583449  | 219111266 | USP37     | intron 18              | q35    | AC | 0.6227 | 1.535 | 0.0007643 |
| 2  | rs523305   | 219110935 | USP37     | intron 18              | q35    | CT | 0.6227 | 1.535 | 0.000764  |
| 2  | rs599973   | 219095517 | USP37     | intron 16              | q35    | CG | 0.3774 | 0.651 | 0.0007599 |
| 22 | rs16979684 | 23890601  | CRYBB3    | 35223 base upstream    | q11.23 | AC | 0.7161 | 1.599 | 0.0007317 |
| 4  | rs6820807  | 92530648  | TMSL3     | 551356 base downstream | q22.1  | AT | 0.294  | 0.61  | 0.0005299 |
| 2  | rs3770213  | 219216616 | ZNF142    | EXON 3                 | q35    | AT | 0.6191 | 1.546 | 0.0007043 |
| 4  | rs6841781  | 92489733  | TMSL3     | 510441 base downstream | q22.1  | CT | 0.6855 | 1.61  | 0.000493  |
| 2  | rs490483   | 219137296 | USP37     | intron 25              | q35    | AT | 0.3773 | 0.652 | 0.0007708 |
| 14 | rs10431730 | 78012231  | NRXN3     | intron 1               | q24.3  | AG | 0.6097 | 0.665 | 0.0006592 |
| 2  | rs687747   | 219107871 | USP37     | intron 18              | q35    | CT | 0.6226 | 1.535 | 0.0007624 |
| 4  | rs7654013  | 92510260  | TMSL3     | 530968 base downstream | q22.1  | GT | 0.7126 | 1.666 | 0.0005414 |

|    |            |           |          |                        |        |    |        |       |           |
|----|------------|-----------|----------|------------------------|--------|----|--------|-------|-----------|
| 2  | rs523937   | 219145840 | RQCD1    | intron 1               | q35    | CG | 0.6228 | 1.533 | 0.0007834 |
| 2  | rs3770216  | 219151961 | RQCD1    | intron 1               | q35    | AG | 0.6228 | 1.533 | 0.0007834 |
| 22 | rs7285325  | 23895420  | CRYBB3   | 30404 base upstream    | q11.23 | AG | 0.2634 | 0.617 | 0.0008413 |
| 2  | rs576901   | 219132608 | USP37    | intron 23              | q35    | AG | 0.3773 | 0.652 | 0.0007677 |
| 2  | rs630858   | 219117933 | USP37    | intron 18              | q35    | AC | 0.6227 | 1.535 | 0.0007652 |
| 2  | rs12619347 | 219128179 | USP37    | intron 22              | q35    | CT | 0.3773 | 0.651 | 0.000766  |
| 4  | rs13147974 | 13322444  | FAM44A   | 84018 base downstream  | p15.33 | CG | 0.5855 | 1.533 | 0.00066   |
| 18 | rs2587634  | 37373309  | PIK3C3   | 415887 base upstream   | q12.3  | CT | 0.3206 | 1.494 | 0.0007925 |
| 18 | rs2587632  | 37374178  | PIK3C3   | 415018 base upstream   | q12.3  | CT | 0.321  | 1.496 | 0.0007881 |
| 21 | rs363569   | 29954574  | GRIK1    | intron 12              | q21.3  | CT | 0.9627 | 0.441 | 0.0006906 |
| 21 | rs7280245  | 33678481  | IFNGR2   | 18590 base upstream    | q22.11 | AG | 0.8434 | 0.594 | 0.0005271 |
| 2  | rs6760584  | 83410251  | SUCLG1   | 1093913 base upstream  | p12    | GT | 0.3991 | 1.478 | 0.0008855 |
| 10 | rs7913128  | 9906737   | CUGBP2   | 1180527 base upstream  | p14    | AG | 0.8735 | 0.58  | 0.0009141 |
| 18 | rs2612339  | 37368108  | PIK3C3   | 421088 base upstream   | q12.3  | AG | 0.3203 | 1.492 | 0.0007942 |
| 22 | rs16979683 | 23890579  | CRYBB3   | 35245 base upstream    | q11.23 | AC | 0.7161 | 1.599 | 0.0007301 |
| 21 | rs12329794 | 33674908  | IFNAR1   | 20912 base downstream  | q22.11 | AG | 0.1565 | 1.683 | 0.0005168 |
| 7  | rs826802   | 146666000 | CNTNAP2  | intron 9               | q35    | GT | 0.6825 | 1.58  | 0.0007718 |
| 4  | rs6532299  | 92470862  | TMSL3    | 491570 base downstream | q22.1  | CT | 0.3137 | 0.62  | 0.0004982 |
| 2  | rs11894455 | 38371019  | ARL6IP2  | 5608 base upstream     | p22.2  | CT | 0.6104 | 1.505 | 0.0008666 |
| 13 | rs9519490  | 104284662 | DAOA     | 631702 base upstream   | q33.2  | CT | 0.2049 | 1.59  | 0.0007517 |
| 7  | rs849766   | 12646159  | SCIN     | intron 10              | p21.3  | GT | 0.1185 | 1.798 | 0.000792  |
| 18 | rs2848770  | 37368855  | PIK3C3   | 420341 base upstream   | q12.3  | AG | 0.3204 | 1.493 | 0.0007932 |
| 14 | rs727208   | 78050487  | NRXN3    | intron 1               | q24.3  | AC | 0.4128 | 1.475 | 0.0009097 |
| 14 | rs11622407 | 78058257  | NRXN3    | intron 1               | q24.3  | GT | 0.413  | 1.475 | 0.0009133 |
| 2  | rs2098446  | 51334759  | NRXN1    | 221581 base downstream | p16.3  | AG | 0.3593 | 1.494 | 0.0007645 |
| 2  | rs562510   | 219151245 | RQCD1    | intron 1               | q35    | AC | 0.3772 | 0.652 | 0.0007833 |
| 22 | rs6004456  | 23885948  | CRYBB3   | 39876 base upstream    | q11.23 | AG | 0.2963 | 0.625 | 0.000829  |
| 2  | rs3755041  | 219150743 | RQCD1    | intron 1               | q35    | AT | 0.6228 | 1.533 | 0.0007835 |
| 7  | rs4370447  | 145214888 | CNTNAP2  | 229497 base upstream   | q35    | AG | 0.9241 | 0.531 | 0.0008532 |
| 17 | rs1388175  | 24488142  | MYO18A   | intron 40              | q11.2  | AC | 0.4539 | 0.66  | 0.0005601 |
| 2  | rs2098441  | 51330460  | NRXN1    | 217282 base downstream | p16.3  | AG | 0.6406 | 0.67  | 0.0007685 |
| 4  | rs4593093  | 92480699  | TMSL3    | 501407 base downstream | q22.1  | GT | 0.3143 | 0.62  | 0.0004862 |
| 21 | rs2832424  | 29945121  | GRIK1    | intron 10              | q21.3  | AC | 0.9627 | 0.442 | 0.0007279 |
| 3  | rs1371846  | 29736653  | RBMS3    | intron 4               | p24.1  | AC | 0.693  | 0.664 | 0.0006261 |
| 14 | rs11159368 | 78048416  | NRXN3    | intron 1               | q24.3  | AC | 0.5873 | 0.679 | 0.000966  |
| 2  | rs6712339  | 17296529  | RAD51AP2 | 258937 base upstream   | p24.2  | CT | 0.8355 | 1.877 | 0.0009064 |
| 3  | rs6780134  | 29737133  | RBMS3    | intron 4               | p24.1  | AG | 0.3071 | 1.505 | 0.0006306 |

|    |            |           |          |                        |        |    |        |       |           |
|----|------------|-----------|----------|------------------------|--------|----|--------|-------|-----------|
| 11 | rs1938928  | 86022325  | ME3      | intron 13              | q14.2  | CT | 0.0836 | 1.818 | 0.0009759 |
| 14 | rs11159367 | 78048326  | NRXN3    | intron 1               | q24.3  | AG | 0.5873 | 0.68  | 0.0009798 |
| 3  | rs1371844  | 29736510  | RBMS3    | intron 4               | p24.1  | CT | 0.6931 | 0.664 | 0.0006233 |
| 14 | rs11625200 | 77999119  | NRXN3    | intron 1               | q24.3  | AC | 0.386  | 1.491 | 0.0007936 |
| 14 | rs10782463 | 78048235  | NRXN3    | intron 1               | q24.3  | CT | 0.4127 | 1.471 | 0.0009919 |
| 9  | rs2376398  | 76896764  | OSTF1    | intron 1               | q21.13 | CT | 0.3991 | 0.643 | 0.0009438 |
| 2  | rs647990   | 219149672 | RQCD1    | intron 1               | q35    | CT | 0.6234 | 1.53  | 0.0008396 |
| 14 | rs11626916 | 78048581  | NRXN3    | intron 1               | q24.3  | AG | 0.5873 | 0.679 | 0.0009606 |
| 9  | rs1454629  | 2690620   | KCNV2    | 16905 base upstream    | p24.2  | CT | 0.6754 | 1.577 | 0.0008215 |
| 2  | rs3755025  | 38374562  | ARL6IP2  | 2065 base upstream     | p22.2  | CT | 0.3918 | 0.665 | 0.000888  |
| 11 | rs12289252 | 86016483  | ME3      | intron 13              | q14.2  | GT | 0.9164 | 0.55  | 0.0009758 |
| 2  | rs578450   | 219109481 | USP37    | intron 18              | q35    | CT | 0.3868 | 0.652 | 0.0008504 |
| 17 | rs7219630  | 24474555  | MYO18A   | intron 40              | q11.2  | AG | 0.4537 | 0.663 | 0.0006304 |
| 21 | rs363586   | 29943925  | GRIK1    | intron 10              | q21.3  | GT | 0.0375 | 2.221 | 0.00098   |
| 17 | rs882729   | 24474102  | MYO18A   | intron 40              | q11.2  | CT | 0.5463 | 1.508 | 0.0006341 |
| 3  | rs6783723  | 29738242  | RBMS3    | intron 4               | p24.1  | AG | 0.3076 | 1.505 | 0.0006423 |
| 16 | rs2220233  | 75607795  | MON1B    | 174541 base upstream   | q23.1  | CT | 0.2545 | 0.617 | 0.0008844 |
| 7  | rs849764   | 12644156  | SCIN     | intron 10              | p21.3  | CG | 0.8813 | 0.555 | 0.0007983 |
| 2  | rs13417898 | 38369932  | ARL6IP2  | 6695 base upstream     | p22.2  | CT | 0.3727 | 0.651 | 0.0007007 |
| 11 | rs1540176  | 81032483  | MGC33846 | 1088215 base upstream  | q14.1  | CT | 0.3962 | 0.636 | 0.0007679 |
| 18 | rs2848760  | 37360470  | PIK3C3   | 428726 base upstream   | q12.3  | AG | 0.6802 | 0.672 | 0.0008328 |
| 8  | rs1514708  | 19199623  | SH2D4A   | 15863 base upstream    | p21.3  | CG | 0.0408 | 2.173 | 0.0009791 |
| 18 | rs2848768  | 37367434  | PIK3C3   | 421762 base upstream   | q12.3  | CT | 0.6801 | 0.672 | 0.0008281 |
| 2  | rs4670861  | 38374360  | ARL6IP2  | 2267 base upstream     | p22.2  | CT | 0.3918 | 0.665 | 0.0008913 |
| 11 | rs2155035  | 86021251  | ME3      | intron 13              | q14.2  | AG | 0.0836 | 1.818 | 0.0009722 |
| 18 | rs2612343  | 37365054  | PIK3C3   | 424142 base upstream   | q12.3  | CT | 0.6801 | 0.671 | 0.0008279 |
| 18 | rs2703183  | 37362872  | PIK3C3   | 426324 base upstream   | q12.3  | AT | 0.6801 | 0.671 | 0.0008276 |
| 18 | rs2703176  | 37363038  | PIK3C3   | 426158 base upstream   | q12.3  | CT | 0.3199 | 1.489 | 0.0008276 |
| 4  | rs6533856  | 116495156 | NDST4    | 240675 base downstream | q26    | GT | 0.3201 | 1.496 | 0.0007238 |
| 2  | rs287293   | 17251821  | RAD51AP2 | 303645 base upstream   | p24.2  | CT | 0.8386 | 1.862 | 0.0009714 |
| 18 | rs2612344  | 37365020  | PIK3C3   | 424176 base upstream   | q12.3  | CT | 0.3199 | 1.489 | 0.0008279 |
| 2  | rs13420545 | 51341929  | NRXN1    | 228751 base downstream | p16.3  | CT | 0.6436 | 0.668 | 0.0009116 |
| 18 | rs2587615  | 37364633  | PIK3C3   | 424563 base upstream   | q12.3  | CT | 0.3199 | 1.489 | 0.0008277 |
| 2  | rs6720403  | 219002502 | VIL1     | intron 6               | q35    | AC | 0.6219 | 1.541 | 0.000689  |
| 2  | rs3821031  | 219003493 | VIL1     | intron 8               | q35    | CT | 0.622  | 1.541 | 0.0006956 |
| 18 | rs2848767  | 37366646  | PIK3C3   | 422550 base upstream   | q12.3  | CT | 0.3199 | 1.489 | 0.0008279 |
| 18 | rs2848766  | 37366392  | PIK3C3   | 422804 base upstream   | q12.3  | AG | 0.3199 | 1.489 | 0.0008279 |



|    |            |           |          |                        |        |    |        |       |           |
|----|------------|-----------|----------|------------------------|--------|----|--------|-------|-----------|
| 2  | rs287300   | 17263732  | RAD51AP2 | 291734 base upstream   | p24.2  | AG | 0.8385 | 1.863 | 0.0009633 |
| 11 | rs10898515 | 86018768  | ME3      | intron 13              | q14.2  | CT | 0.9164 | 0.549 | 0.0009619 |
| 21 | rs363550   | 29968170  | GRIK1    | intron 13              | q21.3  | CG | 0.9625 | 0.441 | 0.0007736 |
| 9  | rs11793747 | 2705284   | KCNV2    | 2241 base upstream     | p24.2  | CG | 0.3249 | 0.635 | 0.0005772 |
| 2  | rs484687   | 17222881  | RAD51AP2 | 332585 base upstream   | p24.2  | CT | 0.8461 | 1.959 | 0.0008353 |
| 5  | rs1455845  | 114715541 | CCDC112  | 55184 base downstream  | q22.3  | AG | 0.1007 | 1.78  | 0.0009561 |
| 3  | rs4679648  | 60194354  | FHIT     | intron 5               | p14.2  | CT | 0.1838 | 0.548 | 0.0009246 |
| 7  | rs12703745 | 145228893 | CNTNAP2  | 215492 base upstream   | q35    | AG | 0.0754 | 1.868 | 0.000997  |
| 2  | rs10497382 | 172973708 | ITGA6    | 26851 base upstream    | q31.1  | CT | 0.8181 | 0.599 | 0.0007119 |
| 17 | rs9890077  | 45486459  | ITGA3    | 2270 base upstream     | q21.33 | AG | 0.8864 | 0.579 | 0.0008887 |
| 5  | rs7701924  | 114734342 | CCDC112  | 73985 base downstream  | q22.3  | AG | 0.1002 | 1.755 | 0.0009822 |
| 10 | rs11593067 | 122962348 | FGFR2    | 265497 base upstream   | q26.12 | CT | 0.5312 | 0.675 | 0.0008253 |
| 4  | rs2091765  | 92557826  | TMSL3    | 578534 base downstream | q22.1  | AG | 0.3115 | 0.618 | 0.0006753 |
| 17 | rs4965417  | 24442232  | MYO18A   | intron 8               | q11.2  | CT | 0.4585 | 0.667 | 0.000742  |
| 4  | rs7672281  | 92549378  | TMSL3    | 570086 base downstream | q22.1  | AC | 0.3113 | 0.619 | 0.0007032 |
| 17 | rs4795495  | 24438034  | MYO18A   | intron 4               | q11.2  | CG | 0.4586 | 0.667 | 0.0007379 |
| 3  | rs11924206 | 14908226  | FGD5     | intron 4               | p24.3  | GT | 0.7559 | 0.666 | 0.0009021 |
| 17 | rs4794094  | 45487642  | ITGA3    | 1087 base upstream     | q21.33 | CT | 0.1137 | 1.726 | 0.0008834 |
| 2  | rs972337   | 60184903  | BCL11A   | 346902 base upstream   | p16.1  | CT | 0.5692 | 0.656 | 0.0008451 |
| 4  | rs4301075  | 92549226  | TMSL3    | 569934 base downstream | q22.1  | AT | 0.3112 | 0.619 | 0.0007168 |
| 5  | rs10060558 | 114739103 | CCDC112  | 78746 base downstream  | q22.3  | CT | 0.1001 | 1.753 | 0.0009659 |
| 16 | rs1485793  | 75659337  | MON1B    | 122999 base upstream   | q23.1  | AG | 0.7423 | 1.613 | 0.0009969 |
| 5  | rs17137669 | 114736927 | CCDC112  | 76570 base downstream  | q22.3  | AG | 0.1002 | 1.749 | 0.0009901 |
| 11 | rs4430519  | 123073531 | ZNF202   | 26675 base upstream    | q24.1  | GT | 0.9492 | 0.486 | 0.0009889 |
| 20 | rs6067766  | 49473493  | NFATC2   | intron 2               | q13.2  | AG | 0.1195 | 0.439 | 0.0009623 |
| 4  | rs4521314  | 72303517  | SLC4A4   | intron 1               | q13.3  | AC | 0.1123 | 2.101 | 4.19E-06  |
| 19 | rs12462673 | 56890466  | HAS1     | 17710 base upstream    | q13.33 | AG | 0.9729 | 0.314 | 8.85E-06  |
| 4  | rs4311283  | 74585279  | AFM      | intron 12              | q13.3  | CT | 0.9732 | 0.322 | 0.0001108 |
| 13 | rs1327342  | 89121163  | GPC5     | 1727724 base upstream  | q31.3  | CG | 0.9741 | 0.35  | 0.0001396 |
| 6  | rs9474262  | 52599645  | TMEM14A  | 44197 base upstream    | p12.2  | CT | 0.0383 | 2.616 | 0.0001447 |
| 11 | rs11605616 | 131483057 | HNT      | intron 2               | q25    | CG | 0.9901 | 0.178 | 0.0001737 |
| 20 | rs2143205  | 8459004   | PLCB1    | intron 3               | p12.3  | CT | 0.4991 | 1.604 | 0.0001827 |
| 20 | rs2423364  | 8464695   | PLCB1    | intron 3               | p12.3  | CT | 0.3113 | 0.593 | 0.0001909 |
| 5  | rs32973    | 115859204 | SEMA6A   | intron 14              | q23.1  | AG | 0.6409 | 0.646 | 0.0002224 |
| 10 | rs17135903 | 3888018   | KLF6     | 70563 base downstream  | p15.1  | CT | 0.9923 | 0.149 | 0.0002328 |
| 20 | rs2423366  | 8465451   | PLCB1    | intron 3               | p12.3  | AG | 0.3099 | 0.6   | 0.0002333 |
| 6  | rs1884456  | 52612989  | TMEM14A  | 30853 base upstream    | p12.1  | AG | 0.0344 | 2.532 | 0.0002409 |

|    |            |           |         |                        |        |    |        |       |           |
|----|------------|-----------|---------|------------------------|--------|----|--------|-------|-----------|
| 10 | rs6482659  | 129848954 | MKI67   | 34309 base downstream  | q26.2  | AC | 0.3008 | 1.605 | 0.0002476 |
| 15 | rs8027032  | 58790190  | RORA    | intron 10              | q22.2  | CT | 0.2106 | 0.512 | 0.0002557 |
| 14 | rs10133971 | 94392551  | GSC     | 86299 base downstream  | q32.13 | CT | 0.9358 | 0.467 | 0.0002586 |
| 4  | rs17710298 | 55661374  | KDR     | intron 15              | q12    | CT | 0.9784 | 0.338 | 0.0002655 |
| 6  | rs9474264  | 52600553  | TMEM14A | 43289 base upstream    | p12.1  | AT | 0.0344 | 2.528 | 0.0002673 |
| 6  | rs9463804  | 52591585  | TRAM2   | 41764 base downstream  | p12.2  | AT | 0.9656 | 0.396 | 0.0002797 |
| 6  | rs9474257  | 52589637  | TRAM2   | 39816 base downstream  | p12.2  | GT | 0.0344 | 2.526 | 0.0002823 |
| 2  | rs13032715 | 40178533  | SLC8A1  | 14256 base upstream    | p22.1  | CT | 0.4345 | 1.585 | 0.0002837 |
| 2  | rs12614752 | 40169977  | SLC8A1  | 22812 base upstream    | p22.1  | GT | 0.4378 | 1.573 | 0.0002938 |
| 17 | rs714422   | 12103857  | MAP2K4  | 116082 base downstream | p12    | AG | 0.0827 | 0.296 | 0.0002978 |
| 2  | rs10496069 | 57630160  | VRK2    | 497063 base upstream   | p16.1  | AT | 0.9796 | 0.315 | 0.000305  |
| 2  | rs9309301  | 57629406  | VRK2    | 497817 base upstream   | p16.1  | AG | 0.0204 | 3.176 | 0.0003075 |
| 2  | rs10166539 | 57629283  | VRK2    | 497940 base upstream   | p16.1  | AG | 0.0204 | 3.175 | 0.0003083 |
| 17 | rs12150546 | 12108360  | MAP2K4  | 120585 base downstream | p12    | AG | 0.9171 | 3.381 | 0.000309  |
| 2  | rs9309299  | 57629006  | VRK2    | 498217 base upstream   | p16.1  | CG | 0.0204 | 3.171 | 0.000313  |
| 17 | rs16945798 | 12110529  | MAP2K4  | 122754 base downstream | p12    | AG | 0.9169 | 3.381 | 0.0003243 |
| 3  | rs9857839  | 172439746 | TNIK    | intron 31              | q26.2  | CT | 0.0078 | 6.213 | 0.0003401 |
| 14 | rs1777075  | 42261991  | LRFN5   | 818493 base downstream | q21.2  | AG | 0.0708 | 2.102 | 0.000342  |
| 2  | rs9309298  | 57626427  | VRK2    | 500796 base upstream   | p16.1  | AG | 0.9794 | 0.319 | 0.0003496 |
| 2  | rs13412537 | 57636788  | VRK2    | 490435 base upstream   | p16.1  | CG | 0.9797 | 0.316 | 0.0003499 |
| 2  | rs9309297  | 57625311  | VRK2    | 501912 base upstream   | p16.1  | CG | 0.0206 | 3.132 | 0.0003556 |
| 8  | rs6981782  | 17542512  | PDGFRL  | intron 5               | p22    | CT | 0.0137 | 3.771 | 0.0003564 |
| 2  | rs13410921 | 57624516  | VRK2    | 502707 base upstream   | p16.1  | AC | 0.9794 | 0.319 | 0.0003577 |
| 6  | rs9474254  | 52586483  | TRAM2   | 36662 base downstream  | p12.2  | AG | 0.9651 | 0.402 | 0.0003652 |
| 2  | rs13389335 | 57618472  | VRK2    | 508751 base upstream   | p16.1  | AT | 0.9797 | 0.315 | 0.0003667 |
| 18 | rs8095590  | 10664815  | FAM38B  | intron 2               | p11.22 | CT | 0.4977 | 1.561 | 0.0003671 |
| 14 | rs11160216 | 94394040  | GSC     | 87788 base downstream  | q32.13 | AG | 0.0638 | 2.026 | 0.0003714 |
| 2  | rs6746753  | 57617362  | VRK2    | 509861 base upstream   | p16.1  | CG | 0.0199 | 3.241 | 0.0003729 |
| 14 | rs10149887 | 42262582  | LRFN5   | 819084 base downstream | q21.2  | AT | 0.0701 | 2.123 | 0.0003736 |
| 2  | rs13392012 | 57616717  | VRK2    | 510506 base upstream   | p16.1  | CT | 0.0199 | 3.245 | 0.0003737 |
| 6  | rs9400871  | 116133539 | FRK     | 235847 base upstream   | q22.1  | AT | 0.8162 | 0.619 | 0.0003788 |
| 6  | rs9372449  | 116136091 | FRK     | 233295 base upstream   | q22.1  | CG | 0.813  | 0.615 | 0.0003843 |
| 6  | rs9374567  | 116136871 | FRK     | 232515 base upstream   | q22.1  | CT | 0.8162 | 0.619 | 0.0003873 |
| 2  | rs10153799 | 57633546  | VRK2    | 493677 base upstream   | p16.1  | GT | 0.021  | 3.11  | 0.000391  |
| 6  | rs9320546  | 116137208 | FRK     | 232178 base upstream   | q22.1  | CT | 0.8163 | 0.619 | 0.0003952 |
| 3  | rs17066182 | 62091268  | PTPRG   | intron 5               | p14.2  | CT | 0.9896 | 0.206 | 0.0003978 |
| 2  | rs917977   | 40174693  | SLC8A1  | 18096 base upstream    | p22.1  | CT | 0.4434 | 1.559 | 0.0004039 |

|    |            |           |          |                        |        |    |        |       |           |
|----|------------|-----------|----------|------------------------|--------|----|--------|-------|-----------|
| 2  | rs12151560 | 40172384  | SLC8A1   | 20405 base upstream    | p22.1  | CT | 0.4435 | 1.558 | 0.0004062 |
| 13 | rs6492439  | 89120930  | GPC5     | 1727957 base upstream  | q31.3  | CT | 0.9253 | 0.498 | 0.0004101 |
| 6  | rs9463810  | 52615564  | TMEM14A  | 28278 base upstream    | p12.1  | GT | 0.9621 | 0.411 | 0.0004171 |
| 5  | rs11953897 | 26174463  | CDH9     | 742002 base upstream   | p14.1  | AG | 0.0854 | 1.941 | 0.0004296 |
| 9  | rs748787   | 2684201   | KCNV2    | 23324 base upstream    | p24.2  | AG | 0.0721 | 2.075 | 0.0004516 |
| 20 | rs6056488  | 924269    | RSPO4    | intron 4               | p13    | AG | 0.954  | 0.445 | 0.0004531 |
| 9  | rs4741038  | 10573907  | PTPRD    | intron 44              | p23    | AT | 0.1044 | 1.85  | 0.0004966 |
| 6  | rs6904410  | 83342419  | TPBG     | 209086 base downstream | q14.1  | CT | 0.0322 | 2.5   | 0.000497  |
| 6  | rs9361943  | 83341774  | TPBG     | 208441 base downstream | q14.1  | AG | 0.9678 | 0.4   | 0.0004973 |
| 6  | rs16885899 | 83339411  | TPBG     | 206078 base downstream | q14.1  | AG | 0.0322 | 2.51  | 0.0005037 |
| 6  | rs9443987  | 83346508  | TPBG     | 213175 base downstream | q14.1  | CT | 0.0322 | 2.496 | 0.0005088 |
| 6  | rs1999411  | 83348901  | TPBG     | 215568 base downstream | q14.1  | CT | 0.9678 | 0.401 | 0.0005242 |
| 6  | rs1999412  | 83348993  | TPBG     | 215660 base downstream | q14.1  | AC | 0.9678 | 0.401 | 0.0005275 |
| 6  | rs6939695  | 83349658  | TPBG     | 216325 base downstream | q14.1  | AC | 0.9678 | 0.402 | 0.0005513 |
| 11 | rs12292038 | 23636292  | SVIP     | 828334 base downstream | p14.3  | AG | 0.0117 | 4.509 | 0.0005712 |
| 11 | rs11037068 | 5350363   | OR51M1   | 16841 base upstream    | p15.4  | GT | 0.0603 | 2.004 | 0.0005809 |
| 2  | rs6544307  | 40152968  | SLC8A1   | 39821 base upstream    | p22.1  | CT | 0.7233 | 0.627 | 0.0005834 |
| 2  | rs9288698  | 150391583 | C2orf25  | 239066 base downstream | q23.3  | GT | 0.6381 | 0.636 | 0.0005838 |
| 5  | rs4701526  | 26178629  | CDH9     | 737836 base upstream   | p14.1  | CG | 0.085  | 1.889 | 0.0005867 |
| 18 | rs600419   | 10667979  | FAM38B   | intron 4               | p11.22 | CT | 0.5009 | 0.651 | 0.0005947 |
| 18 | rs510529   | 10666564  | FAM38B   | intron 3               | p11.22 | CT | 0.4989 | 1.534 | 0.000597  |
| 5  | rs11959230 | 85551089  | COX7C    | 398450 base upstream   | q14.3  | CT | 0.9884 | 0.231 | 0.0006025 |
| 11 | rs12279140 | 23653839  | LUZP2    | 821292 base upstream   | p14.3  | AC | 0.0133 | 3.769 | 0.0006091 |
| 11 | rs12269913 | 23656340  | LUZP2    | 818791 base upstream   | p14.3  | AC | 0.9866 | 0.266 | 0.0006094 |
| 11 | rs11027431 | 23662377  | LUZP2    | 812754 base upstream   | p14.3  | AT | 0.0135 | 3.721 | 0.000614  |
| 11 | rs11027434 | 23665756  | LUZP2    | 809375 base upstream   | p14.3  | CT | 0.0136 | 3.685 | 0.000623  |
| 11 | rs12293501 | 23666708  | LUZP2    | 808423 base upstream   | p14.3  | AG | 0.0137 | 3.683 | 0.0006239 |
| 11 | rs12294691 | 23649890  | LUZP2    | 825241 base upstream   | p14.3  | AG | 0.987  | 0.263 | 0.000627  |
| 11 | rs11027436 | 23667238  | LUZP2    | 807893 base upstream   | p14.3  | CT | 0.9863 | 0.272 | 0.0006278 |
| 11 | rs11027438 | 23669184  | LUZP2    | 805947 base upstream   | p14.3  | AT | 0.0137 | 3.659 | 0.0006336 |
| 12 | rs5028648  | 118973019 | CCDC64   | intron 2               | q24.23 | AG | 0.7962 | 0.623 | 0.0006341 |
| 11 | rs11027440 | 23669845  | LUZP2    | 805286 base upstream   | p14.3  | AT | 0.9863 | 0.274 | 0.0006353 |
| 11 | rs12274900 | 23671438  | LUZP2    | 803693 base upstream   | p14.3  | CT | 0.9862 | 0.274 | 0.0006386 |
| 11 | rs12283754 | 23672278  | LUZP2    | 802853 base upstream   | p14.3  | AT | 0.0138 | 3.635 | 0.0006562 |
| 12 | rs3852585  | 118998008 | CCDC64   | intron 6               | q24.23 | CT | 0.7976 | 0.629 | 0.0006721 |
| 18 | rs7236228  | 8866666   | KIAA0802 | 43891 base downstream  | p11.22 | CT | 0.5721 | 1.542 | 0.0006864 |
| 11 | rs10789607 | 106690064 | CWF19L2  | 12228 base upstream    | q22.3  | CT | 0.9811 | 0.31  | 0.0006882 |

|    |            |           |           |                        |        |    |        |       |           |
|----|------------|-----------|-----------|------------------------|--------|----|--------|-------|-----------|
| 11 | rs12280993 | 23675755  | LUZP2     | 799376 base upstream   | p14.3  | CT | 0.0139 | 3.617 | 0.0006938 |
| 12 | rs3852587  | 119024673 | RAB35     | intron 3               | q24.23 | AC | 0.2001 | 1.572 | 0.0007225 |
| 12 | rs3936255  | 119031310 | RAB35     | intron 5               | q24.23 | GT | 0.8003 | 0.637 | 0.0007339 |
| 5  | rs346423   | 62568648  | LOC389293 | 459722 base downstream | q12.1  | AG | 0.8717 | 2.223 | 0.0007521 |
| 20 | rs16985881 | 39586586  | CHD6      | intron 34              | q12    | AG | 0.9827 | 0.331 | 0.0007527 |
| 20 | rs6102451  | 39591123  | CHD6      | intron 34              | q12    | AG | 0.0173 | 3.017 | 0.0007527 |
| 20 | rs16985879 | 39585961  | CHD6      | intron 34              | q12    | CT | 0.0173 | 3.017 | 0.0007529 |
| 20 | rs6124365  | 39687101  | CHD6      | 6554 base downstream   | q12    | AC | 0.9829 | 0.327 | 0.000755  |
| 11 | rs7114872  | 23645887  | LUZP2     | 829244 base upstream   | p14.3  | CT | 0.0133 | 3.675 | 0.0007567 |
| 20 | rs6129876  | 39646291  | CHD6      | intron 36              | q12    | AG | 0.0173 | 3.023 | 0.0007587 |
| 20 | rs6093497  | 39634949  | CHD6      | intron 36              | q12    | AG | 0.9827 | 0.331 | 0.0007596 |
| 15 | rs17539990 | 91523799  | RGMA      | 90362 base downstream  | q26.1  | CG | 0.7569 | 0.645 | 0.0007808 |
| 7  | rs10085746 | 82779344  | SEMA3E    | 51813 base upstream    | q21.11 | CT | 0.9822 | 0.332 | 0.0007929 |
| 20 | rs224159   | 24128615  | GGTLA4    | 211199 base downstream | p11.21 | CT | 0.9774 | 0.349 | 0.0008067 |
| 11 | rs1879035  | 23644526  | LUZP2     | 830605 base upstream   | p14.3  | CT | 0.9869 | 0.274 | 0.000828  |
| 6  | rs3734662  | 90707807  | BACH2     | intron 2               | q15    | CT | 0.4704 | 0.664 | 0.0008315 |
| 20 | rs2208014  | 24094378  | GGTLA4    | 176962 base downstream | p11.21 | CT | 0.9785 | 0.355 | 0.0008381 |
| 11 | rs11027422 | 23641651  | LUZP2     | 833480 base upstream   | p14.3  | CG | 0.0131 | 3.637 | 0.0008562 |
| 11 | rs12295501 | 23637818  | SVIP      | 829860 base downstream | p14.3  | CG | 0.0131 | 3.643 | 0.0008568 |
| 11 | rs7122399  | 23639466  | SVIP      | 831508 base downstream | p14.3  | CG | 0.9869 | 0.275 | 0.0008583 |
| 11 | rs1879036  | 23644504  | LUZP2     | 830627 base upstream   | p14.3  | AG | 0.013  | 3.635 | 0.0008589 |
| 7  | rs1557787  | 82671810  | PCLO      | 41677 base downstream  | q21.11 | CT | 0.982  | 0.331 | 0.0008611 |
| 12 | rs7961195  | 78710196  | PPP1R12A  | intron 6               | q21.31 | CT | 0.0183 | 3.062 | 0.0008671 |
| 11 | rs12277987 | 23678195  | LUZP2     | 796936 base upstream   | p14.3  | CT | 0.9871 | 0.257 | 0.0008818 |
| 12 | rs12833727 | 78691492  | PPP1R12A  | 824 base upstream      | q21.2  | CG | 0.9816 | 0.328 | 0.0008977 |
| 12 | rs17005986 | 78733055  | PPP1R12A  | intron 16              | q21.31 | CT | 0.018  | 3.031 | 0.000904  |
| 1  | rs11207145 | 58233385  | DAB1      | intron 16              | p32.2  | AG | 0.0086 | 4.61  | 0.0009134 |
| 20 | rs2179441  | 8465895   | PLCB1     | intron 3               | p12.3  | AC | 0.4075 | 0.644 | 0.0009177 |
| 4  | rs12512046 | 182929319 | ODZ3      | 552811 base upstream   | q35.1  | GT | 0.4678 | 1.509 | 0.0009219 |
| 4  | rs12508055 | 182929362 | ODZ3      | 552768 base upstream   | q35.1  | AG | 0.4678 | 1.508 | 0.0009246 |
| 3  | rs16855954 | 172404356 | TNIK      | intron 29              | q26.2  | AC | 0.9939 | 0.155 | 0.000925  |
| 10 | rs11185747 | 91289457  | SLC16A12  | 4164 base downstream   | q23.31 | AT | 0.0506 | 2.084 | 0.0009606 |
