# Supplementary material for: Genome-Wide Association Study of Suicide Attempts in Mood Disorder Patients
Source: Atypon-hosted journal article supplement (doi:10.1176/appi.ajp.2010.10040541), 2010-11-02
Supplement: ajp_167_12_1499_08.pdf [file ajp_167_12_1499_08.pdf]

| CHR | BP       | SNP        | A1 | A2 | N | P        | P(R)     | OR     | OR(R)  | Q      | I <sup>2</sup> |
|-----|----------|------------|----|----|---|----------|----------|--------|--------|--------|----------------|
| 10  | 97112231 | rs4918918  | C  | T  | 4 | 3.28E-06 | 3.28E-06 | 0.8456 | 0.8456 | 0.8086 | 0              |
| 10  | 97113875 | rs955760   | A  | G  | 4 | 4.87E-06 | 4.87E-06 | 0.8513 | 0.8513 | 0.5216 | 0              |
| 10  | 97109039 | rs7900095  | C  | T  | 4 | 5.58E-06 | 5.58E-06 | 0.8501 | 0.8501 | 0.8056 | 0              |
| 21  | 39943622 | rs10854398 | C  | T  | 4 | 6.06E-06 | 6.06E-06 | 1.178  | 1.178  | 0.6215 | 0              |
| 10  | 97109583 | rs7079293  | C  | T  | 4 | 6.19E-06 | 6.19E-06 | 0.8507 | 0.8507 | 0.7916 | 0              |
| 21  | 39947754 | rs8132770  | A  | T  | 4 | 7.15E-06 | 7.15E-06 | 0.8559 | 0.8559 | 0.6162 | 0              |
| 10  | 30530710 | rs2462021  | C  | T  | 4 | 8.30E-06 | 8.30E-06 | 1.1755 | 1.1755 | 0.4293 | 0              |
| 10  | 97106209 | rs7076888  | C  | T  | 4 | 8.62E-06 | 8.62E-06 | 1.1696 | 1.1696 | 0.3939 | 0              |
| 10  | 30527766 | rs1360550  | A  | G  | 4 | 8.95E-06 | 8.95E-06 | 0.8511 | 0.8511 | 0.43   | 0              |
| 2   | 46174598 | rs12373805 | A  | G  | 4 | 9.20E-06 | 9.20E-06 | 1.2169 | 1.2169 | 0.912  | 0              |
| 10  | 30531413 | rs2488010  | A  | G  | 4 | 1.00E-05 | 1.00E-05 | 1.1738 | 1.1738 | 0.4698 | 0              |
| 10  | 30536131 | rs503598   | A  | G  | 4 | 1.04E-05 | 1.04E-05 | 0.8531 | 0.8531 | 0.5019 | 0              |
| 14  | 33759807 | rs6571636  | A  | G  | 4 | 1.41E-05 | 1.41E-05 | 1.1704 | 1.1704 | 0.74   | 0              |
| 10  | 30507811 | rs2488003  | A  | G  | 4 | 1.56E-05 | 1.56E-05 | 0.8559 | 0.8559 | 0.4251 | 0              |
| 2   | 46174837 | rs10202504 | C  | G  | 4 | 1.60E-05 | 1.60E-05 | 0.8261 | 0.8261 | 0.903  | 0              |
| 2   | 46174384 | rs2345955  | C  | T  | 4 | 1.69E-05 | 1.69E-05 | 0.8275 | 0.8275 | 0.8881 | 0              |
| 20  | 5197302  | rs2038410  | C  | T  | 4 | 1.12E-06 | 1.89E-05 | 1.1933 | 1.1936 | 0.3164 | 15.1           |
| 8   | 1779092  | rs11136435 | A  | G  | 4 | 2.11E-05 | 2.11E-05 | 1.1614 | 1.1614 | 0.508  | 0              |
| 1   | 4548433  | rs504274   | C  | T  | 4 | 2.18E-05 | 2.18E-05 | 0.738  | 0.738  | 0.9341 | 0              |
| 10  | 30540273 | rs2795863  | A  | G  | 4 | 2.54E-05 | 2.54E-05 | 0.8591 | 0.8591 | 0.4916 | 0              |
| 6   | 92134035 | rs2180130  | A  | G  | 4 | 3.00E-05 | 3.00E-05 | 0.8635 | 0.8635 | 0.596  | 0              |
| 10  | 30497139 | rs2488035  | A  | C  | 4 | 3.26E-05 | 3.26E-05 | 1.1646 | 1.1646 | 0.4269 | 0              |
| 10  | 30500212 | rs2482828  | A  | G  | 4 | 3.29E-05 | 3.29E-05 | 1.1632 | 1.1632 | 0.4159 | 0              |
| 10  | 30512209 | rs2795858  | A  | G  | 4 | 3.41E-05 | 3.41E-05 | 0.8614 | 0.8614 | 0.4415 | 0              |
| 10  | 30512398 | rs1977583  | A  | G  | 4 | 3.42E-05 | 3.42E-05 | 1.1609 | 1.1609 | 0.4408 | 0              |
| 10  | 30510906 | rs2505110  | A  | G  | 4 | 3.46E-05 | 3.46E-05 | 1.1609 | 1.1609 | 0.4817 | 0              |
| 2   | 46174610 | rs10167555 | G  | T  | 4 | 3.47E-05 | 3.47E-05 | 1.2066 | 1.2066 | 0.8436 | 0              |
| 10  | 30517781 | rs2482824  | C  | T  | 4 | 3.51E-05 | 3.51E-05 | 0.8616 | 0.8616 | 0.4199 | 0              |
| 10  | 30512779 | rs2798907  | A  | G  | 4 | 3.54E-05 | 3.54E-05 | 0.8616 | 0.8616 | 0.4209 | 0              |
| 10  | 30508511 | rs2505109  | C  | T  | 4 | 3.56E-05 | 3.56E-05 | 0.8616 | 0.8616 | 0.4739 | 0              |
| 10  | 30494239 | rs2488034  | A  | G  | 4 | 3.74E-05 | 3.74E-05 | 1.1633 | 1.1633 | 0.4305 | 0              |
| 2   | 46176270 | rs4953309  | C  | G  | 4 | 3.81E-05 | 3.81E-05 | 0.8365 | 0.8365 | 0.8024 | 0              |
| 10  | 30509940 | rs1571957  | C  | T  | 4 | 4.14E-05 | 4.14E-05 | 1.1592 | 1.1592 | 0.4786 | 0              |
| 10  | 30514592 | rs2798906  | A  | G  | 4 | 4.27E-05 | 4.27E-05 | 1.1588 | 1.1588 | 0.4561 | 0              |
| 10  | 30514493 | rs2795859  | C  | T  | 4 | 4.28E-05 | 4.28E-05 | 0.863  | 0.863  | 0.4641 | 0              |
| 6   | 92125869 | rs6910080  | A  | G  | 4 | 4.32E-05 | 4.32E-05 | 0.8661 | 0.8661 | 0.5847 | 0              |

|    |          |            |   |   |   |           |           |        |        |        |      |
|----|----------|------------|---|---|---|-----------|-----------|--------|--------|--------|------|
| 10 | 30512070 | rs2795857  | C | G | 4 | 4.85E-05  | 4.85E-05  | 1.1579 | 1.1579 | 0.468  | 0    |
| 10 | 30515649 | rs2798920  | A | G | 4 | 4.86E-05  | 4.86E-05  | 1.1575 | 1.1575 | 0.452  | 0    |
| 10 | 30543585 | rs2779068  | G | T | 4 | 4.93E-05  | 4.93E-05  | 1.1603 | 1.1603 | 0.5857 | 0    |
| 10 | 30543961 | rs2689216  | A | G | 4 | 5.21E-05  | 5.21E-05  | 0.8623 | 0.8623 | 0.5881 | 0    |
| 10 | 30517210 | rs2505112  | C | T | 4 | 5.43E-05  | 5.43E-05  | 1.1566 | 1.1566 | 0.4019 | 0    |
| 10 | 97076365 | rs4542335  | C | G | 4 | 5.59E-05  | 5.59E-05  | 1.1653 | 1.1653 | 0.5374 | 0    |
| 6  | 92124822 | rs7762541  | C | T | 4 | 6.13E-05  | 6.13E-05  | 1.1513 | 1.1513 | 0.5642 | 0    |
| 6  | 92118422 | rs9353824  | A | G | 4 | 6.21E-05  | 6.21E-05  | 0.8687 | 0.8687 | 0.5936 | 0    |
| 8  | 1780249  | rs10099567 | A | G | 4 | 6.81E-05  | 6.91E-05  | 0.8682 | 0.8682 | 0.3912 | 0.09 |
| 5  | 2547273  | rs895658   | C | T | 4 | 7.52E-05  | 7.52E-05  | 1.1568 | 1.1568 | 0.4932 | 0    |
| 15 | 86366855 | rs1381112  | A | G | 4 | 6.90E-05  | 7.81E-05  | 0.8122 | 0.8124 | 0.388  | 0.77 |
| 5  | 64018562 | rs275828   | A | G | 4 | 8.40E-05  | 8.40E-05  | 0.8682 | 0.8682 | 0.4424 | 0    |
| 8  | 1778840  | rs11136431 | C | T | 4 | 4.90E-05  | 8.57E-05  | 1.1563 | 1.1558 | 0.3748 | 3.56 |
| 5  | 2550120  | rs1562414  | A | G | 4 | 9.32E-05  | 9.32E-05  | 0.8661 | 0.8661 | 0.473  | 0    |
| 2  | 46197239 | rs12619351 | G | T | 4 | 9.83E-05  | 9.83E-05  | 0.8478 | 0.8478 | 0.4807 | 0    |
| 5  | 64017230 | rs275829   | A | T | 4 | 0.0001103 | 0.0001103 | 0.8687 | 0.8687 | 0.4725 | 0    |
| 5  | 64047836 | rs183917   | C | T | 4 | 0.0001144 | 0.0001184 | 0.8741 | 0.8742 | 0.3907 | 0.2  |
| 5  | 2511057  | rs315892   | C | T | 4 | 0.0001187 | 0.0001187 | 0.8609 | 0.8609 | 0.5747 | 0    |
| 5  | 64055597 | rs10075967 | C | T | 4 | 0.000119  | 0.000119  | 1.1436 | 1.1436 | 0.3927 | 0    |
| 10 | 97100869 | rs6583995  | C | T | 4 | 0.0001217 | 0.0001217 | 1.1586 | 1.1586 | 0.4032 | 0    |
| 2  | 46181464 | rs12477409 | C | G | 4 | 0.0001237 | 0.0001237 | 1.1759 | 1.1759 | 0.6654 | 0    |
| 5  | 64029942 | rs275832   | A | G | 4 | 0.0001073 | 0.0001297 | 1.1448 | 1.1443 | 0.3866 | 1.08 |
| 2  | 46183371 | rs1116246  | A | G | 4 | 0.0001311 | 0.0001311 | 1.1752 | 1.1752 | 0.6593 | 0    |
| 2  | 45964078 | rs13431763 | A | G | 4 | 0.0001343 | 0.0001343 | 0.8511 | 0.8511 | 0.6322 | 0    |
| 2  | 46181374 | rs12477342 | C | T | 4 | 0.0001348 | 0.0001348 | 0.8512 | 0.8512 | 0.6679 | 0    |
| 2  | 46185673 | rs12712969 | C | T | 4 | 0.0001422 | 0.0001422 | 0.8516 | 0.8516 | 0.6506 | 0    |
| 6  | 48336297 | rs2503674  | C | T | 4 | 0.0001474 | 0.0001474 | 0.8014 | 0.8014 | 0.5655 | 0    |
| 2  | 46187198 | rs12712970 | A | G | 4 | 0.0001616 | 0.0001616 | 1.1715 | 1.1715 | 0.6838 | 0    |
| 2  | 45962449 | rs11125041 | C | T | 4 | 0.0001633 | 0.0001633 | 1.1714 | 1.1714 | 0.5871 | 0    |
| 2  | 46196507 | rs3768752  | A | C | 4 | 0.0001668 | 0.0001668 | 1.171  | 1.171  | 0.6605 | 0    |
| 20 | 5203899  | rs996389   | G | T | 4 | 0.0001521 | 0.000174  | 1.1441 | 1.1441 | 0.3872 | 0.96 |
| 2  | 46193882 | rs1375055  | A | G | 4 | 0.0001812 | 0.0001812 | 1.17   | 1.17   | 0.671  | 0    |
| 2  | 46192218 | rs1597156  | C | T | 4 | 0.0001837 | 0.0001837 | 0.8549 | 0.8549 | 0.6725 | 0    |
| 5  | 2532789  | rs10475154 | G | T | 4 | 0.0001859 | 0.0001859 | 0.8674 | 0.8674 | 0.535  | 0    |
| 9  | 19646396 | rs16937690 | A | G | 4 | 0.0001906 | 0.0001906 | 1.1471 | 1.1471 | 0.5006 | 0    |
| 5  | 64066108 | rs2610243  | G | T | 4 | 0.0001917 | 0.0001917 | 0.8769 | 0.8769 | 0.4191 | 0    |
| 5  | 64077497 | rs188027   | C | T | 4 | 0.000194  | 0.000194  | 1.1387 | 1.1387 | 0.4247 | 0    |

|    |           |            |   |   |   |           |           |        |        |        |       |
|----|-----------|------------|---|---|---|-----------|-----------|--------|--------|--------|-------|
| 17 | 11467738  | rs16945089 | C | G | 3 | 0.0001941 | 0.0001941 | 1.273  | 1.273  | 0.8332 | 0     |
| 5  | 64088118  | rs275823   | C | T | 4 | 0.0001949 | 0.0001949 | 1.1401 | 1.1401 | 0.4159 | 0     |
| 2  | 46182056  | rs7568264  | A | G | 4 | 0.0001951 | 0.0001951 | 0.8519 | 0.8519 | 0.5786 | 0     |
| 5  | 64063348  | rs4700651  | A | T | 4 | 0.0001956 | 0.0001956 | 0.8782 | 0.8782 | 0.4106 | 0     |
| 5  | 64076579  | rs275820   | G | T | 4 | 0.0002059 | 0.0002059 | 0.8787 | 0.8787 | 0.4185 | 0     |
| 20 | 5210119   | rs6107609  | C | T | 4 | 0.0002601 | 0.0002601 | 0.8771 | 0.8771 | 0.4523 | 0     |
| 3  | 141211649 | rs16849682 | C | T | 3 | 0.0002724 | 0.0002724 | 0.6972 | 0.6972 | 0.4624 | 0     |
| 20 | 5203159   | rs6038111  | A | C | 4 | 0.0001452 | 0.0002729 | 0.8737 | 0.8735 | 0.3694 | 4.69  |
| 6  | 127762249 | rs6938872  | G | T | 4 | 0.0002506 | 0.0002768 | 0.7316 | 0.732  | 0.3888 | 0.6   |
| 5  | 64084924  | rs7715910  | C | T | 4 | 0.0002928 | 0.0002928 | 0.8804 | 0.8804 | 0.4124 | 0     |
| 5  | 64072297  | rs6449751  | C | G | 4 | 0.0002949 | 0.0002949 | 1.1344 | 1.1344 | 0.4074 | 0     |
| 2  | 45955645  | rs12467641 | A | T | 4 | 0.0003114 | 0.0003114 | 1.1661 | 1.1661 | 0.4727 | 0     |
| 20 | 5211444   | rs2326618  | A | G | 4 | 0.0003227 | 0.0003227 | 1.1378 | 1.1378 | 0.4241 | 0     |
| 5  | 64028945  | rs182149   | C | T | 4 | 0.0001225 | 0.0003783 | 1.1435 | 1.1407 | 0.3588 | 6.87  |
| 2  | 123052210 | rs1439838  | A | T | 4 | 7.70E-05  | 0.0003953 | 0.8644 | 0.8667 | 0.3396 | 10.67 |
| 5  | 2516858   | rs6877519  | A | G | 4 | 7.24E-05  | 0.0004129 | 1.1609 | 1.1598 | 0.3288 | 12.76 |
| 20 | 5201641   | rs6038108  | C | T | 4 | 0.0001351 | 0.0004218 | 0.8732 | 0.8727 | 0.3488 | 8.85  |
| 5  | 5754291   | rs11134123 | C | G | 3 | 0.0004313 | 0.0004313 | 0.583  | 0.583  | 0.7763 | 0     |
| 8  | 127250276 | rs2385523  | A | C | 4 | 0.0004694 | 0.0004694 | 0.863  | 0.863  | 0.5383 | 0     |
| 20 | 5202928   | rs6038110  | A | G | 4 | 0.00016   | 0.0004973 | 0.8745 | 0.874  | 0.3482 | 8.98  |
| 1  | 167156181 | rs17514245 | A | G | 4 | 0.0005025 | 0.0005025 | 1.2194 | 1.2194 | 0.4024 | 0     |
| 6  | 127666637 | rs9401948  | C | T | 4 | 0.0003183 | 0.000525  | 0.7356 | 0.7377 | 0.3767 | 3.18  |
| 20 | 5202768   | rs6038109  | C | T | 4 | 0.000159  | 0.000525  | 0.8745 | 0.8739 | 0.3455 | 9.51  |
| 6  | 127692809 | rs9401949  | C | T | 4 | 0.0003082 | 0.0005271 | 1.3605 | 1.3562 | 0.3756 | 3.4   |
| 6  | 127691077 | rs9372865  | C | T | 4 | 0.0003224 | 0.0005335 | 0.7358 | 0.738  | 0.3766 | 3.2   |
| 6  | 127720097 | rs2073298  | C | T | 4 | 0.0003256 | 0.0005345 | 0.7353 | 0.7375 | 0.3768 | 3.15  |
| 6  | 127717884 | rs6569485  | C | T | 4 | 0.0003266 | 0.0005422 | 0.736  | 0.7382 | 0.3764 | 3.23  |
| 6  | 127643410 | rs9388559  | A | G | 4 | 0.0003675 | 0.0005565 | 1.3552 | 1.3518 | 0.3791 | 2.67  |
| 6  | 127697120 | rs9372866  | C | T | 4 | 0.000316  | 0.0005716 | 1.3597 | 1.3549 | 0.3738 | 3.78  |
| 20 | 5204774   | rs6515995  | G | T | 4 | 0.0001561 | 0.0005776 | 0.8743 | 0.8737 | 0.3408 | 10.45 |
| 2  | 55891570  | rs6723695  | C | T | 4 | 0.0001111 | 0.0005852 | 1.3261 | 1.3186 | 0.335  | 11.56 |
| 5  | 159180592 | rs17057166 | C | T | 3 | 0.0005856 | 0.0005856 | 1.3649 | 1.3649 | 0.6077 | 0     |
| 6  | 127698485 | rs9375502  | G | T | 4 | 0.0003164 | 0.0005868 | 0.7355 | 0.7382 | 0.373  | 3.95  |
| 20 | 5204385   | rs6053245  | C | T | 4 | 0.0001468 | 0.0005904 | 0.8738 | 0.8731 | 0.3373 | 11.13 |
| 9  | 20232344  | rs10811336 | A | C | 4 | 0.0005982 | 0.0005982 | 1.1907 | 1.1907 | 0.5134 | 0     |
| 2  | 55889730  | rs10196888 | A | G | 4 | 0.000106  | 0.0006126 | 0.7514 | 0.756  | 0.3323 | 12.08 |
| 6  | 127637134 | rs9375498  | A | G | 4 | 0.0004025 | 0.0006208 | 1.3524 | 1.3489 | 0.3784 | 2.82  |

|    |           |            |   |   |   |           |           |        |        |        |       |
|----|-----------|------------|---|---|---|-----------|-----------|--------|--------|--------|-------|
| 6  | 127643754 | rs9401947  | C | T | 4 | 0.0003993 | 0.0006522 | 0.7405 | 0.7427 | 0.3765 | 3.22  |
| 6  | 127655994 | rs6936084  | A | G | 4 | 0.000364  | 0.0006543 | 1.3554 | 1.3507 | 0.3737 | 3.81  |
| 6  | 127647360 | rs7764180  | A | C | 4 | 0.000376  | 0.0006547 | 0.7383 | 0.7408 | 0.3746 | 3.61  |
| 6  | 127659891 | rs9372863  | A | G | 4 | 0.000376  | 0.0006547 | 0.7383 | 0.7408 | 0.3746 | 3.61  |
| 6  | 127662563 | rs761842   | A | T | 4 | 0.000376  | 0.0006547 | 0.7383 | 0.7408 | 0.3746 | 3.61  |
| 6  | 127642939 | rs9372862  | C | T | 4 | 0.0003687 | 0.0006659 | 1.3551 | 1.3502 | 0.3735 | 3.85  |
| 6  | 127690339 | rs4141423  | C | T | 4 | 0.0003808 | 0.0006666 | 0.7385 | 0.741  | 0.3744 | 3.65  |
| 6  | 127642888 | rs9372861  | C | T | 4 | 0.0003726 | 0.0006688 | 0.7382 | 0.7408 | 0.3737 | 3.81  |
| 6  | 127744028 | rs9385420  | A | G | 4 | 0.0003964 | 0.000684  | 0.738  | 0.7404 | 0.3749 | 3.56  |
| 6  | 127739111 | rs9375505  | C | T | 4 | 0.0003812 | 0.0006869 | 1.3552 | 1.3503 | 0.3735 | 3.84  |
| 6  | 127688899 | rs9375500  | C | T | 4 | 0.0003783 | 0.0006902 | 1.3543 | 1.3494 | 0.3731 | 3.93  |
| 2  | 55903459  | rs13394642 | A | G | 4 | 0.0001485 | 0.0007057 | 0.7551 | 0.7594 | 0.3372 | 11.14 |
| 6  | 127638279 | rs9388558  | A | T | 4 | 0.0003789 | 0.0007076 | 0.7384 | 0.7412 | 0.3723 | 4.09  |
| 6  | 127767426 | rs6941233  | A | G | 4 | 0.0002304 | 0.0007488 | 0.7262 | 0.7315 | 0.355  | 7.61  |
| 20 | 5221382   | rs2234397  | A | G | 3 | 0.0007701 | 0.0007701 | 0.8843 | 0.8843 | 0.3912 | 0     |
| 5  | 143534973 | rs6887917  | A | G | 4 | 0.0003554 | 0.0008447 | 1.1391 | 1.1401 | 0.3495 | 8.72  |
| 6  | 127648042 | rs9321072  | C | T | 4 | 0.0004497 | 0.0008528 | 0.7413 | 0.7442 | 0.3713 | 4.29  |
| 1  | 167157044 | rs7530207  | C | G | 4 | 0.0006682 | 0.0008992 | 0.8229 | 0.8236 | 0.381  | 2.27  |
| 5  | 55358652  | rs17348299 | A | C | 4 | 0.0009495 | 0.0009495 | 1.1739 | 1.1739 | 0.4061 | 0     |
| 2  | 123043417 | rs6759289  | A | C | 4 | 0.0001149 | 0.001018  | 0.8676 | 0.871  | 0.3146 | 15.44 |
| 6  | 127754044 | rs9401954  | A | C | 4 | 0.0005464 | 0.001046  | 0.746  | 0.7491 | 0.3706 | 4.45  |
| 5  | 2517882   | rs13175490 | A | G | 4 | 4.85E-05  | 0.001087  | 1.1701 | 1.1657 | 0.274  | 22.81 |
| 2  | 55892233  | rs7577580  | G | T | 4 | 0.0001796 | 0.001164  | 1.3184 | 1.3091 | 0.3219 | 14.07 |
| 4  | 9846004   | rs877619   | A | G | 3 | 0.001188  | 0.001188  | 0.5091 | 0.5091 | 0.5525 | 0     |
| 10 | 97117254  | rs6583997  | C | T | 4 | 0.000504  | 0.001254  | 0.8741 | 0.874  | 0.3485 | 8.93  |
| 1  | 167156031 | rs17514217 | A | T | 4 | 0.0006895 | 0.00134   | 0.8233 | 0.825  | 0.3671 | 5.18  |
| 2  | 55901698  | rs6759150  | A | T | 4 | 0.000216  | 0.001369  | 0.7603 | 0.7659 | 0.3214 | 14.17 |
| 5  | 2532446   | rs10075636 | C | T | 4 | 0.0004468 | 0.001373  | 1.1501 | 1.1487 | 0.3446 | 9.7   |
| 10 | 115736409 | rs17653713 | C | T | 4 | 2.07E-05  | 0.001377  | 0.7393 | 0.7347 | 0.1912 | 36.81 |
| 5  | 2527518   | rs9312996  | C | G | 4 | 0.0004652 | 0.001398  | 1.1516 | 1.1497 | 0.3468 | 9.26  |
| 2  | 123035921 | rs7573865  | C | G | 4 | 0.0001453 | 0.001423  | 1.1502 | 1.1454 | 0.3072 | 16.83 |
| 4  | 175712054 | rs2877818  | C | T | 4 | 0.001461  | 0.001461  | 1.2219 | 1.2219 | 0.4167 | 0     |
| 5  | 2530430   | rs10055939 | G | T | 4 | 0.000325  | 0.001462  | 1.154  | 1.1528 | 0.3265 | 13.2  |
| 2  | 123036498 | rs9308638  | G | T | 4 | 0.0001463 | 0.001499  | 1.1501 | 1.1452 | 0.305  | 17.22 |
| 2  | 123038464 | rs7581875  | C | T | 4 | 0.0001401 | 0.001514  | 0.8691 | 0.873  | 0.3031 | 17.58 |
| 2  | 123041003 | rs6541834  | G | T | 4 | 0.0001401 | 0.001514  | 0.8691 | 0.873  | 0.3031 | 17.58 |
| 2  | 123058863 | rs10864879 | C | G | 4 | 8.77E-05  | 0.001593  | 1.1566 | 1.1496 | 0.2875 | 20.41 |

|    |           |            |   |   |   |           |          |        |        |        |       |
|----|-----------|------------|---|---|---|-----------|----------|--------|--------|--------|-------|
| 1  | 110900289 | rs903050   | C | T | 4 | 8.56E-05  | 0.001613 | 1.2584 | 1.2566 | 0.2585 | 25.52 |
| 2  | 123038857 | rs1527255  | A | C | 4 | 0.0001468 | 0.001667 | 1.1501 | 1.1449 | 0.3001 | 18.13 |
| 14 | 55248246  | rs12431962 | A | G | 4 | 0.0001539 | 0.001823 | 1.2436 | 1.2414 | 0.2784 | 22.03 |
| 2  | 123050723 | rs2272315  | A | G | 4 | 9.55E-05  | 0.001871 | 0.8653 | 0.8707 | 0.2824 | 21.33 |
| 2  | 123035471 | rs1561552  | G | T | 4 | 0.0001682 | 0.001902 | 1.1487 | 1.1434 | 0.2982 | 18.46 |
| 3  | 22438352  | rs11129059 | A | G | 4 | 0.001936  | 0.001936 | 1.161  | 1.161  | 0.4193 | 0     |
| 14 | 55246612  | rs2880396  | A | C | 4 | 0.0001508 | 0.001973 | 1.2444 | 1.2428 | 0.2709 | 23.35 |
| 2  | 123042613 | rs11122916 | C | T | 4 | 0.0001622 | 0.002015 | 0.8703 | 0.8745 | 0.2942 | 19.2  |
| 4  | 175713571 | rs10019035 | C | T | 4 | 0.001964  | 0.002048 | 1.2164 | 1.2164 | 0.3895 | 0.46  |
| 5  | 2517988   | rs13156277 | C | T | 4 | 5.86E-05  | 0.002066 | 1.1656 | 1.1614 | 0.2442 | 27.97 |
| 13 | 89560729  | rs7325881  | C | T | 4 | 0.0003498 | 0.002171 | 0.8504 | 0.8532 | 0.3143 | 15.51 |
| 14 | 55248459  | rs12432019 | C | G | 4 | 0.000166  | 0.002175 | 1.2423 | 1.24   | 0.2708 | 23.37 |
| 14 | 55246211  | rs8015301  | C | T | 4 | 0.0001528 | 0.00221  | 0.8027 | 0.8033 | 0.2625 | 24.81 |
| 2  | 123069387 | rs2418570  | A | G | 4 | 9.12E-05  | 0.002255 | 0.8648 | 0.8703 | 0.2689 | 23.71 |
| 20 | 5207966   | rs6085062  | C | G | 4 | 0.0001736 | 0.002256 | 1.1432 | 1.1458 | 0.2713 | 23.28 |
| 20 | 5207931   | rs6085061  | C | T | 4 | 0.0001694 | 0.00226  | 0.8746 | 0.8725 | 0.2701 | 23.48 |
| 14 | 55245765  | rs7152314  | C | T | 4 | 0.0001466 | 0.002285 | 0.8022 | 0.8029 | 0.2588 | 25.46 |
| 2  | 123045361 | rs13425998 | C | T | 4 | 0.0001326 | 0.002309 | 1.1505 | 1.1426 | 0.2861 | 20.65 |
| 10 | 115728492 | rs17653278 | C | G | 4 | 1.03E-05  | 0.002348 | 0.7291 | 0.721  | 0.126  | 47.56 |
| 2  | 123024644 | rs1080548  | C | T | 4 | 0.0002039 | 0.002492 | 0.8722 | 0.8765 | 0.2913 | 19.73 |
| 3  | 22537241  | rs4392438  | C | T | 4 | 0.0002175 | 0.002532 | 0.8559 | 0.8616 | 0.2955 | 18.97 |
| 2  | 123048824 | rs999492   | A | C | 4 | 0.0001128 | 0.002575 | 0.8687 | 0.8753 | 0.2756 | 22.52 |
| 2  | 123061530 | rs1304771  | A | G | 4 | 0.0001235 | 0.002838 | 1.153  | 1.1451 | 0.2697 | 23.56 |
| 2  | 123031238 | rs11695611 | C | T | 4 | 0.0002279 | 0.002902 | 0.8743 | 0.8796 | 0.2921 | 19.57 |
| 2  | 123068787 | rs10171928 | C | T | 4 | 0.0001133 | 0.002941 | 0.8657 | 0.8717 | 0.2627 | 24.78 |
| 4  | 82339936  | rs984924   | A | G | 3 | 0.0007466 | 0.002963 | 0.7676 | 0.7681 | 0.305  | 15.78 |
| 20 | 5219710   | rs910970   | C | T | 4 | 4.39E-05  | 0.002983 | 1.154  | 1.1626 | 0.1687 | 40.51 |
| 2  | 123031511 | rs9308637  | C | T | 4 | 0.0002267 | 0.002988 | 0.8731 | 0.8776 | 0.2855 | 20.76 |
| 2  | 123091471 | rs1918273  | G | T | 4 | 6.88E-05  | 0.002992 | 0.8618 | 0.869  | 0.2469 | 27.51 |
| 4  | 175714448 | rs9998916  | C | G | 4 | 0.002024  | 0.003001 | 0.8216 | 0.8214 | 0.3707 | 4.43  |
| 2  | 123098289 | rs1371489  | C | T | 4 | 6.06E-05  | 0.003041 | 0.8608 | 0.8683 | 0.242  | 28.35 |
| 13 | 89566249  | rs9588875  | A | T | 4 | 0.0004212 | 0.003104 | 0.8522 | 0.8551 | 0.3017 | 17.84 |
| 2  | 123022799 | rs10201094 | C | G | 4 | 0.000226  | 0.003226 | 0.873  | 0.8777 | 0.2816 | 21.46 |
| 2  | 123023527 | rs2091427  | C | G | 4 | 0.0002592 | 0.003238 | 0.8741 | 0.8786 | 0.2865 | 20.58 |
| 10 | 115729399 | rs17574901 | C | T | 4 | 1.41E-05  | 0.003294 | 0.7335 | 0.7245 | 0.1136 | 49.66 |
| 14 | 55251053  | rs11621130 | C | T | 4 | 0.0002052 | 0.003592 | 0.8078 | 0.8093 | 0.246  | 27.66 |
| 2  | 123046194 | rs10195812 | C | T | 4 | 0.0001584 | 0.003604 | 0.8706 | 0.8776 | 0.2697 | 23.56 |

|    |           |            |   |   |   |           |          |        |        |        |       |
|----|-----------|------------|---|---|---|-----------|----------|--------|--------|--------|-------|
| 13 | 89566889  | rs9805500  | C | T | 4 | 0.0004579 | 0.003655 | 1.1722 | 1.168  | 0.2955 | 18.96 |
| 2  | 123048317 | rs1527253  | C | T | 4 | 0.0001534 | 0.003742 | 1.149  | 1.1396 | 0.2668 | 24.07 |
| 2  | 123037185 | rs766757   | C | T | 4 | 0.0002268 | 0.00376  | 0.873  | 0.878  | 0.2727 | 23.03 |
| 10 | 30537356  | rs560559   | A | G | 4 | 0.0001623 | 0.003938 | 1.1609 | 1.1492 | 0.2741 | 22.79 |
| 12 | 94632343  | rs4077227  | C | T | 4 | 0.001106  | 0.004118 | 0.874  | 0.8748 | 0.3215 | 14.15 |
| 2  | 123070752 | rs1405604  | A | G | 4 | 0.0001272 | 0.00414  | 0.8697 | 0.8772 | 0.2539 | 26.3  |
| 20 | 5221314   | rs6038126  | C | T | 4 | 3.89E-05  | 0.004287 | 1.1551 | 1.167  | 0.131  | 46.72 |
| 11 | 23675755  | rs12280993 | C | T | 2 | 0.0009513 | 0.004434 | 2.9248 | 2.8415 | 0.2769 | 15.42 |
| 11 | 23672278  | rs12283754 | A | T | 2 | 0.0009139 | 0.004719 | 2.9355 | 2.8458 | 0.2739 | 16.46 |
| 5  | 2532515   | rs16869822 | A | G | 4 | 0.0006631 | 0.00484  | 1.1452 | 1.1427 | 0.2904 | 19.88 |
| 11 | 23669845  | rs11027440 | A | T | 2 | 0.0008847 | 0.004957 | 0.3397 | 0.351  | 0.2715 | 17.29 |
| 11 | 23671438  | rs12274900 | C | T | 2 | 0.0008847 | 0.004957 | 0.3397 | 0.351  | 0.2715 | 17.29 |
| 14 | 55252880  | rs12587803 | A | G | 4 | 0.0002761 | 0.004985 | 1.2329 | 1.2288 | 0.2407 | 28.56 |
| 20 | 5222381   | rs6053263  | C | G | 4 | 5.85E-05  | 0.005004 | 1.1526 | 1.1652 | 0.1289 | 47.07 |
| 13 | 45339540  | rs4941534  | A | T | 4 | 6.44E-06  | 0.005027 | 0.6782 | 0.649  | 0.0771 | 56.16 |
| 2  | 123087692 | rs1595755  | C | T | 4 | 0.0001122 | 0.005058 | 1.1511 | 1.1396 | 0.241  | 28.51 |
| 2  | 123075396 | rs6753885  | A | T | 4 | 0.0001168 | 0.005092 | 1.1507 | 1.1393 | 0.2418 | 28.38 |
| 7  | 115977929 | rs3815412  | C | T | 4 | 0.0007957 | 0.005137 | 1.1416 | 1.1368 | 0.3045 | 17.32 |
| 11 | 23669184  | rs11027438 | A | T | 2 | 0.0008949 | 0.005154 | 2.9473 | 2.8502 | 0.2703 | 17.7  |
| 2  | 123083369 | rs2043940  | C | T | 4 | 0.0001179 | 0.005371 | 1.1506 | 1.139  | 0.2392 | 28.82 |
| 11 | 23667238  | rs11027436 | C | T | 2 | 0.0008611 | 0.005448 | 0.3381 | 0.3503 | 0.2675 | 18.65 |
| 11 | 23666708  | rs12293501 | A | G | 2 | 0.0008767 | 0.005605 | 2.9589 | 2.8547 | 0.2668 | 18.89 |
| 11 | 23665756  | rs11027434 | C | T | 2 | 0.0008729 | 0.005639 | 2.9601 | 2.8551 | 0.2665 | 19    |
| 2  | 123052783 | rs10445851 | G | T | 4 | 0.0001869 | 0.005686 | 1.1458 | 1.1357 | 0.2494 | 27.07 |
| 20 | 5208540   | rs2145083  | A | G | 4 | 0.0001467 | 0.005699 | 1.145  | 1.1522 | 0.1888 | 37.2  |
| 20 | 5203078   | rs6116721  | G | T | 4 | 0.0003928 | 0.005756 | 0.8774 | 0.877  | 0.244  | 28    |
| 20 | 5209399   | rs6116726  | C | T | 4 | 0.0003825 | 0.005848 | 1.1406 | 1.1406 | 0.2463 | 27.61 |
| 3  | 59331465  | rs6446043  | A | T | 4 | 0.0007246 | 0.005929 | 0.8845 | 0.8908 | 0.3057 | 17.09 |
| 7  | 52133795  | rs9690478  | C | G | 4 | 0.000516  | 0.006058 | 0.8607 | 0.8588 | 0.2423 | 28.29 |
| 2  | 106695948 | rs1006472  | A | C | 4 | 0.0004637 | 0.006076 | 1.1452 | 1.1373 | 0.2766 | 22.34 |
| 12 | 94615189  | rs12423171 | A | G | 4 | 0.00101   | 0.006333 | 0.8719 | 0.8729 | 0.2866 | 20.57 |
| 11 | 23662377  | rs11027431 | A | T | 2 | 0.000889  | 0.006417 | 2.9736 | 2.8599 | 0.2619 | 20.56 |
| 22 | 17963106  | rs5746794  | C | G | 4 | 0.002061  | 0.006653 | 0.8954 | 0.8957 | 0.3198 | 14.46 |
| 20 | 5209029   | rs6038114  | A | G | 4 | 0.0001388 | 0.006748 | 0.8729 | 0.8663 | 0.1702 | 40.26 |
| 14 | 82831246  | rs162637   | C | T | 4 | 0.001448  | 0.006871 | 0.8689 | 0.8732 | 0.3136 | 15.64 |
| 5  | 149554727 | rs17652448 | C | T | 3 | 0.002578  | 0.006885 | 0.6545 | 0.6637 | 0.3467 | 5.61  |
| 12 | 94627360  | rs12824729 | A | G | 4 | 0.001214  | 0.007147 | 1.143  | 1.1413 | 0.2893 | 20.08 |

|    |           |            |   |   |   |           |          |        |        |        |       |
|----|-----------|------------|---|---|---|-----------|----------|--------|--------|--------|-------|
| 11 | 23656340  | rs12269913 | A | C | 2 | 0.0008733 | 0.007229 | 0.3344 | 0.3488 | 0.2567 | 22.27 |
| 20 | 5209132   | rs6038115  | A | G | 4 | 0.0001298 | 0.007255 | 0.8724 | 0.8651 | 0.1597 | 41.98 |
| 12 | 94615484  | rs17286390 | A | T | 4 | 0.001075  | 0.007639 | 0.8728 | 0.874  | 0.2757 | 22.5  |
| 12 | 94635249  | rs17287370 | A | G | 4 | 0.00138   | 0.007743 | 0.8763 | 0.8774 | 0.2884 | 20.24 |
| 20 | 5209440   | rs4384857  | C | G | 4 | 0.0001305 | 0.00793  | 0.8724 | 0.8646 | 0.1518 | 43.27 |
| 3  | 22446750  | rs9852024  | A | T | 4 | 0.001907  | 0.00795  | 1.1691 | 1.1632 | 0.3185 | 14.71 |
| 20 | 5209206   | rs4553880  | C | T | 4 | 0.0001414 | 0.007966 | 0.873  | 0.8654 | 0.1547 | 42.81 |
| 17 | 51900513  | rs12945850 | C | T | 4 | 0.0004312 | 0.008013 | 1.1515 | 1.1416 | 0.2596 | 25.33 |
| 2  | 106705890 | rs898457   | A | G | 4 | 0.0005072 | 0.008017 | 1.1441 | 1.1352 | 0.2633 | 24.68 |
| 12 | 94629965  | rs10507059 | C | T | 4 | 0.001332  | 0.00806  | 0.8759 | 0.8771 | 0.2836 | 21.09 |
| 5  | 2522415   | rs6880842  | A | G | 4 | 3.20E-05  | 0.008085 | 1.163  | 1.1548 | 0.1452 | 44.37 |
| 1  | 110896325 | rs1281173  | C | T | 4 | 0.001393  | 0.008151 | 0.817  | 0.8181 | 0.2801 | 21.72 |
| 2  | 106707725 | rs13393451 | A | G | 4 | 0.0004936 | 0.008176 | 0.8738 | 0.8809 | 0.2615 | 25    |
| 11 | 23649890  | rs12294691 | A | G | 2 | 0.0009355 | 0.008329 | 0.3331 | 0.3483 | 0.252  | 23.79 |
| 2  | 106706061 | rs898456   | A | G | 4 | 0.0005105 | 0.008486 | 0.8741 | 0.8812 | 0.2602 | 25.22 |
| 8  | 11156393  | rs10503418 | C | T | 4 | 0.0002777 | 0.008532 | 1.1621 | 1.1762 | 0.175  | 39.48 |
| 5  | 2515225   | rs11133949 | A | G | 4 | 0.0002875 | 0.008729 | 1.139  | 1.1325 | 0.2215 | 31.8  |
| 10 | 111992160 | rs12412423 | C | G | 4 | 0.0009875 | 0.008788 | 1.2501 | 1.2591 | 0.2469 | 27.51 |
| 2  | 123098501 | rs11684281 | G | T | 4 | 0.0001209 | 0.008821 | 0.8693 | 0.88   | 0.2113 | 33.49 |
| 10 | 112303893 | rs7901527  | A | G | 4 | 0.001107  | 0.008844 | 0.8833 | 0.886  | 0.2747 | 22.68 |
| 2  | 106716044 | rs11124131 | A | C | 4 | 0.0004416 | 0.008981 | 1.1445 | 1.1343 | 0.2537 | 26.35 |
| 17 | 51894034  | rs1548809  | C | T | 4 | 0.0004768 | 0.009176 | 1.1503 | 1.1402 | 0.2542 | 26.26 |
| 17 | 51893701  | rs9913702  | C | T | 4 | 0.0004743 | 0.009282 | 0.8693 | 0.877  | 0.2533 | 26.42 |
| 10 | 30516612  | rs576505   | C | T | 4 | 0.000284  | 0.009352 | 1.1502 | 1.136  | 0.2472 | 27.46 |
| 7  | 82779344  | rs10085746 | T | C | 3 | 0.0004455 | 0.009371 | 1.6925 | 1.7804 | 0.1435 | 48.5  |
| 5  | 2526843   | rs3104229  | C | G | 4 | 2.96E-05  | 0.009532 | 1.1637 | 1.1537 | 0.1367 | 45.77 |
| 12 | 94624381  | rs11108202 | A | G | 4 | 0.001293  | 0.009632 | 1.1422 | 1.14   | 0.2701 | 23.49 |
| 4  | 82313069  | rs1546651  | C | T | 3 | 0.0006026 | 0.009658 | 0.7764 | 0.7795 | 0.2291 | 32.14 |
| 5  | 2506377   | rs1908159  | A | G | 4 | 0.0003433 | 0.009802 | 1.136  | 1.1294 | 0.2226 | 31.61 |
| 6  | 29829284  | rs2523407  | C | G | 4 | 0.0003847 | 0.01046  | 0.8447 | 0.8574 | 0.2518 | 26.68 |
| 2  | 106709532 | rs13391600 | C | T | 4 | 0.0005841 | 0.01082  | 0.8754 | 0.883  | 0.2495 | 27.07 |
| 4  | 82333327  | rs3733552  | C | G | 3 | 0.0005421 | 0.01115  | 0.7529 | 0.7563 | 0.2089 | 36.15 |
| 11 | 23678195  | rs12277987 | C | T | 2 | 0.001344  | 0.01127  | 0.3329 | 0.3485 | 0.2454 | 25.88 |
| 10 | 112308514 | rs6584994  | C | G | 4 | 0.001141  | 0.01128  | 0.881  | 0.8834 | 0.2523 | 26.58 |
| 3  | 22448847  | rs11716879 | A | T | 4 | 0.002298  | 0.01131  | 1.158  | 1.1509 | 0.3077 | 16.72 |
| 4  | 182937652 | rs12504073 | A | C | 4 | 0.0004632 | 0.01141  | 0.8803 | 0.8654 | 0.1135 | 49.68 |
| 17 | 51908311  | rs8070836  | C | T | 4 | 0.0008407 | 0.01176  | 0.8748 | 0.8816 | 0.2587 | 25.48 |

|    |           |            |   |   |   |           |         |        |        |        |       |
|----|-----------|------------|---|---|---|-----------|---------|--------|--------|--------|-------|
| 17 | 51907580  | rs1442831  | A | T | 4 | 0.000816  | 0.01214 | 1.1435 | 1.1344 | 0.2553 | 26.06 |
| 10 | 112017646 | rs3793889  | A | G | 4 | 0.001232  | 0.01234 | 1.2507 | 1.2535 | 0.2388 | 28.89 |
| 20 | 5209578   | rs4597612  | G | T | 4 | 0.0001171 | 0.01236 | 0.8715 | 0.859  | 0.0986 | 52.25 |
| 17 | 51911802  | rs11653462 | G | T | 4 | 0.0008719 | 0.01269 | 0.8751 | 0.8822 | 0.255  | 26.12 |
| 6  | 155209126 | rs9384246  | C | T | 3 | 0.0003802 | 0.01289 | 0.6207 | 0.6514 | 0.2847 | 20.4  |
| 8  | 3339206   | rs10103966 | C | G | 4 | 0.000532  | 0.01326 | 1.1636 | 1.1626 | 0.1863 | 37.63 |
| 13 | 45339590  | rs4942456  | A | G | 4 | 2.24E-05  | 0.01369 | 0.6923 | 0.6557 | 0.0409 | 63.68 |
| 10 | 111979315 | rs17127166 | A | G | 4 | 0.001271  | 0.01393 | 0.7996 | 0.793  | 0.2192 | 32.18 |
| 17 | 51884770  | rs7218500  | C | T | 4 | 0.0005648 | 0.0141  | 0.871  | 0.8798 | 0.2312 | 30.17 |
| 4  | 82337376  | rs4149     | C | T | 3 | 0.0006824 | 0.01411 | 0.756  | 0.7593 | 0.2002 | 37.84 |
| 19 | 56890466  | rs12462673 | A | G | 3 | 9.34E-06  | 0.01422 | 0.5674 | 0.5028 | 0.024  | 73.19 |
| 3  | 59332476  | rs2366434  | A | G | 4 | 0.000909  | 0.01438 | 1.1272 | 1.1153 | 0.2642 | 24.52 |
| 7  | 52130574  | rs4473990  | A | G | 4 | 0.001023  | 0.01466 | 0.8679 | 0.8651 | 0.1975 | 35.78 |
| 2  | 123106179 | rs11897702 | C | T | 4 | 4.73E-05  | 0.01473 | 1.1615 | 1.1403 | 0.1555 | 42.68 |
| 7  | 52130379  | rs4498494  | A | G | 4 | 0.001107  | 0.01489 | 1.15   | 1.1547 | 0.1975 | 35.79 |
| 10 | 30520525  | rs6481661  | C | T | 4 | 0.0001449 | 0.01581 | 0.8635 | 0.8792 | 0.1954 | 36.12 |
| 4  | 82313093  | rs1972127  | A | G | 3 | 0.0007979 | 0.0166  | 1.2831 | 1.2761 | 0.2031 | 37.26 |
| 13 | 45341521  | rs17067329 | A | T | 4 | 3.07E-05  | 0.01687 | 0.6982 | 0.6642 | 0.038  | 64.4  |
| 13 | 45341888  | rs7998666  | G | T | 4 | 3.21E-05  | 0.01706 | 1.4327 | 1.5166 | 0.0349 | 65.18 |
| 4  | 82314024  | rs3943629  | A | T | 3 | 0.0008114 | 0.01724 | 0.7796 | 0.7839 | 0.2009 | 37.7  |
| 10 | 30526790  | rs11007929 | C | T | 4 | 0.0001673 | 0.01781 | 0.8639 | 0.8802 | 0.1928 | 36.55 |
| 16 | 26204460  | rs12443717 | A | T | 4 | 0.002338  | 0.01787 | 0.877  | 0.8838 | 0.2797 | 21.8  |
| 17 | 47289896  | rs8076116  | G | T | 4 | 0.001502  | 0.01802 | 1.3178 | 1.3011 | 0.2389 | 28.86 |
| 5  | 2532184   | rs10058639 | A | G | 3 | 0.0007471 | 0.0181  | 0.8701 | 0.8743 | 0.1906 | 39.66 |
| 3  | 22448096  | rs9861611  | C | T | 4 | 0.002784  | 0.01836 | 1.1539 | 1.1456 | 0.2805 | 21.66 |
| 7  | 69791004  | rs6946693  | G | T | 4 | 0.0008838 | 0.0186  | 1.1321 | 1.1666 | 0.0624 | 59    |
| 22 | 37038552  | rs867198   | C | T | 4 | 0.004549  | 0.01892 | 0.798  | 0.8057 | 0.3151 | 15.35 |
| 13 | 45343013  | rs7982931  | C | T | 4 | 3.87E-05  | 0.01924 | 1.4238 | 1.5083 | 0.032  | 65.93 |
| 11 | 19040692  | rs12222200 | C | T | 4 | 0.00223   | 0.01941 | 0.8954 | 0.8621 | 0.0622 | 59.06 |
| 2  | 200960600 | rs3769450  | A | G | 4 | 0.001514  | 0.01951 | 1.1275 | 1.126  | 0.21   | 33.72 |
| 11 | 23644504  | rs1879036  | A | G | 2 | 0.001499  | 0.01998 | 2.8436 | 2.6724 | 0.2276 | 31.3  |
| 11 | 23641651  | rs11027422 | C | G | 2 | 0.001492  | 0.02005 | 2.8447 | 2.6729 | 0.2274 | 31.38 |
| 5  | 2546280   | rs2453814  | A | C | 4 | 0.0001917 | 0.02011 | 1.1406 | 1.1374 | 0.1171 | 49.06 |
| 17 | 51825310  | rs4794639  | A | G | 4 | 0.0003365 | 0.02014 | 0.8628 | 0.8755 | 0.1909 | 36.87 |
| 11 | 23639466  | rs7122399  | C | G | 2 | 0.001497  | 0.02019 | 0.3516 | 0.3743 | 0.2271 | 31.46 |
| 11 | 23644526  | rs1879035  | C | T | 2 | 0.001454  | 0.02048 | 0.3506 | 0.3737 | 0.2255 | 31.92 |
| 11 | 23637818  | rs12295501 | C | G | 2 | 0.001522  | 0.02052 | 2.845  | 2.6721 | 0.2265 | 31.64 |



|    |           |            |   |   |   |           |         |        |        |        |       |
|----|-----------|------------|---|---|---|-----------|---------|--------|--------|--------|-------|
| 5  | 2525928   | rs6555113  | A | T | 4 | 4.29E-05  | 0.02065 | 1.1674 | 1.1554 | 0.0916 | 53.51 |
| 4  | 175716769 | rs10520281 | A | G | 3 | 0.002138  | 0.02083 | 1.2286 | 1.2312 | 0.2162 | 34.71 |
| 8  | 3342219   | rs1499682  | A | T | 4 | 0.0007761 | 0.02117 | 0.8647 | 0.864  | 0.1551 | 42.73 |
| 11 | 23645887  | rs7114872  | C | T | 2 | 0.001337  | 0.02126 | 2.8689 | 2.6838 | 0.2216 | 33.06 |
| 6  | 17953140  | rs9396812  | A | G | 4 | 0.001399  | 0.02146 | 0.8938 | 0.8572 | 0.0353 | 65.08 |
| 4  | 175716127 | rs7671048  | C | T | 3 | 0.002364  | 0.02203 | 1.2261 | 1.2288 | 0.2163 | 34.69 |
| 10 | 30510832  | rs473195   | C | T | 4 | 0.0001006 | 0.0223  | 0.8606 | 0.8797 | 0.164  | 41.28 |
| 4  | 82315844  | rs10516650 | A | C | 3 | 0.001007  | 0.02248 | 1.2784 | 1.2717 | 0.1868 | 40.39 |
| 5  | 2534088   | rs3112426  | A | C | 4 | 7.26E-05  | 0.02255 | 1.1565 | 1.1471 | 0.0948 | 52.92 |
| 10 | 30535057  | rs10826770 | A | G | 4 | 0.0001361 | 0.02291 | 0.8623 | 0.8812 | 0.1716 | 40.04 |
| 5  | 2521375   | rs924134   | A | C | 4 | 4.79E-05  | 0.02348 | 0.8617 | 0.8699 | 0.0835 | 54.96 |
| 10 | 30532611  | rs2151114  | A | G | 4 | 0.000155  | 0.02354 | 1.1584 | 1.1338 | 0.1751 | 39.47 |
| 2  | 123108773 | rs987707   | C | T | 4 | 2.16E-05  | 0.02358 | 1.1718 | 1.143  | 0.1086 | 50.51 |
| 17 | 51771638  | rs8082579  | G | T | 4 | 7.72E-05  | 0.02393 | 0.8501 | 0.865  | 0.1197 | 48.62 |
| 4  | 82316475  | rs10516651 | C | T | 3 | 0.001163  | 0.02411 | 0.7838 | 0.7873 | 0.1854 | 40.67 |
| 8  | 59543277  | rs6471719  | C | T | 4 | 0.004522  | 0.02438 | 0.8927 | 0.8959 | 0.2703 | 23.46 |
| 4  | 82316801  | rs10003341 | A | C | 3 | 0.001254  | 0.02469 | 0.7842 | 0.7873 | 0.185  | 40.74 |
| 4  | 82316860  | rs10005912 | G | T | 3 | 0.001382  | 0.02489 | 1.2739 | 1.2698 | 0.187  | 40.37 |
| 17 | 51856204  | rs2215759  | A | G | 4 | 0.0002815 | 0.02582 | 1.1622 | 1.1411 | 0.1714 | 40.07 |
| 20 | 46386093  | rs6066696  | A | T | 4 | 0.0007842 | 0.02587 | 0.8783 | 0.8796 | 0.1491 | 43.72 |
| 2  | 123110041 | rs17039782 | C | T | 4 | 1.96E-05  | 0.02595 | 0.8526 | 0.8752 | 0.1013 | 51.78 |
| 6  | 29820738  | rs2844845  | A | T | 4 | 0.0006465 | 0.02612 | 1.1719 | 1.1507 | 0.2082 | 34.01 |
| 2  | 123110875 | rs4848185  | A | G | 4 | 1.78E-05  | 0.02647 | 1.1738 | 1.1431 | 0.0982 | 52.33 |
| 10 | 111996476 | rs716595   | A | G | 4 | 0.00202   | 0.02705 | 0.8087 | 0.8032 | 0.1799 | 38.67 |
| 1  | 38656605  | rs6600426  | A | G | 4 | 0.0007462 | 0.02799 | 1.1672 | 1.2126 | 0.0333 | 65.6  |
| 13 | 45344451  | rs17067344 | C | T | 4 | 6.70E-05  | 0.02815 | 0.7091 | 0.6655 | 0.0213 | 69.06 |
| 11 | 23636292  | rs12292038 | A | G | 2 | 0.001071  | 0.02833 | 3.2369 | 2.9944 | 0.1832 | 43.55 |
| 17 | 51850895  | rs9899359  | C | G | 4 | 0.000379  | 0.02868 | 1.1584 | 1.138  | 0.1729 | 39.82 |
| 8  | 59547229  | rs6471720  | A | G | 4 | 0.004912  | 0.02883 | 0.8937 | 0.8968 | 0.2561 | 25.92 |
| 4  | 82319684  | rs11099460 | A | C | 3 | 0.001632  | 0.02956 | 1.2705 | 1.2672 | 0.1773 | 42.19 |
| 7  | 148246576 | rs7804456  | C | T | 4 | 0.001229  | 0.02972 | 1.1453 | 1.1702 | 0.0666 | 58.18 |
| 3  | 22206935  | rs1994727  | A | T | 4 | 0.003928  | 0.02996 | 0.8772 | 0.883  | 0.2494 | 27.09 |
| 5  | 168156259 | rs4867939  | C | T | 4 | 0.0009817 | 0.03038 | 1.1242 | 1.1328 | 0.0982 | 52.32 |
| 3  | 32247502  | rs9813563  | C | G | 4 | 0.004039  | 0.03079 | 1.1417 | 1.132  | 0.2622 | 24.87 |
| 12 | 13267994  | rs7962943  | A | G | 4 | 0.002104  | 0.03106 | 1.2496 | 1.3154 | 0.0845 | 54.78 |
| 13 | 45343085  | rs7983269  | A | G | 4 | 9.72E-05  | 0.03149 | 0.7165 | 0.6686 | 0.0182 | 70.14 |
| 1  | 150047352 | rs11588258 | A | T | 4 | 0.00166   | 0.03156 | 1.1921 | 1.2039 | 0.1359 | 45.91 |

|    |           |            |   |   |   |           |         |        |        |        |       |
|----|-----------|------------|---|---|---|-----------|---------|--------|--------|--------|-------|
| 12 | 13268178  | rs7966096  | C | T | 4 | 0.002168  | 0.0326  | 0.7998 | 0.7602 | 0.0819 | 55.26 |
| 1  | 150047310 | rs11588634 | A | T | 4 | 0.001483  | 0.0327  | 0.8371 | 0.8303 | 0.1309 | 46.74 |
| 5  | 149554979 | rs17708892 | A | G | 3 | 0.003344  | 0.03314 | 1.5077 | 1.4434 | 0.3016 | 16.56 |
| 4  | 9887927   | rs16895848 | A | T | 3 | 0.000614  | 0.0346  | 2.6334 | 2.3028 | 0.1941 | 39    |
| 5  | 2541341   | rs1992827  | C | T | 4 | 0.0001258 | 0.0353  | 0.8689 | 0.8759 | 0.0744 | 56.66 |
| 21 | 40065876  | rs2837202  | A | T | 4 | 0.0002497 | 0.03634 | 0.877  | 0.8891 | 0.1164 | 49.18 |
| 4  | 9892151   | rs16895934 | G | T | 3 | 0.0005487 | 0.03678 | 2.6418 | 2.2957 | 0.1879 | 40.19 |
| 11 | 11073168  | rs745231   | C | T | 3 | 0.0007694 | 0.03711 | 1.164  | 1.1374 | 0.2485 | 28.18 |
| 7  | 52134879  | rs6965611  | G | T | 3 | 0.0009679 | 0.03721 | 0.8611 | 0.859  | 0.1167 | 53.46 |
| 8  | 3343653   | rs2100119  | A | G | 4 | 0.001063  | 0.03777 | 1.151  | 1.1526 | 0.1098 | 50.32 |
| 3  | 124840968 | rs1254403  | A | C | 4 | 0.0007755 | 0.03786 | 0.7742 | 0.7857 | 0.116  | 49.24 |
| 14 | 77087999  | rs11159275 | C | T | 4 | 0.005001  | 0.03828 | 1.111  | 1.1734 | 0.0187 | 69.94 |
| 5  | 2563027   | rs3099592  | A | G | 4 | 0.001516  | 0.03859 | 1.1209 | 1.1165 | 0.1512 | 43.38 |
| 4  | 82314170  | rs1545287  | A | G | 3 | 0.001461  | 0.03901 | 1.2683 | 1.2612 | 0.1531 | 46.71 |
| 5  | 164229034 | rs7723455  | A | C | 4 | 0.002599  | 0.04053 | 0.8852 | 0.8796 | 0.1254 | 47.66 |
| 10 | 91289457  | rs11185747 | A | T | 2 | 0.00199   | 0.04229 | 1.8414 | 1.74   | 0.2225 | 32.82 |
| 17 | 51779870  | rs1547966  | C | T | 4 | 0.0001114 | 0.04293 | 1.1722 | 1.1479 | 0.09   | 53.78 |
| 9  | 19654081  | rs4258076  | G | T | 4 | 0.001569  | 0.04305 | 1.1242 | 1.1091 | 0.1893 | 37.12 |
| 17 | 51873068  | rs7220133  | C | T | 4 | 0.0003202 | 0.04385 | 1.1595 | 1.135  | 0.1348 | 46.09 |
| 1  | 89361971  | rs10922574 | C | T | 4 | 0.009713  | 0.04539 | 0.8849 | 0.8319 | 0.0379 | 64.41 |
| 8  | 120020186 | rs3102725  | A | G | 4 | 0.001911  | 0.04564 | 1.2543 | 1.2653 | 0.1003 | 51.96 |
| 5  | 164230439 | rs2962852  | A | G | 4 | 0.004158  | 0.04596 | 0.8906 | 0.889  | 0.1581 | 42.24 |
| 9  | 77922888  | rs1467773  | A | G | 3 | 0.0008821 | 0.04755 | 1.2074 | 1.2194 | 0.0799 | 60.42 |
| 5  | 164230392 | rs2962851  | A | G | 4 | 0.004329  | 0.04823 | 0.8911 | 0.8894 | 0.1544 | 42.85 |
| 5  | 141067873 | rs17097481 | C | T | 4 | 0.004361  | 0.04827 | 1.1682 | 1.1537 | 0.2141 | 33.03 |
| 1  | 219585205 | rs4465211  | A | G | 4 | 0.008567  | 0.04852 | 1.0989 | 1.1492 | 0.0287 | 66.85 |
| 17 | 51862430  | rs7213627  | G | T | 4 | 0.0003816 | 0.04891 | 0.8632 | 0.8835 | 0.1363 | 45.84 |
| 12 | 115293528 | rs6490059  | C | T | 4 | 0.005832  | 0.04903 | 1.2171 | 1.2074 | 0.214  | 33.04 |
| 7  | 52086483  | rs10256394 | C | T | 4 | 0.0004993 | 0.04904 | 0.8638 | 0.8596 | 0.0499 | 61.62 |
| 1  | 219584095 | rs6671621  | C | G | 4 | 0.008858  | 0.04908 | 1.0985 | 1.1489 | 0.0285 | 66.88 |
| 22 | 17962066  | rs5992433  | C | T | 4 | 0.004432  | 0.04932 | 1.1046 | 1.1027 | 0.175  | 39.48 |
| 1  | 219588044 | rs10863604 | C | G | 4 | 0.0088    | 0.04934 | 1.0986 | 1.1492 | 0.0278 | 67.1  |
| 1  | 89403309  | rs2893089  | G | T | 4 | 0.01211   | 0.04942 | 1.1262 | 1.2021 | 0.0341 | 65.38 |
| 6  | 41399102  | rs9462696  | A | T | 4 | 0.0003237 | 0.04967 | 0.8791 | 0.8923 | 0.0989 | 52.21 |
| 17 | 51868565  | rs4793818  | G | T | 4 | 0.0002563 | 0.04985 | 1.1621 | 1.1346 | 0.1204 | 48.5  |
| 6  | 41398747  | rs9471555  | C | T | 4 | 0.0003387 | 0.05    | 0.8794 | 0.8929 | 0.1011 | 51.81 |
| 3  | 63493882  | rs1505600  | C | G | 4 | 0.0001053 | 0.05043 | 0.8444 | 0.8697 | 0.094  | 53.06 |

|    |           |            |   |   |   |           |         |        |        |        |       |
|----|-----------|------------|---|---|---|-----------|---------|--------|--------|--------|-------|
| 15 | 36725969  | rs1122891  | C | G | 4 | 0.00456   | 0.05062 | 0.9054 | 0.9117 | 0.2094 | 33.82 |
| 4  | 132492216 | rs1316758  | C | T | 4 | 0.001775  | 0.05078 | 1.365  | 1.4102 | 0.0616 | 59.17 |
| 10 | 124144159 | rs17103488 | C | T | 4 | 0.002964  | 0.05086 | 0.8509 | 0.8642 | 0.1995 | 35.45 |
| 9  | 19652307  | rs10811225 | A | G | 4 | 0.002302  | 0.05095 | 0.8966 | 0.9094 | 0.2018 | 35.07 |
| 11 | 15201694  | rs1714336  | C | T | 4 | 0.008437  | 0.05096 | 0.9108 | 0.8799 | 0.0443 | 62.89 |
| 1  | 89277631  | rs2149186  | G | T | 4 | 0.008458  | 0.05101 | 0.8787 | 0.8232 | 0.0281 | 67.01 |
| 6  | 29819726  | rs2523386  | A | G | 4 | 0.001164  | 0.05272 | 1.163  | 1.1385 | 0.1715 | 40.04 |
| 7  | 82671810  | rs1557787  | C | T | 3 | 0.003708  | 0.05283 | 0.6457 | 0.5732 | 0.0413 | 68.62 |
| 11 | 15203462  | rs1714337  | A | G | 4 | 0.009253  | 0.05293 | 0.9118 | 0.8806 | 0.0436 | 63.04 |
| 14 | 82451964  | rs7160795  | C | T | 4 | 0.001913  | 0.05308 | 0.8792 | 0.8893 | 0.1554 | 42.7  |
| 22 | 17961830  | rs5993714  | A | G | 4 | 0.004672  | 0.05357 | 1.1039 | 1.1023 | 0.1663 | 40.9  |
| 2  | 126453217 | rs10496652 | A | G | 4 | 0.007216  | 0.05502 | 0.8995 | 0.8679 | 0.0455 | 62.61 |
| 5  | 2561221   | rs3112414  | C | G | 4 | 0.0009342 | 0.05516 | 1.126  | 1.1238 | 0.0778 | 56.02 |
| 4  | 132488079 | rs11931096 | C | T | 4 | 0.002023  | 0.0552  | 0.7347 | 0.7104 | 0.0578 | 59.95 |
| 1  | 219578338 | rs4313406  | C | T | 4 | 0.01152   | 0.05562 | 0.9133 | 0.8721 | 0.0255 | 67.75 |
| 1  | 219579859 | rs6690986  | C | T | 4 | 0.01152   | 0.05562 | 0.9133 | 0.8721 | 0.0255 | 67.75 |
| 8  | 53656739  | rs17329730 | A | T | 4 | 0.002968  | 0.05581 | 1.1115 | 1.1298 | 0.0569 | 60.13 |
| 4  | 182929362 | rs12508055 | A | G | 3 | 0.001541  | 0.05587 | 1.1619 | 1.1989 | 0.0686 | 62.68 |
| 4  | 132486892 | rs17051178 | G | T | 4 | 0.002095  | 0.056   | 1.3608 | 1.4072 | 0.0577 | 59.97 |
| 4  | 132501459 | rs4585325  | C | T | 4 | 0.00224   | 0.05617 | 0.7371 | 0.7129 | 0.0597 | 59.56 |
| 7  | 52115801  | rs11979834 | A | G | 4 | 0.0005475 | 0.05665 | 0.8647 | 0.86   | 0.0406 | 63.75 |
| 4  | 132508352 | rs8180150  | A | C | 4 | 0.002366  | 0.05674 | 1.3533 | 1.3985 | 0.0611 | 59.27 |
| 11 | 15201097  | rs1792556  | G | T | 4 | 0.011     | 0.05691 | 1.0944 | 1.1339 | 0.0422 | 63.37 |
| 13 | 31563969  | rs17591593 | C | G | 4 | 0.01613   | 0.05728 | 1.096  | 1.1467 | 0.0377 | 64.46 |
| 8  | 120025500 | rs3134061  | A | T | 4 | 0.002502  | 0.0575  | 1.2471 | 1.2591 | 0.0861 | 54.49 |
| 1  | 219590026 | rs10863605 | A | G | 4 | 0.01126   | 0.05757 | 1.0993 | 1.1499 | 0.0274 | 67.21 |
| 4  | 132509434 | rs17051181 | C | T | 4 | 0.002469  | 0.05786 | 1.3516 | 1.397  | 0.0606 | 59.37 |
| 1  | 219574484 | rs6704485  | C | G | 4 | 0.01212   | 0.05804 | 1.0941 | 1.1466 | 0.0231 | 68.5  |
| 8  | 120025033 | rs3134059  | C | T | 4 | 0.002509  | 0.05848 | 1.2479 | 1.2589 | 0.0859 | 54.52 |
| 4  | 182929319 | rs12512046 | G | T | 3 | 0.001757  | 0.05899 | 1.1598 | 1.198  | 0.0658 | 63.25 |
| 22 | 17961946  | rs5993715  | G | T | 4 | 0.005061  | 0.05914 | 1.103  | 1.1013 | 0.1582 | 42.24 |
| 8  | 120024531 | rs3102726  | A | T | 4 | 0.002572  | 0.05915 | 0.8018 | 0.7946 | 0.0854 | 54.62 |
| 4  | 132486687 | rs17051177 | A | G | 4 | 0.002374  | 0.05919 | 1.3547 | 1.4021 | 0.0562 | 60.27 |
| 8  | 120028459 | rs3134062  | A | G | 4 | 0.002583  | 0.0594  | 0.8019 | 0.7948 | 0.0853 | 54.64 |
| 8  | 120025686 | rs3102729  | A | G | 4 | 0.002552  | 0.05941 | 1.2474 | 1.2585 | 0.0848 | 54.73 |
| 8  | 120028570 | rs3102731  | A | G | 4 | 0.002552  | 0.05941 | 1.2474 | 1.2585 | 0.0848 | 54.73 |
| 8  | 120029532 | rs3134066  | A | T | 4 | 0.002507  | 0.05942 | 0.8014 | 0.7944 | 0.0839 | 54.89 |

|    |           |            |   |   |   |           |         |        |        |        |       |
|----|-----------|------------|---|---|---|-----------|---------|--------|--------|--------|-------|
| 8  | 120030619 | rs3134067  | C | T | 4 | 0.002507  | 0.05942 | 0.8014 | 0.7944 | 0.0839 | 54.89 |
| 8  | 120031301 | rs3102733  | C | T | 4 | 0.002523  | 0.05957 | 1.2476 | 1.2586 | 0.084  | 54.88 |
| 8  | 120031840 | rs3134068  | C | T | 4 | 0.002488  | 0.05962 | 1.248  | 1.2589 | 0.0834 | 54.99 |
| 8  | 120033197 | rs3102734  | A | G | 4 | 0.002488  | 0.05962 | 1.248  | 1.2589 | 0.0834 | 54.99 |
| 4  | 82301012  | rs6828114  | C | T | 4 | 0.001851  | 0.05976 | 1.2469 | 1.2134 | 0.1741 | 39.62 |
| 4  | 132509387 | rs8180189  | C | T | 4 | 0.002664  | 0.05982 | 0.7416 | 0.7172 | 0.0599 | 59.52 |
| 1  | 219574269 | rs6704281  | C | T | 4 | 0.01289   | 0.05989 | 1.0933 | 1.1462 | 0.0221 | 68.8  |
| 4  | 132503523 | rs1343670  | C | T | 4 | 0.002758  | 0.06018 | 1.346  | 1.3924 | 0.0602 | 59.46 |
| 17 | 51788210  | rs9915451  | A | G | 4 | 0.000125  | 0.06023 | 1.1709 | 1.1377 | 0.0885 | 54.05 |
| 12 | 82371672  | rs17010837 | A | G | 3 | 0.001342  | 0.06069 | 1.3773 | 1.3982 | 0.0617 | 64.1  |
| 13 | 98303633  | rs9513497  | C | T | 4 | 0.0256    | 0.06108 | 1.0819 | 1.152  | 0.0131 | 72.13 |
| 7  | 84546498  | rs13222785 | A | G | 4 | 0.005003  | 0.06119 | 1.1528 | 1.2417 | 0.0056 | 76.19 |
| 8  | 73172373  | rs2587579  | C | T | 4 | 0.01208   | 0.06157 | 1.1117 | 1.16   | 0.035  | 65.14 |
| 8  | 73173101  | rs2587580  | C | G | 4 | 0.01199   | 0.0618  | 0.9    | 0.8625 | 0.0345 | 65.27 |
| 4  | 132476044 | rs11940669 | C | T | 4 | 0.002532  | 0.06185 | 0.7391 | 0.7138 | 0.0541 | 60.72 |
| 4  | 132508470 | rs4146422  | C | T | 4 | 0.002994  | 0.06298 | 0.7437 | 0.719  | 0.0589 | 59.72 |
| 8  | 120025224 | rs3134060  | A | G | 4 | 0.002808  | 0.06314 | 0.8039 | 0.7957 | 0.0797 | 55.67 |
| 4  | 132536774 | rs11099102 | C | T | 4 | 0.00315   | 0.06321 | 1.3458 | 1.3858 | 0.0662 | 58.26 |
| 8  | 73175604  | rs2701439  | C | G | 4 | 0.01319   | 0.06368 | 0.9001 | 0.862  | 0.0338 | 65.45 |
| 8  | 120034205 | rs3134070  | C | T | 4 | 0.002679  | 0.06397 | 0.8026 | 0.7958 | 0.0793 | 55.74 |
| 4  | 132537559 | rs11936773 | G | T | 4 | 0.003289  | 0.06421 | 0.7435 | 0.7221 | 0.0663 | 58.24 |
| 6  | 29810185  | rs2844833  | C | G | 3 | 0.0009201 | 0.0645  | 0.804  | 0.8369 | 0.231  | 31.75 |
| 8  | 120034169 | rs3134069  | A | C | 4 | 0.002725  | 0.06494 | 0.8029 | 0.796  | 0.0782 | 55.94 |
| 8  | 120035902 | rs3134073  | A | G | 4 | 0.002723  | 0.06496 | 0.8029 | 0.7964 | 0.0789 | 55.82 |
| 9  | 7904008   | rs10815714 | C | T | 4 | 0.002873  | 0.06501 | 1.1809 | 1.2027 | 0.0508 | 61.43 |
| 8  | 120037209 | rs12386956 | A | G | 4 | 0.002709  | 0.06522 | 1.2456 | 1.2557 | 0.0784 | 55.91 |
| 1  | 176952870 | rs2811280  | A | G | 4 | 0.0008286 | 0.06528 | 1.1299 | 1.1067 | 0.1414 | 45.01 |
| 8  | 120034718 | rs3134072  | C | T | 4 | 0.002748  | 0.06548 | 0.803  | 0.7962 | 0.078  | 55.98 |
| 4  | 136728154 | rs13146643 | A | G | 4 | 0.007011  | 0.06576 | 0.8913 | 0.8938 | 0.1662 | 40.92 |
| 17 | 51864068  | rs980080   | C | T | 4 | 0.0004076 | 0.06615 | 0.8638 | 0.8863 | 0.1126 | 49.83 |
| 4  | 136728035 | rs13122550 | C | T | 4 | 0.006909  | 0.06636 | 1.1222 | 1.119  | 0.1642 | 41.25 |
| 8  | 73174272  | rs2701441  | A | G | 4 | 0.01551   | 0.06679 | 0.9024 | 0.8638 | 0.0345 | 65.26 |
| 8  | 120038338 | rs4876872  | A | G | 4 | 0.002723  | 0.0668  | 0.803  | 0.7966 | 0.0761 | 56.34 |
| 4  | 82302241  | rs11722020 | C | T | 4 | 0.00208   | 0.06681 | 1.2451 | 1.2103 | 0.169  | 40.46 |
| 4  | 132412751 | rs17051170 | A | C | 4 | 0.001843  | 0.06687 | 1.3799 | 1.4529 | 0.0283 | 66.96 |
| 4  | 132421378 | rs10006868 | C | G | 4 | 0.001819  | 0.06698 | 0.7244 | 0.6878 | 0.0277 | 67.12 |
| 4  | 132412892 | rs17051172 | C | T | 4 | 0.001865  | 0.06703 | 1.3794 | 1.4525 | 0.0283 | 66.96 |

|    |           |            |   |   |   |           |         |        |        |        |       |
|----|-----------|------------|---|---|---|-----------|---------|--------|--------|--------|-------|
| 8  | 120039201 | rs4876873  | A | C | 4 | 0.002753  | 0.06704 | 1.245  | 1.2549 | 0.0763 | 56.31 |
| 4  | 132550197 | rs11945624 | A | G | 4 | 0.003563  | 0.06722 | 1.3406 | 1.3816 | 0.064  | 58.69 |
| 17 | 51864305  | rs10852984 | A | G | 4 | 0.0004122 | 0.06726 | 1.1575 | 1.1281 | 0.1113 | 50.05 |
| 8  | 120041852 | rs12335174 | G | T | 4 | 0.002746  | 0.06736 | 0.8031 | 0.7969 | 0.0759 | 56.39 |
| 7  | 84545533  | rs7809347  | A | G | 4 | 0.006094  | 0.06739 | 0.8703 | 0.8077 | 0.005  | 76.66 |
| 4  | 132409675 | rs12641606 | C | T | 4 | 0.001956  | 0.06743 | 1.3789 | 1.451  | 0.0292 | 66.68 |
| 8  | 120042745 | rs17758011 | G | T | 4 | 0.00281   | 0.06744 | 1.2445 | 1.2542 | 0.0767 | 56.23 |
| 4  | 132410530 | rs11947432 | A | G | 4 | 0.001997  | 0.06777 | 1.378  | 1.4503 | 0.0293 | 66.68 |
| 1  | 89290783  | rs2296883  | A | G | 4 | 0.02007   | 0.06782 | 1.1111 | 1.1699 | 0.0457 | 62.56 |
| 4  | 132422269 | rs11941498 | C | T | 4 | 0.001647  | 0.06787 | 1.3842 | 1.458  | 0.025  | 67.92 |
| 4  | 132424433 | rs17051173 | C | T | 4 | 0.001648  | 0.06824 | 1.3841 | 1.4583 | 0.0246 | 68.04 |
| 4  | 82312214  | rs1517547  | C | T | 2 | 0.001023  | 0.06825 | 0.7774 | 0.7807 | 0.0769 | 68.04 |
| 4  | 132426397 | rs2861393  | A | G | 4 | 0.001679  | 0.06859 | 1.3834 | 1.4576 | 0.0246 | 68.04 |
| 4  | 132565936 | rs12648650 | A | C | 4 | 0.003585  | 0.06894 | 0.7449 | 0.7231 | 0.0619 | 59.11 |
| 21 | 42619764  | rs225424   | A | G | 4 | 0.008243  | 0.06898 | 1.1019 | 1.1037 | 0.1483 | 43.86 |
| 4  | 136726126 | rs7662409  | C | G | 4 | 0.007048  | 0.06916 | 0.8914 | 0.8943 | 0.1616 | 41.67 |
| 8  | 73169428  | rs1530402  | A | G | 4 | 0.01686   | 0.06916 | 1.1081 | 1.157  | 0.0357 | 64.97 |
| 4  | 132404922 | rs9992638  | A | T | 4 | 0.002232  | 0.0692  | 0.7281 | 0.6915 | 0.0301 | 66.44 |
| 7  | 84537323  | rs6966472  | C | T | 4 | 0.00565   | 0.06939 | 1.1502 | 1.2352 | 0.005  | 76.66 |
| 8  | 73170538  | rs2701449  | C | T | 4 | 0.0176    | 0.06945 | 0.903  | 0.865  | 0.037  | 64.64 |
| 4  | 136725872 | rs13131704 | A | T | 4 | 0.007104  | 0.06955 | 0.8915 | 0.8945 | 0.1617 | 41.66 |
| 7  | 84540088  | rs6957484  | G | T | 4 | 0.005776  | 0.06964 | 0.8696 | 0.8092 | 0.0049 | 76.75 |
| 4  | 74413190  | rs4694161  | A | G | 4 | 0.01015   | 0.06971 | 1.3005 | 1.4144 | 0.0326 | 65.77 |
| 6  | 29816396  | rs2517941  | C | G | 4 | 0.001363  | 0.06979 | 0.8615 | 0.8823 | 0.1546 | 42.82 |
| 4  | 136725857 | rs12643192 | C | G | 4 | 0.007161  | 0.06996 | 0.8916 | 0.8946 | 0.1618 | 41.65 |
| 7  | 84534250  | rs16887821 | C | G | 4 | 0.005698  | 0.07002 | 1.1492 | 1.2334 | 0.005  | 76.62 |
| 4  | 74411672  | rs6821554  | A | G | 4 | 0.01221   | 0.07013 | 1.2969 | 1.421  | 0.0336 | 65.5  |
| 4  | 136728247 | rs13122996 | A | T | 4 | 0.007434  | 0.07034 | 1.1211 | 1.118  | 0.1602 | 41.9  |
| 13 | 74984164  | rs17064600 | C | T | 3 | 0.001028  | 0.07042 | 0.8689 | 0.8858 | 0.1269 | 51.55 |
| 1  | 89290761  | rs2296882  | A | T | 4 | 0.02202   | 0.07049 | 1.11   | 1.1693 | 0.0451 | 62.7  |
| 12 | 2779406   | rs3021522  | C | G | 4 | 0.002187  | 0.07075 | 0.7589 | 0.7907 | 0.1804 | 38.59 |
| 4  | 132410710 | rs10518587 | G | T | 4 | 0.002325  | 0.07076 | 1.3705 | 1.4437 | 0.0292 | 66.69 |
| 4  | 132429544 | rs2861394  | A | G | 4 | 0.00187   | 0.07087 | 1.3757 | 1.4509 | 0.0243 | 68.13 |
| 7  | 84542645  | rs2286192  | C | T | 4 | 0.006318  | 0.07091 | 1.1486 | 1.2364 | 0.0048 | 76.81 |
| 3  | 124831466 | rs820446   | C | T | 4 | 0.00164   | 0.07116 | 1.2687 | 1.2581 | 0.0681 | 57.88 |
| 8  | 73171160  | rs1443942  | A | C | 4 | 0.01884   | 0.07121 | 0.904  | 0.8658 | 0.0369 | 64.67 |
| 20 | 8465895   | rs2179441  | A | C | 3 | 0.005354  | 0.07126 | 0.8716 | 0.8259 | 0.0491 | 66.82 |

|    |           |            |   |   |   |           |         |        |        |        |       |
|----|-----------|------------|---|---|---|-----------|---------|--------|--------|--------|-------|
| 4  | 74412327  | rs6446920  | C | T | 4 | 0.01077   | 0.07136 | 1.3013 | 1.4163 | 0.0323 | 65.84 |
| 4  | 74419872  | rs4336191  | C | T | 4 | 0.01024   | 0.07136 | 1.3027 | 1.4184 | 0.0308 | 66.25 |
| 18 | 48362228  | rs4940191  | A | G | 4 | 0.00441   | 0.07142 | 0.8662 | 0.8655 | 0.1166 | 49.14 |
| 4  | 132434465 | rs4624669  | A | G | 4 | 0.001321  | 0.0715  | 0.718  | 0.68   | 0.018  | 70.21 |
| 7  | 84529379  | rs16887818 | C | G | 4 | 0.005795  | 0.0715  | 0.8737 | 0.8252 | 0.0095 | 73.81 |
| 17 | 47371272  | rs1501259  | A | T | 4 | 0.007544  | 0.0715  | 0.7383 | 0.7501 | 0.1688 | 40.5  |
| 4  | 74415477  | rs6446922  | A | G | 4 | 0.01092   | 0.07158 | 0.7694 | 0.7062 | 0.0318 | 65.97 |
| 11 | 10833019  | rs2232918  | A | G | 4 | 0.001726  | 0.07176 | 0.8106 | 0.8234 | 0.1051 | 51.13 |
| 8  | 73171725  | rs1838285  | C | T | 4 | 0.01928   | 0.07181 | 0.9044 | 0.866  | 0.0368 | 64.69 |
| 4  | 1664607   | rs8051     | C | T | 3 | 0.0001863 | 0.07188 | 1.1556 | 1.1267 | 0.0856 | 59.31 |
| 8  | 73168913  | rs2701450  | A | T | 4 | 0.0188    | 0.07195 | 0.904  | 0.8654 | 0.0353 | 65.06 |
| 7  | 84530877  | rs2240394  | C | T | 4 | 0.005749  | 0.07218 | 1.1455 | 1.2123 | 0.0096 | 73.77 |
| 2  | 40152968  | rs6544307  | T | C | 3 | 0.006001  | 0.07221 | 1.1532 | 1.2797 | 0.0082 | 79.17 |
| 11 | 10831170  | rs2232928  | A | G | 4 | 0.001745  | 0.07225 | 1.2334 | 1.2141 | 0.1049 | 51.16 |
| 4  | 74418309  | rs4274815  | A | T | 4 | 0.01099   | 0.07286 | 1.2994 | 1.4147 | 0.0314 | 66.1  |
| 4  | 132437567 | rs10008591 | C | T | 4 | 0.001341  | 0.07301 | 0.7183 | 0.6809 | 0.0177 | 70.33 |
| 21 | 33332334  | rs2834072  | A | G | 4 | 0.003881  | 0.07307 | 0.9042 | 0.8783 | 0.0175 | 70.39 |
| 8  | 73175388  | rs2701440  | C | T | 4 | 0.02013   | 0.07319 | 1.1037 | 1.1539 | 0.0344 | 65.29 |
| 1  | 89290506  | rs12408132 | C | T | 4 | 0.02455   | 0.07357 | 0.9014 | 0.8529 | 0.0397 | 63.97 |
| 21 | 33329836  | rs743331   | C | T | 4 | 0.003938  | 0.07362 | 1.1058 | 1.1363 | 0.0197 | 69.6  |
| 6  | 29817265  | rs2743950  | C | T | 4 | 0.001379  | 0.07387 | 0.8617 | 0.883  | 0.1491 | 43.72 |
| 1  | 89290653  | rs1048848  | C | G | 4 | 0.02445   | 0.07391 | 0.9025 | 0.8564 | 0.0442 | 62.91 |
| 8  | 26559908  | rs4076071  | C | T | 4 | 0.01204   | 0.07415 | 1.1555 | 1.2269 | 0.0297 | 66.54 |
| 8  | 10719627  | rs7005531  | A | G | 4 | 0.01378   | 0.07454 | 0.9048 | 0.8729 | 0.0476 | 62.15 |
| 8  | 10717307  | rs2409651  | C | T | 4 | 0.01387   | 0.07465 | 1.1051 | 1.1457 | 0.0476 | 62.15 |
| 4  | 74419733  | rs4408930  | A | G | 4 | 0.01183   | 0.07522 | 1.2953 | 1.4113 | 0.0307 | 66.29 |
| 13 | 98305163  | rs4772149  | C | T | 4 | 0.0273    | 0.07569 | 1.0817 | 1.1369 | 0.0214 | 69.05 |
| 1  | 89290398  | rs6675866  | C | T | 4 | 0.02562   | 0.07571 | 1.1071 | 1.1672 | 0.043  | 63.2  |
| 13 | 98311123  | rs9517467  | A | C | 4 | 0.03697   | 0.07578 | 0.928  | 0.8741 | 0.0142 | 71.67 |
| 10 | 80752296  | rs11002926 | A | C | 4 | 0.01604   | 0.07584 | 1.1041 | 1.1663 | 0.0174 | 70.4  |
| 4  | 136727429 | rs13145036 | A | G | 4 | 0.007593  | 0.07617 | 0.8923 | 0.8952 | 0.152  | 43.26 |
| 7  | 84530345  | rs4461846  | C | T | 4 | 0.006508  | 0.07618 | 0.8747 | 0.8261 | 0.009  | 74.1  |
| 15 | 46652089  | rs12915677 | C | T | 4 | 0.004047  | 0.07621 | 0.8838 | 0.8826 | 0.0937 | 53.13 |
| 13 | 98300600  | rs2296991  | C | T | 4 | 0.0185    | 0.07633 | 0.8903 | 0.8047 | 0.0013 | 80.93 |
| 4  | 74420504  | rs4345145  | C | T | 4 | 0.01191   | 0.07662 | 0.7722 | 0.7077 | 0.0287 | 66.84 |
| 4  | 132578708 | rs12649130 | C | G | 4 | 0.004418  | 0.07678 | 0.7499 | 0.727  | 0.058  | 59.91 |
| 4  | 82292319  | rs3733550  | C | T | 4 | 0.002288  | 0.07694 | 0.8057 | 0.8298 | 0.1571 | 42.41 |

|    |           |            |   |   |   |          |         |        |        |        |       |
|----|-----------|------------|---|---|---|----------|---------|--------|--------|--------|-------|
| 8  | 10721186  | rs2271356  | A | T | 4 | 0.01484  | 0.07784 | 0.9052 | 0.8719 | 0.043  | 63.2  |
| 13 | 98288560  | rs7333687  | A | G | 4 | 0.03144  | 0.07791 | 0.9277 | 0.8776 | 0.014  | 71.73 |
| 3  | 124839727 | rs820463   | A | G | 4 | 0.002085 | 0.07795 | 0.8006 | 0.798  | 0.0526 | 61.04 |
| 13 | 98293824  | rs913560   | A | G | 4 | 0.03117  | 0.07839 | 0.9275 | 0.8768 | 0.0131 | 72.11 |
| 6  | 28316514  | rs1150711  | C | T | 4 | 0.02655  | 0.07868 | 0.9164 | 0.8658 | 0.0206 | 69.29 |
| 15 | 58798563  | rs2414680  | A | G | 4 | 0.01592  | 0.07874 | 1.1063 | 1.2309 | 0.0004 | 83.69 |
| 13 | 98302606  | rs7321357  | C | T | 4 | 0.02705  | 0.07881 | 0.8967 | 0.8068 | 0.0015 | 80.56 |
| 13 | 98305323  | rs4772150  | C | T | 4 | 0.03646  | 0.07893 | 1.0779 | 1.1334 | 0.0257 | 67.71 |
| 8  | 10720735  | rs7824384  | A | C | 4 | 0.0154   | 0.07931 | 1.1041 | 1.1451 | 0.0453 | 62.67 |
| 4  | 136735906 | rs7692855  | C | T | 4 | 0.007584 | 0.07941 | 0.8909 | 0.8886 | 0.1273 | 47.34 |
| 15 | 58797094  | rs17303111 | C | T | 4 | 0.01594  | 0.07992 | 0.906  | 0.815  | 0.0003 | 84    |
| 13 | 98286664  | rs9300518  | C | T | 4 | 0.03333  | 0.08006 | 1.0783 | 1.1414 | 0.0128 | 72.25 |
| 10 | 3888018   | rs17135903 | C | T | 3 | 0.002374 | 0.08009 | 0.5193 | 0.4382 | 0.029  | 71.75 |
| 6  | 29818607  | rs730858   | A | G | 4 | 0.001514 | 0.08055 | 1.159  | 1.1305 | 0.144  | 44.57 |
| 2  | 26381302  | rs11902679 | C | T | 4 | 0.006007 | 0.08078 | 0.7273 | 0.6854 | 0.0372 | 64.58 |
| 4  | 82313570  | rs11933194 | C | T | 3 | 0.002506 | 0.08092 | 0.8009 | 0.8041 | 0.0975 | 57.05 |
| 4  | 132482173 | rs1911882  | C | T | 4 | 0.004552 | 0.08112 | 1.3414 | 1.3868 | 0.0509 | 61.42 |
| 8  | 73179080  | rs2701437  | A | G | 4 | 0.01276  | 0.0812  | 0.8982 | 0.8602 | 0.0207 | 69.27 |
| 4  | 136726319 | rs7667350  | A | G | 4 | 0.00802  | 0.0813  | 0.893  | 0.8958 | 0.1458 | 44.27 |
| 4  | 74453060  | rs6844516  | A | T | 4 | 0.009836 | 0.08142 | 1.3024 | 1.4174 | 0.0223 | 68.75 |
| 4  | 74496772  | rs16849331 | G | T | 4 | 0.008304 | 0.08178 | 0.7671 | 0.7084 | 0.0213 | 69.08 |
| 8  | 10722996  | rs10109550 | G | T | 4 | 0.01706  | 0.0819  | 1.1024 | 1.1456 | 0.0416 | 63.52 |
| 2  | 6432676   | rs11899039 | A | T | 4 | 0.01287  | 0.08194 | 1.1713 | 1.2286 | 0.0384 | 64.29 |
| 6  | 29817819  | rs2517938  | C | T | 4 | 0.001556 | 0.08217 | 1.1586 | 1.13   | 0.143  | 44.73 |
| 8  | 73175792  | rs2701438  | G | T | 4 | 0.01254  | 0.08229 | 1.1137 | 1.1622 | 0.0205 | 69.33 |
| 15 | 36725309  | rs10438404 | G | T | 4 | 0.006016 | 0.08263 | 0.9077 | 0.9164 | 0.1729 | 39.81 |
| 21 | 33331127  | rs12233311 | A | G | 4 | 0.005049 | 0.08265 | 1.1028 | 1.1322 | 0.0194 | 69.7  |
| 20 | 8465451   | rs2423366  | A | G | 3 | 0.004998 | 0.0831  | 0.8679 | 0.7983 | 0.0151 | 76.15 |
| 2  | 26379923  | rs6753473  | G | T | 4 | 0.004746 | 0.08347 | 1.3859 | 1.456  | 0.0349 | 65.17 |
| 8  | 10723495  | rs6989846  | C | T | 4 | 0.01793  | 0.08375 | 1.1016 | 1.1453 | 0.0402 | 63.85 |
| 13 | 98301752  | rs9582269  | A | G | 4 | 0.03253  | 0.084   | 1.107  | 1.2121 | 0.0031 | 78.38 |
| 20 | 8464695   | rs2423364  | C | T | 3 | 0.003887 | 0.08431 | 0.8643 | 0.7982 | 0.0149 | 76.24 |
| 2  | 40172384  | rs12151560 | C | T | 3 | 0.003658 | 0.08456 | 1.148  | 1.3297 | 0.0004 | 87.4  |
| 19 | 38737515  | rs1864132  | A | G | 4 | 0.005565 | 0.0848  | 0.86   | 0.8658 | 0.1345 | 46.15 |
| 4  | 136739233 | rs2089184  | C | G | 4 | 0.009507 | 0.08508 | 0.8953 | 0.8982 | 0.1519 | 43.27 |
| 4  | 74455492  | rs7675336  | A | G | 4 | 0.01136  | 0.08563 | 0.7718 | 0.7085 | 0.022  | 68.83 |
| 4  | 74460813  | rs16849293 | A | G | 4 | 0.01143  | 0.08591 | 0.77   | 0.7068 | 0.0221 | 68.8  |

|    |           |            |   |   |   |           |         |        |        |        |       |
|----|-----------|------------|---|---|---|-----------|---------|--------|--------|--------|-------|
| 16 | 16026525  | rs246240   | A | G | 4 | 0.01266   | 0.08592 | 1.1287 | 1.2036 | 0.0115 | 72.85 |
| 8  | 73172159  | rs2587578  | A | G | 4 | 0.01515   | 0.08627 | 1.1103 | 1.1591 | 0.0212 | 69.12 |
| 11 | 32223969  | rs11031664 | C | T | 4 | 0.002053  | 0.08681 | 1.1302 | 1.1101 | 0.1267 | 47.45 |
| 4  | 136730370 | rs2035291  | C | G | 4 | 0.008943  | 0.08797 | 1.1181 | 1.1152 | 0.1383 | 45.51 |
| 6  | 14489463  | rs7748589  | A | G | 4 | 0.006548  | 0.08824 | 0.9089 | 0.9034 | 0.0821 | 55.22 |
| 3  | 71412562  | rs4613421  | C | G | 4 | 0.009749  | 0.08876 | 0.9072 | 0.915  | 0.1959 | 36.05 |
| 12 | 13259589  | rs2069086  | G | T | 4 | 0.008183  | 0.08924 | 0.8279 | 0.7763 | 0.0249 | 67.95 |
| 21 | 40082808  | rs2837220  | C | T | 4 | 0.000517  | 0.0894  | 1.1313 | 1.131  | 0.021  | 69.16 |
| 6  | 121574075 | rs9490138  | C | T | 4 | 0.001623  | 0.08973 | 1.1568 | 1.1224 | 0.1571 | 42.41 |
| 4  | 74514655  | rs16849372 | A | T | 4 | 0.01063   | 0.08975 | 1.2925 | 1.4002 | 0.0209 | 69.19 |
| 16 | 47659380  | rs2967303  | C | G | 4 | 0.006425  | 0.09005 | 0.9067 | 0.9009 | 0.0737 | 56.79 |
| 13 | 28458146  | rs1570309  | A | G | 4 | 0.006237  | 0.09031 | 0.8572 | 0.8491 | 0.0645 | 58.6  |
| 10 | 24662335  | rs10741051 | A | G | 4 | 0.02911   | 0.09067 | 1.1015 | 1.1848 | 0.0057 | 76.09 |
| 11 | 10824525  | rs771377   | C | G | 4 | 0.00226   | 0.09131 | 1.228  | 1.2082 | 0.0882 | 54.12 |
| 4  | 132440597 | rs10018289 | A | G | 4 | 0.003037  | 0.0914  | 1.3528 | 1.4353 | 0.0164 | 70.79 |
| 2  | 40169977  | rs12614752 | G | T | 3 | 0.004786  | 0.09164 | 1.1472 | 1.3207 | 0.0004 | 87.2  |
| 8  | 73172073  | rs2701444  | C | T | 4 | 0.01848   | 0.09172 | 0.9035 | 0.8648 | 0.021  | 69.18 |
| 10 | 124167869 | rs17103522 | C | T | 4 | 0.004929  | 0.0918  | 0.8562 | 0.8729 | 0.1606 | 41.83 |
| 4  | 136723916 | rs1842259  | A | G | 4 | 0.01073   | 0.09209 | 0.8974 | 0.8998 | 0.147  | 44.07 |
| 8  | 10715391  | rs1544980  | C | T | 4 | 0.01954   | 0.0922  | 0.902  | 0.8558 | 0.0196 | 69.65 |
| 4  | 136736073 | rs13142176 | C | T | 4 | 0.009838  | 0.09221 | 1.1165 | 1.1143 | 0.1349 | 46.08 |
| 11 | 10826485  | rs2687489  | A | G | 4 | 0.002342  | 0.09249 | 1.2271 | 1.2075 | 0.088  | 54.15 |
| 7  | 122420709 | rs1525489  | A | G | 4 | 0.01741   | 0.09253 | 0.8281 | 0.7825 | 0.0362 | 64.84 |
| 13 | 98301534  | rs2026026  | C | T | 4 | 0.04111   | 0.09265 | 1.1014 | 1.2093 | 0.0024 | 79.2  |
| 8  | 10713033  | rs2052963  | G | T | 4 | 0.01741   | 0.0929  | 1.102  | 1.1421 | 0.0379 | 64.41 |
| 13 | 21757616  | rs2038712  | C | T | 4 | 0.006017  | 0.09362 | 0.9052 | 0.9006 | 0.0722 | 57.08 |
| 4  | 136737904 | rs6816076  | A | G | 4 | 0.009808  | 0.09368 | 0.8956 | 0.8976 | 0.133  | 46.39 |
| 8  | 10720537  | rs7840785  | C | T | 4 | 0.01934   | 0.09404 | 1.0968 | 1.1408 | 0.03   | 66.48 |
| 11 | 10832929  | rs2232919  | C | T | 4 | 0.002316  | 0.09426 | 0.8154 | 0.8265 | 0.0793 | 55.74 |
| 1  | 74129798  | rs2789708  | A | T | 4 | 0.02184   | 0.09436 | 1.0842 | 1.1605 | 0.0018 | 80.05 |
| 4  | 136724400 | rs1479789  | A | G | 4 | 0.009228  | 0.09447 | 1.1175 | 1.1137 | 0.1339 | 46.25 |
| 8  | 73171999  | rs2701445  | G | T | 4 | 0.02041   | 0.09472 | 1.1051 | 1.1549 | 0.0209 | 69.21 |
| 1  | 74129950  | rs2792075  | C | T | 4 | 0.02226   | 0.09492 | 0.9226 | 0.8618 | 0.0018 | 80.09 |
| 4  | 135192004 | rs12642075 | A | G | 4 | 0.02713   | 0.09506 | 0.9128 | 0.8722 | 0.0328 | 65.72 |
| 4  | 136734593 | rs11944567 | C | T | 4 | 0.01017   | 0.09521 | 1.116  | 1.1134 | 0.1342 | 46.19 |
| 2  | 133199169 | rs4953986  | C | T | 4 | 0.0009475 | 0.09534 | 1.1326 | 1.1163 | 0.0639 | 58.7  |
| 8  | 73197756  | rs4614034  | C | T | 4 | 0.0254    | 0.09544 | 0.9075 | 0.8686 | 0.0265 | 67.46 |



|    |           |            |   |   |   |           |         |        |        |        |       |
|----|-----------|------------|---|---|---|-----------|---------|--------|--------|--------|-------|
| 8  | 26555006  | rs4733048  | C | T | 4 | 0.01816   | 0.09558 | 0.8731 | 0.8261 | 0.0286 | 66.87 |
| 14 | 31527742  | rs10132087 | C | T | 4 | 0.007038  | 0.09568 | 1.1298 | 1.1274 | 0.105  | 51.14 |
| 3  | 41535096  | rs1495693  | C | T | 4 | 0.01223   | 0.09574 | 1.1978 | 1.2445 | 0.0393 | 64.06 |
| 2  | 209868043 | rs6752290  | C | T | 4 | 0.007986  | 0.09581 | 1.1198 | 1.1098 | 0.1559 | 42.61 |
| 16 | 26198350  | rs12925611 | C | T | 4 | 0.0006838 | 0.09587 | 0.866  | 0.8918 | 0.1001 | 51.99 |
| 3  | 124836431 | rs1254401  | C | G | 4 | 0.002463  | 0.09604 | 1.2492 | 1.2494 | 0.0421 | 63.41 |
| 21 | 32322781  | rs9977744  | C | T | 4 | 0.005581  | 0.09627 | 0.8709 | 0.8813 | 0.1287 | 47.11 |
| 11 | 10829758  | rs7925687  | C | T | 4 | 0.002486  | 0.0963  | 0.8165 | 0.8292 | 0.0844 | 54.8  |
| 4  | 136728703 | rs13101421 | C | T | 4 | 0.009722  | 0.0968  | 0.8955 | 0.8978 | 0.1292 | 47.02 |
| 8  | 10708670  | rs6995541  | A | G | 4 | 0.0151    | 0.09686 | 1.1037 | 1.1394 | 0.0352 | 65.1  |
| 3  | 41535386  | rs1795312  | A | T | 4 | 0.01298   | 0.09698 | 1.1959 | 1.2428 | 0.04   | 63.89 |
| 3  | 41542696  | rs1565960  | A | G | 4 | 0.01319   | 0.09713 | 1.1947 | 1.2425 | 0.0395 | 64.02 |
| 8  | 73193049  | rs4467976  | A | G | 4 | 0.02786   | 0.09717 | 1.0995 | 1.1494 | 0.0271 | 67.28 |
| 8  | 73191306  | rs4738207  | A | G | 4 | 0.02398   | 0.09719 | 0.9078 | 0.8692 | 0.0243 | 68.12 |
| 8  | 73185849  | rs16938030 | C | T | 4 | 0.02226   | 0.09726 | 1.1029 | 1.1514 | 0.0229 | 68.55 |
| 8  | 12770433  | rs13272401 | G | T | 3 | 0.0002785 | 0.09754 | 1.8427 | 1.647  | 0.1014 | 56.32 |
| 16 | 16022393  | rs246214   | C | T | 4 | 0.01675   | 0.09768 | 1.1238 | 1.1982 | 0.0106 | 73.25 |
| 4  | 136734221 | rs11099350 | A | G | 4 | 0.01044   | 0.09803 | 1.1155 | 1.113  | 0.1313 | 46.67 |
| 4  | 135194503 | rs1565911  | G | T | 4 | 0.02904   | 0.09821 | 1.0943 | 1.1465 | 0.0304 | 66.37 |
| 4  | 136730572 | rs2035292  | A | G | 4 | 0.0102    | 0.0985  | 1.1159 | 1.1133 | 0.129  | 47.05 |
| 9  | 76896764  | rs2376398  | C | T | 4 | 0.0734    | 0.09864 | 0.9359 | 0.8792 | 0.0163 | 70.84 |
| 3  | 41534618  | rs1631168  | A | C | 4 | 0.01368   | 0.09889 | 1.1943 | 1.2415 | 0.0398 | 63.96 |
| 12 | 123620722 | rs6488934  | A | T | 3 | 0.002045  | 0.09897 | 1.2701 | 1.2732 | 0.056  | 65.31 |
| 3  | 124833978 | rs1254397  | C | T | 4 | 0.002622  | 0.09925 | 0.8016 | 0.8011 | 0.0405 | 63.78 |
| 4  | 135184692 | rs10021844 | A | G | 4 | 0.03178   | 0.09927 | 0.9152 | 0.8757 | 0.0373 | 64.56 |
| 10 | 124149040 | rs4565845  | A | C | 3 | 0.003347  | 0.0993  | 1.1826 | 1.1658 | 0.1109 | 54.53 |
| 2  | 133207895 | rs4953987  | A | G | 4 | 0.001022  | 0.09946 | 0.8844 | 0.897  | 0.0617 | 59.16 |
| 8  | 73191692  | rs4738208  | C | T | 4 | 0.02802   | 0.09982 | 1.0994 | 1.1487 | 0.0262 | 67.55 |
| 8  | 73191724  | rs4738209  | A | C | 4 | 0.02824   | 0.09983 | 1.0993 | 1.1483 | 0.0268 | 67.37 |
| 4  | 136740519 | rs11737477 | G | T | 4 | 0.01097   | 0.1001  | 0.8972 | 0.9001 | 0.1364 | 45.83 |
| 18 | 48343516  | rs1550567  | A | G | 4 | 0.006729  | 0.1002  | 0.8722 | 0.8708 | 0.091  | 53.61 |
| 4  | 132454388 | rs9995748  | C | T | 4 | 0.003742  | 0.1003  | 1.3415 | 1.4043 | 0.0216 | 68.97 |
| 2  | 133209220 | rs984521   | A | G | 4 | 0.0007894 | 0.1004  | 0.8811 | 0.8943 | 0.0519 | 61.2  |
| 16 | 24389161  | rs3096190  | A | C | 4 | 0.03478   | 0.1005  | 1.0792 | 1.1247 | 0.0234 | 68.41 |
| 1  | 74232437  | rs4650237  | G | T | 4 | 0.02328   | 0.1006  | 0.9197 | 0.864  | 0.0033 | 78.11 |
| 13 | 98297352  | rs7986477  | A | G | 4 | 0.05163   | 0.1007  | 0.9116 | 0.8333 | 0.0032 | 78.25 |
| 2  | 40174693  | rs917977   | C | T | 3 | 0.007471  | 0.1009  | 1.1357 | 1.3261 | 0.0002 | 88.3  |

|    |           |            |   |   |   |           |        |        |        |        |       |
|----|-----------|------------|---|---|---|-----------|--------|--------|--------|--------|-------|
| 4  | 136732580 | rs2016168  | C | T | 4 | 0.01073   | 0.1009 | 1.1151 | 1.1126 | 0.1285 | 47.15 |
| 4  | 136733600 | rs11723306 | C | T | 4 | 0.01073   | 0.1009 | 1.1151 | 1.1126 | 0.1285 | 47.15 |
| 6  | 99026958  | rs1494770  | C | T | 4 | 0.0006625 | 0.101  | 0.7169 | 0.7566 | 0.0641 | 58.66 |
| 4  | 136724155 | rs1479787  | C | T | 4 | 0.00996   | 0.1012 | 0.8958 | 0.899  | 0.1289 | 47.08 |
| 4  | 136732373 | rs1038152  | A | T | 4 | 0.01056   | 0.1012 | 0.8966 | 0.8987 | 0.1269 | 47.41 |
| 1  | 212361177 | rs1660375  | A | G | 4 | 0.002202  | 0.1013 | 1.3781 | 1.2943 | 0.1606 | 41.84 |
| 7  | 84576431  | rs1029563  | G | T | 4 | 0.04518   | 0.1014 | 1.0842 | 1.1448 | 0.0206 | 69.31 |
| 10 | 114466456 | rs11196072 | C | T | 4 | 0.004632  | 0.1016 | 1.2093 | 1.1915 | 0.1139 | 49.62 |
| 4  | 136723951 | rs2127459  | G | T | 4 | 0.01004   | 0.1018 | 0.8959 | 0.8992 | 0.1289 | 47.07 |
| 1  | 91987216  | rs284170   | C | T | 4 | 0.008224  | 0.1019 | 1.1458 | 1.1648 | 0.0564 | 60.25 |
| 2  | 133195447 | rs6736839  | C | T | 4 | 0.002053  | 0.102  | 1.1148 | 1.1181 | 0.0327 | 65.74 |
| 4  | 136731046 | rs7694930  | A | C | 4 | 0.01065   | 0.102  | 0.8967 | 0.8989 | 0.1267 | 47.45 |
| 1  | 58233385  | rs11207145 | A | G | 3 | 0.002621  | 0.1022 | 2.0312 | 2.0041 | 0.0655 | 63.3  |
| 4  | 136723423 | rs2054506  | C | G | 4 | 0.01011   | 0.1023 | 0.896  | 0.8993 | 0.129  | 47.06 |
| 3  | 41611668  | rs17059208 | C | G | 4 | 0.007932  | 0.1024 | 0.796  | 0.7563 | 0.0216 | 68.97 |
| 4  | 74412384  | rs6446921  | A | G | 4 | 0.02847   | 0.1025 | 1.2351 | 1.3612 | 0.0255 | 67.75 |
| 11 | 34519515  | rs836123   | C | T | 4 | 0.002853  | 0.1027 | 0.8164 | 0.829  | 0.0837 | 54.94 |
| 11 | 32223435  | rs1033627  | A | G | 4 | 0.001123  | 0.1035 | 0.8852 | 0.9017 | 0.0767 | 56.22 |
| 4  | 136724188 | rs1479788  | A | T | 4 | 0.01015   | 0.1036 | 0.8961 | 0.8992 | 0.126  | 47.56 |
| 2  | 98792270  | rs1356424  | C | T | 4 | 0.004806  | 0.1037 | 0.8983 | 0.8988 | 0.0693 | 57.64 |
| 4  | 136733042 | rs11935087 | A | G | 4 | 0.01084   | 0.1041 | 0.8969 | 0.899  | 0.1241 | 47.88 |
| 13 | 98294942  | rs9582266  | A | G | 4 | 0.05857   | 0.1041 | 0.9144 | 0.8382 | 0.0041 | 77.38 |
| 4  | 136731472 | rs7654065  | A | C | 4 | 0.01076   | 0.1042 | 1.115  | 1.1125 | 0.1234 | 47.99 |
| 4  | 136722856 | rs11935664 | C | T | 4 | 0.01029   | 0.1043 | 0.8963 | 0.8995 | 0.1264 | 47.49 |
| 4  | 136723371 | rs2054505  | C | T | 4 | 0.01029   | 0.1043 | 0.8963 | 0.8995 | 0.1264 | 47.49 |
| 11 | 32207041  | rs2418582  | A | G | 4 | 0.001605  | 0.1043 | 1.1255 | 1.1045 | 0.0952 | 52.85 |
| 1  | 97696087  | rs7531138  | A | T | 4 | 0.07793   | 0.1044 | 0.9379 | 0.8645 | 0.0027 | 78.77 |
| 21 | 32336948  | rs9982468  | C | T | 4 | 0.005404  | 0.1044 | 1.1488 | 1.1358 | 0.1114 | 50.04 |
| 4  | 135194459 | rs1565912  | A | G | 4 | 0.03522   | 0.1046 | 0.9168 | 0.8748 | 0.0311 | 66.17 |
| 1  | 74227364  | rs11210390 | C | T | 4 | 0.02417   | 0.1047 | 1.0867 | 1.156  | 0.0031 | 78.33 |
| 4  | 135195163 | rs2421069  | C | T | 4 | 0.03192   | 0.1047 | 1.0928 | 1.144  | 0.0298 | 66.53 |
| 4  | 136722879 | rs11940405 | G | T | 4 | 0.01026   | 0.1047 | 1.1158 | 1.1118 | 0.1258 | 47.59 |
| 5  | 153749486 | rs13154706 | C | T | 4 | 0.04849   | 0.105  | 0.921  | 0.8618 | 0.0102 | 73.45 |
| 6  | 40752262  | rs11962303 | A | C | 4 | 0.006777  | 0.1051 | 1.1217 | 1.1438 | 0.031  | 66.2  |
| 7  | 20862587  | rs17143423 | A | G | 4 | 0.007407  | 0.1059 | 0.8807 | 0.8822 | 0.0939 | 53.09 |
| 4  | 132446415 | rs12641562 | A | C | 4 | 0.003393  | 0.1066 | 0.7427 | 0.7093 | 0.0166 | 70.7  |
| 7  | 84598360  | rs2159575  | C | T | 4 | 0.05053   | 0.1066 | 0.9225 | 0.8729 | 0.0195 | 69.67 |

|    |           |            |   |   |   |          |        |        |        |        |       |
|----|-----------|------------|---|---|---|----------|--------|--------|--------|--------|-------|
| 4  | 136722837 | rs11935719 | A | G | 4 | 0.01049  | 0.1071 | 1.1154 | 1.1115 | 0.1232 | 48.03 |
| 10 | 24661175  | rs7897007  | A | G | 4 | 0.0368   | 0.1073 | 0.9109 | 0.8493 | 0.0064 | 75.66 |
| 10 | 80764708  | rs16937080 | A | T | 4 | 0.05602  | 0.1073 | 0.9278 | 0.8737 | 0.0155 | 71.14 |
| 18 | 69425930  | rs2051413  | A | G | 4 | 0.0471   | 0.1075 | 1.0738 | 1.1268 | 0.021  | 69.17 |
| 11 | 32209862  | rs1998003  | A | C | 4 | 0.00158  | 0.1076 | 1.1254 | 1.1039 | 0.0915 | 53.52 |
| 7  | 84575619  | rs10486848 | A | G | 4 | 0.0363   | 0.1081 | 1.0962 | 1.1676 | 0.0097 | 73.69 |
| 4  | 132453787 | rs12641624 | C | T | 4 | 0.004482 | 0.1082 | 0.7492 | 0.7151 | 0.0201 | 69.48 |
| 4  | 132449623 | rs12650292 | A | G | 4 | 0.003724 | 0.1084 | 1.3426 | 1.4066 | 0.0169 | 70.62 |
| 4  | 135194549 | rs1565910  | A | G | 4 | 0.03746  | 0.1085 | 1.0892 | 1.1409 | 0.0308 | 66.24 |
| 18 | 69430600  | rs1943869  | C | G | 4 | 0.04907  | 0.1087 | 1.0731 | 1.1252 | 0.0225 | 68.68 |
| 11 | 32207093  | rs2418583  | C | T | 4 | 0.001682 | 0.1088 | 1.1247 | 1.1034 | 0.0919 | 53.44 |
| 9  | 104678314 | rs1826415  | C | T | 4 | 0.0427   | 0.109  | 0.9149 | 0.8763 | 0.0362 | 64.84 |
| 7  | 146312527 | rs10808041 | A | T | 4 | 0.001297 | 0.1094 | 0.8227 | 0.8588 | 0.1197 | 48.63 |
| 7  | 84577029  | rs17561679 | C | T | 4 | 0.04814  | 0.1096 | 1.083  | 1.1386 | 0.0238 | 68.27 |
| 10 | 6552587   | rs11597105 | A | G | 4 | 0.07448  | 0.1096 | 0.9127 | 0.7937 | 0.0005 | 83.07 |
| 7  | 107414230 | rs2021886  | A | G | 3 | 0.007393 | 0.1097 | 1.1057 | 1.1003 | 0.1212 | 52.61 |
| 18 | 69429890  | rs4892117  | C | T | 4 | 0.05067  | 0.1098 | 0.9323 | 0.8892 | 0.0229 | 68.55 |
| 4  | 132449990 | rs12641430 | C | T | 4 | 0.004393 | 0.1099 | 1.3357 | 1.3995 | 0.0188 | 69.92 |
| 1  | 212356390 | rs1660381  | C | T | 3 | 0.001183 | 0.1101 | 1.4069 | 1.3283 | 0.1063 | 55.39 |
| 11 | 32207354  | rs926968   | C | T | 4 | 0.001526 | 0.1102 | 1.1259 | 1.104  | 0.0873 | 54.26 |
| 1  | 74227289  | rs11210389 | A | C | 4 | 0.02949  | 0.1103 | 1.083  | 1.1527 | 0.0031 | 78.39 |
| 11 | 32207798  | rs926967   | A | G | 4 | 0.001586 | 0.1116 | 0.8886 | 0.9061 | 0.0875 | 54.23 |
| 21 | 40067833  | rs16998436 | C | T | 4 | 0.005305 | 0.1118 | 1.1901 | 1.2181 | 0.0252 | 67.86 |
| 7  | 84577791  | rs1029564  | G | T | 4 | 0.05032  | 0.112  | 1.0822 | 1.1382 | 0.0231 | 68.48 |
| 2  | 128358837 | rs10183605 | C | G | 4 | 0.002387 | 0.1121 | 0.8935 | 0.8977 | 0.0469 | 62.3  |
| 2  | 209855352 | rs4673461  | A | G | 4 | 0.00911  | 0.1121 | 0.8953 | 0.9029 | 0.1372 | 45.7  |
| 11 | 32208659  | rs2418584  | C | T | 4 | 0.001664 | 0.1122 | 1.1248 | 1.1023 | 0.0924 | 53.36 |
| 4  | 132453477 | rs12647579 | A | T | 4 | 0.00489  | 0.1124 | 0.7513 | 0.7167 | 0.0191 | 69.8  |
| 4  | 149309538 | rs6535584  | C | T | 4 | 0.01224  | 0.1124 | 1.0916 | 1.1176 | 0.0258 | 67.67 |
| 7  | 84532070  | rs7800255  | A | T | 4 | 0.0103   | 0.1129 | 1.1469 | 1.193  | 0.0168 | 70.66 |
| 18 | 69451956  | rs11662228 | C | T | 4 | 0.05017  | 0.1129 | 1.0706 | 1.1257 | 0.0146 | 71.49 |
| 3  | 41530567  | rs2017454  | A | G | 4 | 0.02321  | 0.113  | 1.1763 | 1.2279 | 0.0419 | 63.46 |
| 6  | 41385833  | rs9357353  | C | T | 4 | 0.00136  | 0.1132 | 1.1213 | 1.0982 | 0.0925 | 53.33 |
| 11 | 10781116  | rs10743150 | A | G | 4 | 0.001917 | 0.1133 | 1.231  | 1.2066 | 0.0625 | 58.98 |
| 1  | 97673140  | rs12129397 | A | T | 4 | 0.08645  | 0.1134 | 1.0621 | 1.1512 | 0.002  | 79.78 |
| 4  | 132450305 | rs11946051 | G | T | 4 | 0.005034 | 0.1138 | 0.752  | 0.7173 | 0.0189 | 69.88 |
| 6  | 14489412  | rs926924   | C | T | 4 | 0.0094   | 0.1143 | 1.0945 | 1.1091 | 0.0416 | 63.53 |

|    |           |            |   |   |   |           |        |        |        |        |       |
|----|-----------|------------|---|---|---|-----------|--------|--------|--------|--------|-------|
| 3  | 41526055  | rs1256396  | A | T | 4 | 0.02244   | 0.1146 | 1.1767 | 1.2267 | 0.0412 | 63.61 |
| 11 | 32211971  | rs7124928  | C | T | 4 | 0.001529  | 0.1146 | 0.8882 | 0.9059 | 0.0822 | 55.2  |
| 10 | 30438125  | rs12220246 | C | T | 4 | 0.0007857 | 0.1147 | 1.1358 | 1.1    | 0.1192 | 48.71 |
| 1  | 97675378  | rs11165873 | A | T | 4 | 0.08883   | 0.1149 | 1.0616 | 1.1507 | 0.0019 | 79.81 |
| 3  | 41524937  | rs9831248  | C | G | 4 | 0.02247   | 0.115  | 1.1766 | 1.2267 | 0.0409 | 63.7  |
| 21 | 40068571  | rs16998444 | A | G | 4 | 0.006016  | 0.1151 | 1.187  | 1.2153 | 0.0257 | 67.68 |
| 2  | 133201434 | rs11692408 | A | G | 4 | 0.001263  | 0.1153 | 0.8863 | 0.8991 | 0.0531 | 60.94 |
| 6  | 25256945  | rs12663706 | C | G | 4 | 0.003686  | 0.1153 | 1.1414 | 1.1235 | 0.0984 | 52.29 |
| 14 | 31529811  | rs10132140 | A | G | 4 | 0.008069  | 0.1158 | 0.8868 | 0.8905 | 0.0939 | 53.08 |
| 12 | 2777987   | rs1981655  | A | T | 4 | 0.004163  | 0.116  | 0.7731 | 0.8081 | 0.1537 | 42.97 |
| 3  | 41519427  | rs4258937  | A | G | 4 | 0.02343   | 0.1162 | 0.8504 | 0.8156 | 0.0414 | 63.57 |
| 1  | 97668350  | rs11165870 | C | T | 4 | 0.1006    | 0.1163 | 0.9439 | 0.867  | 0.0014 | 80.63 |
| 4  | 135193417 | rs1390026  | G | T | 4 | 0.04777   | 0.1165 | 0.9216 | 0.8789 | 0.0318 | 65.98 |
| 11 | 32212187  | rs10742273 | C | G | 4 | 0.001594  | 0.1165 | 1.1254 | 1.1036 | 0.082  | 55.24 |
| 1  | 97699427  | rs7550959  | A | G | 4 | 0.0935    | 0.1167 | 0.9422 | 0.8698 | 0.0023 | 79.37 |
| 10 | 114461555 | rs11196070 | C | G | 4 | 0.005055  | 0.1169 | 0.8285 | 0.8418 | 0.1007 | 51.89 |
| 3  | 60196556  | rs10510834 | A | G | 4 | 0.1213    | 0.117  | 1.076  | 1.1872 | 0.0074 | 75.02 |
| 11 | 32212217  | rs10742274 | C | T | 4 | 0.001623  | 0.1171 | 0.8887 | 0.9063 | 0.0822 | 55.21 |
| 3  | 60197075  | rs13082004 | C | T | 4 | 0.1256    | 0.1176 | 0.9306 | 0.8421 | 0.0067 | 75.44 |
| 1  | 97693544  | rs12354219 | C | T | 4 | 0.09758   | 0.1177 | 0.9434 | 0.8687 | 0.0017 | 80.19 |
| 21 | 32329234  | rs9974134  | A | C | 4 | 0.006386  | 0.1177 | 0.8728 | 0.883  | 0.1038 | 51.35 |
| 4  | 28926641  | rs987157   | A | G | 4 | 0.06876   | 0.1182 | 1.1064 | 1.1937 | 0.0167 | 70.67 |
| 11 | 10779614  | rs7103202  | A | G | 4 | 0.002068  | 0.1184 | 0.8142 | 0.8299 | 0.0588 | 59.75 |
| 1  | 97690894  | rs3897854  | C | T | 4 | 0.0949    | 0.1187 | 1.0605 | 1.1497 | 0.0019 | 79.92 |
| 6  | 40749271  | rs4714357  | A | G | 4 | 0.01025   | 0.1188 | 0.8961 | 0.8785 | 0.032  | 65.93 |
| 2  | 6855044   | rs10200467 | C | T | 4 | 0.2119    | 0.1189 | 1.0513 | 1.1747 | 0.002  | 79.75 |
| 2  | 229840402 | rs10185903 | C | T | 4 | 0.003574  | 0.1191 | 1.1556 | 1.1214 | 0.1558 | 42.62 |
| 1  | 74116329  | rs967881   | A | G | 4 | 0.05199   | 0.1192 | 0.9305 | 0.8871 | 0.0172 | 70.5  |
| 11 | 32212512  | rs12795402 | C | T | 4 | 0.001559  | 0.1192 | 1.1257 | 1.1035 | 0.0792 | 55.76 |
| 7  | 91252060  | rs1208998  | C | T | 4 | 0.001419  | 0.1193 | 0.7862 | 0.8187 | 0.07   | 57.52 |
| 1  | 74233585  | rs6663201  | C | T | 4 | 0.03839   | 0.1199 | 1.0801 | 1.1656 | 0.0008 | 81.97 |
| 7  | 84580693  | rs17561700 | G | T | 4 | 0.03885   | 0.1199 | 1.0954 | 1.1594 | 0.0115 | 72.82 |
| 1  | 74138234  | rs1340434  | C | T | 4 | 0.02395   | 0.1202 | 1.085  | 1.1607 | 0.0008 | 82.15 |
| 8  | 27723712  | rs1052873  | C | T | 4 | 0.004011  | 0.1204 | 1.1359 | 1.1128 | 0.1211 | 48.38 |
| 1  | 74233724  | rs6660710  | A | G | 4 | 0.03898   | 0.1206 | 0.926  | 0.8579 | 0.0008 | 82.05 |
| 1  | 97677368  | rs4949953  | C | T | 4 | 0.1012    | 0.1206 | 0.9441 | 0.8699 | 0.0017 | 80.17 |
| 3  | 60195347  | rs7628950  | A | T | 4 | 0.1314    | 0.1207 | 0.9311 | 0.8439 | 0.0075 | 74.95 |

|    |           |            |   |   |   |          |        |        |        |        |       |
|----|-----------|------------|---|---|---|----------|--------|--------|--------|--------|-------|
| 1  | 74149450  | rs7544252  | C | G | 4 | 0.024    | 0.1209 | 1.0849 | 1.1609 | 0.0007 | 82.26 |
| 1  | 74150383  | rs12062996 | C | T | 4 | 0.024    | 0.1209 | 1.0849 | 1.1609 | 0.0007 | 82.26 |
| 20 | 8455713   | rs6055881  | C | T | 4 | 0.05949  | 0.1209 | 1.0709 | 1.141  | 0.0052 | 76.51 |
| 6  | 40749486  | rs16893894 | C | T | 4 | 0.01069  | 0.1211 | 1.1153 | 1.1375 | 0.0318 | 65.98 |
| 1  | 74111118  | rs6672527  | C | T | 4 | 0.05454  | 0.1212 | 0.9306 | 0.8862 | 0.0165 | 70.76 |
| 1  | 74112532  | rs11210361 | C | T | 4 | 0.05461  | 0.1214 | 1.0738 | 1.1265 | 0.0173 | 70.46 |
| 6  | 25265596  | rs1900554  | C | T | 4 | 0.004718 | 0.1214 | 0.882  | 0.9002 | 0.1366 | 45.8  |
| 1  | 74117298  | rs17579506 | C | T | 4 | 0.05538  | 0.1216 | 1.0731 | 1.1262 | 0.0166 | 70.71 |
| 1  | 74117107  | rs17520168 | C | T | 4 | 0.05559  | 0.1217 | 1.073  | 1.126  | 0.0169 | 70.61 |
| 1  | 74151900  | rs7550937  | A | G | 4 | 0.02455  | 0.1217 | 1.0846 | 1.1608 | 0.0007 | 82.32 |
| 1  | 74152537  | rs1768649  | A | G | 4 | 0.02455  | 0.1217 | 1.0846 | 1.1608 | 0.0007 | 82.32 |
| 1  | 74153059  | rs11210368 | A | G | 4 | 0.02455  | 0.1217 | 1.0846 | 1.1608 | 0.0007 | 82.32 |
| 4  | 136740556 | rs11737486 | A | G | 4 | 0.006824 | 0.1217 | 1.1621 | 1.1504 | 0.0779 | 56.01 |
| 6  | 40749374  | rs4714358  | A | C | 4 | 0.01096  | 0.1221 | 1.1149 | 1.1372 | 0.0317 | 66    |
| 21 | 40081547  | rs11088495 | C | T | 4 | 0.001244 | 0.1222 | 0.8917 | 0.8918 | 0.0166 | 70.7  |
| 1  | 74159865  | rs2733260  | C | T | 4 | 0.02496  | 0.1223 | 0.9222 | 0.8616 | 0.0007 | 82.33 |
| 12 | 82308633  | rs7136505  | A | G | 3 | 0.004254 | 0.1223 | 0.7624 | 0.736  | 0.0232 | 73.44 |
| 14 | 37935967  | rs1168555  | A | G | 4 | 0.0676   | 0.1225 | 1.0663 | 1.1114 | 0.034  | 65.4  |
| 1  | 74165700  | rs7533599  | A | G | 4 | 0.02501  | 0.1226 | 1.0843 | 1.1609 | 0.0007 | 82.42 |
| 1  | 74168149  | rs12081389 | A | T | 4 | 0.02501  | 0.1226 | 1.0843 | 1.1609 | 0.0007 | 82.42 |
| 6  | 28377642  | rs1997660  | A | G | 4 | 0.04545  | 0.1226 | 1.0814 | 1.1319 | 0.023  | 68.53 |
| 18 | 69453896  | rs11876675 | A | G | 4 | 0.06164  | 0.1231 | 0.9359 | 0.89   | 0.0148 | 71.4  |
| 3  | 60194354  | rs4679648  | C | T | 4 | 0.1314   | 0.1232 | 0.9316 | 0.8535 | 0.0135 | 71.93 |
| 15 | 81227450  | rs12592976 | C | T | 4 | 0.01657  | 0.1232 | 0.8749 | 0.8392 | 0.0283 | 66.95 |
| 11 | 32214418  | rs1155855  | A | G | 4 | 0.001358 | 0.1233 | 0.887  | 0.9057 | 0.072  | 57.12 |
| 11 | 32214070  | rs1155856  | A | G | 4 | 0.001382 | 0.1234 | 1.1272 | 1.1039 | 0.0725 | 57.03 |
| 18 | 13790956  | rs9949908  | G | T | 4 | 0.01088  | 0.1234 | 0.8633 | 0.8019 | 0.0017 | 80.18 |
| 18 | 13793024  | rs948271   | C | T | 4 | 0.01094  | 0.1234 | 1.1584 | 1.2473 | 0.0017 | 80.16 |
| 2  | 6853536   | rs4668508  | A | G | 4 | 0.2157   | 0.1241 | 0.9501 | 0.8498 | 0.002  | 79.72 |
| 14 | 37935713  | rs1168554  | A | G | 4 | 0.06959  | 0.1241 | 1.0658 | 1.1109 | 0.0341 | 65.37 |
| 6  | 83339411  | rs16885899 | A | G | 2 | 0.00222  | 0.1244 | 1.9161 | 1.7841 | 0.0879 | 65.66 |
| 8  | 10739369  | rs7010709  | C | T | 4 | 0.04741  | 0.1244 | 0.9172 | 0.8607 | 0.0103 | 73.42 |
| 11 | 80994506  | rs7949287  | A | G | 4 | 0.1198   | 0.1244 | 0.9476 | 0.8775 | 0.0028 | 78.68 |
| 2  | 40178533  | rs13032715 | C | T | 3 | 0.01709  | 0.1245 | 1.1252 | 1.3042 | 0.0002 | 88.04 |
| 1  | 74122434  | rs11210363 | A | G | 4 | 0.05916  | 0.1248 | 1.0725 | 1.1263 | 0.0163 | 70.84 |
| 8  | 10739944  | rs6990589  | A | G | 4 | 0.0467   | 0.1248 | 0.9165 | 0.8603 | 0.0104 | 73.35 |
| 8  | 10741808  | rs11990167 | C | T | 4 | 0.04801  | 0.1249 | 1.09   | 1.163  | 0.0095 | 73.83 |

|    |           |            |   |   |   |           |        |        |        |        |       |
|----|-----------|------------|---|---|---|-----------|--------|--------|--------|--------|-------|
| 10 | 30429219  | rs3847404  | C | T | 4 | 0.000328  | 0.1252 | 0.8749 | 0.9079 | 0.0903 | 53.73 |
| 1  | 74235010  | rs2343196  | C | T | 4 | 0.04221   | 0.1256 | 1.0787 | 1.1629 | 0.0009 | 81.85 |
| 1  | 212358932 | rs1795036  | A | G | 4 | 0.001961  | 0.1257 | 1.3805 | 1.2852 | 0.1351 | 46.03 |
| 4  | 72355439  | rs1377287  | A | G | 4 | 0.0827    | 0.1257 | 0.9062 | 0.8181 | 0.0038 | 77.69 |
| 6  | 28403018  | rs853683   | A | G | 4 | 0.04964   | 0.1257 | 1.0798 | 1.1293 | 0.0252 | 67.86 |
| 3  | 63500043  | rs4616634  | A | G | 4 | 8.62E-05  | 0.126  | 1.1855 | 1.1345 | 0.0365 | 64.77 |
| 3  | 41517346  | rs1691983  | A | G | 4 | 0.0303    | 0.1261 | 0.8569 | 0.8207 | 0.0422 | 63.37 |
| 1  | 212356865 | rs1660378  | C | T | 4 | 0.001624  | 0.1264 | 1.3647 | 1.2709 | 0.1313 | 46.68 |
| 6  | 28399219  | rs707907   | A | G | 4 | 0.0506    | 0.1267 | 1.0795 | 1.1291 | 0.0249 | 67.93 |
| 11 | 107990612 | rs7125479  | A | C | 4 | 0.05127   | 0.1267 | 0.9341 | 0.9032 | 0.037  | 64.63 |
| 3  | 41516991  | rs2643977  | C | T | 4 | 0.0297    | 0.1271 | 1.1677 | 1.2193 | 0.0404 | 63.8  |
| 11 | 107987483 | rs2852205  | A | G | 4 | 0.05356   | 0.1277 | 1.0699 | 1.107  | 0.0371 | 64.62 |
| 20 | 57284330  | rs6100397  | G | T | 4 | 0.0006886 | 0.1277 | 1.3981 | 1.3821 | 0.0109 | 73.09 |
| 2  | 229839689 | rs6754229  | C | T | 4 | 0.004091  | 0.1279 | 1.1532 | 1.1189 | 0.1535 | 42.99 |
| 4  | 136739022 | rs2102279  | C | T | 4 | 0.007456  | 0.1279 | 1.1596 | 1.1474 | 0.0765 | 56.26 |
| 11 | 32214720  | rs12287573 | C | T | 4 | 0.00145   | 0.1284 | 1.1266 | 1.1032 | 0.0697 | 57.56 |
| 3  | 41516845  | rs2643976  | A | G | 4 | 0.031     | 0.1286 | 1.1669 | 1.2183 | 0.0412 | 63.61 |
| 6  | 25260653  | rs6941417  | A | G | 4 | 0.007927  | 0.1288 | 0.8831 | 0.8942 | 0.1195 | 48.66 |
| 6  | 40745631  | rs6901833  | A | G | 4 | 0.002475  | 0.1288 | 1.1416 | 1.1476 | 0.0194 | 69.69 |
| 11 | 10721194  | rs924111   | A | G | 4 | 0.005926  | 0.1288 | 1.1027 | 1.0839 | 0.1441 | 44.55 |
| 11 | 32215762  | rs10767925 | A | G | 4 | 0.001362  | 0.1288 | 1.1274 | 1.1035 | 0.068  | 57.9  |
| 8  | 10744211  | rs1469557  | C | T | 4 | 0.05384   | 0.1289 | 1.0877 | 1.1662 | 0.007  | 75.25 |
| 14 | 37936185  | rs1186370  | A | G | 4 | 0.07616   | 0.1291 | 1.0643 | 1.1105 | 0.0317 | 66.01 |
| 11 | 32220627  | rs6484557  | A | C | 4 | 0.001211  | 0.1292 | 0.8859 | 0.9052 | 0.0633 | 58.84 |
| 1  | 74224911  | rs9662322  | G | T | 4 | 0.03892   | 0.1294 | 0.9256 | 0.8581 | 0.0006 | 82.71 |
| 3  | 41561312  | rs1629284  | C | G | 4 | 0.01903   | 0.1297 | 1.1847 | 1.2316 | 0.0295 | 66.6  |
| 2  | 236090677 | rs2316435  | A | T | 4 | 0.03637   | 0.1301 | 0.9087 | 0.8494 | 0.0033 | 78.12 |
| 2  | 209659240 | rs1439736  | G | T | 4 | 0.001546  | 0.1302 | 0.8536 | 0.8798 | 0.0786 | 55.87 |
| 1  | 74185240  | rs10493528 | A | T | 4 | 0.02383   | 0.1306 | 1.0857 | 1.1591 | 0.0006 | 82.67 |
| 2  | 236075691 | rs7599284  | A | G | 4 | 0.03428   | 0.1307 | 0.9067 | 0.8459 | 0.0026 | 78.94 |
| 11 | 80986103  | rs1945649  | C | T | 4 | 0.1325    | 0.1307 | 1.0534 | 1.1366 | 0.0028 | 78.65 |
| 1  | 212357674 | rs1440619  | A | G | 4 | 0.001927  | 0.1308 | 1.3692 | 1.2776 | 0.1257 | 47.61 |
| 5  | 153738544 | rs7728507  | C | T | 4 | 0.08266   | 0.131  | 1.0721 | 1.1583 | 0.0036 | 77.89 |
| 17 | 45486194  | rs9895410  | C | T | 4 | 0.07892   | 0.131  | 1.0981 | 1.1924 | 0.0079 | 74.68 |
| 2  | 236094249 | rs4663604  | A | G | 4 | 0.03713   | 0.1312 | 1.1001 | 1.1765 | 0.0034 | 78.06 |
| 3  | 41516460  | rs11919885 | C | T | 4 | 0.03353   | 0.1314 | 0.8589 | 0.8232 | 0.0436 | 63.04 |
| 11 | 107991327 | rs7934388  | A | T | 4 | 0.05591   | 0.1314 | 1.0692 | 1.1062 | 0.0361 | 64.86 |

|    |           |            |   |   |   |           |        |        |        |        |       |
|----|-----------|------------|---|---|---|-----------|--------|--------|--------|--------|-------|
| 3  | 15005549  | rs9839660  | A | T | 4 | 0.04199   | 0.1315 | 1.1752 | 1.2852 | 0.0117 | 72.73 |
| 2  | 236094532 | rs10460276 | C | T | 4 | 0.03775   | 0.1316 | 0.9093 | 0.8502 | 0.0034 | 78.04 |
| 2  | 236095585 | rs6731720  | G | T | 4 | 0.03213   | 0.1317 | 1.1046 | 1.1763 | 0.0039 | 77.53 |
| 3  | 63499920  | rs1505598  | C | G | 4 | 0.0001213 | 0.1319 | 1.1812 | 1.1316 | 0.0379 | 64.41 |
| 18 | 37303085  | rs2703175  | A | G | 4 | 0.03422   | 0.1319 | 0.8802 | 0.7928 | 0.0023 | 79.28 |
| 6  | 25262375  | rs11752102 | A | G | 4 | 0.007811  | 0.132  | 1.1326 | 1.1176 | 0.1182 | 48.88 |
| 11 | 81001119  | rs2097171  | C | T | 4 | 0.1228    | 0.1321 | 1.0547 | 1.1313 | 0.0042 | 77.26 |
| 5  | 153737245 | rs1422665  | C | T | 4 | 0.08645   | 0.1323 | 1.0711 | 1.1568 | 0.0038 | 77.69 |
| 2  | 236087152 | rs938675   | C | T | 4 | 0.0368    | 0.1326 | 0.9089 | 0.8494 | 0.003  | 78.49 |
| 1  | 74161472  | rs12076161 | A | C | 4 | 0.02844   | 0.1329 | 0.924  | 0.8658 | 0.0008 | 82.21 |
| 8  | 10720187  | rs17152571 | A | G | 4 | 0.08882   | 0.133  | 0.9118 | 0.8198 | 0.0046 | 76.94 |
| 2  | 236091352 | rs4663602  | A | G | 4 | 0.03838   | 0.1332 | 1.0994 | 1.1767 | 0.0031 | 78.33 |
| 3  | 124837883 | rs820460   | C | T | 4 | 0.004051  | 0.1333 | 1.2352 | 1.2378 | 0.0263 | 67.52 |
| 1  | 74191995  | rs7544238  | A | C | 4 | 0.02584   | 0.1337 | 1.084  | 1.1586 | 0.0005 | 82.95 |
| 3  | 63490926  | rs6777474  | A | G | 4 | 7.28E-05  | 0.1337 | 1.1904 | 1.1371 | 0.0298 | 66.51 |
| 1  | 74161523  | rs12077198 | A | G | 4 | 0.02919   | 0.1338 | 0.9243 | 0.866  | 0.0007 | 82.23 |
| 18 | 48360097  | rs12961437 | G | T | 4 | 0.006429  | 0.1338 | 0.8731 | 0.8672 | 0.0393 | 64.07 |
| 2  | 159755255 | rs12617786 | A | G | 4 | 0.01303   | 0.1339 | 1.4395 | 1.4253 | 0.0828 | 55.1  |
| 4  | 154534381 | rs10517571 | A | C | 4 | 0.1615    | 0.134  | 1.0506 | 1.1372 | 0.003  | 78.43 |
| 4  | 154559969 | rs3852108  | A | C | 4 | 0.1585    | 0.134  | 0.9511 | 0.879  | 0.0031 | 78.32 |
| 11 | 10804775  | rs4243917  | C | T | 4 | 0.001385  | 0.134  | 0.8097 | 0.8299 | 0.0399 | 63.93 |
| 11 | 32220968  | rs2418587  | C | T | 4 | 0.001313  | 0.134  | 0.8867 | 0.906  | 0.0618 | 59.14 |
| 4  | 29199244  | rs1441670  | A | G | 4 | 0.1868    | 0.1341 | 1.0475 | 1.1509 | 0.0008 | 82.2  |
| 1  | 74191025  | rs1417259  | G | T | 4 | 0.02596   | 0.1343 | 1.0839 | 1.1584 | 0.0005 | 82.96 |
| 3  | 15059018  | rs9825022  | C | T | 4 | 0.04796   | 0.1343 | 0.8557 | 0.7854 | 0.0148 | 71.4  |
| 11 | 32216421  | rs1884382  | A | G | 4 | 0.001193  | 0.1343 | 1.1289 | 1.1038 | 0.0606 | 59.38 |
| 1  | 212357165 | rs1795037  | A | G | 4 | 0.001828  | 0.1344 | 1.3611 | 1.2663 | 0.1295 | 46.98 |
| 1  | 74195971  | rs11210377 | G | T | 4 | 0.03005   | 0.1345 | 0.9251 | 0.8643 | 0.0006 | 82.88 |
| 3  | 41515056  | rs12639280 | C | T | 4 | 0.03586   | 0.1345 | 1.1621 | 1.2128 | 0.0437 | 63.03 |
| 8  | 10769957  | rs10903331 | C | G | 4 | 0.04483   | 0.1346 | 0.9073 | 0.8279 | 0.0015 | 80.55 |
| 8  | 120078754 | rs4876434  | C | T | 4 | 0.00804   | 0.1346 | 1.2269 | 1.2324 | 0.0515 | 61.29 |
| 1  | 74196206  | rs12116914 | G | T | 4 | 0.03027   | 0.1348 | 1.0809 | 1.157  | 0.0005 | 82.89 |
| 3  | 15058788  | rs9820676  | C | G | 4 | 0.04883   | 0.1348 | 0.8562 | 0.7861 | 0.0152 | 71.25 |
| 13 | 26340889  | rs9553915  | A | G | 4 | 0.003893  | 0.1349 | 0.8563 | 0.8821 | 0.1251 | 47.71 |
| 21 | 40093555  | rs16998556 | G | T | 4 | 0.01043   | 0.1349 | 0.8522 | 0.8278 | 0.0216 | 68.98 |
| 1  | 205534725 | rs6686201  | A | G | 4 | 0.1497    | 0.1356 | 0.9506 | 0.8824 | 0.0038 | 77.67 |
| 5  | 153740522 | rs17116042 | C | T | 4 | 0.08897   | 0.1357 | 0.9341 | 0.8648 | 0.0034 | 78.03 |

|    |           |            |   |   |   |           |        |        |        |        |       |
|----|-----------|------------|---|---|---|-----------|--------|--------|--------|--------|-------|
| 1  | 212355741 | rs1660382  | A | G | 4 | 0.001589  | 0.1358 | 1.3808 | 1.2757 | 0.1257 | 47.61 |
| 12 | 13256321  | rs2291060  | A | G | 4 | 0.01666   | 0.1361 | 1.1868 | 1.2748 | 0.0106 | 73.24 |
| 4  | 72354592  | rs7436806  | A | G | 4 | 0.08416   | 0.1362 | 1.1118 | 1.2387 | 0.0029 | 78.56 |
| 8  | 10723261  | rs17152584 | A | G | 4 | 0.09952   | 0.1362 | 0.9145 | 0.8207 | 0.0045 | 77.07 |
| 3  | 102220701 | rs13091963 | A | G | 4 | 0.06209   | 0.1363 | 1.0749 | 1.1452 | 0.0039 | 77.53 |
| 8  | 10741204  | rs11250082 | C | T | 4 | 0.05754   | 0.1364 | 1.0863 | 1.1582 | 0.0093 | 73.93 |
| 3  | 63490780  | rs6766087  | C | T | 4 | 7.74E-05  | 0.1365 | 0.8405 | 0.8798 | 0.0291 | 66.72 |
| 1  | 74170715  | rs12082647 | A | C | 4 | 0.02849   | 0.1366 | 0.924  | 0.8644 | 0.0005 | 83.01 |
| 1  | 74202690  | rs12064998 | A | G | 4 | 0.03184   | 0.1366 | 0.9259 | 0.8647 | 0.0005 | 82.95 |
| 11 | 32216841  | rs7109202  | C | T | 4 | 0.001243  | 0.1366 | 1.1284 | 1.1034 | 0.0599 | 59.51 |
| 1  | 74202532  | rs12064944 | A | G | 4 | 0.03269   | 0.1375 | 0.9262 | 0.8649 | 0.0005 | 82.97 |
| 3  | 124845546 | rs820470   | C | T | 4 | 0.003046  | 0.1376 | 1.2538 | 1.2344 | 0.0343 | 65.33 |
| 2  | 57624516  | rs13410921 | A | C | 3 | 7.59E-05  | 0.1377 | 0.5133 | 0.5791 | 0.035  | 70.17 |
| 6  | 28390627  | rs853693   | A | G | 4 | 0.06293   | 0.1378 | 0.9302 | 0.8888 | 0.0241 | 68.18 |
| 3  | 102221017 | rs2713775  | A | T | 4 | 0.06458   | 0.138  | 0.931  | 0.8737 | 0.0039 | 77.53 |
| 9  | 70346115  | rs10120859 | C | T | 4 | 0.01145   | 0.138  | 0.8799 | 0.8889 | 0.1191 | 48.72 |
| 2  | 57625311  | rs9309297  | C | G | 3 | 7.81E-05  | 0.1382 | 1.9459 | 1.7253 | 0.0351 | 70.15 |
| 1  | 74215111  | rs12138557 | A | C | 4 | 0.03273   | 0.1383 | 1.0796 | 1.1552 | 0.0006 | 82.82 |
| 5  | 153745624 | rs6870010  | C | T | 4 | 0.1001    | 0.1383 | 0.9367 | 0.8699 | 0.005  | 76.63 |
| 1  | 91987439  | rs284172   | A | T | 4 | 0.01276   | 0.1385 | 0.8802 | 0.8647 | 0.0381 | 64.35 |
| 2  | 57618472  | rs13389335 | A | T | 3 | 7.60E-05  | 0.1385 | 0.509  | 0.5759 | 0.0344 | 70.31 |
| 1  | 74158268  | rs10493526 | C | T | 4 | 0.03372   | 0.1387 | 1.0797 | 1.1527 | 0.0007 | 82.24 |
| 4  | 136728656 | rs13129036 | C | T | 3 | 0.008213  | 0.1388 | 1.1243 | 1.1186 | 0.0826 | 59.9  |
| 8  | 27642120  | rs13282289 | A | G | 4 | 0.004474  | 0.139  | 1.1289 | 1.1022 | 0.1254 | 47.66 |
| 3  | 106415848 | rs10933810 | C | T | 4 | 0.004956  | 0.1394 | 1.1315 | 1.1117 | 0.0968 | 52.58 |
| 7  | 12650865  | rs2691810  | C | T | 4 | 0.08902   | 0.1396 | 1.0945 | 1.1851 | 0.0092 | 73.94 |
| 3  | 63503954  | rs11130944 | C | T | 4 | 0.0001525 | 0.1397 | 0.8449 | 0.8824 | 0.0349 | 65.18 |
| 3  | 124847003 | rs820472   | C | T | 4 | 0.003244  | 0.1397 | 1.2505 | 1.2344 | 0.0318 | 65.99 |
| 2  | 57616717  | rs13392012 | C | T | 3 | 7.63E-05  | 0.1399 | 1.9928 | 1.7528 | 0.0334 | 70.57 |
| 7  | 24845137  | rs1541363  | C | T | 4 | 0.01262   | 0.14   | 1.1554 | 1.2318 | 0.0046 | 76.95 |
| 2  | 57626427  | rs9309298  | A | G | 3 | 8.29E-05  | 0.1401 | 0.5151 | 0.5806 | 0.0347 | 70.24 |
| 12 | 89968187  | rs7959834  | C | T | 4 | 0.01573   | 0.1401 | 0.8393 | 0.7931 | 0.0138 | 71.8  |
| 12 | 89968856  | rs7973791  | A | C | 4 | 0.01576   | 0.1402 | 1.1914 | 1.2608 | 0.0139 | 71.8  |
| 1  | 74194799  | rs1361463  | A | T | 4 | 0.03534   | 0.1403 | 1.0785 | 1.1554 | 0.0005 | 83.05 |
| 1  | 205524041 | rs2217406  | A | T | 4 | 0.1625    | 0.1405 | 0.952  | 0.8838 | 0.0038 | 77.65 |
| 2  | 64133110  | rs10171434 | C | T | 4 | 0.00459   | 0.1405 | 0.8263 | 0.8562 | 0.1264 | 47.5  |
| 1  | 205549789 | rs7525530  | A | G | 4 | 0.1624    | 0.1407 | 0.952  | 0.8825 | 0.0033 | 78.18 |



|    |           |            |   |   |   |           |        |        |        |        |       |
|----|-----------|------------|---|---|---|-----------|--------|--------|--------|--------|-------|
| 3  | 63487802  | rs11928896 | A | G | 4 | 7.46E-05  | 0.1407 | 1.1918 | 1.1431 | 0.0195 | 69.68 |
| 13 | 43927733  | rs11619041 | A | G | 4 | 0.01936   | 0.1408 | 1.0876 | 1.117  | 0.0171 | 70.54 |
| 13 | 44106744  | rs9567450  | C | T | 4 | 0.03785   | 0.1408 | 1.0784 | 1.1201 | 0.0156 | 71.09 |
| 4  | 95487295  | rs1991316  | G | T | 4 | 0.006318  | 0.1409 | 1.1036 | 1.1149 | 0.019  | 69.84 |
| 2  | 236080078 | rs1865951  | A | G | 4 | 0.04341   | 0.141  | 0.9112 | 0.8475 | 0.002  | 79.75 |
| 1  | 61296851  | rs12402756 | C | T | 4 | 0.01464   | 0.1415 | 1.157  | 1.1796 | 0.037  | 64.64 |
| 6  | 116166045 | rs9384957  | C | T | 4 | 0.002786  | 0.1415 | 1.1558 | 1.1566 | 0.0159 | 70.99 |
| 18 | 48306360  | rs12964400 | A | G | 4 | 0.006962  | 0.1415 | 1.1438 | 1.1494 | 0.0406 | 63.76 |
| 1  | 205480867 | rs891373   | C | T | 4 | 0.1646    | 0.1416 | 1.0511 | 1.135  | 0.0034 | 78.02 |
| 3  | 63504654  | rs1027764  | G | T | 4 | 0.0001639 | 0.1417 | 0.8438 | 0.8813 | 0.0338 | 65.45 |
| 21 | 40067939  | rs2837204  | C | T | 4 | 0.007639  | 0.1417 | 1.1741 | 1.2014 | 0.0176 | 70.36 |
| 11 | 32217307  | rs2207820  | A | C | 4 | 0.001305  | 0.1418 | 1.1278 | 1.1027 | 0.0575 | 60.01 |
| 4  | 29184029  | rs1348188  | C | T | 4 | 0.2112    | 0.1419 | 0.9566 | 0.8694 | 0.0007 | 82.51 |
| 12 | 89954104  | rs12228056 | C | T | 4 | 0.01779   | 0.142  | 1.187  | 1.2674 | 0.0105 | 73.3  |
| 2  | 98798495  | rs1568213  | A | T | 4 | 0.006052  | 0.1424 | 1.1092 | 1.1081 | 0.0433 | 63.13 |
| 1  | 88270563  | rs4265406  | A | G | 4 | 0.2904    | 0.1426 | 1.0389 | 1.1505 | 0.001  | 81.6  |
| 1  | 74175413  | rs10890093 | G | T | 4 | 0.03608   | 0.1428 | 0.9271 | 0.8665 | 0.0005 | 82.89 |
| 1  | 74175476  | rs10890094 | A | G | 4 | 0.03628   | 0.143  | 0.9272 | 0.8665 | 0.0005 | 82.91 |
| 6  | 99016428  | rs9491625  | A | G | 4 | 0.0008617 | 0.143  | 0.7262 | 0.7818 | 0.055  | 60.54 |
| 13 | 21757893  | rs9510084  | A | C | 4 | 0.01053   | 0.143  | 1.0963 | 1.0973 | 0.0626 | 58.97 |
| 6  | 30228616  | rs9468693  | C | T | 3 | 0.007737  | 0.1432 | 1.2242 | 1.2337 | 0.048  | 67.07 |
| 2  | 57617362  | rs6746753  | C | G | 3 | 8.13E-05  | 0.1434 | 1.9701 | 1.7412 | 0.0328 | 70.75 |
| 11 | 32216036  | rs1884379  | G | T | 4 | 0.001575  | 0.1436 | 0.8885 | 0.9081 | 0.0608 | 59.33 |
| 4  | 95484845  | rs7438414  | C | T | 4 | 0.00685   | 0.1438 | 0.907  | 0.8976 | 0.0188 | 69.91 |
| 3  | 63499833  | rs1505599  | A | C | 4 | 0.0002113 | 0.1439 | 1.1753 | 1.1272 | 0.0396 | 63.99 |
| 4  | 34724145  | rs968774   | A | G | 4 | 0.0123    | 0.1439 | 1.4149 | 1.3419 | 0.1589 | 42.12 |
| 11 | 10783496  | rs7932171  | C | T | 4 | 0.002801  | 0.144  | 1.2225 | 1.1978 | 0.0489 | 61.85 |
| 11 | 32218732  | rs10835876 | A | T | 4 | 0.001383  | 0.1443 | 0.8873 | 0.9074 | 0.0573 | 60.06 |
| 11 | 117191666 | rs4597100  | A | C | 4 | 0.1059    | 0.1445 | 0.9427 | 0.8954 | 0.0203 | 69.41 |
| 1  | 88272291  | rs12133500 | C | G | 4 | 0.3002    | 0.1446 | 0.9633 | 0.8695 | 0.001  | 81.67 |
| 4  | 95481688  | rs11727030 | A | G | 4 | 0.007153  | 0.1448 | 1.1019 | 1.1138 | 0.019  | 69.86 |
| 1  | 74208096  | rs11210383 | A | C | 4 | 0.03813   | 0.1449 | 1.0778 | 1.1541 | 0.0005 | 82.99 |
| 1  | 212356402 | rs1660380  | A | G | 4 | 0.00202   | 0.1451 | 0.7374 | 0.7932 | 0.1238 | 47.93 |
| 5  | 158812974 | rs4921230  | C | T | 4 | 0.155     | 0.1451 | 1.0605 | 1.1429 | 0.0115 | 72.85 |
| 3  | 15120491  | rs13318013 | A | G | 4 | 0.04363   | 0.1456 | 1.1743 | 1.279  | 0.0098 | 73.67 |
| 3  | 63485004  | rs6775133  | A | G | 4 | 9.44E-05  | 0.1456 | 1.1889 | 1.1424 | 0.0184 | 70.05 |
| 6  | 99007342  | rs9482736  | C | T | 4 | 0.001074  | 0.1456 | 1.373  | 1.2706 | 0.0665 | 58.2  |

|    |           |            |   |   |   |           |        |        |        |        |       |
|----|-----------|------------|---|---|---|-----------|--------|--------|--------|--------|-------|
| 18 | 41955585  | rs12607480 | A | G | 4 | 0.01575   | 0.1457 | 0.8813 | 0.8512 | 0.0182 | 70.11 |
| 3  | 63485884  | rs17068905 | C | T | 4 | 8.89E-05  | 0.1459 | 1.1897 | 1.1418 | 0.0189 | 69.89 |
| 18 | 41948674  | rs8083916  | A | C | 4 | 0.0161    | 0.1459 | 0.8817 | 0.8534 | 0.0208 | 69.25 |
| 3  | 15097982  | rs13326820 | A | G | 4 | 0.04939   | 0.146  | 0.857  | 0.7804 | 0.0081 | 74.6  |
| 21 | 40087119  | rs16998519 | G | T | 4 | 0.01203   | 0.146  | 1.1705 | 1.206  | 0.0187 | 69.97 |
| 1  | 88273491  | rs12567534 | A | G | 4 | 0.3086    | 0.1462 | 1.0375 | 1.1499 | 0.0009 | 81.8  |
| 3  | 15125801  | rs9867224  | A | G | 4 | 0.04392   | 0.1462 | 0.8517 | 0.7835 | 0.0105 | 73.3  |
| 3  | 63488445  | rs6770081  | A | G | 4 | 8.90E-05  | 0.1462 | 1.1896 | 1.1413 | 0.0194 | 69.7  |
| 3  | 63488625  | rs11921529 | A | G | 4 | 8.61E-05  | 0.1462 | 0.8403 | 0.8761 | 0.0192 | 69.78 |
| 3  | 63489025  | rs9848074  | C | G | 4 | 8.67E-05  | 0.1463 | 1.19   | 1.1414 | 0.0193 | 69.76 |
| 3  | 63489216  | rs7641936  | C | T | 4 | 8.67E-05  | 0.1463 | 1.19   | 1.1414 | 0.0193 | 69.76 |
| 10 | 22887793  | rs7097972  | C | T | 4 | 0.002212  | 0.1466 | 0.8948 | 0.9209 | 0.1194 | 48.67 |
| 11 | 32219434  | rs1115704  | C | T | 4 | 0.001415  | 0.1466 | 1.1268 | 1.1017 | 0.0562 | 60.28 |
| 15 | 36725830  | rs3923022  | A | G | 3 | 0.006271  | 0.1468 | 1.1051 | 1.0948 | 0.086  | 59.23 |
| 6  | 99015010  | rs12213284 | G | T | 4 | 0.0009078 | 0.1469 | 0.725  | 0.7829 | 0.0563 | 60.26 |
| 3  | 63495515  | rs985367   | G | T | 4 | 0.0002403 | 0.147  | 1.1736 | 1.126  | 0.04   | 63.9  |
| 2  | 38224980  | rs10188379 | C | G | 4 | 0.003951  | 0.1471 | 1.1302 | 1.1093 | 0.0826 | 55.13 |
| 4  | 95479708  | rs724260   | A | G | 4 | 0.007604  | 0.1473 | 1.1011 | 1.1131 | 0.0188 | 69.91 |
| 3  | 124823568 | rs820455   | A | G | 4 | 0.003726  | 0.1479 | 0.8028 | 0.8106 | 0.027  | 67.31 |
| 3  | 63487061  | rs7617487  | G | T | 4 | 8.67E-05  | 0.1481 | 0.8404 | 0.8762 | 0.0185 | 70.01 |
| 6  | 116106532 | rs9320545  | C | T | 4 | 0.01101   | 0.1482 | 0.8973 | 0.8831 | 0.0204 | 69.36 |
| 10 | 22886741  | rs4748813  | C | T | 4 | 0.002462  | 0.1482 | 1.1139 | 1.0839 | 0.1202 | 48.54 |
| 4  | 34724210  | rs968773   | A | C | 4 | 0.01311   | 0.1483 | 1.3997 | 1.3365 | 0.1498 | 43.62 |
| 11 | 123073614 | rs12419599 | G | T | 4 | 0.06993   | 0.1484 | 0.8659 | 0.8055 | 0.0305 | 66.33 |
| 3  | 63494767  | rs1394901  | C | T | 4 | 0.0002577 | 0.1491 | 0.8527 | 0.8887 | 0.04   | 63.89 |
| 3  | 63495077  | rs4392412  | G | T | 4 | 0.0002577 | 0.1491 | 0.8527 | 0.8887 | 0.04   | 63.89 |
| 1  | 205553098 | rs11120691 | G | T | 4 | 0.1839    | 0.1492 | 1.0479 | 1.1316 | 0.0028 | 78.64 |
| 3  | 63494733  | rs1394902  | C | T | 4 | 0.0002616 | 0.1492 | 1.1725 | 1.1251 | 0.0402 | 63.85 |
| 3  | 63495157  | rs985370   | A | G | 4 | 0.0002616 | 0.1492 | 1.1725 | 1.1251 | 0.0402 | 63.85 |
| 3  | 63495430  | rs985368   | C | T | 4 | 0.0002616 | 0.1492 | 1.1725 | 1.1251 | 0.0402 | 63.85 |
| 1  | 74143228  | rs4650235  | A | G | 4 | 0.03612   | 0.1493 | 1.0799 | 1.1253 | 0.0077 | 74.78 |
| 9  | 70346769  | rs10746875 | A | T | 4 | 0.01036   | 0.1498 | 0.8779 | 0.8902 | 0.111  | 50.1  |
| 1  | 4560412   | rs589176   | A | G | 4 | 0.01065   | 0.15   | 0.9106 | 0.9125 | 0.0667 | 58.15 |
| 6  | 102373779 | rs9498719  | C | T | 4 | 0.08047   | 0.15   | 0.8909 | 0.7992 | 0.0029 | 78.57 |
| 2  | 57629006  | rs9309299  | C | G | 3 | 0.0001039 | 0.1501 | 1.9234 | 1.7106 | 0.032  | 70.95 |
| 4  | 136712040 | rs11946618 | C | G | 4 | 0.01629   | 0.1503 | 1.1063 | 1.1007 | 0.106  | 50.97 |
| 1  | 212358567 | rs12568811 | A | G | 4 | 0.00245   | 0.1504 | 0.7297 | 0.7873 | 0.1236 | 47.97 |

|    |           |            |   |   |   |           |        |        |        |        |       |
|----|-----------|------------|---|---|---|-----------|--------|--------|--------|--------|-------|
| 7  | 12646159  | rs849766   | G | T | 4 | 0.1212    | 0.1504 | 1.0882 | 1.1755 | 0.0155 | 71.12 |
| 6  | 102368610 | rs12333317 | A | G | 4 | 0.07549   | 0.1505 | 1.1259 | 1.2558 | 0.0025 | 79.09 |
| 1  | 199828298 | rs625436   | A | G | 4 | 0.1111    | 0.1509 | 0.8913 | 0.7599 | 0.0005 | 83.14 |
| 2  | 236072455 | rs2316431  | C | T | 4 | 0.04664   | 0.151  | 0.9096 | 0.8492 | 0.0026 | 78.9  |
| 1  | 61295468  | rs12565220 | C | T | 4 | 0.01475   | 0.1516 | 0.8649 | 0.8497 | 0.0333 | 65.6  |
| 1  | 225256592 | rs12409428 | C | T | 4 | 0.03663   | 0.1516 | 1.0744 | 1.116  | 0.0093 | 73.92 |
| 13 | 21757961  | rs9510085  | G | T | 4 | 0.01159   | 0.1517 | 0.9132 | 0.9135 | 0.0651 | 58.46 |
| 1  | 225249982 | rs10495273 | G | T | 4 | 0.0374    | 0.1518 | 1.0741 | 1.116  | 0.0092 | 73.96 |
| 6  | 99020505  | rs9401880  | C | G | 4 | 0.0009572 | 0.1518 | 1.3744 | 1.2755 | 0.0525 | 61.06 |
| 6  | 99021401  | rs9491633  | A | C | 4 | 0.00101   | 0.1519 | 0.7279 | 0.7837 | 0.0528 | 61    |
| 6  | 99021767  | rs1908399  | A | G | 4 | 0.0009912 | 0.1523 | 1.3745 | 1.2762 | 0.0522 | 61.14 |
| 1  | 225244354 | rs1186     | A | T | 4 | 0.03739   | 0.1528 | 0.931  | 0.8958 | 0.0087 | 74.23 |
| 1  | 225254994 | rs7541033  | A | C | 4 | 0.03771   | 0.1529 | 1.074  | 1.116  | 0.009  | 74.09 |
| 6  | 99021290  | rs9491632  | A | T | 4 | 0.001067  | 0.1529 | 0.7291 | 0.7846 | 0.0533 | 60.9  |
| 16 | 47661065  | rs7205094  | G | T | 4 | 0.008578  | 0.1529 | 0.9074 | 0.9081 | 0.0726 | 57    |
| 3  | 101331030 | rs17315194 | G | T | 4 | 0.09536   | 0.1531 | 1.092  | 1.1744 | 0.0117 | 72.73 |
| 1  | 225256856 | rs6684821  | A | G | 4 | 0.03764   | 0.1534 | 1.074  | 1.1157 | 0.009  | 74.05 |
| 2  | 57629283  | rs10166539 | A | G | 3 | 0.0001145 | 0.1534 | 1.9158 | 1.7055 | 0.0315 | 71.09 |
| 1  | 225268494 | rs17600669 | A | G | 4 | 0.03325   | 0.1535 | 0.9294 | 0.9007 | 0.0147 | 71.44 |
| 21 | 40092123  | rs16998550 | C | T | 4 | 0.01519   | 0.1535 | 1.1644 | 1.2009 | 0.0194 | 69.71 |
| 3  | 63483291  | rs13067087 | A | T | 4 | 9.86E-05  | 0.1537 | 1.19   | 1.143  | 0.016  | 70.93 |
| 6  | 99020082  | rs9388491  | A | C | 4 | 0.0009789 | 0.1538 | 1.3735 | 1.2744 | 0.0519 | 61.19 |
| 6  | 99021203  | rs9482746  | C | T | 4 | 0.0009758 | 0.154  | 0.728  | 0.7847 | 0.0518 | 61.22 |
| 6  | 99021192  | rs9491631  | C | T | 4 | 0.0009707 | 0.1541 | 1.3739 | 1.2745 | 0.0516 | 61.26 |
| 2  | 57629406  | rs9309301  | A | G | 3 | 0.0001174 | 0.1542 | 1.9138 | 1.7042 | 0.0313 | 71.13 |
| 1  | 225249748 | rs1343743  | C | T | 4 | 0.03879   | 0.1548 | 0.9315 | 0.8964 | 0.0088 | 74.19 |
| 1  | 225250697 | rs10916075 | A | G | 4 | 0.03895   | 0.1549 | 1.0735 | 1.1155 | 0.0089 | 74.15 |
| 1  | 212358976 | rs1795035  | C | T | 4 | 0.002614  | 0.1553 | 0.7297 | 0.7874 | 0.1234 | 48    |
| 7  | 12644156  | rs849764   | C | G | 4 | 0.1326    | 0.1553 | 0.921  | 0.8513 | 0.0145 | 71.54 |
| 1  | 225245585 | rs1045287  | C | T | 4 | 0.03948   | 0.1554 | 1.0733 | 1.1155 | 0.0087 | 74.22 |
| 3  | 63505317  | rs1505595  | C | T | 4 | 0.0002693 | 0.1554 | 1.1787 | 1.1304 | 0.034  | 65.4  |
| 5  | 85551089  | rs11959230 | C | T | 3 | 0.004479  | 0.1554 | 0.5665 | 0.5526 | 0.0344 | 70.33 |
| 16 | 24384824  | rs2560922  | G | T | 4 | 0.05849   | 0.1554 | 0.9304 | 0.8973 | 0.0223 | 68.74 |
| 3  | 63482702  | rs2202492  | C | T | 4 | 0.0001117 | 0.1556 | 0.8405 | 0.8747 | 0.0161 | 70.92 |
| 1  | 212359212 | rs1795034  | C | T | 4 | 0.002693  | 0.1557 | 1.3691 | 1.2693 | 0.1242 | 47.86 |
| 1  | 225245677 | rs1045285  | A | G | 3 | 0.03581   | 0.1558 | 1.0775 | 1.1413 | 0.0033 | 82.46 |
| 3  | 63482584  | rs2221476  | A | G | 4 | 0.0001077 | 0.1558 | 1.1904 | 1.144  | 0.0156 | 71.09 |

|    |           |            |   |   |   |           |        |        |        |        |       |
|----|-----------|------------|---|---|---|-----------|--------|--------|--------|--------|-------|
| 14 | 37930129  | rs1184875  | A | C | 4 | 0.09031   | 0.156  | 0.9419 | 0.9056 | 0.0295 | 66.6  |
| 20 | 8459004   | rs2143205  | C | T | 3 | 0.02025   | 0.1561 | 1.1168 | 1.202  | 0.008  | 79.31 |
| 1  | 225254519 | rs11587443 | C | T | 4 | 0.03983   | 0.1562 | 1.0732 | 1.1151 | 0.0089 | 74.16 |
| 2  | 57630160  | rs10496069 | A | T | 3 | 0.0001274 | 0.1565 | 0.5243 | 0.5883 | 0.0311 | 71.18 |
| 11 | 123073674 | rs4406833  | A | T | 4 | 0.07714   | 0.1566 | 0.8686 | 0.8054 | 0.0261 | 67.58 |
| 1  | 74134374  | rs10890086 | A | C | 4 | 0.0459    | 0.1567 | 0.931  | 0.8934 | 0.0083 | 74.44 |
| 1  | 225244750 | rs3768425  | A | G | 3 | 0.0358    | 0.1567 | 0.9281 | 0.8759 | 0.0031 | 82.65 |
| 3  | 124820628 | rs820459   | A | G | 4 | 0.004215  | 0.1569 | 0.8056 | 0.8121 | 0.0238 | 68.29 |
| 1  | 225245323 | rs1045290  | A | G | 3 | 0.03616   | 0.1571 | 0.9282 | 0.8763 | 0.0033 | 82.53 |
| 1  | 225245336 | rs1045289  | C | T | 3 | 0.03616   | 0.1571 | 0.9282 | 0.8763 | 0.0033 | 82.53 |
| 4  | 136730007 | rs2086327  | A | C | 4 | 0.003334  | 0.1574 | 0.9026 | 0.9181 | 0.0712 | 57.28 |
| 8  | 10767033  | rs2409667  | A | G | 4 | 0.09322   | 0.158  | 1.0821 | 1.1673 | 0.0069 | 75.3  |
| 4  | 95498237  | rs6839224  | G | T | 4 | 0.01489   | 0.1582 | 0.916  | 0.9    | 0.0168 | 70.63 |
| 18 | 41961878  | rs4243278  | A | G | 4 | 0.01953   | 0.1584 | 1.1307 | 1.1717 | 0.0167 | 70.68 |
| 1  | 225270854 | rs17600725 | A | G | 4 | 0.03634   | 0.1586 | 0.9306 | 0.901  | 0.0135 | 71.95 |
| 1  | 225248546 | rs3795451  | C | T | 3 | 0.0372    | 0.1589 | 0.9286 | 0.8766 | 0.0032 | 82.62 |
| 1  | 225262834 | rs11588904 | C | T | 4 | 0.0403    | 0.1592 | 1.073  | 1.1147 | 0.0085 | 74.35 |
| 21 | 40087288  | rs16998521 | A | G | 4 | 0.01577   | 0.1594 | 1.1627 | 1.2001 | 0.0171 | 70.53 |
| 1  | 225248461 | rs3795449  | G | T | 3 | 0.03789   | 0.1595 | 1.0766 | 1.1407 | 0.0031 | 82.65 |
| 3  | 15118432  | rs9839836  | G | T | 4 | 0.05938   | 0.1595 | 1.1615 | 1.2706 | 0.0088 | 74.16 |
| 3  | 124819672 | rs848145   | A | G | 4 | 0.00426   | 0.1597 | 1.2417 | 1.2304 | 0.0236 | 68.35 |
| 3  | 63493103  | rs11130939 | G | T | 4 | 0.0001427 | 0.1598 | 1.1889 | 1.1367 | 0.0231 | 68.48 |
| 4  | 95497524  | rs1593554  | C | T | 4 | 0.01481   | 0.1598 | 1.0917 | 1.111  | 0.0165 | 70.76 |
| 16 | 6606821   | rs7199694  | A | G | 4 | 0.004618  | 0.1598 | 0.9047 | 0.9048 | 0.0242 | 68.16 |
| 18 | 26046673  | rs2960028  | A | T | 4 | 0.07612   | 0.16   | 1.0641 | 1.1013 | 0.031  | 66.19 |
| 1  | 225248177 | rs1062908  | C | G | 3 | 0.03858   | 0.1601 | 0.9291 | 0.8769 | 0.0032 | 82.6  |
| 6  | 99010182  | rs12208539 | G | T | 4 | 0.001274  | 0.1601 | 1.3657 | 1.2642 | 0.0605 | 59.39 |
| 3  | 15090482  | rs9830744  | C | T | 4 | 0.06212   | 0.1602 | 0.8629 | 0.7919 | 0.0114 | 72.9  |
| 6  | 116121301 | rs9374564  | C | T | 4 | 0.01964   | 0.1602 | 0.9044 | 0.8899 | 0.0285 | 66.9  |
| 7  | 22565267  | rs9655226  | C | T | 4 | 0.06      | 0.1603 | 0.9339 | 0.9062 | 0.0345 | 65.28 |
| 4  | 95489901  | rs2865353  | C | T | 4 | 0.007475  | 0.1605 | 0.9074 | 0.8992 | 0.0159 | 71    |
| 3  | 15003482  | rs17040623 | A | G | 4 | 0.07313   | 0.1606 | 0.8671 | 0.7895 | 0.0105 | 73.29 |
| 1  | 225248178 | rs1045252  | A | G | 3 | 0.03826   | 0.1607 | 0.929  | 0.8768 | 0.0031 | 82.71 |
| 1  | 225259202 | rs2297418  | A | C | 3 | 0.03826   | 0.1607 | 0.929  | 0.8768 | 0.0031 | 82.71 |
| 10 | 30254709  | rs1246758  | A | C | 4 | 0.2028    | 0.1608 | 0.9484 | 0.8738 | 0.0072 | 75.14 |
| 3  | 63482284  | rs7614676  | A | G | 4 | 0.0001355 | 0.1609 | 1.1912 | 1.1454 | 0.0147 | 71.47 |
| 11 | 123073531 | rs4430519  | G | T | 4 | 0.09518   | 0.1609 | 0.8769 | 0.813  | 0.0319 | 65.96 |

|    |           |            |   |   |   |           |        |        |        |        |       |
|----|-----------|------------|---|---|---|-----------|--------|--------|--------|--------|-------|
| 18 | 48306727  | rs1349930  | C | G | 4 | 0.01083   | 0.161  | 1.1351 | 1.1378 | 0.048  | 62.06 |
| 1  | 199813623 | rs633696   | C | T | 4 | 0.1654    | 0.1616 | 1.1085 | 1.2911 | 0.0017 | 80.17 |
| 1  | 199829227 | rs685982   | A | T | 4 | 0.38      | 0.1616 | 1.0354 | 1.1811 | 0.0001 | 86.26 |
| 4  | 154168497 | rs1111986  | A | G | 4 | 0.009855  | 0.1618 | 1.0999 | 1.1085 | 0.0261 | 67.57 |
| 6  | 99009252  | rs12200527 | A | T | 4 | 0.001437  | 0.1621 | 1.3612 | 1.261  | 0.0629 | 58.91 |
| 13 | 21758087  | rs9550833  | A | C | 4 | 0.01333   | 0.1621 | 0.9148 | 0.9148 | 0.0616 | 59.17 |
| 1  | 212356924 | rs1660377  | A | T | 4 | 0.002373  | 0.1622 | 1.3577 | 1.2544 | 0.1229 | 48.08 |
| 9  | 70347279  | rs7860486  | A | C | 4 | 0.01175   | 0.1623 | 0.8799 | 0.8925 | 0.1072 | 50.76 |
| 3  | 15104541  | rs17040729 | G | T | 4 | 0.06618   | 0.1627 | 1.1557 | 1.2733 | 0.007  | 75.23 |
| 1  | 225262499 | rs6426559  | C | T | 4 | 0.04251   | 0.163  | 1.0722 | 1.1142 | 0.0081 | 74.6  |
| 13 | 21759295  | rs9506821  | A | G | 4 | 0.009367  | 0.163  | 0.9095 | 0.9093 | 0.0419 | 63.46 |
| 6  | 25253691  | rs9379723  | C | T | 4 | 0.01495   | 0.1632 | 1.1189 | 1.1036 | 0.1336 | 46.3  |
| 1  | 225238913 | rs12593    | C | T | 4 | 0.03722   | 0.1633 | 0.9309 | 0.8956 | 0.0066 | 75.5  |
| 11 | 10776960  | rs4909953  | A | C | 4 | 0.003709  | 0.1635 | 0.8245 | 0.8385 | 0.0393 | 64.08 |
| 2  | 57636788  | rs13412537 | C | G | 3 | 0.0001735 | 0.1638 | 0.5305 | 0.5931 | 0.0314 | 71.11 |
| 3  | 15088046  | rs3773478  | C | T | 4 | 0.07169   | 0.164  | 0.8672 | 0.7888 | 0.0087 | 74.23 |
| 3  | 15034334  | rs11128731 | C | T | 4 | 0.08026   | 0.1641 | 1.1486 | 1.2552 | 0.0137 | 71.84 |
| 17 | 45487642  | rs4794094  | C | T | 4 | 0.1587    | 0.1641 | 1.0781 | 1.1723 | 0.01   | 73.55 |
| 11 | 123076941 | rs1275055  | A | T | 4 | 0.0804    | 0.1642 | 0.8691 | 0.8085 | 0.0284 | 66.92 |
| 12 | 2805760   | rs2334868  | A | G | 4 | 0.005535  | 0.1642 | 0.7805 | 0.8222 | 0.1322 | 46.52 |
| 1  | 74169484  | rs2733262  | C | T | 4 | 0.05395   | 0.1645 | 0.9333 | 0.8957 | 0.0088 | 74.17 |
| 1  | 199826786 | rs608356   | A | G | 4 | 0.3863    | 0.1646 | 0.9663 | 0.8484 | 0.0001 | 86.16 |
| 4  | 136730586 | rs2035293  | A | G | 4 | 0.003358  | 0.1648 | 0.9027 | 0.9185 | 0.0652 | 58.45 |
| 11 | 120728846 | rs17125182 | A | G | 4 | 0.01866   | 0.1648 | 0.7755 | 0.7539 | 0.0347 | 65.21 |
| 1  | 116595268 | rs11583110 | A | C | 4 | 0.01155   | 0.1649 | 1.0991 | 1.0907 | 0.0845 | 54.78 |
| 18 | 48292120  | rs1031062  | G | T | 4 | 0.01114   | 0.1655 | 0.882  | 0.8771 | 0.0389 | 64.16 |
| 6  | 99023189  | rs9482747  | C | T | 4 | 0.001242  | 0.1657 | 1.3662 | 1.27   | 0.048  | 62.04 |
| 1  | 74212970  | rs6424568  | A | G | 4 | 0.05823   | 0.1658 | 0.9333 | 0.8883 | 0.0044 | 77.12 |
| 6  | 99028026  | rs9482751  | C | T | 4 | 0.001135  | 0.1659 | 1.3697 | 1.2718 | 0.0462 | 62.45 |
| 3  | 15094808  | rs2306855  | C | T | 4 | 0.07291   | 0.1661 | 1.1525 | 1.2684 | 0.0081 | 74.61 |
| 7  | 146317484 | rs1524344  | C | G | 4 | 0.003631  | 0.1664 | 1.1946 | 1.1439 | 0.1119 | 49.95 |
| 18 | 10667979  | rs600419   | C | T | 3 | 0.08501   | 0.1664 | 0.9225 | 0.7997 | 0.0005 | 86.93 |
| 6  | 99023244  | rs9885878  | A | C | 4 | 0.001216  | 0.1666 | 0.7314 | 0.7873 | 0.0474 | 62.18 |
| 6  | 99024090  | rs9491637  | A | G | 4 | 0.001208  | 0.1667 | 1.3674 | 1.2704 | 0.0472 | 62.23 |
| 6  | 99025985  | rs9491640  | A | C | 4 | 0.001178  | 0.1668 | 0.7308 | 0.7868 | 0.0466 | 62.37 |
| 4  | 95492168  | rs4282187  | C | T | 4 | 0.008066  | 0.1669 | 0.9082 | 0.9002 | 0.0151 | 71.29 |
| 9  | 120842902 | rs11794075 | A | G | 4 | 0.0859    | 0.167  | 0.9024 | 0.8217 | 0.0028 | 78.68 |

|    |           |            |   |   |   |           |        |        |        |        |       |
|----|-----------|------------|---|---|---|-----------|--------|--------|--------|--------|-------|
| 4  | 95497016  | rs10020236 | A | G | 4 | 0.01894   | 0.1673 | 1.0905 | 1.1111 | 0.0168 | 70.66 |
| 11 | 79787547  | rs10792479 | C | T | 4 | 0.1748    | 0.1676 | 1.057  | 1.14   | 0.0049 | 76.69 |
| 13 | 21758866  | rs4770264  | A | G | 4 | 0.01387   | 0.1677 | 1.0932 | 1.0943 | 0.0535 | 60.85 |
| 11 | 80981521  | rs7933268  | G | T | 4 | 0.2326    | 0.168  | 0.9592 | 0.8828 | 0.0012 | 81.19 |
| 1  | 225267653 | rs6704144  | C | G | 4 | 0.04201   | 0.1681 | 1.0724 | 1.1133 | 0.0077 | 74.81 |
| 3  | 15109324  | rs17040733 | C | G | 4 | 0.06734   | 0.1681 | 0.8645 | 0.7831 | 0.0057 | 76.08 |
| 1  | 88292306  | rs12568661 | A | G | 4 | 0.4292    | 0.1682 | 0.971  | 0.8707 | 0.0008 | 82.22 |
| 4  | 95494865  | rs6840479  | A | G | 4 | 0.009087  | 0.1682 | 1.0995 | 1.1099 | 0.0161 | 70.92 |
| 18 | 10666564  | rs510529   | T | C | 3 | 0.08945   | 0.1683 | 0.9235 | 0.8003 | 0.0005 | 86.92 |
| 1  | 199818411 | rs677390   | A | G | 4 | 0.4011    | 0.1685 | 0.9674 | 0.8493 | 0.0001 | 86.33 |
| 1  | 88297128  | rs4656008  | G | T | 4 | 0.4576    | 0.1687 | 1.028  | 1.1524 | 0.0005 | 83.09 |
| 1  | 88301956  | rs10754315 | C | T | 4 | 0.4511    | 0.1687 | 0.9718 | 0.8621 | 0.0003 | 84.08 |
| 2  | 106764565 | rs728241   | A | G | 4 | 0.0009952 | 0.1689 | 0.8768 | 0.905  | 0.049  | 61.82 |
| 6  | 99028948  | rs9482752  | A | C | 4 | 0.001165  | 0.1689 | 0.7306 | 0.787  | 0.0453 | 62.67 |
| 11 | 80981836  | rs7950006  | A | G | 4 | 0.2342    | 0.1689 | 0.9594 | 0.8832 | 0.0012 | 81.15 |
| 9  | 70346371  | rs10869020 | A | G | 4 | 0.01193   | 0.169  | 1.1362 | 1.1195 | 0.1025 | 51.57 |
| 10 | 30256403  | rs2776630  | C | T | 4 | 0.1984    | 0.1691 | 0.9483 | 0.8803 | 0.0101 | 73.53 |
| 2  | 209684516 | rs1439724  | A | G | 4 | 0.002308  | 0.1695 | 1.1631 | 1.1299 | 0.0569 | 60.14 |
| 3  | 15093737  | rs746665   | A | T | 4 | 0.07712   | 0.1695 | 0.8695 | 0.7896 | 0.0079 | 74.7  |
| 2  | 106764687 | rs728239   | C | T | 4 | 0.001247  | 0.1699 | 0.8782 | 0.9054 | 0.0513 | 61.32 |
| 2  | 106764888 | rs728240   | G | T | 4 | 0.001148  | 0.1701 | 1.1398 | 1.1052 | 0.0496 | 61.69 |
| 3  | 14995353  | rs10510434 | A | G | 4 | 0.08555   | 0.1703 | 0.8731 | 0.7942 | 0.01   | 73.57 |
| 1  | 74186512  | rs2789706  | C | T | 4 | 0.05726   | 0.1704 | 0.9342 | 0.8938 | 0.006  | 75.88 |
| 2  | 30855634  | rs6754923  | C | G | 4 | 0.002351  | 0.1705 | 1.113  | 1.084  | 0.0852 | 54.66 |
| 1  | 110908053 | rs6537671  | C | T | 4 | 0.01288   | 0.1707 | 1.1027 | 1.1137 | 0.0238 | 68.28 |
| 3  | 15094724  | rs2306854  | A | C | 4 | 0.07931   | 0.171  | 0.8707 | 0.7903 | 0.0078 | 74.78 |
| 4  | 154491352 | rs6821156  | A | T | 4 | 0.2967    | 0.171  | 0.9631 | 0.876  | 0.0007 | 82.45 |
| 17 | 24561368  | rs7213514  | C | T | 4 | 0.2558    | 0.1712 | 0.9606 | 0.885  | 0.0019 | 79.83 |
| 1  | 225267729 | rs6665290  | C | T | 4 | 0.03359   | 0.1713 | 0.9279 | 0.8967 | 0.0076 | 74.87 |
| 2  | 128352457 | rs7566163  | A | G | 4 | 0.003727  | 0.1717 | 1.1068 | 1.0971 | 0.0324 | 65.83 |
| 2  | 128353695 | rs2405635  | A | G | 4 | 0.003673  | 0.1719 | 0.9034 | 0.9114 | 0.032  | 65.93 |
| 1  | 199817630 | rs585041   | A | T | 4 | 0.4373    | 0.1723 | 1.031  | 1.1757 | 0.0001 | 86.45 |
| 3  | 18376571  | rs11927883 | A | G | 4 | 0.002684  | 0.1727 | 0.7612 | 0.7425 | 0.0042 | 77.29 |
| 3  | 63498351  | rs11926493 | C | T | 4 | 0.0002859 | 0.1727 | 1.1792 | 1.1296 | 0.0271 | 67.28 |
| 1  | 212355520 | rs1660383  | A | G | 4 | 0.002049  | 0.1729 | 1.3719 | 1.2655 | 0.0959 | 52.73 |
| 10 | 30256668  | rs1270449  | C | T | 4 | 0.2194    | 0.1733 | 1.052  | 1.1351 | 0.0097 | 73.73 |
| 1  | 225271954 | rs3795453  | C | T | 4 | 0.04682   | 0.1736 | 1.0707 | 1.1048 | 0.0148 | 71.4  |

|    |           |            |   |   |   |           |        |        |        |        |       |
|----|-----------|------------|---|---|---|-----------|--------|--------|--------|--------|-------|
| 12 | 13260841  | rs3191064  | A | G | 3 | 0.01324   | 0.1736 | 1.1977 | 1.2401 | 0.0235 | 73.33 |
| 7  | 84683482  | rs2159579  | G | T | 4 | 0.1668    | 0.1744 | 0.9467 | 0.8818 | 0.0049 | 76.73 |
| 1  | 225266341 | rs1929862  | A | G | 4 | 0.04528   | 0.1752 | 1.0712 | 1.1119 | 0.0073 | 75.04 |
| 18 | 37290341  | rs2703167  | A | C | 4 | 0.04223   | 0.1753 | 0.8789 | 0.7862 | 0.0005 | 83.1  |
| 4  | 136716070 | rs11935796 | A | G | 4 | 0.01629   | 0.1755 | 0.9046 | 0.9112 | 0.0891 | 53.95 |
| 11 | 79783565  | rs7482266  | C | T | 4 | 0.1886    | 0.1759 | 0.9469 | 0.8816 | 0.0072 | 75.1  |
| 6  | 99006740  | rs9491610  | A | G | 4 | 0.001839  | 0.1763 | 1.3575 | 1.257  | 0.0597 | 59.56 |
| 1  | 225264498 | rs6659424  | A | G | 4 | 0.04559   | 0.1764 | 0.9336 | 0.8994 | 0.0071 | 75.17 |
| 11 | 41020808  | rs355220   | C | T | 4 | 0.0152    | 0.1765 | 1.2759 | 1.2589 | 0.0714 | 57.23 |
| 17 | 45486459  | rs9890077  | A | G | 4 | 0.1672    | 0.1765 | 0.929  | 0.861  | 0.0137 | 71.85 |
| 11 | 79783016  | rs2448273  | A | C | 4 | 0.1831    | 0.177  | 1.0563 | 1.1362 | 0.0055 | 76.26 |
| 3  | 106404720 | rs6794974  | A | G | 4 | 0.003319  | 0.1772 | 0.8746 | 0.9026 | 0.087  | 54.34 |
| 4  | 95496334  | rs6532481  | G | T | 4 | 0.01535   | 0.1772 | 0.9164 | 0.9022 | 0.0138 | 71.84 |
| 4  | 154496631 | rs7340984  | C | G | 4 | 0.3073    | 0.1772 | 0.9649 | 0.8826 | 0.0009 | 81.8  |
| 6  | 30041240  | rs6457109  | C | T | 3 | 0.0005814 | 0.1772 | 1.3878 | 1.2709 | 0.0936 | 57.77 |
| 21 | 32310264  | rs17666683 | G | T | 4 | 0.02275   | 0.1772 | 1.1189 | 1.1107 | 0.1111 | 50.08 |
| 1  | 19518260  | rs4912069  | A | G | 4 | 0.05823   | 0.1776 | 1.0768 | 1.1147 | 0.019  | 69.84 |
| 4  | 95496437  | rs6532482  | A | G | 4 | 0.01563   | 0.1777 | 1.0909 | 1.1081 | 0.0139 | 71.78 |
| 4  | 136738151 | rs2174394  | A | G | 4 | 0.0114    | 0.1791 | 1.1503 | 1.1345 | 0.0677 | 57.95 |
| 3  | 18377595  | rs3922895  | A | T | 4 | 0.003064  | 0.1793 | 1.3087 | 1.3413 | 0.0041 | 77.42 |
| 1  | 74174906  | rs10890092 | C | T | 4 | 0.05952   | 0.1798 | 1.0698 | 1.1149 | 0.0068 | 75.35 |
| 1  | 225263572 | rs12409755 | A | T | 4 | 0.0479    | 0.1798 | 0.9343 | 0.9005 | 0.0074 | 74.98 |
| 2  | 106757512 | rs1448103  | A | G | 4 | 0.0009263 | 0.18   | 0.8796 | 0.9096 | 0.0493 | 61.76 |
| 11 | 79784289  | rs2448274  | C | G | 4 | 0.1944    | 0.18   | 0.9476 | 0.8829 | 0.0076 | 74.89 |
| 4  | 95497050  | rs9997915  | C | T | 4 | 0.0167    | 0.1801 | 1.09   | 1.1078 | 0.0136 | 71.92 |
| 14 | 31526109  | rs8017647  | C | T | 4 | 0.01395   | 0.1801 | 1.1127 | 1.1081 | 0.0593 | 59.63 |
| 1  | 88285953  | rs10923014 | C | T | 4 | 0.3806    | 0.1803 | 1.0322 | 1.1369 | 0.001  | 81.47 |
| 13 | 21758269  | rs9506819  | G | T | 4 | 0.01567   | 0.1806 | 0.9167 | 0.9164 | 0.0527 | 61.03 |
| 18 | 10664815  | rs8095590  | T | C | 3 | 0.1169    | 0.1807 | 0.9299 | 0.7996 | 0.0003 | 87.61 |
| 1  | 88284959  | rs12117077 | C | T | 4 | 0.3854    | 0.1811 | 0.9691 | 0.8797 | 0.001  | 81.51 |
| 4  | 72358121  | rs980363   | A | G | 4 | 0.1898    | 0.1813 | 0.9492 | 0.866  | 0.0005 | 83.06 |
| 1  | 74234416  | rs4556311  | A | G | 4 | 0.2661    | 0.1815 | 0.9597 | 0.8889 | 0.0039 | 77.59 |
| 11 | 81054378  | rs17142764 | C | G | 4 | 0.2055    | 0.1816 | 0.9483 | 0.879  | 0.0051 | 76.58 |
| 20 | 8456036   | rs1569604  | A | G | 4 | 0.1547    | 0.1817 | 0.9502 | 0.9033 | 0.0142 | 71.67 |
| 18 | 48349538  | rs11665228 | C | T | 4 | 0.01181   | 0.1819 | 0.8822 | 0.8733 | 0.0234 | 68.41 |
| 2  | 106759973 | rs17033251 | C | T | 4 | 0.001057  | 0.182  | 0.88   | 0.9093 | 0.0488 | 61.87 |
| 1  | 74140143  | rs11210366 | C | T | 4 | 0.1583    | 0.1821 | 0.9488 | 0.8837 | 0.0021 | 79.56 |

|    |           |            |   |   |   |           |        |        |        |        |       |
|----|-----------|------------|---|---|---|-----------|--------|--------|--------|--------|-------|
| 2  | 219061439 | rs10932782 | C | T | 3 | 0.121     | 0.1823 | 0.9435 | 0.885  | 0.008  | 79.29 |
| 10 | 30437845  | rs12220219 | C | T | 4 | 0.001128  | 0.1824 | 1.131  | 1.0882 | 0.0846 | 54.77 |
| 6  | 99005624  | rs9491608  | A | G | 4 | 0.002217  | 0.1825 | 0.7379 | 0.7954 | 0.0579 | 59.94 |
| 1  | 88276958  | rs12143926 | C | T | 4 | 0.3866    | 0.1827 | 0.9692 | 0.8808 | 0.0011 | 81.26 |
| 3  | 106423032 | rs12639365 | A | T | 4 | 0.007369  | 0.1827 | 1.1404 | 1.1118 | 0.0975 | 52.45 |
| 13 | 89501299  | rs9583775  | A | G | 4 | 0.009174  | 0.1828 | 0.8912 | 0.9105 | 0.1081 | 50.61 |
| 2  | 106761667 | rs1448105  | A | T | 4 | 0.0009782 | 0.183  | 0.8792 | 0.9091 | 0.0472 | 62.24 |
| 3  | 106400088 | rs1568420  | C | T | 4 | 0.003441  | 0.1831 | 0.8751 | 0.9034 | 0.0846 | 54.76 |
| 8  | 127597922 | rs11986722 | C | G | 4 | 0.05688   | 0.1836 | 0.9009 | 0.8529 | 0.0107 | 73.21 |
| 10 | 30338528  | rs10826749 | C | T | 4 | 0.01995   | 0.1836 | 1.0845 | 1.077  | 0.1062 | 50.94 |
| 4  | 154494114 | rs6841435  | C | T | 4 | 0.3195    | 0.1838 | 0.9649 | 0.882  | 0.0009 | 81.75 |
| 1  | 88286774  | rs4655998  | A | C | 4 | 0.4045    | 0.1839 | 1.0306 | 1.1372 | 0.0009 | 81.87 |
| 3  | 15090876  | rs9868848  | A | G | 4 | 0.09794   | 0.1841 | 0.8779 | 0.7952 | 0.0072 | 75.1  |
| 3  | 172404356 | rs16855954 | A | C | 2 | 0.004868  | 0.1841 | 0.2805 | 0.331  | 0.0763 | 68.16 |
| 2  | 57633546  | rs10153799 | G | T | 3 | 0.0003334 | 0.1842 | 1.8133 | 1.6418 | 0.0305 | 71.34 |
| 2  | 106756383 | rs6747891  | A | G | 4 | 0.0009687 | 0.1842 | 0.8801 | 0.9102 | 0.0484 | 61.97 |
| 1  | 74160464  | rs1340424  | C | G | 4 | 0.06678   | 0.1846 | 1.0679 | 1.111  | 0.0087 | 74.22 |
| 1  | 88287316  | rs4656002  | C | T | 4 | 0.4003    | 0.1846 | 1.0309 | 1.1368 | 0.0009 | 81.84 |
| 1  | 88286988  | rs4656000  | A | G | 4 | 0.4013    | 0.1847 | 0.9701 | 0.88   | 0.0009 | 81.74 |
| 21 | 40053815  | rs2837175  | C | T | 4 | 0.01752   | 0.1851 | 1.0927 | 1.0834 | 0.0971 | 52.52 |
| 1  | 225263125 | rs12403236 | C | G | 4 | 0.05092   | 0.1854 | 0.9351 | 0.9012 | 0.007  | 75.25 |
| 1  | 88287567  | rs10923015 | A | T | 4 | 0.4009    | 0.1855 | 0.9701 | 0.88   | 0.0009 | 81.79 |
| 1  | 88288082  | rs4656003  | C | T | 4 | 0.4019    | 0.1856 | 1.0308 | 1.1364 | 0.0009 | 81.82 |
| 1  | 94942350  | rs841329   | A | G | 4 | 0.08782   | 0.1856 | 1.0632 | 1.0982 | 0.0279 | 67.07 |
| 1  | 88287018  | rs4656001  | A | G | 4 | 0.407     | 0.1859 | 1.0305 | 1.1364 | 0.0009 | 81.85 |
| 6  | 99031598  | rs11154359 | A | G | 4 | 0.001465  | 0.186  | 0.7318 | 0.7906 | 0.0427 | 63.27 |
| 1  | 19517442  | rs2064378  | A | G | 4 | 0.06575   | 0.1861 | 1.0752 | 1.1143 | 0.0175 | 70.38 |
| 12 | 78733055  | rs17005986 | C | T | 3 | 0.03628   | 0.1863 | 1.4006 | 1.5639 | 0.0298 | 71.55 |
| 4  | 74585279  | rs4311283  | C | T | 3 | 0.02105   | 0.1869 | 0.7312 | 0.6339 | 0.0065 | 80.16 |
| 12 | 78691492  | rs12833727 | C | G | 3 | 0.03661   | 0.1869 | 0.7126 | 0.6385 | 0.0298 | 71.52 |
| 6  | 99032521  | rs9491644  | A | G | 4 | 0.00155   | 0.1872 | 1.3656 | 1.2649 | 0.0423 | 63.36 |
| 11 | 9123690   | rs2291840  | A | C | 4 | 0.008373  | 0.1874 | 1.1266 | 1.1102 | 0.0654 | 58.41 |
| 12 | 78710196  | rs7961195  | C | T | 3 | 0.03614   | 0.1874 | 1.4045 | 1.5685 | 0.0289 | 71.77 |
| 2  | 106755485 | rs11888992 | C | G | 4 | 0.0009812 | 0.1877 | 1.1361 | 1.0983 | 0.0469 | 62.31 |
| 3  | 18374868  | rs7621961  | A | G | 4 | 0.002462  | 0.1877 | 1.3243 | 1.3446 | 0.0039 | 77.55 |
| 6  | 41405361  | rs9471573  | A | G | 4 | 0.0006457 | 0.188  | 0.8856 | 0.9008 | 0.0086 | 74.28 |
| 4  | 166318168 | rs4132377  | C | G | 3 | 0.01012   | 0.1882 | 0.8221 | 0.8152 | 0.0302 | 71.43 |



|    |           |            |   |   |   |           |        |        |        |        |       |
|----|-----------|------------|---|---|---|-----------|--------|--------|--------|--------|-------|
| 2  | 128340581 | rs2118204  | C | T | 4 | 0.009668  | 0.1889 | 1.0967 | 1.09   | 0.0482 | 62    |
| 1  | 110906436 | rs1105101  | C | G | 4 | 0.01409   | 0.1891 | 0.9074 | 0.9002 | 0.0213 | 69.06 |
| 1  | 74176368  | rs1340447  | A | C | 4 | 0.07158   | 0.1894 | 0.938  | 0.8988 | 0.0062 | 75.75 |
| 2  | 30856523  | rs17041560 | A | G | 4 | 0.002911  | 0.1901 | 0.9005 | 0.925  | 0.0795 | 55.71 |
| 4  | 136732205 | rs1038151  | G | T | 4 | 0.004313  | 0.1905 | 1.1048 | 1.0856 | 0.0556 | 60.42 |
| 10 | 30337993  | rs1418276  | C | T | 4 | 0.02014   | 0.1905 | 1.0849 | 1.0764 | 0.1048 | 51.17 |
| 1  | 199814155 | rs617053   | A | G | 4 | 0.5144    | 0.1906 | 1.0261 | 1.1648 | 0.0001 | 85.77 |
| 2  | 30846223  | rs17010236 | G | T | 4 | 0.0002358 | 0.1906 | 1.145  | 1.0973 | 0.0335 | 65.53 |
| 21 | 40078450  | rs4337554  | A | G | 4 | 0.006698  | 0.1906 | 0.9024 | 0.914  | 0.0508 | 61.44 |
| 7  | 145214888 | rs4370447  | A | G | 4 | 0.1212    | 0.1908 | 0.9101 | 0.8553 | 0.0289 | 66.79 |
| 2  | 106755321 | rs11887836 | C | G | 4 | 0.001019  | 0.1909 | 1.1356 | 1.0978 | 0.0461 | 62.48 |
| 20 | 24094378  | rs2208014  | C | T | 3 | 0.0526    | 0.1909 | 0.7576 | 0.6479 | 0.0168 | 75.54 |
| 1  | 110905211 | rs6656346  | A | G | 4 | 0.01494   | 0.191  | 1.1002 | 1.1091 | 0.0217 | 68.95 |
| 17 | 51764470  | rs759107   | A | G | 4 | 0.0002643 | 0.191  | 1.1513 | 1.1088 | 0.0217 | 68.95 |
| 1  | 88293965  | rs12118601 | C | T | 4 | 0.4641    | 0.1921 | 1.0283 | 1.1482 | 0.0005 | 83.23 |
| 3  | 124839752 | rs820464   | C | G | 4 | 0.01391   | 0.1923 | 1.1862 | 1.2217 | 0.0086 | 74.32 |
| 2  | 106754304 | rs2377685  | G | T | 4 | 0.0009336 | 0.1924 | 0.8797 | 0.9105 | 0.0435 | 63.07 |
| 1  | 199813717 | rs1267131  | A | C | 4 | 0.4937    | 0.1926 | 0.9731 | 0.8578 | 0.0001 | 85.96 |
| 1  | 74177642  | rs2733267  | A | G | 4 | 0.07306   | 0.193  | 0.9378 | 0.8986 | 0.0059 | 75.98 |
| 1  | 160514028 | rs7511679  | C | T | 4 | 0.08094   | 0.193  | 1.1138 | 1.1951 | 0.0124 | 72.42 |
| 6  | 99032544  | rs9491645  | C | T | 4 | 0.001548  | 0.193  | 1.3671 | 1.266  | 0.0428 | 63.25 |
| 11 | 81005553  | rs1945662  | C | T | 4 | 0.2981    | 0.1932 | 0.9644 | 0.8971 | 0.0037 | 77.79 |
| 1  | 110912891 | rs7526907  | A | G | 4 | 0.0164    | 0.1933 | 0.91   | 0.9049 | 0.0286 | 66.86 |
| 4  | 154177648 | rs17029520 | C | T | 4 | 0.01195   | 0.1935 | 0.9114 | 0.9034 | 0.0154 | 71.19 |
| 4  | 154165619 | rs4696159  | C | T | 4 | 0.01617   | 0.1936 | 0.9132 | 0.9033 | 0.0178 | 70.29 |
| 1  | 160514702 | rs11800645 | G | T | 4 | 0.08226   | 0.1937 | 0.8982 | 0.8367 | 0.0121 | 72.56 |
| 7  | 84686625  | rs2732738  | A | G | 4 | 0.102     | 0.1938 | 0.9347 | 0.8923 | 0.0139 | 71.77 |
| 1  | 199815919 | rs511201   | A | G | 4 | 0.5215    | 0.1939 | 0.9752 | 0.8589 | 0.0001 | 86.18 |
| 4  | 72354319  | rs2602098  | G | T | 4 | 0.1441    | 0.194  | 1.0657 | 1.1897 | 0      | 87.04 |
| 2  | 115905074 | rs7581748  | A | T | 4 | 0.1999    | 0.1944 | 0.9261 | 0.8163 | 0.0006 | 82.75 |
| 6  | 41404359  | rs9471568  | C | T | 4 | 0.0004048 | 0.1947 | 1.1319 | 1.1119 | 0.0052 | 76.49 |
| 7  | 84686884  | rs2732737  | A | G | 4 | 0.1037    | 0.1947 | 0.935  | 0.8923 | 0.0136 | 71.93 |
| 17 | 24510385  | rs902580   | A | C | 4 | 0.2375    | 0.1947 | 1.0426 | 1.1114 | 0.006  | 75.87 |
| 17 | 51775701  | rs2110200  | G | T | 4 | 0.0002615 | 0.1948 | 1.1527 | 1.1091 | 0.0204 | 69.36 |
| 2  | 106754935 | rs11894298 | C | T | 4 | 0.001031  | 0.1954 | 0.8807 | 0.9113 | 0.0443 | 62.89 |
| 2  | 106755254 | rs11894451 | C | T | 4 | 0.001031  | 0.1954 | 0.8807 | 0.9113 | 0.0443 | 62.89 |
| 9  | 77923214  | rs2185227  | A | G | 4 | 0.00375   | 0.1954 | 1.1687 | 1.1409 | 0.039  | 64.15 |

|    |           |            |   |   |   |           |        |        |        |        |       |
|----|-----------|------------|---|---|---|-----------|--------|--------|--------|--------|-------|
| 2  | 40410780  | rs2160236  | C | G | 4 | 0.00207   | 0.1957 | 1.1206 | 1.0838 | 0.0851 | 54.68 |
| 1  | 225264308 | rs6693535  | A | G | 4 | 0.07268   | 0.196  | 1.0648 | 1.1074 | 0.0079 | 74.71 |
| 18 | 37293712  | rs4318293  | A | C | 4 | 0.1203    | 0.1962 | 1.0595 | 1.1147 | 0.0072 | 75.12 |
| 7  | 84685921  | rs2732741  | A | T | 4 | 0.101     | 0.1963 | 1.0705 | 1.1246 | 0.0101 | 73.51 |
| 6  | 41403590  | rs2395773  | C | T | 4 | 0.0004061 | 0.1966 | 1.1318 | 1.1118 | 0.005  | 76.66 |
| 6  | 41403603  | rs2395774  | A | G | 4 | 0.0004061 | 0.1966 | 1.1318 | 1.1118 | 0.005  | 76.66 |
| 4  | 154177907 | rs10012544 | A | T | 4 | 0.01164   | 0.1968 | 1.0982 | 1.1065 | 0.0156 | 71.11 |
| 16 | 6609627   | rs8062885  | C | G | 4 | 0.006605  | 0.1968 | 1.1008 | 1.107  | 0.0093 | 73.93 |
| 4  | 154191355 | rs17029545 | C | T | 4 | 0.007308  | 0.1969 | 1.1045 | 1.0997 | 0.0286 | 66.86 |
| 6  | 41403756  | rs4605877  | G | T | 4 | 0.0004128 | 0.197  | 0.8837 | 0.8996 | 0.005  | 76.64 |
| 12 | 88790264  | rs12424558 | C | G | 4 | 0.008189  | 0.1971 | 0.8459 | 0.8771 | 0.1016 | 51.72 |
| 13 | 43897258  | rs2325129  | C | T | 4 | 0.03638   | 0.1974 | 0.9277 | 0.9003 | 0.0078 | 74.77 |
| 16 | 53798452  | rs12935507 | A | T | 4 | 0.009751  | 0.1974 | 0.8762 | 0.8687 | 0.0144 | 71.57 |
| 1  | 74175716  | rs2733265  | C | G | 4 | 0.081     | 0.1976 | 0.9399 | 0.9    | 0.0058 | 76.07 |
| 4  | 154568191 | rs6535917  | A | G | 4 | 0.2577    | 0.1978 | 1.0422 | 1.1108 | 0.0087 | 74.25 |
| 4  | 92465367  | rs3762827  | A | G | 3 | 0.1813    | 0.198  | 1.0559 | 1.1573 | 0.0019 | 83.98 |
| 18 | 37374178  | rs2587632  | C | T | 4 | 0.1287    | 0.1982 | 1.0584 | 1.1    | 0.0257 | 67.7  |
| 18 | 37373309  | rs2587634  | C | T | 4 | 0.1296    | 0.1985 | 1.0582 | 1.0996 | 0.0265 | 67.47 |
| 6  | 41404430  | rs13208294 | A | G | 4 | 0.0004265 | 0.1987 | 1.1313 | 1.1113 | 0.005  | 76.66 |
| 6  | 41404488  | rs13208406 | A | C | 4 | 0.0004265 | 0.1987 | 1.1313 | 1.1113 | 0.005  | 76.66 |
| 6  | 41405993  | rs2395775  | C | G | 4 | 0.0004835 | 0.1988 | 1.1312 | 1.112  | 0.005  | 76.64 |
| 17 | 24523266  | rs6505114  | A | G | 4 | 0.2518    | 0.1989 | 1.0413 | 1.1112 | 0.0056 | 76.15 |
| 6  | 41406187  | rs10755717 | A | G | 4 | 0.0005452 | 0.199  | 1.1311 | 1.1128 | 0.005  | 76.63 |
| 18 | 37368108  | rs2612339  | A | G | 4 | 0.1285    | 0.199  | 1.0579 | 1.0994 | 0.025  | 67.89 |
| 6  | 41400115  | rs10807260 | C | T | 4 | 0.0004575 | 0.1991 | 0.8845 | 0.8993 | 0.0046 | 76.99 |
| 6  | 41400213  | rs10807261 | A | C | 4 | 0.0004575 | 0.1991 | 0.8845 | 0.8993 | 0.0046 | 76.99 |
| 7  | 84686087  | rs2534851  | G | T | 4 | 0.1054    | 0.1993 | 0.9353 | 0.8937 | 0.0143 | 71.63 |
| 11 | 81004683  | rs10897849 | A | G | 4 | 0.3174    | 0.1993 | 0.9657 | 0.8983 | 0.0036 | 77.84 |
| 21 | 40101946  | rs2410182  | A | G | 4 | 0.005898  | 0.1996 | 0.9074 | 0.923  | 0.0621 | 59.07 |
| 6  | 41402893  | rs13219519 | A | T | 4 | 0.0004458 | 0.1998 | 0.8843 | 0.8993 | 0.0045 | 77.04 |
| 6  | 41401304  | rs12198812 | C | T | 4 | 0.000461  | 0.2004 | 0.8846 | 0.8994 | 0.0045 | 77.05 |
| 6  | 41402924  | rs13203392 | C | T | 4 | 0.000442  | 0.2007 | 1.131  | 1.1119 | 0.0044 | 77.12 |
| 4  | 154181234 | rs4583737  | A | C | 3 | 0.006525  | 0.2008 | 1.1095 | 1.1227 | 0.0093 | 78.62 |
| 6  | 41402041  | rs9462699  | A | G | 4 | 0.0004556 | 0.2008 | 1.1306 | 1.1118 | 0.0044 | 77.11 |
| 18 | 37343203  | rs2587642  | C | T | 4 | 0.1273    | 0.2008 | 1.0568 | 1.114  | 0.0053 | 76.43 |
| 6  | 41399757  | rs9471557  | C | T | 4 | 0.0004697 | 0.2009 | 1.1303 | 1.1118 | 0.0044 | 77.1  |
| 6  | 41406742  | rs7771870  | A | T | 4 | 0.000532  | 0.2009 | 1.1314 | 1.1127 | 0.0048 | 76.81 |

|    |           |            |   |   |   |           |        |        |        |        |       |
|----|-----------|------------|---|---|---|-----------|--------|--------|--------|--------|-------|
| 6  | 41399986  | rs9471560  | A | G | 4 | 0.0004499 | 0.201  | 0.8844 | 0.8992 | 0.0043 | 77.21 |
| 11 | 81005829  | rs7946763  | A | C | 4 | 0.328     | 0.201  | 1.0347 | 1.1134 | 0.0034 | 78.07 |
| 6  | 41404657  | rs12525710 | C | T | 4 | 0.0004374 | 0.2013 | 1.131  | 1.1106 | 0.005  | 76.67 |
| 7  | 145228893 | rs12703745 | A | G | 4 | 0.1398    | 0.2014 | 1.0935 | 1.163  | 0.0308 | 66.26 |
| 6  | 41405925  | rs1905568  | C | T | 4 | 0.0005201 | 0.2018 | 1.1303 | 1.1113 | 0.0049 | 76.74 |
| 15 | 58790190  | rs8027032  | C | T | 3 | 0.22      | 0.2019 | 0.9287 | 0.7528 | 0.0004 | 87.17 |
| 2  | 115906362 | rs1712005  | A | G | 4 | 0.2063    | 0.2021 | 1.0789 | 1.2298 | 0.0003 | 83.88 |
| 12 | 60704889  | rs348696   | C | T | 4 | 0.1411    | 0.2021 | 0.9419 | 0.8987 | 0.0172 | 70.5  |
| 6  | 99034084  | rs9491646  | A | G | 4 | 0.00185   | 0.2027 | 0.737  | 0.7949 | 0.0382 | 64.35 |
| 2  | 115906019 | rs1717054  | C | T | 4 | 0.2144    | 0.203  | 0.9281 | 0.8146 | 0.0004 | 83.67 |
| 3  | 27906342  | rs993668   | C | G | 4 | 0.02469   | 0.2032 | 1.1471 | 1.1327 | 0.0976 | 52.44 |
| 2  | 44191376  | rs6732415  | A | G | 4 | 0.002166  | 0.2033 | 1.4306 | 1.4036 | 0.0147 | 71.44 |
| 18 | 37368855  | rs2848770  | A | G | 4 | 0.1335    | 0.2033 | 1.0576 | 1.0994 | 0.0241 | 68.17 |
| 5  | 28807655  | rs1423298  | C | T | 4 | 0.03204   | 0.2034 | 1.0966 | 1.1292 | 0.0081 | 74.56 |
| 12 | 94738331  | rs7134181  | C | T | 4 | 0.01541   | 0.2036 | 0.9097 | 0.9241 | 0.1087 | 50.5  |
| 2  | 30846381  | rs17324843 | A | G | 4 | 0.0002913 | 0.204  | 0.8751 | 0.9132 | 0.0316 | 66.03 |
| 7  | 84684755  | rs2732742  | A | G | 4 | 0.1075    | 0.204  | 0.9365 | 0.8948 | 0.0128 | 72.26 |
| 20 | 924269    | rs6056488  | A | G | 3 | 0.04088   | 0.2041 | 0.7977 | 0.7043 | 0.0135 | 76.77 |
| 3  | 63499138  | rs12054371 | C | T | 4 | 0.0005025 | 0.2042 | 1.1765 | 1.1245 | 0.028  | 67.03 |
| 16 | 6607296   | rs17664315 | G | T | 4 | 0.006629  | 0.2054 | 1.1015 | 1.1004 | 0.0149 | 71.37 |
| 11 | 81037775  | rs17142733 | A | G | 4 | 0.2665    | 0.2056 | 0.9553 | 0.8884 | 0.0061 | 75.84 |
| 7  | 84680820  | rs2732744  | C | T | 4 | 0.1061    | 0.206  | 1.0681 | 1.1161 | 0.0139 | 71.79 |
| 2  | 115891622 | rs843390   | C | G | 4 | 0.2273    | 0.2061 | 1.0752 | 1.2262 | 0.0004 | 83.7  |
| 10 | 19333212  | rs10763789 | C | G | 4 | 0.00452   | 0.2061 | 1.1444 | 1.11   | 0.064  | 58.68 |
| 2  | 115904553 | rs843394   | G | T | 4 | 0.2265    | 0.2065 | 1.0754 | 1.2259 | 0.0004 | 83.68 |
| 10 | 85961327  | rs4933978  | A | G | 4 | 0.02362   | 0.2067 | 0.9146 | 0.9122 | 0.0495 | 61.73 |
| 11 | 106690064 | rs10789607 | C | T | 3 | 0.08739   | 0.2073 | 0.7769 | 0.6077 | 0.0037 | 82.16 |
| 18 | 37292163  | rs11874148 | C | T | 4 | 0.1256    | 0.2074 | 0.9438 | 0.8984 | 0.0073 | 75.06 |
| 17 | 24442232  | rs4965417  | C | T | 4 | 0.2694    | 0.2076 | 0.9618 | 0.9079 | 0.0115 | 72.85 |
| 10 | 6933270   | rs1013250  | A | G | 4 | 0.04051   | 0.2079 | 1.2518 | 1.3041 | 0.0303 | 66.38 |
| 4  | 154185069 | rs2406144  | C | T | 4 | 0.008398  | 0.208  | 1.1023 | 1.1005 | 0.0207 | 69.28 |
| 6  | 25277765  | rs16890179 | C | T | 4 | 0.008509  | 0.2082 | 0.888  | 0.9131 | 0.1094 | 50.37 |
| 2  | 219216616 | rs3770213  | A | T | 3 | 0.1727    | 0.2083 | 1.052  | 1.1215 | 0.0078 | 79.42 |
| 5  | 25900515  | rs11949113 | G | T | 4 | 0.456     | 0.2083 | 1.0282 | 1.1319 | 0.0009 | 81.7  |
| 10 | 131545202 | rs4751138  | C | T | 4 | 0.01459   | 0.2084 | 1.1017 | 1.0838 | 0.1002 | 51.98 |
| 12 | 94722758  | rs12582105 | A | G | 4 | 0.01655   | 0.2086 | 1.0981 | 1.0817 | 0.1057 | 51.03 |
| 2  | 115974128 | rs6712054  | C | T | 4 | 0.2669    | 0.2087 | 0.9362 | 0.8332 | 0.0017 | 80.12 |

|    |           |            |   |   |   |          |        |        |        |        |       |
|----|-----------|------------|---|---|---|----------|--------|--------|--------|--------|-------|
| 10 | 30338084  | rs1418278  | A | G | 4 | 0.0228   | 0.2087 | 0.9237 | 0.9303 | 0.091  | 53.61 |
| 16 | 53802538  | rs17291845 | A | G | 4 | 0.009472 | 0.2091 | 1.1417 | 1.1486 | 0.0126 | 72.34 |
| 17 | 24570756  | rs727999   | A | G | 4 | 0.3626   | 0.2091 | 0.9665 | 0.8937 | 0.004  | 77.49 |
| 10 | 30336364  | rs4749520  | A | G | 4 | 0.0216   | 0.2093 | 1.0839 | 1.0747 | 0.0947 | 52.95 |
| 17 | 24438034  | rs4795495  | C | G | 4 | 0.2685   | 0.2093 | 0.9617 | 0.9085 | 0.0118 | 72.68 |
| 20 | 24128615  | rs224159   | C | T | 3 | 0.06828  | 0.2093 | 0.7688 | 0.6499 | 0.0135 | 76.78 |
| 6  | 90708506  | rs210052   | C | T | 4 | 0.1053   | 0.2104 | 0.9416 | 0.9008 | 0.0091 | 74.01 |
| 16 | 70636408  | rs1424241  | A | G | 4 | 0.01418  | 0.2107 | 0.8935 | 0.9023 | 0.0605 | 59.4  |
| 17 | 24488142  | rs1388175  | A | C | 4 | 0.2685   | 0.2107 | 0.9617 | 0.9067 | 0.0093 | 73.92 |
| 2  | 37367267  | rs10181140 | G | T | 4 | 0.2576   | 0.2108 | 1.0488 | 1.1256 | 0.0085 | 74.36 |
| 5  | 25905847  | rs1366465  | C | T | 4 | 0.4694   | 0.2109 | 1.0271 | 1.1299 | 0.001  | 81.63 |
| 9  | 133647911 | rs7851410  | C | T | 4 | 0.2697   | 0.2109 | 1.042  | 1.1225 | 0.0026 | 78.89 |
| 2  | 128337564 | rs1045832  | A | G | 4 | 0.008999 | 0.2111 | 0.9111 | 0.9182 | 0.0361 | 64.86 |
| 5  | 26041000  | rs6880807  | G | T | 4 | 0.565    | 0.2113 | 1.0217 | 1.1386 | 0.0003 | 83.91 |
| 18 | 37367434  | rs2848768  | C | T | 4 | 0.1503   | 0.2113 | 0.9481 | 0.9119 | 0.0251 | 67.89 |
| 20 | 55505059  | rs2182970  | G | T | 3 | 0.01217  | 0.2114 | 0.9122 | 0.9189 | 0.0593 | 64.6  |
| 5  | 25900953  | rs11949195 | A | T | 4 | 0.4832   | 0.2115 | 0.9744 | 0.8844 | 0.0009 | 81.84 |
| 2  | 229868406 | rs1419948  | A | C | 4 | 0.01439  | 0.2121 | 0.848  | 0.8577 | 0.0523 | 61.1  |
| 5  | 25906087  | rs12658597 | C | T | 4 | 0.4755   | 0.2121 | 0.9739 | 0.8855 | 0.001  | 81.56 |
| 9  | 133647188 | rs10793897 | C | T | 4 | 0.2644   | 0.2121 | 0.9588 | 0.8916 | 0.0031 | 78.39 |
| 1  | 74229988  | rs2343194  | A | G | 4 | 0.359    | 0.2122 | 0.9667 | 0.8961 | 0.004  | 77.47 |
| 12 | 130855942 | rs12319878 | C | T | 4 | 0.02159  | 0.2123 | 0.9216 | 0.9321 | 0.1117 | 49.99 |
| 12 | 94738697  | rs12366571 | A | C | 4 | 0.009252 | 0.2127 | 0.9048 | 0.9228 | 0.0831 | 55.04 |
| 6  | 116094037 | rs9387353  | C | T | 4 | 0.02385  | 0.2129 | 0.9059 | 0.8923 | 0.0141 | 71.69 |
| 2  | 128338961 | rs13411546 | A | G | 4 | 0.01212  | 0.2131 | 1.0936 | 1.0856 | 0.0469 | 62.3  |
| 1  | 215512121 | rs6604542  | A | G | 4 | 0.08472  | 0.2133 | 0.9419 | 0.9196 | 0.0304 | 66.36 |
| 5  | 13536969  | rs3915771  | A | G | 4 | 0.01919  | 0.2133 | 0.9207 | 0.9304 | 0.0946 | 52.97 |
| 17 | 24474102  | rs882729   | C | T | 4 | 0.2808   | 0.2135 | 1.0391 | 1.1024 | 0.0096 | 73.75 |
| 1  | 225275244 | rs2104861  | C | T | 4 | 0.01766  | 0.2136 | 0.9186 | 0.8981 | 0.0038 | 77.66 |
| 17 | 24548368  | rs4965978  | C | T | 4 | 0.2843   | 0.2136 | 1.0386 | 1.1072 | 0.0058 | 76.05 |
| 3  | 124852418 | rs1254389  | A | T | 4 | 0.007698 | 0.2137 | 1.2223 | 1.2156 | 0.0125 | 72.37 |
| 7  | 84683866  | rs2732743  | C | T | 4 | 0.1117   | 0.214  | 1.0673 | 1.1157 | 0.0125 | 72.36 |
| 1  | 215512946 | rs10863316 | C | T | 4 | 0.08539  | 0.2141 | 1.0616 | 1.0872 | 0.0306 | 66.3  |
| 17 | 24474555  | rs7219630  | A | G | 4 | 0.2812   | 0.2144 | 0.9624 | 0.9074 | 0.0096 | 73.74 |
| 3  | 116985171 | rs2972491  | A | G | 4 | 0.002151 | 0.2145 | 0.8413 | 0.8887 | 0.0802 | 55.57 |
| 2  | 128341634 | rs7572242  | C | T | 4 | 0.01117  | 0.2148 | 0.9135 | 0.9188 | 0.0364 | 64.79 |
| 2  | 115890266 | rs843393   | A | G | 4 | 0.2558   | 0.2149 | 1.0706 | 1.2226 | 0.0003 | 83.86 |

|    |           |            |   |   |   |           |        |        |        |        |       |
|----|-----------|------------|---|---|---|-----------|--------|--------|--------|--------|-------|
| 1  | 215513296 | rs10863317 | A | C | 4 | 0.08667   | 0.2153 | 0.9422 | 0.9198 | 0.0302 | 66.42 |
| 11 | 113509338 | rs12278218 | C | T | 4 | 0.1063    | 0.2153 | 0.9078 | 0.8664 | 0.0281 | 67    |
| 2  | 30858988  | rs6548034  | A | G | 4 | 0.003309  | 0.2156 | 1.1099 | 1.0783 | 0.0726 | 57.01 |
| 6  | 87197144  | rs9362322  | A | T | 4 | 0.01358   | 0.2158 | 1.1201 | 1.1164 | 0.03   | 66.47 |
| 21 | 40052396  | rs4816652  | C | T | 4 | 0.02256   | 0.216  | 0.9171 | 0.9239 | 0.0778 | 56.03 |
| 6  | 40754017  | rs7759444  | A | G | 4 | 0.01052   | 0.217  | 1.1167 | 1.126  | 0.0094 | 73.86 |
| 1  | 215519038 | rs6604543  | A | G | 4 | 0.0844    | 0.2171 | 0.9418 | 0.9187 | 0.026  | 67.6  |
| 2  | 229880420 | rs1226954  | C | T | 4 | 0.02191   | 0.2174 | 0.8511 | 0.8491 | 0.0399 | 63.94 |
| 1  | 74218172  | rs10890101 | C | T | 4 | 0.3996    | 0.2177 | 0.9701 | 0.892  | 0.0013 | 80.86 |
| 17 | 24532830  | rs8080958  | A | T | 4 | 0.2937    | 0.2178 | 1.0378 | 1.1067 | 0.0053 | 76.38 |
| 2  | 113514036 | rs1900287  | A | G | 4 | 0.007337  | 0.218  | 0.9049 | 0.9196 | 0.0507 | 61.47 |
| 2  | 115885861 | rs1402446  | A | G | 4 | 0.2639    | 0.2181 | 0.9345 | 0.8181 | 0.0004 | 83.76 |
| 2  | 115885270 | rs1717040  | C | T | 4 | 0.265     | 0.2184 | 1.0699 | 1.2221 | 0.0004 | 83.76 |
| 6  | 116111190 | rs9374562  | C | T | 4 | 0.07844   | 0.2188 | 0.9333 | 0.9063 | 0.0202 | 69.42 |
| 8  | 54312587  | rs16918909 | A | G | 4 | 0.009957  | 0.2189 | 1.1683 | 1.1265 | 0.1008 | 51.86 |
| 2  | 30855725  | rs4952181  | A | T | 4 | 0.0001408 | 0.2191 | 0.8701 | 0.9132 | 0.0228 | 68.57 |
| 14 | 31527434  | rs1952969  | G | T | 4 | 0.01832   | 0.2195 | 0.9026 | 0.9065 | 0.0441 | 62.93 |
| 3  | 178788491 | rs539967   | A | C | 4 | 0.01636   | 0.2196 | 1.0927 | 1.0834 | 0.0618 | 59.14 |
| 2  | 30860228  | rs6548036  | C | G | 4 | 0.000129  | 0.2197 | 1.1571 | 1.101  | 0.0186 | 69.99 |
| 6  | 6097407   | rs3024457  | A | C | 4 | 0.01802   | 0.2197 | 1.1148 | 1.0935 | 0.1126 | 49.82 |
| 11 | 113508557 | rs10488696 | A | G | 4 | 0.1143    | 0.2199 | 1.1002 | 1.1536 | 0.0284 | 66.92 |
| 18 | 37366392  | rs2848766  | A | G | 4 | 0.1634    | 0.22   | 1.0529 | 1.0956 | 0.0233 | 68.44 |
| 18 | 37366646  | rs2848767  | C | T | 4 | 0.1634    | 0.22   | 1.0529 | 1.0956 | 0.0233 | 68.44 |
| 6  | 116092185 | rs12205135 | C | G | 4 | 0.0265    | 0.2202 | 1.1026 | 1.1196 | 0.0137 | 71.85 |
| 2  | 115959914 | rs10496495 | C | T | 4 | 0.2721    | 0.2207 | 1.0682 | 1.2128 | 0.0005 | 82.9  |
| 2  | 229871291 | rs1226973  | A | C | 4 | 0.01663   | 0.221  | 0.851  | 0.8601 | 0.0521 | 61.14 |
| 7  | 69842984  | rs7777347  | A | G | 4 | 0.1929    | 0.2211 | 0.9552 | 0.9094 | 0.0097 | 73.71 |
| 11 | 15157736  | rs10160390 | C | T | 4 | 0.1866    | 0.2212 | 1.0488 | 1.0982 | 0.0153 | 71.21 |
| 1  | 215513377 | rs10863318 | A | G | 4 | 0.09276   | 0.2213 | 0.9433 | 0.9206 | 0.0295 | 66.61 |
| 2  | 229875214 | rs17257436 | A | G | 4 | 0.01751   | 0.2219 | 0.8527 | 0.8617 | 0.0549 | 60.56 |
| 18 | 37363038  | rs2703176  | C | T | 4 | 0.1666    | 0.222  | 1.0525 | 1.0953 | 0.023  | 68.54 |
| 18 | 37364633  | rs2587615  | C | T | 4 | 0.1666    | 0.222  | 1.0525 | 1.0953 | 0.023  | 68.54 |
| 18 | 37365020  | rs2612344  | C | T | 4 | 0.1666    | 0.222  | 1.0525 | 1.0953 | 0.023  | 68.54 |
| 4  | 154187592 | rs908535   | A | G | 4 | 0.008781  | 0.2221 | 0.9076 | 0.9112 | 0.0206 | 69.3  |
| 1  | 215518894 | rs4846404  | A | G | 4 | 0.08814   | 0.2222 | 0.9425 | 0.9201 | 0.0272 | 67.26 |
| 18 | 37365054  | rs2612343  | C | T | 4 | 0.1674    | 0.2224 | 0.9502 | 0.9128 | 0.0224 | 68.7  |
| 20 | 925164    | rs6056491  | A | G | 4 | 0.05936   | 0.2224 | 0.8664 | 0.8119 | 0.0072 | 75.12 |

|    |           |            |   |   |   |           |        |        |        |        |       |
|----|-----------|------------|---|---|---|-----------|--------|--------|--------|--------|-------|
| 1  | 215514615 | rs11117833 | C | T | 4 | 0.09157   | 0.2227 | 1.0604 | 1.0872 | 0.0264 | 67.49 |
| 6  | 94799746  | rs679881   | A | G | 4 | 0.0001534 | 0.2232 | 1.1493 | 1.0914 | 0.0329 | 65.7  |
| 12 | 49895867  | rs6580809  | C | T | 4 | 0.01644   | 0.2239 | 0.9145 | 0.9189 | 0.0428 | 63.24 |
| 2  | 113506112 | rs6724667  | A | G | 4 | 0.009232  | 0.2241 | 0.9042 | 0.9158 | 0.0436 | 63.06 |
| 1  | 215514042 | rs12074981 | C | T | 4 | 0.09334   | 0.2242 | 0.9434 | 0.9209 | 0.029  | 66.76 |
| 1  | 215517984 | rs6666935  | C | T | 4 | 0.09016   | 0.2242 | 0.9429 | 0.9204 | 0.027  | 67.33 |
| 6  | 94778822  | rs4707818  | C | G | 4 | 0.00588   | 0.2242 | 0.9072 | 0.9319 | 0.0961 | 52.69 |
| 10 | 26606462  | rs11015025 | C | T | 3 | 0.002794  | 0.2242 | 1.2034 | 1.1526 | 0.0569 | 65.1  |
| 12 | 60689368  | rs980891   | C | T | 4 | 0.1557    | 0.2244 | 0.9435 | 0.903  | 0.0176 | 70.33 |
| 12 | 65684056  | rs11176528 | C | T | 4 | 0.1304    | 0.2244 | 1.0887 | 1.16   | 0.0101 | 73.5  |
| 1  | 180321600 | rs3856106  | C | T | 4 | 0.3141    | 0.2246 | 1.0386 | 1.1241 | 0.0017 | 80.16 |
| 8  | 135194786 | rs1457473  | A | G | 4 | 0.008655  | 0.2248 | 1.0959 | 1.0821 | 0.0433 | 63.13 |
| 1  | 23097909  | rs309543   | A | G | 4 | 0.01259   | 0.225  | 1.0945 | 1.0737 | 0.1012 | 51.8  |
| 1  | 215516984 | rs7532623  | C | T | 4 | 0.09391   | 0.225  | 1.0599 | 1.0858 | 0.0287 | 66.84 |
| 2  | 115970570 | rs17362720 | A | G | 4 | 0.2922    | 0.2252 | 1.0646 | 1.1874 | 0.0026 | 78.9  |
| 2  | 30859743  | rs11675229 | C | T | 4 | 0.00362   | 0.2253 | 1.1108 | 1.0791 | 0.066  | 58.29 |
| 12 | 65692893  | rs992738   | C | T | 4 | 0.1151    | 0.2255 | 0.9152 | 0.8612 | 0.0093 | 73.89 |
| 3  | 15090727  | rs9851219  | C | T | 3 | 0.09967   | 0.2258 | 1.1457 | 1.2943 | 0.0027 | 83.07 |
| 18 | 37362872  | rs2703183  | A | T | 4 | 0.1697    | 0.2258 | 0.9504 | 0.9133 | 0.0224 | 68.73 |
| 6  | 41404395  | rs13208606 | A | G | 4 | 0.01118   | 0.2259 | 0.9145 | 0.9147 | 0.0165 | 70.77 |
| 7  | 69839751  | rs10270627 | G | T | 4 | 0.1762    | 0.2259 | 1.0488 | 1.0977 | 0.0106 | 73.28 |
| 2  | 229868477 | rs1419947  | A | G | 4 | 0.01588   | 0.2263 | 0.85   | 0.8596 | 0.047  | 62.27 |
| 2  | 229877443 | rs1226959  | A | C | 4 | 0.01819   | 0.2263 | 0.8525 | 0.86   | 0.0499 | 61.64 |
| 12 | 65682486  | rs11176527 | A | G | 4 | 0.1336    | 0.2266 | 1.0875 | 1.1543 | 0.0132 | 72.1  |
| 2  | 115894049 | rs843385   | C | T | 4 | 0.296     | 0.2269 | 1.0648 | 1.2181 | 0.0003 | 84.11 |
| 2  | 17248139  | rs12467252 | C | T | 4 | 0.2446    | 0.2271 | 0.9576 | 0.907  | 0.0129 | 72.21 |
| 1  | 215514427 | rs12059973 | C | T | 4 | 0.09673   | 0.2272 | 1.0594 | 1.0853 | 0.0289 | 66.77 |
| 16 | 64006980  | rs17439546 | C | T | 4 | 0.224     | 0.2273 | 0.9222 | 0.844  | 0.0097 | 73.71 |
| 13 | 41468201  | rs11619622 | A | G | 4 | 0.04708   | 0.2274 | 0.9324 | 0.9154 | 0.0181 | 70.18 |
| 14 | 31528650  | rs10143992 | C | G | 4 | 0.01932   | 0.2277 | 1.107  | 1.1023 | 0.0415 | 63.53 |
| 1  | 215509686 | rs4436446  | C | T | 4 | 0.09216   | 0.228  | 0.9432 | 0.9212 | 0.0282 | 66.97 |
| 21 | 40052413  | rs4816653  | C | T | 4 | 0.02308   | 0.2281 | 0.9186 | 0.9264 | 0.0755 | 56.45 |
| 16 | 64006260  | rs10500520 | A | G | 4 | 0.2274    | 0.2283 | 0.923  | 0.8442 | 0.0093 | 73.9  |
| 6  | 15948412  | rs16877105 | A | G | 4 | 0.02207   | 0.2286 | 1.1244 | 1.111  | 0.0742 | 56.71 |
| 12 | 60709833  | rs348692   | A | G | 4 | 0.1459    | 0.2287 | 1.0605 | 1.1007 | 0.025  | 67.9  |
| 18 | 44768190  | rs2635509  | A | G | 4 | 0.3941    | 0.2289 | 1.031  | 1.1252 | 0.0005 | 83.21 |
| 2  | 229868175 | rs1922458  | A | G | 4 | 0.01623   | 0.2293 | 0.8505 | 0.8602 | 0.0463 | 62.43 |

|    |           |            |   |   |   |           |        |        |        |        |       |
|----|-----------|------------|---|---|---|-----------|--------|--------|--------|--------|-------|
| 22 | 23875909  | rs875352   | C | G | 4 | 0.2818    | 0.2296 | 0.9582 | 0.9017 | 0.0123 | 72.46 |
| 2  | 30860140  | rs17010271 | C | T | 4 | 0.003626  | 0.2298 | 1.1109 | 1.0788 | 0.0641 | 58.66 |
| 6  | 80193185  | rs3846739  | A | G | 4 | 0.02927   | 0.2299 | 1.1172 | 1.1411 | 0.0116 | 72.79 |
| 14 | 31530235  | rs10483393 | C | T | 4 | 0.01867   | 0.2304 | 0.9028 | 0.9071 | 0.0397 | 63.99 |
| 9  | 133646531 | rs11243525 | A | T | 4 | 0.2843    | 0.2305 | 0.9605 | 0.8954 | 0.0031 | 78.37 |
| 11 | 41016901  | rs996263   | A | T | 4 | 0.02861   | 0.2307 | 1.2414 | 1.2273 | 0.0654 | 58.42 |
| 17 | 24573932  | rs9900880  | A | G | 4 | 0.3976    | 0.2307 | 0.9689 | 0.8994 | 0.0045 | 77.01 |
| 22 | 23876617  | rs9624730  | C | T | 4 | 0.2851    | 0.2309 | 1.0433 | 1.1086 | 0.0125 | 72.4  |
| 12 | 17411380  | rs2936206  | A | G | 4 | 0.01174   | 0.231  | 1.0918 | 1.0721 | 0.0861 | 54.5  |
| 16 | 64011536  | rs17530421 | C | T | 4 | 0.2324    | 0.231  | 0.9238 | 0.8459 | 0.01   | 73.57 |
| 20 | 19740762  | rs6136840  | C | G | 4 | 0.06276   | 0.2314 | 0.8935 | 0.8553 | 0.0094 | 73.88 |
| 2  | 113507953 | rs2862772  | C | G | 4 | 0.007018  | 0.2317 | 0.9095 | 0.9281 | 0.06   | 59.51 |
| 4  | 154482001 | rs6535914  | C | T | 4 | 0.4875    | 0.2319 | 1.027  | 1.1294 | 0.0007 | 82.4  |
| 1  | 215514934 | rs11117836 | G | T | 4 | 0.1019    | 0.2321 | 1.0584 | 1.0846 | 0.0283 | 66.94 |
| 6  | 94785340  | rs582835   | C | T | 4 | 0.0001174 | 0.2324 | 0.868  | 0.9163 | 0.0277 | 67.1  |
| 22 | 23878986  | rs9624734  | C | T | 4 | 0.2898    | 0.2324 | 1.0428 | 1.1082 | 0.0124 | 72.43 |
| 11 | 81032483  | rs1540176  | C | T | 4 | 0.2533    | 0.2328 | 0.9581 | 0.9091 | 0.0157 | 71.06 |
| 2  | 17251771  | rs13031560 | C | T | 4 | 0.2626    | 0.2333 | 1.0426 | 1.1019 | 0.012  | 72.61 |
| 2  | 17250287  | rs11898524 | C | T | 4 | 0.2629    | 0.2335 | 1.0425 | 1.1017 | 0.0122 | 72.49 |
| 21 | 40057208  | rs2837183  | C | T | 4 | 0.0233    | 0.2335 | 1.0884 | 1.0791 | 0.0717 | 57.18 |
| 22 | 23879405  | rs9624735  | A | G | 4 | 0.2929    | 0.2336 | 0.9592 | 0.9026 | 0.0124 | 72.4  |
| 2  | 30858801  | rs4597574  | C | T | 4 | 0.003313  | 0.2341 | 0.9017 | 0.9294 | 0.0658 | 58.33 |
| 12 | 45757706  | rs2269828  | A | G | 3 | 0.0001301 | 0.2342 | 0.8505 | 0.8973 | 0.0215 | 73.97 |
| 2  | 17250643  | rs11893015 | C | T | 4 | 0.2668    | 0.2347 | 0.9595 | 0.9078 | 0.012  | 72.59 |
| 1  | 173288830 | rs12409660 | C | G | 4 | 0.1366    | 0.235  | 1.0613 | 1.1324 | 0.0009 | 81.76 |
| 2  | 113514395 | rs2862776  | A | G | 4 | 0.008244  | 0.235  | 0.9062 | 0.9211 | 0.0452 | 62.69 |
| 3  | 59333230  | rs11130703 | C | T | 4 | 0.0004337 | 0.2357 | 1.1421 | 1.0918 | 0.0292 | 66.7  |
| 2  | 17263221  | rs7419572  | A | G | 4 | 0.2683    | 0.2358 | 1.042  | 1.1018 | 0.0115 | 72.82 |
| 2  | 116082577 | rs17454262 | C | T | 4 | 0.2767    | 0.2358 | 1.0723 | 1.1977 | 0.0028 | 78.69 |
| 12 | 65718923  | rs7955793  | A | G | 4 | 0.1948    | 0.2358 | 1.0681 | 1.1462 | 0.0061 | 75.81 |
| 20 | 19742718  | rs6136842  | C | G | 4 | 0.06698   | 0.2359 | 0.8951 | 0.8572 | 0.0099 | 73.63 |
| 1  | 173301266 | rs10912878 | A | T | 4 | 0.144     | 0.236  | 0.943  | 0.8832 | 0.0009 | 81.78 |
| 22 | 23885789  | rs6004454  | A | G | 4 | 0.2991    | 0.236  | 0.9597 | 0.9033 | 0.0128 | 72.25 |
| 2  | 229875567 | rs16825971 | C | T | 4 | 0.01927   | 0.2366 | 0.8548 | 0.8637 | 0.0492 | 61.78 |
| 6  | 94792276  | rs1488324  | A | G | 4 | 0.0003618 | 0.2366 | 1.1413 | 1.0863 | 0.0423 | 63.35 |
| 6  | 94789896  | rs1586510  | C | T | 4 | 0.0001415 | 0.2368 | 1.1501 | 1.0901 | 0.0285 | 66.88 |
| 6  | 90708821  | rs210051   | A | G | 4 | 0.1354    | 0.2369 | 1.0574 | 1.1094 | 0.005  | 76.6  |

|    |           |            |   |   |   |           |        |        |        |        |       |
|----|-----------|------------|---|---|---|-----------|--------|--------|--------|--------|-------|
| 8  | 19199623  | rs1514708  | C | G | 4 | 0.2221    | 0.2369 | 1.1008 | 1.2074 | 0.0181 | 70.16 |
| 6  | 94800718  | rs1463678  | A | G | 4 | 0.0001952 | 0.2371 | 1.1468 | 1.089  | 0.0317 | 66    |
| 13 | 43934565  | rs9595128  | A | G | 4 | 0.1239    | 0.2371 | 1.0565 | 1.0945 | 0.0142 | 71.64 |
| 10 | 30437462  | rs17295031 | A | G | 4 | 0.0008664 | 0.2372 | 0.8832 | 0.9243 | 0.0605 | 59.4  |
| 22 | 23875612  | rs875353   | A | G | 4 | 0.3051    | 0.2373 | 0.9602 | 0.903  | 0.012  | 72.61 |
| 2  | 17262933  | rs1519969  | A | T | 4 | 0.2732    | 0.2375 | 1.0416 | 1.1014 | 0.0115 | 72.85 |
| 22 | 23890601  | rs16979684 | A | C | 4 | 0.3056    | 0.2376 | 1.0412 | 1.1062 | 0.0126 | 72.32 |
| 2  | 17262967  | rs1519968  | A | C | 4 | 0.2733    | 0.2377 | 0.9601 | 0.908  | 0.0116 | 72.8  |
| 2  | 17263402  | rs16983357 | C | G | 4 | 0.2735    | 0.2377 | 1.0416 | 1.1015 | 0.0113 | 72.9  |
| 2  | 17263810  | rs2030358  | C | T | 4 | 0.2735    | 0.2377 | 1.0416 | 1.1015 | 0.0113 | 72.9  |
| 2  | 17263874  | rs2030357  | A | G | 4 | 0.2733    | 0.2377 | 0.9601 | 0.908  | 0.0116 | 72.8  |
| 12 | 94729110  | rs10859956 | C | T | 4 | 0.01947   | 0.2377 | 1.0955 | 1.0784 | 0.0938 | 53.11 |
| 1  | 159363865 | rs12727614 | A | T | 4 | 0.08523   | 0.2383 | 1.0691 | 1.0982 | 0.0198 | 69.58 |
| 2  | 17265222  | rs11677772 | G | T | 4 | 0.2743    | 0.2387 | 0.9601 | 0.9082 | 0.0116 | 72.8  |
| 2  | 17266477  | rs1507986  | C | T | 4 | 0.2743    | 0.2387 | 0.9601 | 0.9082 | 0.0116 | 72.8  |
| 2  | 17267063  | rs2174865  | C | G | 4 | 0.2743    | 0.2387 | 0.9601 | 0.9082 | 0.0116 | 72.8  |
| 2  | 30855109  | rs17010264 | C | G | 4 | 0.0001856 | 0.2387 | 0.8722 | 0.9158 | 0.021  | 69.18 |
| 2  | 30861183  | rs6754455  | C | T | 4 | 0.004346  | 0.2387 | 1.1111 | 1.0801 | 0.0573 | 60.06 |
| 11 | 15188429  | rs16931216 | A | G | 4 | 0.1091    | 0.2387 | 0.856  | 0.7879 | 0.0123 | 72.48 |
| 2  | 30860893  | rs2090734  | A | T | 4 | 0.003954  | 0.2389 | 1.1115 | 1.0797 | 0.0573 | 60.05 |
| 22 | 23880247  | rs6004449  | A | G | 4 | 0.3105    | 0.2389 | 1.0407 | 1.1061 | 0.0124 | 72.42 |
| 5  | 28990579  | rs17583873 | C | T | 4 | 0.04911   | 0.239  | 1.0885 | 1.1221 | 0.0065 | 75.58 |
| 2  | 17263551  | rs11693140 | A | T | 4 | 0.2783    | 0.2394 | 0.9605 | 0.9083 | 0.0115 | 72.84 |
| 2  | 107772978 | rs7569095  | C | G | 3 | 0.009653  | 0.2394 | 1.1095 | 1.0868 | 0.0768 | 61.05 |
| 10 | 85956301  | rs7084853  | A | G | 4 | 0.03483   | 0.2398 | 1.0882 | 1.0946 | 0.0372 | 64.6  |
| 1  | 215516242 | rs6675347  | C | T | 4 | 0.1105    | 0.2399 | 1.057  | 1.0835 | 0.0274 | 67.2  |
| 1  | 215516892 | rs7540354  | A | G | 4 | 0.1109    | 0.2401 | 1.0569 | 1.0833 | 0.0278 | 67.08 |
| 2  | 17264870  | rs11673738 | A | T | 4 | 0.2794    | 0.2403 | 1.0411 | 1.1009 | 0.0113 | 72.93 |
| 20 | 55503911  | rs6025590  | A | G | 4 | 0.01783   | 0.2407 | 1.0881 | 1.0734 | 0.0809 | 55.45 |
| 13 | 43946832  | rs9595132  | A | G | 4 | 0.1318    | 0.2413 | 1.0553 | 1.094  | 0.0137 | 71.87 |
| 6  | 90702947  | rs292251   | A | G | 4 | 0.151     | 0.2417 | 1.0552 | 1.1056 | 0.0067 | 75.42 |
| 2  | 219247043 | rs7604319  | A | C | 4 | 0.1681    | 0.242  | 1.0506 | 1.0965 | 0.0112 | 72.99 |
| 2  | 17267310  | rs13020402 | C | T | 4 | 0.2843    | 0.2421 | 0.9609 | 0.9087 | 0.0114 | 72.87 |
| 13 | 43922370  | rs12583155 | C | T | 4 | 0.1311    | 0.2421 | 0.9475 | 0.9147 | 0.0144 | 71.59 |
| 6  | 87194834  | rs9351097  | G | T | 4 | 0.01937   | 0.2424 | 0.8959 | 0.9017 | 0.0379 | 64.4  |
| 10 | 6924140   | rs17400327 | C | T | 4 | 0.0459    | 0.2426 | 0.8088 | 0.7787 | 0.0203 | 69.41 |
| 10 | 9906737   | rs7913128  | A | G | 4 | 0.1708    | 0.2427 | 0.9301 | 0.8837 | 0.023  | 68.53 |



|    |           |            |   |   |   |           |        |        |        |        |       |
|----|-----------|------------|---|---|---|-----------|--------|--------|--------|--------|-------|
| 7  | 146666000 | rs826802   | G | T | 4 | 0.2019    | 0.243  | 1.0489 | 1.0951 | 0.0193 | 69.74 |
| 1  | 66628614  | rs12406429 | A | G | 4 | 0.01931   | 0.2433 | 0.8487 | 0.8766 | 0.102  | 51.66 |
| 11 | 23653839  | rs12279140 | A | C | 3 | 0.2059    | 0.2435 | 1.1805 | 1.7585 | 0.0046 | 81.4  |
| 6  | 90703875  | rs292250   | A | G | 4 | 0.153     | 0.2436 | 1.0549 | 1.1059 | 0.0061 | 75.84 |
| 12 | 114340512 | rs11067588 | C | G | 4 | 0.006991  | 0.2437 | 1.1184 | 1.0894 | 0.0572 | 60.07 |
| 19 | 37368199  | rs4334417  | A | G | 4 | 0.4456    | 0.2437 | 0.9721 | 0.9039 | 0.0045 | 77.01 |
| 21 | 40054047  | rs9983659  | C | T | 4 | 0.02547   | 0.2437 | 1.087  | 1.0777 | 0.0696 | 57.59 |
| 13 | 89489076  | rs9583770  | A | G | 4 | 0.02489   | 0.244  | 0.906  | 0.9216 | 0.1042 | 51.28 |
| 22 | 23890579  | rs16979683 | A | C | 4 | 0.3256    | 0.244  | 1.0395 | 1.105  | 0.0123 | 72.46 |
| 2  | 17260029  | rs10495660 | G | T | 4 | 0.2933    | 0.2442 | 1.0399 | 1.1002 | 0.0111 | 73    |
| 2  | 38458897  | rs3806552  | A | C | 3 | 0.2514    | 0.2443 | 1.0438 | 1.1243 | 0.0025 | 83.3  |
| 22 | 23885948  | rs6004456  | A | G | 4 | 0.2878    | 0.2443 | 0.9582 | 0.9051 | 0.0147 | 71.44 |
| 2  | 113516520 | rs4849144  | A | G | 4 | 0.009134  | 0.2454 | 1.102  | 1.0843 | 0.0432 | 63.15 |
| 11 | 81039404  | rs17142744 | G | T | 4 | 0.318     | 0.2454 | 1.0418 | 1.1111 | 0.0081 | 74.56 |
| 2  | 229865352 | rs11678426 | A | G | 4 | 0.01713   | 0.2455 | 1.1741 | 1.1575 | 0.0442 | 62.91 |
| 6  | 15947234  | rs4716002  | G | T | 4 | 0.0245    | 0.2457 | 0.8917 | 0.9011 | 0.0618 | 59.14 |
| 6  | 94825178  | rs1416058  | A | T | 4 | 0.0001861 | 0.2459 | 1.1483 | 1.0894 | 0.027  | 67.31 |
| 13 | 43928799  | rs4942331  | C | T | 4 | 0.1396    | 0.2461 | 1.0542 | 1.0925 | 0.0142 | 71.64 |
| 1  | 159370069 | rs10797093 | G | T | 4 | 0.08206   | 0.2462 | 1.0678 | 1.1024 | 0.0086 | 74.28 |
| 6  | 90704480  | rs182382   | C | G | 4 | 0.1541    | 0.2463 | 1.0543 | 1.1049 | 0.0059 | 75.94 |
| 2  | 38220587  | rs10469900 | C | T | 4 | 0.00564   | 0.2464 | 1.1246 | 1.0957 | 0.0447 | 62.81 |
| 6  | 99029526  | rs9482753  | A | G | 4 | 0.00128   | 0.2464 | 1.3661 | 1.2491 | 0.0205 | 69.33 |
| 5  | 149561777 | rs2240785  | C | T | 4 | 0.01561   | 0.2467 | 1.2696 | 1.2327 | 0.0471 | 62.27 |
| 7  | 69846869  | rs7806434  | A | G | 4 | 0.1915    | 0.2467 | 0.9551 | 0.9142 | 0.0098 | 73.64 |
| 16 | 75607795  | rs2220233  | C | T | 4 | 0.2832    | 0.2468 | 0.9581 | 0.9063 | 0.0165 | 70.75 |
| 4  | 116454363 | rs6533850  | A | T | 4 | 0.2479    | 0.2469 | 0.9596 | 0.9058 | 0.0034 | 78.02 |
| 6  | 15948658  | rs16877108 | A | G | 4 | 0.02598   | 0.247  | 0.8932 | 0.902  | 0.0631 | 58.87 |
| 1  | 215504627 | rs6604663  | A | G | 4 | 0.1345    | 0.2472 | 0.9497 | 0.9242 | 0.0269 | 67.35 |
| 5  | 28895838  | rs17616969 | A | G | 4 | 0.05466   | 0.2472 | 0.9211 | 0.8904 | 0.0043 | 77.2  |
| 11 | 5350363   | rs11037068 | G | T | 3 | 0.00973   | 0.2472 | 1.2655 | 1.3022 | 0.0258 | 72.65 |
| 2  | 113505787 | rs2305150  | C | T | 4 | 0.007356  | 0.2473 | 1.0983 | 1.0772 | 0.048  | 62.05 |
| 1  | 66607403  | rs2311985  | A | G | 4 | 0.01908   | 0.2474 | 1.1778 | 1.1397 | 0.0988 | 52.22 |
| 15 | 89947230  | rs4420510  | A | G | 4 | 0.09102   | 0.2474 | 0.9369 | 0.8937 | 0.0018 | 79.95 |
| 4  | 116448276 | rs6533848  | G | T | 4 | 0.2654    | 0.2476 | 0.9613 | 0.9058 | 0.0031 | 78.35 |
| 4  | 116450640 | rs7698264  | C | T | 4 | 0.2654    | 0.2476 | 0.9613 | 0.9058 | 0.0031 | 78.35 |
| 1  | 88279379  | rs12566596 | C | G | 4 | 0.4616    | 0.2477 | 0.9711 | 0.8919 | 0.0023 | 79.31 |
| 9  | 10655668  | rs4380991  | A | T | 4 | 0.2892    | 0.2477 | 1.0551 | 1.1647 | 0.0007 | 82.44 |

|    |           |            |   |   |   |           |        |        |        |        |       |
|----|-----------|------------|---|---|---|-----------|--------|--------|--------|--------|-------|
| 16 | 50235764  | rs7204626  | C | T | 4 | 0.09437   | 0.2478 | 1.0664 | 1.1117 | 0.0033 | 78.1  |
| 12 | 65691760  | rs11176534 | C | T | 4 | 0.1389    | 0.2479 | 0.9202 | 0.8655 | 0.0081 | 74.6  |
| 12 | 65704574  | rs905699   | C | T | 4 | 0.2212    | 0.2479 | 0.9393 | 0.8741 | 0.0057 | 76.12 |
| 11 | 81039330  | rs17142739 | A | C | 4 | 0.324     | 0.2483 | 1.0413 | 1.1107 | 0.0079 | 74.69 |
| 20 | 55508313  | rs2209885  | C | G | 4 | 0.02114   | 0.2485 | 1.0863 | 1.0725 | 0.0809 | 55.44 |
| 6  | 94818482  | rs667243   | A | G | 4 | 0.0002356 | 0.2487 | 1.1447 | 1.0872 | 0.0304 | 66.37 |
| 12 | 65708448  | rs11176540 | G | T | 4 | 0.2227    | 0.2487 | 1.0643 | 1.1441 | 0.0055 | 76.23 |
| 14 | 42258660  | rs1777077  | C | T | 4 | 0.07721   | 0.2489 | 1.0787 | 1.1093 | 0.0167 | 70.69 |
| 1  | 180318899 | rs8179259  | C | G | 4 | 0.3625    | 0.2497 | 1.0353 | 1.1189 | 0.0017 | 80.24 |
| 12 | 65706048  | rs6581729  | A | G | 4 | 0.2254    | 0.2497 | 1.0639 | 1.144  | 0.0054 | 76.3  |
| 2  | 219081012 | rs634590   | A | C | 4 | 0.1771    | 0.2499 | 1.0504 | 1.0926 | 0.0166 | 70.73 |
| 4  | 116442250 | rs1396064  | G | T | 4 | 0.2721    | 0.2501 | 1.0397 | 1.1035 | 0.0031 | 78.36 |
| 7  | 69844069  | rs4718991  | C | G | 4 | 0.1899    | 0.2505 | 0.9549 | 0.915  | 0.01   | 73.56 |
| 18 | 37360470  | rs2848760  | A | G | 4 | 0.1952    | 0.2506 | 0.9532 | 0.9172 | 0.0214 | 69.04 |
| 2  | 155411014 | rs2937600  | A | G | 4 | 0.01909   | 0.2507 | 1.0939 | 1.0794 | 0.07   | 57.5  |
| 2  | 107777551 | rs1583938  | A | C | 3 | 0.009777  | 0.2509 | 1.1093 | 1.0859 | 0.0711 | 62.17 |
| 4  | 92470862  | rs6532299  | C | T | 3 | 0.2985    | 0.2509 | 0.96   | 0.8887 | 0.0039 | 81.99 |
| 12 | 65706599  | rs11176539 | C | G | 4 | 0.2247    | 0.2509 | 1.064  | 1.1434 | 0.0056 | 76.22 |
| 6  | 94830671  | rs9354083  | C | T | 4 | 0.0002068 | 0.2511 | 0.8717 | 0.9186 | 0.0265 | 67.47 |
| 2  | 219270919 | rs1863704  | A | G | 4 | 0.1821    | 0.2512 | 0.9534 | 0.9117 | 0.0089 | 74.12 |
| 4  | 116455401 | rs1979975  | A | G | 4 | 0.2752    | 0.2514 | 0.9621 | 0.9062 | 0.003  | 78.49 |
| 4  | 116455651 | rs11098294 | C | G | 4 | 0.2752    | 0.2514 | 0.9621 | 0.9062 | 0.003  | 78.49 |
| 4  | 116459223 | rs6851203  | A | G | 4 | 0.2752    | 0.2514 | 0.9621 | 0.9062 | 0.003  | 78.49 |
| 4  | 175703538 | rs6811079  | A | G | 4 | 0.00901   | 0.2514 | 0.8523 | 0.8767 | 0.0418 | 63.48 |
| 2  | 106754740 | rs1349065  | C | G | 3 | 0.0007936 | 0.2517 | 1.1446 | 1.1043 | 0.0214 | 74    |
| 12 | 65709564  | rs11176545 | A | T | 4 | 0.2245    | 0.2518 | 1.0644 | 1.1437 | 0.0055 | 76.23 |
| 10 | 36687776  | rs11593579 | A | G | 4 | 0.06287   | 0.2523 | 1.1037 | 1.148  | 0.0063 | 75.67 |
| 5  | 28874857  | rs10520944 | A | C | 4 | 0.05947   | 0.2525 | 0.9226 | 0.891  | 0.0041 | 77.43 |
| 12 | 65705663  | rs17103210 | A | T | 4 | 0.2259    | 0.2526 | 1.0642 | 1.1436 | 0.0055 | 76.27 |
| 6  | 15948891  | rs16877113 | A | C | 4 | 0.02634   | 0.2529 | 1.1199 | 1.108  | 0.0619 | 59.12 |
| 6  | 99010723  | rs3104078  | A | T | 4 | 0.002078  | 0.253  | 0.7505 | 0.8262 | 0.0448 | 62.78 |
| 6  | 94807741  | rs2875662  | C | T | 4 | 0.0002667 | 0.2531 | 0.8747 | 0.9209 | 0.0314 | 66.1  |
| 7  | 17138564  | rs7341406  | C | G | 4 | 0.07155   | 0.2535 | 0.88   | 0.8495 | 0.0212 | 69.11 |
| 13 | 73018296  | rs17215110 | A | C | 4 | 0.02431   | 0.2535 | 0.8919 | 0.8826 | 0.0114 | 72.89 |
| 9  | 10643484  | rs4131202  | C | T | 4 | 0.1092    | 0.2537 | 0.9325 | 0.8833 | 0.0017 | 80.27 |
| 6  | 94816613  | rs6919516  | A | G | 4 | 0.0003089 | 0.2542 | 1.1418 | 1.0855 | 0.0322 | 65.86 |
| 6  | 51288724  | rs2465043  | A | G | 4 | 0.2232    | 0.2543 | 1.0466 | 1.0958 | 0.012  | 72.59 |

|    |           |            |   |   |   |           |        |        |        |        |       |
|----|-----------|------------|---|---|---|-----------|--------|--------|--------|--------|-------|
| 1  | 116602943 | rs2184484  | A | G | 4 | 0.01929   | 0.2555 | 0.9162 | 0.924  | 0.0429 | 63.22 |
| 2  | 30858680  | rs4597573  | C | T | 4 | 0.004059  | 0.2557 | 0.9038 | 0.9317 | 0.0613 | 59.23 |
| 1  | 110903737 | rs12407862 | C | T | 4 | 0.01983   | 0.256  | 0.9002 | 0.8969 | 0.0139 | 71.77 |
| 12 | 65700060  | rs7953084  | A | C | 4 | 0.2463    | 0.2561 | 1.0615 | 1.1426 | 0.0056 | 76.15 |
| 1  | 215523070 | rs7535028  | G | T | 4 | 0.132     | 0.2563 | 1.0537 | 1.0818 | 0.0244 | 68.1  |
| 3  | 116979664 | rs2972493  | A | C | 4 | 0.008041  | 0.2564 | 0.8677 | 0.9066 | 0.1052 | 51.1  |
| 6  | 99015679  | rs3125579  | A | G | 4 | 0.002532  | 0.2564 | 1.3074 | 1.2031 | 0.04   | 63.91 |
| 16 | 47660593  | rs2967260  | A | T | 4 | 0.01721   | 0.2566 | 1.091  | 1.0818 | 0.0579 | 59.92 |
| 4  | 8386637   | rs6858268  | C | T | 4 | 0.1028    | 0.2571 | 0.9427 | 0.9197 | 0.0201 | 69.48 |
| 4  | 116535799 | rs7434366  | A | T | 4 | 0.2992    | 0.2572 | 1.0385 | 1.1077 | 0.0021 | 79.55 |
| 6  | 94855791  | rs669021   | C | T | 4 | 0.0003001 | 0.2576 | 1.1446 | 1.0876 | 0.0284 | 66.92 |
| 2  | 30858633  | rs2030385  | C | T | 4 | 0.0002338 | 0.2581 | 1.144  | 1.0886 | 0.0199 | 69.55 |
| 9  | 10637333  | rs10809144 | C | T | 4 | 0.163     | 0.2581 | 1.0584 | 1.1186 | 0.0024 | 79.15 |
| 22 | 17946365  | rs5748309  | C | T | 4 | 0.02839   | 0.2581 | 0.9121 | 0.9243 | 0.0877 | 54.21 |
| 12 | 60731556  | rs2951468  | A | C | 4 | 0.1593    | 0.2583 | 1.0599 | 1.1    | 0.0187 | 69.94 |
| 12 | 65699454  | rs12369132 | A | G | 4 | 0.2469    | 0.2588 | 0.9419 | 0.8753 | 0.0055 | 76.23 |
| 6  | 94824189  | rs1538283  | A | G | 4 | 0.0001785 | 0.2589 | 0.8713 | 0.919  | 0.0235 | 68.38 |
| 6  | 94834038  | rs9351405  | A | G | 4 | 0.000216  | 0.2591 | 0.8729 | 0.9195 | 0.0244 | 68.1  |
| 1  | 173301060 | rs10798331 | A | G | 4 | 0.2816    | 0.2593 | 1.04   | 1.1119 | 0.0013 | 80.97 |
| 8  | 32647451  | rs12541855 | C | T | 4 | 0.1054    | 0.2596 | 1.0608 | 1.1031 | 0.0043 | 77.24 |
| 5  | 118636074 | rs13361153 | A | G | 4 | 0.3886    | 0.2598 | 1.0373 | 1.1192 | 0.0066 | 75.46 |
| 4  | 116484342 | rs6821637  | G | T | 4 | 0.2618    | 0.26   | 1.0409 | 1.1046 | 0.0023 | 79.32 |
| 6  | 94830956  | rs9445199  | A | G | 4 | 0.0002116 | 0.2606 | 0.8727 | 0.9197 | 0.0241 | 68.17 |
| 11 | 80658536  | rs7941624  | A | G | 4 | 0.2834    | 0.2606 | 1.0501 | 1.1214 | 0.0104 | 73.36 |
| 20 | 56635234  | rs4812022  | C | T | 4 | 0.5388    | 0.2606 | 1.0304 | 1.1363 | 0.0073 | 75.07 |
| 2  | 113520034 | rs7569284  | A | G | 4 | 0.01036   | 0.2607 | 0.9089 | 0.9234 | 0.0382 | 64.33 |
| 2  | 229863370 | rs1226936  | G | T | 4 | 0.01717   | 0.2607 | 0.8511 | 0.865  | 0.038  | 64.38 |
| 6  | 94849976  | rs658208   | A | G | 4 | 0.01158   | 0.2613 | 1.0932 | 1.0668 | 0.098  | 52.35 |
| 10 | 22883117  | rs12146350 | C | G | 4 | 0.003252  | 0.2615 | 0.9001 | 0.9331 | 0.0712 | 57.28 |
| 9  | 10638898  | rs1923439  | G | T | 4 | 0.1714    | 0.2617 | 1.0572 | 1.119  | 0.0021 | 79.65 |
| 3  | 14908226  | rs11924206 | G | T | 4 | 0.1771    | 0.2618 | 0.947  | 0.9144 | 0.0245 | 68.05 |
| 2  | 133485247 | rs1437896  | C | T | 4 | 0.7055    | 0.2619 | 0.9864 | 0.8928 | 0.0004 | 83.6  |
| 2  | 113514439 | rs7557928  | G | T | 4 | 0.01052   | 0.2622 | 0.9091 | 0.9238 | 0.0389 | 64.18 |
| 4  | 116486031 | rs6829587  | C | T | 4 | 0.2673    | 0.2622 | 1.0404 | 1.1041 | 0.0023 | 79.33 |
| 2  | 219245468 | rs2241527  | A | G | 4 | 0.1752    | 0.2624 | 0.9526 | 0.915  | 0.0107 | 73.21 |
| 2  | 229863870 | rs11676521 | G | T | 4 | 0.01934   | 0.2625 | 0.8536 | 0.8668 | 0.0411 | 63.65 |
| 6  | 94830432  | rs9354082  | C | T | 4 | 0.0002136 | 0.2626 | 0.8728 | 0.9199 | 0.0239 | 68.25 |

|    |           |            |   |   |   |           |        |        |        |        |       |
|----|-----------|------------|---|---|---|-----------|--------|--------|--------|--------|-------|
| 2  | 229856782 | rs1226946  | C | T | 4 | 0.01662   | 0.2628 | 1.1758 | 1.1557 | 0.0371 | 64.61 |
| 6  | 94814119  | rs678036   | C | G | 4 | 0.000303  | 0.2629 | 0.8757 | 0.9222 | 0.0305 | 66.34 |
| 6  | 30074705  | rs9261043  | C | T | 3 | 0.0002851 | 0.2631 | 0.7088 | 0.7984 | 0.0515 | 66.28 |
| 10 | 47991283  | rs3814160  | C | T | 4 | 0.008811  | 0.2636 | 0.8701 | 0.8977 | 0.0485 | 61.95 |
| 4  | 8386558   | rs6825003  | C | T | 4 | 0.1089    | 0.2637 | 1.0597 | 1.0863 | 0.0195 | 69.67 |
| 13 | 41467528  | rs2324845  | C | T | 4 | 0.1397    | 0.2641 | 1.0535 | 1.093  | 0.008  | 74.65 |
| 15 | 86294466  | rs4887337  | A | C | 4 | 0.003477  | 0.2641 | 1.1813 | 1.1414 | 0.0167 | 70.67 |
| 4  | 116463016 | rs11727958 | C | T | 4 | 0.3271    | 0.2643 | 1.0363 | 1.1037 | 0.0031 | 78.39 |
| 4  | 116460667 | rs10516610 | C | T | 4 | 0.2826    | 0.2646 | 0.9626 | 0.9065 | 0.0022 | 79.41 |
| 5  | 28851719  | rs16898178 | A | C | 4 | 0.06786   | 0.2651 | 0.9249 | 0.893  | 0.0037 | 77.73 |
| 4  | 116483034 | rs4834466  | C | G | 4 | 0.2821    | 0.2653 | 1.0389 | 1.1033 | 0.0021 | 79.53 |
| 6  | 94855506  | rs471348   | A | G | 4 | 0.01194   | 0.2656 | 0.9151 | 0.9376 | 0.0964 | 52.65 |
| 1  | 215522526 | rs10158471 | A | G | 4 | 0.1442    | 0.2657 | 0.9505 | 0.9254 | 0.0232 | 68.48 |
| 9  | 10639309  | rs1322303  | A | G | 4 | 0.1785    | 0.2659 | 0.9468 | 0.8942 | 0.002  | 79.77 |
| 11 | 106222728 | rs1954864  | G | T | 4 | 0.1156    | 0.2659 | 0.9377 | 0.9075 | 0.0145 | 71.54 |
| 2  | 219025492 | rs3755042  | C | T | 4 | 0.1733    | 0.2664 | 0.9525 | 0.9198 | 0.0174 | 70.42 |
| 2  | 13999212  | rs747193   | A | G | 4 | 0.3362    | 0.2665 | 0.9485 | 0.8754 | 0.0101 | 73.51 |
| 3  | 129574792 | rs1735538  | A | G | 4 | 0.3242    | 0.2667 | 1.0401 | 1.1011 | 0.0137 | 71.87 |
| 2  | 219028129 | rs7601872  | C | G | 4 | 0.1741    | 0.2668 | 1.0498 | 1.0871 | 0.0174 | 70.42 |
| 3  | 102284333 | rs13096071 | C | T | 4 | 0.06519   | 0.2668 | 1.1254 | 1.2146 | 0.0004 | 83.74 |
| 10 | 85962578  | rs10887255 | C | T | 4 | 0.03675   | 0.2668 | 0.9209 | 0.9175 | 0.0309 | 66.21 |
| 13 | 43987160  | rs9533885  | A | G | 3 | 0.002074  | 0.2668 | 1.6542 | 1.3877 | 0.1412 | 48.92 |
| 8  | 14884772  | rs10097898 | A | G | 4 | 0.02915   | 0.2674 | 1.0841 | 1.0766 | 0.0518 | 61.23 |
| 4  | 116491650 | rs12503088 | C | G | 4 | 0.2802    | 0.2675 | 0.9622 | 0.9063 | 0.0021 | 79.54 |
| 10 | 85956138  | rs960731   | G | T | 4 | 0.04484   | 0.2675 | 1.0842 | 1.0901 | 0.0343 | 65.32 |
| 2  | 60184903  | rs972337   | C | T | 4 | 0.3647    | 0.2676 | 0.9671 | 0.9164 | 0.0134 | 71.97 |
| 11 | 15191628  | rs16931218 | C | T | 4 | 0.1376    | 0.2681 | 1.1548 | 1.2508 | 0.0124 | 72.44 |
| 4  | 116461695 | rs6533852  | G | T | 4 | 0.2929    | 0.2684 | 0.9634 | 0.907  | 0.0021 | 79.54 |
| 7  | 17140404  | rs7341466  | G | T | 4 | 0.08469   | 0.2685 | 0.883  | 0.8468 | 0.0167 | 70.66 |
| 6  | 94830027  | rs1338341  | A | G | 4 | 0.0002109 | 0.2688 | 0.8727 | 0.9204 | 0.0225 | 68.67 |
| 13 | 43902494  | rs2875552  | C | T | 4 | 0.176     | 0.2688 | 1.0496 | 1.0908 | 0.0108 | 73.18 |
| 4  | 116474793 | rs13101335 | G | T | 4 | 0.2834    | 0.2691 | 1.0391 | 1.103  | 0.0021 | 79.54 |
| 8  | 127013476 | rs2087688  | A | G | 4 | 0.327     | 0.2692 | 1.0361 | 1.1019 | 0.0029 | 78.52 |
| 3  | 102279569 | rs16843216 | C | T | 4 | 0.2004    | 0.2693 | 0.9374 | 0.8357 | 0      | 88.08 |
| 6  | 15953087  | rs1927587  | C | T | 4 | 0.03004   | 0.2695 | 0.8954 | 0.9037 | 0.0533 | 60.9  |
| 6  | 94856518  | rs682644   | C | T | 4 | 0.01424   | 0.2696 | 1.0912 | 1.066  | 0.0996 | 52.08 |
| 6  | 94856881  | rs2787948  | C | T | 4 | 0.01424   | 0.2696 | 1.0912 | 1.066  | 0.0996 | 52.08 |

|    |           |            |   |   |   |           |        |        |        |        |       |
|----|-----------|------------|---|---|---|-----------|--------|--------|--------|--------|-------|
| 2  | 17267368  | rs13018947 | C | G | 4 | 0.3333    | 0.2698 | 1.0366 | 1.095  | 0.0107 | 73.2  |
| 8  | 127018859 | rs4568586  | A | T | 4 | 0.3254    | 0.27   | 0.9651 | 0.9076 | 0.0029 | 78.59 |
| 8  | 127007226 | rs1491476  | A | G | 4 | 0.326     | 0.2702 | 0.9651 | 0.9098 | 0.004  | 77.5  |
| 2  | 219050528 | rs3845835  | C | T | 4 | 0.1806    | 0.2704 | 0.9532 | 0.9204 | 0.0172 | 70.48 |
| 12 | 94741290  | rs10777742 | C | T | 4 | 0.02251   | 0.2704 | 0.9148 | 0.9303 | 0.0821 | 55.23 |
| 8  | 127015428 | rs7819223  | C | T | 4 | 0.3296    | 0.2706 | 0.9654 | 0.9076 | 0.0029 | 78.61 |
| 12 | 94730019  | rs7307769  | A | G | 4 | 0.0235    | 0.2709 | 1.0925 | 1.075  | 0.0808 | 55.46 |
| 4  | 116435600 | rs4464590  | C | T | 4 | 0.2898    | 0.271  | 1.0385 | 1.1025 | 0.0022 | 79.51 |
| 8  | 140501955 | rs2447553  | C | T | 4 | 0.52      | 0.2715 | 0.9781 | 0.9172 | 0.0073 | 75.03 |
| 5  | 149562853 | rs2240791  | A | G | 4 | 0.02084   | 0.2716 | 1.256  | 1.2262 | 0.0386 | 64.24 |
| 21 | 40054216  | rs2837176  | C | G | 4 | 0.03014   | 0.2716 | 1.0843 | 1.0752 | 0.059  | 59.71 |
| 6  | 92320349  | rs9342290  | C | T | 4 | 0.4975    | 0.2718 | 0.9719 | 0.8982 | 0.0067 | 75.4  |
| 6  | 99803170  | rs12194369 | A | G | 4 | 0.1191    | 0.2722 | 0.9361 | 0.9045 | 0.011  | 73.06 |
| 4  | 116464246 | rs1948983  | C | G | 4 | 0.3034    | 0.2723 | 0.9641 | 0.9074 | 0.002  | 79.67 |
| 1  | 66603687  | rs2275644  | A | G | 4 | 0.02299   | 0.2725 | 0.8516 | 0.8811 | 0.0933 | 53.2  |
| 16 | 75659337  | rs1485793  | A | G | 4 | 0.4454    | 0.2728 | 1.0315 | 1.1025 | 0.0131 | 72.1  |
| 2  | 219060816 | rs7571743  | C | T | 4 | 0.1743    | 0.2732 | 0.9521 | 0.9189 | 0.015  | 71.33 |
| 8  | 32664543  | rs12541309 | A | G | 4 | 0.4505    | 0.2734 | 0.964  | 0.8801 | 0.0056 | 76.2  |
| 4  | 116465817 | rs4349617  | C | T | 4 | 0.2979    | 0.2736 | 0.9635 | 0.9072 | 0.002  | 79.65 |
| 2  | 98863360  | rs17022036 | G | T | 4 | 0.03722   | 0.2737 | 0.8641 | 0.8608 | 0.0254 | 67.78 |
| 8  | 36281532  | rs12544826 | A | G | 4 | 0.01658   | 0.2737 | 0.8957 | 0.9221 | 0.1079 | 50.63 |
| 1  | 66603910  | rs7538869  | G | T | 4 | 0.02328   | 0.2742 | 0.852  | 0.8814 | 0.0925 | 53.34 |
| 2  | 219044188 | rs10200507 | A | C | 4 | 0.1881    | 0.2745 | 0.954  | 0.921  | 0.0171 | 70.54 |
| 4  | 116466112 | rs4519812  | A | G | 4 | 0.2987    | 0.2745 | 0.9636 | 0.9074 | 0.002  | 79.65 |
| 20 | 19738602  | rs16981148 | A | G | 4 | 0.118     | 0.2745 | 1.0984 | 1.1524 | 0.0096 | 73.76 |
| 1  | 81222832  | rs1863618  | A | G | 4 | 0.01302   | 0.2746 | 1.0943 | 1.0704 | 0.0742 | 56.7  |
| 6  | 15945269  | rs13211010 | C | T | 4 | 0.02466   | 0.2748 | 1.1214 | 1.1076 | 0.0469 | 62.29 |
| 4  | 116481902 | rs7439118  | C | T | 4 | 0.2985    | 0.2749 | 1.0378 | 1.1022 | 0.002  | 79.73 |
| 3  | 102284910 | rs16843229 | A | G | 4 | 0.2278    | 0.2762 | 1.064  | 1.1971 | 0      | 88.11 |
| 5  | 93821414  | rs9314112  | A | G | 4 | 0.5456    | 0.2762 | 1.0211 | 1.0924 | 0.0055 | 76.27 |
| 4  | 116473561 | rs6533855  | A | G | 4 | 0.3142    | 0.2766 | 1.0364 | 1.1016 | 0.0019 | 79.88 |
| 5  | 164985118 | rs17065434 | C | T | 4 | 0.005867  | 0.2768 | 0.8911 | 0.9099 | 0.0172 | 70.48 |
| 6  | 94821751  | rs2787944  | C | T | 4 | 0.0002667 | 0.277  | 1.1434 | 1.0849 | 0.0229 | 68.55 |
| 9  | 10625939  | rs10756072 | A | G | 4 | 0.1921    | 0.277  | 0.9491 | 0.9037 | 0.0046 | 76.94 |
| 4  | 127224550 | rs11731526 | C | G | 4 | 0.1281    | 0.2776 | 0.9268 | 0.8968 | 0.0217 | 68.95 |
| 1  | 154309539 | rs11264432 | A | G | 3 | 0.01294   | 0.278  | 0.9085 | 0.908  | 0.0123 | 77.28 |
| 2  | 219067929 | rs6710383  | G | T | 4 | 0.1832    | 0.278  | 1.0493 | 1.0874 | 0.0148 | 71.42 |

|    |           |            |   |   |   |          |        |        |        |        |       |
|----|-----------|------------|---|---|---|----------|--------|--------|--------|--------|-------|
| 21 | 40054313  | rs2837178  | A | G | 4 | 0.03042  | 0.2781 | 1.0842 | 1.0749 | 0.0558 | 60.37 |
| 9  | 119035785 | rs1335406  | A | T | 4 | 0.006204 | 0.2787 | 0.8115 | 0.8585 | 0.0521 | 61.15 |
| 4  | 116469038 | rs7676815  | C | T | 4 | 0.3089   | 0.2788 | 1.037  | 1.1017 | 0.0019 | 79.86 |
| 5  | 93827557  | rs7728878  | C | T | 4 | 0.5815   | 0.279  | 0.9809 | 0.9139 | 0.0046 | 76.93 |
| 3  | 124820104 | rs860224   | C | G | 4 | 0.03754  | 0.2792 | 0.9109 | 0.897  | 0.0068 | 75.36 |
| 3  | 172439746 | rs9857839  | C | T | 2 | 0.001595 | 0.2792 | 4.2554 | 2.8514 | 0.0894 | 65.33 |
| 4  | 72339718  | rs4694387  | A | C | 4 | 0.09756  | 0.2794 | 1.0913 | 1.1699 | 0.0006 | 82.55 |
| 12 | 130815441 | rs6598153  | C | T | 4 | 0.02054  | 0.2794 | 0.921  | 0.9366 | 0.0766 | 56.25 |
| 1  | 65104374  | rs12093269 | C | T | 4 | 0.02181  | 0.2796 | 1.136  | 1.1302 | 0.0197 | 69.62 |
| 6  | 92328542  | rs9342293  | A | T | 4 | 0.5013   | 0.2797 | 1.0286 | 1.1121 | 0.0063 | 75.7  |
| 20 | 19738531  | rs16981142 | C | G | 4 | 0.07233  | 0.2798 | 1.1152 | 1.1545 | 0.0084 | 74.42 |
| 6  | 94852999  | rs606061   | A | G | 4 | 0.01342  | 0.2799 | 1.0912 | 1.0649 | 0.0935 | 53.15 |
| 6  | 94854912  | rs591551   | C | T | 4 | 0.01342  | 0.2799 | 1.0912 | 1.0649 | 0.0935 | 53.15 |
| 11 | 106336866 | rs12364403 | C | T | 4 | 0.0573   | 0.2803 | 0.9251 | 0.9032 | 0.0064 | 75.65 |
| 3  | 102273952 | rs13081830 | A | G | 4 | 0.2497   | 0.2808 | 1.0598 | 1.191  | 0      | 88.02 |
| 1  | 66627158  | rs12239708 | A | T | 4 | 0.02391  | 0.2811 | 0.8531 | 0.8825 | 0.0898 | 53.82 |
| 3  | 102283947 | rs16843225 | G | T | 4 | 0.2477   | 0.2813 | 1.0604 | 1.1919 | 0      | 88.05 |
| 6  | 87192966  | rs9362321  | C | T | 4 | 0.03221  | 0.2814 | 0.9048 | 0.9086 | 0.0355 | 65.02 |
| 1  | 66624485  | rs6701234  | G | T | 4 | 0.02462  | 0.2815 | 0.8538 | 0.8831 | 0.0915 | 53.52 |
| 8  | 127011528 | rs1491474  | A | C | 4 | 0.3664   | 0.2818 | 0.9679 | 0.9085 | 0.0024 | 79.15 |
| 8  | 140503436 | rs2468726  | C | G | 4 | 0.5394   | 0.282  | 1.0216 | 1.0884 | 0.0079 | 74.68 |
| 4  | 127239590 | rs6820042  | A | G | 4 | 0.1142   | 0.2823 | 1.0806 | 1.1173 | 0.0147 | 71.45 |
| 6  | 15943835  | rs4712261  | C | T | 4 | 0.02607  | 0.2823 | 0.8928 | 0.9024 | 0.0398 | 63.95 |
| 16 | 56846486  | rs11076230 | G | T | 4 | 0.8584   | 0.2827 | 0.9913 | 0.8773 | 0.0032 | 78.26 |
| 2  | 219081441 | rs636723   | A | G | 4 | 0.2037   | 0.2828 | 0.9556 | 0.9221 | 0.0167 | 70.69 |
| 2  | 219083955 | rs6717433  | C | G | 4 | 0.2037   | 0.2828 | 0.9556 | 0.9221 | 0.0167 | 70.69 |
| 3  | 102282360 | rs17219986 | A | G | 4 | 0.2524   | 0.2828 | 1.0598 | 1.1913 | 0      | 88.06 |
| 6  | 92320478  | rs9345149  | A | T | 4 | 0.5063   | 0.2828 | 0.9725 | 0.9008 | 0.007  | 75.24 |
| 2  | 38422331  | rs11679271 | C | T | 4 | 0.234    | 0.2832 | 1.0452 | 1.114  | 0.0007 | 82.39 |
| 2  | 219082361 | rs662250   | A | T | 4 | 0.2046   | 0.2832 | 1.0464 | 1.0844 | 0.0167 | 70.69 |
| 6  | 92321886  | rs9362888  | A | G | 4 | 0.5102   | 0.2834 | 1.028  | 1.1103 | 0.0068 | 75.38 |
| 6  | 94819838  | rs590701   | G | T | 4 | 0.009065 | 0.2834 | 1.0964 | 1.0658 | 0.0825 | 55.15 |
| 22 | 33864933  | rs4821368  | C | G | 4 | 0.03632  | 0.2835 | 1.0904 | 1.1105 | 0.0049 | 76.74 |
| 1  | 66624749  | rs6703929  | C | T | 4 | 0.02491  | 0.2836 | 0.854  | 0.8833 | 0.0907 | 53.65 |
| 8  | 127612296 | rs11990954 | A | C | 4 | 0.2465   | 0.284  | 1.057  | 1.1171 | 0.0123 | 72.49 |
| 2  | 5605816   | rs10929647 | A | C | 4 | 0.014    | 0.2841 | 0.9175 | 0.8963 | 0.0002 | 85.14 |
| 5  | 149561988 | rs2240787  | C | T | 4 | 0.01968  | 0.2845 | 0.7924 | 0.8181 | 0.0378 | 64.44 |

|    |           |            |   |   |   |           |        |        |        |        |       |
|----|-----------|------------|---|---|---|-----------|--------|--------|--------|--------|-------|
| 12 | 94742289  | rs10859960 | A | G | 4 | 0.02468   | 0.2845 | 1.0917 | 1.0734 | 0.0778 | 56.02 |
| 8  | 126997191 | rs2385503  | A | T | 4 | 0.3454    | 0.2846 | 1.0349 | 1.0877 | 0.0115 | 72.85 |
| 19 | 37368143  | rs12976005 | C | G | 4 | 0.7173    | 0.2846 | 1.013  | 1.1096 | 0.0005 | 83.23 |
| 9  | 10625232  | rs1322300  | C | T | 4 | 0.2058    | 0.2847 | 1.052  | 1.1052 | 0.0044 | 77.09 |
| 2  | 219141841 | rs526897   | A | G | 4 | 0.2052    | 0.2848 | 1.0464 | 1.084  | 0.0169 | 70.6  |
| 2  | 133486143 | rs4953868  | A | G | 4 | 0.6851    | 0.285  | 0.9853 | 0.8957 | 0.0003 | 84.18 |
| 11 | 106171269 | rs10890590 | A | G | 4 | 0.08405   | 0.2851 | 0.9327 | 0.904  | 0.0053 | 76.43 |
| 1  | 66625390  | rs6691740  | A | C | 4 | 0.02473   | 0.2852 | 0.8544 | 0.8833 | 0.0877 | 54.2  |
| 6  | 99797170  | rs12193060 | A | G | 4 | 0.1407    | 0.2853 | 0.9392 | 0.9062 | 0.0104 | 73.34 |
| 16 | 56846678  | rs12596498 | C | T | 4 | 0.8764    | 0.2853 | 1.0077 | 1.1396 | 0.003  | 78.42 |
| 5  | 93824426  | rs952663   | A | G | 4 | 0.5674    | 0.2857 | 1.0199 | 1.0908 | 0.0051 | 76.53 |
| 16 | 56842704  | rs1974876  | C | T | 4 | 0.876     | 0.2857 | 1.0077 | 1.1391 | 0.0031 | 78.31 |
| 2  | 219110935 | rs523305   | C | T | 4 | 0.2068    | 0.2858 | 1.0462 | 1.084  | 0.0167 | 70.69 |
| 2  | 219151961 | rs3770216  | A | G | 4 | 0.2112    | 0.2862 | 1.0457 | 1.0837 | 0.0171 | 70.54 |
| 8  | 126994033 | rs7007303  | A | G | 4 | 0.3604    | 0.2862 | 0.9672 | 0.9198 | 0.0119 | 72.64 |
| 21 | 33674908  | rs12329794 | A | G | 4 | 0.2243    | 0.2863 | 1.0611 | 1.1157 | 0.0141 | 71.72 |
| 2  | 219140813 | rs496674   | A | G | 4 | 0.2083    | 0.2864 | 1.046  | 1.0838 | 0.0167 | 70.67 |
| 2  | 219207003 | rs7574429  | G | T | 4 | 0.2259    | 0.2866 | 1.0443 | 1.0854 | 0.0142 | 71.66 |
| 15 | 60544836  | rs2940333  | A | G | 4 | 0.03284   | 0.2868 | 0.9109 | 0.9261 | 0.0931 | 53.22 |
| 2  | 219095517 | rs599973   | C | G | 4 | 0.2125    | 0.2871 | 0.9564 | 0.9226 | 0.0164 | 70.79 |
| 16 | 56847308  | rs16959980 | C | T | 4 | 0.889     | 0.2873 | 0.9932 | 0.8778 | 0.003  | 78.5  |
| 2  | 107784033 | rs13415031 | C | G | 3 | 0.01133   | 0.2875 | 0.9013 | 0.9212 | 0.053  | 65.95 |
| 2  | 219107871 | rs687747   | C | T | 4 | 0.2137    | 0.2878 | 1.0455 | 1.0836 | 0.0166 | 70.71 |
| 2  | 219111266 | rs7583449  | A | C | 4 | 0.2114    | 0.288  | 1.0457 | 1.0837 | 0.0165 | 70.76 |
| 22 | 33869717  | rs5755606  | C | T | 4 | 0.03066   | 0.288  | 0.9177 | 0.9072 | 0.0066 | 75.5  |
| 2  | 128371789 | rs7570249  | G | T | 4 | 0.02844   | 0.2881 | 1.0836 | 1.0685 | 0.0845 | 54.78 |
| 8  | 135101424 | rs1158934  | A | G | 4 | 0.01533   | 0.2881 | 0.9187 | 0.927  | 0.0214 | 69.05 |
| 2  | 30858916  | rs2030386  | A | G | 4 | 0.0001962 | 0.2883 | 0.8727 | 0.9216 | 0.0159 | 70.98 |
| 2  | 219137296 | rs490483   | A | T | 4 | 0.212     | 0.2883 | 0.9563 | 0.9229 | 0.0167 | 70.68 |
| 2  | 219145840 | rs523937   | C | G | 4 | 0.2129    | 0.2888 | 1.0456 | 1.0833 | 0.0169 | 70.62 |
| 3  | 102256173 | rs13060849 | A | C | 4 | 0.2369    | 0.2889 | 0.9417 | 0.8442 | 0      | 87.49 |
| 11 | 106227169 | rs10890611 | C | T | 4 | 0.1234    | 0.2889 | 0.9397 | 0.9099 | 0.0106 | 73.26 |
| 15 | 86273174  | rs879131   | A | G | 4 | 0.006504  | 0.2892 | 1.1299 | 1.0911 | 0.0438 | 63.01 |
| 2  | 219180978 | rs3731867  | A | G | 4 | 0.2166    | 0.2893 | 0.9567 | 0.9216 | 0.014  | 71.75 |
| 2  | 219128179 | rs12619347 | C | T | 4 | 0.2144    | 0.2894 | 0.9566 | 0.9229 | 0.0162 | 70.88 |
| 6  | 15935221  | rs13190874 | C | T | 4 | 0.0237    | 0.2896 | 1.1229 | 1.1074 | 0.042  | 63.42 |
| 2  | 38422312  | rs11679270 | A | C | 4 | 0.2432    | 0.2899 | 0.9576 | 0.8991 | 0.0007 | 82.41 |

|    |           |            |   |   |   |           |        |        |        |        |       |
|----|-----------|------------|---|---|---|-----------|--------|--------|--------|--------|-------|
| 2  | 219117933 | rs630858   | A | C | 4 | 0.2155    | 0.2901 | 1.0453 | 1.0833 | 0.0164 | 70.79 |
| 4  | 55661374  | rs17710298 | C | T | 3 | 0.04306   | 0.2903 | 0.7563 | 0.697  | 0.0086 | 78.96 |
| 6  | 94854362  | rs694170   | A | G | 4 | 0.01433   | 0.2903 | 1.0903 | 1.0638 | 0.0907 | 53.65 |
| 3  | 102253981 | rs1375513  | G | T | 4 | 0.3494    | 0.2908 | 1.0434 | 1.1678 | 0      | 88.19 |
| 2  | 107782134 | rs6542736  | A | G | 3 | 0.01208   | 0.291  | 0.9028 | 0.9229 | 0.056  | 65.31 |
| 6  | 94818161  | rs10944713 | A | T | 4 | 0.009731  | 0.291  | 1.0954 | 1.0649 | 0.081  | 55.43 |
| 4  | 116420192 | rs13123243 | A | T | 4 | 0.3629    | 0.2913 | 1.0334 | 1.1022 | 0.0014 | 80.74 |
| 10 | 48000055  | rs17457528 | A | G | 4 | 0.01197   | 0.2915 | 0.8746 | 0.9038 | 0.0513 | 61.34 |
| 12 | 94740811  | rs10859959 | C | T | 4 | 0.02535   | 0.292  | 1.0912 | 1.0724 | 0.0767 | 56.23 |
| 2  | 219173054 | rs832798   | A | G | 4 | 0.2211    | 0.2922 | 1.0448 | 1.0837 | 0.0155 | 71.14 |
| 3  | 102255525 | rs10511182 | C | G | 4 | 0.2501    | 0.2923 | 0.9433 | 0.8456 | 0      | 87.42 |
| 2  | 219132608 | rs576901   | A | G | 4 | 0.2204    | 0.2925 | 0.9571 | 0.9235 | 0.0165 | 70.74 |
| 3  | 102256428 | rs13065684 | C | T | 4 | 0.2517    | 0.2925 | 1.0599 | 1.183  | 0      | 87.49 |
| 6  | 15935963  | rs4712260  | A | G | 4 | 0.02572   | 0.2931 | 1.1208 | 1.1054 | 0.0433 | 63.13 |
| 2  | 219170663 | rs620596   | A | G | 4 | 0.2227    | 0.2933 | 1.0446 | 1.0831 | 0.0162 | 70.88 |
| 6  | 92326845  | rs9345152  | A | G | 4 | 0.5507    | 0.2933 | 0.9753 | 0.902  | 0.0064 | 75.63 |
| 2  | 30859375  | rs6548035  | A | G | 4 | 0.0002261 | 0.2934 | 1.1456 | 1.0851 | 0.0151 | 71.3  |
| 10 | 85953055  | rs7073756  | C | T | 4 | 0.039     | 0.2935 | 0.9185 | 0.9152 | 0.0207 | 69.28 |
| 4  | 116426743 | rs6813599  | A | T | 4 | 0.3613    | 0.2936 | 0.9676 | 0.9076 | 0.0013 | 80.88 |
| 5  | 13558432  | rs4463179  | A | G | 4 | 0.01894   | 0.2937 | 1.1471 | 1.1916 | 0.0002 | 84.93 |
| 19 | 37367247  | rs10411220 | A | G | 4 | 0.684     | 0.2939 | 1.0151 | 1.1102 | 0.0005 | 82.97 |
| 2  | 219151245 | rs562510   | A | C | 4 | 0.2272    | 0.2942 | 0.9577 | 0.9237 | 0.0165 | 70.75 |
| 16 | 56846460  | rs11076229 | A | G | 4 | 0.9318    | 0.2943 | 0.9958 | 0.8798 | 0.0029 | 78.54 |
| 16 | 53285438  | rs17205999 | A | G | 4 | 0.2805    | 0.2944 | 1.04   | 1.0855 | 0.0123 | 72.47 |
| 4  | 127224194 | rs11726082 | C | T | 4 | 0.1235    | 0.2946 | 0.9258 | 0.8984 | 0.0193 | 69.74 |
| 2  | 219150743 | rs3755041  | A | T | 4 | 0.2281    | 0.2947 | 1.0441 | 1.0824 | 0.0167 | 70.69 |
| 2  | 38411164  | rs1375010  | A | G | 4 | 0.2718    | 0.2949 | 0.96   | 0.9008 | 0.0008 | 82.19 |
| 13 | 85339936  | rs9547416  | A | T | 4 | 0.6442    | 0.295  | 0.9839 | 0.9134 | 0.0024 | 79.15 |
| 7  | 78883432  | rs2190179  | A | C | 4 | 0.4203    | 0.2951 | 1.0322 | 1.0989 | 0.0054 | 76.3  |
| 4  | 127248513 | rs17010704 | A | T | 4 | 0.1296    | 0.2953 | 1.0772 | 1.115  | 0.0136 | 71.9  |
| 2  | 38409334  | rs4589732  | C | G | 4 | 0.2879    | 0.2957 | 1.0402 | 1.1097 | 0.0008 | 82.13 |
| 2  | 219149672 | rs647990   | C | T | 4 | 0.2273    | 0.2959 | 1.0444 | 1.0823 | 0.0173 | 70.44 |
| 6  | 99799997  | rs1353588  | A | C | 4 | 0.1503    | 0.2959 | 1.0633 | 1.1023 | 0.0095 | 73.81 |
| 8  | 127608781 | rs6989132  | C | T | 4 | 0.2176    | 0.296  | 1.0606 | 1.1152 | 0.0118 | 72.68 |
| 12 | 104624562 | rs1962255  | A | C | 4 | 0.1494    | 0.2963 | 1.0574 | 1.0927 | 0.0099 | 73.62 |
| 21 | 33678481  | rs7280245  | A | G | 4 | 0.2274    | 0.2964 | 0.9429 | 0.8986 | 0.0137 | 71.87 |
| 13 | 21757174  | rs9510082  | A | G | 4 | 0.0402    | 0.2966 | 1.0781 | 1.0711 | 0.0562 | 60.29 |



|    |           |            |   |   |   |           |        |        |        |        |       |
|----|-----------|------------|---|---|---|-----------|--------|--------|--------|--------|-------|
| 13 | 84064321  | rs9546775  | G | T | 4 | 0.2116    | 0.2966 | 1.0663 | 1.1316 | 0.0044 | 77.13 |
| 2  | 219165985 | rs585185   | A | G | 4 | 0.2391    | 0.297  | 1.0442 | 1.086  | 0.0135 | 71.96 |
| 5  | 25914456  | rs6452297  | C | T | 4 | 0.62      | 0.2972 | 1.0187 | 1.1057 | 0.0011 | 81.3  |
| 19 | 40235596  | rs870379   | A | G | 4 | 0.00771   | 0.2974 | 0.9071 | 0.9158 | 0.0058 | 76.01 |
| 3  | 102265765 | rs16843198 | G | T | 4 | 0.2717    | 0.2976 | 0.9457 | 0.8461 | 0      | 87.61 |
| 3  | 124829191 | rs820450   | A | T | 4 | 0.0435    | 0.2978 | 0.9133 | 0.9053 | 0.012  | 72.61 |
| 2  | 172252159 | rs6721680  | G | T | 3 | 0.1964    | 0.298  | 1.0527 | 1.1362 | 0.0003 | 87.68 |
| 1  | 180325179 | rs7537211  | A | G | 4 | 0.3896    | 0.2981 | 1.0322 | 1.0984 | 0.0032 | 78.29 |
| 2  | 172376961 | rs3770451  | G | T | 3 | 0.2036    | 0.2982 | 1.0519 | 1.1309 | 0.0005 | 86.71 |
| 5  | 114734342 | rs7701924  | A | G | 4 | 0.2547    | 0.2982 | 1.0731 | 1.1349 | 0.0207 | 69.27 |
| 4  | 127243008 | rs17010686 | A | G | 4 | 0.1341    | 0.2989 | 0.9291 | 0.8975 | 0.0135 | 71.95 |
| 8  | 140499179 | rs2169623  | A | G | 4 | 0.5863    | 0.2992 | 0.9813 | 0.9211 | 0.0072 | 75.08 |
| 2  | 98867750  | rs1574516  | C | T | 4 | 0.0305    | 0.2995 | 0.8523 | 0.864  | 0.0271 | 67.29 |
| 8  | 127614227 | rs16901493 | G | T | 4 | 0.3054    | 0.2998 | 1.0501 | 1.1138 | 0.0117 | 72.73 |
| 2  | 30859637  | rs6710242  | C | T | 4 | 0.0002199 | 0.3    | 0.8717 | 0.921  | 0.013  | 72.16 |
| 15 | 90026124  | rs11852644 | A | T | 4 | 0.03111   | 0.3001 | 1.1445 | 1.1273 | 0.0425 | 63.3  |
| 22 | 33862734  | rs1473816  | A | G | 4 | 0.05074   | 0.3007 | 1.0848 | 1.1088 | 0.004  | 77.45 |
| 7  | 152433153 | rs760226   | A | G | 4 | 0.09139   | 0.3015 | 1.0652 | 1.099  | 0.0031 | 78.37 |
| 2  | 219018727 | rs4674308  | A | C | 4 | 0.1978    | 0.3016 | 0.955  | 0.924  | 0.0148 | 71.43 |
| 11 | 106197626 | rs1487892  | A | G | 4 | 0.1302    | 0.3019 | 0.9409 | 0.9098 | 0.0073 | 75.04 |
| 5  | 149543189 | rs2240782  | A | C | 3 | 0.004723  | 0.302  | 1.5267 | 1.3109 | 0.2045 | 36.99 |
| 22 | 36129946  | rs6000718  | A | G | 4 | 0.04014   | 0.3021 | 0.9173 | 0.9239 | 0.0495 | 61.73 |
| 2  | 172272168 | rs312925   | A | G | 3 | 0.2019    | 0.3022 | 1.0521 | 1.1354 | 0.0003 | 87.76 |
| 11 | 9802854   | rs360118   | C | G | 4 | 0.02166   | 0.3024 | 1.0906 | 1.0786 | 0.0309 | 66.23 |
| 4  | 10669107  | rs7698375  | A | G | 4 | 0.3893    | 0.3034 | 0.9646 | 0.91   | 0.009  | 74.1  |
| 6  | 94846081  | rs583000   | C | T | 4 | 0.01297   | 0.3035 | 1.0916 | 1.0629 | 0.0837 | 54.94 |
| 6  | 26652089  | rs9461270  | A | G | 4 | 0.01293   | 0.3037 | 0.9103 | 0.9336 | 0.061  | 59.29 |
| 2  | 219038063 | rs664514   | A | G | 4 | 0.2047    | 0.3038 | 0.9549 | 0.9233 | 0.0154 | 71.19 |
| 3  | 124828079 | rs820451   | C | T | 4 | 0.04541   | 0.3041 | 1.094  | 1.1039 | 0.0111 | 73    |
| 16 | 53292008  | rs8044591  | A | C | 4 | 0.2023    | 0.3041 | 1.0486 | 1.0882 | 0.0094 | 73.85 |
| 11 | 106221180 | rs7944123  | A | G | 4 | 0.1521    | 0.3043 | 1.0595 | 1.0954 | 0.011  | 73.07 |
| 19 | 33606816  | rs17685204 | C | T | 4 | 0.4731    | 0.3043 | 1.0422 | 1.1451 | 0.0045 | 77.02 |
| 13 | 43970674  | rs9533877  | A | G | 3 | 0.002112  | 0.3045 | 0.605  | 0.731  | 0.1264 | 51.66 |
| 2  | 219217232 | rs3770214  | C | T | 4 | 0.241     | 0.3046 | 1.0429 | 1.0827 | 0.0134 | 72    |
| 13 | 85345072  | rs366815   | A | G | 4 | 0.6826    | 0.3046 | 0.9857 | 0.9151 | 0.0025 | 79.1  |
| 6  | 30192566  | rs12181054 | G | T | 4 | 0.016     | 0.3047 | 1.1914 | 1.1608 | 0.0248 | 67.96 |
| 2  | 17253381  | rs1589272  | A | G | 4 | 0.4178    | 0.3048 | 1.0375 | 1.1112 | 0.0088 | 74.16 |

|    |           |            |   |   |   |           |        |        |        |        |       |
|----|-----------|------------|---|---|---|-----------|--------|--------|--------|--------|-------|
| 20 | 58938883  | rs725475   | C | T | 4 | 0.11      | 0.3052 | 1.0578 | 1.0794 | 0.0145 | 71.53 |
| 1  | 115171509 | rs17536161 | A | G | 4 | 0.09509   | 0.3053 | 1.1569 | 1.2286 | 0.005  | 76.62 |
| 9  | 10624079  | rs10738172 | A | G | 4 | 0.2249    | 0.3053 | 1.0499 | 1.0995 | 0.0051 | 76.52 |
| 7  | 78880949  | rs10238315 | G | T | 4 | 0.4426    | 0.3055 | 0.9701 | 0.9108 | 0.0049 | 76.71 |
| 2  | 219109481 | rs578450   | C | T | 4 | 0.2322    | 0.3056 | 0.9578 | 0.9252 | 0.0172 | 70.51 |
| 6  | 94838264  | rs2535660  | C | T | 4 | 0.01287   | 0.3056 | 0.916  | 0.9408 | 0.0815 | 55.34 |
| 19 | 13277170  | rs8182538  | A | G | 4 | 0.003375  | 0.3056 | 1.1088 | 1.0661 | 0.0606 | 59.36 |
| 4  | 127238127 | rs4530647  | C | T | 4 | 0.1492    | 0.306  | 1.0738 | 1.112  | 0.0147 | 71.44 |
| 16 | 8571064   | rs3924628  | A | G | 4 | 0.008019  | 0.306  | 1.1001 | 1.0753 | 0.0263 | 67.51 |
| 7  | 97262856  | rs13245026 | A | G | 4 | 0.3267    | 0.3061 | 0.9512 | 0.8851 | 0.0038 | 77.64 |
| 19 | 37368934  | rs7260436  | A | C | 4 | 0.799     | 0.3061 | 1.0091 | 1.102  | 0.0007 | 82.34 |
| 11 | 106210532 | rs10890604 | A | G | 4 | 0.1273    | 0.3063 | 0.9404 | 0.9131 | 0.0103 | 73.4  |
| 12 | 114341431 | rs12306540 | A | G | 4 | 0.01328   | 0.3073 | 1.1082 | 1.0805 | 0.0462 | 62.47 |
| 5  | 105619351 | rs13154869 | G | T | 4 | 0.508     | 0.3074 | 0.9703 | 0.8773 | 0.0003 | 84.3  |
| 16 | 53289736  | rs11647205 | A | G | 4 | 0.2081    | 0.3076 | 1.0474 | 1.0866 | 0.0096 | 73.78 |
| 9  | 10614494  | rs10733210 | A | C | 4 | 0.2557    | 0.3078 | 1.0466 | 1.0971 | 0.0063 | 75.72 |
| 7  | 97304570  | rs17344459 | C | T | 4 | 0.3479    | 0.3079 | 0.9541 | 0.8864 | 0.0033 | 78.11 |
| 11 | 106217194 | rs10890608 | A | T | 4 | 0.1301    | 0.308  | 0.9408 | 0.9086 | 0.0055 | 76.29 |
| 2  | 30854671  | rs1568403  | A | G | 4 | 0.0002204 | 0.3082 | 1.1447 | 1.0837 | 0.0124 | 72.4  |
| 2  | 219131764 | rs4674314  | C | T | 4 | 0.2017    | 0.3084 | 0.9553 | 0.9242 | 0.0138 | 71.8  |
| 12 | 130839269 | rs10751693 | A | G | 4 | 0.02008   | 0.3084 | 0.9207 | 0.9391 | 0.0693 | 57.65 |
| 13 | 84081505  | rs9575613  | A | C | 4 | 0.2372    | 0.3084 | 0.9367 | 0.8821 | 0.0063 | 75.71 |
| 10 | 30434183  | rs7915293  | A | G | 4 | 0.000902  | 0.3087 | 0.8829 | 0.9309 | 0.0471 | 62.26 |
| 5  | 25917816  | rs1428660  | C | T | 4 | 0.6387    | 0.3088 | 0.9826 | 0.9075 | 0.0013 | 80.83 |
| 2  | 17261376  | rs11674840 | A | G | 4 | 0.434     | 0.3094 | 0.9655 | 0.9016 | 0.0088 | 74.17 |
| 6  | 94775217  | rs2129857  | C | T | 4 | 0.006583  | 0.3097 | 1.1015 | 1.0673 | 0.0546 | 60.61 |
| 2  | 172315540 | rs10166005 | C | T | 3 | 0.2206    | 0.3099 | 0.9524 | 0.8832 | 0.0003 | 87.6  |
| 6  | 15938880  | rs13218971 | C | T | 4 | 0.02947   | 0.31   | 0.8949 | 0.9066 | 0.0378 | 64.45 |
| 8  | 5526530   | rs2725673  | A | G | 4 | 0.1022    | 0.3101 | 0.9315 | 0.9107 | 0.0134 | 72    |
| 22 | 23895420  | rs7285325  | A | G | 4 | 0.4638    | 0.3103 | 0.9707 | 0.9134 | 0.0111 | 73.02 |
| 3  | 124794918 | rs1268623  | G | T | 4 | 0.03575   | 0.3106 | 1.1009 | 1.1035 | 0.0121 | 72.54 |
| 7  | 97259519  | rs2058106  | A | T | 4 | 0.3251    | 0.3109 | 1.0518 | 1.1283 | 0.0041 | 77.36 |
| 7  | 97269283  | rs459      | C | T | 4 | 0.3306    | 0.3109 | 0.9516 | 0.8859 | 0.0036 | 77.83 |
| 19 | 13277350  | rs4499352  | G | T | 4 | 0.003605  | 0.311  | 1.108  | 1.0654 | 0.0603 | 59.43 |
| 6  | 6092415   | rs7748376  | C | G | 4 | 0.01504   | 0.3111 | 0.8904 | 0.9178 | 0.0602 | 59.46 |
| 20 | 927720    | rs6039433  | C | T | 4 | 0.253     | 0.3111 | 1.0604 | 1.1635 | 0.0001 | 85.25 |
| 21 | 40059369  | rs12626544 | A | G | 3 | 0.0239    | 0.3115 | 0.9162 | 0.9249 | 0.0348 | 70.21 |

|    |           |            |   |   |   |          |        |        |        |        |       |
|----|-----------|------------|---|---|---|----------|--------|--------|--------|--------|-------|
| 2  | 229854835 | rs7579884  | A | G | 4 | 0.02336  | 0.312  | 0.8583 | 0.8717 | 0.0243 | 68.14 |
| 13 | 41469136  | rs7997862  | A | G | 4 | 0.1588   | 0.3125 | 1.0509 | 1.0818 | 0.01   | 73.54 |
| 13 | 84089937  | rs1446792  | A | G | 4 | 0.2502   | 0.3127 | 1.0663 | 1.1332 | 0.0062 | 75.74 |
| 7  | 97270302  | rs12669324 | C | T | 4 | 0.3394   | 0.313  | 1.0496 | 1.1285 | 0.0033 | 78.15 |
| 2  | 219104499 | rs7603816  | C | T | 4 | 0.2231   | 0.3137 | 1.0457 | 1.082  | 0.015  | 71.33 |
| 4  | 140857153 | rs11944843 | A | G | 4 | 0.5364   | 0.3144 | 1.0292 | 1.1164 | 0.0036 | 77.87 |
| 22 | 23885283  | rs16979674 | A | G | 4 | 0.4932   | 0.3144 | 0.9727 | 0.9144 | 0.0109 | 73.13 |
| 13 | 89218832  | rs7329978  | A | G | 4 | 0.2429   | 0.3146 | 0.8806 | 0.7875 | 0.007  | 75.23 |
| 18 | 8866666   | rs7236228  | T | C | 3 | 0.3781   | 0.3146 | 0.9588 | 0.865  | 0.0029 | 82.85 |
| 2  | 78149582  | rs17014922 | C | T | 4 | 0.009114 | 0.3152 | 1.1099 | 1.0963 | 0.0061 | 75.82 |
| 7  | 97262360  | rs993059   | C | T | 4 | 0.3417   | 0.3155 | 1.0497 | 1.1266 | 0.0041 | 77.38 |
| 12 | 130806294 | rs3741526  | C | T | 4 | 0.02228  | 0.3155 | 1.0847 | 1.0657 | 0.0591 | 59.68 |
| 9  | 2705284   | rs11793747 | C | G | 4 | 0.3608   | 0.3156 | 0.9662 | 0.9207 | 0.0116 | 72.77 |
| 5  | 114736927 | rs17137669 | A | G | 4 | 0.2912   | 0.3157 | 1.0669 | 1.1298 | 0.0194 | 69.7  |
| 2  | 184920491 | rs2198715  | C | T | 4 | 0.03017  | 0.3159 | 0.9079 | 0.9285 | 0.0879 | 54.17 |
| 7  | 97288397  | rs7808642  | G | T | 4 | 0.3593   | 0.3163 | 0.9551 | 0.8871 | 0.003  | 78.51 |
| 7  | 97274004  | rs7786920  | C | G | 4 | 0.3433   | 0.3164 | 0.9527 | 0.8862 | 0.0033 | 78.1  |
| 8  | 17547711  | rs1043883  | C | G | 4 | 0.191    | 0.3164 | 0.9532 | 0.9244 | 0.0124 | 72.44 |
| 8  | 14876643  | rs13261120 | C | T | 4 | 0.03261  | 0.3166 | 1.0815 | 1.0702 | 0.0429 | 63.22 |
| 18 | 57433136  | rs1377169  | A | G | 4 | 0.1951   | 0.3166 | 1.06   | 1.1038 | 0.0114 | 72.87 |
| 6  | 6090691   | rs1050783  | C | T | 4 | 0.02497  | 0.3167 | 0.902  | 0.9257 | 0.0859 | 54.52 |
| 5  | 105631852 | rs10479364 | C | T | 4 | 0.5491   | 0.3168 | 0.973  | 0.879  | 0.0002 | 84.47 |
| 1  | 199353517 | rs1536127  | A | C | 4 | 0.1668   | 0.317  | 1.0599 | 1.0919 | 0.0167 | 70.66 |
| 2  | 219242138 | rs2710246  | C | T | 4 | 0.2638   | 0.3173 | 0.9608 | 0.9237 | 0.0104 | 73.35 |
| 7  | 97259532  | rs2058105  | A | T | 4 | 0.3476   | 0.3175 | 0.9532 | 0.888  | 0.0041 | 77.41 |
| 7  | 97260570  | rs11764340 | A | C | 4 | 0.3476   | 0.3175 | 0.9532 | 0.888  | 0.0041 | 77.41 |
| 3  | 124821147 | rs820458   | C | T | 4 | 0.04824  | 0.3187 | 1.0927 | 1.1022 | 0.0096 | 73.76 |
| 7  | 97303824  | rs12668997 | C | T | 4 | 0.3858   | 0.3189 | 0.9578 | 0.889  | 0.0033 | 78.19 |
| 13 | 84102404  | rs9575621  | A | C | 4 | 0.2608   | 0.3194 | 1.0648 | 1.1318 | 0.006  | 75.92 |
| 7  | 97286690  | rs12704945 | A | T | 4 | 0.3605   | 0.3197 | 1.0468 | 1.1263 | 0.003  | 78.49 |
| 5  | 105504488 | rs4527577  | C | T | 4 | 0.6815   | 0.3199 | 1.0178 | 1.111  | 0.0022 | 79.41 |
| 2  | 5606908   | rs13390174 | C | T | 4 | 0.01699  | 0.3205 | 0.9204 | 0.9014 | 0.0001 | 85.93 |
| 15 | 86276360  | rs8041239  | A | G | 4 | 0.01394  | 0.3207 | 1.1154 | 1.0813 | 0.0565 | 60.21 |
| 1  | 75238998  | rs6693646  | G | T | 4 | 0.2424   | 0.321  | 1.0463 | 1.0942 | 0.0045 | 77.07 |
| 9  | 2705349   | rs11789876 | C | T | 4 | 0.3918   | 0.3212 | 1.0328 | 1.0885 | 0.0079 | 74.69 |
| 19 | 37369022  | rs7260548  | C | T | 4 | 0.8477   | 0.3213 | 0.9932 | 0.9124 | 0.0011 | 81.36 |
| 7  | 97297238  | rs2078467  | C | T | 4 | 0.3744   | 0.3215 | 1.0455 | 1.1258 | 0.003  | 78.52 |

|    |           |            |   |   |   |          |        |        |        |        |       |
|----|-----------|------------|---|---|---|----------|--------|--------|--------|--------|-------|
| 16 | 53288365  | rs7206354  | A | C | 4 | 0.2519   | 0.3215 | 0.959  | 0.923  | 0.0098 | 73.64 |
| 5  | 105596842 | rs7705866  | C | T | 4 | 0.5881   | 0.3216 | 1.0249 | 1.1325 | 0.0003 | 83.86 |
| 5  | 114739103 | rs10060558 | C | T | 4 | 0.3037   | 0.3216 | 1.0652 | 1.1293 | 0.018  | 70.21 |
| 5  | 105488872 | rs9327956  | C | T | 4 | 0.6043   | 0.3222 | 1.0244 | 1.1293 | 0.0007 | 82.25 |
| 18 | 5585958   | rs1539811  | C | T | 4 | 0.3087   | 0.3228 | 1.0385 | 1.1134 | 0.0001 | 85.38 |
| 6  | 83341774  | rs9361943  | G | A | 3 | 0.09819  | 0.3234 | 1.2517 | 1.3851 | 0.0075 | 79.56 |
| 2  | 184938744 | rs10200357 | A | T | 4 | 0.03604  | 0.3236 | 1.098  | 1.0758 | 0.0874 | 54.25 |
| 3  | 124801210 | rs861890   | A | G | 4 | 0.04621  | 0.3237 | 0.914  | 0.9083 | 0.0101 | 73.48 |
| 2  | 6830471   | rs17650774 | A | G | 4 | 0.3537   | 0.3239 | 0.9637 | 0.9084 | 0.0022 | 79.39 |
| 16 | 8571128   | rs3924627  | A | G | 4 | 0.00747  | 0.3242 | 0.9081 | 0.9311 | 0.0227 | 68.64 |
| 2  | 184951945 | rs12693375 | C | T | 4 | 0.03536  | 0.3244 | 1.0984 | 1.0759 | 0.0857 | 54.57 |
| 2  | 5606432   | rs2882274  | C | T | 4 | 0.01839  | 0.3249 | 0.9206 | 0.9027 | 0.0001 | 85.62 |
| 7  | 152433675 | rs760228   | C | T | 4 | 0.1414   | 0.3249 | 1.0558 | 1.093  | 0.0034 | 78.07 |
| 7  | 26559015  | rs12672384 | C | T | 4 | 0.6486   | 0.325  | 1.0195 | 1.1125 | 0.0012 | 81.11 |
| 13 | 21757408  | rs2038711  | C | T | 4 | 0.03088  | 0.3251 | 0.9253 | 0.9339 | 0.0334 | 65.56 |
| 2  | 155411314 | rs1900132  | A | G | 4 | 0.02616  | 0.3253 | 1.0889 | 1.0702 | 0.0559 | 60.34 |
| 4  | 140897320 | rs3796632  | C | T | 4 | 0.06857  | 0.3254 | 1.2119 | 1.2609 | 0.0171 | 70.53 |
| 14 | 78058257  | rs11622407 | G | T | 4 | 0.2391   | 0.3254 | 1.0424 | 1.0751 | 0.0167 | 70.66 |
| 5  | 105575000 | rs10073985 | C | T | 4 | 0.5896   | 0.3258 | 0.9749 | 0.882  | 0.0004 | 83.33 |
| 20 | 58927301  | rs2426960  | A | G | 4 | 0.08209  | 0.3261 | 1.0627 | 1.0797 | 0.0086 | 74.28 |
| 6  | 99005968  | rs3123337  | C | T | 4 | 0.004916 | 0.3262 | 0.7623 | 0.8413 | 0.0372 | 64.58 |
| 6  | 117192477 | rs693602   | A | C | 4 | 0.04421  | 0.3262 | 0.9277 | 0.9271 | 0.0219 | 68.87 |
| 3  | 124810365 | rs4530474  | C | T | 4 | 0.04854  | 0.3264 | 1.0926 | 1.1011 | 0.009  | 74.07 |
| 5  | 105490206 | rs1435195  | C | G | 4 | 0.6615   | 0.3278 | 1.0203 | 1.134  | 0.0002 | 84.47 |
| 10 | 6544142   | rs678304   | C | G | 4 | 0.2883   | 0.3279 | 1.0423 | 1.0885 | 0.0086 | 74.28 |
| 3  | 124806457 | rs848146   | C | G | 4 | 0.05019  | 0.3284 | 1.092  | 1.1034 | 0.0068 | 75.37 |
| 1  | 205560841 | rs6685886  | A | C | 3 | 0.3779   | 0.3288 | 1.0334 | 1.1015 | 0.0027 | 83.12 |
| 16 | 7338583   | rs9936914  | A | T | 4 | 0.01453  | 0.3288 | 1.1536 | 1.1035 | 0.0753 | 56.49 |
| 3  | 102125413 | rs7431835  | A | T | 4 | 0.56     | 0.3294 | 1.0291 | 1.1895 | 0      | 90.69 |
| 3  | 124830480 | rs820448   | C | G | 4 | 0.05226  | 0.3298 | 0.9161 | 0.9072 | 0.0078 | 74.74 |
| 14 | 78048581  | rs11626916 | A | G | 4 | 0.2469   | 0.3298 | 0.96   | 0.9309 | 0.0172 | 70.49 |
| 7  | 152440071 | rs760229   | A | G | 4 | 0.1168   | 0.3301 | 0.9435 | 0.9184 | 0.0048 | 76.76 |
| 3  | 102252014 | rs13099753 | C | G | 4 | 0.44     | 0.3304 | 0.9653 | 0.8592 | 0      | 89.48 |
| 3  | 102130439 | rs2576377  | C | T | 4 | 0.5773   | 0.3305 | 1.0271 | 1.1938 | 0      | 91.5  |
| 5  | 175193656 | rs10061059 | A | G | 4 | 0.02279  | 0.3306 | 0.9077 | 0.9282 | 0.0565 | 60.23 |
| 14 | 94460547  | rs3861665  | A | G | 4 | 0.4271   | 0.3307 | 1.0373 | 1.1125 | 0.0066 | 75.51 |
| 22 | 33922689  | rs4821376  | A | G | 4 | 0.04027  | 0.3308 | 1.0822 | 1.0746 | 0.0351 | 65.12 |

|    |           |            |   |   |   |          |        |        |        |        |       |
|----|-----------|------------|---|---|---|----------|--------|--------|--------|--------|-------|
| 14 | 78050487  | rs727208   | A | C | 4 | 0.2492   | 0.3311 | 1.0414 | 1.0744 | 0.0164 | 70.8  |
| 22 | 33934502  | rs3918439  | C | G | 4 | 0.04089  | 0.3311 | 0.9242 | 0.9311 | 0.0378 | 64.44 |
| 20 | 58941909  | rs6071442  | C | T | 4 | 0.1136   | 0.3312 | 0.9458 | 0.9288 | 0.0123 | 72.49 |
| 2  | 184931648 | rs17429535 | C | T | 4 | 0.03331  | 0.3314 | 0.91   | 0.9301 | 0.0814 | 55.35 |
| 22 | 33936111  | rs5999766  | C | T | 4 | 0.04101  | 0.3317 | 0.9242 | 0.9312 | 0.0379 | 64.42 |
| 2  | 184932641 | rs10203961 | C | T | 4 | 0.03302  | 0.3318 | 1.099  | 1.0752 | 0.0807 | 55.48 |
| 5  | 105596450 | rs10040995 | C | T | 4 | 0.6351   | 0.3318 | 0.9786 | 0.8848 | 0.0003 | 84.01 |
| 19 | 13277280  | rs4433935  | C | T | 4 | 0.004548 | 0.3319 | 0.9048 | 0.9409 | 0.0589 | 59.73 |
| 4  | 71017595  | rs1709257  | A | C | 4 | 0.1044   | 0.3321 | 1.1771 | 1.2549 | 0.003  | 78.44 |
| 1  | 199354868 | rs7547762  | A | G | 4 | 0.183    | 0.3325 | 0.9469 | 0.9141 | 0.0074 | 75.02 |
| 7  | 78868858  | rs4730806  | A | C | 4 | 0.5606   | 0.3326 | 0.9776 | 0.9187 | 0.0069 | 75.29 |
| 20 | 49473493  | rs6067766  | A | G | 4 | 0.5369   | 0.3328 | 0.9639 | 0.8808 | 0.0141 | 71.69 |
| 22 | 33922615  | rs4821375  | C | T | 4 | 0.04068  | 0.3328 | 1.0821 | 1.0742 | 0.0354 | 65.05 |
| 3  | 124812622 | rs2626028  | C | T | 4 | 0.05099  | 0.3329 | 1.0916 | 1.1009 | 0.008  | 74.66 |
| 3  | 102160572 | rs2595894  | C | G | 4 | 0.5532   | 0.3331 | 0.9713 | 0.8441 | 0      | 90.43 |
| 7  | 152436044 | rs498474   | A | G | 4 | 0.1104   | 0.3331 | 0.9408 | 0.9128 | 0.0029 | 78.58 |
| 7  | 152436388 | rs594243   | C | T | 4 | 0.1121   | 0.3333 | 1.0626 | 1.0953 | 0.0029 | 78.52 |
| 3  | 27918162  | rs2618115  | A | G | 4 | 0.04726  | 0.3336 | 0.8907 | 0.9051 | 0.0571 | 60.09 |
| 3  | 102159700 | rs2576391  | C | G | 4 | 0.5597   | 0.3341 | 1.029  | 1.1842 | 0      | 90.42 |
| 3  | 102172552 | rs10511181 | G | T | 4 | 0.5676   | 0.3341 | 1.0284 | 1.1843 | 0      | 90.43 |
| 7  | 152435872 | rs496724   | A | G | 4 | 0.1119   | 0.3342 | 1.0626 | 1.0954 | 0.0029 | 78.62 |
| 1  | 119091517 | rs2147780  | A | G | 3 | 0.03253  | 0.3343 | 1.2536 | 1.2369 | 0.0336 | 70.53 |
| 9  | 10654583  | rs10756092 | A | C | 4 | 0.3994   | 0.3344 | 0.9584 | 0.8818 | 0.001  | 81.67 |
| 22 | 33921035  | rs134434   | A | G | 4 | 0.04092  | 0.3345 | 1.082  | 1.074  | 0.0351 | 65.11 |
| 8  | 54439800  | rs7465458  | A | G | 4 | 0.01324  | 0.3346 | 1.1248 | 1.0914 | 0.0354 | 65.04 |
| 3  | 124805854 | rs820479   | A | G | 4 | 0.05159  | 0.3349 | 0.9163 | 0.9089 | 0.0081 | 74.58 |
| 7  | 152436337 | rs593874   | A | G | 4 | 0.1149   | 0.335  | 1.0621 | 1.095  | 0.0029 | 78.52 |
| 14 | 78048416  | rs11159368 | A | C | 4 | 0.2562   | 0.335  | 0.9608 | 0.9314 | 0.0167 | 70.67 |
| 3  | 102130617 | rs13060137 | A | G | 4 | 0.5982   | 0.3351 | 0.9744 | 0.8424 | 0      | 90.69 |
| 3  | 102127637 | rs17284842 | C | T | 4 | 0.5989   | 0.3353 | 1.0262 | 1.187  | 0      | 90.69 |
| 1  | 75241712  | rs12750340 | C | T | 4 | 0.2745   | 0.3355 | 0.958  | 0.9168 | 0.0055 | 76.27 |
| 3  | 102132997 | rs13077353 | G | T | 4 | 0.6001   | 0.3355 | 1.0261 | 1.1867 | 0      | 90.67 |
| 10 | 6544132   | rs604663   | C | T | 4 | 0.2729   | 0.3357 | 0.9624 | 0.9264 | 0.0073 | 75.07 |
| 7  | 26560257  | rs12670740 | C | T | 4 | 0.6474   | 0.3359 | 0.9808 | 0.904  | 0.0019 | 79.86 |
| 1  | 119091964 | rs6704254  | C | T | 3 | 0.03286  | 0.336  | 1.253  | 1.2364 | 0.0332 | 70.63 |
| 3  | 102125494 | rs1036467  | C | T | 4 | 0.6037   | 0.336  | 0.9748 | 0.8426 | 0      | 90.69 |
| 9  | 10655040  | rs4272438  | A | T | 4 | 0.4045   | 0.336  | 0.9588 | 0.882  | 0.0009 | 81.71 |

|    |           |            |   |   |   |           |        |        |        |        |       |
|----|-----------|------------|---|---|---|-----------|--------|--------|--------|--------|-------|
| 1  | 75235049  | rs3912426  | A | G | 4 | 0.2848    | 0.3362 | 1.0422 | 1.091  | 0.0045 | 77.01 |
| 6  | 94846661  | rs2535672  | A | G | 4 | 0.01335   | 0.3363 | 0.9162 | 0.943  | 0.0748 | 56.59 |
| 20 | 19705555  | rs6035436  | C | G | 4 | 0.227     | 0.3363 | 0.9297 | 0.8744 | 0.004  | 77.45 |
| 11 | 9273306   | rs4396289  | C | T | 4 | 0.04061   | 0.3365 | 1.1023 | 1.1032 | 0.0113 | 72.92 |
| 7  | 152436277 | rs593793   | A | G | 4 | 0.1159    | 0.3366 | 0.9417 | 0.9134 | 0.0029 | 78.58 |
| 3  | 102178032 | rs17398684 | A | G | 4 | 0.5843    | 0.3367 | 1.0272 | 1.1832 | 0      | 90.43 |
| 8  | 54436653  | rs7001769  | C | T | 4 | 0.01604   | 0.3367 | 0.892  | 0.9178 | 0.0397 | 63.96 |
| 3  | 29757722  | rs17024316 | C | G | 4 | 0.3014    | 0.3371 | 0.9628 | 0.9263 | 0.0105 | 73.31 |
| 3  | 102170772 | rs13088524 | A | C | 4 | 0.5878    | 0.3371 | 0.9737 | 0.8451 | 0      | 90.45 |
| 6  | 94798859  | rs2129859  | A | C | 4 | 0.01234   | 0.3373 | 1.0924 | 1.0604 | 0.0716 | 57.2  |
| 9  | 10654367  | rs4262363  | A | G | 4 | 0.3935    | 0.3373 | 1.044  | 1.1335 | 0.0009 | 81.84 |
| 16 | 26654324  | rs500285   | C | G | 4 | 0.03159   | 0.3373 | 0.8445 | 0.8646 | 0.0306 | 66.3  |
| 3  | 102155597 | rs17398421 | G | T | 4 | 0.581     | 0.3374 | 1.0275 | 1.1829 | 0      | 90.43 |
| 14 | 78048235  | rs10782463 | C | T | 4 | 0.2616    | 0.338  | 1.0404 | 1.073  | 0.0169 | 70.59 |
| 2  | 184940461 | rs13015290 | A | T | 4 | 0.03771   | 0.3382 | 0.9115 | 0.9307 | 0.0811 | 55.41 |
| 9  | 10651622  | rs7030381  | A | G | 4 | 0.3941    | 0.3382 | 1.0429 | 1.1305 | 0.0009 | 81.85 |
| 17 | 24496369  | rs12452739 | A | G | 4 | 0.3801    | 0.3384 | 0.9654 | 0.9194 | 0.0107 | 73.23 |
| 3  | 102150519 | rs2576382  | A | T | 4 | 0.5981    | 0.3385 | 0.9744 | 0.8437 | 0      | 90.67 |
| 14 | 78048326  | rs11159367 | A | G | 4 | 0.2626    | 0.3385 | 0.9613 | 0.932  | 0.017  | 70.55 |
| 3  | 144996927 | rs11706302 | A | G | 3 | 0.0004623 | 0.3386 | 0.8403 | 0.8993 | 0.0175 | 75.28 |
| 2  | 98846759  | rs4851164  | C | T | 4 | 0.0449    | 0.3388 | 0.8641 | 0.8687 | 0.0167 | 70.69 |
| 7  | 152434353 | rs672366   | C | G | 4 | 0.1097    | 0.3388 | 0.9407 | 0.9134 | 0.0027 | 78.81 |
| 9  | 10651798  | rs7030672  | C | G | 4 | 0.3997    | 0.3388 | 1.0426 | 1.1307 | 0.0009 | 81.75 |
| 1  | 75219251  | rs2346344  | G | T | 4 | 0.2872    | 0.3389 | 0.9597 | 0.9163 | 0.004  | 77.43 |
| 6  | 6092368   | rs7748218  | C | T | 4 | 0.02707   | 0.3389 | 0.9033 | 0.9281 | 0.0801 | 55.6  |
| 9  | 10652358  | rs7034568  | C | T | 4 | 0.4031    | 0.3389 | 1.0426 | 1.1317 | 0.0009 | 81.81 |
| 3  | 102160532 | rs2595893  | C | T | 4 | 0.5918    | 0.339  | 1.0267 | 1.1823 | 0      | 90.44 |
| 5  | 13541819  | rs3853117  | C | T | 4 | 0.007902  | 0.3391 | 0.8687 | 0.8631 | 0.0001 | 85.45 |
| 13 | 84112297  | rs13378761 | A | C | 4 | 0.2979    | 0.3391 | 1.0598 | 1.13   | 0.0042 | 77.25 |
| 3  | 178791718 | rs552757   | A | G | 4 | 0.03495   | 0.3393 | 0.9252 | 0.935  | 0.0371 | 64.61 |
| 9  | 10651370  | rs10756088 | A | G | 4 | 0.3986    | 0.3394 | 0.9593 | 0.8848 | 0.0009 | 81.84 |
| 9  | 10652166  | rs7019756  | C | T | 4 | 0.4095    | 0.3395 | 0.9599 | 0.8844 | 0.0009 | 81.76 |
| 2  | 105447653 | rs9989768  | C | T | 4 | 0.05253   | 0.3396 | 1.1438 | 1.1563 | 0.0099 | 73.63 |
| 6  | 6092904   | rs7772909  | C | T | 4 | 0.0267    | 0.3401 | 1.1073 | 1.0775 | 0.0788 | 55.84 |
| 2  | 78148150  | rs17014915 | C | T | 4 | 0.01122   | 0.3402 | 1.1068 | 1.0926 | 0.0053 | 76.41 |
| 12 | 104624341 | rs11833072 | C | T | 4 | 0.2203    | 0.3404 | 0.9532 | 0.9183 | 0.0061 | 75.82 |
| 18 | 57455551  | rs12457154 | A | G | 4 | 0.2524    | 0.3405 | 1.0532 | 1.0976 | 0.0138 | 71.81 |

|    |           |            |   |   |   |          |        |        |        |        |       |
|----|-----------|------------|---|---|---|----------|--------|--------|--------|--------|-------|
| 1  | 75199985  | rs11162286 | A | G | 4 | 0.3131   | 0.3406 | 1.0398 | 1.0912 | 0.004  | 77.47 |
| 14 | 78085918  | rs10483907 | A | G | 4 | 0.2673   | 0.3406 | 1.0399 | 1.0735 | 0.0153 | 71.2  |
| 22 | 33926311  | rs4618151  | A | C | 4 | 0.04395  | 0.3406 | 0.9253 | 0.9326 | 0.0378 | 64.45 |
| 9  | 10649290  | rs4641116  | C | T | 4 | 0.3828   | 0.3407 | 0.9582 | 0.8857 | 0.0008 | 81.96 |
| 2  | 38204318  | rs3795980  | G | T | 4 | 0.009445 | 0.341  | 0.8745 | 0.897  | 0.0091 | 74    |
| 6  | 6089856   | rs3024466  | A | C | 4 | 0.02889  | 0.3412 | 1.1057 | 1.0767 | 0.0823 | 55.18 |
| 2  | 160112937 | rs6742654  | C | T | 4 | 0.01718  | 0.3414 | 1.1415 | 1.0995 | 0.0516 | 61.27 |
| 15 | 52099177  | rs12592703 | C | T | 4 | 0.6946   | 0.3414 | 0.9832 | 0.9014 | 0.0015 | 80.49 |
| 20 | 19724391  | rs16981125 | A | G | 4 | 0.2517   | 0.3414 | 0.9336 | 0.8748 | 0.0035 | 77.97 |
| 18 | 57455491  | rs12454424 | A | G | 4 | 0.2544   | 0.3418 | 0.9497 | 0.9113 | 0.0138 | 71.82 |
| 5  | 175189132 | rs1863931  | A | G | 4 | 0.02586  | 0.3419 | 0.9083 | 0.9289 | 0.0571 | 60.1  |
| 17 | 12110529  | rs16945798 | G | A | 3 | 0.7056   | 0.3425 | 0.9694 | 0.7524 | 0.0014 | 84.7  |
| 17 | 12103857  | rs714422   | A | G | 3 | 0.7377   | 0.3426 | 0.9729 | 0.7513 | 0.0013 | 84.94 |
| 3  | 102248274 | rs13074729 | G | T | 4 | 0.4108   | 0.3427 | 0.9595 | 0.8483 | 0      | 89.76 |
| 22 | 33933022  | rs738440   | C | T | 4 | 0.04414  | 0.3427 | 1.0807 | 1.0726 | 0.0358 | 64.94 |
| 4  | 116592228 | rs6533889  | G | T | 4 | 0.6026   | 0.3429 | 0.9811 | 0.9203 | 0.0037 | 77.8  |
| 18 | 57445327  | rs12454307 | C | T | 4 | 0.2412   | 0.343  | 0.9487 | 0.9093 | 0.0094 | 73.85 |
| 9  | 119033609 | rs12237890 | A | T | 4 | 0.009334 | 0.3434 | 1.2195 | 1.1463 | 0.0448 | 62.78 |
| 11 | 106389222 | rs11212007 | A | C | 4 | 0.146    | 0.3434 | 0.9404 | 0.9124 | 0.0069 | 75.31 |
| 4  | 114747468 | rs6857556  | A | G | 4 | 0.3487   | 0.3435 | 1.069  | 1.1506 | 0.0125 | 72.4  |
| 9  | 10658198  | rs7045753  | C | T | 4 | 0.4084   | 0.3438 | 0.958  | 0.8817 | 0.001  | 81.58 |
| 3  | 44994064  | rs4683014  | A | G | 4 | 0.2705   | 0.344  | 0.9624 | 0.9304 | 0.0115 | 72.82 |
| 4  | 13358506  | rs4698460  | G | T | 4 | 0.4235   | 0.3446 | 0.9674 | 0.9131 | 0.0063 | 75.66 |
| 8  | 17545472  | rs3817664  | G | T | 4 | 0.2276   | 0.3447 | 1.0459 | 1.0792 | 0.0106 | 73.24 |
| 1  | 75215582  | rs7522882  | A | T | 4 | 0.3053   | 0.3448 | 0.9611 | 0.9174 | 0.0041 | 77.36 |
| 18 | 57438389  | rs11876431 | A | G | 4 | 0.2409   | 0.3449 | 1.0541 | 1.097  | 0.0123 | 72.48 |
| 14 | 42258065  | rs10498375 | A | C | 4 | 0.1188   | 0.3454 | 0.8975 | 0.8597 | 0.0058 | 76.06 |
| 1  | 55469135  | rs7512894  | A | G | 4 | 0.007617 | 0.3456 | 0.8896 | 0.9272 | 0.0507 | 61.45 |
| 7  | 26566825  | rs12671326 | C | T | 4 | 0.6716   | 0.3461 | 0.9822 | 0.9087 | 0.003  | 78.5  |
| 10 | 85963395  | rs10887256 | C | G | 4 | 0.06447  | 0.3461 | 0.926  | 0.9213 | 0.0174 | 70.44 |
| 14 | 78086868  | rs1015964  | A | G | 4 | 0.2703   | 0.3461 | 0.9616 | 0.9317 | 0.0148 | 71.4  |
| 4  | 116462047 | rs1507942  | A | T | 4 | 0.3188   | 0.3463 | 1.039  | 1.0812 | 0.0111 | 73.03 |
| 22 | 33925331  | rs134442   | C | T | 4 | 0.04492  | 0.3467 | 1.0803 | 1.072  | 0.0352 | 65.09 |
| 14 | 78087589  | rs2098518  | C | G | 4 | 0.2496   | 0.347  | 0.9599 | 0.9273 | 0.0074 | 74.98 |
| 20 | 19708160  | rs17298185 | A | G | 4 | 0.2455   | 0.3471 | 1.0725 | 1.1413 | 0.0037 | 77.76 |
| 21 | 16556290  | rs2823718  | A | G | 4 | 0.03722  | 0.3471 | 1.0768 | 1.0892 | 0.0014 | 80.78 |
| 7  | 48310276  | rs6943725  | A | G | 4 | 0.3818   | 0.3475 | 1.0312 | 1.0764 | 0.0095 | 73.81 |

|    |           |            |   |   |   |         |        |        |        |        |       |
|----|-----------|------------|---|---|---|---------|--------|--------|--------|--------|-------|
| 1  | 75222180  | rs3845358  | A | C | 4 | 0.3149  | 0.3479 | 1.0396 | 1.0892 | 0.0042 | 77.25 |
| 17 | 12108360  | rs12150546 | G | A | 3 | 0.7835  | 0.3482 | 0.9779 | 0.7535 | 0.0013 | 84.97 |
| 4  | 92459915  | rs6816636  | A | C | 4 | 0.3216  | 0.3488 | 1.0422 | 1.1062 | 0.0014 | 80.73 |
| 3  | 102108512 | rs13072000 | A | G | 4 | 0.5664  | 0.3489 | 0.9722 | 0.8452 | 0      | 90.85 |
| 8  | 32646497  | rs2919390  | A | C | 4 | 0.3037  | 0.3489 | 1.0375 | 1.0905 | 0.0014 | 80.65 |
| 10 | 125987432 | rs4303189  | A | G | 4 | 0.3745  | 0.3489 | 1.0874 | 1.2037 | 0.0111 | 73.02 |
| 18 | 5575158   | rs1719934  | A | G | 4 | 0.4445  | 0.349  | 1.0277 | 1.0983 | 0.0003 | 83.84 |
| 3  | 102102450 | rs4928096  | A | G | 4 | 0.5597  | 0.3494 | 0.9719 | 0.8456 | 0      | 90.91 |
| 3  | 102105082 | rs9832195  | A | C | 4 | 0.551   | 0.3494 | 1.0297 | 1.183  | 0      | 90.88 |
| 18 | 64661900  | rs9962491  | C | T | 4 | 0.02016 | 0.3495 | 0.9128 | 0.935  | 0.0503 | 61.54 |
| 5  | 16935090  | rs16869212 | A | G | 4 | 0.01498 | 0.3496 | 1.1789 | 1.1476 | 0.0117 | 72.75 |
| 5  | 105458740 | rs1991970  | A | C | 4 | 0.7043  | 0.3496 | 1.0179 | 1.1251 | 0.0005 | 83.05 |
| 3  | 102107128 | rs2713787  | C | G | 4 | 0.5546  | 0.3501 | 0.9714 | 0.8453 | 0      | 90.91 |
| 15 | 31694343  | rs11637847 | A | G | 4 | 0.6686  | 0.3501 | 0.9848 | 0.928  | 0.0087 | 74.25 |
| 4  | 116558768 | rs6847969  | A | G | 4 | 0.4548  | 0.3502 | 0.9734 | 0.9252 | 0.0058 | 76.04 |
| 6  | 94798998  | rs2171518  | C | T | 4 | 0.01296 | 0.3503 | 0.9161 | 0.9443 | 0.0684 | 57.82 |
| 7  | 152452942 | rs4726247  | A | G | 4 | 0.1055  | 0.3504 | 0.9418 | 0.9198 | 0.0035 | 77.91 |
| 5  | 105649426 | rs13361333 | C | T | 4 | 0.4767  | 0.3505 | 1.0342 | 1.1175 | 0.0017 | 80.22 |
| 3  | 102107251 | rs4060963  | A | G | 4 | 0.5573  | 0.3506 | 1.0293 | 1.1828 | 0      | 90.91 |
| 22 | 33903856  | rs134386   | C | T | 4 | 0.04541 | 0.3506 | 1.0801 | 1.0735 | 0.0285 | 66.89 |
| 5  | 105632419 | rs6883970  | C | T | 4 | 0.6594  | 0.3507 | 0.9809 | 0.903  | 0.0018 | 79.96 |
| 3  | 102101864 | rs2713793  | A | G | 4 | 0.5474  | 0.3508 | 1.0302 | 1.1822 | 0      | 90.75 |
| 3  | 102104116 | rs2576365  | A | C | 4 | 0.5598  | 0.3509 | 0.9718 | 0.8455 | 0      | 90.91 |
| 4  | 149810031 | rs2358469  | A | G | 4 | 0.03947 | 0.3509 | 0.9248 | 0.9358 | 0.0394 | 64.05 |
| 5  | 105644816 | rs6891526  | A | G | 4 | 0.6472  | 0.3513 | 1.0203 | 1.1086 | 0.0017 | 80.22 |
| 14 | 78053255  | rs11629123 | C | T | 4 | 0.266   | 0.3514 | 0.9615 | 0.928  | 0.0069 | 75.32 |
| 3  | 102112831 | rs13079002 | C | T | 4 | 0.5844  | 0.3515 | 0.9735 | 0.8455 | 0      | 90.9  |
| 6  | 6095762   | rs4960167  | C | T | 4 | 0.0255  | 0.3515 | 0.9024 | 0.9279 | 0.0675 | 58    |
| 2  | 98853280  | rs17022034 | A | T | 4 | 0.04659 | 0.3516 | 0.8646 | 0.8704 | 0.0152 | 71.26 |
| 13 | 84114641  | rs9602525  | A | T | 4 | 0.3113  | 0.3516 | 1.0582 | 1.1271 | 0.0041 | 77.35 |
| 2  | 83399672  | rs12232909 | A | G | 4 | 0.4005  | 0.3517 | 0.9709 | 0.9282 | 0.007  | 75.22 |
| 2  | 219004789 | rs17572485 | A | G | 4 | 0.2214  | 0.3517 | 0.9571 | 0.9289 | 0.0112 | 72.97 |
| 3  | 102100845 | rs2576369  | A | G | 4 | 0.5517  | 0.3517 | 0.971  | 0.8462 | 0      | 90.73 |
| 3  | 102101463 | rs2245266  | C | T | 4 | 0.5517  | 0.3517 | 0.971  | 0.8462 | 0      | 90.73 |
| 22 | 33870423  | rs5999742  | A | G | 4 | 0.02082 | 0.3523 | 1.0958 | 1.0886 | 0.0061 | 75.86 |
| 9  | 10647332  | rs4578000  | A | G | 4 | 0.3879  | 0.3526 | 0.9585 | 0.8879 | 0.0008 | 81.94 |
| 21 | 29968170  | rs363550   | C | G | 4 | 0.2645  | 0.3526 | 0.8985 | 0.834  | 0.0167 | 70.67 |



|    |           |            |   |   |   |          |        |        |        |        |       |
|----|-----------|------------|---|---|---|----------|--------|--------|--------|--------|-------|
| 12 | 114335802 | rs768860   | G | T | 4 | 0.01217  | 0.3527 | 1.1104 | 1.0757 | 0.0373 | 64.57 |
| 3  | 102111994 | rs2713782  | A | G | 4 | 0.5822   | 0.3528 | 0.9732 | 0.8457 | 0      | 90.85 |
| 8  | 140497987 | rs9324508  | A | G | 4 | 0.5588   | 0.353  | 1.0246 | 1.0914 | 0.0066 | 75.52 |
| 20 | 58942206  | rs6128962  | A | G | 4 | 0.1338   | 0.353  | 0.9485 | 0.9314 | 0.0115 | 72.84 |
| 5  | 105507616 | rs12719550 | A | T | 4 | 0.6796   | 0.3531 | 0.9807 | 0.889  | 0.0005 | 82.93 |
| 20 | 58926954  | rs2024676  | A | G | 4 | 0.1149   | 0.3531 | 1.0571 | 1.0754 | 0.0089 | 74.13 |
| 4  | 116502459 | rs10000358 | A | G | 4 | 0.446    | 0.3532 | 1.0281 | 1.0796 | 0.0069 | 75.32 |
| 12 | 114336692 | rs7964025  | A | G | 4 | 0.01256  | 0.3534 | 0.901  | 0.9299 | 0.038  | 64.39 |
| 9  | 10645642  | rs10756076 | A | G | 4 | 0.3915   | 0.3535 | 1.043  | 1.1254 | 0.0009 | 81.77 |
| 6  | 30203582  | rs10947056 | C | G | 4 | 0.01694  | 0.3536 | 0.8409 | 0.8729 | 0.0218 | 68.91 |
| 9  | 10645189  | rs10809145 | A | G | 4 | 0.3913   | 0.3541 | 1.0433 | 1.1253 | 0.001  | 81.65 |
| 20 | 19730288  | rs17298654 | G | T | 4 | 0.265    | 0.3542 | 1.0689 | 1.1371 | 0.0041 | 77.34 |
| 2  | 98860167  | rs4851166  | C | T | 4 | 0.03914  | 0.3546 | 0.858  | 0.8722 | 0.0185 | 70.04 |
| 6  | 25280013  | rs6910965  | C | G | 4 | 0.003173 | 0.3547 | 0.8749 | 0.9208 | 0.0265 | 67.47 |
| 6  | 30134215  | rs12208867 | A | G | 4 | 0.005102 | 0.3547 | 1.2336 | 1.1631 | 0.0099 | 73.61 |
| 12 | 130809881 | rs10751692 | C | T | 4 | 0.02612  | 0.3547 | 0.924  | 0.9423 | 0.0538 | 60.8  |
| 4  | 116514942 | rs7436414  | A | G | 4 | 0.4544   | 0.3553 | 0.9732 | 0.9266 | 0.0068 | 75.33 |
| 7  | 152436269 | rs521309   | A | G | 4 | 0.1048   | 0.3553 | 0.9369 | 0.9141 | 0.004  | 77.51 |
| 9  | 10629445  | rs4741044  | A | G | 4 | 0.3948   | 0.3553 | 0.9588 | 0.8915 | 0.0014 | 80.65 |
| 21 | 16557827  | rs2823722  | C | T | 4 | 0.05508  | 0.3554 | 0.9314 | 0.9149 | 0.001  | 81.54 |
| 2  | 30848531  | rs4952179  | C | T | 4 | 0.003139 | 0.3558 | 0.8925 | 0.9317 | 0.0272 | 67.26 |
| 1  | 48877073  | rs12562662 | C | T | 4 | 0.5069   | 0.3559 | 1.0493 | 1.1632 | 0.0054 | 76.33 |
| 4  | 116481279 | rs12650886 | C | T | 4 | 0.4281   | 0.3563 | 1.0292 | 1.0772 | 0.0088 | 74.16 |
| 7  | 26562895  | rs2286180  | C | G | 4 | 0.7205   | 0.3565 | 1.0152 | 1.0993 | 0.0026 | 78.95 |
| 13 | 84121490  | rs9565956  | C | T | 4 | 0.3346   | 0.3567 | 1.0554 | 1.127  | 0.0037 | 77.78 |
| 1  | 48896154  | rs7556311  | A | G | 4 | 0.2484   | 0.3568 | 1.092  | 1.1679 | 0.0075 | 74.95 |
| 20 | 19725525  | rs6136836  | C | T | 4 | 0.281    | 0.3571 | 1.0667 | 1.1391 | 0.0031 | 78.31 |
| 4  | 92459825  | rs6532289  | C | T | 4 | 0.3147   | 0.3575 | 0.9612 | 0.9118 | 0.0018 | 80.01 |
| 4  | 116537368 | rs6533870  | A | G | 4 | 0.4801   | 0.3575 | 1.0258 | 1.0801 | 0.0054 | 76.34 |
| 7  | 152437650 | rs2018083  | A | G | 4 | 0.1222   | 0.3576 | 1.059  | 1.0852 | 0.0039 | 77.54 |
| 12 | 51731549  | rs10747658 | A | G | 4 | 0.09068  | 0.3576 | 0.9393 | 0.921  | 0.0064 | 75.64 |
| 12 | 128847165 | rs10773708 | A | G | 4 | 0.04136  | 0.3576 | 0.925  | 0.934  | 0.0331 | 65.63 |
| 4  | 116501880 | rs7437909  | C | T | 4 | 0.4589   | 0.3577 | 0.9734 | 0.9268 | 0.0067 | 75.43 |
| 9  | 10647075  | rs4587381  | G | T | 4 | 0.4029   | 0.3578 | 1.042  | 1.1252 | 0.0008 | 82.06 |
| 14 | 78035507  | rs1122840  | A | G | 4 | 0.2696   | 0.3583 | 1.0399 | 1.0754 | 0.0084 | 74.41 |
| 22 | 33932582  | rs7284380  | A | G | 4 | 0.04899  | 0.3583 | 1.0788 | 1.0708 | 0.0334 | 65.55 |
| 2  | 38406957  | rs6745929  | C | T | 4 | 0.4742   | 0.3584 | 1.0295 | 1.1146 | 0.0002 | 84.93 |

|    |           |            |   |   |   |         |        |        |        |        |       |
|----|-----------|------------|---|---|---|---------|--------|--------|--------|--------|-------|
| 5  | 105495362 | rs972529   | A | C | 4 | 0.7036  | 0.3587 | 0.9822 | 0.8896 | 0.0005 | 83.16 |
| 13 | 89217299  | rs10851281 | A | G | 4 | 0.2728  | 0.3588 | 0.8876 | 0.8041 | 0.0068 | 75.36 |
| 9  | 10645366  | rs10809147 | C | T | 4 | 0.4054  | 0.359  | 0.9597 | 0.8894 | 0.0009 | 81.77 |
| 13 | 89220997  | rs6492451  | C | T | 4 | 0.2852  | 0.359  | 1.1235 | 1.2432 | 0.0072 | 75.11 |
| 3  | 102098826 | rs2245473  | A | G | 4 | 0.5735  | 0.3595 | 0.9724 | 0.8481 | 0      | 90.72 |
| 14 | 78084707  | rs11844960 | A | C | 4 | 0.3041  | 0.3595 | 1.0369 | 1.0713 | 0.0139 | 71.77 |
| 4  | 116508739 | rs7685112  | C | T | 4 | 0.4675  | 0.3598 | 0.9739 | 0.927  | 0.0067 | 75.46 |
| 9  | 10646211  | rs10756079 | C | T | 4 | 0.4098  | 0.3598 | 1.0413 | 1.1244 | 0.0008 | 81.98 |
| 21 | 16557703  | rs2823721  | A | G | 4 | 0.04666 | 0.3599 | 1.0747 | 1.0892 | 0.0012 | 81.1  |
| 5  | 13544938  | rs11952402 | C | T | 4 | 0.02316 | 0.3601 | 1.1548 | 1.1704 | 0.0005 | 83.03 |
| 21 | 40106968  | rs9305680  | C | G | 4 | 0.04922 | 0.3601 | 0.9285 | 0.9404 | 0.0588 | 59.75 |
| 14 | 78085602  | rs2193670  | A | G | 4 | 0.276   | 0.3605 | 1.0395 | 1.0768 | 0.0067 | 75.41 |
| 6  | 30221529  | rs12202131 | A | T | 4 | 0.01626 | 0.3606 | 1.1926 | 1.1446 | 0.0223 | 68.73 |
| 13 | 89121163  | rs1327342  | C | G | 3 | 0.09914 | 0.3606 | 0.7815 | 0.6793 | 0.0015 | 84.58 |
| 4  | 8400638   | rs1678305  | C | T | 4 | 0.4285  | 0.3612 | 1.0296 | 1.0815 | 0.0057 | 76.13 |
| 4  | 92459054  | rs9999729  | C | G | 4 | 0.2904  | 0.3614 | 0.9589 | 0.9117 | 0.0017 | 80.11 |
| 21 | 16557408  | rs238964   | C | G | 4 | 0.04419 | 0.3614 | 0.9303 | 0.9192 | 0.0013 | 80.93 |
| 4  | 116548408 | rs6814621  | A | C | 4 | 0.4794  | 0.3615 | 0.9746 | 0.9261 | 0.0055 | 76.28 |
| 4  | 116554439 | rs7440324  | A | T | 4 | 0.4794  | 0.3615 | 0.9746 | 0.9261 | 0.0055 | 76.28 |
| 4  | 92459103  | rs9999885  | A | G | 4 | 0.29    | 0.3617 | 1.0429 | 1.0971 | 0.0017 | 80.27 |
| 2  | 83407484  | rs7425554  | C | T | 4 | 0.4136  | 0.362  | 0.9714 | 0.9301 | 0.0081 | 74.59 |
| 4  | 116495156 | rs6533856  | G | T | 4 | 0.3839  | 0.3624 | 1.0333 | 1.0762 | 0.0127 | 72.3  |
| 18 | 5569427   | rs1785427  | A | G | 4 | 0.3843  | 0.3624 | 1.0306 | 1.0948 | 0.0002 | 84.64 |
| 21 | 29945121  | rs2832424  | A | C | 4 | 0.2808  | 0.3625 | 0.902  | 0.8361 | 0.0155 | 71.15 |
| 21 | 16557390  | rs6517695  | G | T | 4 | 0.03926 | 0.3626 | 1.0761 | 1.0871 | 0.0012 | 81.04 |
| 21 | 16556577  | rs2823720  | A | C | 4 | 0.04037 | 0.3627 | 0.9297 | 0.9202 | 0.0013 | 80.96 |
| 22 | 33925528  | rs134443   | C | T | 4 | 0.04871 | 0.3627 | 0.9269 | 0.9339 | 0.031  | 66.19 |
| 8  | 14884317  | rs10109779 | A | G | 4 | 0.057   | 0.3628 | 0.9325 | 0.9385 | 0.0353 | 65.06 |
| 14 | 78067940  | rs4243660  | C | T | 4 | 0.2764  | 0.3629 | 1.0394 | 1.0765 | 0.0065 | 75.55 |
| 18 | 5570911   | rs1719933  | C | T | 4 | 0.3884  | 0.3629 | 0.9705 | 0.9136 | 0.0002 | 84.63 |
| 21 | 40073319  | rs7278733  | A | G | 4 | 0.03275 | 0.3629 | 0.9226 | 0.9374 | 0.0397 | 63.97 |
| 6  | 94814379  | rs9363138  | G | T | 4 | 0.01425 | 0.3633 | 1.0903 | 1.0572 | 0.07   | 57.5  |
| 4  | 116542863 | rs11933617 | A | G | 4 | 0.4857  | 0.3635 | 1.0257 | 1.0797 | 0.0053 | 76.41 |
| 4  | 116540440 | rs7687193  | A | G | 4 | 0.4861  | 0.3638 | 0.975  | 0.9264 | 0.0054 | 76.34 |
| 4  | 116548085 | rs11947264 | C | T | 4 | 0.4861  | 0.3638 | 0.975  | 0.9264 | 0.0054 | 76.34 |
| 2  | 83404583  | rs6745924  | C | G | 4 | 0.441   | 0.3646 | 1.0273 | 1.0752 | 0.0067 | 75.44 |
| 2  | 107783958 | rs13414755 | A | C | 3 | 0.01367 | 0.3648 | 0.9044 | 0.9299 | 0.0408 | 68.73 |

|    |           |            |   |   |   |          |        |        |        |        |       |
|----|-----------|------------|---|---|---|----------|--------|--------|--------|--------|-------|
| 14 | 78060216  | rs1030124  | G | T | 4 | 0.2792   | 0.3648 | 0.9623 | 0.9291 | 0.0065 | 75.59 |
| 21 | 29954574  | rs363569   | C | T | 4 | 0.277    | 0.3648 | 0.9011 | 0.8355 | 0.0144 | 71.58 |
| 12 | 119024673 | rs3852587  | A | C | 3 | 0.3818   | 0.3654 | 1.0516 | 1.17   | 0.0027 | 83.1  |
| 18 | 64690810  | rs2051303  | A | T | 4 | 0.01313  | 0.3655 | 1.1005 | 1.0693 | 0.0361 | 64.87 |
| 18 | 64691203  | rs2051301  | C | T | 4 | 0.01313  | 0.3655 | 1.1005 | 1.0693 | 0.0361 | 64.87 |
| 18 | 64693088  | rs2004027  | A | T | 4 | 0.01313  | 0.3655 | 1.1005 | 1.0693 | 0.0361 | 64.87 |
| 4  | 116540808 | rs12233647 | A | G | 4 | 0.4925   | 0.3657 | 1.0253 | 1.0794 | 0.0052 | 76.47 |
| 4  | 116549189 | rs4833478  | A | G | 4 | 0.4925   | 0.3657 | 1.0253 | 1.0794 | 0.0052 | 76.47 |
| 3  | 102098240 | rs2245556  | C | T | 4 | 0.5865   | 0.3658 | 0.9732 | 0.8495 | 0      | 90.69 |
| 8  | 17655354  | rs6586642  | C | T | 4 | 0.01312  | 0.3658 | 0.8887 | 0.9203 | 0.0357 | 64.96 |
| 5  | 13541800  | rs151152   | C | T | 4 | 0.0113   | 0.3659 | 0.8757 | 0.8698 | 0.0001 | 85.86 |
| 18 | 5591403   | rs1785418  | A | G | 4 | 0.3897   | 0.3662 | 0.9703 | 0.9156 | 0.0004 | 83.6  |
| 6  | 51884494  | rs12196767 | C | T | 4 | 0.05242  | 0.3666 | 0.9143 | 0.9168 | 0.0168 | 70.64 |
| 18 | 44764374  | rs8089910  | C | G | 4 | 0.4278   | 0.3669 | 1.0291 | 1.0818 | 0.0034 | 78.05 |
| 21 | 16555965  | rs1492957  | C | T | 4 | 0.0429   | 0.367  | 1.0745 | 1.0859 | 0.0012 | 81.02 |
| 2  | 29149180  | rs13385188 | A | G | 3 | 0.04633  | 0.3672 | 1.0901 | 1.0877 | 0.0234 | 73.36 |
| 14 | 78060082  | rs1030123  | A | G | 4 | 0.2831   | 0.3673 | 1.0388 | 1.0758 | 0.0064 | 75.59 |
| 21 | 16553084  | rs2823705  | A | G | 4 | 0.04974  | 0.3675 | 0.9326 | 0.9231 | 0.002  | 79.75 |
| 7  | 26553081  | rs17153906 | C | T | 4 | 0.9687   | 0.3677 | 0.9983 | 0.8974 | 0.0002 | 84.74 |
| 4  | 116523298 | rs4834470  | C | T | 4 | 0.4922   | 0.3679 | 1.0253 | 1.078  | 0.006  | 75.88 |
| 4  | 92462703  | rs6532292  | C | T | 4 | 0.3074   | 0.3681 | 1.041  | 1.0939 | 0.0019 | 79.94 |
| 5  | 105493632 | rs974073   | G | T | 4 | 0.7616   | 0.3685 | 1.0144 | 1.1222 | 0.0004 | 83.49 |
| 12 | 114337140 | rs11067584 | C | T | 4 | 0.01393  | 0.3686 | 1.1074 | 1.0732 | 0.0355 | 65.01 |
| 2  | 30841879  | rs6548032  | A | G | 4 | 0.003583 | 0.3691 | 1.1157 | 1.0711 | 0.0223 | 68.76 |
| 10 | 30461295  | rs11007912 | C | G | 4 | 0.003634 | 0.3692 | 1.1244 | 1.0686 | 0.0522 | 61.12 |
| 1  | 75106090  | rs12743570 | C | G | 4 | 0.2548   | 0.3693 | 1.0466 | 1.091  | 0.0029 | 78.58 |
| 5  | 114715541 | rs1455845  | A | G | 4 | 0.361    | 0.3693 | 1.0612 | 1.1244 | 0.0157 | 71.05 |
| 8  | 140497072 | rs10104031 | C | T | 4 | 0.5482   | 0.3693 | 1.0253 | 1.0845 | 0.0102 | 73.47 |
| 3  | 102089971 | rs17338506 | C | T | 4 | 0.7621   | 0.3698 | 1.0155 | 1.1335 | 0.0004 | 83.71 |
| 6  | 130362937 | rs945889   | C | T | 4 | 0.3274   | 0.3699 | 0.9375 | 0.8432 | 0.0005 | 82.91 |
| 21 | 16555455  | rs4465860  | C | T | 4 | 0.04462  | 0.3699 | 0.9312 | 0.9212 | 0.0012 | 81.09 |
| 21 | 16555664  | rs2823716  | A | G | 4 | 0.04462  | 0.3699 | 0.9312 | 0.9212 | 0.0012 | 81.09 |
| 4  | 116518282 | rs7663921  | C | T | 4 | 0.4985   | 0.37   | 0.9757 | 0.9278 | 0.0059 | 75.95 |
| 21 | 40129825  | rs741866   | C | T | 4 | 0.05081  | 0.3705 | 0.9289 | 0.9388 | 0.0429 | 63.21 |
| 4  | 92459702  | rs7659326  | A | T | 4 | 0.3497   | 0.3706 | 0.9618 | 0.9073 | 0.0012 | 81.2  |
| 21 | 16555396  | rs2251006  | C | T | 4 | 0.04524  | 0.3706 | 1.0737 | 1.0853 | 0.0012 | 81.06 |
| 4  | 116558804 | rs6847471  | A | G | 4 | 0.5062   | 0.3708 | 1.0245 | 1.0786 | 0.0051 | 76.55 |

|    |           |            |   |   |   |          |        |        |        |        |       |
|----|-----------|------------|---|---|---|----------|--------|--------|--------|--------|-------|
| 18 | 64676889  | rs9948116  | A | G | 4 | 0.01771  | 0.3708 | 0.9125 | 0.9372 | 0.0423 | 63.35 |
| 9  | 10647559  | rs10756080 | C | T | 4 | 0.4409   | 0.3709 | 1.0386 | 1.1232 | 0.0007 | 82.5  |
| 2  | 105447178 | rs6711988  | C | T | 4 | 0.05667  | 0.371  | 1.1415 | 1.1465 | 0.0099 | 73.63 |
| 5  | 105642920 | rs10068181 | A | G | 4 | 0.6174   | 0.3711 | 1.0238 | 1.1159 | 0.0009 | 81.76 |
| 21 | 16554963  | rs2823712  | A | G | 4 | 0.04632  | 0.3712 | 1.0733 | 1.085  | 0.0013 | 80.97 |
| 6  | 130363872 | rs2876066  | A | C | 4 | 0.3485   | 0.3716 | 0.9403 | 0.8435 | 0.0005 | 82.99 |
| 15 | 52109020  | rs12917513 | A | T | 4 | 0.4267   | 0.3721 | 0.9629 | 0.8981 | 0.0018 | 79.98 |
| 4  | 92463052  | rs6532293  | A | G | 4 | 0.321    | 0.3726 | 1.0395 | 1.0925 | 0.0018 | 79.97 |
| 22 | 33929534  | rs5999761  | C | G | 4 | 0.05311  | 0.3726 | 1.0773 | 1.0694 | 0.0304 | 66.35 |
| 4  | 116559642 | rs6854632  | A | G | 4 | 0.5135   | 0.3728 | 0.9765 | 0.9273 | 0.0051 | 76.59 |
| 2  | 113527418 | rs9678578  | A | T | 4 | 0.01966  | 0.3731 | 0.9154 | 0.9352 | 0.0267 | 67.42 |
| 1  | 75112763  | rs7552148  | C | T | 4 | 0.2608   | 0.3732 | 0.956  | 0.9171 | 0.0028 | 78.73 |
| 16 | 7338453   | rs9934586  | A | G | 4 | 0.01848  | 0.3733 | 0.8704 | 0.912  | 0.0673 | 58.04 |
| 21 | 40071834  | rs2205205  | A | G | 4 | 0.03375  | 0.3735 | 1.0834 | 1.0661 | 0.0364 | 64.79 |
| 20 | 19711787  | rs17370440 | A | T | 4 | 0.3131   | 0.3736 | 1.0621 | 1.136  | 0.0026 | 78.94 |
| 6  | 51868413  | rs12206267 | C | T | 4 | 0.05838  | 0.3741 | 1.0929 | 1.0872 | 0.0248 | 67.97 |
| 18 | 5584739   | rs1785409  | C | T | 4 | 0.37     | 0.3741 | 0.9694 | 0.9163 | 0.0003 | 84.26 |
| 21 | 16553507  | rs1389073  | G | T | 4 | 0.05162  | 0.3744 | 0.9332 | 0.9229 | 0.0015 | 80.58 |
| 4  | 92466196  | rs1528578  | C | G | 4 | 0.3195   | 0.3745 | 1.0396 | 1.0898 | 0.0026 | 78.9  |
| 4  | 92462591  | rs1919227  | G | T | 4 | 0.3275   | 0.3746 | 1.0393 | 1.0928 | 0.0018 | 80.04 |
| 6  | 83346508  | rs9443987  | C | T | 3 | 0.1804   | 0.3751 | 1.1927 | 1.3589 | 0.004  | 81.88 |
| 15 | 89951919  | rs7495265  | C | T | 4 | 0.1974   | 0.3751 | 0.9484 | 0.9085 | 0.0009 | 81.79 |
| 3  | 102218829 | rs17399603 | A | G | 4 | 0.6454   | 0.3752 | 0.9777 | 0.8589 | 0      | 89.97 |
| 10 | 129849048 | rs6482660  | A | G | 4 | 0.3217   | 0.3753 | 1.0384 | 1.0962 | 0.0004 | 83.3  |
| 6  | 83349658  | rs6939695  | C | A | 3 | 0.1966   | 0.3754 | 1.1831 | 1.3566 | 0.0041 | 81.81 |
| 21 | 16549874  | rs239009   | A | G | 4 | 0.05571  | 0.3756 | 1.0716 | 1.0856 | 0.0013 | 80.93 |
| 21 | 16551609  | rs2823702  | A | G | 4 | 0.05198  | 0.3757 | 0.9333 | 0.9242 | 0.0019 | 79.93 |
| 6  | 55494436  | rs9357865  | A | G | 4 | 0.9375   | 0.376  | 1.0042 | 0.8874 | 0.0013 | 80.83 |
| 2  | 83410251  | rs6760584  | G | T | 4 | 0.4328   | 0.3762 | 1.0285 | 1.0699 | 0.0134 | 71.99 |
| 21 | 16555717  | rs2823717  | A | T | 4 | 0.04731  | 0.3763 | 0.932  | 0.9217 | 0.0011 | 81.35 |
| 1  | 95591184  | rs11590181 | G | T | 4 | 0.1787   | 0.3764 | 1.075  | 1.1163 | 0.005  | 76.61 |
| 18 | 5577607   | rs1719937  | A | G | 4 | 0.507    | 0.3764 | 1.0242 | 1.0925 | 0.0004 | 83.44 |
| 7  | 97308426  | rs6465629  | C | T | 4 | 0.5366   | 0.3765 | 0.9697 | 0.8983 | 0.0022 | 79.44 |
| 10 | 30470812  | rs10508745 | C | T | 4 | 0.004977 | 0.3766 | 1.1198 | 1.0666 | 0.0554 | 60.44 |
| 21 | 16553692  | rs4381854  | C | T | 4 | 0.05132  | 0.3768 | 0.9331 | 0.9227 | 0.0013 | 80.85 |
| 18 | 5584350   | rs1785407  | A | G | 4 | 0.3767   | 0.3771 | 1.0311 | 1.0913 | 0.0002 | 84.45 |
| 18 | 5584648   | rs1785408  | A | G | 4 | 0.3767   | 0.3771 | 1.0311 | 1.0913 | 0.0002 | 84.45 |

|    |           |            |   |   |   |          |        |        |        |        |       |
|----|-----------|------------|---|---|---|----------|--------|--------|--------|--------|-------|
| 18 | 5584667   | rs1719943  | C | T | 4 | 0.3767   | 0.3771 | 1.0311 | 1.0913 | 0.0002 | 84.45 |
| 3  | 44998914  | rs6441875  | C | T | 4 | 0.366    | 0.3774 | 1.0317 | 1.0714 | 0.0084 | 74.43 |
| 3  | 45005286  | rs4683016  | A | G | 4 | 0.3686   | 0.3774 | 0.9695 | 0.9332 | 0.0082 | 74.54 |
| 20 | 19731315  | rs17370886 | G | T | 4 | 0.3026   | 0.3774 | 0.9405 | 0.8832 | 0.0032 | 78.23 |
| 10 | 30470483  | rs7896890  | C | T | 4 | 0.004957 | 0.3775 | 0.893  | 0.9376 | 0.0553 | 60.47 |
| 21 | 16554814  | rs238962   | C | T | 4 | 0.08243  | 0.3775 | 0.9385 | 0.9235 | 0.0024 | 79.18 |
| 11 | 80661677  | rs17141854 | A | G | 4 | 0.243    | 0.3778 | 0.9047 | 0.8479 | 0.0106 | 73.25 |
| 21 | 16553672  | rs1389071  | A | T | 4 | 0.05267  | 0.3779 | 1.0712 | 1.0833 | 0.0014 | 80.76 |
| 6  | 130357104 | rs1415699  | A | G | 4 | 0.3443   | 0.3783 | 0.9405 | 0.845  | 0.0004 | 83.46 |
| 3  | 45011179  | rs9835136  | A | G | 4 | 0.3714   | 0.3784 | 1.0313 | 1.0715 | 0.0081 | 74.6  |
| 22 | 33926150  | rs134445   | C | T | 4 | 0.05342  | 0.3784 | 0.9283 | 0.9351 | 0.0278 | 67.1  |
| 15 | 84618315  | rs1159895  | A | G | 4 | 0.01073  | 0.3785 | 1.103  | 1.0613 | 0.0639 | 58.71 |
| 8  | 6812946   | rs4543566  | C | G | 4 | 0.02429  | 0.3789 | 1.1288 | 1.0847 | 0.0671 | 58.07 |
| 21 | 16554235  | rs2823709  | A | G | 4 | 0.05264  | 0.3791 | 1.0712 | 1.0836 | 0.0013 | 80.96 |
| 2  | 70819307  | rs11126291 | G | T | 4 | 0.08318  | 0.3798 | 0.8722 | 0.8459 | 0.0047 | 76.89 |
| 5  | 105638139 | rs10063657 | C | T | 4 | 0.738    | 0.3798 | 1.0154 | 1.1183 | 0.0003 | 84.17 |
| 21 | 16555037  | rs2823713  | A | T | 4 | 0.05033  | 0.38   | 1.072  | 1.0843 | 0.0011 | 81.37 |
| 4  | 21227279  | rs6848248  | A | G | 4 | 0.005428 | 0.3811 | 0.9073 | 0.9349 | 0.0102 | 73.47 |
| 18 | 5577094   | rs1785378  | A | G | 4 | 0.4601   | 0.3818 | 0.9738 | 0.9161 | 0.0004 | 83.72 |
| 7  | 157015643 | rs221238   | C | T | 4 | 0.04006  | 0.3821 | 0.8904 | 0.8947 | 0.0085 | 74.34 |
| 11 | 131494847 | rs3925045  | C | G | 4 | 0.4078   | 0.3821 | 1.0387 | 1.1062 | 0.0026 | 78.94 |
| 11 | 80661868  | rs10897779 | G | T | 4 | 0.3454   | 0.3825 | 1.0397 | 1.0871 | 0.0068 | 75.38 |
| 21 | 16554494  | rs2823710  | A | G | 4 | 0.0525   | 0.3825 | 0.9335 | 0.9229 | 0.0011 | 81.23 |
| 21 | 40081847  | rs2837218  | C | G | 4 | 0.05128  | 0.3825 | 1.0762 | 1.0626 | 0.0458 | 62.54 |
| 4  | 89068576  | rs17842205 | A | C | 4 | 0.2519   | 0.3828 | 1.0756 | 1.142  | 0.0036 | 77.83 |
| 8  | 14879068  | rs9650382  | A | G | 4 | 0.04802  | 0.3828 | 1.0758 | 1.0607 | 0.046  | 62.51 |
| 21 | 16553023  | rs2823704  | C | T | 4 | 0.05494  | 0.3829 | 1.0706 | 1.0821 | 0.0015 | 80.52 |
| 2  | 17222881  | rs484687   | C | T | 4 | 0.4947   | 0.3831 | 1.0351 | 1.1027 | 0.0113 | 72.91 |
| 4  | 116552171 | rs6836582  | A | G | 4 | 0.5133   | 0.3831 | 1.0241 | 1.0765 | 0.0052 | 76.46 |
| 6  | 83342419  | rs6904410  | C | T | 3 | 0.2069   | 0.3831 | 1.1777 | 1.3556 | 0.0034 | 82.41 |
| 21 | 16551998  | rs239010   | A | G | 4 | 0.05474  | 0.3832 | 1.0706 | 1.0813 | 0.0017 | 80.25 |
| 16 | 47680675  | rs1345408  | C | G | 4 | 0.02401  | 0.3835 | 0.9236 | 0.9406 | 0.0254 | 67.77 |
| 16 | 74938492  | rs17698989 | A | G | 4 | 0.5793   | 0.3835 | 1.026  | 1.1017 | 0.003  | 78.45 |
| 14 | 78030008  | rs1544623  | A | G | 4 | 0.326    | 0.3836 | 0.966  | 0.9351 | 0.0106 | 73.24 |
| 21 | 16558862  | rs2823725  | A | T | 4 | 0.06447  | 0.384  | 1.0727 | 1.0859 | 0.0018 | 80    |
| 3  | 29736510  | rs1371844  | C | T | 4 | 0.4312   | 0.3843 | 0.971  | 0.9318 | 0.0108 | 73.17 |
| 2  | 38439578  | rs6716350  | C | T | 4 | 0.4079   | 0.3844 | 1.0329 | 1.109  | 0.0001 | 86.21 |

|    |           |            |   |   |   |          |        |        |        |        |       |
|----|-----------|------------|---|---|---|----------|--------|--------|--------|--------|-------|
| 2  | 51647831  | rs1406429  | C | T | 4 | 0.03556  | 0.3846 | 0.9292 | 0.9444 | 0.0394 | 64.06 |
| 4  | 116456988 | rs17686110 | A | C | 4 | 0.3836   | 0.3848 | 1.0331 | 1.0748 | 0.0088 | 74.21 |
| 21 | 40085103  | rs2837223  | C | T | 4 | 0.04882  | 0.3848 | 1.0772 | 1.0625 | 0.0455 | 62.61 |
| 18 | 5582779   | rs1719939  | C | T | 4 | 0.3979   | 0.3854 | 0.9711 | 0.9171 | 0.0002 | 84.68 |
| 21 | 16550664  | rs2823700  | C | G | 4 | 0.05727  | 0.3855 | 1.0698 | 1.0809 | 0.0016 | 80.27 |
| 3  | 45009415  | rs4683017  | C | T | 4 | 0.3947   | 0.3859 | 0.9711 | 0.9345 | 0.0084 | 74.43 |
| 3  | 29738242  | rs6783723  | A | G | 4 | 0.4344   | 0.3863 | 1.0296 | 1.0727 | 0.0109 | 73.11 |
| 4  | 92527407  | rs7668527  | A | T | 4 | 0.486    | 0.3864 | 1.0274 | 1.0826 | 0.0051 | 76.57 |
| 10 | 30463891  | rs11007913 | A | G | 4 | 0.004028 | 0.3865 | 1.1228 | 1.0664 | 0.0493 | 61.77 |
| 18 | 5579721   | rs1785381  | C | T | 4 | 0.4758   | 0.3871 | 1.0263 | 1.091  | 0.0004 | 83.4  |
| 2  | 113532952 | rs990524   | C | T | 4 | 0.02254  | 0.3872 | 1.0902 | 1.068  | 0.0241 | 68.19 |
| 2  | 105446439 | rs13385109 | A | T | 4 | 0.06265  | 0.3877 | 0.8778 | 0.8732 | 0.0079 | 74.69 |
| 5  | 30094872  | rs11743490 | A | G | 4 | 0.02077  | 0.3878 | 0.8675 | 0.9118 | 0.0655 | 58.38 |
| 6  | 30201343  | rs10947055 | C | T | 4 | 0.02305  | 0.3881 | 1.1767 | 1.1393 | 0.0152 | 71.24 |
| 21 | 16549688  | rs2823696  | A | T | 4 | 0.05844  | 0.3882 | 1.0696 | 1.082  | 0.0013 | 80.85 |
| 21 | 16550560  | rs2823699  | C | T | 4 | 0.05984  | 0.3882 | 0.9354 | 0.9255 | 0.0016 | 80.31 |
| 21 | 17225906  | rs7282020  | A | C | 4 | 0.006503 | 0.3883 | 1.1145 | 1.0652 | 0.0496 | 61.69 |
| 9  | 119032843 | rs1335405  | C | T | 4 | 0.01042  | 0.3884 | 0.8211 | 0.8797 | 0.038  | 64.39 |
| 21 | 16552797  | rs2823703  | C | G | 4 | 0.05723  | 0.3884 | 0.9347 | 0.9254 | 0.0016 | 80.37 |
| 3  | 29737133  | rs6780134  | A | G | 4 | 0.4407   | 0.3886 | 1.0292 | 1.0724 | 0.0108 | 73.16 |
| 3  | 29736653  | rs1371846  | A | C | 4 | 0.4439   | 0.3889 | 0.9718 | 0.9324 | 0.0106 | 73.27 |
| 2  | 51632332  | rs2715088  | C | T | 4 | 0.02478  | 0.389  | 1.0815 | 1.0609 | 0.0279 | 67.05 |
| 1  | 199359602 | rs942703   | C | T | 4 | 0.2653   | 0.3893 | 0.9553 | 0.9205 | 0.0048 | 76.77 |
| 7  | 97309563  | rs13223125 | A | T | 4 | 0.5874   | 0.3895 | 0.9734 | 0.9003 | 0.002  | 79.71 |
| 8  | 60881049  | rs10101487 | A | G | 4 | 0.5974   | 0.3895 | 0.98   | 0.9275 | 0.0068 | 75.37 |
| 21 | 16550037  | rs2823697  | C | T | 4 | 0.05909  | 0.3898 | 1.0694 | 1.0816 | 0.0013 | 80.88 |
| 4  | 21227268  | rs6824942  | C | T | 4 | 0.005719 | 0.3899 | 0.908  | 0.9358 | 0.0094 | 73.87 |
| 2  | 30844445  | rs7592480  | A | G | 4 | 0.003978 | 0.3902 | 1.1133 | 1.0663 | 0.0248 | 67.96 |
| 18 | 5586091   | rs1539812  | C | T | 4 | 0.4149   | 0.3906 | 0.9721 | 0.9176 | 0.0002 | 84.82 |
| 18 | 5586603   | rs1719944  | C | T | 4 | 0.4149   | 0.3906 | 0.9721 | 0.9176 | 0.0002 | 84.82 |
| 4  | 92461122  | rs1528581  | C | T | 4 | 0.3549   | 0.3908 | 1.0374 | 1.0897 | 0.002  | 79.74 |
| 2  | 70823291  | rs3755352  | A | T | 4 | 0.08748  | 0.3909 | 1.1449 | 1.1801 | 0.0041 | 77.4  |
| 21 | 40083524  | rs760285   | A | G | 4 | 0.04935  | 0.391  | 0.9285 | 0.9415 | 0.0433 | 63.13 |
| 7  | 157017352 | rs221242   | A | C | 4 | 0.04297  | 0.3915 | 0.8919 | 0.8969 | 0.0088 | 74.16 |
| 18 | 5584917   | rs1785410  | C | T | 4 | 0.4162   | 0.3915 | 1.0286 | 1.0899 | 0.0002 | 84.94 |
| 5  | 105650703 | rs13185392 | C | T | 4 | 0.653    | 0.3916 | 1.0214 | 1.1108 | 0.001  | 81.64 |
| 21 | 16550380  | rs9808741  | G | T | 4 | 0.06359  | 0.3917 | 1.0681 | 1.0806 | 0.0014 | 80.63 |

|    |           |            |   |   |   |          |        |        |        |        |       |
|----|-----------|------------|---|---|---|----------|--------|--------|--------|--------|-------|
| 6  | 52615564  | rs9463810  | T | G | 3 | 0.042    | 0.3919 | 1.3047 | 1.3099 | 0.0104 | 78.09 |
| 18 | 5580926   | rs1785382  | C | T | 4 | 0.4079   | 0.3919 | 1.0292 | 1.0868 | 0.0004 | 83.74 |
| 11 | 131483057 | rs11605616 | C | G | 2 | 0.002447 | 0.3923 | 0.3069 | 0.4345 | 0.0245 | 80.22 |
| 4  | 21227551  | rs13117892 | A | T | 4 | 0.00593  | 0.3936 | 0.9083 | 0.9361 | 0.0092 | 73.98 |
| 4  | 92472949  | rs1406316  | C | T | 4 | 0.3945   | 0.3939 | 0.9673 | 0.9206 | 0.0026 | 78.99 |
| 4  | 116441466 | rs10434023 | C | T | 4 | 0.405    | 0.3939 | 1.0316 | 1.0731 | 0.009  | 74.07 |
| 4  | 116472360 | rs7655124  | C | T | 4 | 0.4088   | 0.3939 | 1.0313 | 1.0743 | 0.0076 | 74.87 |
| 7  | 97313206  | rs17131831 | A | G | 4 | 0.6003   | 0.3941 | 0.9743 | 0.901  | 0.002  | 79.77 |
| 3  | 29753247  | rs1866773  | C | T | 4 | 0.3816   | 0.3943 | 1.0315 | 1.0688 | 0.009  | 74.06 |
| 15 | 86281541  | rs1435399  | A | T | 4 | 0.01064  | 0.3944 | 0.8878 | 0.9281 | 0.0373 | 64.55 |
| 16 | 50054960  | rs13338826 | C | G | 4 | 0.1374   | 0.3945 | 0.9377 | 0.9205 | 0.0077 | 74.8  |
| 21 | 40114073  | rs1984023  | A | G | 4 | 0.05661  | 0.3946 | 1.0746 | 1.0609 | 0.0467 | 62.34 |
| 4  | 92471115  | rs6833290  | C | T | 4 | 0.4025   | 0.3948 | 1.0332 | 1.086  | 0.0026 | 78.96 |
| 15 | 89900920  | rs11637543 | C | T | 4 | 0.2726   | 0.3948 | 0.9564 | 0.9131 | 0.0008 | 81.98 |
| 7  | 157023027 | rs221250   | A | G | 4 | 0.04365  | 0.395  | 1.1208 | 1.1145 | 0.0084 | 74.39 |
| 17 | 51880345  | rs7224952  | C | T | 4 | 0.005472 | 0.395  | 0.8983 | 0.9352 | 0.0227 | 68.61 |
| 2  | 30858582  | rs2030383  | G | T | 4 | 0.001234 | 0.3958 | 0.8849 | 0.9339 | 0.0143 | 71.63 |
| 2  | 55796721  | rs12474717 | G | T | 4 | 0.007739 | 0.3961 | 0.8431 | 0.883  | 0.0061 | 75.8  |
| 4  | 116485614 | rs6828907  | C | G | 4 | 0.4087   | 0.3961 | 0.9694 | 0.9304 | 0.0071 | 75.17 |
| 18 | 5579629   | rs1785380  | A | C | 4 | 0.5253   | 0.3961 | 1.0232 | 1.0882 | 0.0004 | 83.4  |
| 2  | 51629015  | rs1528814  | C | T | 4 | 0.02574  | 0.3962 | 1.0816 | 1.0595 | 0.0318 | 65.99 |
| 2  | 30843832  | rs13003439 | G | T | 4 | 0.004369 | 0.3963 | 1.112  | 1.0654 | 0.0247 | 68    |
| 2  | 51641486  | rs2698022  | A | C | 4 | 0.03105  | 0.3968 | 1.0782 | 1.0599 | 0.0288 | 66.81 |
| 4  | 92459301  | rs7653977  | A | T | 4 | 0.3215   | 0.3969 | 0.9617 | 0.9165 | 0.0013 | 80.96 |
| 22 | 33897413  | rs134370   | C | G | 4 | 0.05943  | 0.397  | 1.0753 | 1.0692 | 0.0204 | 69.37 |
| 4  | 21227772  | rs10000010 | C | T | 4 | 0.006148 | 0.3972 | 0.9087 | 0.9365 | 0.009  | 74.08 |
| 4  | 58782188  | rs2570073  | A | C | 4 | 0.01138  | 0.3975 | 1.1032 | 1.0692 | 0.0211 | 69.12 |
| 2  | 30858583  | rs2030384  | G | T | 4 | 0.001245 | 0.3977 | 0.885  | 0.9342 | 0.0142 | 71.67 |
| 5  | 105650965 | rs13185419 | A | C | 4 | 0.6784   | 0.3979 | 0.9806 | 0.9011 | 0.0009 | 81.8  |
| 21 | 40101083  | rs2837232  | A | G | 4 | 0.04679  | 0.398  | 1.0779 | 1.0621 | 0.0392 | 64.1  |
| 4  | 116438169 | rs6853566  | C | T | 4 | 0.4172   | 0.3983 | 0.9701 | 0.9323 | 0.0087 | 74.22 |
| 8  | 17542512  | rs6981782  | C | T | 2 | 0.0116   | 0.3983 | 2.0451 | 1.8516 | 0.0111 | 84.5  |
| 3  | 151370478 | rs16862540 | C | G | 4 | 0.6685   | 0.3988 | 1.0192 | 1.0892 | 0.0078 | 74.75 |
| 8  | 12893231  | rs1519150  | A | T | 4 | 0.001942 | 0.3988 | 0.8831 | 0.936  | 0.0281 | 67    |
| 2  | 38431205  | rs6737169  | C | T | 4 | 0.4515   | 0.3989 | 0.971  | 0.9032 | 0.0001 | 86.56 |
| 12 | 119031310 | rs3936255  | T | G | 3 | 0.4106   | 0.3989 | 1.0485 | 1.1586 | 0.0027 | 83.07 |
| 12 | 128846223 | rs1376795  | C | T | 4 | 0.04818  | 0.3989 | 1.0784 | 1.0657 | 0.0288 | 66.81 |

|    |           |            |   |   |   |         |        |        |        |        |       |
|----|-----------|------------|---|---|---|---------|--------|--------|--------|--------|-------|
| 5  | 105608827 | rs6878200  | C | T | 4 | 0.7587  | 0.3992 | 0.9868 | 0.9148 | 0.0026 | 78.91 |
| 12 | 118998008 | rs3852585  | T | C | 3 | 0.4667  | 0.3992 | 1.0428 | 1.1589 | 0.0024 | 83.46 |
| 21 | 17222789  | rs17210470 | C | T | 4 | 0.01289 | 0.3995 | 1.1066 | 1.0624 | 0.0629 | 58.9  |
| 3  | 151376909 | rs1386291  | C | T | 4 | 0.6559  | 0.3998 | 1.02   | 1.0888 | 0.0078 | 74.74 |
| 1  | 48896205  | rs7556329  | C | G | 4 | 0.3259  | 0.4001 | 1.0776 | 1.1563 | 0.0055 | 76.28 |
| 2  | 17296529  | rs6712339  | C | T | 4 | 0.7084  | 0.4004 | 1.0183 | 1.0947 | 0.0111 | 73.02 |
| 12 | 17575942  | rs11043491 | G | T | 4 | 0.4006  | 0.4005 | 0.9627 | 0.9119 | 0.0038 | 77.67 |
| 12 | 128845279 | rs1031400  | A | G | 4 | 0.04867 | 0.4005 | 0.9274 | 0.9383 | 0.0277 | 67.11 |
| 9  | 4855256   | rs12554461 | A | G | 4 | 0.8339  | 0.4009 | 0.9922 | 0.9316 | 0.0088 | 74.2  |
| 18 | 5588976   | rs1785415  | A | G | 4 | 0.4444  | 0.4009 | 0.9738 | 0.9185 | 0.0002 | 85.16 |
| 11 | 131489477 | rs12223742 | C | T | 4 | 0.4171  | 0.401  | 0.9635 | 0.9078 | 0.0026 | 78.96 |
| 21 | 40083878  | rs11701338 | C | T | 4 | 0.05186 | 0.4012 | 0.9293 | 0.9423 | 0.0407 | 63.73 |
| 18 | 5586929   | rs1785413  | A | G | 4 | 0.4477  | 0.4013 | 1.0267 | 1.0886 | 0.0002 | 85.15 |
| 2  | 51644884  | rs1919433  | C | G | 4 | 0.03563 | 0.4017 | 1.0767 | 1.0581 | 0.0347 | 65.23 |
| 1  | 108005170 | rs17479604 | A | C | 4 | 0.09217 | 0.402  | 1.0898 | 1.1067 | 0.0046 | 76.96 |
| 4  | 116498891 | rs12651062 | A | G | 4 | 0.4256  | 0.402  | 1.0304 | 1.0743 | 0.0066 | 75.47 |
| 16 | 7375184   | rs7202219  | A | T | 4 | 0.00784 | 0.402  | 0.8517 | 0.91   | 0.0458 | 62.55 |
| 22 | 33870522  | rs5750066  | G | T | 4 | 0.03148 | 0.402  | 1.0909 | 1.0852 | 0.0034 | 78.04 |
| 14 | 94397359  | rs7157782  | C | T | 4 | 0.05314 | 0.4024 | 0.861  | 0.8622 | 0.0074 | 74.99 |
| 18 | 5587676   | rs1785414  | G | T | 4 | 0.4666  | 0.4024 | 0.9748 | 0.9176 | 0.0001 | 85.36 |
| 22 | 33899690  | rs134378   | G | T | 4 | 0.06248 | 0.4028 | 1.0744 | 1.0689 | 0.019  | 69.85 |
| 1  | 75084050  | rs12747472 | C | T | 4 | 0.3054  | 0.4029 | 1.0424 | 1.0848 | 0.0032 | 78.23 |
| 6  | 30227869  | rs9468692  | G | T | 4 | 0.02192 | 0.4029 | 0.8457 | 0.8841 | 0.0231 | 68.51 |
| 10 | 110674541 | rs3934875  | A | G | 4 | 0.01789 | 0.4034 | 1.1136 | 1.0702 | 0.0558 | 60.38 |
| 18 | 5586822   | rs1719983  | C | T | 4 | 0.4537  | 0.4034 | 1.0263 | 1.0884 | 0.0001 | 85.22 |
| 4  | 92477494  | rs1528564  | C | T | 4 | 0.3559  | 0.4037 | 0.9645 | 0.9251 | 0.0042 | 77.33 |
| 12 | 10711189  | rs10743918 | A | C | 4 | 0.01125 | 0.4038 | 1.096  | 1.0551 | 0.0578 | 59.96 |
| 10 | 110505088 | rs17769395 | C | T | 4 | 0.03553 | 0.4039 | 1.1022 | 1.0694 | 0.0652 | 58.46 |
| 5  | 13551578  | rs6874889  | A | G | 4 | 0.0369  | 0.4042 | 1.1401 | 1.1596 | 0.0002 | 84.39 |
| 2  | 51644950  | rs1919432  | C | T | 4 | 0.03365 | 0.4046 | 0.928  | 0.9443 | 0.0298 | 66.53 |
| 13 | 84181912  | rs7319590  | C | T | 4 | 0.5195  | 0.4054 | 1.0365 | 1.1175 | 0.0021 | 79.62 |
| 18 | 5588554   | rs1719985  | C | T | 4 | 0.4678  | 0.4054 | 1.0255 | 1.0859 | 0.0002 | 84.52 |
| 3  | 151371682 | rs1486796  | C | T | 4 | 0.6931  | 0.4055 | 0.9826 | 0.9189 | 0.0075 | 74.93 |
| 18 | 44767911  | rs12962825 | A | G | 4 | 0.494   | 0.4066 | 0.975  | 0.9286 | 0.0032 | 78.23 |
| 2  | 51635788  | rs2715077  | A | C | 4 | 0.02855 | 0.4067 | 1.0801 | 1.0599 | 0.0254 | 67.79 |
| 10 | 30332603  | rs11007851 | C | T | 4 | 0.05099 | 0.4067 | 0.9328 | 0.9457 | 0.0394 | 64.05 |
| 21 | 29943925  | rs363586   | G | T | 4 | 0.3528  | 0.4069 | 1.0936 | 1.1783 | 0.0154 | 71.18 |



|    |           |            |   |   |   |         |        |        |        |        |       |
|----|-----------|------------|---|---|---|---------|--------|--------|--------|--------|-------|
| 14 | 32680251  | rs6571583  | C | T | 4 | 0.05364 | 0.4073 | 1.0782 | 1.0629 | 0.0393 | 64.08 |
| 16 | 45361965  | rs11247495 | C | T | 4 | 0.656   | 0.408  | 0.9767 | 0.8981 | 0.0019 | 79.85 |
| 7  | 97314777  | rs6966699  | C | T | 4 | 0.6558  | 0.4089 | 0.9781 | 0.9033 | 0.0018 | 80.08 |
| 9  | 10622596  | rs2890924  | G | T | 4 | 0.588   | 0.4089 | 0.9735 | 0.9021 | 0.0014 | 80.79 |
| 12 | 118973019 | rs5028648  | G | A | 3 | 0.4344  | 0.4094 | 1.0466 | 1.1547 | 0.0027 | 83.04 |
| 16 | 7371378   | rs8057663  | A | G | 4 | 0.01152 | 0.41   | 0.8585 | 0.9128 | 0.0513 | 61.32 |
| 14 | 94397102  | rs7157079  | A | G | 4 | 0.06065 | 0.4101 | 0.8676 | 0.8657 | 0.0069 | 75.28 |
| 22 | 33890448  | rs134318   | C | T | 4 | 0.06398 | 0.4103 | 1.074  | 1.0679 | 0.0186 | 70    |
| 2  | 219002502 | rs6720403  | A | C | 4 | 0.3509  | 0.4104 | 1.0342 | 1.0691 | 0.009  | 74.09 |
| 2  | 219003493 | rs3821031  | C | T | 4 | 0.3509  | 0.4104 | 1.0342 | 1.0691 | 0.009  | 74.09 |
| 21 | 40094036  | rs2837227  | C | T | 4 | 0.05022 | 0.4105 | 0.9288 | 0.9434 | 0.0412 | 63.62 |
| 7  | 157012904 | rs6944484  | A | C | 4 | 0.05095 | 0.4109 | 1.1173 | 1.1131 | 0.0068 | 75.35 |
| 1  | 48894788  | rs6674328  | C | T | 4 | 0.3474  | 0.411  | 0.9309 | 0.8655 | 0.0044 | 77.09 |
| 4  | 92459340  | rs7683541  | C | T | 4 | 0.4201  | 0.4111 | 1.0325 | 1.0809 | 0.0043 | 77.23 |
| 17 | 68393833  | rs4969122  | A | C | 4 | 0.01896 | 0.4111 | 0.9205 | 0.9499 | 0.062  | 59.08 |
| 17 | 68393953  | rs4969123  | A | G | 4 | 0.01896 | 0.4111 | 0.9205 | 0.9499 | 0.062  | 59.08 |
| 6  | 117190939 | rs603540   | C | T | 4 | 0.05399 | 0.4113 | 1.0748 | 1.0695 | 0.0143 | 71.62 |
| 2  | 51633763  | rs2698029  | G | T | 4 | 0.02185 | 0.4114 | 0.9225 | 0.9434 | 0.0229 | 68.55 |
| 7  | 152454977 | rs1107875  | A | G | 4 | 0.1623  | 0.4117 | 1.0536 | 1.0768 | 0.0036 | 77.85 |
| 11 | 18858429  | rs4757732  | C | T | 4 | 0.0247  | 0.4122 | 0.8812 | 0.9125 | 0.0269 | 67.33 |
| 9  | 10614748  | rs2146089  | A | G | 4 | 0.5481  | 0.4124 | 0.9708 | 0.9079 | 0.003  | 78.5  |
| 21 | 40095584  | rs2837229  | C | T | 4 | 0.04883 | 0.4124 | 0.9284 | 0.9433 | 0.0395 | 64.04 |
| 9  | 10616033  | rs7030993  | A | G | 4 | 0.5557  | 0.413  | 1.0294 | 1.1012 | 0.0029 | 78.63 |
| 14 | 94396959  | rs7156858  | A | C | 4 | 0.06379 | 0.4132 | 0.8686 | 0.8664 | 0.0071 | 75.17 |
| 7  | 152455222 | rs1107874  | A | T | 4 | 0.1663  | 0.4138 | 0.9493 | 0.9284 | 0.0035 | 77.96 |
| 22 | 33928993  | rs713969   | A | C | 4 | 0.06868 | 0.4139 | 0.9323 | 0.9386 | 0.0236 | 68.33 |
| 12 | 97075690  | rs10860299 | A | G | 4 | 0.8371  | 0.414  | 1.0077 | 0.9269 | 0.0025 | 79.03 |
| 17 | 68392507  | rs4494615  | C | T | 4 | 0.02068 | 0.4141 | 0.9216 | 0.9504 | 0.0638 | 58.74 |
| 22 | 33909346  | rs134406   | C | T | 4 | 0.06423 | 0.4143 | 0.9312 | 0.9373 | 0.0196 | 69.65 |
| 4  | 72311240  | rs7655668  | C | G | 4 | 0.1557  | 0.4144 | 0.9272 | 0.8795 | 0.0001 | 85.63 |
| 6  | 83348993  | rs1999412  | C | A | 3 | 0.2742  | 0.4147 | 1.1516 | 1.3396 | 0.0024 | 83.4  |
| 2  | 51640024  | rs2698024  | A | G | 4 | 0.03704 | 0.4149 | 1.0755 | 1.0571 | 0.03   | 66.48 |
| 7  | 97316047  | rs10486009 | C | G | 4 | 0.6857  | 0.415  | 0.9799 | 0.9036 | 0.0017 | 80.21 |
| 3  | 24755270  | rs4075988  | A | G | 4 | 0.02447 | 0.4151 | 1.118  | 1.0823 | 0.0279 | 67.06 |
| 4  | 40505735  | rs882733   | A | G | 4 | 0.742   | 0.4151 | 0.9841 | 0.9073 | 0.0033 | 78.18 |
| 2  | 51646842  | rs1528812  | C | G | 4 | 0.0383  | 0.4152 | 1.0751 | 1.0576 | 0.0286 | 66.86 |
| 2  | 38424759  | rs10198323 | C | T | 4 | 0.5298  | 0.4155 | 0.9757 | 0.9066 | 0.0001 | 86.51 |

|    |           |            |   |   |   |          |        |        |        |        |       |
|----|-----------|------------|---|---|---|----------|--------|--------|--------|--------|-------|
| 3  | 117034860 | rs2944404  | A | G | 4 | 0.01331  | 0.4155 | 1.1856 | 1.1068 | 0.0552 | 60.5  |
| 4  | 72302238  | rs7689609  | C | T | 4 | 0.1174   | 0.4156 | 1.0834 | 1.126  | 0.0002 | 84.61 |
| 4  | 13326569  | rs13120921 | C | T | 4 | 0.2491   | 0.4159 | 1.0422 | 1.0705 | 0.0054 | 76.33 |
| 15 | 58093606  | rs12595222 | A | G | 4 | 0.9554   | 0.416  | 1.0028 | 1.1091 | 0.001  | 81.59 |
| 12 | 126490843 | rs4761007  | C | T | 4 | 0.04038  | 0.4163 | 0.9204 | 0.9297 | 0.0094 | 73.84 |
| 21 | 40127381  | rs9980807  | C | T | 4 | 0.06215  | 0.4163 | 0.9321 | 0.9441 | 0.0409 | 63.69 |
| 17 | 68391508  | rs4476236  | A | G | 4 | 0.02096  | 0.4165 | 1.0849 | 1.0519 | 0.0631 | 58.86 |
| 18 | 5589104   | rs1785416  | C | T | 4 | 0.5197   | 0.4166 | 0.9777 | 0.9189 | 0.0001 | 85.78 |
| 17 | 68393030  | rs4969120  | C | T | 4 | 0.01995  | 0.4173 | 0.9211 | 0.9504 | 0.0611 | 59.28 |
| 4  | 40498127  | rs17441923 | C | T | 4 | 0.709    | 0.4174 | 0.982  | 0.9091 | 0.004  | 77.48 |
| 4  | 115536217 | rs11935578 | G | T | 4 | 0.2529   | 0.4174 | 0.9595 | 0.9334 | 0.0047 | 76.84 |
| 10 | 110629257 | rs12258374 | C | T | 4 | 0.03993  | 0.4177 | 1.0862 | 1.0587 | 0.0638 | 58.73 |
| 5  | 64329326  | rs1309540  | A | G | 4 | 0.01347  | 0.418  | 1.1272 | 1.0831 | 0.0222 | 68.78 |
| 12 | 68680548  | rs11178026 | C | T | 4 | 0.3003   | 0.4181 | 0.9599 | 0.9266 | 0.0045 | 77.02 |
| 16 | 29922065  | rs11150580 | C | T | 3 | 0.8991   | 0.4182 | 0.9953 | 0.9166 | 0.001  | 85.61 |
| 21 | 40087332  | rs2837225  | A | C | 4 | 0.06791  | 0.4182 | 1.074  | 1.064  | 0.0291 | 66.73 |
| 16 | 7375166   | rs7202208  | A | G | 4 | 0.008576 | 0.4183 | 0.8532 | 0.9123 | 0.0437 | 63.04 |
| 13 | 89221294  | rs7984054  | A | C | 4 | 0.3378   | 0.4185 | 1.1104 | 1.2165 | 0.0064 | 75.6  |
| 11 | 18846017  | rs1384642  | A | G | 4 | 0.02361  | 0.4187 | 1.1365 | 1.095  | 0.0265 | 67.46 |
| 17 | 68394861  | rs4570929  | A | C | 4 | 0.02031  | 0.4194 | 1.0854 | 1.0519 | 0.0613 | 59.23 |
| 17 | 68392999  | rs4969119  | C | T | 4 | 0.02092  | 0.4195 | 0.9217 | 0.9509 | 0.0626 | 58.96 |
| 10 | 110714483 | rs11599609 | C | T | 4 | 0.02777  | 0.4197 | 1.1059 | 1.0665 | 0.0646 | 58.58 |
| 2  | 51639121  | rs2950942  | C | T | 4 | 0.03214  | 0.4198 | 0.9279 | 0.9447 | 0.0228 | 68.59 |
| 4  | 116428916 | rs2135965  | A | G | 4 | 0.4708   | 0.4199 | 0.973  | 0.9323 | 0.006  | 75.87 |
| 5  | 105416189 | rs10056331 | C | T | 4 | 0.858    | 0.4199 | 1.0067 | 1.0768 | 0.0027 | 78.8  |
| 13 | 84142066  | rs9575636  | A | G | 4 | 0.5383   | 0.4201 | 1.0335 | 1.1096 | 0.0021 | 79.52 |
| 2  | 113543867 | rs1446521  | A | G | 4 | 0.0176   | 0.4203 | 0.9117 | 0.9364 | 0.0167 | 70.69 |
| 2  | 51646400  | rs1528813  | A | T | 4 | 0.04125  | 0.4205 | 0.9307 | 0.9471 | 0.034  | 65.42 |
| 10 | 110748773 | rs11592575 | C | T | 4 | 0.02522  | 0.4205 | 0.9037 | 0.9387 | 0.0683 | 57.84 |
| 4  | 92469018  | rs6532296  | A | G | 4 | 0.382    | 0.4207 | 1.0335 | 1.073  | 0.0059 | 75.97 |
| 2  | 64135002  | rs7560803  | A | G | 4 | 0.03192  | 0.4212 | 1.1651 | 1.1118 | 0.0474 | 62.18 |
| 2  | 172243583 | rs10803863 | C | T | 4 | 0.2684   | 0.4212 | 0.9584 | 0.9219 | 0.0009 | 81.86 |
| 17 | 68394639  | rs8078727  | C | T | 4 | 0.0201   | 0.4213 | 0.9212 | 0.9508 | 0.0603 | 59.44 |
| 4  | 92462653  | rs6532291  | A | G | 4 | 0.3549   | 0.4218 | 1.0376 | 1.086  | 0.0014 | 80.64 |
| 8  | 112148387 | rs1896238  | A | G | 4 | 0.2794   | 0.4219 | 0.9572 | 0.9205 | 0.0018 | 80.02 |
| 5  | 115858991 | rs32972    | C | T | 4 | 0.7182   | 0.422  | 1.013  | 1.0891 | 0.0001 | 85.8  |
| 21 | 16548642  | rs2823692  | A | C | 4 | 0.06726  | 0.422  | 0.935  | 0.9266 | 0.0011 | 81.29 |

|    |           |            |   |   |   |          |        |        |        |        |       |
|----|-----------|------------|---|---|---|----------|--------|--------|--------|--------|-------|
| 13 | 43932814  | rs9533862  | C | G | 3 | 0.002227 | 0.4221 | 0.6063 | 0.7634 | 0.0872 | 59.01 |
| 4  | 72340320  | rs12650549 | G | T | 4 | 0.1562   | 0.4224 | 0.9295 | 0.8888 | 0.0002 | 84.39 |
| 11 | 18845442  | rs1384641  | C | G | 4 | 0.02531  | 0.4228 | 0.8822 | 0.9138 | 0.0247 | 68    |
| 2  | 51639646  | rs2715062  | A | G | 4 | 0.03668  | 0.423  | 1.0757 | 1.0567 | 0.0275 | 67.18 |
| 4  | 72342980  | rs2363717  | G | T | 4 | 0.1573   | 0.423  | 1.0756 | 1.1247 | 0.0003 | 84.32 |
| 2  | 51632225  | rs2715086  | A | T | 4 | 0.02663  | 0.4233 | 1.0804 | 1.0575 | 0.0242 | 68.15 |
| 4  | 72339473  | rs10938138 | C | G | 4 | 0.1576   | 0.4233 | 1.0756 | 1.1253 | 0.0002 | 84.49 |
| 15 | 89910099  | rs6496832  | A | G | 4 | 0.2518   | 0.4235 | 1.0453 | 1.0749 | 0.0045 | 77.04 |
| 1  | 48893107  | rs973886   | G | T | 4 | 0.356    | 0.4236 | 1.0734 | 1.1537 | 0.0039 | 77.54 |
| 2  | 51635357  | rs2698028  | C | T | 4 | 0.02469  | 0.424  | 0.924  | 0.9446 | 0.022  | 68.85 |
| 17 | 68389374  | rs4575596  | C | T | 4 | 0.02128  | 0.4242 | 1.0847 | 1.0512 | 0.0616 | 59.18 |
| 4  | 40496876  | rs17513709 | G | T | 4 | 0.7313   | 0.4245 | 0.9834 | 0.91   | 0.0039 | 77.53 |
| 6  | 83348901  | rs1999411  | T | C | 3 | 0.2847   | 0.4245 | 1.1494 | 1.3351 | 0.0022 | 83.62 |
| 7  | 97316254  | rs10486010 | C | T | 4 | 0.6903   | 0.4249 | 1.0202 | 1.105  | 0.0016 | 80.36 |
| 9  | 71237455  | rs3737172  | C | T | 4 | 0.03508  | 0.425  | 1.0993 | 1.0697 | 0.0406 | 63.75 |
| 11 | 2794317   | rs12285496 | C | G | 4 | 0.05793  | 0.4253 | 1.0887 | 1.0721 | 0.03   | 66.48 |
| 7  | 97319748  | rs10486011 | C | T | 4 | 0.6963   | 0.4257 | 0.9805 | 0.9049 | 0.0017 | 80.24 |
| 17 | 787555    | rs7222776  | G | T | 4 | 0.02682  | 0.4259 | 0.9188 | 0.9185 | 0.0003 | 83.95 |
| 2  | 172266418 | rs2138348  | G | T | 4 | 0.27     | 0.426  | 0.9586 | 0.9219 | 0.0007 | 82.32 |
| 14 | 42261110  | rs17633001 | A | G | 4 | 0.1912   | 0.426  | 0.9038 | 0.8656 | 0.0037 | 77.77 |
| 17 | 68395088  | rs4503863  | C | T | 4 | 0.02069  | 0.4261 | 0.9216 | 0.9512 | 0.0595 | 59.61 |
| 4  | 72334532  | rs1563045  | C | T | 4 | 0.1181   | 0.4272 | 0.9262 | 0.894  | 0.0002 | 84.71 |
| 4  | 92464469  | rs955500   | C | T | 4 | 0.4043   | 0.4274 | 0.9691 | 0.9309 | 0.004  | 77.49 |
| 2  | 38427194  | rs11687138 | A | G | 4 | 0.751    | 0.4278 | 0.9872 | 0.908  | 0.0001 | 85.68 |
| 21 | 40131660  | rs1004663  | C | G | 4 | 0.06463  | 0.428  | 1.0722 | 1.0584 | 0.0377 | 64.46 |
| 2  | 51632624  | rs2715089  | A | C | 4 | 0.02744  | 0.4283 | 1.08   | 1.057  | 0.0235 | 68.36 |
| 2  | 17263732  | rs287300   | A | G | 4 | 0.716    | 0.4287 | 1.0178 | 1.0884 | 0.0111 | 73    |
| 4  | 72340027  | rs4694388  | A | G | 4 | 0.1647   | 0.4292 | 0.9306 | 0.8897 | 0.0002 | 84.44 |
| 17 | 9717196   | rs12953287 | C | T | 4 | 0.1281   | 0.4293 | 0.9298 | 0.9172 | 0.0065 | 75.57 |
| 4  | 72341689  | rs2016353  | A | G | 4 | 0.1622   | 0.4296 | 1.0754 | 1.124  | 0.0002 | 84.37 |
| 5  | 64346595  | rs266581   | A | T | 4 | 0.008977 | 0.4297 | 0.8811 | 0.9224 | 0.0156 | 71.09 |
| 17 | 68393965  | rs4969124  | C | T | 4 | 0.02152  | 0.4297 | 1.0846 | 1.0509 | 0.0595 | 59.59 |
| 4  | 72327457  | rs12506660 | C | T | 4 | 0.1132   | 0.43   | 1.0807 | 1.1198 | 0.0001 | 85.27 |
| 10 | 110747661 | rs11194333 | C | T | 4 | 0.02777  | 0.43   | 0.9053 | 0.9399 | 0.0684 | 57.83 |
| 3  | 106367794 | rs884477   | A | G | 3 | 0.0102   | 0.4301 | 0.8757 | 0.919  | 0.0309 | 71.25 |
| 7  | 97318328  | rs13224424 | C | T | 4 | 0.7163   | 0.4305 | 1.0186 | 1.1039 | 0.0017 | 80.21 |
| 2  | 134741150 | rs3791275  | A | G | 3 | 0.03556  | 0.4309 | 0.8273 | 0.8548 | 0.0156 | 75.95 |

|    |           |            |   |   |   |         |        |        |        |        |       |
|----|-----------|------------|---|---|---|---------|--------|--------|--------|--------|-------|
| 2  | 51645727  | rs1609361  | A | G | 4 | 0.03475 | 0.431  | 0.9295 | 0.9465 | 0.0238 | 68.28 |
| 11 | 18844035  | rs4325289  | C | G | 4 | 0.02961 | 0.4311 | 1.1302 | 1.0931 | 0.024  | 68.2  |
| 11 | 13577497  | rs11022897 | C | T | 4 | 0.7545  | 0.4315 | 0.9885 | 0.9357 | 0.0063 | 75.71 |
| 14 | 42258562  | rs1712699  | A | C | 4 | 0.1838  | 0.4315 | 0.9094 | 0.8734 | 0.0032 | 78.25 |
| 17 | 68394559  | rs8078564  | C | G | 4 | 0.0213  | 0.4316 | 0.9219 | 0.9516 | 0.0585 | 59.8  |
| 2  | 172249855 | rs1554166  | G | T | 4 | 0.2922  | 0.4318 | 0.9604 | 0.9229 | 0.0007 | 82.23 |
| 4  | 92460094  | rs6816883  | A | G | 4 | 0.4038  | 0.4323 | 0.9688 | 0.9311 | 0.004  | 77.51 |
| 15 | 58091041  | rs4775230  | C | T | 4 | 0.8928  | 0.4323 | 0.9933 | 1.1102 | 0.0005 | 83.19 |
| 2  | 17251821  | rs287293   | C | T | 4 | 0.7274  | 0.4325 | 1.0171 | 1.0876 | 0.0111 | 73    |
| 2  | 172257876 | rs6757773  | A | T | 4 | 0.2831  | 0.4326 | 0.9597 | 0.9223 | 0.0006 | 82.64 |
| 6  | 52586483  | rs9474254  | G | A | 3 | 0.04517 | 0.4326 | 1.303  | 1.2947 | 0.0074 | 79.62 |
| 8  | 54337603  | rs16918960 | A | T | 4 | 0.02021 | 0.4327 | 0.8753 | 0.9085 | 0.0128 | 72.23 |
| 7  | 44209963  | rs2971668  | C | G | 3 | 0.03591 | 0.4329 | 1.1048 | 1.0785 | 0.0348 | 70.21 |
| 2  | 113541857 | rs2100071  | A | C | 4 | 0.02845 | 0.433  | 0.9203 | 0.9411 | 0.0208 | 69.24 |
| 8  | 129304629 | rs16902742 | A | G | 4 | 0.3538  | 0.4337 | 1.0804 | 1.1508 | 0.0099 | 73.62 |
| 11 | 18877606  | rs2200174  | A | G | 4 | 0.02154 | 0.4338 | 1.1417 | 1.0948 | 0.0246 | 68.04 |
| 4  | 92491016  | rs6532301  | A | G | 4 | 0.4781  | 0.434  | 0.9725 | 0.9272 | 0.003  | 78.44 |
| 2  | 38417031  | rs10177042 | C | G | 4 | 0.6705  | 0.4341 | 1.0165 | 1.0937 | 0.0001 | 85.55 |
| 1  | 95558817  | rs17113368 | C | T | 4 | 0.267   | 0.4342 | 0.935  | 0.8909 | 0.0035 | 77.91 |
| 1  | 199367062 | rs10800760 | A | G | 4 | 0.302   | 0.4343 | 1.0451 | 1.0843 | 0.0031 | 78.31 |
| 4  | 72332316  | rs2045012  | G | T | 4 | 0.1206  | 0.4343 | 1.079  | 1.119  | 0.0001 | 85.34 |
| 2  | 29148258  | rs17744093 | C | G | 4 | 0.02975 | 0.4344 | 1.0955 | 1.0623 | 0.0496 | 61.71 |
| 2  | 51630745  | rs11563043 | C | G | 4 | 0.02832 | 0.4344 | 0.9264 | 0.9465 | 0.0228 | 68.6  |
| 14 | 78027611  | rs11622766 | A | G | 4 | 0.3282  | 0.4344 | 0.9655 | 0.9361 | 0.0046 | 76.94 |
| 2  | 51632158  | rs2715084  | C | T | 4 | 0.02845 | 0.4347 | 1.0794 | 1.0564 | 0.0228 | 68.57 |
| 9  | 71237419  | rs1217339  | A | G | 4 | 0.03743 | 0.4351 | 0.9107 | 0.9359 | 0.039  | 64.15 |
| 3  | 178807690 | rs9855198  | A | G | 4 | 0.01877 | 0.4353 | 1.0967 | 1.0577 | 0.0524 | 61.09 |
| 9  | 71237918  | rs1217338  | C | T | 4 | 0.03861 | 0.4355 | 0.9117 | 0.936  | 0.0381 | 64.38 |
| 12 | 65462660  | rs994302   | C | G | 4 | 0.06695 | 0.4357 | 1.0664 | 1.0535 | 0.0349 | 65.18 |
| 2  | 29142915  | rs17744052 | A | G | 4 | 0.03704 | 0.4358 | 0.9178 | 0.9422 | 0.0456 | 62.6  |
| 10 | 122962348 | rs11593067 | C | T | 4 | 0.5445  | 0.436  | 0.9792 | 0.9429 | 0.0114 | 72.87 |
| 2  | 172300209 | rs6722757  | A | G | 4 | 0.3003  | 0.4361 | 0.961  | 0.9238 | 0.0008 | 82.13 |
| 17 | 68395153  | rs7223107  | C | T | 4 | 0.02192 | 0.4364 | 0.9223 | 0.952  | 0.0577 | 59.97 |
| 10 | 110697815 | rs7070406  | A | T | 4 | 0.02396 | 0.4368 | 1.1081 | 1.0653 | 0.0552 | 60.5  |
| 10 | 110747675 | rs11194334 | A | C | 4 | 0.03026 | 0.4369 | 0.8982 | 0.935  | 0.0668 | 58.14 |
| 1  | 75124915  | rs6664850  | A | G | 4 | 0.3835  | 0.4373 | 1.0346 | 1.0768 | 0.0027 | 78.77 |
| 7  | 125563862 | rs626762   | A | C | 4 | 0.05575 | 0.4376 | 0.902  | 0.9206 | 0.023  | 68.53 |

|    |           |            |   |   |   |          |        |        |        |        |       |
|----|-----------|------------|---|---|---|----------|--------|--------|--------|--------|-------|
| 4  | 92478508  | rs1534556  | A | G | 4 | 0.6293   | 0.4377 | 1.019  | 1.081  | 0.0016 | 80.4  |
| 4  | 72334992  | rs1319630  | C | T | 4 | 0.1327   | 0.4379 | 1.0765 | 1.1161 | 0.0002 | 84.84 |
| 12 | 68683295  | rs1565723  | C | T | 4 | 0.3361   | 0.438  | 0.9628 | 0.9287 | 0.0038 | 77.68 |
| 2  | 113537588 | rs2515404  | C | T | 4 | 0.02926  | 0.4384 | 1.0861 | 1.0618 | 0.021  | 69.18 |
| 4  | 92459948  | rs6532290  | G | T | 4 | 0.4311   | 0.439  | 1.0304 | 1.0734 | 0.0037 | 77.73 |
| 8  | 4083982   | rs17069682 | A | C | 4 | 0.2449   | 0.439  | 1.1054 | 1.1976 | 0.0004 | 83.73 |
| 6  | 117190566 | rs682747   | A | C | 4 | 0.05519  | 0.4393 | 0.9307 | 0.9378 | 0.0126 | 72.34 |
| 4  | 72328528  | rs3907208  | A | T | 4 | 0.1194   | 0.4394 | 1.0797 | 1.118  | 0.0001 | 85.35 |
| 2  | 172294897 | rs2292815  | C | G | 4 | 0.3027   | 0.44   | 0.9612 | 0.9238 | 0.0007 | 82.47 |
| 1  | 75146613  | rs17562236 | A | G | 4 | 0.3894   | 0.4404 | 0.967  | 0.9294 | 0.0028 | 78.68 |
| 10 | 110679319 | rs17700354 | C | T | 4 | 0.02168  | 0.4404 | 1.11   | 1.0657 | 0.0499 | 61.64 |
| 6  | 1653870   | rs9405506  | C | T | 4 | 0.7647   | 0.4407 | 1.0125 | 1.0837 | 0.0017 | 80.15 |
| 2  | 51649917  | rs1528809  | A | G | 4 | 0.03847  | 0.4408 | 1.0755 | 1.0551 | 0.0267 | 67.42 |
| 6  | 51283445  | rs13211684 | C | T | 4 | 0.3399   | 0.4409 | 0.9656 | 0.9359 | 0.0049 | 76.74 |
| 1  | 199367119 | rs12025414 | A | G | 4 | 0.2923   | 0.4411 | 0.956  | 0.923  | 0.003  | 78.51 |
| 2  | 172268975 | rs12185567 | A | C | 4 | 0.2998   | 0.4412 | 1.0406 | 1.083  | 0.0006 | 82.79 |
| 3  | 29735511  | rs1440524  | C | T | 4 | 0.4363   | 0.4415 | 1.0286 | 1.0666 | 0.0055 | 76.23 |
| 12 | 128846311 | rs1376796  | G | T | 4 | 0.05853  | 0.4416 | 0.9302 | 0.9418 | 0.0221 | 68.83 |
| 2  | 172244094 | rs11678984 | G | T | 4 | 0.3092   | 0.4417 | 0.9617 | 0.924  | 0.0007 | 82.49 |
| 4  | 92530648  | rs6820807  | A | T | 4 | 0.4518   | 0.4419 | 0.9713 | 0.9332 | 0.006  | 75.86 |
| 1  | 75147442  | rs12755578 | C | G | 4 | 0.4025   | 0.4422 | 0.9676 | 0.9292 | 0.0027 | 78.76 |
| 10 | 110680293 | rs17700389 | G | T | 4 | 0.0218   | 0.4426 | 1.1099 | 1.0655 | 0.0495 | 61.71 |
| 2  | 113503827 | rs4849143  | C | G | 4 | 0.01677  | 0.4427 | 0.9132 | 0.9445 | 0.0309 | 66.22 |
| 5  | 115859204 | rs32973    | A | G | 3 | 0.1932   | 0.4429 | 0.9408 | 0.8942 | 0.0021 | 83.81 |
| 18 | 40396618  | rs9949152  | C | T | 4 | 0.03277  | 0.4431 | 1.1026 | 1.0647 | 0.0582 | 59.86 |
| 16 | 7375151   | rs7202052  | A | G | 4 | 0.01073  | 0.4432 | 0.8578 | 0.9162 | 0.0407 | 63.73 |
| 4  | 92528251  | rs1528579  | A | T | 4 | 0.4614   | 0.4433 | 0.9719 | 0.933  | 0.0056 | 76.21 |
| 3  | 8907353   | rs658339   | A | G | 3 | 0.007626 | 0.4436 | 0.7163 | 0.819  | 0.0568 | 65.12 |
| 5  | 104055382 | rs17350038 | C | G | 4 | 0.07337  | 0.4437 | 1.0855 | 1.0868 | 0.0035 | 77.92 |
| 2  | 38443251  | rs11687878 | G | T | 4 | 0.7705   | 0.444  | 1.012  | 1.0984 | 0.0001 | 85.75 |
| 4  | 92528566  | rs10856885 | C | T | 4 | 0.459    | 0.4441 | 0.9718 | 0.9335 | 0.006  | 75.9  |
| 5  | 13526523  | rs16902590 | C | T | 4 | 0.02897  | 0.4442 | 0.8628 | 0.8649 | 0.0003 | 83.91 |
| 8  | 4084387   | rs17069688 | C | G | 4 | 0.242    | 0.4443 | 1.1062 | 1.196  | 0.0003 | 83.8  |
| 4  | 92524147  | rs6844256  | C | G | 4 | 0.5708   | 0.4447 | 0.9785 | 0.932  | 0.0041 | 77.38 |
| 4  | 92484643  | rs1881454  | C | G | 4 | 0.4221   | 0.4448 | 1.0307 | 1.0697 | 0.0054 | 76.33 |
| 2  | 38441642  | rs11900967 | A | T | 4 | 0.7831   | 0.4455 | 0.9888 | 0.9107 | 0.0001 | 85.75 |
| 6  | 30248519  | rs13212414 | A | T | 4 | 0.01899  | 0.4456 | 0.838  | 0.8901 | 0.0237 | 68.32 |

|    |           |            |   |   |   |          |        |        |        |        |       |
|----|-----------|------------|---|---|---|----------|--------|--------|--------|--------|-------|
| 5  | 178244599 | rs6894878  | A | G | 3 | 0.3075   | 0.4458 | 1.0578 | 1.1499 | 0.0001 | 89.61 |
| 17 | 9717002   | rs12936268 | A | T | 4 | 0.1489   | 0.4459 | 0.9332 | 0.9197 | 0.0062 | 75.79 |
| 22 | 23839747  | rs713876   | A | G | 4 | 0.534    | 0.4459 | 1.0239 | 1.0666 | 0.0086 | 74.29 |
| 5  | 105465931 | rs10066864 | C | T | 4 | 0.9529   | 0.4462 | 1.003  | 0.9099 | 0.002  | 79.79 |
| 4  | 92489733  | rs6841781  | C | T | 4 | 0.432    | 0.4463 | 1.0301 | 1.0692 | 0.0056 | 76.16 |
| 6  | 94859869  | rs2787950  | A | C | 4 | 0.01482  | 0.4464 | 0.9162 | 0.9513 | 0.05   | 61.6  |
| 6  | 94782808  | rs1352380  | C | T | 4 | 0.02624  | 0.4465 | 1.0801 | 1.0488 | 0.0551 | 60.52 |
| 9  | 71238297  | rs2991695  | A | G | 4 | 0.04307  | 0.4473 | 0.9136 | 0.938  | 0.0397 | 63.98 |
| 4  | 92521289  | rs2178221  | C | T | 4 | 0.5843   | 0.4475 | 0.9792 | 0.9323 | 0.0041 | 77.42 |
| 2  | 51648256  | rs1581667  | C | T | 4 | 0.04171  | 0.4481 | 0.9313 | 0.9483 | 0.0243 | 68.13 |
| 2  | 51649426  | rs2698014  | G | T | 4 | 0.04211  | 0.4482 | 1.0736 | 1.0545 | 0.0246 | 68.04 |
| 5  | 104037774 | rs17415237 | A | C | 4 | 0.07398  | 0.4483 | 1.0853 | 1.0839 | 0.0047 | 76.86 |
| 5  | 64338340  | rs1309534  | A | G | 4 | 0.01434  | 0.4484 | 1.126  | 1.0798 | 0.0172 | 70.48 |
| 7  | 152454874 | rs2311855  | G | T | 4 | 0.279    | 0.4484 | 0.9623 | 0.9341 | 0.002  | 79.66 |
| 10 | 110692416 | rs11596345 | A | G | 4 | 0.02621  | 0.4485 | 1.1063 | 1.0637 | 0.0542 | 60.7  |
| 10 | 110687958 | rs11595032 | A | T | 4 | 0.0251   | 0.4486 | 0.9032 | 0.9398 | 0.0523 | 61.12 |
| 2  | 172277833 | rs312918   | C | G | 4 | 0.3307   | 0.4487 | 1.0378 | 1.082  | 0.0005 | 83.16 |
| 2  | 38418894  | rs11884107 | C | T | 4 | 0.7933   | 0.4491 | 1.0106 | 1.0939 | 0.0002 | 85.17 |
| 2  | 64137490  | rs13429819 | A | G | 4 | 0.03418  | 0.4491 | 0.8592 | 0.903  | 0.0418 | 63.47 |
| 4  | 72345306  | rs2579331  | A | G | 4 | 0.1508   | 0.4496 | 1.0739 | 1.1091 | 0.0004 | 83.41 |
| 16 | 45321875  | rs2075157  | C | T | 4 | 0.7554   | 0.4497 | 0.9838 | 0.9063 | 0.0015 | 80.49 |
| 2  | 172285522 | rs10206062 | A | T | 4 | 0.3184   | 0.4503 | 0.9625 | 0.9246 | 0.0005 | 82.92 |
| 2  | 64129701  | rs17028360 | A | G | 4 | 0.002292 | 0.4507 | 0.7867 | 0.8871 | 0.0285 | 66.88 |
| 11 | 83240882  | rs7943773  | C | T | 4 | 0.5211   | 0.4508 | 1.0659 | 1.1852 | 0.0059 | 75.94 |
| 15 | 36730429  | rs10852029 | A | G | 4 | 0.04543  | 0.4508 | 1.0741 | 1.0598 | 0.0128 | 72.26 |
| 3  | 117050666 | rs3772968  | A | G | 4 | 0.02711  | 0.4509 | 1.165  | 1.0952 | 0.0688 | 57.75 |
| 4  | 92523247  | rs6837355  | A | G | 4 | 0.5929   | 0.4509 | 0.9797 | 0.9327 | 0.004  | 77.46 |
| 8  | 54348944  | rs9792157  | A | C | 4 | 0.01968  | 0.4509 | 0.8736 | 0.9093 | 0.0102 | 73.45 |
| 16 | 70564733  | rs7197967  | A | G | 4 | 0.01981  | 0.4509 | 1.1369 | 1.099  | 0.0049 | 76.73 |
| 12 | 68683857  | rs1565725  | C | T | 4 | 0.3504   | 0.4511 | 1.0381 | 1.0757 | 0.0036 | 77.81 |
| 13 | 89487776  | rs1491005  | C | T | 4 | 0.03891  | 0.4512 | 1.0955 | 1.0634 | 0.0448 | 62.77 |
| 17 | 68396477  | rs8069336  | A | G | 4 | 0.02378  | 0.4515 | 1.0831 | 1.0492 | 0.0548 | 60.58 |
| 6  | 116133539 | rs9400871  | T | A | 3 | 0.01413  | 0.4516 | 1.1558 | 1.1375 | 0.0029 | 82.88 |
| 13 | 76023588  | rs285669   | A | G | 4 | 0.01406  | 0.452  | 0.9103 | 0.9423 | 0.0193 | 69.75 |
| 2  | 51633654  | rs2222779  | A | G | 4 | 0.04528  | 0.4521 | 0.9319 | 0.9494 | 0.0297 | 66.55 |
| 7  | 152443576 | rs607348   | C | T | 4 | 0.3239   | 0.4525 | 1.0381 | 1.0723 | 0.0027 | 78.86 |
| 10 | 110687591 | rs6584909  | A | G | 4 | 0.02482  | 0.4527 | 1.1074 | 1.0638 | 0.0507 | 61.46 |

|    |           |            |   |   |   |         |        |        |        |        |       |
|----|-----------|------------|---|---|---|---------|--------|--------|--------|--------|-------|
| 1  | 75159525  | rs12121720 | A | G | 4 | 0.4067  | 0.4528 | 1.033  | 1.0749 | 0.0024 | 79.15 |
| 13 | 84143232  | rs12100200 | A | G | 4 | 0.6796  | 0.4528 | 1.0222 | 1.101  | 0.0021 | 79.53 |
| 2  | 172285362 | rs7597387  | C | T | 4 | 0.3237  | 0.453  | 1.0386 | 1.0812 | 0.0005 | 82.99 |
| 4  | 72336555  | rs2060903  | A | G | 4 | 0.1483  | 0.453  | 0.9308 | 0.8983 | 0.0002 | 84.88 |
| 2  | 172288200 | rs973889   | A | G | 4 | 0.3265  | 0.4531 | 0.9631 | 0.9253 | 0.0006 | 82.81 |
| 2  | 51649455  | rs2715057  | C | T | 4 | 0.04291 | 0.4532 | 0.9317 | 0.9487 | 0.0235 | 68.35 |
| 2  | 51649652  | rs1528811  | C | T | 4 | 0.04447 | 0.4532 | 0.9322 | 0.9489 | 0.0246 | 68.02 |
| 2  | 51652775  | rs2715076  | A | C | 4 | 0.04441 | 0.4533 | 1.0727 | 1.0538 | 0.0246 | 68.04 |
| 2  | 172294131 | rs10207085 | G | T | 4 | 0.3216  | 0.4534 | 1.0388 | 1.0807 | 0.0006 | 82.77 |
| 12 | 10712107  | rs7297205  | C | T | 4 | 0.0131  | 0.4534 | 1.0957 | 1.0524 | 0.0449 | 62.75 |
| 12 | 68683835  | rs1565724  | A | C | 4 | 0.3583  | 0.4534 | 0.9639 | 0.9302 | 0.0038 | 77.65 |
| 7  | 152475034 | rs7810943  | A | G | 4 | 0.4006  | 0.4535 | 1.0303 | 1.0656 | 0.0044 | 77.1  |
| 2  | 172488378 | rs10202823 | C | T | 3 | 0.6502  | 0.4536 | 1.0178 | 1.1023 | 0.0001 | 89.47 |
| 4  | 72337409  | rs10470737 | A | G | 4 | 0.1495  | 0.4537 | 0.931  | 0.8987 | 0.0002 | 84.8  |
| 11 | 86022325  | rs1938928  | C | T | 4 | 0.441   | 0.4537 | 1.0493 | 1.1049 | 0.0122 | 72.53 |
| 5  | 104047674 | rs12516369 | A | G | 4 | 0.0776  | 0.454  | 1.0842 | 1.0827 | 0.0047 | 76.84 |
| 13 | 84147159  | rs9575638  | G | T | 4 | 0.6861  | 0.454  | 0.9787 | 0.9081 | 0.0021 | 79.57 |
| 5  | 168144746 | rs11134531 | A | G | 4 | 0.06997 | 0.4541 | 0.9356 | 0.9422 | 0.0111 | 73.03 |
| 10 | 110686488 | rs12258030 | A | G | 4 | 0.02387 | 0.4541 | 1.1082 | 1.064  | 0.0487 | 61.9  |
| 8  | 5510132   | rs10100498 | A | C | 4 | 0.6486  | 0.4544 | 0.9817 | 0.9329 | 0.006  | 75.91 |
| 10 | 110734026 | rs11596046 | A | G | 4 | 0.029   | 0.4544 | 0.9054 | 0.9408 | 0.0548 | 60.58 |
| 10 | 110734457 | rs17701356 | A | G | 4 | 0.029   | 0.4544 | 0.9054 | 0.9408 | 0.0548 | 60.58 |
| 10 | 110734927 | rs17779611 | C | T | 4 | 0.029   | 0.4544 | 0.9054 | 0.9408 | 0.0548 | 60.58 |
| 1  | 75134581  | rs1327098  | A | G | 4 | 0.4748  | 0.4546 | 1.0289 | 1.0733 | 0.0038 | 77.68 |
| 2  | 172350303 | rs12692973 | C | T | 4 | 0.3212  | 0.4547 | 0.9626 | 0.9273 | 0.0009 | 81.83 |
| 8  | 17651768  | rs3862101  | C | T | 4 | 0.02903 | 0.4548 | 1.1132 | 1.0699 | 0.0458 | 62.54 |
| 13 | 53936097  | rs9536735  | A | G | 4 | 0.9194  | 0.4553 | 1.0059 | 1.1064 | 0.0074 | 74.96 |
| 4  | 183403463 | rs7696796  | A | G | 4 | 0.09072 | 0.4554 | 0.9347 | 0.9333 | 0.0058 | 76.04 |
| 11 | 83252000  | rs2037194  | A | G | 4 | 0.5197  | 0.4557 | 0.9357 | 0.8385 | 0.0051 | 76.56 |
| 17 | 68395857  | rs6501572  | G | T | 4 | 0.02515 | 0.4557 | 1.0823 | 1.0487 | 0.0554 | 60.45 |
| 2  | 38366214  | rs875654   | C | T | 4 | 0.7735  | 0.4566 | 0.9861 | 0.9183 | 0.0051 | 76.56 |
| 8  | 135092098 | rs11998159 | A | G | 4 | 0.06789 | 0.4566 | 0.9386 | 0.9484 | 0.0209 | 69.2  |
| 8  | 54346783  | rs2162181  | C | T | 4 | 0.02256 | 0.4568 | 1.1411 | 1.0987 | 0.0097 | 73.72 |
| 10 | 110740736 | rs11593939 | C | T | 4 | 0.02978 | 0.4568 | 0.9059 | 0.9413 | 0.0561 | 60.31 |
| 2  | 134738798 | rs3828176  | A | T | 4 | 0.01862 | 0.4572 | 0.8165 | 0.8702 | 0.0218 | 68.92 |
| 21 | 32946315  | rs2833934  | C | T | 4 | 0.04252 | 0.4574 | 1.2192 | 1.1375 | 0.0565 | 60.23 |
| 4  | 92514491  | rs7672780  | A | G | 4 | 0.5717  | 0.4575 | 1.022  | 1.0713 | 0.0039 | 77.6  |

|    |           |            |   |   |   |         |        |        |        |        |       |
|----|-----------|------------|---|---|---|---------|--------|--------|--------|--------|-------|
| 8  | 54355648  | rs2059547  | C | T | 4 | 0.02239 | 0.4577 | 0.8766 | 0.9097 | 0.0089 | 74.11 |
| 18 | 6397483   | rs4797242  | A | C | 4 | 0.01784 | 0.4578 | 0.9124 | 0.9414 | 0.0151 | 71.3  |
| 2  | 38418548  | rs13431831 | C | G | 4 | 0.8395  | 0.4579 | 0.9919 | 0.9159 | 0.0002 | 85.1  |
| 13 | 39443193  | rs7338145  | A | G | 4 | 0.5714  | 0.458  | 0.9791 | 0.9346 | 0.0026 | 78.89 |
| 2  | 51649771  | rs1528810  | C | T | 4 | 0.04575 | 0.4583 | 0.9326 | 0.9493 | 0.0239 | 68.25 |
| 6  | 121666786 | rs9320803  | C | T | 4 | 0.01097 | 0.4583 | 0.8903 | 0.9396 | 0.0514 | 61.32 |
| 6  | 94777061  | rs10806484 | A | C | 4 | 0.03018 | 0.4592 | 1.078  | 1.0478 | 0.0517 | 61.24 |
| 2  | 172313645 | rs4667694  | A | G | 4 | 0.3244  | 0.4594 | 1.0386 | 1.0794 | 0.0006 | 82.56 |
| 5  | 104020427 | rs7445539  | A | G | 4 | 0.07995 | 0.4595 | 1.0835 | 1.0834 | 0.0036 | 77.84 |
| 10 | 110740500 | rs11593900 | C | T | 4 | 0.03027 | 0.4603 | 0.9057 | 0.9416 | 0.0563 | 60.26 |
| 10 | 110736026 | rs11597293 | A | C | 4 | 0.0298  | 0.4606 | 0.9059 | 0.9415 | 0.0538 | 60.79 |
| 8  | 54352873  | rs9792266  | A | T | 4 | 0.0202  | 0.4609 | 0.8741 | 0.9104 | 0.0093 | 73.93 |
| 2  | 172343943 | rs10174525 | C | T | 4 | 0.3308  | 0.4615 | 1.038  | 1.0781 | 0.0007 | 82.25 |
| 12 | 10711585  | rs10845199 | C | T | 4 | 0.01318 | 0.4616 | 0.9143 | 0.9524 | 0.0472 | 62.23 |
| 6  | 99031254  | rs6941388  | A | T | 4 | 0.01657 | 0.4617 | 0.8071 | 0.8735 | 0.0154 | 71.17 |
| 2  | 172345846 | rs6705200  | A | G | 4 | 0.3312  | 0.462  | 0.9634 | 0.9277 | 0.0008 | 82.21 |
| 2  | 172348869 | rs10497374 | A | G | 4 | 0.3312  | 0.462  | 0.9634 | 0.9277 | 0.0008 | 82.21 |
| 9  | 10616389  | rs1322294  | A | G | 4 | 0.6119  | 0.462  | 1.0254 | 1.0888 | 0.0038 | 77.67 |
| 10 | 124859893 | rs17104648 | C | G | 4 | 0.05971 | 0.462  | 1.1788 | 1.133  | 0.0276 | 67.15 |
| 11 | 115309136 | rs427875   | A | C | 4 | 0.02528 | 0.4621 | 1.0939 | 1.0658 | 0.0118 | 72.68 |
| 2  | 172317202 | rs10184866 | G | T | 4 | 0.3292  | 0.4625 | 1.0382 | 1.0786 | 0.0006 | 82.57 |
| 5  | 104050721 | rs12513560 | C | T | 4 | 0.08427 | 0.4625 | 0.9239 | 0.925  | 0.0047 | 76.84 |
| 2  | 172349291 | rs11757    | C | G | 4 | 0.338   | 0.4626 | 0.9639 | 0.9281 | 0.0008 | 82.06 |
| 8  | 140500127 | rs12680834 | C | T | 4 | 0.8782  | 0.4626 | 0.993  | 0.9254 | 0.0045 | 77.03 |
| 5  | 104017956 | rs12189083 | C | T | 4 | 0.08162 | 0.4627 | 0.9234 | 0.9234 | 0.0035 | 77.96 |
| 4  | 72333961  | rs9790757  | C | T | 4 | 0.1519  | 0.4631 | 1.0768 | 1.12   | 0.0001 | 85.79 |
| 4  | 187045575 | rs13110782 | A | G | 4 | 0.7749  | 0.4634 | 0.9897 | 0.9362 | 0.0022 | 79.41 |
| 8  | 135211030 | rs1446995  | G | T | 4 | 0.01684 | 0.4635 | 1.0854 | 1.0566 | 0.0109 | 73.1  |
| 6  | 116137208 | rs9320546  | T | C | 3 | 0.01723 | 0.4639 | 1.1525 | 1.1346 | 0.0027 | 83.04 |
| 12 | 126490295 | rs10847348 | C | T | 4 | 0.05551 | 0.464  | 1.0793 | 1.0709 | 0.005  | 76.66 |
| 1  | 65085401  | rs10789166 | A | G | 4 | 0.07323 | 0.4641 | 1.0972 | 1.0875 | 0.0085 | 74.36 |
| 3  | 117048717 | rs2972479  | C | T | 4 | 0.02899 | 0.4641 | 1.1621 | 1.0928 | 0.0651 | 58.47 |
| 12 | 97094264  | rs1847534  | A | C | 4 | 0.5715  | 0.4641 | 1.0225 | 0.9272 | 0.0011 | 81.24 |
| 2  | 172334389 | rs10194102 | C | G | 4 | 0.3352  | 0.4643 | 1.0377 | 1.0781 | 0.0007 | 82.5  |
| 6  | 136476887 | rs3757154  | C | G | 4 | 0.4631  | 0.4643 | 0.9739 | 0.939  | 0.0039 | 77.56 |
| 9  | 10573907  | rs4741038  | A | T | 3 | 0.2101  | 0.4643 | 1.0993 | 1.1673 | 0.0041 | 81.85 |
| 11 | 2799123   | rs12294675 | A | G | 4 | 0.07443 | 0.4644 | 1.0905 | 1.0729 | 0.0256 | 67.74 |



|    |           |            |   |   |   |         |        |        |        |        |       |
|----|-----------|------------|---|---|---|---------|--------|--------|--------|--------|-------|
| 7  | 52155467  | rs2953431  | A | G | 4 | 0.0461  | 0.4646 | 1.0723 | 1.059  | 0.0087 | 74.26 |
| 12 | 68673713  | rs7134411  | C | T | 4 | 0.3401  | 0.4651 | 1.038  | 1.0724 | 0.0033 | 78.19 |
| 1  | 75167786  | rs12127639 | C | G | 4 | 0.4555  | 0.4655 | 0.9711 | 0.9321 | 0.0025 | 79.03 |
| 1  | 75176175  | rs10782637 | A | C | 4 | 0.4603  | 0.4657 | 0.9714 | 0.9322 | 0.0026 | 78.98 |
| 2  | 172328016 | rs4668412  | A | G | 4 | 0.338   | 0.4658 | 0.9639 | 0.9275 | 0.0006 | 82.64 |
| 4  | 92480699  | rs4593093  | G | T | 4 | 0.4898  | 0.4658 | 0.9743 | 0.9374 | 0.0051 | 76.58 |
| 8  | 54352922  | rs9792384  | A | G | 4 | 0.02096 | 0.4658 | 0.8748 | 0.911  | 0.009  | 74.1  |
| 2  | 172335589 | rs11904009 | G | T | 4 | 0.3413  | 0.4662 | 1.0372 | 1.0777 | 0.0007 | 82.44 |
| 2  | 98851853  | rs4851165  | C | T | 4 | 0.06327 | 0.4664 | 0.879  | 0.8941 | 0.0071 | 75.16 |
| 8  | 54353550  | rs16918988 | C | T | 4 | 0.02256 | 0.4669 | 1.1437 | 1.0996 | 0.0083 | 74.46 |
| 2  | 51624921  | rs1919434  | C | T | 4 | 0.02726 | 0.467  | 1.0793 | 1.0521 | 0.023  | 68.51 |
| 6  | 121445811 | rs9401367  | C | T | 4 | 0.01803 | 0.4676 | 0.9005 | 0.9416 | 0.0437 | 63.02 |
| 10 | 128737210 | rs7092964  | C | T | 4 | 0.9677  | 0.4676 | 1.0025 | 0.8949 | 0.0015 | 80.55 |
| 16 | 6838730   | rs8054432  | C | T | 4 | 0.02865 | 0.4676 | 1.0872 | 1.0699 | 0.0029 | 78.56 |
| 8  | 129307851 | rs7812998  | A | G | 4 | 0.3878  | 0.468  | 1.0746 | 1.1408 | 0.0086 | 74.28 |
| 2  | 51645271  | rs1569190  | G | T | 4 | 0.0614  | 0.4681 | 0.9344 | 0.9476 | 0.021  | 69.16 |
| 4  | 149818435 | rs4435727  | C | G | 4 | 0.0718  | 0.4685 | 0.9283 | 0.9376 | 0.0123 | 72.47 |
| 8  | 54356785  | rs2376422  | A | G | 4 | 0.02068 | 0.4685 | 1.1436 | 1.0969 | 0.0093 | 73.92 |
| 1  | 48859991  | rs12566140 | A | G | 4 | 0.8444  | 0.4686 | 1.0143 | 1.1317 | 0.0032 | 78.24 |
| 3  | 29756855  | rs1866774  | A | G | 4 | 0.4522  | 0.4689 | 1.0271 | 1.06   | 0.0071 | 75.2  |
| 5  | 104018213 | rs12189097 | C | T | 4 | 0.08501 | 0.4689 | 0.9242 | 0.924  | 0.0032 | 78.2  |
| 8  | 129311457 | rs7840538  | C | G | 4 | 0.3899  | 0.4689 | 1.0743 | 1.1406 | 0.0085 | 74.33 |
| 2  | 51628777  | rs1528815  | C | G | 4 | 0.02698 | 0.469  | 1.0795 | 1.0522 | 0.0217 | 68.93 |
| 5  | 104028035 | rs6892501  | A | C | 4 | 0.08634 | 0.4693 | 1.0817 | 1.082  | 0.0033 | 78.13 |
| 3  | 151327125 | rs12485454 | C | T | 4 | 0.8877  | 0.4694 | 1.0054 | 1.067  | 0.0046 | 76.91 |
| 6  | 94788810  | rs10944710 | C | T | 4 | 0.02729 | 0.4696 | 1.0795 | 1.0467 | 0.0518 | 61.21 |
| 6  | 136508827 | rs2170231  | C | T | 4 | 0.5469  | 0.4696 | 0.9786 | 0.9336 | 0.0008 | 82.04 |
| 4  | 92539047  | rs2904382  | A | G | 4 | 0.5694  | 0.4698 | 1.0221 | 1.0684 | 0.0044 | 77.13 |
| 10 | 110709762 | rs11593385 | C | T | 4 | 0.02915 | 0.4701 | 0.9056 | 0.9427 | 0.0535 | 60.86 |
| 8  | 135210399 | rs7011020  | A | G | 4 | 0.02149 | 0.4704 | 0.9235 | 0.947  | 0.0109 | 73.09 |
| 2  | 51628765  | rs1528816  | A | G | 4 | 0.02716 | 0.4706 | 1.0794 | 1.052  | 0.0217 | 68.93 |
| 2  | 113541556 | rs7599662  | C | T | 4 | 0.0325  | 0.4707 | 0.9207 | 0.9442 | 0.0187 | 69.97 |
| 12 | 126488790 | rs11059127 | G | T | 4 | 0.06791 | 0.4708 | 1.0762 | 1.07   | 0.0054 | 76.31 |
| 6  | 20974836  | rs9368246  | C | T | 4 | 0.7403  | 0.4709 | 1.0123 | 1.061  | 0.0088 | 74.17 |
| 6  | 136500942 | rs2046091  | A | G | 4 | 0.5343  | 0.4709 | 0.9778 | 0.9361 | 0.0016 | 80.27 |
| 13 | 54051478  | rs9597010  | A | T | 4 | 0.3578  | 0.4709 | 1.0466 | 0.9041 | 0.0004 | 83.43 |
| 8  | 129311983 | rs10505507 | C | T | 4 | 0.3946  | 0.4711 | 1.0735 | 1.1401 | 0.0084 | 74.39 |

|    |           |            |   |   |   |          |        |        |        |        |       |
|----|-----------|------------|---|---|---|----------|--------|--------|--------|--------|-------|
| 13 | 39470053  | rs7339164  | A | G | 4 | 0.4594   | 0.4712 | 1.0268 | 1.0693 | 0.0011 | 81.41 |
| 2  | 51636011  | rs2698026  | A | G | 4 | 0.04094  | 0.4713 | 1.0746 | 1.0542 | 0.0169 | 70.59 |
| 8  | 129316558 | rs9693045  | C | T | 4 | 0.3951   | 0.4714 | 1.0735 | 1.1405 | 0.0081 | 74.55 |
| 2  | 51651289  | rs2698011  | G | T | 4 | 0.04472  | 0.4719 | 0.9323 | 0.9506 | 0.0232 | 68.47 |
| 2  | 51626532  | rs1358580  | A | G | 4 | 0.02751  | 0.472  | 0.9266 | 0.9508 | 0.0219 | 68.87 |
| 13 | 104284662 | rs9519490  | C | T | 4 | 0.4922   | 0.472  | 1.0308 | 1.0725 | 0.0092 | 73.97 |
| 2  | 172272267 | rs312924   | A | T | 4 | 0.3685   | 0.4724 | 0.9661 | 0.9265 | 0.0004 | 83.68 |
| 7  | 26555282  | rs4140898  | A | G | 3 | 0.9362   | 0.4724 | 1.0033 | 1.0817 | 0.0025 | 83.32 |
| 4  | 92512505  | rs1358554  | C | T | 4 | 0.6318   | 0.473  | 0.9818 | 0.9356 | 0.0038 | 77.64 |
| 6  | 124511753 | rs9388306  | C | G | 4 | 0.0146   | 0.473  | 1.1414 | 1.0743 | 0.042  | 63.42 |
| 1  | 75170858  | rs12732265 | C | T | 4 | 0.4863   | 0.4734 | 1.0278 | 1.0712 | 0.0027 | 78.83 |
| 5  | 64299723  | rs13178969 | C | T | 4 | 0.01454  | 0.4734 | 1.125  | 1.0756 | 0.0163 | 70.83 |
| 12 | 126488548 | rs11059124 | A | G | 4 | 0.06936  | 0.4737 | 1.0758 | 1.0697 | 0.0053 | 76.43 |
| 6  | 136500931 | rs2046092  | A | G | 4 | 0.5482   | 0.474  | 0.9785 | 0.9364 | 0.0016 | 80.37 |
| 21 | 40088875  | rs2837226  | A | C | 4 | 0.06928  | 0.4746 | 1.071  | 1.0554 | 0.025  | 67.92 |
| 2  | 172376928 | rs3770452  | A | G | 4 | 0.3206   | 0.4747 | 0.9626 | 0.9305 | 0.0009 | 81.77 |
| 13 | 89159717  | rs9560417  | A | G | 4 | 0.4054   | 0.4747 | 0.9044 | 0.8194 | 0.0028 | 78.68 |
| 21 | 40145943  | rs2837258  | A | C | 4 | 0.07279  | 0.4748 | 1.0706 | 1.0566 | 0.0227 | 68.63 |
| 4  | 92510260  | rs7654013  | G | T | 4 | 0.5467   | 0.475  | 1.0243 | 1.069  | 0.0055 | 76.22 |
| 1  | 75167915  | rs12129191 | A | G | 4 | 0.4911   | 0.4752 | 0.9733 | 0.9337 | 0.0026 | 78.88 |
| 8  | 135214566 | rs6994801  | C | G | 4 | 0.0174   | 0.4754 | 0.9211 | 0.9475 | 0.0108 | 73.18 |
| 8  | 135212703 | rs4897681  | C | T | 4 | 0.01746  | 0.4758 | 1.0855 | 1.0555 | 0.0104 | 73.34 |
| 10 | 110707237 | rs17778715 | C | T | 4 | 0.03052  | 0.4763 | 0.9063 | 0.9431 | 0.0509 | 61.42 |
| 6  | 116136091 | rs9372449  | G | C | 3 | 0.01536  | 0.4767 | 1.1606 | 1.1351 | 0.0022 | 83.61 |
| 2  | 51625061  | rs1528817  | A | G | 4 | 0.02947  | 0.4768 | 0.9275 | 0.9514 | 0.0223 | 68.74 |
| 22 | 33870650  | rs9610223  | C | T | 4 | 0.05452  | 0.4769 | 0.9248 | 0.9339 | 0.0042 | 77.33 |
| 2  | 51626312  | rs2698031  | A | G | 4 | 0.02834  | 0.477  | 0.927  | 0.9512 | 0.0213 | 69.07 |
| 12 | 97094459  | rs1354486  | A | G | 4 | 0.6219   | 0.4772 | 1.0203 | 0.9303 | 0.0023 | 79.36 |
| 5  | 178226479 | rs11948690 | C | G | 4 | 0.3698   | 0.4775 | 0.9521 | 0.8969 | 0.0002 | 84.43 |
| 13 | 84157238  | rs9319065  | A | G | 4 | 0.7254   | 0.4776 | 0.9815 | 0.9129 | 0.0022 | 79.5  |
| 2  | 172379340 | rs7586207  | A | G | 4 | 0.3226   | 0.4778 | 0.9627 | 0.9309 | 0.0009 | 81.81 |
| 14 | 77999119  | rs11625200 | A | C | 4 | 0.3339   | 0.478  | 1.0354 | 1.06   | 0.0072 | 75.12 |
| 6  | 121698543 | rs9320809  | A | G | 4 | 0.009762 | 0.4781 | 0.8886 | 0.9414 | 0.0469 | 62.3  |
| 1  | 199367371 | rs11589642 | A | G | 4 | 0.3166   | 0.4782 | 1.0438 | 1.078  | 0.0024 | 79.15 |
| 16 | 47669016  | rs2967255  | A | C | 4 | 0.03756  | 0.4783 | 0.9284 | 0.9495 | 0.0219 | 68.88 |
| 10 | 110729755 | rs10509885 | C | T | 4 | 0.03057  | 0.4784 | 1.1034 | 1.0602 | 0.051  | 61.39 |
| 14 | 32679948  | rs8013167  | A | G | 4 | 0.07291  | 0.4786 | 1.0725 | 1.0579 | 0.0211 | 69.12 |

|    |           |            |   |   |   |         |        |        |        |        |       |
|----|-----------|------------|---|---|---|---------|--------|--------|--------|--------|-------|
| 1  | 51248076  | rs3813634  | A | G | 4 | 0.08214 | 0.4788 | 0.9406 | 0.9482 | 0.0135 | 71.96 |
| 8  | 135092082 | rs11990927 | A | G | 4 | 0.07679 | 0.479  | 1.0633 | 1.0526 | 0.0177 | 70.29 |
| 5  | 178229382 | rs11958941 | C | T | 4 | 0.3509  | 0.4791 | 0.9506 | 0.8978 | 0.0002 | 84.43 |
| 16 | 47674551  | rs2908915  | C | T | 4 | 0.03697 | 0.4791 | 0.929  | 0.95   | 0.0202 | 69.42 |
| 6  | 94860568  | rs546226   | A | G | 4 | 0.01892 | 0.4796 | 0.9198 | 0.9546 | 0.0468 | 62.32 |
| 13 | 39474064  | rs12873354 | C | T | 4 | 0.4934  | 0.4797 | 0.9758 | 0.9365 | 0.0011 | 81.35 |
| 6  | 94860527  | rs546100   | A | C | 4 | 0.01865 | 0.4798 | 1.0874 | 1.0476 | 0.0462 | 62.46 |
| 5  | 104064571 | rs17416034 | C | T | 4 | 0.07673 | 0.48   | 0.9216 | 0.923  | 0.0022 | 79.43 |
| 7  | 52158227  | rs2465796  | C | T | 4 | 0.04989 | 0.48   | 1.071  | 1.0565 | 0.0092 | 73.98 |
| 16 | 47669641  | rs2967254  | C | T | 4 | 0.03854 | 0.4802 | 1.0767 | 1.0528 | 0.0225 | 68.68 |
| 5  | 178257390 | rs6895371  | C | T | 4 | 0.3312  | 0.4803 | 0.9496 | 0.8994 | 0.0002 | 84.43 |
| 8  | 135092194 | rs11998140 | A | C | 4 | 0.08507 | 0.4804 | 0.9415 | 0.9496 | 0.0171 | 70.54 |
| 3  | 113072462 | rs1282932  | A | C | 4 | 0.9153  | 0.4811 | 1.004  | 0.9369 | 0.0022 | 79.41 |
| 6  | 157077339 | rs6913743  | A | G | 4 | 0.02728 | 0.4813 | 0.8432 | 0.8937 | 0.0232 | 68.45 |
| 2  | 115868314 | rs17453131 | A | G | 4 | 0.8106  | 0.4818 | 0.9869 | 0.9171 | 0.0063 | 75.69 |
| 11 | 3638426   | rs10834744 | A | G | 4 | 0.03919 | 0.4818 | 0.9076 | 0.9422 | 0.0598 | 59.54 |
| 8  | 135219115 | rs7012406  | A | T | 4 | 0.03901 | 0.4819 | 0.9306 | 0.9517 | 0.0226 | 68.66 |
| 6  | 52591585  | rs9463804  | T | A | 3 | 0.04019 | 0.4823 | 1.3162 | 1.2773 | 0.0051 | 81.05 |
| 8  | 54356965  | rs2376420  | A | T | 4 | 0.02255 | 0.4823 | 0.8761 | 0.9134 | 0.0083 | 74.46 |
| 5  | 178239194 | rs6862829  | C | T | 4 | 0.3418  | 0.4824 | 0.9507 | 0.8996 | 0.0002 | 84.55 |
| 5  | 178239195 | rs6883566  | A | G | 4 | 0.3418  | 0.4824 | 0.9507 | 0.8996 | 0.0002 | 84.55 |
| 5  | 178253452 | rs11954382 | C | T | 4 | 0.3353  | 0.4824 | 0.9501 | 0.8997 | 0.0002 | 84.49 |
| 7  | 121757354 | rs920802   | A | G | 4 | 0.01393 | 0.4824 | 0.9127 | 0.9497 | 0.0267 | 67.4  |
| 16 | 6838963   | rs8054809  | C | G | 4 | 0.03317 | 0.483  | 1.0848 | 1.0685 | 0.0024 | 79.14 |
| 10 | 36634477  | rs4934805  | A | G | 4 | 0.4213  | 0.4831 | 1.0494 | 1.1009 | 0.0061 | 75.86 |
| 11 | 13470839  | rs6254     | C | T | 4 | 0.9695  | 0.4831 | 1.0014 | 0.9413 | 0.0043 | 77.19 |
| 6  | 20964682  | rs4712556  | A | G | 4 | 0.7888  | 0.4833 | 1.0099 | 1.0598 | 0.0081 | 74.6  |
| 11 | 13531228  | rs1903102  | A | C | 4 | 0.9535  | 0.4834 | 1.0021 | 1.0611 | 0.0053 | 76.41 |
| 1  | 81205753  | rs7537835  | A | G | 4 | 0.0184  | 0.4836 | 1.0888 | 1.0534 | 0.0203 | 69.4  |
| 5  | 178232797 | rs6870926  | C | T | 4 | 0.348   | 0.4838 | 1.0512 | 1.1113 | 0.0002 | 84.55 |
| 5  | 178229129 | rs11949892 | C | T | 4 | 0.3668  | 0.4839 | 1.0503 | 1.1134 | 0.0002 | 84.63 |
| 22 | 23850095  | rs5752064  | C | T | 4 | 0.6137  | 0.4839 | 0.981  | 0.9423 | 0.0081 | 74.58 |
| 5  | 178229142 | rs11949180 | A | G | 4 | 0.3674  | 0.484  | 0.9522 | 0.8982 | 0.0002 | 84.63 |
| 6  | 136516487 | rs9494457  | A | T | 4 | 0.599   | 0.4842 | 1.019  | 1.0694 | 0.0007 | 82.35 |
| 10 | 110724687 | rs4314990  | C | T | 4 | 0.03152 | 0.4846 | 0.9068 | 0.9439 | 0.0502 | 61.56 |
| 5  | 178227589 | rs11948175 | A | C | 4 | 0.3853  | 0.4848 | 0.9536 | 0.8981 | 0.0002 | 84.56 |
| 10 | 110722721 | rs11596823 | A | G | 4 | 0.03143 | 0.4849 | 1.1028 | 1.0594 | 0.05   | 61.61 |

|    |           |            |   |   |   |          |        |        |        |        |       |
|----|-----------|------------|---|---|---|----------|--------|--------|--------|--------|-------|
| 10 | 110723326 | rs17779320 | A | G | 4 | 0.03143  | 0.4849 | 1.1028 | 1.0594 | 0.05   | 61.61 |
| 4  | 58802595  | rs2553316  | C | G | 4 | 0.01156  | 0.4851 | 1.1009 | 1.0605 | 0.009  | 74.07 |
| 8  | 12887282  | rs13281642 | A | T | 4 | 0.002589 | 0.4853 | 1.2486 | 1.117  | 0.0102 | 73.45 |
| 6  | 33235965  | rs4713614  | A | C | 4 | 0.0859   | 0.4854 | 0.9401 | 0.9509 | 0.0243 | 68.12 |
| 10 | 110707994 | rs17700585 | C | T | 4 | 0.03066  | 0.4854 | 1.1033 | 1.0594 | 0.0495 | 61.73 |
| 10 | 122674538 | rs11199656 | C | T | 4 | 0.2791   | 0.4866 | 1.1058 | 1.1627 | 0.0057 | 76.12 |
| 6  | 52589637  | rs9474257  | G | T | 3 | 0.04217  | 0.4867 | 1.3127 | 1.275  | 0.005  | 81.16 |
| 16 | 7375088   | rs7184072  | C | T | 4 | 0.01422  | 0.4873 | 1.1595 | 1.084  | 0.0365 | 64.76 |
| 3  | 113073512 | rs1282931  | A | T | 4 | 0.8927   | 0.4877 | 0.995  | 1.0673 | 0.0018 | 80.02 |
| 11 | 13516530  | rs11608098 | C | T | 4 | 0.9791   | 0.4879 | 1.001  | 1.0606 | 0.0053 | 76.39 |
| 5  | 104073920 | rs325524   | C | G | 4 | 0.08364  | 0.4881 | 1.0835 | 1.0815 | 0.0024 | 79.23 |
| 5  | 104081546 | rs325538   | A | G | 4 | 0.05901  | 0.4882 | 0.9158 | 0.9192 | 0.0008 | 81.96 |
| 15 | 89915807  | rs7174086  | C | G | 4 | 0.3129   | 0.4883 | 0.9618 | 0.937  | 0.0027 | 78.85 |
| 8  | 135164118 | rs6981423  | C | T | 4 | 0.07501  | 0.4884 | 1.0641 | 1.0497 | 0.0246 | 68.03 |
| 2  | 51634538  | rs2715079  | A | G | 4 | 0.02955  | 0.4887 | 1.0789 | 1.0532 | 0.0131 | 72.11 |
| 3  | 56421736  | rs931461   | G | T | 4 | 0.7279   | 0.4887 | 0.9874 | 1.0643 | 0.0025 | 79.01 |
| 5  | 104016997 | rs6859797  | A | C | 4 | 0.06995  | 0.4888 | 1.0895 | 1.0839 | 0.0021 | 79.64 |
| 10 | 30332299  | rs12779954 | A | T | 4 | 0.0674   | 0.4888 | 0.9363 | 0.9521 | 0.0285 | 66.9  |
| 2  | 51626897  | rs1358578  | A | G | 4 | 0.06823  | 0.4892 | 1.0658 | 1.0484 | 0.0296 | 66.59 |
| 2  | 51629318  | rs2715081  | C | T | 4 | 0.03091  | 0.4893 | 0.9274 | 0.9512 | 0.0177 | 70.31 |
| 5  | 178229183 | rs11958887 | C | T | 4 | 0.3783   | 0.4893 | 0.9532 | 0.8991 | 0.0002 | 84.7  |
| 5  | 104076454 | rs325527   | C | T | 4 | 0.07788  | 0.4894 | 0.9218 | 0.9236 | 0.0018 | 80.01 |
| 8  | 129318285 | rs16902754 | A | C | 4 | 0.4142   | 0.49   | 1.0725 | 1.1381 | 0.0079 | 74.71 |
| 2  | 172363343 | rs6758704  | C | T | 4 | 0.3574   | 0.4902 | 1.036  | 1.0723 | 0.0009 | 81.9  |
| 2  | 172304324 | rs6710698  | C | G | 4 | 0.4661   | 0.4905 | 1.0286 | 1.0735 | 0.0008 | 82.17 |
| 3  | 29734340  | rs17550007 | G | T | 4 | 0.5486   | 0.4907 | 0.9783 | 0.9445 | 0.0069 | 75.29 |
| 6  | 30245628  | rs1018846  | A | G | 4 | 0.01707  | 0.4909 | 1.1945 | 1.1142 | 0.0169 | 70.62 |
| 7  | 125587676 | rs593517   | A | C | 4 | 0.06335  | 0.4911 | 1.1036 | 1.0686 | 0.0488 | 61.87 |
| 3  | 113072652 | rs1913494  | A | G | 4 | 0.8748   | 0.4912 | 1.0059 | 0.9376 | 0.0019 | 79.89 |
| 7  | 125587627 | rs593446   | C | T | 4 | 0.06248  | 0.4912 | 1.1039 | 1.0688 | 0.048  | 62.06 |
| 6  | 136506453 | rs7770469  | A | G | 4 | 0.6854   | 0.4917 | 1.0149 | 1.0648 | 0.002  | 79.75 |
| 2  | 17289256  | rs1983375  | C | T | 4 | 0.925    | 0.4918 | 0.9954 | 0.9278 | 0.0096 | 73.78 |
| 2  | 29140696  | rs10495767 | A | G | 4 | 0.06786  | 0.4921 | 1.08   | 1.0548 | 0.0474 | 62.18 |
| 5  | 104080504 | rs325533   | A | G | 4 | 0.08266  | 0.4923 | 1.0835 | 1.0837 | 0.0015 | 80.61 |
| 5  | 104073206 | rs325522   | C | G | 4 | 0.08122  | 0.4925 | 1.0838 | 1.082  | 0.0018 | 79.98 |
| 14 | 39252820  | rs12147244 | A | G | 4 | 0.03142  | 0.4928 | 1.1323 | 1.0731 | 0.0619 | 59.12 |
| 2  | 134734676 | rs3791261  | G | T | 4 | 0.0281   | 0.4934 | 1.2171 | 1.1398 | 0.0207 | 69.26 |

|    |           |            |   |   |   |          |        |        |        |        |       |
|----|-----------|------------|---|---|---|----------|--------|--------|--------|--------|-------|
| 5  | 62562511  | rs347670   | C | T | 4 | 0.8218   | 0.4934 | 0.9875 | 0.9086 | 0.0023 | 79.31 |
| 2  | 60183809  | rs6726368  | C | G | 4 | 0.9947   | 0.4935 | 1.0003 | 1.0642 | 0.0042 | 77.25 |
| 20 | 39604287  | rs2866743  | A | G | 4 | 0.1618   | 0.4936 | 0.8337 | 0.805  | 0.0055 | 76.27 |
| 14 | 39253036  | rs10483520 | A | G | 4 | 0.0318   | 0.4937 | 1.132  | 1.0733 | 0.0604 | 59.42 |
| 10 | 30332480  | rs12780390 | C | T | 4 | 0.07301  | 0.4938 | 0.9376 | 0.9521 | 0.0255 | 67.76 |
| 10 | 32470365  | rs2998089  | G | T | 4 | 0.04543  | 0.4941 | 0.8241 | 0.8814 | 0.0359 | 64.9  |
| 5  | 104092841 | rs161785   | A | C | 4 | 0.09343  | 0.4946 | 0.9249 | 0.9229 | 0.0015 | 80.59 |
| 2  | 172443575 | rs6724337  | C | T | 4 | 0.3491   | 0.4949 | 0.9647 | 0.9333 | 0.0009 | 81.87 |
| 2  | 113545707 | rs4849147  | A | T | 4 | 0.02824  | 0.4952 | 1.0899 | 1.0605 | 0.0103 | 73.38 |
| 10 | 110687487 | rs11592721 | A | G | 4 | 0.03214  | 0.4954 | 0.9    | 0.9393 | 0.042  | 63.44 |
| 4  | 92549226  | rs4301075  | A | T | 4 | 0.5463   | 0.4955 | 0.9768 | 0.9408 | 0.0066 | 75.5  |
| 4  | 92515582  | rs1554850  | A | C | 4 | 0.699    | 0.496  | 1.0163 | 1.0697 | 0.0043 | 77.23 |
| 5  | 104072799 | rs12514766 | A | T | 4 | 0.08353  | 0.496  | 1.0831 | 1.0813 | 0.0018 | 80.02 |
| 3  | 56416017  | rs9817231  | A | T | 4 | 0.6972   | 0.4966 | 1.014  | 0.941  | 0.002  | 79.7  |
| 5  | 104076769 | rs106451   | A | C | 4 | 0.0824   | 0.4966 | 1.0835 | 1.082  | 0.0016 | 80.35 |
| 15 | 52090751  | rs1897042  | A | T | 4 | 0.8712   | 0.4966 | 0.9939 | 1.0656 | 0.0024 | 79.14 |
| 6  | 116136871 | rs9374567  | T | C | 3 | 0.01385  | 0.4968 | 1.1585 | 1.1286 | 0.0021 | 83.82 |
| 5  | 104093326 | rs161787   | C | T | 4 | 0.09532  | 0.4975 | 0.9254 | 0.9232 | 0.0014 | 80.69 |
| 1  | 48880413  | rs12058997 | C | T | 4 | 0.7262   | 0.4978 | 1.0222 | 1.0985 | 0.0082 | 74.55 |
| 7  | 125586751 | rs473762   | A | T | 4 | 0.06362  | 0.4981 | 1.1034 | 1.0677 | 0.0475 | 62.16 |
| 8  | 135092624 | rs1379440  | C | T | 4 | 0.08813  | 0.4985 | 1.0615 | 1.0521 | 0.0135 | 71.96 |
| 21 | 16544957  | rs238946   | A | G | 4 | 0.09625  | 0.4985 | 0.9396 | 0.9338 | 0.0006 | 82.82 |
| 20 | 55497673  | rs6099656  | C | T | 4 | 0.05536  | 0.4988 | 0.9318 | 0.9527 | 0.0317 | 66.02 |
| 2  | 172371640 | rs6754817  | C | T | 4 | 0.3797   | 0.4994 | 0.9668 | 0.9332 | 0.0007 | 82.32 |
| 5  | 104074988 | rs325526   | A | G | 4 | 0.0833   | 0.4995 | 0.9232 | 0.9248 | 0.0016 | 80.3  |
| 9  | 82311365  | rs11138705 | C | G | 4 | 0.01825  | 0.4995 | 0.9042 | 0.9472 | 0.0432 | 63.15 |
| 2  | 172398426 | rs908670   | C | T | 4 | 0.3378   | 0.4997 | 1.0375 | 1.0718 | 0.0007 | 82.49 |
| 6  | 52612989  | rs1884456  | A | G | 3 | 0.05879  | 0.4998 | 1.2863 | 1.2695 | 0.0042 | 81.75 |
| 2  | 51632112  | rs11563162 | A | G | 4 | 0.03248  | 0.5003 | 1.082  | 1.0524 | 0.0178 | 70.27 |
| 8  | 135192071 | rs1124525  | A | G | 4 | 0.02454  | 0.5003 | 0.9246 | 0.9493 | 0.0094 | 73.89 |
| 5  | 104095776 | rs161788   | C | T | 4 | 0.09764  | 0.5004 | 1.0801 | 1.0828 | 0.0014 | 80.77 |
| 11 | 13530401  | rs10500784 | A | C | 4 | 0.9935   | 0.5006 | 1.0003 | 0.9447 | 0.0052 | 76.47 |
| 2  | 172358072 | rs10167419 | A | G | 4 | 0.3818   | 0.5007 | 0.967  | 0.9336 | 0.0007 | 82.24 |
| 21 | 17228121  | rs2824148  | A | G | 4 | 0.007378 | 0.5011 | 1.1099 | 1.0529 | 0.0301 | 66.43 |
| 2  | 51622700  | rs1997326  | G | T | 4 | 0.06504  | 0.5015 | 0.936  | 0.9522 | 0.0211 | 69.13 |
| 4  | 92549378  | rs7672281  | A | C | 4 | 0.5452   | 0.5016 | 0.9767 | 0.9413 | 0.0063 | 75.68 |
| 7  | 44215353  | rs2908282  | A | G | 4 | 0.04651  | 0.5018 | 1.0956 | 1.0567 | 0.0614 | 59.21 |

|    |           |            |   |   |   |         |        |        |        |        |       |
|----|-----------|------------|---|---|---|---------|--------|--------|--------|--------|-------|
| 2  | 172355011 | rs7608403  | A | C | 4 | 0.3858  | 0.502  | 0.9673 | 0.9335 | 0.0007 | 82.4  |
| 11 | 86021251  | rs2155035  | A | G | 4 | 0.5056  | 0.503  | 1.0426 | 1.0949 | 0.0105 | 73.3  |
| 11 | 86018768  | rs10898515 | C | T | 4 | 0.5012  | 0.5031 | 0.9586 | 0.913  | 0.0104 | 73.36 |
| 5  | 104090924 | rs161456   | C | T | 4 | 0.09919 | 0.5032 | 0.9262 | 0.9238 | 0.0013 | 80.89 |
| 5  | 104091863 | rs161783   | C | T | 4 | 0.09919 | 0.5032 | 0.9262 | 0.9238 | 0.0013 | 80.89 |
| 7  | 52238030  | rs10250470 | A | G | 4 | 0.03225 | 0.5032 | 0.9226 | 0.9542 | 0.0449 | 62.76 |
| 5  | 104093239 | rs161786   | C | T | 4 | 0.09962 | 0.5034 | 1.0796 | 1.0824 | 0.0013 | 80.87 |
| 8  | 135216479 | rs992526   | C | T | 4 | 0.02154 | 0.5034 | 0.9242 | 0.9499 | 0.0085 | 74.34 |
| 2  | 172412537 | rs4668414  | A | C | 4 | 0.3717  | 0.504  | 0.9663 | 0.9342 | 0.0008 | 82.15 |
| 5  | 104090937 | rs161457   | C | T | 4 | 0.09995 | 0.5041 | 1.0795 | 1.0822 | 0.0013 | 80.86 |
| 5  | 104091358 | rs161782   | A | G | 4 | 0.09995 | 0.5041 | 1.0795 | 1.0822 | 0.0013 | 80.86 |
| 2  | 134734535 | rs3791259  | C | T | 4 | 0.0218  | 0.5042 | 0.818  | 0.8752 | 0.0133 | 72.05 |
| 10 | 110717700 | rs17779136 | C | T | 4 | 0.03347 | 0.5048 | 0.9079 | 0.946  | 0.0468 | 62.31 |
| 13 | 89055707  | rs7994475  | A | G | 4 | 0.504   | 0.5052 | 1.0853 | 1.2112 | 0.0022 | 79.45 |
| 3  | 56416159  | rs11130520 | G | T | 4 | 0.6658  | 0.5055 | 0.9847 | 1.0618 | 0.0018 | 79.98 |
| 3  | 56418235  | rs6445788  | C | G | 4 | 0.6029  | 0.5055 | 0.9813 | 1.0631 | 0.0017 | 80.19 |
| 7  | 125587892 | rs526981   | C | T | 4 | 0.06741 | 0.5056 | 1.1019 | 1.0667 | 0.046  | 62.5  |
| 15 | 91523799  | rs17539990 | C | G | 3 | 0.7869  | 0.5056 | 0.9861 | 0.8982 | 0.0019 | 84.11 |
| 21 | 40141997  | rs2837249  | A | G | 4 | 0.08568 | 0.5057 | 1.0675 | 1.0528 | 0.0211 | 69.12 |
| 4  | 57460303  | rs4865165  | C | T | 4 | 0.0525  | 0.5059 | 1.0694 | 1.0454 | 0.0335 | 65.53 |
| 2  | 172398511 | rs908671   | C | G | 4 | 0.3498  | 0.5061 | 0.9647 | 0.9335 | 0.0006 | 82.75 |
| 3  | 56415469  | rs6763636  | G | T | 4 | 0.6638  | 0.5063 | 0.9846 | 1.0615 | 0.0019 | 79.88 |
| 5  | 104087924 | rs325565   | G | T | 4 | 0.09119 | 0.5063 | 1.0812 | 1.082  | 0.0012 | 81.14 |
| 1  | 48878877  | rs7535727  | G | T | 4 | 0.7618  | 0.5068 | 0.9813 | 0.912  | 0.0077 | 74.8  |
| 6  | 136507734 | rs1600620  | A | T | 4 | 0.7212  | 0.5068 | 0.9874 | 0.9391 | 0.0008 | 82.05 |
| 4  | 92557826  | rs2091765  | A | G | 4 | 0.587   | 0.5073 | 0.9789 | 0.9418 | 0.0062 | 75.73 |
| 6  | 136507868 | rs1600619  | A | T | 4 | 0.7101  | 0.5074 | 1.0133 | 1.0652 | 0.0007 | 82.31 |
| 8  | 135205190 | rs765847   | A | G | 4 | 0.0258  | 0.5074 | 1.0808 | 1.0527 | 0.0088 | 74.2  |
| 12 | 97093097  | rs1504558  | C | G | 4 | 0.3765  | 0.5075 | 0.9665 | 1.0708 | 0.0008 | 81.97 |
| 2  | 172417165 | rs3770445  | C | T | 4 | 0.3518  | 0.5076 | 1.0364 | 1.0706 | 0.0006 | 82.54 |
| 14 | 78012231  | rs10431730 | A | G | 4 | 0.3828  | 0.5078 | 0.9688 | 0.9454 | 0.0055 | 76.28 |
| 4  | 21477856  | rs2063658  | A | T | 4 | 0.7696  | 0.5085 | 0.9896 | 0.9375 | 0.0005 | 83.1  |
| 7  | 9678156   | rs6973468  | G | T | 4 | 0.05025 | 0.5086 | 1.0927 | 1.0663 | 0.0131 | 72.1  |
| 14 | 78016834  | rs1990531  | A | G | 4 | 0.4251  | 0.5087 | 1.0291 | 1.0591 | 0.0036 | 77.86 |
| 21 | 40139786  | rs9982859  | C | T | 4 | 0.08585 | 0.5088 | 1.0674 | 1.0521 | 0.0218 | 68.9  |
| 8  | 12906017  | rs13252623 | G | T | 4 | 0.0034  | 0.5089 | 1.2447 | 1.1134 | 0.0087 | 74.26 |
| 4  | 171427766 | rs2030549  | A | T | 4 | 0.02425 | 0.509  | 0.7818 | 0.862  | 0.0277 | 67.11 |

|    |           |            |   |   |   |          |        |        |        |        |       |
|----|-----------|------------|---|---|---|----------|--------|--------|--------|--------|-------|
| 1  | 65081975  | rs4916005  | C | T | 4 | 0.07889  | 0.5093 | 0.913  | 0.926  | 0.007  | 75.25 |
| 1  | 51252846  | rs7555006  | A | G | 4 | 0.04457  | 0.5094 | 1.0769 | 1.0535 | 0.012  | 72.58 |
| 5  | 104119377 | rs161776   | C | G | 4 | 0.1032   | 0.5097 | 1.0795 | 1.081  | 0.0016 | 80.34 |
| 8  | 12897996  | rs12375378 | A | C | 4 | 0.003632 | 0.5097 | 1.24   | 1.1108 | 0.0099 | 73.6  |
| 10 | 32469248  | rs3006662  | A | C | 4 | 0.04317  | 0.5098 | 1.2164 | 1.1301 | 0.0349 | 65.17 |
| 5  | 104118535 | rs325492   | C | T | 4 | 0.1029   | 0.5099 | 0.9263 | 0.9251 | 0.0016 | 80.35 |
| 5  | 104077349 | rs325530   | G | T | 4 | 0.09045  | 0.5103 | 0.9248 | 0.9255 | 0.0013 | 80.9  |
| 5  | 104077611 | rs325531   | A | G | 4 | 0.09045  | 0.5103 | 0.9248 | 0.9255 | 0.0013 | 80.9  |
| 5  | 104077750 | rs325532   | C | T | 4 | 0.09082  | 0.5105 | 1.0812 | 1.0804 | 0.0013 | 80.88 |
| 6  | 136506228 | rs7748159  | G | T | 4 | 0.7251   | 0.5107 | 1.0126 | 1.0643 | 0.0008 | 82.06 |
| 21 | 37142961  | rs17192962 | A | G | 4 | 0.793    | 0.5109 | 0.9776 | 0.8804 | 0.0071 | 75.2  |
| 2  | 115870472 | rs13022199 | A | G | 4 | 0.8574   | 0.511  | 1.0099 | 1.0839 | 0.0061 | 75.81 |
| 2  | 184952504 | rs13036001 | C | T | 4 | 0.05351  | 0.5114 | 1.0946 | 1.057  | 0.0508 | 61.44 |
| 6  | 136508312 | rs12662330 | A | C | 4 | 0.7267   | 0.5116 | 0.9876 | 0.9392 | 0.0007 | 82.41 |
| 2  | 51618222  | rs3915321  | C | T | 4 | 0.06664  | 0.5124 | 0.9343 | 0.95   | 0.014  | 71.75 |
| 5  | 104119936 | rs161777   | C | T | 4 | 0.1052   | 0.5126 | 1.079  | 1.0806 | 0.0016 | 80.44 |
| 2  | 51618920  | rs2354378  | C | T | 4 | 0.0688   | 0.513  | 0.9348 | 0.9503 | 0.0146 | 71.48 |
| 6  | 136507265 | rs4896199  | A | C | 4 | 0.7354   | 0.5131 | 0.988  | 0.94   | 0.0008 | 82    |
| 4  | 57460809  | rs9998008  | A | G | 4 | 0.05501  | 0.5132 | 1.0687 | 1.0448 | 0.0323 | 65.84 |
| 2  | 51618512  | rs3915322  | A | G | 4 | 0.06824  | 0.5133 | 1.0699 | 1.0524 | 0.0144 | 71.56 |
| 3  | 56416835  | rs9880091  | C | T | 4 | 0.6173   | 0.5133 | 0.9821 | 1.061  | 0.0021 | 79.63 |
| 7  | 52237378  | rs11238186 | A | C | 4 | 0.03263  | 0.5134 | 1.0837 | 1.0468 | 0.0446 | 62.82 |
| 5  | 104089373 | rs325569   | A | T | 4 | 0.09607  | 0.514  | 0.926  | 0.9249 | 0.001  | 81.46 |
| 5  | 104077128 | rs325529   | C | T | 4 | 0.09298  | 0.5141 | 1.0806 | 1.0799 | 0.0013 | 80.97 |
| 4  | 58794368  | rs2570089  | C | T | 4 | 0.009541 | 0.5147 | 1.1049 | 1.0591 | 0.0063 | 75.72 |
| 5  | 104088490 | rs325567   | C | T | 4 | 0.09664  | 0.5152 | 0.9261 | 0.9252 | 0.0011 | 81.43 |
| 12 | 51736002  | rs2364153  | C | T | 4 | 0.1417   | 0.5152 | 0.9476 | 0.9384 | 0.0017 | 80.15 |
| 6  | 30235852  | rs1318638  | C | T | 4 | 0.01902  | 0.5153 | 0.8402 | 0.9024 | 0.0155 | 71.15 |
| 10 | 110714051 | rs17779016 | A | G | 4 | 0.03809  | 0.5154 | 1.0989 | 1.0555 | 0.0477 | 62.11 |
| 13 | 89054175  | rs9634611  | G | T | 4 | 0.5206   | 0.5156 | 0.9241 | 0.8282 | 0.002  | 79.7  |
| 1  | 66960695  | rs11208951 | C | T | 4 | 0.07328  | 0.5157 | 0.9346 | 0.9548 | 0.0386 | 64.25 |
| 8  | 54357042  | rs2376419  | A | G | 4 | 0.02546  | 0.5159 | 0.8784 | 0.9191 | 0.0077 | 74.78 |
| 6  | 54711017  | rs4715472  | A | G | 4 | 0.08098  | 0.5162 | 0.9076 | 0.9337 | 0.0352 | 65.1  |
| 3  | 151314149 | rs9844449  | C | T | 4 | 0.7087   | 0.5163 | 0.9823 | 1.0776 | 0.004  | 77.51 |
| 21 | 40136888  | rs2837246  | C | T | 4 | 0.08425  | 0.5165 | 1.0677 | 1.0521 | 0.0186 | 69.98 |
| 10 | 36637209  | rs12571128 | A | G | 4 | 0.4784   | 0.5169 | 0.9583 | 0.9139 | 0.0056 | 76.19 |
| 6  | 121702869 | rs9398632  | A | C | 4 | 0.01233  | 0.517  | 0.8919 | 0.9457 | 0.0431 | 63.16 |

|    |           |            |   |   |   |          |        |        |        |        |       |
|----|-----------|------------|---|---|---|----------|--------|--------|--------|--------|-------|
| 21 | 37142296  | rs8134687  | C | T | 4 | 0.806    | 0.5172 | 1.0213 | 1.1329 | 0.0072 | 75.12 |
| 5  | 104115918 | rs17351308 | A | G | 4 | 0.1098   | 0.5174 | 1.0779 | 1.08   | 0.0014 | 80.66 |
| 9  | 7514847   | rs10124892 | C | T | 4 | 0.07871  | 0.5175 | 1.0635 | 1.046  | 0.028  | 67.02 |
| 5  | 104086941 | rs325563   | A | G | 4 | 0.09876  | 0.5177 | 1.0793 | 1.0806 | 0.001  | 81.53 |
| 4  | 65093689  | rs4434285  | A | T | 4 | 0.03962  | 0.5181 | 0.9124 | 0.9451 | 0.0304 | 66.35 |
| 5  | 104087577 | rs325564   | C | G | 4 | 0.09858  | 0.5181 | 0.9265 | 0.9255 | 0.001  | 81.53 |
| 5  | 104015822 | rs12522864 | A | G | 4 | 0.09572  | 0.5184 | 0.9264 | 0.9306 | 0.0026 | 78.94 |
| 5  | 104090901 | rs12520736 | C | T | 4 | 0.1103   | 0.5184 | 1.0771 | 1.0804 | 0.0011 | 81.35 |
| 13 | 89086817  | rs9560407  | A | G | 4 | 0.4743   | 0.5184 | 0.916  | 0.8269 | 0.0016 | 80.39 |
| 13 | 72776677  | rs9318155  | A | C | 4 | 0.01838  | 0.5185 | 1.0877 | 1.0456 | 0.0325 | 65.79 |
| 9  | 2690620   | rs1454629  | C | T | 4 | 0.7239   | 0.5191 | 1.0137 | 1.0576 | 0.0078 | 74.77 |
| 2  | 172397314 | rs6759575  | C | T | 4 | 0.3171   | 0.5193 | 0.9612 | 0.935  | 0.0008 | 82.13 |
| 21 | 37142992  | rs2835491  | G | T | 4 | 0.821    | 0.5196 | 1.0197 | 1.1334 | 0.0068 | 75.37 |
| 13 | 89050456  | rs12561049 | A | G | 4 | 0.5325   | 0.5197 | 1.08   | 1.2057 | 0.002  | 79.67 |
| 6  | 136507126 | rs4896198  | C | T | 4 | 0.7614   | 0.5198 | 1.0109 | 1.0631 | 0.0008 | 82.2  |
| 7  | 49031338  | rs10258925 | A | G | 4 | 0.5669   | 0.5202 | 1.0241 | 1.0655 | 0.0036 | 77.82 |
| 1  | 51249676  | rs12092511 | A | G | 4 | 0.09512  | 0.5203 | 0.9429 | 0.9523 | 0.0122 | 72.52 |
| 8  | 135087684 | rs1379435  | C | T | 4 | 0.1041   | 0.5204 | 1.0585 | 1.0495 | 0.013  | 72.16 |
| 3  | 56410015  | rs9851360  | C | T | 4 | 0.6172   | 0.5206 | 1.0179 | 0.9435 | 0.0016 | 80.32 |
| 6  | 30236421  | rs12212092 | C | T | 4 | 0.01963  | 0.5207 | 0.841  | 0.9033 | 0.0151 | 71.29 |
| 19 | 61182755  | rs11084419 | C | T | 4 | 0.9227   | 0.5207 | 1.0046 | 1.0854 | 0.0011 | 81.41 |
| 3  | 176307233 | rs4894477  | A | G | 4 | 0.6722   | 0.5211 | 1.0158 | 1.0587 | 0.0032 | 78.21 |
| 10 | 124863434 | rs17104653 | C | G | 4 | 0.07622  | 0.5212 | 1.1726 | 1.1235 | 0.0191 | 69.83 |
| 6  | 124523218 | rs802272   | C | T | 4 | 0.0142   | 0.5213 | 1.1392 | 1.066  | 0.036  | 64.9  |
| 2  | 38369932  | rs13417898 | C | T | 4 | 0.4222   | 0.522  | 0.9712 | 0.9466 | 0.0047 | 76.85 |
| 3  | 56410435  | rs1546060  | A | C | 4 | 0.5947   | 0.5224 | 1.0191 | 0.9436 | 0.0016 | 80.36 |
| 3  | 56411201  | rs1491158  | A | G | 4 | 0.6284   | 0.523  | 0.9829 | 1.0593 | 0.0017 | 80.15 |
| 3  | 56412896  | rs11130518 | C | T | 4 | 0.6216   | 0.5239 | 0.9826 | 1.0591 | 0.0018 | 80.07 |
| 8  | 54357197  | rs4565474  | A | G | 4 | 0.0252   | 0.524  | 1.138  | 1.0866 | 0.0071 | 75.17 |
| 2  | 197778099 | rs2712900  | C | T | 4 | 0.1318   | 0.5241 | 0.8623 | 0.8553 | 0.0033 | 78.15 |
| 12 | 87460779  | rs1492348  | A | G | 3 | 0.003257 | 0.5248 | 0.7368 | 0.8641 | 0.0426 | 68.31 |
| 18 | 20409134  | rs12960420 | C | T | 4 | 0.6867   | 0.5255 | 0.9851 | 1.0621 | 0.0017 | 80.24 |
| 3  | 56410482  | rs1546061  | C | G | 4 | 0.6184   | 0.5258 | 0.9824 | 1.0586 | 0.0019 | 79.91 |
| 13 | 89081759  | rs994066   | C | G | 4 | 0.5296   | 0.5261 | 1.0792 | 1.2041 | 0.0015 | 80.61 |
| 3  | 56414093  | rs6805882  | C | T | 4 | 0.6067   | 0.5267 | 0.9818 | 1.059  | 0.0016 | 80.29 |
| 6  | 136513400 | rs1471545  | C | T | 4 | 0.7607   | 0.5277 | 1.0108 | 1.0621 | 0.0006 | 82.65 |
| 2  | 51625919  | rs13001767 | G | T | 4 | 0.03305  | 0.5281 | 0.9277 | 0.9533 | 0.0123 | 72.45 |



|    |           |            |   |   |   |          |        |        |        |        |       |
|----|-----------|------------|---|---|---|----------|--------|--------|--------|--------|-------|
| 5  | 104014181 | rs1120480  | C | T | 4 | 0.06883  | 0.5284 | 0.9173 | 0.9317 | 0.0034 | 78.01 |
| 4  | 72354222  | rs1840086  | A | G | 4 | 0.4404   | 0.5291 | 1.0396 | 1.0813 | 0.0024 | 79.13 |
| 15 | 58974308  | rs729978   | C | T | 4 | 0.06926  | 0.5291 | 0.9307 | 0.9315 | 0.0002 | 84.55 |
| 6  | 52599645  | rs9474262  | C | T | 3 | 0.0521   | 0.5296 | 1.2948 | 1.2618 | 0.0023 | 83.49 |
| 11 | 118009952 | rs633683   | C | T | 4 | 0.04916  | 0.5296 | 0.9313 | 0.9576 | 0.0357 | 64.95 |
| 6  | 136514132 | rs4896201  | A | G | 4 | 0.753    | 0.5297 | 1.0112 | 1.0596 | 0.0011 | 81.3  |
| 21 | 25543181  | rs17000817 | C | T | 4 | 0.1782   | 0.5299 | 1.1533 | 1.1775 | 0.0034 | 78.03 |
| 3  | 29736947  | rs6779932  | G | T | 4 | 0.6518   | 0.5301 | 0.9837 | 0.9493 | 0.0069 | 75.29 |
| 8  | 54357083  | rs2376418  | A | T | 4 | 0.02567  | 0.5305 | 1.1382 | 1.0857 | 0.007  | 75.26 |
| 21 | 32930403  | rs2833927  | C | T | 4 | 0.06114  | 0.5305 | 1.2009 | 1.1209 | 0.0409 | 63.68 |
| 21 | 40136828  | rs12627540 | A | C | 4 | 0.09168  | 0.5305 | 1.0662 | 1.0508 | 0.0174 | 70.43 |
| 6  | 136514189 | rs4896202  | G | T | 4 | 0.7422   | 0.5306 | 1.0117 | 1.0621 | 0.0005 | 82.9  |
| 10 | 110624642 | rs10884688 | A | G | 4 | 0.05251  | 0.5308 | 1.0922 | 1.0529 | 0.0516 | 61.26 |
| 4  | 15282435  | rs11723554 | C | G | 4 | 0.05504  | 0.531  | 0.8926 | 0.9178 | 0.0056 | 76.21 |
| 1  | 48006804  | rs12038866 | C | G | 4 | 0.1297   | 0.5312 | 1.0559 | 1.054  | 0.005  | 76.62 |
| 4  | 58784187  | rs2570071  | G | T | 4 | 0.01116  | 0.5312 | 1.1026 | 1.0573 | 0.0056 | 76.2  |
| 5  | 104007471 | rs11242529 | C | T | 4 | 0.1015   | 0.5313 | 1.0781 | 1.0724 | 0.0025 | 78.99 |
| 6  | 52600553  | rs9474264  | A | T | 3 | 0.06528  | 0.5314 | 1.2808 | 1.2518 | 0.0037 | 82.17 |
| 4  | 92541356  | rs12648320 | A | C | 4 | 0.7346   | 0.5315 | 1.0131 | 1.0591 | 0.0044 | 77.16 |
| 8  | 54411642  | rs7819906  | C | T | 4 | 0.02535  | 0.5316 | 1.1333 | 1.086  | 0.0046 | 76.93 |
| 7  | 48944124  | rs2215361  | A | G | 4 | 0.4917   | 0.5322 | 0.9728 | 0.9429 | 0.0046 | 76.98 |
| 2  | 51620902  | rs11680441 | A | G | 4 | 0.08158  | 0.5325 | 1.0665 | 1.0498 | 0.0142 | 71.64 |
| 8  | 14903851  | rs7005262  | A | G | 4 | 0.07418  | 0.5331 | 1.065  | 1.0422 | 0.0408 | 63.71 |
| 18 | 20409016  | rs12185417 | A | C | 4 | 0.6647   | 0.5334 | 1.0166 | 0.9406 | 0.0012 | 81.03 |
| 5  | 104101159 | rs161791   | G | T | 4 | 0.1015   | 0.5335 | 1.0793 | 1.0767 | 0.0013 | 80.85 |
| 7  | 124677258 | rs7776954  | A | G | 4 | 0.5748   | 0.5342 | 0.9767 | 0.9414 | 0.0051 | 76.52 |
| 8  | 97177903  | rs542253   | A | G | 4 | 0.9111   | 0.5344 | 1.0093 | 1.1521 | 0.0003 | 83.96 |
| 7  | 125578124 | rs635680   | C | G | 4 | 0.06836  | 0.5351 | 0.9078 | 0.9393 | 0.0348 | 65.19 |
| 15 | 58974360  | rs729977   | C | T | 4 | 0.07185  | 0.5352 | 1.0732 | 1.0716 | 0.0002 | 84.38 |
| 11 | 86016483  | rs12289252 | G | T | 4 | 0.6048   | 0.5356 | 0.9682 | 0.9193 | 0.0098 | 73.65 |
| 21 | 17230025  | rs11701807 | C | T | 4 | 0.006057 | 0.536  | 1.1178 | 1.0524 | 0.0225 | 68.69 |
| 4  | 13322444  | rs13147974 | C | G | 4 | 0.4047   | 0.5371 | 1.0307 | 1.0553 | 0.0037 | 77.76 |
| 13 | 39493139  | rs9603660  | C | T | 4 | 0.5818   | 0.5373 | 0.9807 | 0.9506 | 0.0053 | 76.43 |
| 8  | 135087435 | rs2896732  | A | C | 4 | 0.1078   | 0.5374 | 1.0579 | 1.0473 | 0.0134 | 71.97 |
| 4  | 15281298  | rs10516289 | C | T | 4 | 0.05966  | 0.538  | 0.8945 | 0.9188 | 0.0053 | 76.42 |
| 1  | 48870913  | rs7516699  | A | G | 4 | 0.85     | 0.5384 | 0.9883 | 0.9176 | 0.0071 | 75.15 |
| 5  | 104001831 | rs12514247 | C | T | 4 | 0.1122   | 0.5385 | 1.0752 | 1.0713 | 0.0023 | 79.29 |

|    |           |            |   |   |   |          |        |        |        |        |       |
|----|-----------|------------|---|---|---|----------|--------|--------|--------|--------|-------|
| 7  | 125583266 | rs489655   | A | G | 4 | 0.07256  | 0.5385 | 1.1001 | 1.0636 | 0.0374 | 64.55 |
| 5  | 104004713 | rs17156764 | A | C | 4 | 0.1063   | 0.539  | 1.0769 | 1.0713 | 0.0024 | 79.17 |
| 11 | 115308412 | rs369845   | C | T | 4 | 0.04522  | 0.5392 | 1.0805 | 1.0526 | 0.0126 | 72.32 |
| 5  | 104100998 | rs161790   | C | T | 4 | 0.1061   | 0.5394 | 0.9275 | 0.9294 | 0.0012 | 81.03 |
| 5  | 40304970  | rs11950581 | A | G | 4 | 0.008013 | 0.5399 | 0.9035 | 0.9529 | 0.0191 | 69.82 |
| 5  | 104090005 | rs325571   | A | G | 4 | 0.09158  | 0.5407 | 1.0821 | 1.0773 | 0.0009 | 81.73 |
| 6  | 26816186  | rs12195114 | A | G | 4 | 0.8865   | 0.5409 | 0.9944 | 0.9453 | 0.0049 | 76.73 |
| 21 | 17229575  | rs2824149  | C | T | 4 | 0.01063  | 0.5413 | 0.9053 | 0.9538 | 0.0279 | 67.07 |
| 5  | 62568648  | rs346423   | G | A | 3 | 0.3978   | 0.5416 | 0.9405 | 0.8603 | 0.001  | 85.5  |
| 3  | 176309283 | rs11710345 | A | G | 4 | 0.66     | 0.5419 | 1.0155 | 1.0594 | 0.0006 | 82.75 |
| 7  | 125577694 | rs498875   | C | T | 4 | 0.06896  | 0.5419 | 0.908  | 0.9398 | 0.0327 | 65.74 |
| 8  | 4081661   | rs17069679 | A | G | 4 | 0.3611   | 0.5419 | 1.0835 | 1.1572 | 0.0003 | 83.82 |
| 6  | 26817570  | rs9467847  | C | T | 4 | 0.8887   | 0.5421 | 1.0055 | 1.0576 | 0.005  | 76.66 |
| 13 | 39454803  | rs7322623  | A | C | 4 | 0.7321   | 0.543  | 1.0126 | 1.0587 | 0.0012 | 81.09 |
| 6  | 51918458  | rs12194995 | C | T | 4 | 0.05488  | 0.5437 | 0.9195 | 0.9484 | 0.0233 | 68.42 |
| 12 | 87293154  | rs10777110 | A | G | 4 | 0.08702  | 0.5437 | 1.1173 | 1.0938 | 0.0062 | 75.77 |
| 6  | 136513493 | rs1471546  | C | T | 4 | 0.839    | 0.5438 | 1.0071 | 1.0598 | 0.0005 | 82.9  |
| 3  | 144997632 | rs6807571  | A | G | 4 | 0.001419 | 0.5439 | 1.1654 | 1.0651 | 0.0134 | 71.97 |
| 2  | 210413152 | rs10178431 | G | T | 4 | 0.001927 | 0.5442 | 0.8436 | 0.9284 | 0.0094 | 73.86 |
| 13 | 89090502  | rs9555925  | C | T | 4 | 0.5543   | 0.5444 | 1.0746 | 1.1974 | 0.0012 | 81.05 |
| 2  | 150391583 | rs9288698  | T | G | 3 | 0.4458   | 0.5446 | 1.0401 | 1.0997 | 0.0021 | 83.79 |
| 2  | 51622443  | rs2950945  | A | G | 4 | 0.08896  | 0.5451 | 1.0619 | 1.0442 | 0.0223 | 68.75 |
| 7  | 125579026 | rs650045   | A | G | 4 | 0.07174  | 0.5453 | 0.9089 | 0.9404 | 0.0332 | 65.6  |
| 5  | 73287077  | rs283616   | C | G | 4 | 0.02024  | 0.546  | 0.9202 | 0.9408 | 0.0003 | 83.84 |
| 7  | 49098405  | rs7796330  | C | T | 4 | 0.5921   | 0.546  | 0.9777 | 0.9404 | 0.0031 | 78.35 |
| 2  | 51617864  | rs17864534 | C | T | 4 | 0.09255  | 0.5463 | 1.0633 | 1.0469 | 0.0169 | 70.6  |
| 5  | 73286248  | rs283612   | C | T | 4 | 0.01848  | 0.5463 | 0.9191 | 0.9407 | 0.0003 | 83.92 |
| 7  | 49039292  | rs12718319 | C | T | 4 | 0.5573   | 0.5463 | 0.9759 | 0.9433 | 0.0047 | 76.85 |
| 18 | 20409841  | rs1945153  | A | G | 4 | 0.6138   | 0.5463 | 0.9813 | 1.06   | 0.0013 | 80.94 |
| 7  | 125580265 | rs475294   | C | T | 4 | 0.07398  | 0.5467 | 1.0995 | 1.0628 | 0.0344 | 65.31 |
| 7  | 125580852 | rs501483   | A | G | 4 | 0.07398  | 0.5467 | 1.0995 | 1.0628 | 0.0344 | 65.31 |
| 7  | 125581531 | rs507803   | C | T | 4 | 0.07499  | 0.5467 | 1.0991 | 1.0627 | 0.035  | 65.14 |
| 7  | 125581817 | rs613484   | A | G | 4 | 0.076    | 0.5467 | 1.0987 | 1.0625 | 0.0357 | 64.97 |
| 7  | 125584379 | rs520807   | C | T | 4 | 0.08018  | 0.5468 | 1.0973 | 1.0619 | 0.0384 | 64.29 |
| 7  | 125581262 | rs505793   | C | T | 4 | 0.0737   | 0.547  | 0.9095 | 0.9409 | 0.0341 | 65.37 |
| 3  | 176311011 | rs4505709  | A | G | 4 | 0.6562   | 0.5475 | 1.0158 | 1.0591 | 0.0005 | 82.96 |
| 9  | 123780890 | rs13299260 | C | T | 4 | 0.2995   | 0.5475 | 1.0372 | 1.0589 | 0.0006 | 82.73 |

|    |           |            |   |   |   |          |        |        |        |        |       |
|----|-----------|------------|---|---|---|----------|--------|--------|--------|--------|-------|
| 2  | 38366026  | rs875653   | C | T | 4 | 0.7083   | 0.5479 | 0.9826 | 1.0761 | 0.0014 | 80.64 |
| 8  | 97181208  | rs546474   | A | G | 4 | 0.9086   | 0.5485 | 0.9906 | 0.8728 | 0.0003 | 84.04 |
| 7  | 125579381 | rs556478   | C | T | 4 | 0.07461  | 0.5487 | 0.9097 | 0.9411 | 0.0338 | 65.46 |
| 5  | 73286880  | rs283615   | A | T | 4 | 0.02044  | 0.549  | 0.9203 | 0.9411 | 0.0003 | 83.9  |
| 12 | 87291483  | rs10745479 | A | G | 4 | 0.09075  | 0.5497 | 0.8962 | 0.9152 | 0.006  | 75.89 |
| 15 | 58975113  | rs12592999 | A | G | 4 | 0.07648  | 0.5499 | 0.932  | 0.9348 | 0.0002 | 84.39 |
| 7  | 125579136 | rs553952   | C | T | 4 | 0.07417  | 0.55   | 1.0994 | 1.0626 | 0.0332 | 65.61 |
| 3  | 176306452 | rs17588879 | A | T | 4 | 0.6973   | 0.5501 | 1.0138 | 1.0605 | 0.0003 | 84.04 |
| 1  | 66953077  | rs1498354  | A | T | 4 | 0.08682  | 0.5502 | 1.0668 | 1.0441 | 0.0348 | 65.19 |
| 7  | 125584083 | rs518066   | C | T | 4 | 0.07931  | 0.5502 | 1.0976 | 1.0618 | 0.0364 | 64.78 |
| 1  | 107983470 | rs6693140  | C | T | 4 | 0.8015   | 0.5503 | 1.011  | 1.0705 | 0.001  | 81.65 |
| 15 | 86265806  | rs1836592  | A | T | 4 | 0.008642 | 0.5504 | 0.8895 | 0.9435 | 0.0094 | 73.87 |
| 7  | 125583763 | rs515267   | G | T | 4 | 0.07841  | 0.5505 | 0.9108 | 0.9417 | 0.0358 | 64.94 |
| 10 | 110614661 | rs11599840 | A | G | 4 | 0.05881  | 0.5506 | 0.9172 | 0.9516 | 0.0485 | 61.94 |
| 2  | 172434227 | rs12692978 | C | T | 4 | 0.328    | 0.5507 | 0.9619 | 0.9379 | 0.0006 | 82.79 |
| 3  | 176306392 | rs17588796 | A | G | 4 | 0.6986   | 0.5507 | 1.0137 | 1.0604 | 0.0003 | 84    |
| 3  | 176310488 | rs6782155  | A | G | 4 | 0.6712   | 0.5508 | 1.0149 | 1.0582 | 0.0005 | 82.92 |
| 6  | 26812951  | rs12202849 | A | G | 4 | 0.92     | 0.5509 | 1.0039 | 1.0564 | 0.0049 | 76.67 |
| 12 | 87297081  | rs4842604  | C | T | 4 | 0.1046   | 0.551  | 1.1126 | 1.0945 | 0.0051 | 76.57 |
| 10 | 110617893 | rs11194286 | C | T | 4 | 0.05938  | 0.5515 | 1.09   | 1.0507 | 0.0488 | 61.87 |
| 10 | 110618205 | rs10884687 | A | T | 4 | 0.05938  | 0.5515 | 1.09   | 1.0507 | 0.0488 | 61.87 |
| 2  | 197777124 | rs2579408  | A | G | 4 | 0.1663   | 0.5522 | 1.1457 | 1.1606 | 0.0025 | 79.07 |
| 4  | 72303517  | rs4521314  | A | C | 3 | 0.116    | 0.5522 | 1.1153 | 1.1773 | 0      | 90.16 |
| 13 | 75986324  | rs283982   | C | T | 4 | 0.04785  | 0.5523 | 1.0898 | 1.0508 | 0.0329 | 65.69 |
| 12 | 89248606  | rs825959   | C | T | 4 | 0.01012  | 0.5529 | 1.0985 | 1.0463 | 0.0163 | 70.81 |
| 3  | 176305423 | rs936474   | A | G | 4 | 0.7222   | 0.5531 | 0.9877 | 0.944  | 0.0003 | 83.78 |
| 6  | 73415061  | rs17749408 | A | G | 4 | 0.06763  | 0.5541 | 1.0847 | 1.0515 | 0.0354 | 65.04 |
| 5  | 73287272  | rs283618   | A | T | 4 | 0.02274  | 0.5543 | 0.9216 | 0.9418 | 0.0003 | 83.97 |
| 4  | 58828037  | rs13105776 | C | T | 4 | 0.02417  | 0.5549 | 1.1025 | 1.0556 | 0.0141 | 71.69 |
| 10 | 110615683 | rs12249791 | C | T | 4 | 0.06001  | 0.555  | 0.9176 | 0.952  | 0.0478 | 62.09 |
| 11 | 109527878 | rs1675981  | G | T | 3 | 0.6625   | 0.5551 | 1.0182 | 0.9234 | 0.0001 | 89.02 |
| 11 | 44189011  | rs4755234  | C | T | 4 | 0.958    | 0.5555 | 0.9981 | 0.9489 | 0.0024 | 79.22 |
| 1  | 66950593  | rs10889649 | A | G | 4 | 0.08885  | 0.5556 | 1.0663 | 1.0436 | 0.0339 | 65.43 |
| 2  | 51622416  | rs7592062  | A | G | 4 | 0.09364  | 0.5557 | 1.061  | 1.0434 | 0.0209 | 69.21 |
| 8  | 109516004 | rs10089406 | C | T | 4 | 0.1131   | 0.556  | 0.942  | 0.9527 | 0.0103 | 73.4  |
| 20 | 47357021  | rs11907908 | C | T | 4 | 0.01628  | 0.556  | 0.8412 | 0.9143 | 0.0156 | 71.09 |
| 2  | 38459723  | rs3806551  | C | G | 4 | 0.5022   | 0.5567 | 0.9761 | 0.9471 | 0.0015 | 80.56 |

|    |           |            |   |   |   |          |        |        |        |        |       |
|----|-----------|------------|---|---|---|----------|--------|--------|--------|--------|-------|
| 12 | 87296649  | rs2111038  | C | T | 4 | 0.1088   | 0.5569 | 1.1112 | 1.0933 | 0.0049 | 76.7  |
| 11 | 44191829  | rs1532353  | C | T | 4 | 0.9617   | 0.557  | 1.0017 | 1.0537 | 0.0024 | 79.24 |
| 3  | 176309927 | rs6797428  | A | G | 4 | 0.6976   | 0.5575 | 1.0137 | 1.0571 | 0.0006 | 82.88 |
| 3  | 176309960 | rs6797510  | A | G | 4 | 0.6976   | 0.5575 | 1.0137 | 1.0571 | 0.0006 | 82.88 |
| 6  | 73415342  | rs17749420 | C | G | 4 | 0.07006  | 0.5581 | 1.084  | 1.051  | 0.0353 | 65.08 |
| 1  | 152592990 | rs6688376  | C | T | 4 | 0.8582   | 0.5585 | 0.993  | 0.9483 | 0.0065 | 75.58 |
| 4  | 58818055  | rs11133552 | A | G | 4 | 0.01377  | 0.5588 | 1.0993 | 1.0538 | 0.005  | 76.64 |
| 8  | 54427066  | rs11995645 | C | T | 4 | 0.02946  | 0.5588 | 1.1316 | 1.0816 | 0.0043 | 77.24 |
| 11 | 109528270 | rs667625   | G | T | 3 | 0.6515   | 0.5588 | 1.0189 | 0.9243 | 0.0001 | 88.97 |
| 2  | 107791059 | rs17021776 | C | T | 3 | 0.006494 | 0.5593 | 0.7643 | 0.8625 | 0.012  | 77.39 |
| 18 | 20402971  | rs9304466  | C | G | 4 | 0.5629   | 0.5596 | 0.9786 | 1.0584 | 0.0012 | 81.16 |
| 6  | 121495669 | rs9401370  | A | T | 4 | 0.01804  | 0.5605 | 0.8998 | 0.9499 | 0.0286 | 66.86 |
| 14 | 32679185  | rs7155495  | C | T | 4 | 0.08983  | 0.5606 | 0.9394 | 0.9595 | 0.0336 | 65.5  |
| 4  | 21478058  | rs2063657  | A | G | 4 | 0.8266   | 0.5607 | 0.9923 | 0.9462 | 0.0006 | 82.72 |
| 18 | 20407884  | rs4800186  | A | T | 4 | 0.5541   | 0.5608 | 0.9781 | 1.0585 | 0.0011 | 81.36 |
| 8  | 54427119  | rs11985025 | A | T | 4 | 0.03001  | 0.561  | 1.1311 | 1.0812 | 0.0042 | 77.3  |
| 6  | 29908080  | rs2517897  | A | C | 4 | 0.08385  | 0.5616 | 0.9154 | 0.9402 | 0.017  | 70.55 |
| 12 | 97086002  | rs1160327  | A | G | 4 | 0.5884   | 0.5616 | 1.0197 | 0.9506 | 0.0036 | 77.87 |
| 10 | 110625352 | rs12250102 | C | T | 4 | 0.05856  | 0.5622 | 1.0904 | 1.0497 | 0.0466 | 62.37 |
| 2  | 134735206 | rs3791266  | C | G | 4 | 0.02751  | 0.5628 | 0.8214 | 0.8876 | 0.0112 | 72.98 |
| 4  | 21478155  | rs2063656  | A | C | 4 | 0.8318   | 0.5629 | 1.0075 | 1.0567 | 0.0006 | 82.81 |
| 12 | 87295390  | rs2407649  | C | T | 4 | 0.103    | 0.5629 | 0.8993 | 0.9164 | 0.005  | 76.65 |
| 7  | 44212378  | rs917793   | A | T | 4 | 0.06223  | 0.563  | 0.9181 | 0.9522 | 0.0488 | 61.88 |
| 6  | 121498592 | rs9375002  | A | C | 4 | 0.01857  | 0.5631 | 1.1108 | 1.0524 | 0.0286 | 66.86 |
| 7  | 49076176  | rs11762613 | A | C | 4 | 0.6066   | 0.5634 | 1.0217 | 1.0604 | 0.0026 | 78.93 |
| 15 | 58977303  | rs17237465 | C | T | 4 | 0.08034  | 0.5634 | 0.9348 | 0.9387 | 0.0003 | 84.32 |
| 7  | 125571034 | rs648172   | A | T | 4 | 0.07506  | 0.5635 | 0.9099 | 0.942  | 0.0284 | 66.91 |
| 5  | 98306052  | rs327807   | A | G | 4 | 0.6526   | 0.5636 | 1.0169 | 1.0525 | 0.0041 | 77.35 |
| 18 | 20402119  | rs4800580  | A | G | 4 | 0.5455   | 0.5637 | 1.0228 | 0.9451 | 0.0011 | 81.4  |
| 11 | 44205402  | rs4755236  | C | G | 4 | 0.9494   | 0.5641 | 0.9977 | 0.9494 | 0.0017 | 80.12 |
| 1  | 202827613 | rs4951409  | A | T | 4 | 0.08928  | 0.5647 | 0.9387 | 0.9593 | 0.0334 | 65.55 |
| 2  | 38396077  | rs12712583 | C | T | 4 | 0.4644   | 0.565  | 0.9744 | 0.9492 | 0.0016 | 80.39 |
| 6  | 124526687 | rs811418   | A | C | 4 | 0.01381  | 0.5653 | 0.873  | 0.941  | 0.0282 | 66.98 |
| 13 | 39500347  | rs9603665  | C | T | 4 | 0.6784   | 0.5654 | 0.9853 | 0.9535 | 0.0052 | 76.5  |
| 7  | 49051370  | rs4129516  | C | T | 4 | 0.5771   | 0.5655 | 1.0236 | 1.062  | 0.0017 | 80.15 |
| 18 | 20403739  | rs9950310  | C | T | 4 | 0.5435   | 0.5658 | 1.023  | 0.9455 | 0.0011 | 81.31 |
| 18 | 20403162  | rs9304467  | A | G | 4 | 0.543    | 0.5663 | 1.023  | 0.9456 | 0.0011 | 81.3  |

|    |           |            |   |   |   |          |        |        |        |        |       |
|----|-----------|------------|---|---|---|----------|--------|--------|--------|--------|-------|
| 1  | 66948145  | rs1547644  | A | G | 4 | 0.09539  | 0.5665 | 0.939  | 0.9592 | 0.0333 | 65.58 |
| 14 | 32677988  | rs8011345  | A | G | 4 | 0.086    | 0.5665 | 0.9387 | 0.9594 | 0.0293 | 66.65 |
| 2  | 38464515  | rs10182455 | A | G | 4 | 0.532    | 0.5668 | 0.9779 | 0.9482 | 0.0013 | 81    |
| 2  | 38374562  | rs3755025  | C | T | 4 | 0.4219   | 0.568  | 0.9717 | 0.9524 | 0.004  | 77.49 |
| 7  | 6384803   | rs2347338  | C | T | 4 | 0.9895   | 0.5682 | 1.0013 | 0.8639 | 0.0005 | 83.28 |
| 11 | 125258570 | rs540225   | C | T | 4 | 0.6935   | 0.5691 | 1.0149 | 1.0534 | 0.0031 | 78.4  |
| 20 | 14862709  | rs2423853  | A | T | 4 | 0.4278   | 0.5692 | 0.9724 | 0.9484 | 0.001  | 81.66 |
| 6  | 83338480  | rs9449500  | G | T | 4 | 0.8035   | 0.57   | 1.0263 | 1.158  | 0.0012 | 81.13 |
| 4  | 71149965  | rs6811318  | C | T | 4 | 0.1308   | 0.5701 | 1.0795 | 1.0675 | 0.0074 | 74.98 |
| 15 | 89929416  | rs12324460 | C | T | 4 | 0.8304   | 0.5704 | 1.0114 | 0.9321 | 0.0055 | 76.28 |
| 5  | 98947056  | rs17167077 | C | T | 4 | 0.07725  | 0.5712 | 0.8677 | 0.9164 | 0.0318 | 65.99 |
| 3  | 144993002 | rs16854336 | C | T | 4 | 0.001002 | 0.5715 | 0.854  | 0.9416 | 0.0106 | 73.28 |
| 4  | 71147532  | rs3775747  | C | T | 4 | 0.09973  | 0.5727 | 0.9158 | 0.9295 | 0.003  | 78.46 |
| 2  | 38374360  | rs4670861  | C | T | 4 | 0.4356   | 0.573  | 0.9725 | 0.953  | 0.004  | 77.49 |
| 15 | 58976901  | rs3803487  | A | G | 4 | 0.09012  | 0.5733 | 0.9367 | 0.9401 | 0.0002 | 84.38 |
| 20 | 47387176  | rs7261606  | C | T | 4 | 0.07729  | 0.5737 | 0.8895 | 0.9306 | 0.0353 | 65.07 |
| 5  | 62564201  | rs164105   | A | G | 4 | 0.6854   | 0.5742 | 0.9783 | 0.9262 | 0.0023 | 79.28 |
| 7  | 125574072 | rs585146   | C | T | 4 | 0.08045  | 0.5744 | 1.0972 | 1.06   | 0.0278 | 67.09 |
| 10 | 110512008 | rs7091393  | C | T | 4 | 0.04526  | 0.5747 | 1.1015 | 1.0527 | 0.0339 | 65.43 |
| 4  | 58821899  | rs2412885  | C | T | 4 | 0.01584  | 0.5748 | 0.9114 | 0.9506 | 0.0045 | 77.05 |
| 12 | 87265181  | rs10745477 | G | T | 4 | 0.1015   | 0.5749 | 0.8985 | 0.9214 | 0.0076 | 74.89 |
| 12 | 87296520  | rs2160432  | C | T | 4 | 0.1102   | 0.5753 | 0.9012 | 0.9181 | 0.0044 | 77.15 |
| 7  | 44202193  | rs4607517  | A | G | 4 | 0.06267  | 0.5762 | 1.0891 | 1.049  | 0.0454 | 62.65 |
| 12 | 9920781   | rs7313246  | A | T | 4 | 0.4903   | 0.5764 | 0.9735 | 1.0619 | 0.0004 | 83.38 |
| 3  | 176312988 | rs7646135  | A | T | 4 | 0.7031   | 0.5769 | 1.0135 | 1.0554 | 0.0005 | 83.26 |
| 1  | 202834775 | rs6594018  | A | G | 4 | 0.09614  | 0.577  | 1.064  | 1.0407 | 0.0353 | 65.07 |
| 16 | 7338030   | rs13330100 | C | T | 4 | 0.01691  | 0.5771 | 0.8791 | 0.9409 | 0.0255 | 67.75 |
| 3  | 117048396 | rs2972481  | A | G | 4 | 0.03193  | 0.5772 | 1.1577 | 1.0765 | 0.0346 | 65.24 |
| 12 | 32214624  | rs10506083 | A | G | 4 | 0.007623 | 0.5775 | 1.1017 | 1.0486 | 0.0042 | 77.28 |
| 5  | 62549494  | rs346405   | A | C | 4 | 0.6915   | 0.5779 | 1.0215 | 1.0788 | 0.0021 | 79.6  |
| 5  | 62564968  | rs346420   | G | T | 4 | 0.6705   | 0.5779 | 0.9771 | 0.926  | 0.0021 | 79.54 |
| 2  | 38397553  | rs1022076  | C | T | 4 | 0.4847   | 0.5784 | 1.025  | 1.0519 | 0.0015 | 80.61 |
| 8  | 109508139 | rs6469185  | A | T | 4 | 0.1726   | 0.579  | 1.0506 | 1.0485 | 0.0045 | 77.05 |
| 5  | 62565739  | rs346421   | G | T | 4 | 0.6682   | 0.5791 | 1.0238 | 1.0798 | 0.0022 | 79.45 |
| 13 | 39493988  | rs4943722  | A | G | 4 | 0.6855   | 0.5792 | 1.0146 | 1.0476 | 0.0044 | 77.12 |
| 8  | 2652265   | rs12542624 | A | G | 4 | 0.03435  | 0.5793 | 1.0903 | 1.0493 | 0.0151 | 71.29 |
| 8  | 135176557 | rs7830450  | C | T | 4 | 0.03233  | 0.5795 | 0.928  | 0.955  | 0.004  | 77.51 |

|    |           |            |   |   |   |         |        |        |        |        |       |
|----|-----------|------------|---|---|---|---------|--------|--------|--------|--------|-------|
| 7  | 147248774 | rs7805492  | C | T | 4 | 0.3721  | 0.58   | 1.0359 | 1.0572 | 0.0016 | 80.38 |
| 10 | 110644569 | rs17778423 | C | G | 4 | 0.05227 | 0.5805 | 1.0922 | 1.048  | 0.0407 | 63.74 |
| 10 | 110644600 | rs17700240 | A | G | 4 | 0.05227 | 0.5805 | 1.0922 | 1.048  | 0.0407 | 63.74 |
| 7  | 147248819 | rs7805515  | C | T | 4 | 0.3727  | 0.5806 | 1.0358 | 1.057  | 0.0016 | 80.34 |
| 4  | 71150032  | rs6811366  | C | T | 4 | 0.1386  | 0.5808 | 1.0778 | 1.0661 | 0.0067 | 75.41 |
| 3  | 176306423 | rs9290531  | A | G | 4 | 0.9329  | 0.5813 | 0.9971 | 1.056  | 0.0002 | 84.4  |
| 11 | 13480447  | rs10832047 | A | T | 4 | 0.9228  | 0.5817 | 1.0036 | 0.9544 | 0.0061 | 75.83 |
| 20 | 47349857  | rs761498   | C | T | 4 | 0.01777 | 0.5821 | 0.8443 | 0.9183 | 0.0123 | 72.45 |
| 12 | 87270942  | rs10745478 | G | T | 4 | 0.1307  | 0.5823 | 0.9046 | 0.9181 | 0.004  | 77.48 |
| 7  | 44198411  | rs6975024  | C | T | 4 | 0.06432 | 0.5827 | 1.0885 | 1.0483 | 0.0443 | 62.9  |
| 3  | 176304842 | rs936475   | G | T | 4 | 0.7422  | 0.5828 | 0.9886 | 0.9474 | 0.0003 | 84.09 |
| 7  | 125570670 | rs473816   | A | G | 4 | 0.08057 | 0.5828 | 0.9114 | 0.9439 | 0.0249 | 67.94 |
| 21 | 36478878  | rs2252991  | A | G | 4 | 0.4578  | 0.5834 | 0.9722 | 0.9494 | 0.0023 | 79.32 |
| 21 | 29936192  | rs363529   | C | G | 4 | 0.6867  | 0.5837 | 0.9807 | 0.932  | 0.0007 | 82.33 |
| 7  | 147248660 | rs7805223  | C | T | 4 | 0.3839  | 0.5844 | 1.035  | 1.0565 | 0.0016 | 80.43 |
| 9  | 123781479 | rs7855045  | A | G | 4 | 0.4311  | 0.5844 | 1.0282 | 1.0515 | 0.0011 | 81.29 |
| 2  | 197769903 | rs2579409  | G | T | 4 | 0.1852  | 0.5849 | 0.8754 | 0.8678 | 0.0019 | 79.92 |
| 4  | 58824709  | rs2244536  | A | C | 4 | 0.01751 | 0.5849 | 1.0956 | 1.0508 | 0.0043 | 77.22 |
| 6  | 90707807  | rs3734662  | C | T | 3 | 0.4957  | 0.5855 | 0.9687 | 0.9253 | 0.0024 | 83.39 |
| 8  | 4081435   | rs17069674 | C | T | 4 | 0.4581  | 0.5858 | 1.0685 | 1.1388 | 0.0005 | 83.04 |
| 18 | 6396037   | rs11081233 | A | G | 4 | 0.08427 | 0.5862 | 0.9355 | 0.9581 | 0.0195 | 69.67 |
| 8  | 124803982 | rs3898733  | C | T | 4 | 0.9695  | 0.5863 | 0.9985 | 1.0582 | 0.001  | 81.65 |
| 14 | 34502938  | rs2273154  | C | T | 4 | 0.6274  | 0.5872 | 1.023  | 1.0649 | 0.0025 | 79.1  |
| 8  | 54353314  | rs9792306  | C | T | 4 | 0.03424 | 0.5874 | 0.8857 | 0.9331 | 0.0073 | 75.07 |
| 16 | 45096893  | rs9935841  | A | G | 4 | 0.8398  | 0.5882 | 0.99   | 1.0743 | 0.0005 | 83.02 |
| 20 | 47381910  | rs6012644  | C | G | 4 | 0.1101  | 0.5886 | 1.1192 | 1.0799 | 0.024  | 68.21 |
| 1  | 202833323 | rs11240761 | A | C | 4 | 0.09818 | 0.5888 | 0.9402 | 0.9616 | 0.0321 | 65.91 |
| 14 | 42258722  | rs1698517  | C | T | 4 | 0.2181  | 0.5891 | 1.0991 | 1.1176 | 0.0011 | 81.29 |
| 3  | 151306869 | rs9834782  | A | C | 4 | 0.7149  | 0.5896 | 1.0193 | 0.9335 | 0.0034 | 78.08 |
| 2  | 38371019  | rs11894455 | C | T | 4 | 0.4697  | 0.5897 | 1.0262 | 1.0476 | 0.0035 | 77.93 |
| 7  | 147249143 | rs7805990  | G | T | 4 | 0.3933  | 0.5904 | 1.0343 | 1.0557 | 0.0015 | 80.51 |
| 2  | 107969863 | rs2433718  | A | G | 4 | 0.1029  | 0.5907 | 0.9229 | 0.9431 | 0.0084 | 74.42 |
| 4  | 21465676  | rs1040036  | G | T | 4 | 0.9983  | 0.5908 | 0.9999 | 0.9504 | 0.0009 | 81.92 |
| 2  | 38403041  | rs7593981  | A | T | 4 | 0.5496  | 0.5909 | 0.979  | 0.9522 | 0.0015 | 80.58 |
| 2  | 38403917  | rs9808407  | A | C | 4 | 0.5496  | 0.5909 | 0.979  | 0.9522 | 0.0015 | 80.58 |
| 11 | 115297985 | rs374729   | A | G | 4 | 0.08279 | 0.5909 | 1.0693 | 1.0422 | 0.0264 | 67.48 |
| 7  | 147244691 | rs2538959  | G | T | 4 | 0.4119  | 0.591  | 1.0329 | 1.055  | 0.0018 | 80.06 |

|    |           |            |   |   |   |         |        |        |        |        |       |
|----|-----------|------------|---|---|---|---------|--------|--------|--------|--------|-------|
| 5  | 159173066 | rs6862385  | A | C | 4 | 0.7965  | 0.5912 | 0.9621 | 0.8342 | 0.0039 | 77.54 |
| 10 | 110493441 | rs11597369 | A | C | 4 | 0.05063 | 0.5912 | 1.0948 | 1.0474 | 0.0405 | 63.78 |
| 4  | 171439939 | rs17055545 | G | T | 4 | 0.04891 | 0.5918 | 1.2343 | 1.1288 | 0.0237 | 68.3  |
| 3  | 24635868  | rs11129156 | A | G | 4 | 0.07606 | 0.592  | 1.0733 | 1.0485 | 0.0083 | 74.48 |
| 1  | 81202644  | rs7515605  | A | G | 4 | 0.07883 | 0.5924 | 0.9185 | 0.9477 | 0.0165 | 70.73 |
| 19 | 57268291  | rs8101936  | A | T | 4 | 0.8854  | 0.5927 | 0.9944 | 1.0499 | 0.0043 | 77.22 |
| 2  | 134740952 | rs3791273  | C | G | 4 | 0.0345  | 0.5937 | 1.1989 | 1.1053 | 0.0192 | 69.76 |
| 8  | 54378028  | rs11995818 | A | T | 4 | 0.03528 | 0.5938 | 1.1268 | 1.073  | 0.005  | 76.66 |
| 1  | 202831635 | rs2887429  | G | T | 4 | 0.1024  | 0.5942 | 1.0628 | 1.0395 | 0.031  | 66.19 |
| 5  | 159163705 | rs11957357 | A | C | 4 | 0.8034  | 0.5943 | 0.9635 | 0.835  | 0.0038 | 77.68 |
| 5  | 159164640 | rs1432711  | C | T | 4 | 0.8072  | 0.5943 | 0.9641 | 0.8353 | 0.0039 | 77.57 |
| 16 | 7343080   | rs17146172 | C | T | 4 | 0.01217 | 0.5947 | 1.1517 | 1.066  | 0.0156 | 71.08 |
| 1  | 202832806 | rs6682208  | C | T | 4 | 0.1019  | 0.5953 | 0.9409 | 0.962  | 0.0306 | 66.3  |
| 10 | 122586221 | rs12360470 | A | G | 4 | 0.395   | 0.5953 | 1.106  | 1.1893 | 0.0005 | 83.07 |
| 2  | 51330460  | rs2098441  | A | G | 4 | 0.5093  | 0.5956 | 0.976  | 0.9549 | 0.0041 | 77.34 |
| 15 | 51195489  | rs689991   | A | G | 4 | 0.02255 | 0.5957 | 0.9071 | 0.9516 | 0.01   | 73.55 |
| 19 | 57270159  | rs1560690  | A | G | 4 | 0.8723  | 0.5961 | 1.0062 | 0.9528 | 0.0042 | 77.33 |
| 1  | 46637098  | rs6429600  | A | G | 4 | 0.9552  | 0.5964 | 0.9977 | 0.9523 | 0.0061 | 75.85 |
| 15 | 31695395  | rs12593288 | C | T | 4 | 0.7121  | 0.5964 | 0.984  | 1.0599 | 0.0024 | 79.24 |
| 1  | 55446008  | rs6703366  | G | T | 4 | 0.02286 | 0.5967 | 1.1067 | 1.0468 | 0.0337 | 65.48 |
| 8  | 54386635  | rs7465082  | G | T | 4 | 0.03522 | 0.5975 | 1.1269 | 1.0727 | 0.0046 | 76.92 |
| 8  | 97172072  | rs16894295 | A | G | 4 | 0.8616  | 0.5977 | 0.9858 | 1.1274 | 0.0003 | 84.21 |
| 5  | 178252143 | rs6865216  | A | G | 4 | 0.5115  | 0.598  | 1.0388 | 1.0882 | 0.0003 | 83.95 |
| 7  | 147247057 | rs2538957  | C | T | 4 | 0.383   | 0.598  | 1.0351 | 1.055  | 0.0014 | 80.79 |
| 2  | 38391130  | rs2305245  | A | C | 4 | 0.5515  | 0.5983 | 1.0213 | 1.0492 | 0.0015 | 80.54 |
| 5  | 6573684   | rs931062   | C | T | 4 | 0.7895  | 0.5985 | 0.9879 | 1.0629 | 0.0014 | 80.67 |
| 5  | 178229512 | rs11950641 | C | T | 4 | 0.5436  | 0.5986 | 1.0345 | 1.0853 | 0.0003 | 84.11 |
| 14 | 32677389  | rs4982055  | G | T | 4 | 0.108   | 0.5987 | 0.942  | 0.9617 | 0.0255 | 67.77 |
| 6  | 136520887 | rs1038214  | A | G | 4 | 0.8433  | 0.599  | 0.993  | 0.9507 | 0.0006 | 82.73 |
| 13 | 39501308  | rs9549041  | C | T | 4 | 0.7419  | 0.5993 | 0.9883 | 0.957  | 0.0046 | 76.97 |
| 13 | 67631961  | rs17083147 | C | T | 3 | 0.1741  | 0.5996 | 0.8248 | 1.3173 | 0.0001 | 89.39 |
| 5  | 159168956 | rs6883903  | A | G | 4 | 0.8104  | 0.5998 | 1.0366 | 1.1932 | 0.0042 | 77.31 |
| 4  | 58828880  | rs1368608  | A | G | 4 | 0.02064 | 0.5999 | 0.9149 | 0.9533 | 0.0039 | 77.52 |
| 4  | 71136589  | rs1825033  | A | G | 4 | 0.1132  | 0.6001 | 0.923  | 0.938  | 0.0036 | 77.87 |
| 21 | 17225142  | rs2243683  | A | G | 4 | 0.04036 | 0.6002 | 1.0759 | 1.0383 | 0.0247 | 68.01 |
| 4  | 71146872  | rs17520678 | A | C | 4 | 0.1201  | 0.6006 | 1.0858 | 1.0676 | 0.0043 | 77.17 |
| 13 | 67606518  | rs11840273 | A | G | 3 | 0.1713  | 0.6008 | 0.8237 | 1.3166 | 0.0001 | 89.42 |

|    |           |            |   |   |   |         |        |        |        |        |       |
|----|-----------|------------|---|---|---|---------|--------|--------|--------|--------|-------|
| 13 | 67611790  | rs2325107  | A | G | 3 | 0.1713  | 0.6008 | 0.8237 | 1.3166 | 0.0001 | 89.42 |
| 19 | 57264112  | rs11669439 | C | T | 4 | 0.8605  | 0.6009 | 1.0068 | 0.9534 | 0.0042 | 77.27 |
| 13 | 67598341  | rs17083120 | C | T | 3 | 0.1702  | 0.6013 | 1.2146 | 0.7596 | 0.0001 | 89.43 |
| 13 | 67599095  | rs17083124 | A | T | 3 | 0.1702  | 0.6013 | 1.2146 | 0.7596 | 0.0001 | 89.43 |
| 5  | 159168575 | rs6884390  | C | T | 4 | 0.8161  | 0.6022 | 0.9657 | 0.8391 | 0.0042 | 77.31 |
| 8  | 21342868  | rs7460673  | C | T | 4 | 0.516   | 0.6022 | 0.9719 | 0.9416 | 0.0008 | 82.17 |
| 3  | 134945497 | rs16840812 | C | T | 4 | 0.1488  | 0.6025 | 1.0708 | 1.0559 | 0.0085 | 74.34 |
| 7  | 44195593  | rs1799884  | C | T | 4 | 0.07248 | 0.6026 | 0.9211 | 0.9559 | 0.0402 | 63.86 |
| 11 | 125183381 | rs7929262  | A | T | 4 | 0.6952  | 0.6027 | 0.9854 | 0.9533 | 0.0029 | 78.63 |
| 4  | 92645841  | rs6849851  | A | G | 4 | 0.2521  | 0.6028 | 1.0429 | 1.0522 | 0.0009 | 81.69 |
| 5  | 6574202   | rs4702359  | A | G | 4 | 0.9908  | 0.6034 | 1.0005 | 0.942  | 0.0006 | 82.72 |
| 11 | 10881592  | rs11043009 | C | T | 4 | 0.06211 | 0.6035 | 1.1035 | 1.0582 | 0.0159 | 70.98 |
| 13 | 39500866  | rs366300   | C | T | 4 | 0.8263  | 0.6035 | 1.0078 | 1.0462 | 0.0027 | 78.76 |
| 2  | 51334759  | rs2098446  | A | G | 4 | 0.5256  | 0.6036 | 1.0236 | 1.0464 | 0.0039 | 77.59 |
| 2  | 38456015  | rs6760123  | C | T | 4 | 0.5918  | 0.6039 | 1.0194 | 1.0496 | 0.0012 | 81.09 |
| 12 | 87292097  | rs2407653  | A | C | 4 | 0.122   | 0.6043 | 0.9046 | 0.9228 | 0.0034 | 78.08 |
| 10 | 110531064 | rs945824   | C | T | 4 | 0.05854 | 0.6047 | 1.0902 | 1.0453 | 0.0386 | 64.24 |
| 2  | 51341929  | rs13420545 | C | T | 4 | 0.5553  | 0.6048 | 0.9785 | 0.9563 | 0.0048 | 76.78 |
| 3  | 176315311 | rs6774509  | A | T | 4 | 0.8825  | 0.6049 | 0.9949 | 0.9512 | 0.0004 | 83.51 |
| 9  | 24988099  | rs10966629 | A | G | 4 | 0.8825  | 0.605  | 0.9946 | 1.0469 | 0.0032 | 78.21 |
| 4  | 58850166  | rs17603347 | C | T | 4 | 0.03085 | 0.6055 | 1.095  | 1.0539 | 0.0029 | 78.59 |
| 3  | 176304233 | rs9869809  | A | T | 4 | 0.9993  | 0.6061 | 1      | 0.9478 | 0.0001 | 85.51 |
| 7  | 125572333 | rs674616   | C | T | 4 | 0.09202 | 0.607  | 0.9145 | 0.9468 | 0.0227 | 68.6  |
| 16 | 29901187  | rs9925915  | C | G | 4 | 0.7913  | 0.6074 | 0.9908 | 1.0466 | 0.0017 | 80.24 |
| 1  | 202835233 | rs6594019  | C | T | 4 | 0.1087  | 0.6075 | 0.942  | 0.9633 | 0.0307 | 66.27 |
| 8  | 21341257  | rs17607798 | A | C | 4 | 0.4755  | 0.6076 | 0.9705 | 0.9437 | 0.0006 | 82.8  |
| 6  | 124525535 | rs749212   | A | G | 4 | 0.01542 | 0.6077 | 1.1354 | 1.0547 | 0.0227 | 68.62 |
| 19 | 61166048  | rs12611033 | A | G | 4 | 0.8546  | 0.6083 | 1.009  | 0.9342 | 0.0007 | 82.33 |
| 16 | 29895850  | rs4283241  | A | G | 4 | 0.7835  | 0.6087 | 0.9905 | 1.0464 | 0.0016 | 80.27 |
| 1  | 46634494  | rs2145408  | A | G | 4 | 0.9935  | 0.6094 | 0.9997 | 1.0486 | 0.005  | 76.6  |
| 8  | 109494368 | rs13249775 | C | T | 4 | 0.1909  | 0.6094 | 0.954  | 0.9573 | 0.0044 | 77.11 |
| 20 | 47306203  | rs6012627  | A | G | 4 | 0.01644 | 0.6101 | 0.8416 | 0.9223 | 0.01   | 73.58 |
| 13 | 67594394  | rs17083114 | C | T | 3 | 0.1643  | 0.6104 | 1.2179 | 0.7666 | 0.0001 | 89.26 |
| 20 | 47147339  | rs2426130  | C | T | 4 | 0.04772 | 0.611  | 1.14   | 1.0687 | 0.0288 | 66.8  |
| 15 | 58089832  | rs9920841  | A | G | 3 | 0.6174  | 0.6111 | 1.0262 | 0.9233 | 0.0003 | 87.54 |
| 9  | 2663393   | rs1542358  | C | T | 4 | 0.6615  | 0.6116 | 0.9702 | 0.9126 | 0.0009 | 81.73 |
| 16 | 29894026  | rs11150577 | A | G | 4 | 0.7788  | 0.6119 | 0.9902 | 1.0456 | 0.0019 | 79.83 |



|    |           |            |   |   |   |          |        |        |        |        |       |
|----|-----------|------------|---|---|---|----------|--------|--------|--------|--------|-------|
| 1  | 214179910 | rs772713   | A | C | 4 | 0.62     | 0.612  | 1.0233 | 0.932  | 0.0001 | 86.48 |
| 2  | 134735267 | rs3828175  | A | G | 4 | 0.03397  | 0.612  | 0.827  | 0.8993 | 0.0099 | 73.6  |
| 8  | 21342815  | rs734364   | C | T | 4 | 0.488    | 0.6121 | 1.0296 | 1.059  | 0.0006 | 82.86 |
| 9  | 2671397   | rs7870258  | G | T | 4 | 0.6343   | 0.6121 | 1.0281 | 1.0798 | 0.001  | 81.67 |
| 1  | 214178831 | rs492474   | G | T | 4 | 0.5962   | 0.6122 | 0.9759 | 1.0733 | 0      | 86.84 |
| 1  | 214171349 | rs647908   | A | C | 4 | 0.5865   | 0.6123 | 0.9751 | 1.0738 | 0      | 86.93 |
| 16 | 29892340  | rs4318227  | C | G | 4 | 0.7778   | 0.6124 | 1.0099 | 0.9565 | 0.0019 | 79.81 |
| 3  | 18165497  | rs13060927 | A | G | 4 | 0.8538   | 0.6125 | 0.9906 | 1.0648 | 0.0028 | 78.74 |
| 13 | 89090532  | rs9555926  | A | G | 4 | 0.7303   | 0.6127 | 1.0429 | 1.1698 | 0.0006 | 82.58 |
| 5  | 26174463  | rs11953897 | A | G | 3 | 0.146    | 0.6132 | 1.1359 | 1.1404 | 0.0022 | 83.61 |
| 1  | 160510650 | rs6427667  | C | G | 4 | 0.3317   | 0.6133 | 0.9558 | 0.9348 | 0.0003 | 84.25 |
| 7  | 6389325   | rs10234438 | A | G | 4 | 0.8087   | 0.6134 | 1.0232 | 0.876  | 0.0002 | 84.49 |
| 16 | 7339253   | rs17143484 | C | T | 4 | 0.01145  | 0.6135 | 1.1543 | 1.0629 | 0.0158 | 71.03 |
| 16 | 29903381  | rs4787489  | A | G | 4 | 0.7655   | 0.6138 | 0.9896 | 1.0459 | 0.0016 | 80.35 |
| 16 | 29891571  | rs11901    | C | G | 4 | 0.781    | 0.6145 | 1.0098 | 0.957  | 0.0021 | 79.51 |
| 1  | 95561952  | rs17113374 | C | T | 4 | 0.5236   | 0.6147 | 0.9646 | 0.9295 | 0.0014 | 80.7  |
| 16 | 29885063  | rs4787486  | A | T | 4 | 0.7815   | 0.6147 | 1.0097 | 0.957  | 0.0021 | 79.52 |
| 16 | 29881668  | rs6565173  | A | G | 4 | 0.7817   | 0.6154 | 0.9904 | 1.0447 | 0.0022 | 79.46 |
| 6  | 124523315 | rs802273   | G | T | 4 | 0.01756  | 0.6157 | 0.8824 | 0.9492 | 0.0229 | 68.55 |
| 9  | 117019231 | rs10817727 | A | G | 4 | 0.004988 | 0.6157 | 0.8499 | 0.9362 | 0.0098 | 73.68 |
| 20 | 47271275  | rs6019695  | A | G | 4 | 0.01907  | 0.616  | 1.1815 | 1.0841 | 0.0079 | 74.69 |
| 7  | 125567593 | rs492757   | A | T | 4 | 0.09412  | 0.6163 | 1.093  | 1.0552 | 0.0211 | 69.13 |
| 16 | 29902719  | rs4788204  | A | G | 4 | 0.7565   | 0.6163 | 0.9892 | 1.0456 | 0.0016 | 80.39 |
| 13 | 39470070  | rs276420   | G | T | 4 | 0.9085   | 0.6167 | 0.996  | 0.957  | 0.0016 | 80.34 |
| 3  | 176319542 | rs2862042  | C | T | 4 | 0.9003   | 0.6168 | 0.9956 | 0.9519 | 0.0004 | 83.72 |
| 6  | 124525158 | rs802274   | A | G | 4 | 0.01703  | 0.617  | 0.8824 | 0.9495 | 0.0229 | 68.56 |
| 8  | 54386673  | rs7462232  | A | G | 4 | 0.04731  | 0.6172 | 1.1196 | 1.0669 | 0.0065 | 75.53 |
| 4  | 71093585  | rs17148330 | A | G | 4 | 0.1197   | 0.6175 | 0.9243 | 0.9403 | 0.0031 | 78.4  |
| 4  | 71148222  | rs10518071 | C | T | 4 | 0.1697   | 0.6176 | 0.9329 | 0.9422 | 0.0048 | 76.81 |
| 4  | 71146110  | rs1849717  | C | T | 4 | 0.1411   | 0.6178 | 1.0773 | 1.0626 | 0.0037 | 77.75 |
| 10 | 110514731 | rs11591352 | G | T | 4 | 0.05581  | 0.6179 | 1.0926 | 1.0467 | 0.0255 | 67.77 |
| 3  | 176319087 | rs6774272  | C | T | 4 | 0.9131   | 0.618  | 1.0038 | 1.0498 | 0.0004 | 83.75 |
| 16 | 29910577  | rs9924686  | A | G | 4 | 0.7306   | 0.6186 | 0.9881 | 1.0459 | 0.0013 | 80.96 |
| 11 | 10869437  | rs16908503 | A | G | 4 | 0.0538   | 0.6188 | 1.102  | 1.0519 | 0.0202 | 69.43 |
| 4  | 71149649  | rs3775739  | A | G | 4 | 0.1621   | 0.6194 | 0.9323 | 0.9446 | 0.0056 | 76.2  |
| 10 | 122589381 | rs12355703 | C | G | 4 | 0.4443   | 0.6199 | 1.0968 | 1.1796 | 0.0005 | 83.14 |
| 3  | 176315077 | rs6796537  | C | T | 4 | 0.9009   | 0.62   | 0.9957 | 0.953  | 0.0004 | 83.69 |

|    |           |            |   |   |   |          |        |        |        |        |       |
|----|-----------|------------|---|---|---|----------|--------|--------|--------|--------|-------|
| 3  | 176315114 | rs6809009  | G | T | 4 | 0.9069   | 0.6208 | 1.0041 | 1.0492 | 0.0004 | 83.72 |
| 3  | 176318751 | rs6773961  | A | T | 4 | 0.9069   | 0.6208 | 1.0041 | 1.0492 | 0.0004 | 83.72 |
| 6  | 124522342 | rs802270   | A | G | 4 | 0.01819  | 0.6212 | 1.1326 | 1.0526 | 0.0235 | 68.38 |
| 3  | 176299621 | rs1381130  | C | T | 4 | 0.6972   | 0.6215 | 1.0139 | 0.9545 | 0.0008 | 82.1  |
| 2  | 51625568  | rs12995836 | C | T | 4 | 0.1025   | 0.6216 | 0.9445 | 0.9634 | 0.0123 | 72.49 |
| 10 | 110659654 | rs11596191 | C | T | 4 | 0.06354  | 0.6217 | 0.9192 | 0.9586 | 0.0376 | 64.49 |
| 6  | 124512460 | rs2146252  | C | T | 4 | 0.02004  | 0.6218 | 1.1335 | 1.0537 | 0.0236 | 68.33 |
| 10 | 110511738 | rs17769672 | C | G | 4 | 0.05992  | 0.6219 | 1.0921 | 1.0444 | 0.0369 | 64.67 |
| 1  | 214169893 | rs517577   | A | G | 4 | 0.58     | 0.6221 | 0.9746 | 1.0709 | 0.0001 | 86.52 |
| 3  | 176318826 | rs6809556  | C | T | 4 | 0.9102   | 0.6221 | 0.9961 | 0.9533 | 0.0004 | 83.68 |
| 9  | 7518098   | rs10758880 | A | C | 4 | 0.1164   | 0.6224 | 1.0565 | 1.0366 | 0.0182 | 70.12 |
| 9  | 7518239   | rs10815626 | C | T | 4 | 0.1164   | 0.6224 | 1.0565 | 1.0366 | 0.0182 | 70.12 |
| 14 | 42262582  | rs10149887 | A | T | 3 | 0.4313   | 0.6225 | 1.0844 | 1.1643 | 0.0013 | 84.88 |
| 7  | 136935020 | rs706568   | A | T | 4 | 0.08333  | 0.6229 | 1.1407 | 1.1049 | 0.0007 | 82.25 |
| 1  | 21832177  | rs9426772  | C | T | 4 | 0.05397  | 0.623  | 0.9329 | 0.9656 | 0.0288 | 66.81 |
| 4  | 71136840  | rs1817460  | A | T | 4 | 0.1306   | 0.6232 | 0.9263 | 0.9407 | 0.0028 | 78.74 |
| 13 | 39479629  | rs276407   | A | G | 4 | 0.9557   | 0.6234 | 0.9981 | 0.958  | 0.0017 | 80.18 |
| 10 | 129848954 | rs6482659  | A | C | 3 | 0.775    | 0.6246 | 0.9851 | 1.0942 | 0.0002 | 88.47 |
| 1  | 214165817 | rs942837   | C | T | 4 | 0.5637   | 0.6254 | 1.0272 | 0.9343 | 0.0001 | 86.55 |
| 13 | 104283297 | rs7997861  | C | T | 4 | 0.9361   | 0.6257 | 0.9972 | 1.0469 | 0.0009 | 81.82 |
| 15 | 51195545  | rs584758   | A | G | 4 | 0.03198  | 0.6259 | 0.9125 | 0.955  | 0.0089 | 74.16 |
| 3  | 176311154 | rs4355289  | A | G | 4 | 0.9279   | 0.6261 | 1.0031 | 1.0485 | 0.0004 | 83.72 |
| 16 | 29896442  | rs4583255  | A | G | 4 | 0.7221   | 0.6261 | 1.0125 | 0.9574 | 0.0015 | 80.55 |
| 13 | 104282736 | rs1326452  | A | G | 4 | 0.9348   | 0.6265 | 0.9971 | 1.0467 | 0.0009 | 81.78 |
| 15 | 31694920  | rs4238566  | A | C | 4 | 0.7606   | 0.6269 | 1.0122 | 0.9531 | 0.0028 | 78.71 |
| 5  | 40303687  | rs2279170  | C | T | 4 | 0.009422 | 0.6271 | 1.1006 | 1.0392 | 0.0135 | 71.94 |
| 10 | 110503291 | rs12256452 | C | G | 4 | 0.04812  | 0.6271 | 1.0944 | 1.0439 | 0.03   | 66.47 |
| 3  | 176314128 | rs9877212  | C | T | 4 | 0.9309   | 0.6272 | 1.003  | 1.048  | 0.0004 | 83.71 |
| 3  | 176315642 | rs6763592  | G | T | 4 | 0.8306   | 0.6272 | 1.0077 | 1.0426 | 0.0033 | 78.11 |
| 1  | 214170400 | rs662355   | C | G | 4 | 0.5761   | 0.6273 | 1.0264 | 0.9348 | 0.0001 | 86.49 |
| 7  | 125571959 | rs654111   | C | T | 4 | 0.1017   | 0.6273 | 0.9168 | 0.949  | 0.0203 | 69.42 |
| 2  | 38403351  | rs7606701  | A | C | 4 | 0.6299   | 0.6274 | 1.0173 | 1.0459 | 0.0013 | 80.94 |
| 16 | 29902237  | rs3814884  | A | T | 4 | 0.7748   | 0.6275 | 0.9898 | 1.0436 | 0.0026 | 78.98 |
| 10 | 110517348 | rs17697405 | C | T | 4 | 0.05913  | 0.6276 | 0.917  | 0.9586 | 0.035  | 65.14 |
| 2  | 29148520  | rs10200693 | A | G | 4 | 0.1026   | 0.6277 | 0.9348 | 0.9597 | 0.0206 | 69.31 |
| 13 | 104284951 | rs1409470  | A | G | 4 | 0.9536   | 0.628  | 1.0021 | 0.9554 | 0.0011 | 81.34 |
| 13 | 104285669 | rs1853979  | A | G | 4 | 0.9392   | 0.6282 | 0.9972 | 1.0464 | 0.0013 | 80.99 |

|    |           |            |   |   |   |          |        |        |        |        |       |
|----|-----------|------------|---|---|---|----------|--------|--------|--------|--------|-------|
| 1  | 66825324  | rs2166307  | C | T | 4 | 0.06538  | 0.6285 | 1.102  | 1.0524 | 0.029  | 66.73 |
| 6  | 124513424 | rs6569377  | C | T | 4 | 0.0203   | 0.6287 | 0.8831 | 0.9502 | 0.0235 | 68.36 |
| 13 | 104283684 | rs7139884  | A | C | 4 | 0.948    | 0.6287 | 0.9977 | 1.0465 | 0.001  | 81.61 |
| 5  | 26178629  | rs4701526  | C | G | 3 | 0.1347   | 0.6293 | 1.1399 | 1.1305 | 0.0029 | 82.85 |
| 6  | 124512495 | rs2146253  | A | G | 4 | 0.02172  | 0.6294 | 1.1316 | 1.0525 | 0.0238 | 68.26 |
| 8  | 4080287   | rs7819694  | C | T | 4 | 0.4919   | 0.6294 | 1.0648 | 1.1204 | 0.0011 | 81.44 |
| 4  | 71098553  | rs2306445  | A | G | 4 | 0.1304   | 0.6295 | 0.9263 | 0.9411 | 0.0023 | 79.24 |
| 13 | 104284523 | rs9519488  | A | T | 4 | 0.9271   | 0.6296 | 1.0033 | 0.9557 | 0.0011 | 81.42 |
| 2  | 232169359 | rs4973009  | A | G | 3 | 0.2019   | 0.6304 | 1.0857 | 1.1057 | 0.0001 | 88.95 |
| 6  | 124516437 | rs802253   | C | G | 4 | 0.02035  | 0.6304 | 0.8839 | 0.9509 | 0.024  | 68.21 |
| 3  | 176312381 | rs9847129  | C | T | 4 | 0.9472   | 0.6305 | 0.9977 | 0.9544 | 0.0004 | 83.69 |
| 6  | 124516266 | rs802251   | G | T | 4 | 0.02176  | 0.6309 | 0.8844 | 0.9508 | 0.0245 | 68.05 |
| 10 | 110512515 | rs6584895  | C | T | 4 | 0.06634  | 0.631  | 1.0888 | 1.0432 | 0.0347 | 65.22 |
| 4  | 71088800  | rs17148328 | C | T | 4 | 0.1234   | 0.6315 | 0.925  | 0.9425 | 0.003  | 78.48 |
| 7  | 125569040 | rs618766   | G | T | 4 | 0.1018   | 0.6317 | 0.9168 | 0.9493 | 0.019  | 69.84 |
| 1  | 214169419 | rs513746   | C | T | 4 | 0.5494   | 0.6318 | 1.0281 | 0.9361 | 0.0001 | 86.39 |
| 6  | 124516294 | rs802252   | C | T | 4 | 0.02227  | 0.6327 | 0.8849 | 0.9511 | 0.0245 | 68.06 |
| 9  | 86103553  | rs17427184 | A | G | 4 | 0.05171  | 0.6327 | 1.1343 | 1.09   | 0.0004 | 83.69 |
| 14 | 42261991  | rs1777075  | A | G | 3 | 0.4113   | 0.6327 | 1.0877 | 1.159  | 0.0012 | 85.19 |
| 6  | 124517096 | rs802255   | A | G | 4 | 0.02079  | 0.633  | 0.8843 | 0.9512 | 0.024  | 68.22 |
| 13 | 104287517 | rs9514325  | A | G | 4 | 0.9546   | 0.6331 | 0.9979 | 1.0461 | 0.0015 | 80.52 |
| 16 | 29875516  | rs7204797  | C | T | 4 | 0.7257   | 0.6332 | 1.0123 | 0.9591 | 0.002  | 79.69 |
| 16 | 22620480  | rs154537   | G | T | 4 | 0.06953  | 0.6333 | 1.0887 | 1.0433 | 0.0341 | 65.38 |
| 2  | 210413593 | rs10178675 | C | G | 4 | 0.003915 | 0.6334 | 0.8524 | 0.9439 | 0.0133 | 72.02 |
| 3  | 176299863 | rs9848123  | A | G | 4 | 0.6507   | 0.6337 | 1.0161 | 0.9558 | 0.0007 | 82.26 |
| 16 | 29908402  | rs3814881  | A | G | 4 | 0.6778   | 0.6337 | 0.9856 | 1.0442 | 0.0012 | 81.21 |
| 6  | 26794868  | rs7755721  | C | T | 4 | 0.9254   | 0.634  | 0.9963 | 1.0476 | 0.0028 | 78.66 |
| 6  | 124512907 | rs2008699  | C | T | 4 | 0.02055  | 0.6341 | 1.1321 | 1.0518 | 0.0228 | 68.58 |
| 6  | 124515810 | rs802249   | C | G | 4 | 0.02248  | 0.6345 | 1.13   | 1.0512 | 0.0245 | 68.07 |
| 7  | 136934899 | rs6949094  | C | T | 4 | 0.05343  | 0.6346 | 1.1693 | 1.1049 | 0.0013 | 80.94 |
| 4  | 58833846  | rs2553297  | C | T | 4 | 0.02315  | 0.6351 | 0.9164 | 0.9575 | 0.0039 | 77.59 |
| 12 | 87293574  | rs10858718 | C | G | 4 | 0.168    | 0.6351 | 1.0921 | 1.079  | 0.0018 | 79.99 |
| 10 | 122705142 | rs11199677 | A | C | 4 | 0.5899   | 0.6352 | 1.0704 | 1.1844 | 0.0004 | 83.49 |
| 3  | 144993820 | rs12233446 | C | T | 4 | 0.00129  | 0.6356 | 0.8588 | 0.9504 | 0.0084 | 74.43 |
| 6  | 124513036 | rs2008708  | A | G | 4 | 0.02127  | 0.6357 | 0.8839 | 0.9511 | 0.0232 | 68.46 |
| 7  | 44190467  | rs2908289  | A | G | 4 | 0.09102  | 0.6365 | 1.0815 | 1.0435 | 0.0322 | 65.87 |
| 10 | 110506325 | rs17769499 | A | C | 4 | 0.06427  | 0.6365 | 0.9179 | 0.9589 | 0.0327 | 65.74 |

|    |           |            |   |   |   |         |        |        |        |        |       |
|----|-----------|------------|---|---|---|---------|--------|--------|--------|--------|-------|
| 11 | 10861334  | rs1589596  | G | T | 4 | 0.05687 | 0.6365 | 0.9075 | 0.951  | 0.0148 | 71.4  |
| 8  | 109423278 | rs4734174  | A | G | 4 | 0.1648  | 0.6368 | 1.0514 | 1.0384 | 0.0104 | 73.35 |
| 6  | 124513519 | rs6932946  | G | T | 4 | 0.02188 | 0.637  | 1.1306 | 1.0511 | 0.0233 | 68.42 |
| 7  | 125564351 | rs639166   | C | T | 4 | 0.1292  | 0.6374 | 1.0855 | 1.0523 | 0.0228 | 68.58 |
| 10 | 110506183 | rs17769443 | A | G | 4 | 0.06422 | 0.6376 | 1.0895 | 1.0427 | 0.0324 | 65.81 |
| 10 | 110537793 | rs7920198  | A | G | 4 | 0.06613 | 0.6379 | 1.088  | 1.0414 | 0.0372 | 64.6  |
| 1  | 95555047  | rs17113360 | C | T | 4 | 0.5251  | 0.6381 | 1.0364 | 1.0685 | 0.002  | 79.71 |
| 16 | 29925396  | rs3814880  | C | T | 4 | 0.7182  | 0.6383 | 0.9875 | 1.0439 | 0.0011 | 81.4  |
| 10 | 110501214 | rs11194258 | A | G | 4 | 0.05039 | 0.6387 | 1.0935 | 1.0427 | 0.0283 | 66.94 |
| 9  | 7517476   | rs10758876 | G | T | 4 | 0.1274  | 0.6393 | 0.948  | 0.966  | 0.0164 | 70.78 |
| 16 | 29941134  | rs12325539 | C | T | 4 | 0.6789  | 0.6395 | 0.9847 | 1.0485 | 0.0006 | 82.79 |
| 9  | 2682393   | rs11788193 | A | T | 4 | 0.5284  | 0.64   | 1.0496 | 1.09   | 0.0028 | 78.66 |
| 8  | 109448088 | rs11780184 | C | T | 4 | 0.1932  | 0.6402 | 1.0487 | 1.0397 | 0.0068 | 75.37 |
| 7  | 44190246  | rs730497   | A | G | 4 | 0.09094 | 0.6404 | 1.0816 | 1.0433 | 0.031  | 66.2  |
| 9  | 7517489   | rs10758877 | C | T | 4 | 0.1265  | 0.6407 | 1.055  | 1.0351 | 0.0161 | 70.92 |
| 11 | 10865614  | rs10840506 | C | T | 4 | 0.05277 | 0.641  | 0.9075 | 0.953  | 0.0173 | 70.44 |
| 16 | 29938200  | rs11150581 | C | T | 4 | 0.6856  | 0.641  | 0.985  | 1.0482 | 0.0006 | 82.81 |
| 3  | 176302128 | rs9859106  | A | T | 4 | 0.5598  | 0.6412 | 1.0208 | 0.9579 | 0.0012 | 81.2  |
| 5  | 125194811 | rs17560965 | A | G | 4 | 0.7045  | 0.6416 | 1.0331 | 1.1009 | 0.0031 | 78.36 |
| 16 | 7342542   | rs9933137  | G | T | 4 | 0.0148  | 0.6417 | 1.1486 | 1.0588 | 0.0134 | 71.98 |
| 20 | 3499637   | rs17709518 | A | G | 4 | 0.9069  | 0.6421 | 0.9913 | 0.9192 | 0.0029 | 78.57 |
| 10 | 110503533 | rs10509877 | A | G | 4 | 0.05234 | 0.6424 | 1.0926 | 1.0422 | 0.0286 | 66.86 |
| 1  | 202835999 | rs11240764 | C | T | 4 | 0.1238  | 0.6426 | 0.9443 | 0.9661 | 0.0263 | 67.53 |
| 8  | 109444070 | rs1597145  | G | T | 4 | 0.1965  | 0.6426 | 1.0484 | 1.0396 | 0.0065 | 75.55 |
| 2  | 210419671 | rs6752217  | G | T | 4 | 0.00485 | 0.6427 | 0.8548 | 0.945  | 0.0133 | 72.03 |
| 6  | 26866458  | rs4711122  | C | T | 4 | 0.8298  | 0.643  | 1.0086 | 0.956  | 0.0029 | 78.53 |
| 16 | 29937696  | rs11642612 | A | C | 4 | 0.6806  | 0.6431 | 1.0155 | 0.9543 | 0.0006 | 82.77 |
| 16 | 29920767  | rs4788209  | C | T | 4 | 0.7229  | 0.6433 | 1.0127 | 0.9592 | 0.0017 | 80.23 |
| 7  | 125564375 | rs639211   | A | C | 4 | 0.1219  | 0.6434 | 1.0867 | 1.0517 | 0.0208 | 69.25 |
| 7  | 125565143 | rs642710   | C | T | 4 | 0.1041  | 0.6434 | 1.0901 | 1.0515 | 0.0191 | 69.83 |
| 4  | 183400923 | rs6840036  | C | T | 4 | 0.1562  | 0.6435 | 1.0589 | 1.0483 | 0.0017 | 80.14 |
| 2  | 107976696 | rs333217   | A | G | 4 | 0.1367  | 0.6438 | 0.9311 | 0.9531 | 0.0099 | 73.62 |
| 20 | 3508191   | rs17782370 | C | T | 4 | 0.896   | 0.6439 | 0.9903 | 0.92   | 0.003  | 78.5  |
| 9  | 2684201   | rs748787   | A | G | 3 | 0.7561  | 0.644  | 1.0293 | 1.1466 | 0.0008 | 85.92 |
| 8  | 109497697 | rs10098022 | A | G | 4 | 0.2056  | 0.6441 | 1.0466 | 1.0401 | 0.0046 | 76.98 |
| 20 | 3504956   | rs17782347 | C | T | 4 | 0.9037  | 0.6443 | 1.0091 | 1.0869 | 0.003  | 78.45 |
| 16 | 29926001  | rs3935873  | C | T | 4 | 0.694   | 0.6447 | 1.0138 | 0.9586 | 0.001  | 81.51 |

|    |           |            |   |   |   |          |        |        |        |        |       |
|----|-----------|------------|---|---|---|----------|--------|--------|--------|--------|-------|
| 2  | 210418651 | rs13028068 | G | T | 4 | 0.004367 | 0.6451 | 1.171  | 1.0577 | 0.0129 | 72.22 |
| 9  | 7517926   | rs10758879 | A | G | 4 | 0.1291   | 0.6452 | 1.0546 | 1.0347 | 0.0155 | 71.12 |
| 2  | 210418038 | rs12386218 | C | G | 4 | 0.004329 | 0.6456 | 0.8538 | 0.9455 | 0.0127 | 72.28 |
| 16 | 29902423  | rs3814883  | C | T | 4 | 0.6173   | 0.6457 | 1.0182 | 0.9561 | 0.0006 | 82.62 |
| 13 | 89120930  | rs6492439  | T | C | 3 | 0.08705  | 0.646  | 1.1951 | 1.1418 | 0.0025 | 83.29 |
| 8  | 109442301 | rs1448160  | C | T | 4 | 0.1989   | 0.6463 | 0.9541 | 0.9621 | 0.0061 | 75.8  |
| 13 | 39465395  | rs276422   | G | T | 4 | 0.9874   | 0.6466 | 1.0005 | 0.961  | 0.002  | 79.76 |
| 7  | 103388421 | rs10246267 | C | T | 4 | 0.3121   | 0.6468 | 1.078  | 1.0896 | 0.0029 | 78.63 |
| 2  | 210417278 | rs16843780 | C | G | 4 | 0.004639 | 0.6472 | 1.1698 | 1.0571 | 0.0133 | 72.03 |
| 4  | 21481084  | rs12504827 | A | G | 4 | 0.9266   | 0.6475 | 1.0032 | 1.0444 | 0.0006 | 82.84 |
| 11 | 62420235  | rs547248   | C | T | 4 | 0.8187   | 0.6477 | 0.9913 | 1.0412 | 0.005  | 76.59 |
| 9  | 81271470  | rs10867388 | A | G | 4 | 0.1104   | 0.6478 | 0.8441 | 0.9071 | 0.0245 | 68.07 |
| 20 | 47381122  | rs6019751  | C | T | 4 | 0.08942  | 0.6482 | 0.8925 | 0.9387 | 0.0195 | 69.68 |
| 13 | 39483845  | rs276402   | A | C | 4 | 0.9744   | 0.6486 | 0.9989 | 0.9608 | 0.0016 | 80.29 |
| 11 | 10857488  | rs11042998 | G | T | 4 | 0.06888  | 0.6487 | 0.9091 | 0.9497 | 0.0098 | 73.65 |
| 11 | 10858797  | rs2403431  | A | C | 4 | 0.06617  | 0.6487 | 0.9087 | 0.9501 | 0.0103 | 73.42 |
| 2  | 210415606 | rs10490024 | A | G | 4 | 0.004699 | 0.649  | 1.1694 | 1.0568 | 0.0131 | 72.11 |
| 11 | 10857160  | rs11042997 | A | C | 4 | 0.07084  | 0.6496 | 0.9093 | 0.9492 | 0.0089 | 74.12 |
| 1  | 160514456 | rs7525955  | A | G | 4 | 0.4608   | 0.6497 | 1.0345 | 1.0619 | 0.0003 | 84.34 |
| 9  | 2663801   | rs12347630 | A | G | 4 | 0.7667   | 0.6514 | 1.0204 | 1.0799 | 0.0019 | 79.89 |
| 1  | 95796000  | rs519693   | C | T | 4 | 0.9715   | 0.6516 | 1.0025 | 1.0761 | 0.0035 | 77.95 |
| 8  | 4101682   | rs12675002 | A | G | 4 | 0.351    | 0.6516 | 1.0676 | 1.0935 | 0.0002 | 84.53 |
| 9  | 2664864   | rs7874073  | A | G | 4 | 0.7338   | 0.6523 | 1.0231 | 1.0821 | 0.001  | 81.49 |
| 16 | 50225366  | rs2647971  | C | T | 4 | 0.6753   | 0.6527 | 0.9852 | 1.0428 | 0.001  | 81.63 |
| 2  | 172973708 | rs10497382 | C | T | 4 | 0.4909   | 0.6529 | 0.9693 | 0.9502 | 0.0021 | 79.55 |
| 2  | 210416012 | rs10188289 | A | G | 4 | 0.004899 | 0.6529 | 1.1685 | 1.0561 | 0.013  | 72.14 |
| 9  | 2664110   | rs7859818  | A | G | 4 | 0.7227   | 0.6534 | 0.9763 | 0.924  | 0.001  | 81.61 |
| 9  | 2673052   | rs7031441  | C | G | 4 | 0.7624   | 0.6538 | 1.0177 | 1.0708 | 0.0008 | 82.16 |
| 8  | 109495470 | rs1955032  | G | T | 4 | 0.203    | 0.654  | 0.9549 | 0.9623 | 0.0045 | 77.04 |
| 7  | 125565214 | rs653569   | A | G | 4 | 0.1098   | 0.6546 | 0.9186 | 0.9522 | 0.0177 | 70.3  |
| 3  | 144994842 | rs2121775  | A | G | 4 | 0.00157  | 0.6548 | 0.8603 | 0.9527 | 0.0078 | 74.73 |
| 3  | 176310661 | rs6782183  | C | T | 4 | 0.9288   | 0.6549 | 0.9968 | 0.9624 | 0.0031 | 78.34 |
| 2  | 38396294  | rs10202238 | C | T | 4 | 0.9251   | 0.6559 | 0.9964 | 0.9598 | 0.0031 | 78.36 |
| 8  | 109493977 | rs6998163  | C | T | 4 | 0.2191   | 0.6564 | 1.0452 | 1.039  | 0.004  | 77.5  |
| 10 | 122502220 | rs11199530 | A | G | 4 | 0.4248   | 0.6564 | 0.9091 | 0.8643 | 0.0007 | 82.24 |
| 9  | 2665728   | rs11793970 | C | G | 4 | 0.7433   | 0.657  | 1.0223 | 1.0807 | 0.0011 | 81.41 |
| 2  | 107931186 | rs7594860  | C | T | 3 | 0.009744 | 0.6572 | 0.8598 | 0.9389 | 0.0205 | 74.28 |

|    |           |            |   |   |   |           |        |        |        |        |       |
|----|-----------|------------|---|---|---|-----------|--------|--------|--------|--------|-------|
| 9  | 2667429   | rs7029840  | A | C | 4 | 0.7498    | 0.6578 | 1.0217 | 1.0802 | 0.0011 | 81.28 |
| 6  | 94772045  | rs1488307  | C | T | 3 | 0.0007852 | 0.658  | 1.1782 | 1.0586 | 0.013  | 76.96 |
| 1  | 152458415 | rs9803857  | A | G | 4 | 0.4633    | 0.6584 | 1.0261 | 0.9554 | 0.0001 | 85.27 |
| 8  | 109492672 | rs4735063  | A | T | 4 | 0.2215    | 0.6586 | 0.9569 | 0.9627 | 0.004  | 77.46 |
| 1  | 160514063 | rs7525777  | C | T | 4 | 0.4414    | 0.6587 | 0.964  | 0.9416 | 0.0003 | 84.34 |
| 4  | 58848803  | rs17089214 | C | T | 4 | 0.03768   | 0.6587 | 0.9234 | 0.9608 | 0.0041 | 77.36 |
| 8  | 4097308   | rs2407941  | C | T | 4 | 0.4218    | 0.659  | 1.0577 | 1.0956 | 0.0001 | 85.89 |
| 8  | 109466087 | rs10108399 | C | T | 4 | 0.1996    | 0.6591 | 0.9549 | 0.9635 | 0.0052 | 76.5  |
| 20 | 47156669  | rs2426133  | C | T | 4 | 0.06467   | 0.6591 | 1.1548 | 1.0685 | 0.031  | 66.19 |
| 16 | 50225696  | rs2647972  | C | T | 4 | 0.6473    | 0.6592 | 0.9839 | 1.0421 | 0.0009 | 81.75 |
| 4  | 71114351  | rs17148361 | C | T | 4 | 0.1423    | 0.6593 | 1.077  | 1.0575 | 0.0021 | 79.64 |
| 5  | 6574824   | rs11742039 | G | T | 4 | 0.6641    | 0.6593 | 0.9803 | 1.0541 | 0.0009 | 81.68 |
| 4  | 21480772  | rs12512316 | A | G | 4 | 0.9346    | 0.6601 | 0.9971 | 0.9587 | 0.0005 | 83.21 |
| 7  | 125565195 | rs651763   | A | C | 4 | 0.116     | 0.6602 | 0.9203 | 0.9529 | 0.0167 | 70.66 |
| 2  | 172438261 | rs6725388  | C | G | 4 | 0.7179    | 0.6603 | 1.0137 | 1.0474 | 0.0003 | 83.91 |
| 8  | 109467321 | rs7812466  | A | G | 4 | 0.2035    | 0.6605 | 1.0469 | 1.0376 | 0.0054 | 76.36 |
| 5  | 51877283  | rs7730948  | C | T | 4 | 0.581     | 0.6608 | 1.062  | 1.1155 | 0.005  | 76.66 |
| 3  | 144995427 | rs6800578  | C | T | 4 | 0.001837  | 0.6612 | 0.862  | 0.9536 | 0.008  | 74.64 |
| 5  | 51883415  | rs10054300 | A | G | 4 | 0.5885    | 0.6624 | 1.0608 | 1.1151 | 0.0049 | 76.69 |
| 9  | 81234777  | rs17082380 | A | C | 4 | 0.1178    | 0.6625 | 0.8478 | 0.9116 | 0.0249 | 67.93 |
| 8  | 109492076 | rs4735062  | G | T | 4 | 0.2262    | 0.6626 | 0.9574 | 0.9631 | 0.0038 | 77.63 |
| 1  | 160514403 | rs7528328  | C | T | 4 | 0.49      | 0.663  | 0.9688 | 0.9436 | 0.0002 | 84.54 |
| 9  | 2667743   | rs7029311  | A | G | 4 | 0.7645    | 0.663  | 1.0204 | 1.0791 | 0.0011 | 81.41 |
| 2  | 38226868  | rs918804   | A | T | 4 | 0.0237    | 0.6634 | 0.8924 | 0.9487 | 0.0039 | 77.54 |
| 5  | 51871156  | rs16879891 | G | T | 4 | 0.6019    | 0.6645 | 0.945  | 0.8986 | 0.0054 | 76.35 |
| 8  | 109471830 | rs4363174  | C | T | 4 | 0.2078    | 0.6647 | 1.0464 | 1.0372 | 0.0051 | 76.53 |
| 3  | 178815700 | rs1466846  | A | G | 4 | 0.02615   | 0.665  | 0.9104 | 0.9488 | 0.0002 | 84.96 |
| 2  | 49146315  | rs4971622  | A | T | 4 | 0.9595    | 0.6651 | 0.9955 | 0.9155 | 0.0049 | 76.7  |
| 5  | 6575043   | rs11134164 | A | G | 4 | 0.6778    | 0.6654 | 1.0193 | 0.9495 | 0.001  | 81.65 |
| 5  | 73297869  | rs416286   | A | G | 4 | 0.01807   | 0.6659 | 1.0965 | 1.05   | 0.0002 | 84.72 |
| 5  | 73300336  | rs436777   | A | G | 4 | 0.01807   | 0.6659 | 1.0965 | 1.05   | 0.0002 | 84.72 |
| 13 | 104286376 | rs2031635  | A | G | 4 | 0.8754    | 0.6679 | 0.9941 | 1.0411 | 0.0022 | 79.49 |
| 16 | 29874935  | rs4788196  | A | G | 4 | 0.6848    | 0.6679 | 1.0143 | 0.9649 | 0.0042 | 77.26 |
| 8  | 109477725 | rs2156740  | C | G | 4 | 0.2125    | 0.6692 | 1.0459 | 1.0368 | 0.0049 | 76.73 |
| 1  | 152478140 | rs12062977 | C | T | 4 | 0.4803    | 0.6698 | 0.9756 | 1.0451 | 0.0001 | 85.34 |
| 1  | 152486342 | rs6427509  | C | T | 4 | 0.476     | 0.6715 | 0.9753 | 1.0449 | 0.0001 | 85.36 |
| 1  | 152484387 | rs10158820 | C | T | 4 | 0.4738    | 0.6718 | 0.9752 | 1.0448 | 0.0001 | 85.36 |

|    |           |            |   |   |   |          |        |        |        |        |       |
|----|-----------|------------|---|---|---|----------|--------|--------|--------|--------|-------|
| 5  | 159144339 | rs6888211  | C | T | 4 | 0.8731   | 0.6725 | 0.9761 | 0.8663 | 0.0047 | 76.89 |
| 4  | 174752942 | rs10025532 | A | G | 4 | 0.2456   | 0.6729 | 0.9561 | 0.9594 | 0.0014 | 80.7  |
| 20 | 47380876  | rs6019750  | C | G | 4 | 0.0997   | 0.6732 | 0.8956 | 0.9422 | 0.0165 | 70.77 |
| 1  | 152491968 | rs2340473  | C | T | 4 | 0.4711   | 0.6735 | 1.0256 | 0.9573 | 0.0001 | 85.4  |
| 2  | 134738836 | rs3791270  | A | G | 4 | 0.04575  | 0.6737 | 0.8364 | 0.9167 | 0.0109 | 73.11 |
| 9  | 81234189  | rs11138206 | A | G | 4 | 0.1233   | 0.6738 | 1.1767 | 1.0941 | 0.0232 | 68.45 |
| 1  | 152470934 | rs2879788  | A | T | 4 | 0.4632   | 0.6743 | 0.9746 | 1.0445 | 0.0001 | 85.39 |
| 1  | 202857860 | rs884108   | A | G | 3 | 0.01364  | 0.6757 | 1.115  | 1.0456 | 0.0082 | 79.18 |
| 7  | 52131614  | rs2953422  | A | G | 4 | 0.1005   | 0.6758 | 0.9434 | 0.9646 | 0.0028 | 78.7  |
| 1  | 170633760 | rs4471302  | C | T | 4 | 0.6872   | 0.676  | 1.0201 | 0.9499 | 0.0032 | 78.24 |
| 2  | 210443331 | rs12328346 | A | G | 4 | 0.007564 | 0.6762 | 1.1593 | 1.0538 | 0.0098 | 73.65 |
| 9  | 2668077   | rs6475927  | A | G | 4 | 0.7912   | 0.6769 | 1.018  | 1.0763 | 0.001  | 81.66 |
| 13 | 67660291  | rs17083164 | C | T | 3 | 0.0656   | 0.6772 | 1.3088 | 0.8063 | 0.0008 | 86.08 |
| 9  | 81273412  | rs12339463 | A | G | 4 | 0.1243   | 0.6773 | 1.1772 | 1.0946 | 0.0211 | 69.14 |
| 8  | 109479131 | rs1893887  | C | G | 4 | 0.2216   | 0.6775 | 1.045  | 1.0361 | 0.0045 | 77.08 |
| 8  | 109479249 | rs1893886  | C | T | 4 | 0.223    | 0.6778 | 0.9571 | 0.9652 | 0.0045 | 77.02 |
| 3  | 176301721 | rs7627996  | C | T | 4 | 0.5434   | 0.6779 | 0.9787 | 1.0372 | 0.0023 | 79.29 |
| 13 | 67662316  | rs7984473  | A | G | 3 | 0.1201   | 0.678  | 1.2896 | 0.7941 | 0.0007 | 86.14 |
| 1  | 170633685 | rs10489284 | A | G | 4 | 0.681    | 0.6786 | 0.9799 | 1.0523 | 0.0032 | 78.21 |
| 1  | 152446303 | rs6719     | C | T | 4 | 0.4334   | 0.6787 | 1.0279 | 0.9579 | 0.0001 | 85.43 |
| 8  | 109479507 | rs2156739  | A | C | 4 | 0.2255   | 0.6787 | 1.0446 | 1.0358 | 0.0046 | 76.94 |
| 8  | 3078201   | rs2406453  | C | G | 4 | 0.9812   | 0.6788 | 1.002  | 1.0929 | 0.0013 | 80.95 |
| 13 | 104282823 | rs9514322  | C | T | 4 | 0.7478   | 0.6788 | 1.012  | 0.9606 | 0.001  | 81.67 |
| 10 | 122646633 | rs12355611 | A | C | 4 | 0.4672   | 0.6791 | 0.9131 | 0.8621 | 0.0005 | 82.91 |
| 9  | 81261735  | rs11138238 | C | T | 4 | 0.1265   | 0.6794 | 0.8503 | 0.915  | 0.0228 | 68.59 |
| 9  | 81266134  | rs11138240 | C | T | 4 | 0.125    | 0.6797 | 0.8497 | 0.9148 | 0.0223 | 68.76 |
| 9  | 2668427   | rs7847455  | A | T | 4 | 0.7988   | 0.68   | 0.9829 | 0.9297 | 0.0009 | 81.73 |
| 16 | 7437703   | rs9933246  | C | T | 4 | 0.5481   | 0.6811 | 1.0211 | 0.9637 | 0.0013 | 80.92 |
| 9  | 7517298   | rs4269591  | C | T | 4 | 0.1501   | 0.6812 | 0.9504 | 0.9695 | 0.0142 | 71.66 |
| 10 | 122678184 | rs12359177 | A | G | 4 | 0.526    | 0.6812 | 1.0828 | 1.1565 | 0.0007 | 82.32 |
| 9  | 2667787   | rs7046015  | A | G | 4 | 0.8038   | 0.6817 | 0.9834 | 0.93   | 0.0009 | 81.77 |
| 9  | 81214260  | rs11138196 | A | T | 4 | 0.1257   | 0.6817 | 1.174  | 1.0935 | 0.0184 | 70.06 |
| 9  | 81239935  | rs12352718 | C | T | 4 | 0.1318   | 0.6817 | 0.8526 | 0.9157 | 0.0227 | 68.61 |
| 9  | 2668059   | rs6475926  | C | T | 4 | 0.8061   | 0.682  | 1.0167 | 1.0752 | 0.0009 | 81.79 |
| 10 | 122678943 | rs11199659 | A | T | 4 | 0.5151   | 0.682  | 1.0851 | 1.1562 | 0.0007 | 82.36 |
| 2  | 210447598 | rs1558474  | C | T | 4 | 0.008574 | 0.6822 | 0.864  | 0.95   | 0.0105 | 73.29 |
| 8  | 109481042 | rs1955025  | A | C | 4 | 0.2302   | 0.6828 | 1.0441 | 1.0355 | 0.0044 | 77.11 |

|    |           |            |   |   |   |          |        |        |        |        |       |
|----|-----------|------------|---|---|---|----------|--------|--------|--------|--------|-------|
| 8  | 109483397 | rs2023107  | A | C | 4 | 0.2302   | 0.6828 | 1.0441 | 1.0355 | 0.0044 | 77.11 |
| 5  | 73293142  | rs1684851  | A | C | 4 | 0.02088  | 0.6836 | 1.0942 | 1.047  | 0.0002 | 84.65 |
| 7  | 136927210 | rs706562   | C | G | 4 | 0.06624  | 0.6839 | 1.173  | 1.086  | 0.0041 | 77.37 |
| 2  | 172832483 | rs7574225  | A | G | 4 | 0.01005  | 0.6843 | 0.9105 | 0.9587 | 0.0003 | 84.25 |
| 10 | 122645462 | rs11199632 | C | T | 4 | 0.4806   | 0.6847 | 0.9156 | 0.8638 | 0.0005 | 83.07 |
| 16 | 7435187   | rs2346943  | G | T | 4 | 0.5951   | 0.6853 | 1.0188 | 0.9636 | 0.0011 | 81.32 |
| 10 | 122679402 | rs11199660 | A | G | 4 | 0.5263   | 0.6854 | 1.0827 | 1.1546 | 0.0007 | 82.41 |
| 13 | 39454859  | rs276429   | A | G | 4 | 0.8664   | 0.6854 | 1.0059 | 0.9651 | 0.0021 | 79.59 |
| 10 | 122623411 | rs12355108 | C | T | 4 | 0.4829   | 0.6857 | 0.916  | 0.8639 | 0.0005 | 83.18 |
| 16 | 7340883   | rs17842417 | C | T | 4 | 0.01352  | 0.6868 | 1.1507 | 1.0521 | 0.0109 | 73.14 |
| 20 | 3489382   | rs17782078 | C | T | 4 | 0.9613   | 0.6868 | 0.9964 | 1.0783 | 0.002  | 79.74 |
| 4  | 71142292  | rs4460073  | C | T | 4 | 0.04589  | 0.687  | 0.8891 | 0.9422 | 0.002  | 79.78 |
| 10 | 122624977 | rs12355961 | A | G | 4 | 0.4867   | 0.6871 | 1.0909 | 1.1567 | 0.0005 | 83.17 |
| 10 | 122607331 | rs11199603 | A | G | 4 | 0.4855   | 0.6873 | 0.9165 | 0.8642 | 0.0005 | 83.27 |
| 2  | 210450278 | rs11682914 | A | G | 4 | 0.008441 | 0.6876 | 1.1577 | 1.0518 | 0.0102 | 73.48 |
| 8  | 109484593 | rs2023104  | A | G | 4 | 0.2382   | 0.6876 | 1.0434 | 1.0352 | 0.004  | 77.45 |
| 10 | 122622408 | rs11199613 | C | T | 4 | 0.4878   | 0.6877 | 1.0906 | 1.1565 | 0.0005 | 83.19 |
| 10 | 122680429 | rs12357022 | A | G | 4 | 0.5374   | 0.6895 | 0.9256 | 0.8678 | 0.0007 | 82.42 |
| 8  | 109476961 | rs13281088 | C | T | 4 | 0.2358   | 0.6897 | 1.0436 | 1.035  | 0.0039 | 77.59 |
| 2  | 134738884 | rs3791271  | C | T | 4 | 0.04806  | 0.69   | 1.1935 | 1.0861 | 0.0108 | 73.16 |
| 9  | 81242882  | rs1340123  | C | T | 4 | 0.1357   | 0.6906 | 1.1711 | 1.0898 | 0.0215 | 69.01 |
| 20 | 47379153  | rs1847326  | A | C | 4 | 0.1013   | 0.6909 | 1.117  | 1.0599 | 0.0123 | 72.47 |
| 2  | 210442080 | rs7593426  | A | G | 4 | 0.007233 | 0.6913 | 1.1592 | 1.0516 | 0.0086 | 74.32 |
| 10 | 122682094 | rs11199663 | A | G | 4 | 0.5428   | 0.6913 | 1.0793 | 1.1511 | 0.0007 | 82.38 |
| 10 | 122679558 | rs11199661 | A | G | 4 | 0.5418   | 0.6914 | 1.0795 | 1.1513 | 0.0007 | 82.43 |
| 2  | 172832429 | rs7574002  | C | T | 4 | 0.01116  | 0.6917 | 1.0968 | 1.042  | 0.0003 | 84.27 |
| 7  | 6389871   | rs10238136 | A | T | 4 | 0.6636   | 0.692  | 1.0421 | 0.899  | 0.0002 | 85.06 |
| 3  | 178795570 | rs4857716  | C | T | 4 | 0.05855  | 0.6929 | 0.9337 | 0.9609 | 0.0003 | 83.8  |
| 2  | 210423419 | rs10194322 | A | G | 4 | 0.009558 | 0.6932 | 1.1497 | 1.0513 | 0.0071 | 75.18 |
| 3  | 134947186 | rs8177184  | A | G | 4 | 0.1837   | 0.6935 | 0.9389 | 0.9595 | 0.0083 | 74.48 |
| 2  | 210441690 | rs10490026 | A | G | 4 | 0.01174  | 0.6937 | 1.1487 | 1.0492 | 0.0126 | 72.31 |
| 2  | 210444633 | rs12328884 | C | T | 4 | 0.008969 | 0.6937 | 1.1564 | 1.051  | 0.0096 | 73.76 |
| 2  | 134733887 | rs16830280 | A | T | 4 | 0.01903  | 0.694  | 0.8302 | 0.9231 | 0.0025 | 79.02 |
| 10 | 122621095 | rs11199612 | C | T | 4 | 0.5045   | 0.6947 | 0.9199 | 0.8675 | 0.0005 | 83.25 |
| 1  | 95634310  | rs17113478 | C | G | 4 | 0.8624   | 0.6953 | 0.9887 | 0.9361 | 0.0011 | 81.34 |
| 2  | 210447119 | rs17748692 | C | T | 4 | 0.00918  | 0.6955 | 1.1558 | 1.0506 | 0.0097 | 73.7  |
| 2  | 210443405 | rs10490028 | C | T | 4 | 0.008998 | 0.6957 | 0.8654 | 0.9519 | 0.0093 | 73.89 |



|    |           |            |   |   |   |          |        |        |        |        |       |
|----|-----------|------------|---|---|---|----------|--------|--------|--------|--------|-------|
| 8  | 109488103 | rs13275153 | C | T | 4 | 0.2482   | 0.6957 | 1.0425 | 1.0344 | 0.0037 | 77.79 |
| 13 | 89117527  | rs2148775  | C | T | 4 | 0.582    | 0.6964 | 1.0423 | 1.0702 | 0.0042 | 77.28 |
| 10 | 122688268 | rs12355094 | C | T | 4 | 0.55     | 0.6968 | 0.9278 | 0.8717 | 0.0007 | 82.25 |
| 8  | 109459433 | rs2023100  | G | T | 4 | 0.2412   | 0.6969 | 1.0431 | 1.0347 | 0.0031 | 78.31 |
| 2  | 210444857 | rs12329303 | A | G | 4 | 0.009278 | 0.697  | 0.8653 | 0.952  | 0.0096 | 73.76 |
| 2  | 210446076 | rs7581628  | A | G | 4 | 0.009278 | 0.697  | 0.8653 | 0.952  | 0.0096 | 73.76 |
| 2  | 210446334 | rs7581974  | A | G | 4 | 0.009278 | 0.697  | 0.8653 | 0.952  | 0.0096 | 73.76 |
| 1  | 115209396 | rs12741053 | C | T | 4 | 0.8917   | 0.6976 | 1.0071 | 1.0493 | 0.0035 | 77.99 |
| 1  | 214171603 | rs498911   | A | C | 4 | 0.4916   | 0.698  | 0.9675 | 1.0545 | 0.0002 | 85.05 |
| 2  | 210447096 | rs17748674 | C | T | 4 | 0.009361 | 0.6982 | 1.1554 | 1.0502 | 0.0096 | 73.76 |
| 11 | 18884861  | rs6483549  | C | G | 4 | 0.03434  | 0.6983 | 0.8845 | 0.9485 | 0.0054 | 76.35 |
| 3  | 54723274  | rs604132   | A | T | 4 | 0.2026   | 0.6992 | 0.954  | 0.9649 | 0.0018 | 80.1  |
| 7  | 17412231  | rs10259316 | G | T | 4 | 0.802    | 0.6996 | 1.0095 | 0.9605 | 0.0004 | 83.48 |
| 1  | 95798397  | rs12125905 | C | G | 4 | 0.9837   | 0.6998 | 1.0014 | 0.9386 | 0.0044 | 77.14 |
| 4  | 1663729   | rs3958122  | C | T | 4 | 0.002199 | 0.7004 | 0.8923 | 0.9671 | 0.0051 | 76.59 |
| 3  | 18167244  | rs13071948 | A | G | 4 | 0.7056   | 0.7007 | 1.0198 | 0.9527 | 0.0025 | 79.1  |
| 2  | 107970060 | rs333238   | A | G | 4 | 0.1069   | 0.7022 | 0.9298 | 0.9599 | 0.0037 | 77.73 |
| 2  | 107970399 | rs333236   | A | G | 4 | 0.1074   | 0.7022 | 1.0753 | 1.0417 | 0.0038 | 77.69 |
| 1  | 55443484  | rs6671533  | C | G | 4 | 0.02706  | 0.7023 | 1.1044 | 1.0362 | 0.0194 | 69.71 |
| 2  | 210444413 | rs12328869 | A | T | 4 | 0.009084 | 0.7026 | 1.1575 | 1.0497 | 0.0096 | 73.74 |
| 1  | 21829826  | rs9426674  | C | G | 4 | 0.09071  | 0.7029 | 0.9401 | 0.9702 | 0.0108 | 73.19 |
| 10 | 122593274 | rs11199590 | C | T | 4 | 0.4701   | 0.7031 | 1.0939 | 1.152  | 0.0003 | 84.14 |
| 3  | 129060018 | rs7633928  | A | G | 4 | 0.01072  | 0.7032 | 0.8788 | 0.959  | 0.0125 | 72.39 |
| 18 | 6396648   | rs9947555  | C | T | 4 | 0.1237   | 0.7038 | 0.9418 | 0.9682 | 0.0097 | 73.7  |
| 4  | 58861907  | rs13148519 | A | G | 4 | 0.04479  | 0.7048 | 0.9259 | 0.9654 | 0.003  | 78.41 |
| 3  | 134946488 | rs8177181  | A | T | 4 | 0.1947   | 0.7049 | 1.0634 | 1.0407 | 0.008  | 74.64 |
| 8  | 135168960 | rs1457463  | A | G | 4 | 0.02911  | 0.7056 | 0.9267 | 0.9657 | 0.0008 | 81.95 |
| 6  | 26862629  | rs2504586  | C | G | 4 | 0.8989   | 0.7067 | 0.9945 | 1.0402 | 0.0028 | 78.66 |
| 2  | 210441645 | rs10490025 | A | T | 4 | 0.01335  | 0.7069 | 0.8727 | 0.9549 | 0.012  | 72.58 |
| 8  | 135163085 | rs7842645  | A | G | 4 | 0.0835   | 0.7071 | 1.0622 | 1.0311 | 0.005  | 76.62 |
| 3  | 178798779 | rs4241484  | A | C | 4 | 0.05414  | 0.7074 | 1.0717 | 1.0384 | 0.0003 | 83.9  |
| 2  | 210449837 | rs16843893 | C | T | 4 | 0.009934 | 0.7076 | 0.8665 | 0.9537 | 0.0095 | 73.83 |
| 10 | 110503646 | rs12258219 | G | T | 4 | 0.05519  | 0.7077 | 1.0966 | 1.0373 | 0.019  | 69.85 |
| 1  | 21828331  | rs9426770  | C | G | 4 | 0.0893   | 0.7081 | 0.9399 | 0.9705 | 0.01   | 73.54 |
| 4  | 1671115   | rs2247341  | A | G | 4 | 0.002113 | 0.7085 | 1.1202 | 1.033  | 0.0047 | 76.89 |
| 3  | 24666496  | rs4131483  | A | T | 4 | 0.07181  | 0.7088 | 1.0649 | 1.0285 | 0.0124 | 72.45 |
| 1  | 95798313  | rs12125877 | C | G | 4 | 0.9449   | 0.7089 | 1.0049 | 0.9404 | 0.0039 | 77.53 |

|    |           |            |   |   |   |         |        |        |        |        |       |
|----|-----------|------------|---|---|---|---------|--------|--------|--------|--------|-------|
| 1  | 95633790  | rs11586346 | A | C | 4 | 0.9167  | 0.7093 | 0.9932 | 0.9388 | 0.001  | 81.49 |
| 11 | 18884296  | rs2896547  | A | G | 4 | 0.0382  | 0.7094 | 1.1277 | 1.0524 | 0.0051 | 76.56 |
| 4  | 58860984  | rs7690084  | A | G | 4 | 0.04704 | 0.7109 | 0.9266 | 0.9661 | 0.0029 | 78.54 |
| 12 | 128857653 | rs11060565 | C | T | 4 | 0.0955  | 0.7109 | 1.0801 | 1.0479 | 0.0005 | 83.04 |
| 3  | 102219726 | rs13085823 | G | T | 4 | 0.8238  | 0.7112 | 1.0083 | 0.9665 | 0.0024 | 79.17 |
| 1  | 95792027  | rs1355136  | C | T | 4 | 0.9349  | 0.7119 | 1.0056 | 0.9403 | 0.0025 | 79.06 |
| 4  | 58866253  | rs11945898 | C | T | 4 | 0.04723 | 0.7119 | 1.0791 | 1.035  | 0.0029 | 78.55 |
| 2  | 210440931 | rs13414802 | A | G | 4 | 0.01308 | 0.7122 | 0.8728 | 0.9558 | 0.0117 | 72.75 |
| 7  | 52130392  | rs2952763  | C | T | 4 | 0.1532  | 0.713  | 0.9518 | 0.97   | 0.0035 | 77.94 |
| 1  | 21831326  | rs9426771  | G | T | 4 | 0.05169 | 0.7136 | 1.073  | 1.0288 | 0.0133 | 72.03 |
| 12 | 9918211   | rs10219684 | C | T | 4 | 0.587   | 0.7138 | 1.0213 | 0.9634 | 0.001  | 81.44 |
| 11 | 80656128  | rs17141842 | C | T | 4 | 0.6446  | 0.714  | 0.9659 | 0.9216 | 0.0001 | 86.45 |
| 2  | 210443088 | rs12328328 | C | T | 4 | 0.01011 | 0.7143 | 0.8673 | 0.9544 | 0.0083 | 74.45 |
| 11 | 18886008  | rs1384648  | C | T | 4 | 0.03969 | 0.715  | 0.8875 | 0.9509 | 0.0047 | 76.9  |
| 2  | 29141970  | rs13012389 | C | T | 4 | 0.1663  | 0.7153 | 1.0583 | 1.0317 | 0.0172 | 70.49 |
| 2  | 29141985  | rs13031086 | C | T | 4 | 0.1494  | 0.7153 | 0.9431 | 0.9691 | 0.0156 | 71.08 |
| 1  | 206126982 | rs2556     | A | G | 4 | 0.08605 | 0.7155 | 0.8951 | 0.9477 | 0.0065 | 75.53 |
| 8  | 4109411   | rs9693235  | A | G | 4 | 0.6134  | 0.7157 | 1.0369 | 1.0717 | 0.0008 | 82.08 |
| 4  | 58866156  | rs11933359 | C | T | 4 | 0.04843 | 0.7159 | 0.9271 | 0.9666 | 0.0028 | 78.65 |
| 5  | 104120449 | rs12518236 | A | G | 4 | 0.1504  | 0.7165 | 1.0806 | 1.0517 | 0.0011 | 81.4  |
| 4  | 71084769  | rs17148325 | C | T | 3 | 0.2076  | 0.7166 | 1.0696 | 1.0528 | 0.0027 | 83.06 |
| 2  | 210781793 | rs1509571  | C | T | 4 | 0.01043 | 0.7169 | 1.1577 | 1.0491 | 0.0085 | 74.33 |
| 11 | 18898424  | rs2403354  | C | T | 4 | 0.04465 | 0.7169 | 1.1262 | 1.0517 | 0.0054 | 76.33 |
| 2  | 172835915 | rs7588418  | C | T | 4 | 0.0114  | 0.7184 | 1.0975 | 1.0392 | 0.0002 | 84.86 |
| 2  | 210443100 | rs12329111 | A | C | 4 | 0.01036 | 0.7186 | 0.8677 | 0.9551 | 0.0082 | 74.53 |
| 1  | 95798178  | rs12145270 | A | T | 4 | 0.8961  | 0.7189 | 0.991  | 1.0609 | 0.0038 | 77.69 |
| 9  | 2668958   | rs16909038 | C | G | 4 | 0.8409  | 0.7191 | 0.9865 | 0.9377 | 0.0008 | 82.18 |
| 11 | 18888602  | rs1973238  | C | G | 4 | 0.03958 | 0.7191 | 0.887  | 0.9514 | 0.0047 | 76.91 |
| 3  | 178804169 | rs11716881 | A | G | 4 | 0.06011 | 0.7194 | 1.0699 | 1.0369 | 0.0003 | 84.02 |
| 4  | 58862866  | rs2412887  | A | G | 4 | 0.04969 | 0.72   | 1.0782 | 1.0342 | 0.0027 | 78.84 |
| 4  | 183404530 | rs6552548  | A | C | 3 | 0.1483  | 0.7204 | 1.0585 | 1.0393 | 0.0023 | 83.58 |
| 21 | 16553299  | rs1389074  | C | T | 3 | 0.1435  | 0.7206 | 0.9474 | 0.9636 | 0.0013 | 84.87 |
| 4  | 58863520  | rs2140072  | A | G | 4 | 0.05078 | 0.721  | 1.0778 | 1.034  | 0.0028 | 78.74 |
| 1  | 115298685 | rs2008873  | A | T | 4 | 0.9161  | 0.7213 | 1.0055 | 1.046  | 0.0028 | 78.74 |
| 3  | 129059205 | rs6763775  | C | G | 4 | 0.01308 | 0.7216 | 0.8812 | 0.9611 | 0.0115 | 72.83 |
| 13 | 23529796  | rs9511023  | A | G | 4 | 0.16    | 0.7217 | 1.0585 | 1.0301 | 0.0195 | 69.69 |
| 1  | 21826881  | rs4654974  | C | T | 4 | 0.1025  | 0.7226 | 0.9422 | 0.9717 | 0.0086 | 74.32 |

|    |           |            |   |   |   |          |        |        |        |        |       |
|----|-----------|------------|---|---|---|----------|--------|--------|--------|--------|-------|
| 1  | 98737106  | rs591545   | C | T | 4 | 0.2943   | 0.7232 | 0.9294 | 0.9421 | 0.0036 | 77.81 |
| 3  | 178805561 | rs6766914  | C | T | 4 | 0.05818  | 0.7232 | 1.0693 | 1.036  | 0.0003 | 84.1  |
| 8  | 4095458   | rs6998882  | A | C | 4 | 0.5968   | 0.7241 | 0.9611 | 0.922  | 0      | 86.91 |
| 2  | 197755262 | rs2697234  | C | T | 4 | 0.2176   | 0.7248 | 0.8861 | 0.9223 | 0.0033 | 78.19 |
| 2  | 197754509 | rs2697235  | A | G | 4 | 0.2172   | 0.725  | 1.1287 | 1.0844 | 0.0032 | 78.26 |
| 4  | 1689418   | rs743569   | G | T | 4 | 0.003078 | 0.7256 | 1.1165 | 1.0312 | 0.0046 | 76.98 |
| 2  | 197753891 | rs2697236  | C | G | 4 | 0.2188   | 0.7258 | 0.8864 | 0.9225 | 0.0032 | 78.22 |
| 2  | 210442197 | rs7566741  | A | G | 4 | 0.01027  | 0.7258 | 0.8676 | 0.956  | 0.0076 | 74.86 |
| 2  | 38221238  | rs2113389  | C | T | 4 | 0.03829  | 0.7275 | 0.9025 | 0.9574 | 0.0021 | 79.54 |
| 2  | 107974450 | rs2450280  | C | T | 4 | 0.1188   | 0.7281 | 1.0739 | 1.0384 | 0.0036 | 77.82 |
| 2  | 210450498 | rs2109970  | A | G | 4 | 0.01143  | 0.7281 | 0.8688 | 0.9567 | 0.0087 | 74.25 |
| 12 | 128850548 | rs1376797  | C | T | 4 | 0.1123   | 0.7285 | 1.0762 | 1.044  | 0.0007 | 82.35 |
| 4  | 52565714  | rs2319750  | C | T | 4 | 0.7257   | 0.7288 | 1.0175 | 0.9543 | 0.0007 | 82.34 |
| 8  | 4108928   | rs17069778 | A | T | 4 | 0.6357   | 0.7305 | 0.967  | 0.9383 | 0.001  | 81.44 |
| 2  | 210413138 | rs10178425 | G | T | 4 | 0.00656  | 0.7317 | 0.8591 | 0.9576 | 0.01   | 73.58 |
| 14 | 94392551  | rs10133971 | T | C | 3 | 0.1257   | 0.7317 | 1.1642 | 1.1206 | 0.0012 | 85.19 |
| 4  | 58871935  | rs1402960  | A | G | 4 | 0.05793  | 0.7321 | 0.9298 | 0.9685 | 0.0029 | 78.62 |
| 5  | 51859304  | rs16879856 | C | T | 4 | 0.7385   | 0.7322 | 0.9644 | 0.9159 | 0.0033 | 78.16 |
| 2  | 210442707 | rs10490027 | A | T | 4 | 0.01086  | 0.7326 | 1.1521 | 1.045  | 0.0076 | 74.87 |
| 13 | 45873366  | rs7333428  | C | T | 4 | 0.864    | 0.7328 | 0.9905 | 1.0479 | 0.003  | 78.47 |
| 3  | 45188375  | rs9850250  | A | T | 4 | 0.2075   | 0.7331 | 0.9561 | 0.9715 | 0.0039 | 77.61 |
| 1  | 154341469 | rs6661281  | C | T | 4 | 0.1631   | 0.7335 | 1.0521 | 1.0292 | 0.0058 | 76.01 |
| 2  | 210412445 | rs9288414  | A | C | 4 | 0.006078 | 0.7335 | 1.1674 | 1.0445 | 0.0092 | 73.96 |
| 8  | 4107562   | rs1394485  | C | T | 4 | 0.613    | 0.7347 | 0.9646 | 0.9384 | 0.0009 | 81.76 |
| 12 | 2205194   | rs7296039  | C | G | 4 | 0.4791   | 0.7349 | 1.076  | 0.9121 | 0.0017 | 80.27 |
| 2  | 107973532 | rs333235   | C | T | 4 | 0.1112   | 0.7358 | 0.9303 | 0.9639 | 0.0032 | 78.28 |
| 8  | 4095738   | rs971555   | A | G | 4 | 0.6415   | 0.736  | 0.9657 | 0.9249 | 0      | 87.1  |
| 4  | 58909359  | rs11133559 | A | C | 4 | 0.08996  | 0.7362 | 0.9359 | 0.9691 | 0.0037 | 77.73 |
| 12 | 93474128  | rs7955502  | A | C | 4 | 0.1773   | 0.7372 | 1.0776 | 1.042  | 0.0087 | 74.24 |
| 7  | 52985234  | rs4947759  | A | G | 4 | 0.5656   | 0.7386 | 0.9716 | 1.046  | 0.0008 | 81.96 |
| 4  | 58878691  | rs9312697  | A | G | 4 | 0.08658  | 0.7395 | 1.068  | 1.03   | 0.0054 | 76.33 |
| 4  | 58908862  | rs12511263 | A | G | 4 | 0.09352  | 0.7404 | 0.9366 | 0.9696 | 0.0036 | 77.82 |
| 4  | 58908498  | rs4865328  | C | T | 4 | 0.09455  | 0.7415 | 1.0674 | 1.0312 | 0.0037 | 77.78 |
| 2  | 210842791 | rs4558528  | A | T | 4 | 0.02039  | 0.7428 | 1.1434 | 1.0444 | 0.009  | 74.09 |
| 4  | 58908183  | rs10517438 | A | T | 4 | 0.09756  | 0.7431 | 1.0668 | 1.0311 | 0.0035 | 77.96 |
| 2  | 210437956 | rs7598071  | C | G | 4 | 0.0126   | 0.7435 | 1.1472 | 1.0427 | 0.0078 | 74.73 |
| 8  | 4089879   | rs7838274  | A | T | 4 | 0.653    | 0.7436 | 0.9618 | 0.9192 | 0.0001 | 86.06 |

|    |           |            |   |   |   |          |        |        |        |        |       |
|----|-----------|------------|---|---|---|----------|--------|--------|--------|--------|-------|
| 3  | 58047511  | rs13315037 | G | T | 4 | 0.05256  | 0.7441 | 0.876  | 0.9503 | 0.0051 | 76.56 |
| 4  | 58906382  | rs2090901  | C | T | 4 | 0.0984   | 0.7446 | 1.0666 | 1.0304 | 0.0042 | 77.25 |
| 2  | 71088630  | rs10188275 | C | T | 4 | 0.5851   | 0.7449 | 0.9588 | 1.087  | 0      | 89.37 |
| 4  | 58903429  | rs11735710 | A | G | 4 | 0.09578  | 0.7451 | 0.9376 | 0.9711 | 0.0049 | 76.71 |
| 2  | 210844923 | rs1396831  | A | T | 4 | 0.02193  | 0.7454 | 1.1402 | 1.0438 | 0.0085 | 74.35 |
| 4  | 58904343  | rs17218140 | G | T | 4 | 0.09584  | 0.7454 | 1.0666 | 1.0297 | 0.0049 | 76.71 |
| 2  | 197749763 | rs2697239  | C | T | 4 | 0.2502   | 0.7455 | 0.8936 | 0.9242 | 0.0014 | 80.63 |
| 1  | 223940235 | rs2615060  | A | C | 4 | 0.08937  | 0.7459 | 1.0729 | 1.0305 | 0.0099 | 73.59 |
| 12 | 2203913   | rs11062164 | A | C | 4 | 0.4858   | 0.746  | 1.075  | 0.9152 | 0.0015 | 80.48 |
| 1  | 95774113  | rs1509178  | C | T | 4 | 0.9416   | 0.7462 | 0.9952 | 1.054  | 0.0021 | 79.62 |
| 4  | 1690348   | rs2854917  | C | T | 4 | 0.003885 | 0.7462 | 1.1135 | 1.0288 | 0.0044 | 77.09 |
| 4  | 58906337  | rs2090900  | A | C | 4 | 0.1003   | 0.7463 | 0.9379 | 0.9708 | 0.0044 | 77.16 |
| 12 | 9923537   | rs935537   | C | G | 4 | 0.3566   | 0.7471 | 0.9656 | 1.0324 | 0.0012 | 81.15 |
| 4  | 58880555  | rs11133555 | A | G | 4 | 0.09068  | 0.7472 | 1.0671 | 1.0292 | 0.0052 | 76.48 |
| 4  | 58905977  | rs12648092 | A | G | 4 | 0.09064  | 0.7474 | 0.9366 | 0.9709 | 0.0041 | 77.4  |
| 1  | 98737348  | rs3867319  | A | G | 4 | 0.2798   | 0.7475 | 0.9295 | 0.9513 | 0.0069 | 75.27 |
| 2  | 210423552 | rs10194333 | A | C | 4 | 0.01368  | 0.7479 | 1.1443 | 1.0427 | 0.006  | 75.9  |
| 16 | 7338996   | rs9924010  | A | G | 4 | 0.02998  | 0.7482 | 1.1293 | 1.0418 | 0.008  | 74.66 |
| 4  | 58903846  | rs11727794 | A | C | 4 | 0.09784  | 0.7483 | 0.938  | 0.9714 | 0.0048 | 76.78 |
| 4  | 58905626  | rs12647365 | A | G | 4 | 0.09553  | 0.7487 | 0.9375 | 0.9713 | 0.0045 | 77.01 |
| 4  | 58905886  | rs12648067 | A | G | 4 | 0.09327  | 0.749  | 0.9371 | 0.9712 | 0.0043 | 77.23 |
| 4  | 58905741  | rs12641535 | C | T | 4 | 0.09491  | 0.7495 | 1.0668 | 1.0295 | 0.0044 | 77.11 |
| 12 | 2204109   | rs11062165 | C | T | 4 | 0.4834   | 0.7501 | 1.0752 | 0.917  | 0.0016 | 80.35 |
| 4  | 3505974   | rs2073503  | C | G | 4 | 0.07667  | 0.7503 | 1.0697 | 1.0265 | 0.0119 | 72.64 |
| 11 | 103266219 | rs11601578 | C | T | 4 | 0.2944   | 0.7507 | 1.0409 | 1.0336 | 0.0005 | 82.91 |
| 1  | 166081092 | rs204262   | A | G | 4 | 0.08687  | 0.7519 | 1.074  | 1.0332 | 0.0024 | 79.23 |
| 1  | 152423714 | rs11265251 | C | T | 4 | 0.5438   | 0.7525 | 1.0223 | 0.9681 | 0.0003 | 84.27 |
| 8  | 4112508   | rs17069790 | A | G | 4 | 0.6707   | 0.7529 | 1.0315 | 1.0615 | 0.0011 | 81.33 |
| 2  | 172559748 | rs6752812  | A | C | 4 | 0.9034   | 0.7539 | 0.9955 | 1.0357 | 0.0001 | 86.15 |
| 2  | 134739376 | rs6735741  | A | G | 4 | 0.06675  | 0.7541 | 0.8496 | 0.9362 | 0.0085 | 74.33 |
| 2  | 210430270 | rs13010864 | A | G | 4 | 0.01084  | 0.7542 | 0.8678 | 0.9595 | 0.0058 | 76.01 |
| 4  | 1691146   | rs2854916  | A | G | 4 | 0.004227 | 0.7543 | 1.1125 | 1.0279 | 0.0045 | 77.07 |
| 4  | 151134607 | rs6823080  | A | C | 4 | 0.3259   | 0.7544 | 1.0467 | 0.9633 | 0.0018 | 80.07 |
| 7  | 107410778 | rs2701039  | A | G | 4 | 0.05956  | 0.7544 | 1.0691 | 1.0243 | 0.0132 | 72.08 |
| 9  | 91833463  | rs497510   | G | T | 4 | 0.03688  | 0.7546 | 1.0748 | 1.0247 | 0.0075 | 74.94 |
| 3  | 178817943 | rs9825151  | C | T | 4 | 0.0522   | 0.7556 | 1.0709 | 1.0328 | 0.0001 | 85.49 |
| 1  | 154345707 | rs915180   | C | T | 4 | 0.2069   | 0.756  | 0.9544 | 0.9729 | 0.0038 | 77.65 |

|    |           |            |   |   |   |          |        |        |        |        |       |
|----|-----------|------------|---|---|---|----------|--------|--------|--------|--------|-------|
| 2  | 134741186 | rs3791276  | A | C | 4 | 0.06007  | 0.757  | 0.8456 | 0.9382 | 0.0104 | 73.34 |
| 3  | 24671288  | rs6793060  | A | G | 4 | 0.09516  | 0.7579 | 1.0595 | 1.0241 | 0.0086 | 74.31 |
| 15 | 51234395  | rs7181898  | A | G | 4 | 0.3311   | 0.7582 | 1.0405 | 0.9627 | 0.0001 | 86.09 |
| 19 | 17338318  | rs7248564  | C | T | 4 | 0.1615   | 0.7587 | 1.0521 | 1.029  | 0.0027 | 78.84 |
| 12 | 2204705   | rs7312354  | C | T | 4 | 0.4478   | 0.7593 | 1.0817 | 0.9209 | 0.0019 | 79.86 |
| 6  | 153438568 | rs9397585  | C | T | 4 | 0.2686   | 0.7597 | 1.0418 | 1.0297 | 0.0011 | 81.24 |
| 1  | 75093605  | rs12120668 | C | G | 4 | 0.7248   | 0.76   | 0.9872 | 1.0277 | 0.003  | 78.42 |
| 2  | 71089580  | rs10179209 | A | G | 4 | 0.5359   | 0.76   | 0.9522 | 1.0824 | 0      | 89.15 |
| 2  | 172475093 | rs6727017  | A | T | 4 | 0.9501   | 0.761  | 1.0024 | 1.0349 | 0.0001 | 85.71 |
| 4  | 58908044  | rs11133558 | A | G | 4 | 0.1068   | 0.7612 | 1.065  | 1.0285 | 0.0039 | 77.54 |
| 2  | 210433939 | rs9631001  | C | T | 4 | 0.01243  | 0.7613 | 0.8714 | 0.9613 | 0.0066 | 75.49 |
| 2  | 210437244 | rs9973787  | A | G | 4 | 0.01328  | 0.7614 | 0.8725 | 0.9616 | 0.0071 | 75.17 |
| 2  | 210844857 | rs1396830  | A | G | 4 | 0.02344  | 0.7619 | 0.8773 | 0.9605 | 0.0084 | 74.43 |
| 2  | 210478772 | rs11688226 | C | T | 4 | 0.01299  | 0.763  | 0.8709 | 0.9619 | 0.0079 | 74.71 |
| 7  | 107409524 | rs2237702  | A | G | 4 | 0.09304  | 0.764  | 0.9429 | 0.9766 | 0.0081 | 74.6  |
| 2  | 210480528 | rs11694132 | A | G | 4 | 0.01305  | 0.7645 | 0.871  | 0.9621 | 0.0078 | 74.74 |
| 7  | 107409386 | rs2237701  | A | G | 4 | 0.09373  | 0.7645 | 1.0605 | 1.0239 | 0.0081 | 74.56 |
| 1  | 95781532  | rs678378   | A | G | 4 | 0.9048   | 0.7653 | 0.992  | 1.0507 | 0.0019 | 79.86 |
| 4  | 1700924   | rs798761   | A | G | 4 | 0.003869 | 0.7658 | 1.1146 | 1.027  | 0.0039 | 77.58 |
| 5  | 159147091 | rs2116732  | A | G | 4 | 0.8475   | 0.7669 | 0.9718 | 1.108  | 0.0029 | 78.53 |
| 2  | 210454100 | rs17748818 | C | T | 4 | 0.01409  | 0.7679 | 0.8724 | 0.9625 | 0.0073 | 75.07 |
| 12 | 9937319   | rs576601   | A | C | 4 | 0.4146   | 0.7681 | 0.9691 | 1.03   | 0.0011 | 81.26 |
| 1  | 95771471  | rs12141480 | C | G | 4 | 0.8885   | 0.7682 | 0.9908 | 1.0497 | 0.0018 | 80.07 |
| 11 | 109527367 | rs12362273 | A | C | 4 | 0.5868   | 0.769  | 1.0226 | 0.9662 | 0.0002 | 84.82 |
| 7  | 136933752 | rs706567   | C | T | 4 | 0.155    | 0.7691 | 1.1227 | 1.0633 | 0.0015 | 80.6  |
| 2  | 71088542  | rs10196871 | A | G | 4 | 0.4477   | 0.7692 | 1.0614 | 0.9273 | 0      | 89.1  |
| 12 | 2206430   | rs2239031  | G | T | 4 | 0.4368   | 0.7696 | 0.9231 | 1.0812 | 0.0021 | 79.63 |
| 3  | 54693761  | rs515920   | C | T | 4 | 0.3207   | 0.7699 | 0.9656 | 1.0279 | 0.0007 | 82.33 |
| 9  | 86066135  | rs4877830  | G | T | 4 | 0.05632  | 0.7704 | 1.1243 | 1.0538 | 0.0002 | 84.97 |
| 2  | 210481545 | rs6739769  | C | T | 4 | 0.0135   | 0.7708 | 0.8715 | 0.963  | 0.0077 | 74.84 |
| 3  | 24627817  | rs17014951 | A | G | 4 | 0.187    | 0.7712 | 1.0552 | 1.0271 | 0.0064 | 75.64 |
| 4  | 58882568  | rs1522096  | A | G | 4 | 0.1086   | 0.7716 | 0.9403 | 0.9742 | 0.0046 | 76.92 |
| 10 | 61813354  | rs7895653  | C | T | 4 | 0.03916  | 0.7716 | 0.9132 | 1.0349 | 0.0011 | 81.24 |
| 4  | 1707300   | rs11248073 | C | T | 4 | 0.00475  | 0.7718 | 0.8965 | 0.9734 | 0.0033 | 78.16 |
| 3  | 54720595  | rs652424   | C | T | 4 | 0.2593   | 0.7756 | 1.0418 | 1.0258 | 0.0023 | 79.33 |
| 1  | 95769656  | rs12136757 | C | T | 4 | 0.8492   | 0.7757 | 0.9876 | 1.0478 | 0.0017 | 80.15 |
| 18 | 6392126   | rs9965853  | C | T | 4 | 0.08456  | 0.7757 | 1.0636 | 1.023  | 0.0078 | 74.76 |

|    |           |            |   |   |   |          |        |        |        |        |       |
|----|-----------|------------|---|---|---|----------|--------|--------|--------|--------|-------|
| 3  | 54722284  | rs589281   | C | T | 4 | 0.2623   | 0.7758 | 1.0416 | 1.0258 | 0.0022 | 79.46 |
| 6  | 68836202  | rs12664094 | C | T | 3 | 0.1258   | 0.7761 | 1.2687 | 1.1131 | 0.0058 | 80.6  |
| 8  | 134282867 | rs2977527  | A | G | 4 | 0.3117   | 0.7765 | 0.9619 | 0.9738 | 0.0029 | 78.55 |
| 4  | 1712577   | rs1530588  | A | G | 4 | 0.00587  | 0.7772 | 1.1143 | 1.027  | 0.0032 | 78.25 |
| 2  | 210438805 | rs9973848  | A | G | 4 | 0.01604  | 0.7777 | 0.8759 | 0.9641 | 0.0067 | 75.43 |
| 2  | 134742338 | rs3791278  | A | G | 4 | 0.1038   | 0.7794 | 1.1638 | 1.0625 | 0.0091 | 74.01 |
| 2  | 210437762 | rs7595063  | A | C | 4 | 0.01621  | 0.7798 | 1.1415 | 1.037  | 0.0066 | 75.52 |
| 12 | 115328821 | rs17581242 | G | T | 4 | 0.1252   | 0.7801 | 1.0787 | 1.0361 | 0.0015 | 80.59 |
| 1  | 95757654  | rs881713   | A | G | 4 | 0.8826   | 0.7803 | 0.9904 | 1.0469 | 0.0015 | 80.49 |
| 2  | 210439257 | rs9973317  | C | T | 4 | 0.01635  | 0.7805 | 0.8762 | 0.9645 | 0.0066 | 75.49 |
| 20 | 39687101  | rs6124365  | A | C | 3 | 0.3244   | 0.7805 | 0.8295 | 0.8495 | 0.0023 | 83.56 |
| 15 | 51189302  | rs17545046 | A | G | 4 | 0.02282  | 0.7814 | 1.1171 | 1.0357 | 0.0011 | 81.4  |
| 11 | 109524916 | rs10891068 | A | G | 4 | 0.5284   | 0.7832 | 0.9743 | 1.0333 | 0.0001 | 85.23 |
| 18 | 6394347   | rs12961587 | A | G | 4 | 0.0484   | 0.7843 | 1.0732 | 1.023  | 0.005  | 76.66 |
| 1  | 154344873 | rs915179   | A | G | 4 | 0.2118   | 0.7844 | 0.9559 | 0.9765 | 0.0038 | 77.69 |
| 8  | 105323016 | rs2511586  | A | G | 4 | 0.2009   | 0.7852 | 0.9518 | 0.9766 | 0.0073 | 75.04 |
| 6  | 104916776 | rs156126   | C | T | 4 | 0.9608   | 0.7859 | 0.9978 | 0.969  | 0.001  | 81.45 |
| 3  | 24682368  | rs7644196  | C | G | 4 | 0.1319   | 0.7881 | 1.0545 | 1.0217 | 0.0071 | 75.19 |
| 2  | 210425175 | rs13013030 | C | G | 4 | 0.01613  | 0.7888 | 0.8763 | 0.9652 | 0.005  | 76.61 |
| 6  | 33106784  | rs9277029  | C | T | 4 | 0.1818   | 0.7889 | 1.0548 | 1.0237 | 0.0114 | 72.88 |
| 3  | 24656887  | rs9817530  | A | G | 4 | 0.0693   | 0.7902 | 0.9386 | 0.979  | 0.0064 | 75.59 |
| 3  | 24683878  | rs6767967  | A | G | 4 | 0.1439   | 0.7917 | 1.0524 | 1.0213 | 0.0064 | 75.6  |
| 11 | 109525001 | rs10891069 | C | T | 4 | 0.4984   | 0.7928 | 1.0279 | 0.9693 | 0.0001 | 85.49 |
| 20 | 5210168   | rs4580454  | C | G | 4 | 0.009679 | 0.793  | 0.9136 | 0.977  | 0.0018 | 80.1  |
| 6  | 153444523 | rs9478386  | A | G | 4 | 0.1621   | 0.7936 | 1.0507 | 1.0207 | 0.0089 | 74.11 |
| 15 | 51190404  | rs11858823 | A | G | 4 | 0.0138   | 0.7938 | 1.1141 | 1.0315 | 0.0007 | 82.35 |
| 2  | 210427142 | rs2159747  | C | T | 4 | 0.01736  | 0.7949 | 1.1402 | 1.035  | 0.0053 | 76.42 |
| 6  | 29937545  | rs2517830  | G | T | 2 | 0.007143 | 0.7952 | 1.3525 | 1.1004 | 0.0137 | 83.54 |
| 18 | 6392671   | rs12969887 | A | C | 4 | 0.07057  | 0.7952 | 1.0662 | 1.0214 | 0.0056 | 76.2  |
| 12 | 2212678   | rs7135319  | A | G | 4 | 0.4608   | 0.7953 | 0.9252 | 1.0733 | 0.0017 | 80.19 |
| 6  | 153444391 | rs9479502  | C | T | 4 | 0.1628   | 0.7954 | 1.0506 | 1.0205 | 0.0089 | 74.11 |
| 20 | 39646291  | rs6129876  | A | G | 3 | 0.3787   | 0.796  | 1.1757 | 1.1628 | 0.0019 | 84.02 |
| 2  | 210787411 | rs16844213 | C | T | 4 | 0.01841  | 0.7961 | 1.1444 | 1.0358 | 0.0062 | 75.79 |
| 20 | 39634949  | rs6093497  | A | G | 3 | 0.375    | 0.7966 | 0.8496 | 0.8603 | 0.0019 | 84.09 |
| 2  | 111309077 | rs13417566 | A | C | 4 | 0.1299   | 0.7968 | 0.9449 | 1.0255 | 0.001  | 81.58 |
| 3  | 24666213  | rs4452272  | C | T | 4 | 0.08965  | 0.797  | 0.942  | 0.9793 | 0.0055 | 76.29 |
| 6  | 153444170 | rs10872698 | A | G | 4 | 0.1662   | 0.7973 | 0.9522 | 0.9802 | 0.0092 | 73.95 |

|    |           |            |   |   |   |         |        |        |        |        |       |
|----|-----------|------------|---|---|---|---------|--------|--------|--------|--------|-------|
| 8  | 134283373 | rs4382455  | A | C | 4 | 0.3472  | 0.7974 | 0.9645 | 0.9758 | 0.0022 | 79.44 |
| 12 | 97115342  | rs7980332  | A | C | 4 | 0.2631  | 0.7974 | 1.0627 | 0.9647 | 0.0009 | 81.86 |
| 6  | 104920459 | rs271880   | A | G | 4 | 0.9963  | 0.7978 | 0.9998 | 1.0303 | 0.001  | 81.6  |
| 4  | 8631852   | rs2270269  | C | T | 4 | 0.02629 | 0.7987 | 1.0824 | 1.0196 | 0.0131 | 72.13 |
| 8  | 4089356   | rs1504769  | C | T | 4 | 0.7563  | 0.7987 | 0.9731 | 0.9345 | 0.0001 | 86.55 |
| 20 | 55492405  | rs6099650  | C | T | 4 | 0.1498  | 0.7991 | 0.951  | 0.9792 | 0.0041 | 77.35 |
| 1  | 95758927  | rs11165434 | G | T | 4 | 0.8253  | 0.7996 | 1.0146 | 0.9588 | 0.0014 | 80.64 |
| 2  | 210788369 | rs13415601 | A | T | 4 | 0.01844 | 0.8003 | 1.145  | 1.0351 | 0.0062 | 75.78 |
| 3  | 117029070 | rs2918217  | C | T | 4 | 0.02676 | 0.8009 | 0.8934 | 0.9717 | 0.01   | 73.56 |
| 2  | 210429691 | rs7579121  | C | T | 4 | 0.01819 | 0.8017 | 1.1398 | 1.0338 | 0.0054 | 76.29 |
| 9  | 86111098  | rs10868141 | C | T | 4 | 0.1418  | 0.8018 | 0.9132 | 0.9573 | 0.0003 | 84.16 |
| 1  | 95765051  | rs12135050 | A | G | 4 | 0.7954  | 0.8025 | 0.9831 | 1.0425 | 0.0015 | 80.57 |
| 4  | 189573141 | rs178329   | A | G | 4 | 0.2595  | 0.8028 | 1.0516 | 1.0255 | 0.0085 | 74.35 |
| 2  | 210816047 | rs263666   | A | G | 4 | 0.01775 | 0.8039 | 0.8685 | 0.9662 | 0.0074 | 74.99 |
| 3  | 24661552  | rs9843745  | A | G | 4 | 0.09123 | 0.8041 | 0.9423 | 0.9803 | 0.0064 | 75.6  |
| 4  | 8631775   | rs2270270  | C | G | 4 | 0.02718 | 0.8054 | 1.0819 | 1.0189 | 0.0128 | 72.24 |
| 3  | 60013318  | rs212041   | G | T | 4 | 0.6456  | 0.8055 | 1.0281 | 0.9617 | 0.0008 | 82.19 |
| 2  | 210781582 | rs1509572  | A | T | 4 | 0.01886 | 0.806  | 1.1445 | 1.0341 | 0.0063 | 75.72 |
| 6  | 104917442 | rs13219556 | C | T | 4 | 0.9795  | 0.806  | 1.0011 | 0.9721 | 0.0011 | 81.41 |
| 3  | 60013621  | rs212039   | C | T | 4 | 0.6471  | 0.8064 | 1.0281 | 0.9617 | 0.0008 | 82.17 |
| 2  | 210775646 | rs263680   | A | G | 4 | 0.017   | 0.8072 | 1.1478 | 1.0338 | 0.0067 | 75.44 |
| 20 | 39586586  | rs16985881 | A | G | 3 | 0.3996  | 0.8072 | 0.8566 | 0.8663 | 0.0017 | 84.33 |
| 20 | 39585961  | rs16985879 | C | T | 3 | 0.4021  | 0.808  | 1.1664 | 1.1535 | 0.0017 | 84.31 |
| 20 | 39591123  | rs6102451  | A | G | 3 | 0.4021  | 0.808  | 1.1664 | 1.1535 | 0.0017 | 84.31 |
| 2  | 210771597 | rs263681   | C | G | 4 | 0.01738 | 0.8083 | 1.1466 | 1.0336 | 0.0066 | 75.52 |
| 6  | 33114200  | rs9277053  | A | G | 4 | 0.199   | 0.8083 | 0.9499 | 0.9787 | 0.0095 | 73.83 |
| 2  | 107922950 | rs6734993  | C | T | 4 | 0.1748  | 0.8084 | 0.9406 | 0.9745 | 0.0039 | 77.53 |
| 1  | 202838673 | rs10900601 | A | G | 4 | 0.09013 | 0.8087 | 1.068  | 1.0197 | 0.0186 | 69.97 |
| 2  | 210427017 | rs2191909  | C | G | 4 | 0.01826 | 0.8087 | 0.878  | 0.9681 | 0.0046 | 76.95 |
| 2  | 210777256 | rs1509568  | C | T | 4 | 0.0191  | 0.8089 | 0.8745 | 0.9676 | 0.006  | 75.9  |
| 6  | 33106216  | rs9277027  | A | G | 4 | 0.1966  | 0.809  | 1.053  | 1.0216 | 0.01   | 73.55 |
| 8  | 134284294 | rs2977530  | A | G | 4 | 0.3974  | 0.809  | 0.9682 | 0.977  | 0.0018 | 80.01 |
| 10 | 124083263 | rs10887132 | C | T | 4 | 0.06599 | 0.809  | 0.9236 | 0.9727 | 0.0007 | 82.27 |
| 3  | 11452387  | rs7623889  | C | T | 4 | 0.153   | 0.8093 | 1.127  | 1.0427 | 0.0134 | 71.98 |
| 11 | 109531136 | rs584008   | C | T | 4 | 0.595   | 0.8093 | 1.0222 | 0.9721 | 0.0002 | 84.54 |
| 1  | 55471611  | rs10788998 | A | G | 4 | 0.1337  | 0.8094 | 0.9409 | 0.9799 | 0.0196 | 69.65 |
| 1  | 202873597 | rs4951084  | C | G | 4 | 0.02202 | 0.8103 | 1.1024 | 1.0234 | 0.0069 | 75.27 |

|    |           |            |   |   |   |          |        |        |        |        |       |
|----|-----------|------------|---|---|---|----------|--------|--------|--------|--------|-------|
| 21 | 19396021  | rs8129059  | C | T | 3 | 0.3133   | 0.8104 | 0.9595 | 1.0324 | 0.0002 | 88.45 |
| 2  | 111314462 | rs1533295  | A | G | 4 | 0.07786  | 0.8113 | 0.936  | 0.9804 | 0.0099 | 73.62 |
| 3  | 24678903  | rs11928551 | G | T | 4 | 0.108    | 0.8115 | 1.0578 | 1.0196 | 0.0053 | 76.43 |
| 2  | 111308878 | rs2175824  | G | T | 4 | 0.1152   | 0.8117 | 1.0607 | 0.977  | 0.001  | 81.51 |
| 4  | 189571191 | rs12504780 | C | T | 4 | 0.3018   | 0.8121 | 0.9555 | 0.9758 | 0.006  | 75.9  |
| 2  | 210425771 | rs7584039  | C | T | 4 | 0.01867  | 0.8124 | 1.1385 | 1.0323 | 0.0045 | 77.02 |
| 10 | 124083189 | rs10887131 | C | G | 4 | 0.06732  | 0.8126 | 0.924  | 0.9732 | 0.0007 | 82.35 |
| 6  | 104918438 | rs156123   | A | G | 4 | 0.9556   | 0.8128 | 1.0024 | 0.9731 | 0.0011 | 81.31 |
| 3  | 178817999 | rs9880740  | A | G | 4 | 0.06407  | 0.8131 | 1.0674 | 1.0247 | 0.0001 | 85.37 |
| 1  | 152525899 | rs1760802  | C | G | 4 | 0.4319   | 0.8135 | 1.0284 | 0.9789 | 0.0017 | 80.13 |
| 1  | 152512136 | rs1194593  | A | G | 4 | 0.4361   | 0.8143 | 1.0281 | 0.9791 | 0.0018 | 79.96 |
| 12 | 2196442   | rs10848641 | C | T | 4 | 0.3548   | 0.8148 | 1.1005 | 0.9399 | 0.0024 | 79.19 |
| 2  | 210762844 | rs1155845  | C | T | 4 | 0.01715  | 0.8156 | 1.1476 | 1.0323 | 0.0068 | 75.39 |
| 12 | 2212897   | rs7305301  | C | G | 4 | 0.5435   | 0.8159 | 0.94   | 1.064  | 0.0016 | 80.28 |
| 12 | 2201258   | rs12228890 | A | C | 4 | 0.3652   | 0.8164 | 1.0979 | 0.9406 | 0.0025 | 79.1  |
| 1  | 152509739 | rs1044013  | C | T | 4 | 0.4211   | 0.8168 | 1.0288 | 0.9795 | 0.0018 | 80.03 |
| 2  | 210826582 | rs6716836  | A | G | 4 | 0.009598 | 0.8181 | 1.1846 | 1.0346 | 0.0119 | 72.65 |
| 6  | 154734212 | rs9397710  | A | C | 4 | 0.2312   | 0.8182 | 0.9089 | 0.9575 | 0.0044 | 77.15 |
| 7  | 5295742   | rs6959643  | A | T | 4 | 0.1594   | 0.8182 | 1.0519 | 0.9796 | 0.0022 | 79.48 |
| 7  | 26507861  | rs7811868  | A | G | 4 | 0.1835   | 0.8186 | 1.0498 | 0.9799 | 0.0032 | 78.27 |
| 12 | 2196430   | rs10848640 | C | G | 4 | 0.3484   | 0.8187 | 0.9075 | 1.0623 | 0.0025 | 79.02 |
| 3  | 113068623 | rs17424938 | A | G | 4 | 0.6522   | 0.819  | 1.0228 | 0.9727 | 0.0028 | 78.7  |
| 3  | 24690109  | rs1984874  | C | T | 4 | 0.05767  | 0.8194 | 1.0685 | 1.0206 | 0.0015 | 80.61 |
| 11 | 109524141 | rs653992   | C | T | 4 | 0.5113   | 0.8198 | 1.0265 | 0.9747 | 0.0003 | 84.31 |
| 2  | 111312209 | rs12463526 | A | G | 4 | 0.1028   | 0.8205 | 1.0621 | 0.9789 | 0.0016 | 80.32 |
| 14 | 94394040  | rs11160216 | A | G | 3 | 0.2561   | 0.8205 | 1.1185 | 1.0776 | 0.0009 | 85.75 |
| 12 | 2196239   | rs11062158 | C | T | 4 | 0.342    | 0.8213 | 1.1033 | 0.9422 | 0.0026 | 78.99 |
| 2  | 29141613  | rs12620307 | A | G | 4 | 0.2099   | 0.8215 | 0.95   | 0.9804 | 0.0137 | 71.88 |
| 2  | 29141728  | rs12714260 | C | G | 4 | 0.2076   | 0.8217 | 1.0529 | 1.0199 | 0.0139 | 71.8  |
| 3  | 24686017  | rs6770162  | A | G | 4 | 0.15     | 0.8218 | 0.9506 | 0.9815 | 0.0045 | 77.03 |
| 2  | 29141212  | rs10182566 | C | T | 4 | 0.1703   | 0.822  | 0.945  | 0.98   | 0.0118 | 72.69 |
| 3  | 24683078  | rs17787397 | C | T | 4 | 0.1396   | 0.8225 | 1.0535 | 1.0183 | 0.0063 | 75.66 |
| 6  | 154734269 | rs9371793  | C | T | 4 | 0.2423   | 0.8251 | 1.0978 | 1.0427 | 0.0041 | 77.35 |
| 6  | 154739604 | rs7744573  | C | T | 4 | 0.2373   | 0.8257 | 0.9115 | 0.9601 | 0.0046 | 76.93 |
| 11 | 109524562 | rs694974   | C | T | 4 | 0.4755   | 0.826  | 1.0289 | 0.9755 | 0.0002 | 84.47 |
| 6  | 154732717 | rs9397709  | C | T | 4 | 0.2433   | 0.8266 | 1.098  | 1.0425 | 0.0042 | 77.33 |
| 2  | 210826755 | rs6760874  | C | T | 4 | 0.02543  | 0.827  | 0.8793 | 0.9703 | 0.0056 | 76.18 |



|    |           |            |   |   |   |         |        |        |        |        |       |
|----|-----------|------------|---|---|---|---------|--------|--------|--------|--------|-------|
| 2  | 71089555  | rs10189222 | C | T | 3 | 0.1246  | 0.8271 | 0.8497 | 1.0953 | 0      | 92.05 |
| 1  | 202846320 | rs898386   | A | G | 4 | 0.08388 | 0.8294 | 1.0682 | 1.0182 | 0.0106 | 73.25 |
| 3  | 178825162 | rs1875102  | C | T | 4 | 0.07828 | 0.8302 | 1.064  | 1.0224 | 0.0001 | 85.42 |
| 3  | 24675281  | rs2362754  | C | G | 4 | 0.09812 | 0.8313 | 0.9443 | 0.9824 | 0.0034 | 78.01 |
| 6  | 154735267 | rs9383704  | A | G | 4 | 0.2472  | 0.8313 | 1.0961 | 1.0412 | 0.0039 | 77.59 |
| 6  | 154735871 | rs9384206  | C | T | 4 | 0.2453  | 0.8314 | 1.0968 | 1.0409 | 0.0042 | 77.27 |
| 11 | 109525740 | rs602189   | A | G | 4 | 0.508   | 0.8315 | 0.972  | 1.0257 | 0.0003 | 84.06 |
| 21 | 19398897  | rs1475897  | A | G | 3 | 0.3314  | 0.8317 | 1.0403 | 0.9725 | 0.0002 | 88.26 |
| 6  | 154735852 | rs9371795  | C | T | 4 | 0.2513  | 0.8328 | 1.0952 | 1.0407 | 0.004  | 77.45 |
| 6  | 153441972 | rs9479499  | A | T | 4 | 0.1964  | 0.833  | 0.9553 | 0.9833 | 0.0071 | 75.18 |
| 6  | 153442739 | rs10872697 | G | T | 4 | 0.1964  | 0.833  | 0.9553 | 0.9833 | 0.0071 | 75.18 |
| 6  | 154734121 | rs9384205  | C | T | 4 | 0.2547  | 0.8364 | 0.9131 | 0.9613 | 0.0037 | 77.73 |
| 11 | 109526143 | rs683593   | A | C | 4 | 0.4623  | 0.8364 | 1.0298 | 0.9769 | 0.0002 | 84.58 |
| 2  | 210810084 | rs13009758 | C | T | 4 | 0.02463 | 0.8365 | 1.1372 | 1.029  | 0.0051 | 76.58 |
| 15 | 51214304  | rs17545312 | A | G | 4 | 0.04732 | 0.8383 | 0.9137 | 0.9742 | 0.0003 | 84.13 |
| 5  | 40665104  | rs11739531 | C | T | 4 | 0.02608 | 0.8384 | 0.922  | 0.9831 | 0.006  | 75.88 |
| 15 | 51322236  | rs17628504 | A | G | 4 | 0.1939  | 0.8386 | 0.9387 | 1.0287 | 0.0003 | 84.12 |
| 1  | 55481326  | rs12063029 | A | G | 4 | 0.1453  | 0.8388 | 1.0625 | 1.0178 | 0.0188 | 69.93 |
| 2  | 111318413 | rs10180446 | C | G | 4 | 0.09094 | 0.839  | 1.0649 | 1.0171 | 0.0088 | 74.16 |
| 11 | 109527592 | rs581464   | G | T | 4 | 0.4531  | 0.8411 | 1.0304 | 0.9776 | 0.0002 | 84.54 |
| 6  | 154740453 | rs6557347  | C | T | 4 | 0.2416  | 0.8414 | 0.9126 | 0.964  | 0.0051 | 76.57 |
| 4  | 183403974 | rs7656126  | G | T | 3 | 0.1844  | 0.842  | 1.0554 | 1.0225 | 0.0022 | 83.71 |
| 3  | 24680225  | rs9812637  | A | G | 4 | 0.1152  | 0.8425 | 0.9465 | 0.9838 | 0.0046 | 76.98 |
| 11 | 109527801 | rs2846615  | C | T | 4 | 0.447   | 0.8425 | 1.0308 | 0.9777 | 0.0002 | 84.58 |
| 3  | 24690139  | rs1984870  | G | T | 4 | 0.06693 | 0.8429 | 1.0661 | 1.0181 | 0.0012 | 81.13 |
| 3  | 176290623 | rs1463524  | C | T | 4 | 0.3026  | 0.8442 | 0.9642 | 1.0173 | 0.0025 | 79.1  |
| 7  | 52977371  | rs1689299  | A | T | 4 | 0.3638  | 0.8458 | 0.9557 | 1.0261 | 0.001  | 81.53 |
| 6  | 104920190 | rs17458588 | C | T | 4 | 0.9588  | 0.846  | 0.9977 | 1.0231 | 0.0008 | 82.17 |
| 11 | 109526092 | rs600421   | G | T | 4 | 0.4145  | 0.847  | 0.9682 | 1.0221 | 0.0002 | 84.78 |
| 11 | 109528374 | rs622822   | G | T | 4 | 0.4381  | 0.8477 | 0.9695 | 1.0219 | 0.0002 | 84.46 |
| 2  | 210745449 | rs263675   | A | G | 4 | 0.02216 | 0.8479 | 0.8754 | 0.974  | 0.0067 | 75.43 |
| 4  | 109392362 | rs931771   | C | T | 4 | 0.07874 | 0.8482 | 1.073  | 1.0171 | 0.0095 | 73.81 |
| 1  | 152505007 | rs1194596  | A | G | 4 | 0.3581  | 0.8493 | 1.0327 | 0.9833 | 0.0018 | 80.02 |
| 11 | 115317381 | rs1145180  | A | G | 4 | 0.2206  | 0.8494 | 0.9566 | 0.9842 | 0.0058 | 76.05 |
| 21 | 29929217  | rs2245338  | C | T | 4 | 0.5248  | 0.8535 | 1.0343 | 0.9699 | 0      | 87.2  |
| 2  | 111320584 | rs1554006  | A | G | 4 | 0.07623 | 0.8543 | 1.0716 | 1.0163 | 0.0072 | 75.11 |
| 11 | 109528838 | rs665013   | C | T | 4 | 0.4176  | 0.8553 | 0.9682 | 1.0208 | 0.0002 | 84.52 |

|    |           |            |   |   |   |         |        |        |        |        |       |
|----|-----------|------------|---|---|---|---------|--------|--------|--------|--------|-------|
| 2  | 111321113 | rs13019266 | C | T | 4 | 0.1067  | 0.8558 | 0.9412 | 0.985  | 0.0094 | 73.84 |
| 8  | 135108870 | rs16905053 | A | T | 4 | 0.2066  | 0.8569 | 0.9389 | 0.9782 | 0.0025 | 79.06 |
| 15 | 51195790  | rs12442241 | A | T | 4 | 0.06282 | 0.8596 | 0.9127 | 0.9775 | 0.0008 | 82.14 |
| 6  | 30040979  | rs3873283  | A | G | 4 | 0.2007  | 0.8603 | 1.0681 | 1.02   | 0.0082 | 74.52 |
| 1  | 202845996 | rs898387   | A | G | 4 | 0.09986 | 0.8609 | 0.9391 | 0.9852 | 0.009  | 74.1  |
| 3  | 54683416  | rs517729   | A | G | 4 | 0.1922  | 0.8614 | 0.9554 | 1.0161 | 0.001  | 81.6  |
| 2  | 210508108 | rs10200921 | A | G | 4 | 0.1408  | 0.8615 | 1.0818 | 0.9772 | 0.0037 | 77.79 |
| 11 | 109529896 | rs633410   | C | T | 4 | 0.4375  | 0.8617 | 0.9695 | 1.0198 | 0.0003 | 84.29 |
| 1  | 214171639 | rs646576   | A | G | 3 | 0.2974  | 0.8622 | 0.9507 | 1.029  | 0      | 90.04 |
| 15 | 51214080  | rs17627721 | G | T | 4 | 0.04767 | 0.8624 | 0.9137 | 0.9778 | 0.0002 | 84.41 |
| 3  | 59364649  | rs4679546  | A | C | 4 | 0.06769 | 0.8626 | 1.0814 | 1.0161 | 0.0143 | 71.61 |
| 6  | 104923637 | rs1417665  | C | T | 4 | 0.8954  | 0.8634 | 0.9943 | 1.0206 | 0.0007 | 82.36 |
| 6  | 104924468 | rs17459015 | C | T | 4 | 0.8907  | 0.8634 | 0.994  | 1.0205 | 0.0007 | 82.22 |
| 2  | 181898803 | rs17198619 | G | T | 4 | 0.1114  | 0.8673 | 0.903  | 0.9706 | 0.0006 | 82.67 |
| 2  | 111323872 | rs7576541  | C | T | 4 | 0.1142  | 0.8679 | 1.0611 | 1.0141 | 0.0085 | 74.35 |
| 2  | 151933334 | rs10432476 | C | T | 4 | 0.08342 | 0.8679 | 1.0642 | 1.013  | 0.0118 | 72.67 |
| 6  | 154741048 | rs7746647  | A | T | 4 | 0.2842  | 0.8682 | 1.0843 | 1.0303 | 0.0047 | 76.89 |
| 8  | 4075094   | rs17069640 | G | T | 4 | 0.8613  | 0.8688 | 1.0162 | 1.0395 | 0.0014 | 80.78 |
| 2  | 151932585 | rs3771895  | A | G | 4 | 0.08528 | 0.8696 | 1.0638 | 1.0128 | 0.0121 | 72.54 |
| 2  | 111311960 | rs12463442 | A | G | 4 | 0.09849 | 0.8712 | 1.0634 | 0.985  | 0.0021 | 79.62 |
| 11 | 109529837 | rs649847   | C | G | 4 | 0.4063  | 0.872  | 0.9674 | 1.0184 | 0.0002 | 84.54 |
| 6  | 30040645  | rs9260734  | A | G | 4 | 0.2212  | 0.8729 | 0.9393 | 0.9821 | 0.0073 | 75.03 |
| 20 | 10167799  | rs363012   | A | G | 4 | 0.4392  | 0.8735 | 0.9715 | 1.0168 | 0.0005 | 83.11 |
| 2  | 111323062 | rs9917154  | C | G | 4 | 0.1184  | 0.8749 | 0.9431 | 0.9868 | 0.0084 | 74.43 |
| 11 | 109530847 | rs585334   | A | G | 4 | 0.4035  | 0.8752 | 0.9672 | 1.0179 | 0.0002 | 84.44 |
| 6  | 104904271 | rs17517558 | A | C | 4 | 0.8324  | 0.8771 | 1.0093 | 0.9817 | 0.0006 | 82.78 |
| 6  | 104904758 | rs156153   | A | G | 4 | 0.8324  | 0.8771 | 1.0093 | 0.9817 | 0.0006 | 82.78 |
| 6  | 104905700 | rs156151   | C | G | 4 | 0.8356  | 0.8772 | 0.9909 | 1.0186 | 0.0006 | 82.71 |
| 6  | 104912555 | rs155510   | G | T | 4 | 0.8202  | 0.8805 | 0.9901 | 1.0181 | 0.0006 | 82.68 |
| 2  | 111315753 | rs10210955 | C | G | 4 | 0.02706 | 0.8809 | 0.9258 | 0.9875 | 0.0033 | 78.11 |
| 5  | 40682317  | rs7716982  | G | T | 4 | 0.0291  | 0.881  | 0.9234 | 0.9873 | 0.0048 | 76.76 |
| 8  | 134285128 | rs753722   | C | G | 4 | 0.4431  | 0.8814 | 0.9712 | 0.9854 | 0.0012 | 81.03 |
| 11 | 109531670 | rs679264   | A | G | 4 | 0.3886  | 0.8825 | 1.035  | 0.9835 | 0.0002 | 84.39 |
| 11 | 109531787 | rs678835   | C | T | 4 | 0.3875  | 0.8835 | 0.9661 | 1.0166 | 0.0003 | 84.36 |
| 8  | 135109347 | rs16905054 | A | G | 4 | 0.2427  | 0.8836 | 1.0601 | 1.0184 | 0.0019 | 79.82 |
| 11 | 109532396 | rs17110877 | A | G | 4 | 0.3804  | 0.8873 | 1.0356 | 0.9842 | 0.0003 | 84.36 |
| 6  | 104891512 | rs270678   | C | T | 4 | 0.7612  | 0.8887 | 0.9868 | 1.0168 | 0.0006 | 82.61 |

|    |           |            |   |   |   |          |        |        |        |        |       |
|----|-----------|------------|---|---|---|----------|--------|--------|--------|--------|-------|
| 4  | 189571301 | rs12504808 | C | T | 4 | 0.3784   | 0.8888 | 0.9617 | 0.9851 | 0.0037 | 77.71 |
| 3  | 172708739 | rs7651813  | A | G | 4 | 0.3599   | 0.89   | 1.0387 | 1.0142 | 0.0023 | 79.31 |
| 15 | 51194001  | rs690535   | G | T | 4 | 0.04594  | 0.8902 | 1.095  | 1.0177 | 0.0003 | 83.83 |
| 5  | 40683520  | rs6882769  | C | T | 4 | 0.06214  | 0.8916 | 0.933  | 0.989  | 0.0109 | 73.12 |
| 20 | 10827336  | rs4346455  | C | T | 4 | 0.2483   | 0.8935 | 0.9602 | 0.9889 | 0.0043 | 77.23 |
| 13 | 100537995 | rs4265682  | G | T | 4 | 0.3424   | 0.8953 | 1.0355 | 1.012  | 0.0023 | 79.29 |
| 15 | 51238288  | rs11070957 | G | T | 4 | 0.06851  | 0.8989 | 0.9204 | 0.9833 | 0.0002 | 85.17 |
| 3  | 24682097  | rs7643926  | C | T | 4 | 0.07209  | 0.8993 | 1.0665 | 1.0103 | 0.0071 | 75.2  |
| 5  | 40693709  | rs7730020  | C | T | 4 | 0.03208  | 0.8995 | 1.0814 | 1.0109 | 0.0044 | 77.11 |
| 6  | 68815788  | rs9445968  | G | T | 3 | 0.286    | 0.9001 | 1.1777 | 1.0532 | 0.0018 | 84.14 |
| 8  | 14915797  | rs7817295  | A | T | 4 | 0.04377  | 0.9007 | 0.9312 | 0.989  | 0.002  | 79.75 |
| 11 | 109540511 | rs1026607  | A | G | 4 | 0.4101   | 0.9007 | 1.0334 | 0.9859 | 0.0002 | 84.65 |
| 11 | 109540472 | rs1026608  | A | G | 4 | 0.4115   | 0.9013 | 1.0333 | 0.986  | 0.0002 | 84.61 |
| 3  | 30365684  | rs977305   | A | G | 4 | 0.3905   | 0.9016 | 1.0323 | 0.9886 | 0.0018 | 79.97 |
| 11 | 109538856 | rs621672   | C | T | 4 | 0.3799   | 0.9025 | 1.0357 | 0.9863 | 0.0002 | 84.38 |
| 3  | 30362570  | rs12634878 | A | G | 4 | 0.386    | 0.9026 | 1.0324 | 0.9888 | 0.002  | 79.75 |
| 15 | 51240801  | rs10518706 | C | T | 4 | 0.06925  | 0.9042 | 0.9206 | 0.9841 | 0.0001 | 85.24 |
| 2  | 232078303 | rs4449121  | A | C | 4 | 0.3988   | 0.9044 | 0.9447 | 0.9778 | 0.0003 | 84.25 |
| 3  | 24691768  | rs2362756  | G | T | 4 | 0.09052  | 0.9066 | 1.0615 | 1.0108 | 0.0011 | 81.25 |
| 11 | 109533247 | rs3017769  | A | G | 4 | 0.3679   | 0.9066 | 0.9647 | 1.0133 | 0.0002 | 84.43 |
| 4  | 109416443 | rs11725852 | C | T | 4 | 0.04638  | 0.908  | 1.0815 | 1.0105 | 0.0058 | 76.02 |
| 7  | 52974032  | rs11769082 | C | T | 4 | 0.2264   | 0.9082 | 1.0634 | 0.9855 | 0.0027 | 78.81 |
| 11 | 109538447 | rs622192   | A | T | 4 | 0.361    | 0.9097 | 0.9642 | 1.0129 | 0.0002 | 84.39 |
| 1  | 4503964   | rs241215   | A | T | 4 | 0.2212   | 0.9109 | 1.0451 | 0.9899 | 0.0016 | 80.37 |
| 15 | 51245627  | rs10518710 | C | G | 4 | 0.09016  | 0.9115 | 1.0777 | 1.0132 | 0.0008 | 82.11 |
| 13 | 46486944  | rs754325   | C | T | 4 | 0.155    | 0.9141 | 0.9461 | 0.9909 | 0.0101 | 73.5  |
| 13 | 44583847  | rs2025418  | C | T | 4 | 0.135    | 0.9164 | 1.0737 | 0.988  | 0.0039 | 77.6  |
| 3  | 146903072 | rs3844271  | A | G | 4 | 0.004665 | 0.9231 | 0.9007 | 0.9908 | 0.0012 | 81.19 |
| 2  | 210710058 | rs2160020  | C | T | 4 | 0.04616  | 0.9261 | 1.1247 | 1.0127 | 0.0089 | 74.15 |
| 6  | 33124706  | rs375912   | C | T | 4 | 0.1455   | 0.9264 | 0.9463 | 0.9924 | 0.0111 | 73.01 |
| 4  | 109399892 | rs3913354  | A | T | 4 | 0.04552  | 0.927  | 1.0813 | 1.0083 | 0.0056 | 76.16 |
| 3  | 30361864  | rs17623772 | C | T | 4 | 0.3665   | 0.9277 | 1.0338 | 0.9917 | 0.0021 | 79.56 |
| 2  | 232142905 | rs10460338 | C | T | 4 | 0.582    | 0.9281 | 1.035  | 0.9823 | 0      | 87.33 |
| 5  | 172714540 | rs4867706  | A | G | 4 | 0.3287   | 0.9294 | 1.0404 | 1.0083 | 0.0063 | 75.66 |
| 15 | 51225655  | rs16965587 | G | T | 4 | 0.09787  | 0.9295 | 0.9245 | 0.9879 | 0.0002 | 85.17 |
| 2  | 232144608 | rs6727830  | A | G | 4 | 0.4819   | 0.9299 | 0.9567 | 1.0174 | 0      | 86.97 |
| 3  | 30335858  | rs9876727  | A | C | 4 | 0.1404   | 0.9304 | 0.9489 | 0.9927 | 0.0047 | 76.88 |

|    |           |            |   |   |   |          |        |        |        |        |       |
|----|-----------|------------|---|---|---|----------|--------|--------|--------|--------|-------|
| 3  | 11219825  | rs12493961 | A | G | 4 | 0.3063   | 0.9344 | 1.1081 | 0.9794 | 0.0012 | 81.01 |
| 6  | 104874894 | rs17516082 | A | G | 4 | 0.6452   | 0.9352 | 1.0203 | 0.9903 | 0.0005 | 83.07 |
| 3  | 30335640  | rs9876671  | A | G | 4 | 0.1458   | 0.9356 | 0.9496 | 0.9933 | 0.0045 | 77.03 |
| 2  | 111316177 | rs4849121  | A | G | 4 | 0.0336   | 0.936  | 0.9296 | 0.9933 | 0.0033 | 78.13 |
| 3  | 30328416  | rs6809482  | A | G | 4 | 0.1468   | 0.9382 | 0.9497 | 0.9936 | 0.0049 | 76.74 |
| 3  | 30330791  | rs6781057  | G | T | 4 | 0.1468   | 0.9382 | 0.9497 | 0.9936 | 0.0049 | 76.74 |
| 6  | 104878861 | rs4945639  | C | T | 4 | 0.5975   | 0.9386 | 1.0233 | 0.991  | 0.0007 | 82.42 |
| 2  | 67716071  | rs6726828  | G | T | 4 | 0.4616   | 0.9404 | 1.0274 | 1.0069 | 0.0017 | 80.15 |
| 1  | 55462173  | rs4926672  | A | G | 4 | 0.2084   | 0.9409 | 1.0525 | 1.0067 | 0.0106 | 73.26 |
| 6  | 104872515 | rs17456339 | C | T | 4 | 0.625    | 0.941  | 1.0215 | 0.9911 | 0.0005 | 83.1  |
| 1  | 4508910   | rs241221   | C | T | 4 | 0.2141   | 0.9412 | 1.0458 | 0.9938 | 0.0047 | 76.9  |
| 2  | 67713993  | rs6760893  | A | G | 4 | 0.4291   | 0.9426 | 1.0292 | 1.0067 | 0.0015 | 80.53 |
| 1  | 55460604  | rs11206524 | C | T | 4 | 0.2165   | 0.9427 | 1.0515 | 1.0065 | 0.0102 | 73.47 |
| 3  | 30323764  | rs6549981  | C | T | 4 | 0.1495   | 0.9427 | 1.0526 | 1.006  | 0.0049 | 76.74 |
| 3  | 30361546  | rs7629687  | A | T | 4 | 0.2208   | 0.9435 | 0.9566 | 1.0064 | 0.0021 | 79.58 |
| 3  | 134947308 | rs8177185  | A | G | 3 | 0.002635 | 0.9439 | 1.3816 | 0.9707 | 0.008  | 79.26 |
| 2  | 67713787  | rs17033996 | A | G | 4 | 0.4348   | 0.9454 | 0.972  | 0.9936 | 0.0014 | 80.68 |
| 2  | 67714314  | rs6732490  | A | C | 4 | 0.4348   | 0.9454 | 0.972  | 0.9936 | 0.0014 | 80.68 |
| 3  | 134947891 | rs8177186  | G | T | 3 | 0.002491 | 0.9472 | 0.7225 | 1.0283 | 0.0081 | 79.24 |
| 2  | 43704094  | rs11886047 | C | T | 4 | 0.2825   | 0.9508 | 0.9539 | 0.9938 | 0.005  | 76.61 |
| 1  | 62513884  | rs17123324 | A | G | 4 | 0.2039   | 0.9522 | 1.2156 | 1.0231 | 0.0029 | 78.62 |
| 3  | 30330534  | rs6780847  | C | T | 4 | 0.1593   | 0.9526 | 0.9512 | 0.995  | 0.0044 | 77.12 |
| 6  | 104880442 | rs13197557 | A | G | 4 | 0.6012   | 0.953  | 1.023  | 0.993  | 0.0006 | 82.69 |
| 3  | 30329364  | rs11129397 | C | T | 4 | 0.1605   | 0.9531 | 1.0512 | 1.005  | 0.0043 | 77.23 |
| 2  | 232140542 | rs4340504  | A | C | 4 | 0.5325   | 0.9536 | 1.04   | 0.9888 | 0.0001 | 86.49 |
| 3  | 134949575 | rs4532136  | A | G | 3 | 0.002645 | 0.9536 | 1.3845 | 0.9758 | 0.0082 | 79.19 |
| 8  | 14907805  | rs1125265  | C | T | 4 | 0.1336   | 0.9544 | 0.9485 | 0.9953 | 0.0049 | 76.72 |
| 2  | 232145603 | rs10498258 | A | G | 4 | 0.5273   | 0.9552 | 1.0396 | 0.9893 | 0      | 86.77 |
| 18 | 21695157  | rs8098773  | C | T | 4 | 0.4259   | 0.9566 | 1.029  | 1.0048 | 0.0022 | 79.48 |
| 8  | 4064166   | rs12674947 | A | G | 4 | 0.7109   | 0.9568 | 0.9665 | 0.9866 | 0.0008 | 82.16 |
| 8  | 135162883 | rs1870126  | C | T | 4 | 0.2888   | 0.9574 | 0.9637 | 0.9956 | 0.0038 | 77.68 |
| 3  | 134917507 | rs11715340 | A | T | 3 | 0.008424 | 0.9605 | 1.3321 | 0.9788 | 0.0085 | 79.03 |
| 1  | 4503184   | rs694935   | A | T | 4 | 0.1693   | 0.9612 | 1.0508 | 0.9957 | 0.0024 | 79.23 |
| 2  | 21281690  | rs312052   | A | G | 4 | 0.2708   | 0.9631 | 0.9554 | 1.0045 | 0.0065 | 75.54 |
| 3  | 30319780  | rs1390298  | C | T | 4 | 0.1659   | 0.9637 | 1.0505 | 1.0038 | 0.0049 | 76.7  |
| 8  | 134275461 | rs16893344 | C | T | 4 | 0.6407   | 0.9653 | 1.0171 | 0.9955 | 0.0002 | 84.66 |
| 7  | 52979122  | rs1689304  | A | C | 4 | 0.07523  | 0.9655 | 1.0794 | 1.0047 | 0.0018 | 80.04 |

|    |           |            |   |   |   |          |        |        |        |        |       |
|----|-----------|------------|---|---|---|----------|--------|--------|--------|--------|-------|
| 2  | 232149419 | rs13025854 | A | C | 4 | 0.4514   | 0.9669 | 0.954  | 0.9922 | 0.0001 | 86    |
| 18 | 21693248  | rs1626332  | A | T | 4 | 0.4634   | 0.9709 | 0.9741 | 0.9967 | 0.0018 | 80.01 |
| 7  | 52979766  | rs1689306  | A | G | 4 | 0.07729  | 0.9713 | 1.0788 | 1.0039 | 0.0018 | 80.03 |
| 7  | 53069533  | rs1689330  | C | G | 4 | 0.09915  | 0.9722 | 1.074  | 1.0035 | 0.0064 | 75.59 |
| 1  | 4499103   | rs592726   | C | T | 4 | 0.126    | 0.9777 | 0.9459 | 0.9976 | 0.0038 | 77.65 |
| 3  | 30322459  | rs1495578  | A | G | 4 | 0.1598   | 0.9799 | 0.9508 | 1.0022 | 0.0038 | 77.62 |
| 13 | 44574009  | rs4483759  | C | G | 4 | 0.08765  | 0.9802 | 0.9221 | 0.9972 | 0.0056 | 76.17 |
| 4  | 58886180  | rs7435172  | C | T | 3 | 0.1433   | 0.9804 | 1.0598 | 1.0027 | 0.0017 | 84.34 |
| 3  | 30322358  | rs1495579  | G | T | 4 | 0.1844   | 0.981  | 1.0483 | 1.002  | 0.0039 | 77.58 |
| 1  | 55456607  | rs12409699 | A | G | 4 | 0.3107   | 0.9821 | 0.9584 | 1.0022 | 0.0064 | 75.62 |
| 1  | 55459204  | rs17111725 | A | G | 4 | 0.2051   | 0.9832 | 0.9497 | 0.998  | 0.0054 | 76.32 |
| 12 | 87284400  | rs10777108 | A | C | 4 | 0.0892   | 0.9858 | 1.2084 | 1.0053 | 0.0019 | 79.91 |
| 3  | 30343934  | rs7653488  | C | T | 4 | 0.2956   | 0.9861 | 0.9626 | 1.0015 | 0.0035 | 77.98 |
| 1  | 4497861   | rs608492   | C | G | 4 | 0.1412   | 0.9867 | 1.055  | 1.0014 | 0.0036 | 77.81 |
| 2  | 232148981 | rs10182727 | A | T | 4 | 0.4446   | 0.9869 | 1.0489 | 1.0031 | 0.0001 | 85.72 |
| 3  | 134933123 | rs16840751 | A | G | 3 | 0.008903 | 0.9872 | 1.3262 | 0.9936 | 0.0106 | 78    |
| 8  | 14906737  | rs10888094 | A | G | 4 | 0.1909   | 0.9873 | 1.0472 | 0.9987 | 0.0037 | 77.76 |
| 8  | 14906785  | rs10888095 | A | C | 4 | 0.138    | 0.9874 | 1.0532 | 1.0013 | 0.0034 | 78.07 |
| 3  | 134936517 | rs10935083 | C | T | 3 | 0.00896  | 0.9875 | 1.3317 | 1.0064 | 0.0109 | 77.86 |
| 15 | 51288845  | rs17545973 | C | T | 4 | 0.1089   | 0.9877 | 0.9263 | 1.002  | 0.0006 | 82.61 |
| 7  | 53069854  | rs4947777  | G | T | 4 | 0.1006   | 0.9881 | 1.0737 | 1.0015 | 0.0058 | 76.03 |
| 2  | 232133520 | rs6733018  | A | G | 4 | 0.5246   | 0.9885 | 1.0411 | 0.9973 | 0.0001 | 85.6  |
| 8  | 14907628  | rs2012994  | A | G | 4 | 0.1925   | 0.9885 | 1.047  | 1.0011 | 0.0081 | 74.57 |
| 3  | 134920716 | rs4582061  | A | G | 3 | 0.009927 | 0.9888 | 1.3127 | 0.9945 | 0.012  | 77.39 |
| 3  | 134920291 | rs16840699 | C | T | 3 | 0.01004  | 0.989  | 0.7621 | 1.0055 | 0.0122 | 77.32 |
| 1  | 55456395  | rs6668777  | A | C | 4 | 0.3092   | 0.9891 | 0.9591 | 1.0013 | 0.0045 | 77.05 |
| 2  | 232134007 | rs12993888 | A | G | 4 | 0.5001   | 0.9893 | 1.0434 | 0.9975 | 0.0001 | 85.92 |
| 3  | 134920954 | rs11717407 | A | G | 3 | 0.009699 | 0.9902 | 0.7612 | 1.0048 | 0.012  | 77.4  |
| 3  | 134921034 | rs9847885  | C | T | 3 | 0.009699 | 0.9902 | 0.7612 | 1.0048 | 0.012  | 77.4  |
| 1  | 202851008 | rs2045624  | C | G | 4 | 0.258    | 0.9904 | 0.9584 | 1.001  | 0.0056 | 76.15 |
| 8  | 82122134  | rs2127938  | C | T | 4 | 0.01483  | 0.9909 | 0.8297 | 0.9978 | 0.0036 | 77.88 |
| 1  | 55457932  | rs7529366  | A | G | 4 | 0.2588   | 0.9912 | 1.0474 | 1.0011 | 0.0051 | 76.53 |
| 3  | 24691672  | rs2362755  | G | T | 4 | 0.1617   | 0.9921 | 1.0505 | 0.9992 | 0.0046 | 76.98 |
| 7  | 52978744  | rs1919945  | C | T | 4 | 0.08493  | 0.9928 | 0.9197 | 0.9989 | 0.0031 | 78.41 |
| 8  | 82124010  | rs11986666 | A | C | 4 | 0.01805  | 0.9928 | 1.1965 | 0.9983 | 0.0036 | 77.85 |
| 1  | 4508064   | rs241220   | A | G | 4 | 0.1431   | 0.993  | 1.0538 | 1.0007 | 0.0039 | 77.59 |
| 8  | 82125199  | rs4585701  | C | T | 4 | 0.01881  | 0.994  | 1.1913 | 0.9986 | 0.0035 | 77.99 |

|    |           |            |   |   |   |         |        |        |        |        |       |
|----|-----------|------------|---|---|---|---------|--------|--------|--------|--------|-------|
| 15 | 51305758  | rs7168646  | A | G | 4 | 0.08202 | 0.9941 | 0.9241 | 1.001  | 0.0003 | 84.19 |
| 2  | 232130501 | rs1797392  | C | T | 4 | 0.5173  | 0.9948 | 0.9598 | 1.0012 | 0.0001 | 85.58 |
| 8  | 134268958 | rs16904845 | C | T | 4 | 0.5211  | 0.995  | 0.9753 | 1.0006 | 0.0008 | 82.05 |
| 6  | 95082112  | rs1235830  | C | T | 4 | 0.1997  | 0.9957 | 1.0648 | 0.9994 | 0.0043 | 77.24 |
| 1  | 4500481   | rs542688   | C | G | 4 | 0.1442  | 0.9964 | 0.9483 | 1.0004 | 0.0032 | 78.24 |
| 7  | 26498670  | rs757393   | C | T | 4 | 0.1213  | 0.9982 | 0.9441 | 0.9998 | 0.0074 | 74.99 |
| 3  | 30348345  | rs9841664  | C | T | 4 | 0.2584  | 0.9988 | 1.0421 | 1.0001 | 0.0048 | 76.75 |
| 3  | 134952715 | rs8177203  | A | G | 4 | 0.0551  | 0.9988 | 0.8514 | 1.0004 | 0.0015 | 80.52 |
| 2  | 232122582 | rs1797386  | C | T | 4 | 0.242   | 0.9994 | 0.9243 | 1.0001 | 0.0007 | 82.4  |
