# Supplementary material for: Genome-Wide Association Study of Suicide Attempts in Mood Disorder Patients
Source: Atypon-hosted journal article supplement (doi:10.1176/appi.ajp.2010.10040541), 2010-11-02
Supplement: ajp_167_12_1499_09.pdf [file ajp_167_12_1499_09.pdf]

Supplemental Table 4. SNPs with strongest evidence of association in 'candidate' suicide genes

|                          | <b>BD</b>  |    |            |      | <b>MDD</b> |    |            |      |
|--------------------------|------------|----|------------|------|------------|----|------------|------|
|                          | Best SNP   | A1 | min_p      | OR   | Best SNP   | A1 | min_p      | OR   |
| <i>ACE</i>               | rs6517653  | A  | 0.002333   | 0.80 | rs763211   | A  | 0.001852   | 1.95 |
| <i>ADRA2A</i>            | rs17128356 | C  | 0.2814     | 1.14 | rs11195418 | A  | 0.06722    | 1.97 |
| <i>AKT1</i>              | rs1130214  | A  | 0.2021     | 1.08 | rs1130214  | A  | 0.4135     | 1.11 |
| <i>COMT</i>              | rs887199   | A  | 0.004835   | 0.79 | rs933271   | C  | 0.1746     | 0.83 |
| <i>CRHBP</i>             | rs2055627  | A  | 0.012      | 0.81 | rs3792738  | A  | 0.08426    | 1.46 |
| <i>CRHR1</i>             | rs4074461  | G  | 0.047      | 1.16 | rs4074461  | G  | 0.06317    | 1.25 |
| <i>CRHR2</i>             | rs4722999  | C  | 0.1377     | 0.92 | rs255121   | C  | 0.02146    | 0.65 |
| <i>DRD2</i>              | rs4245147  | C  | 0.2325     | 0.94 | rs4421776  | A  | 0.05143    | 0.78 |
| <i>FKBP5</i>             | rs9296158  | A  | 0.01261    | 1.15 | rs1413896  | C  | 0.0144     | 0.71 |
| <i>HTR1A</i>             | rs12653018 | A  | 0.06849    | 1.10 | rs13361335 | G  | 0.2481     | 1.24 |
| <i>HTR2A</i>             | rs10507546 | A  | 0.007531   | 0.85 | rs17288723 | C  | 0.03458    | 1.41 |
| <i>LSAMP</i>             | rs2918217  | C  | 0.0001916* | 0.76 | rs17647013 | C  | 0.02548    | 0.66 |
| <i>NGFR</i> <sup>^</sup> | rs600120   | A  | 0.008181   | 0.87 | rs11466124 | C  | 0.1773     | 2.23 |
| <i>NOS1</i>              | rs12307921 | A  | 0.004323   | 0.73 | rs7528328  | C  | 0.0004705~ | 0.52 |
| <i>NTRK2</i>             | rs10780688 | A  | 0.003991   | 0.86 | rs17087824 | G  | 0.003523   | 1.75 |
| <i>SLC6A4</i>            | rs7214991  | A  | 0.00946    | 1.16 | rs2054847  | A  | 0.02365    | 1.30 |
| <i>TAAR6</i>             | rs7764564  | C  | 0.2019     | 1.18 | rs9493390  | G  | 0.1094     | 0.82 |
| <i>TPH1</i>              | rs10766452 | C  | 0.105      | 0.92 | rs17794760 | A  | 0.1763     | 1.23 |
| <i>TPH2</i>              | rs11179015 | C  | 0.1916     | 0.77 | rs7955501  | A  | 0.1702     | 0.85 |

~ in NESDA replication cohort, p=0.014, OR=1.47 for 'C' allele

\* in GAIN replication cohort, p=0.73

A1, reference allele; OR, odds ratio

<sup>^</sup> Nerve Growth Factor Receptor (NGFR; referred to as p75(NTR) in original publication
