# Supplementary figures and images for: Genome-Wide Association Study of Suicide Attempts in Mood Disorder Patients
Source: Atypon-hosted journal article supplement (doi:10.1176/appi.ajp.2010.10040541), 2010-11-02

step\_n\_uk.SA.mach.R8  
lambda = 1.003

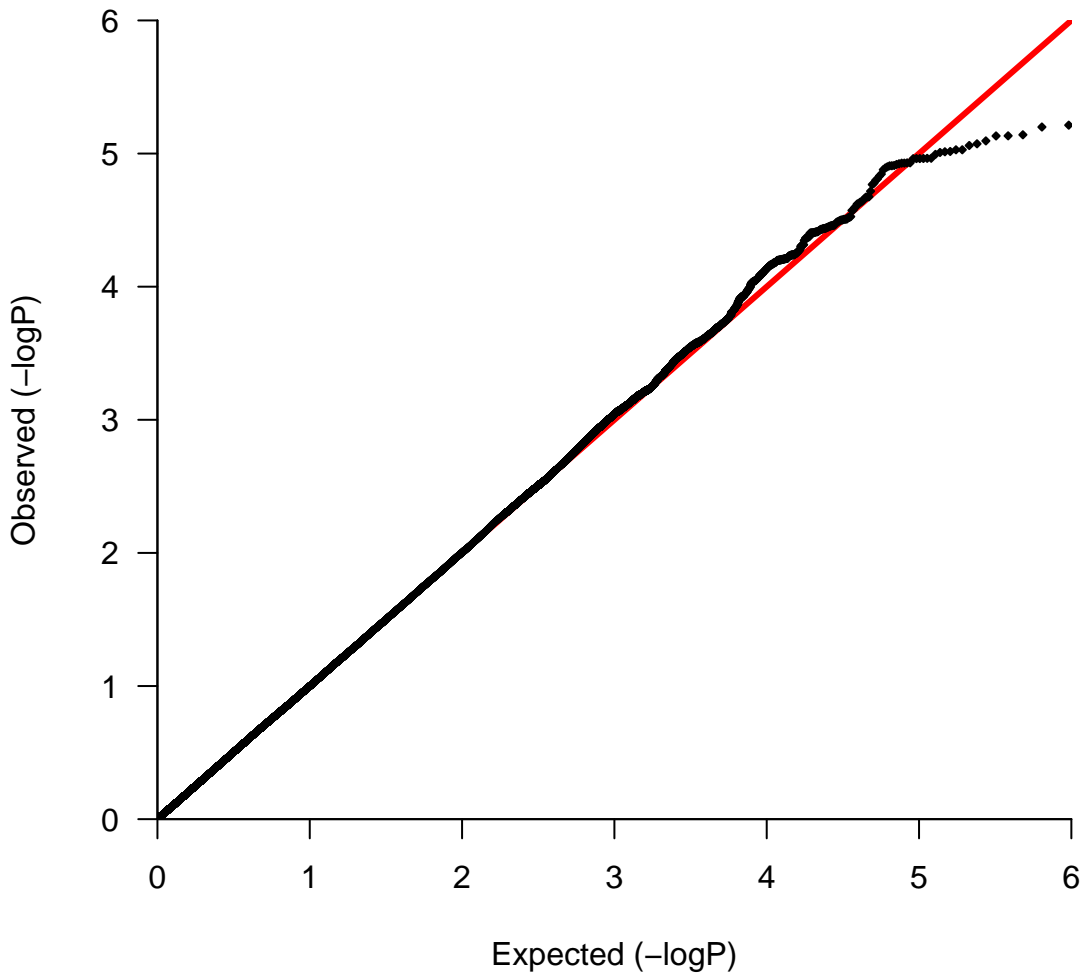

Supplement: ajp_167_12_1499_01.pdf [file ajp_167_12_1499_01.pdf]

# Suicide attempt in bipolar disorder

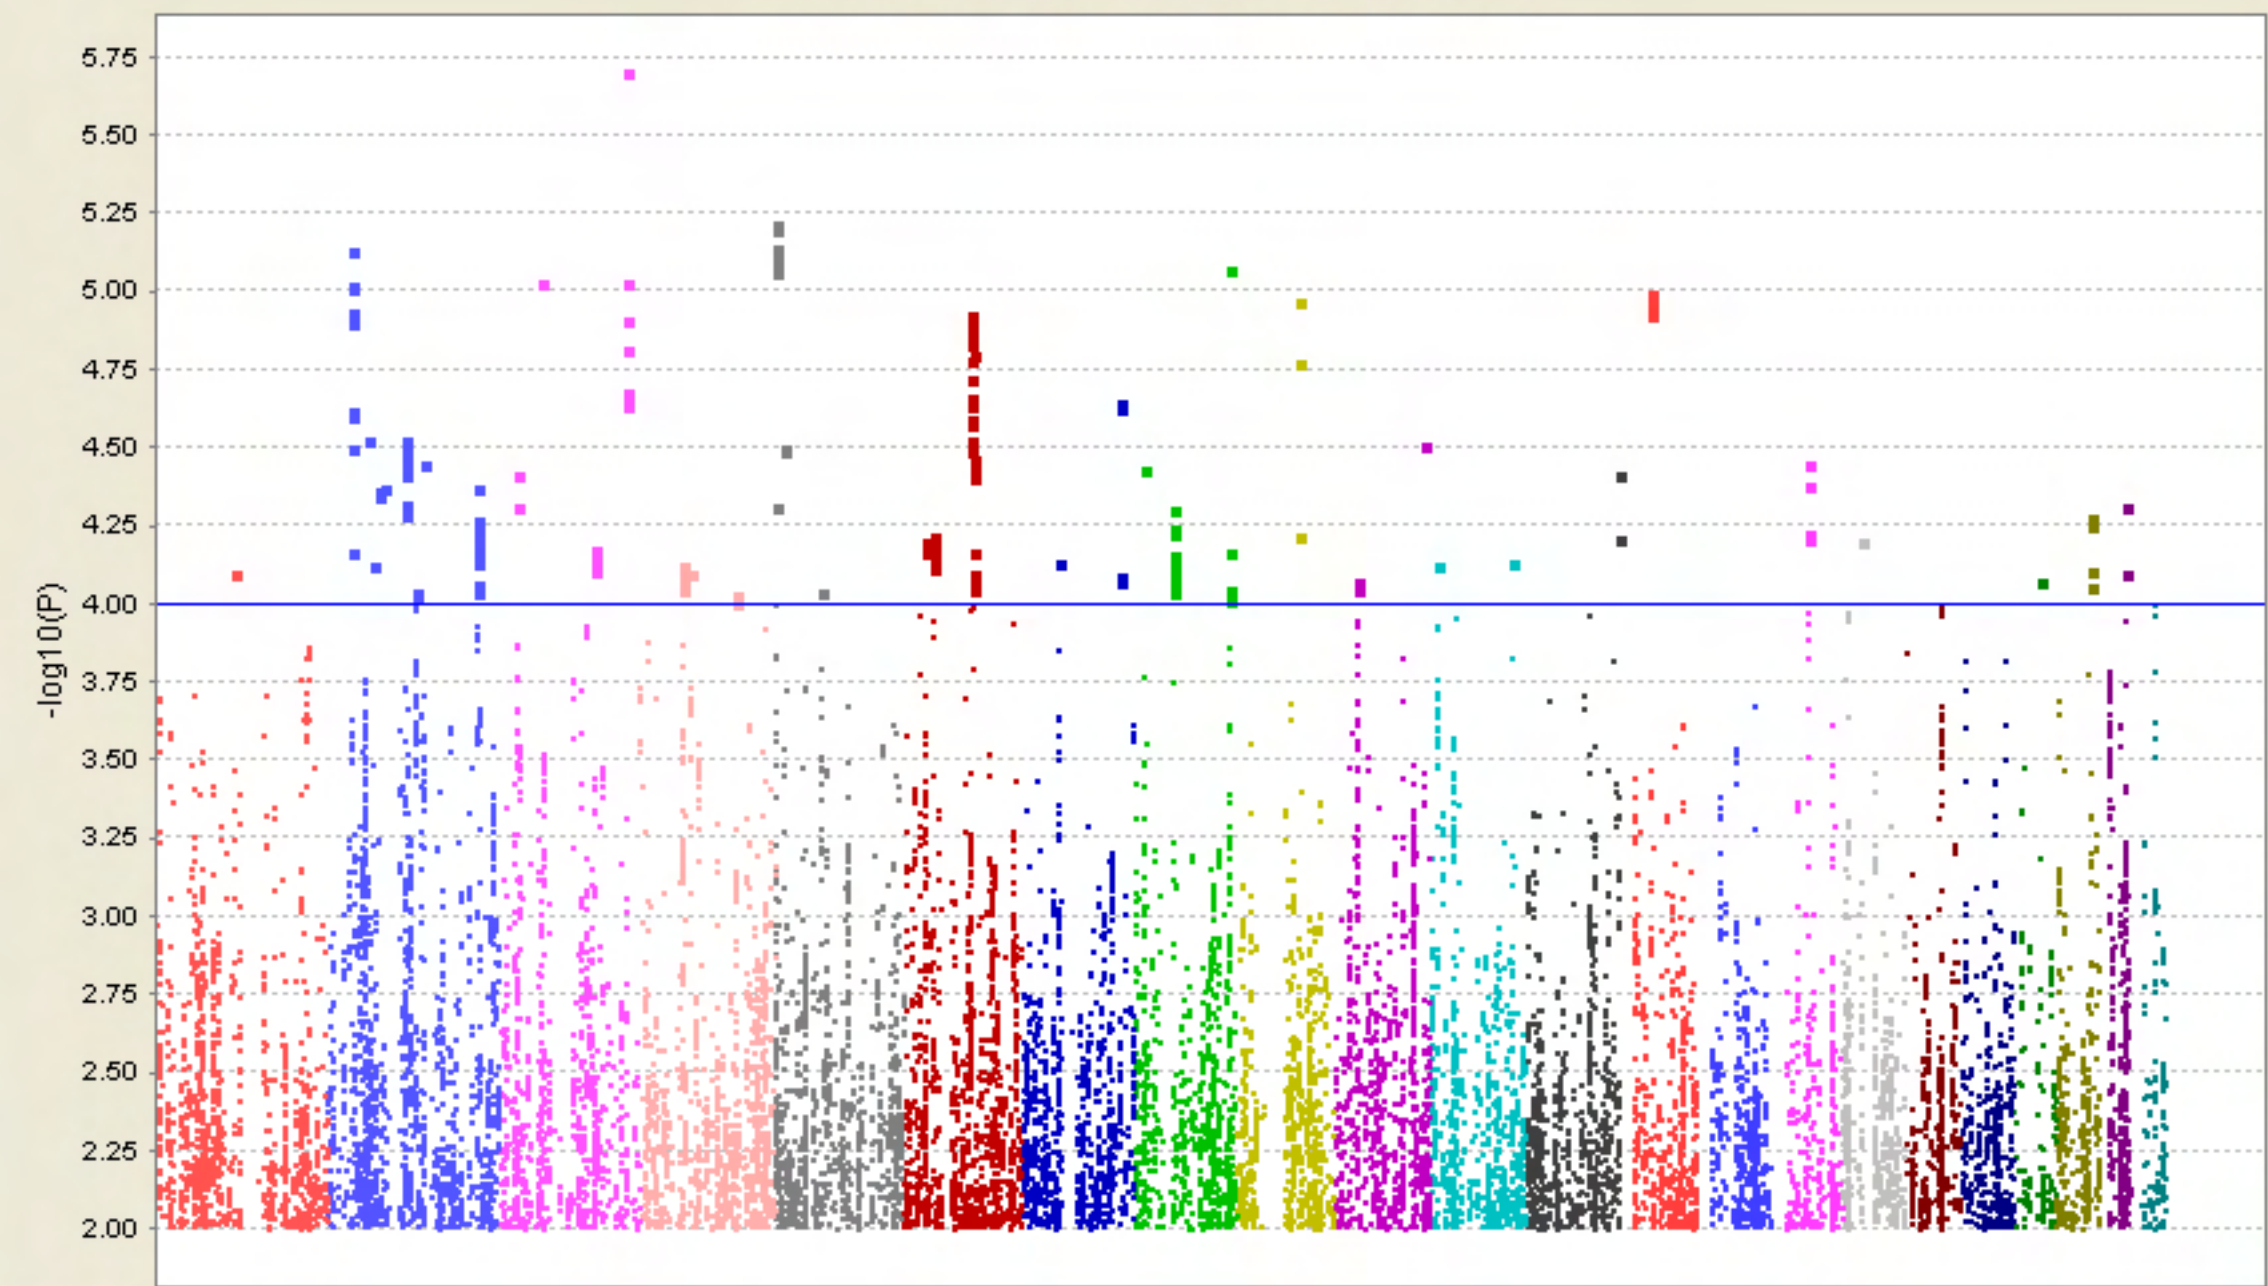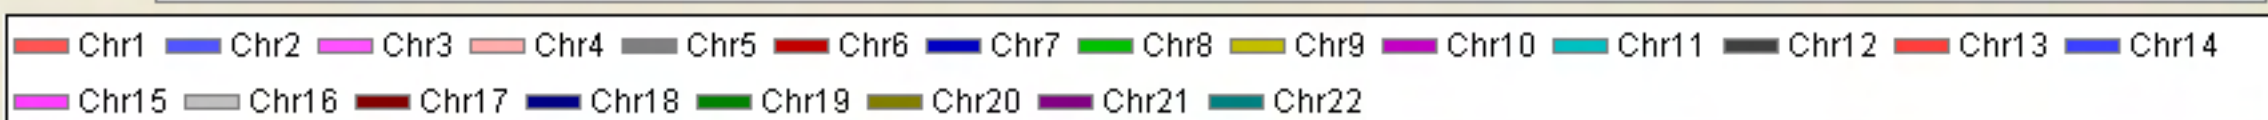

Supplement: ajp_167_12_1499_03.pdf [file ajp_167_12_1499_03.pdf]

stard.SA.mach.R8

lambda = 1.017

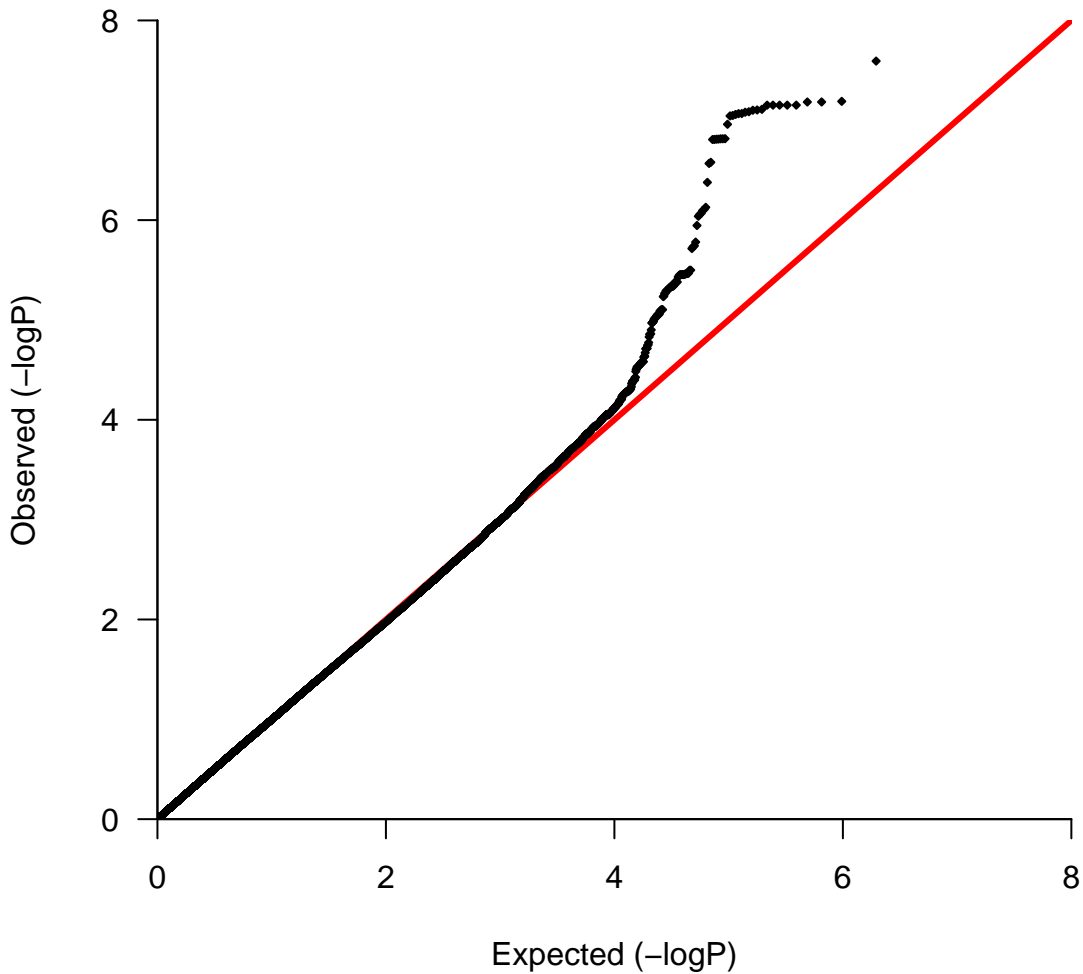

Supplement: ajp_167_12_1499_02.pdf [file ajp_167_12_1499_02.pdf]

# Suicide attempt in MDD (STAR\*D)

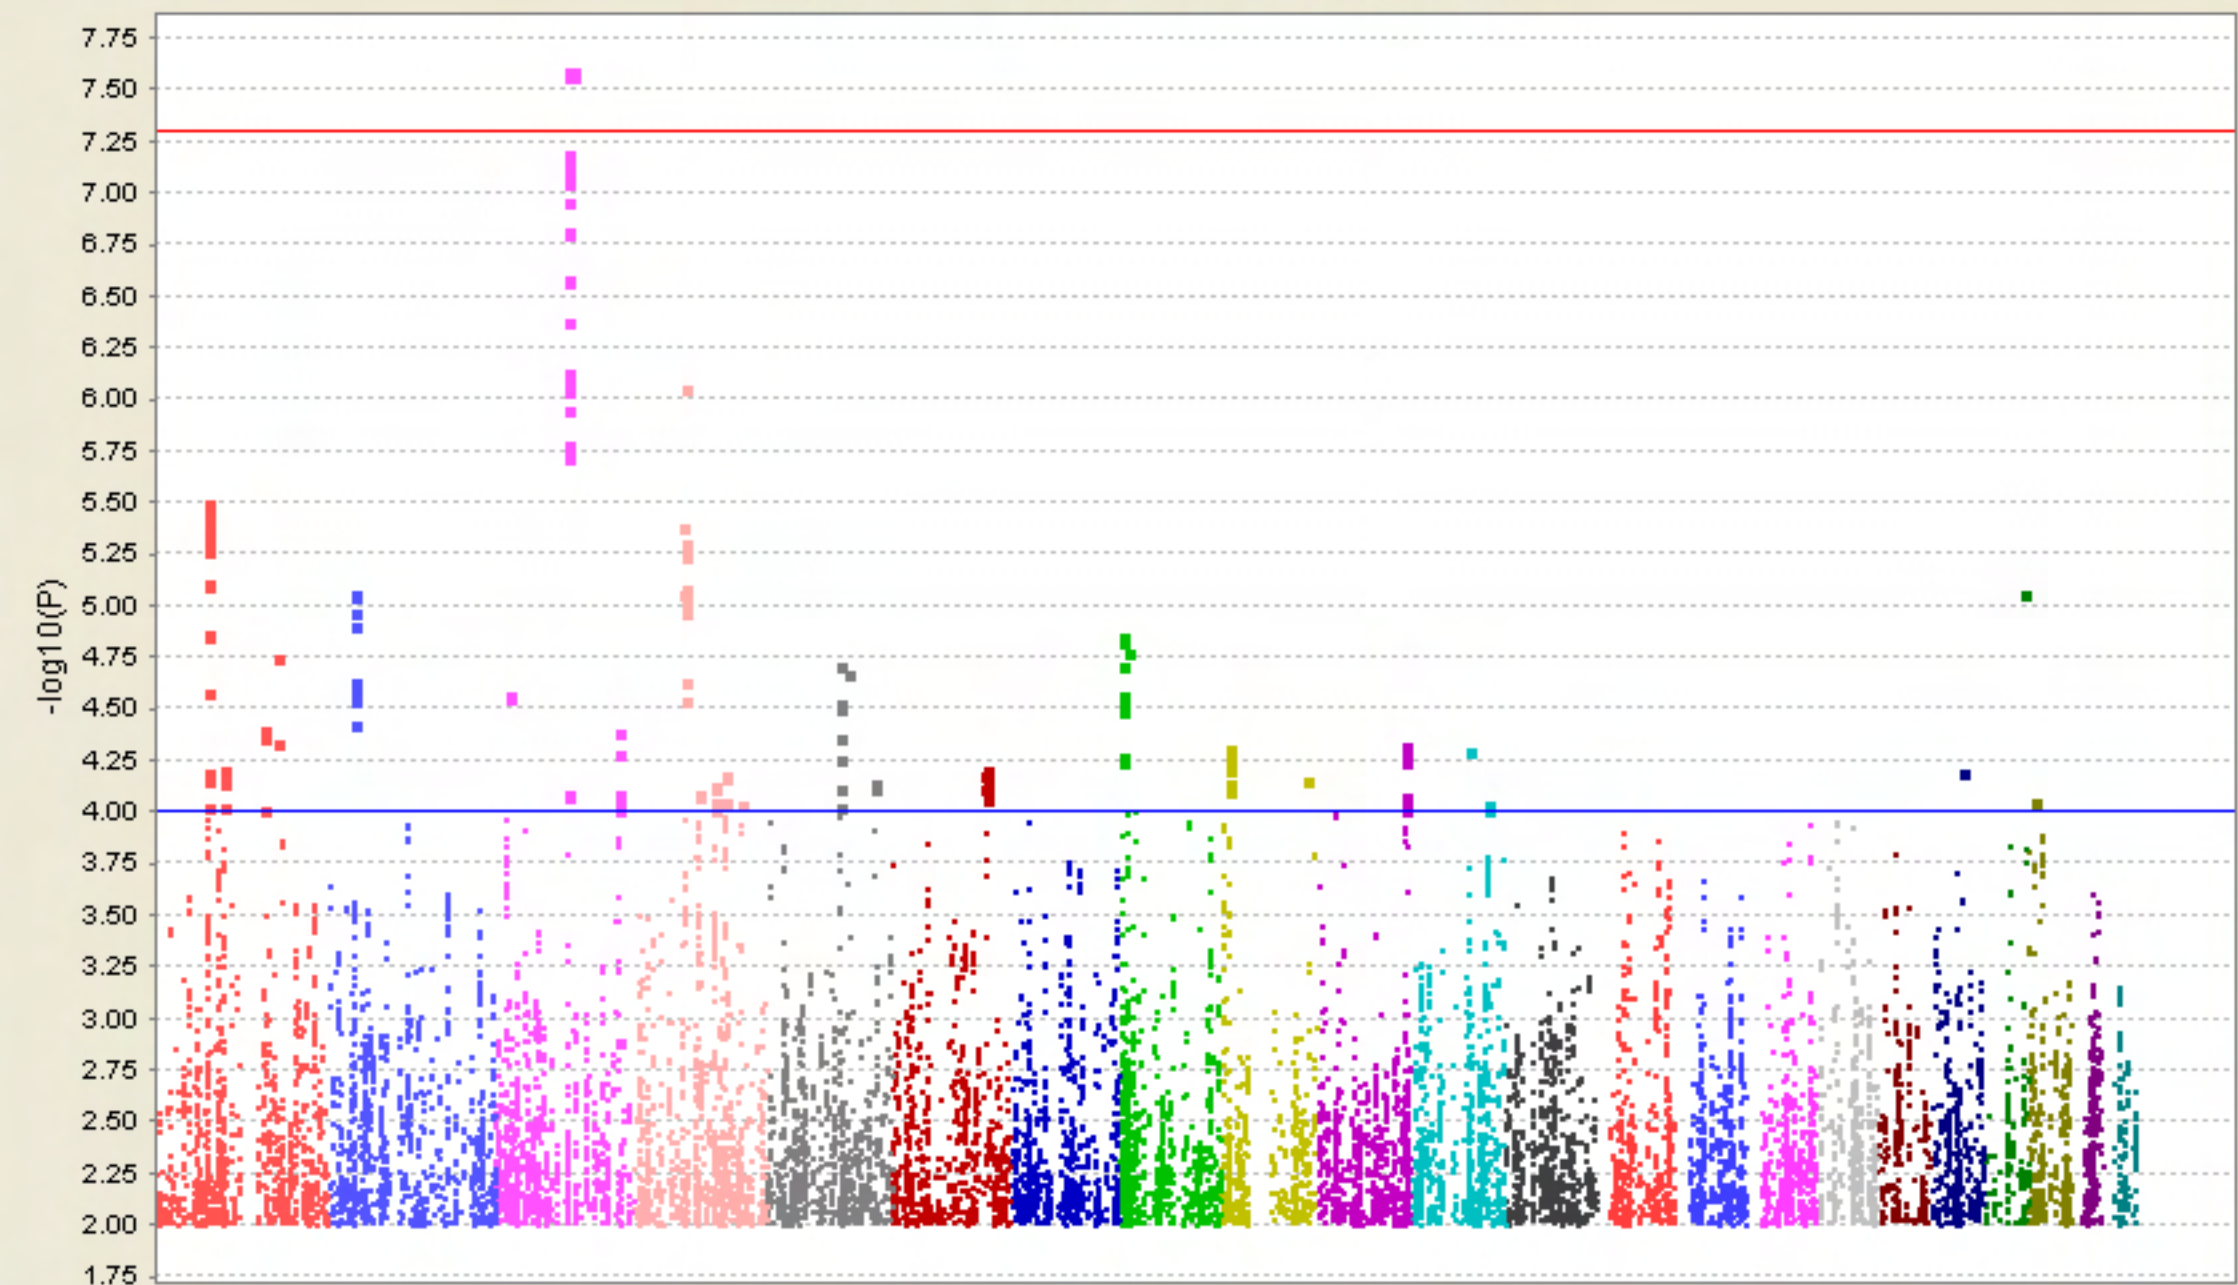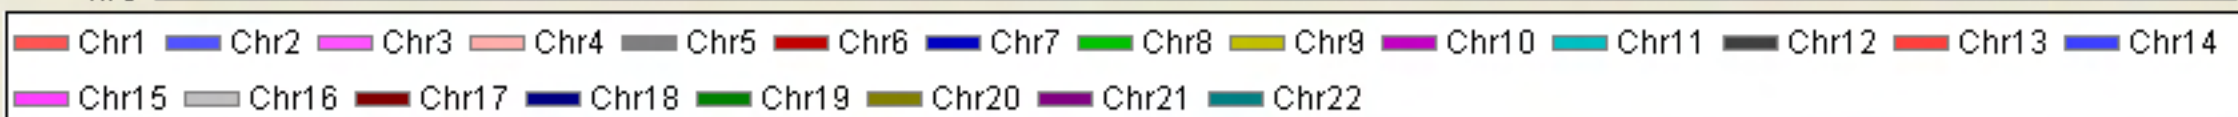

Supplement: ajp_167_12_1499_04.pdf [file ajp_167_12_1499_04.pdf]
